# Supplementary material for: H3K27ac acetylome signatures reveal the epigenomic reorganization in remodeled non-failing human hearts
Source: PubMed Central journal article supplement (PMC7362435; doi:10.1186/s13148-020-00895-5), 2020-07-14

# Cardiomyocytes

**ACTC1**

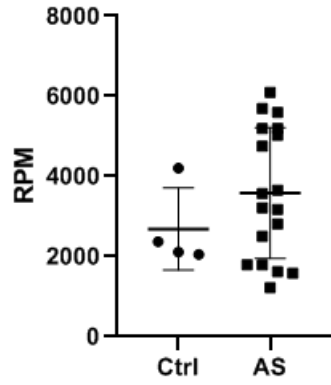

**ATP2A2**

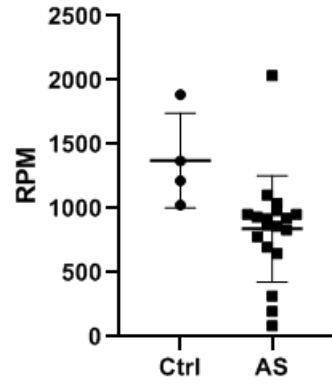

**CASQ2**

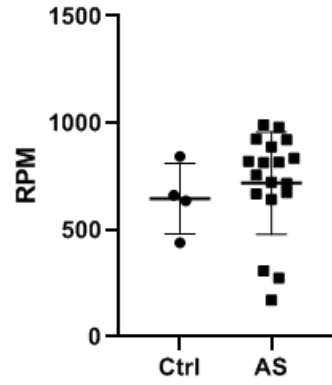

**CKMT2**

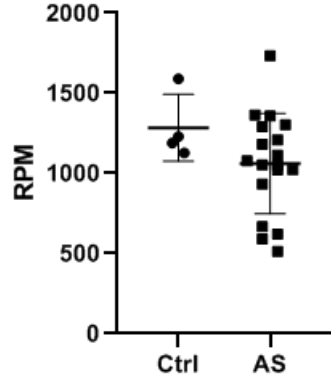

**DES**

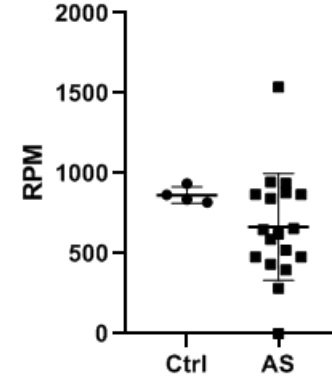

**MYBPC3**

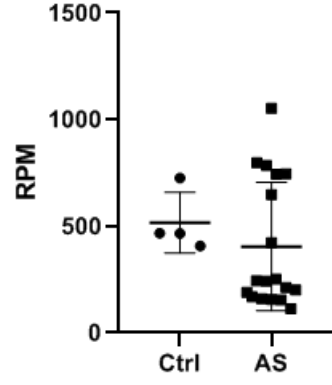

**MYH6**

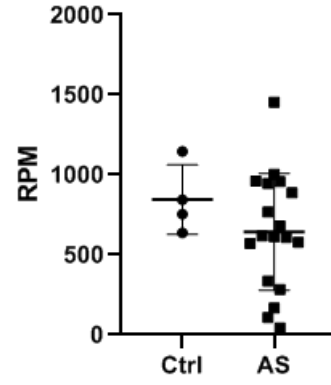

**MYL2**

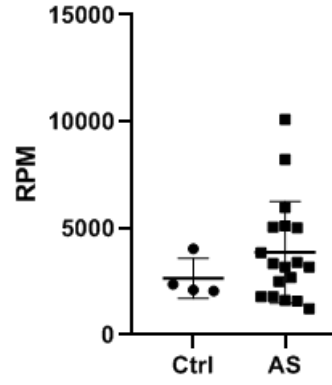

**MYL3**

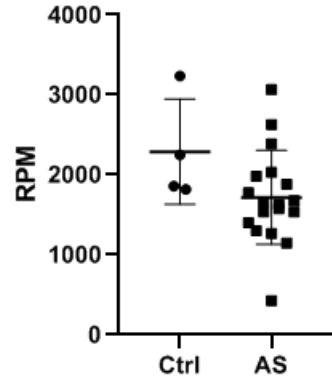

**MYOM1**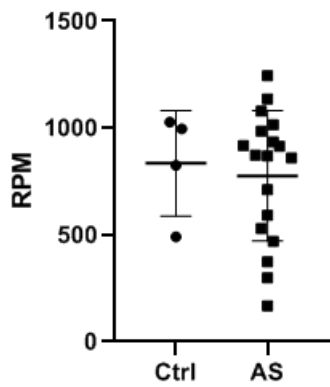**MYOZ2**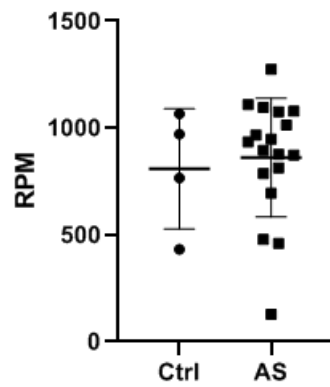**NPPA**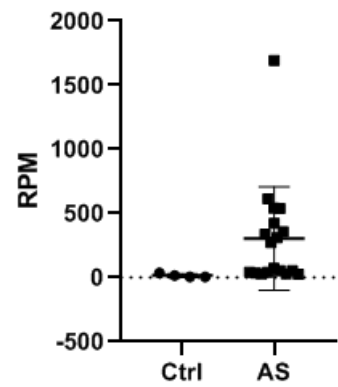**PLN**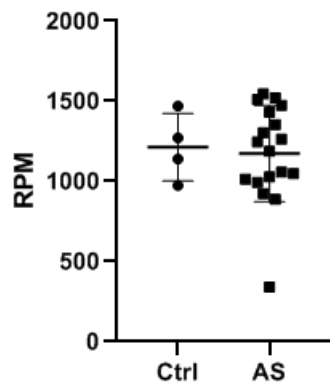**RYR2**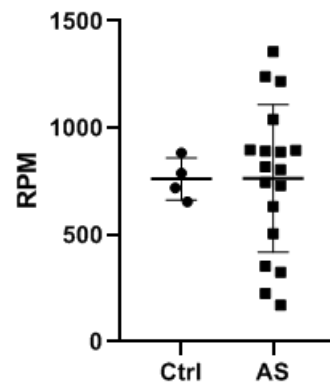**TNNC1**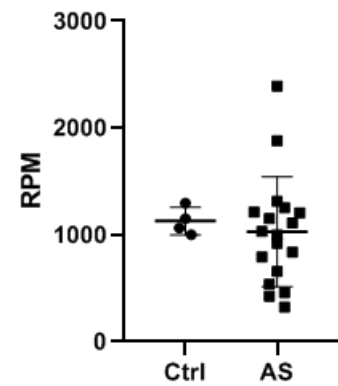**TNNI3**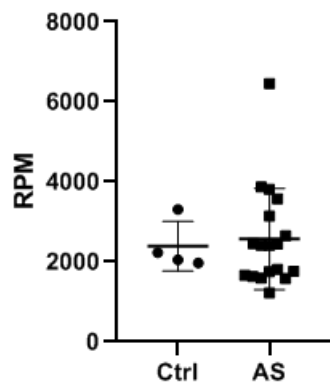**TNNT2**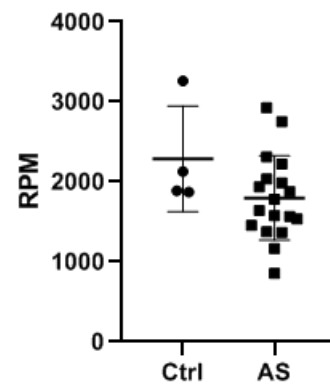**TPM1**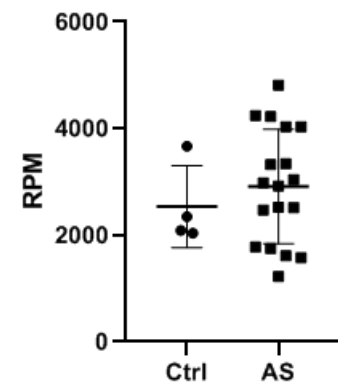**TTN**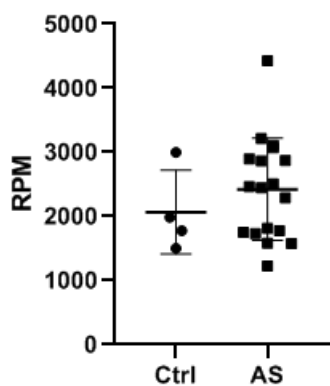

# Fibroblasts

### ABI3BP

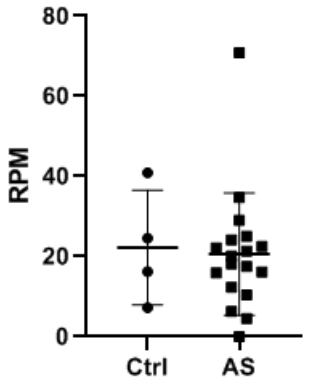

### ADAMTS5

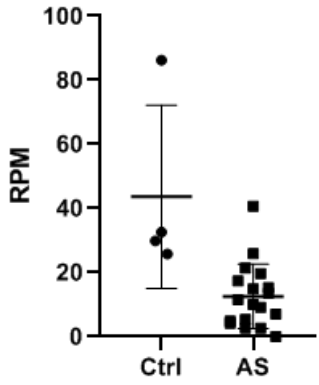

### DKK3

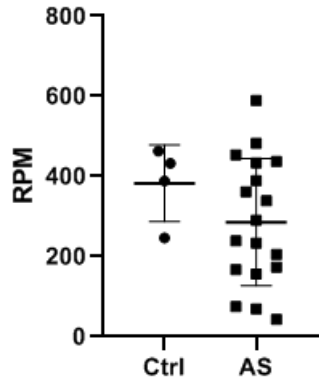

### DPEP1

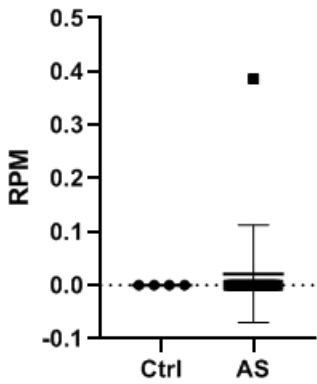

### ENTPD2

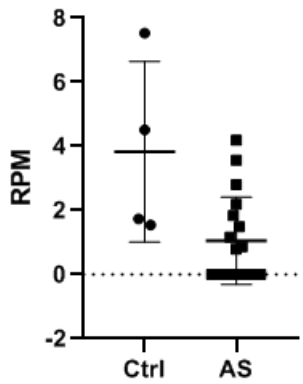

### FRZB

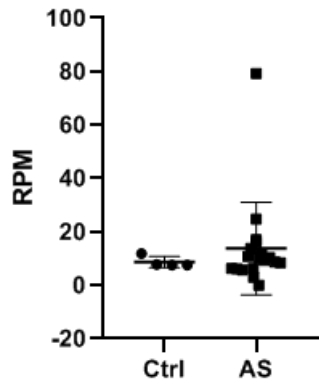

### GSTM5

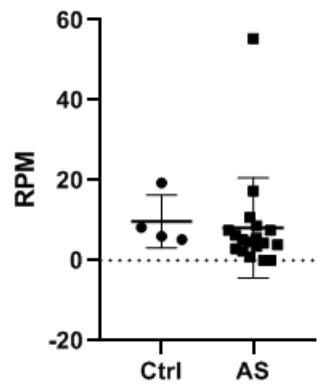

### LAMB1

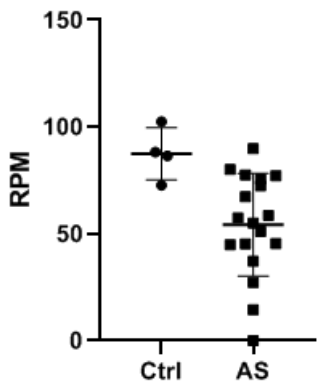

### LAMC1

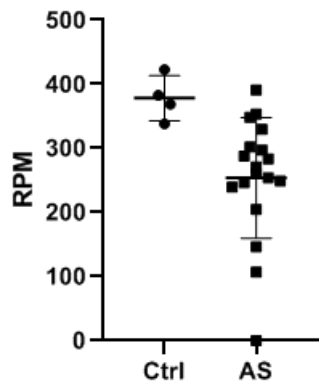

**MDK**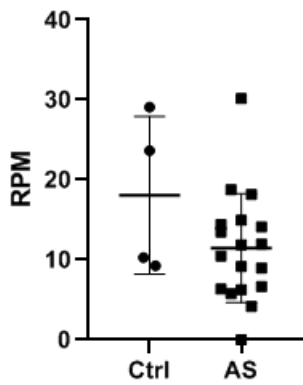**MEDAG**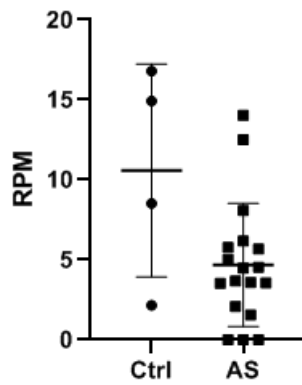**MEOX1**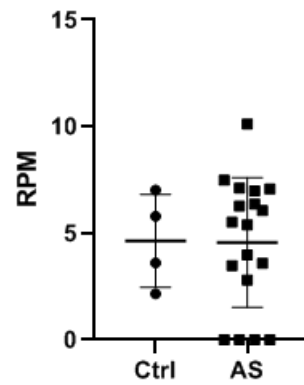**PCSK6**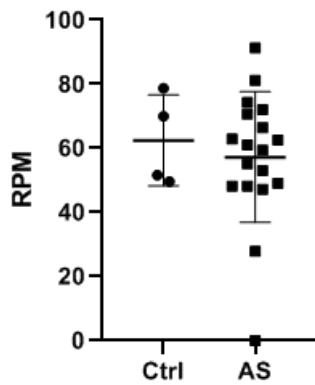**PDGFRA**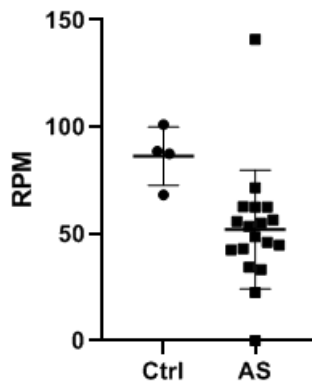**PDGFRL**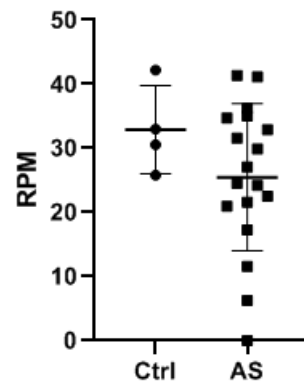**PRG4**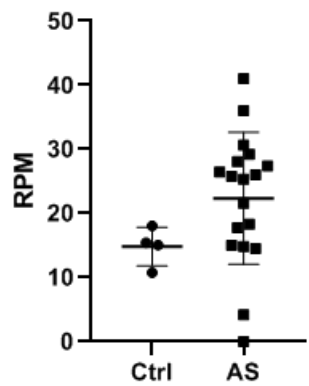**TBX20**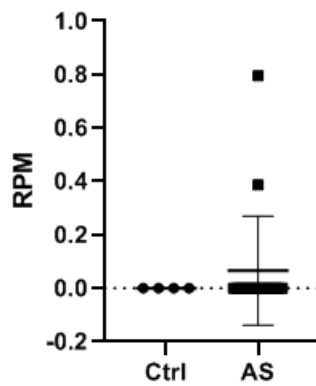**TCF21**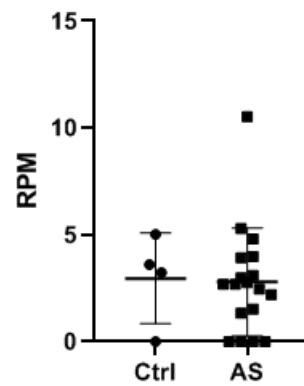**WIF1**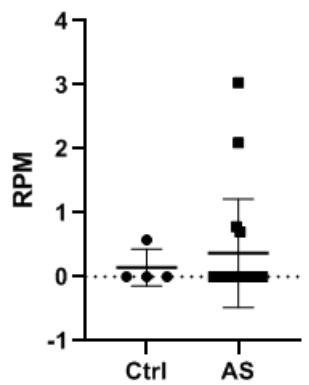



# Endothelial cells

**CDH5**

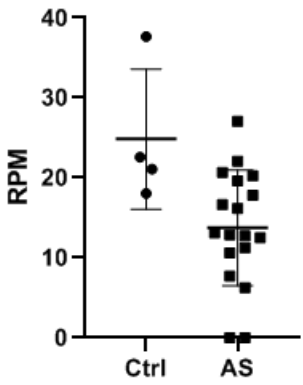

**EGFL7**

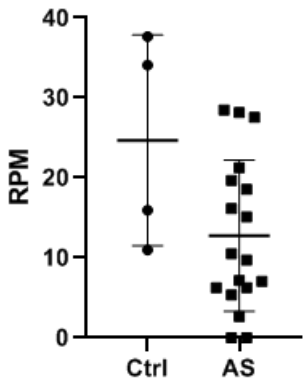

**EMCN**

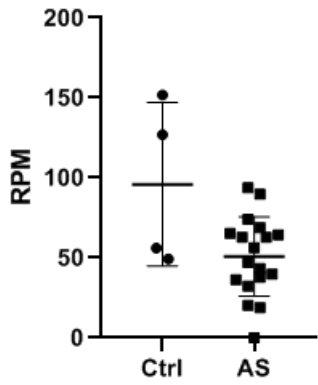

**GPIHBP1**

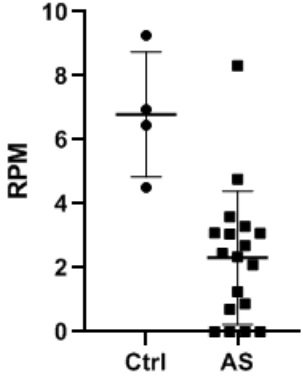

**KDR**

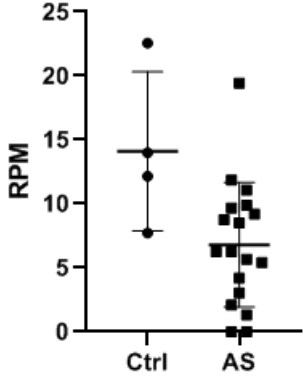

**MGLL**

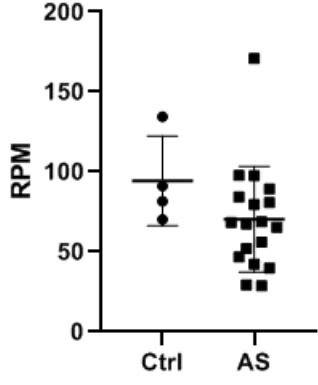

**PECAM1**

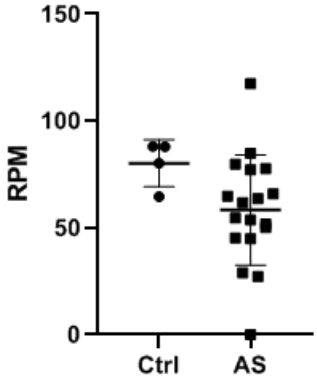

**RGCC**

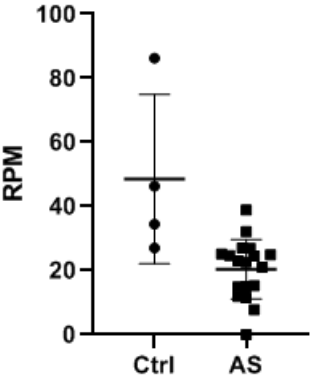

**SLC9A3R2**

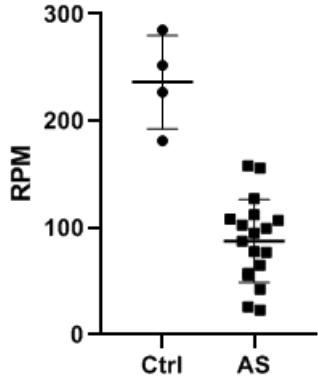

# Pericytes

## ABCC9

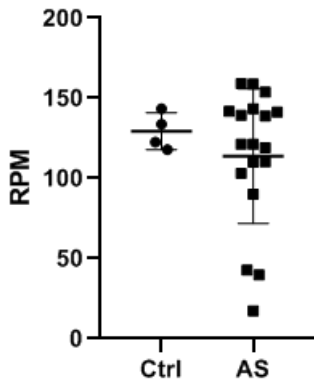

## COG7

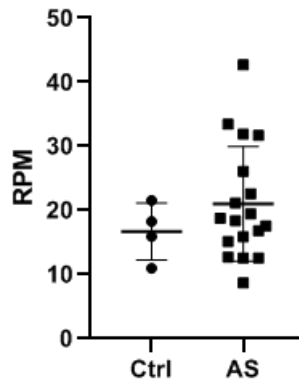

## COLEC11

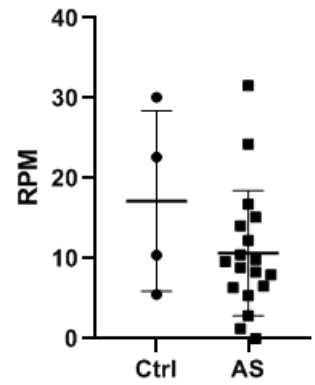

## GNB4

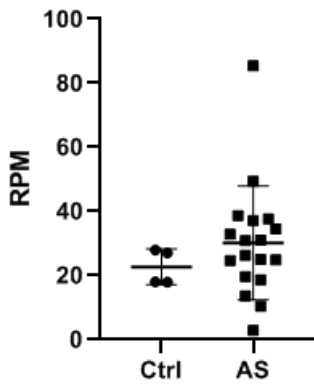

## HEYL

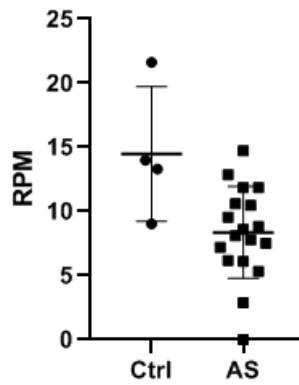

## KCNJ8

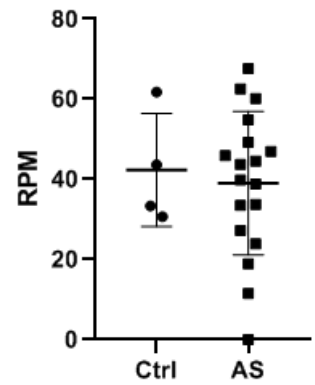

## MYO1B

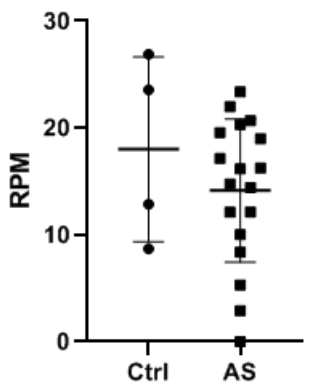

## P2RY14

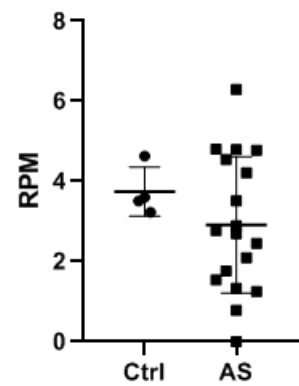

## STEAP4

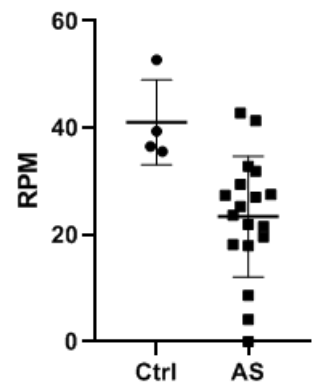

# VTN

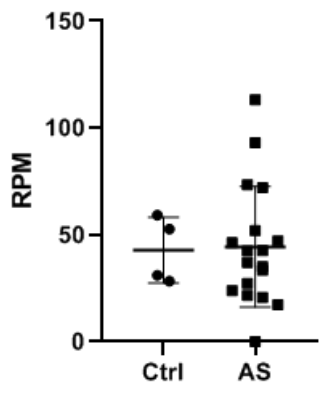



# Macrophages

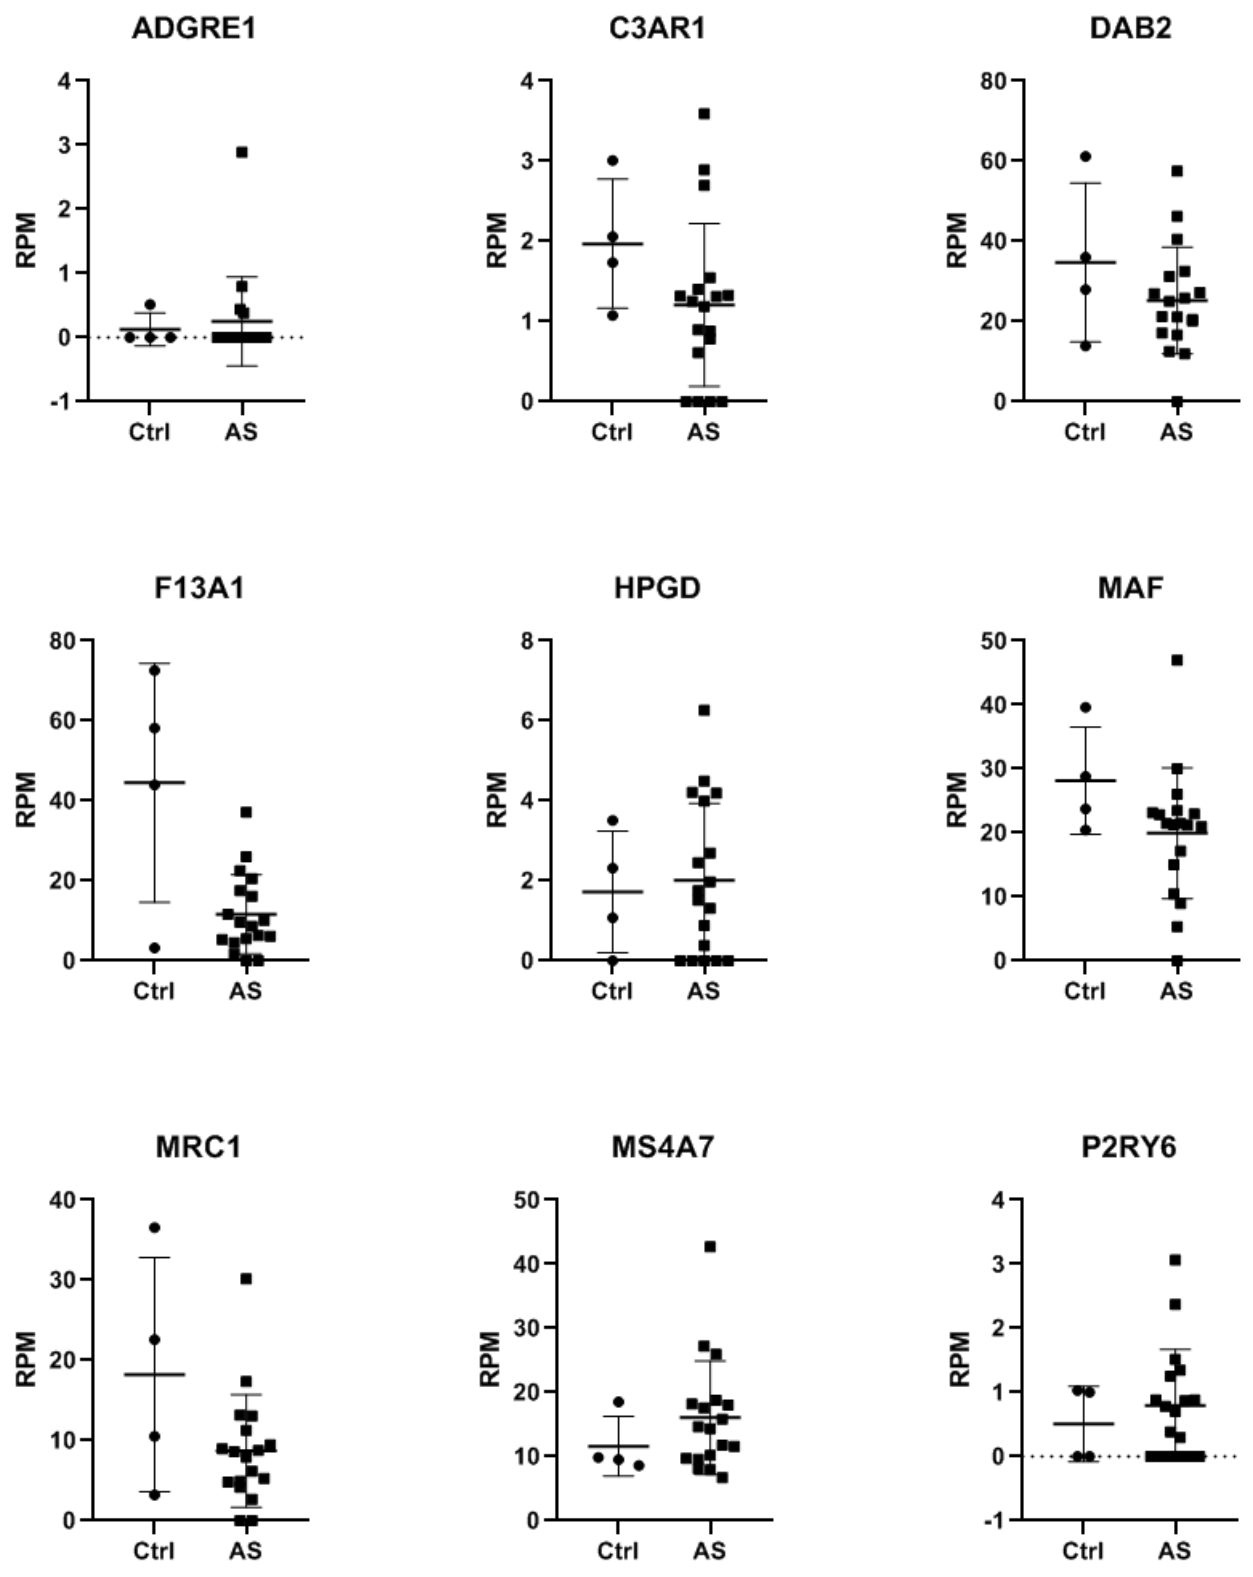

# T cells

### CD247

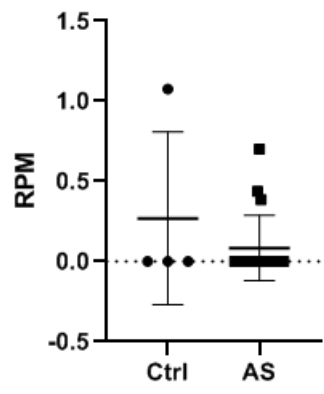

### CD3D

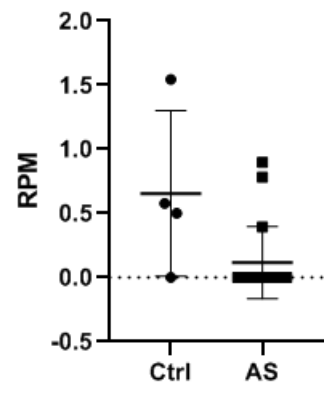

### CD3E

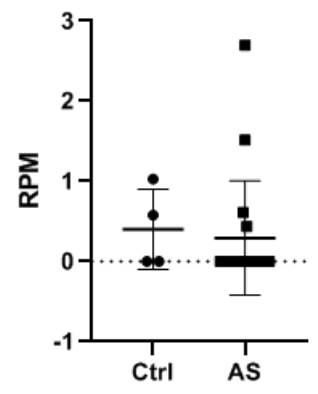

### CD3G

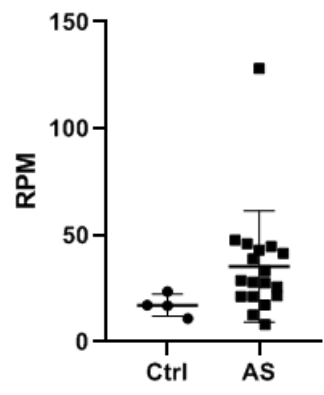

### IL7R

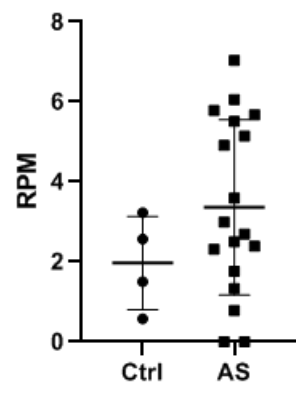

### ITK

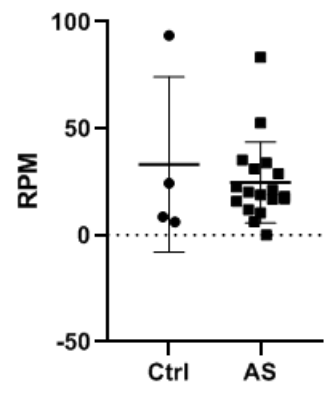

### LAT

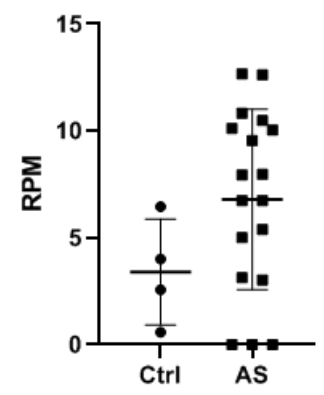

### LEF1

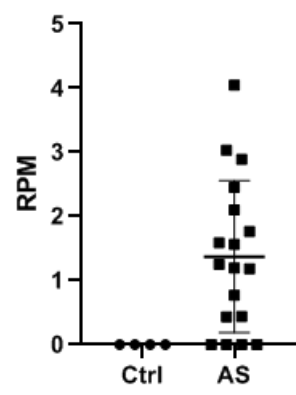

### SKAP1

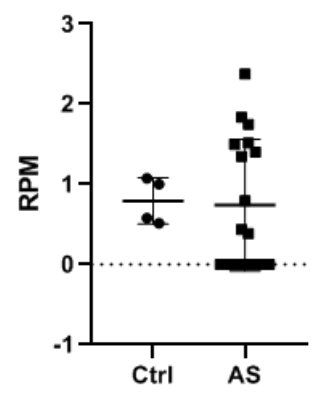

# TCF7

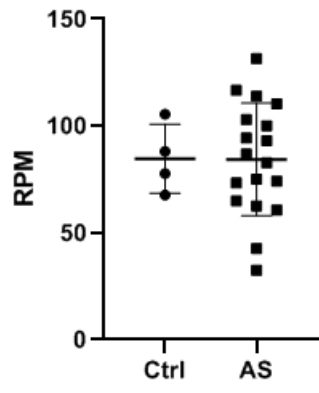

# B cells

### BANK1

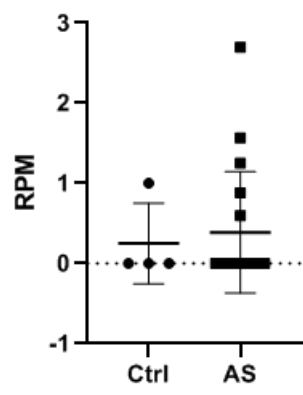

### CCR7

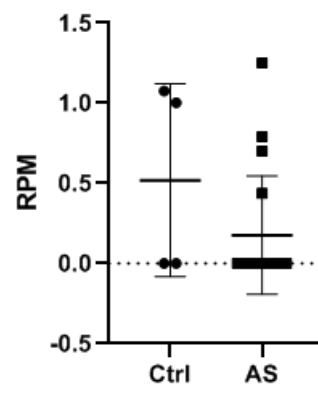

### CD55

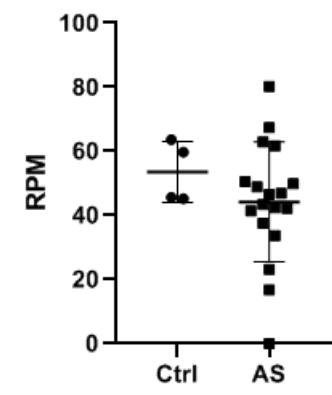

### CD79A

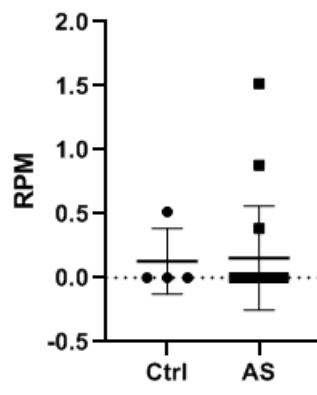

### CD79B

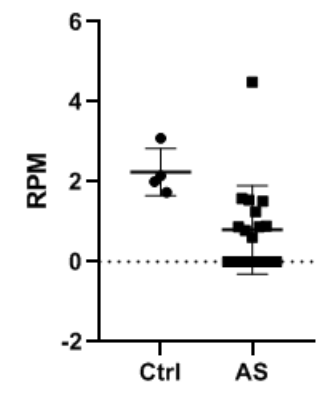

### FCMR

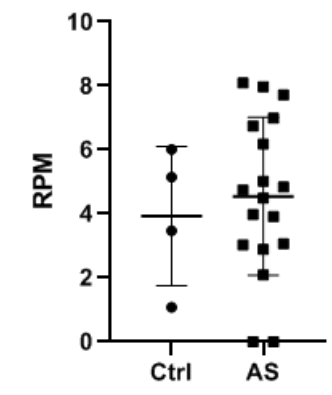

### LY6D

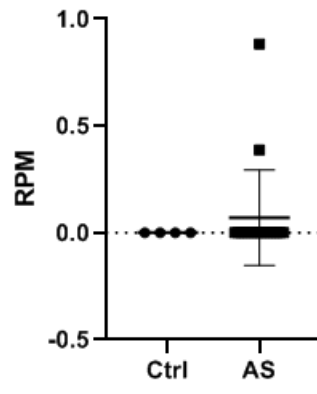

### MS4A1

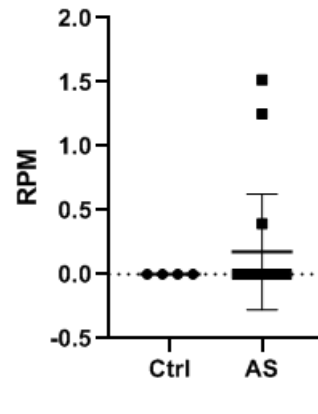

# NK cells

**CCL5**

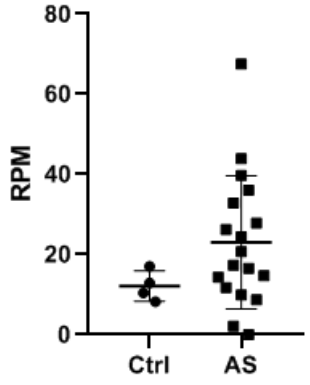

**CTSW**

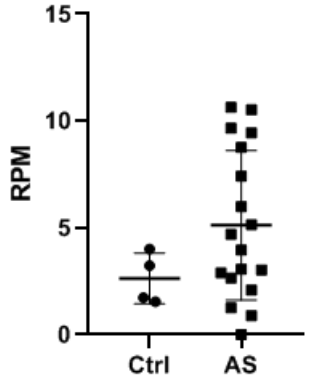

**GZMA**

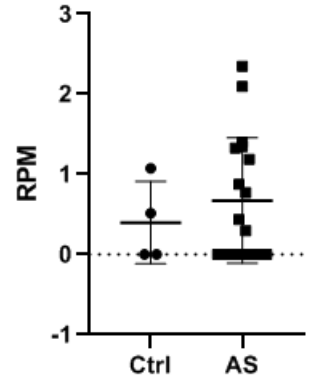

**GZMB**

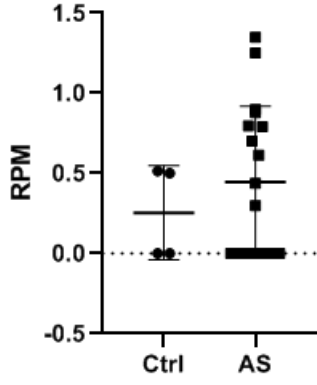

**KLRD1**

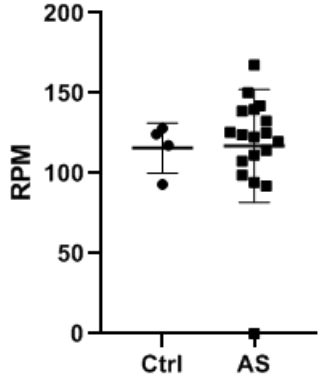

**KLRK1**

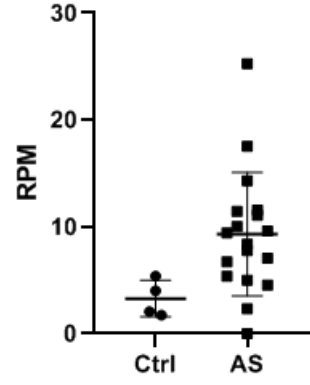

**NCR1**

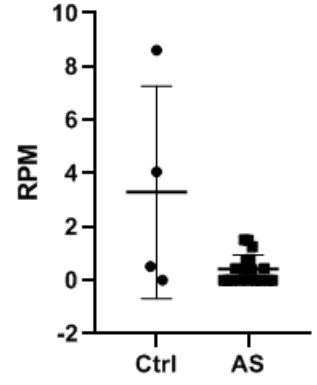

**NKG7**

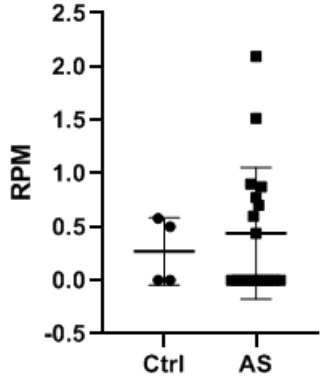

# DC-like cells

### CCR2

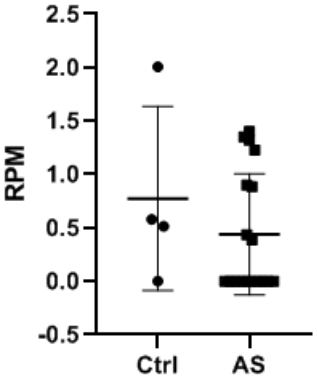

### H2AFY

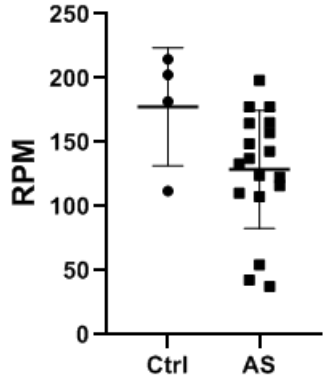

### LGALS3

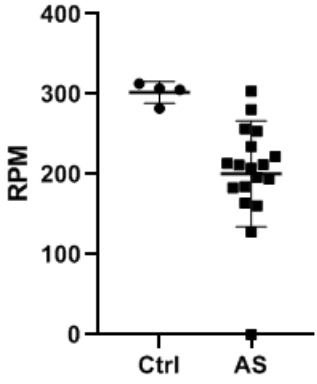

### NAAA

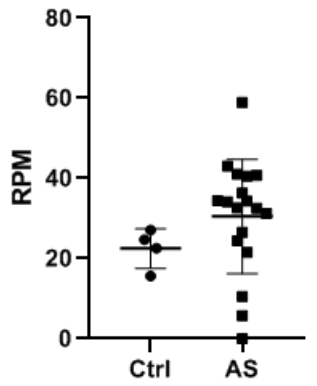

### NAPSA

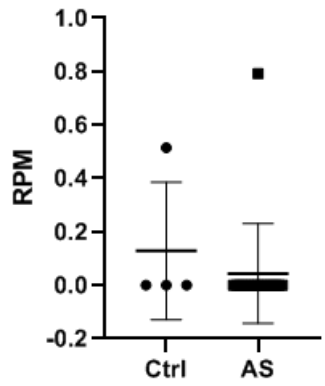

### PLAC8

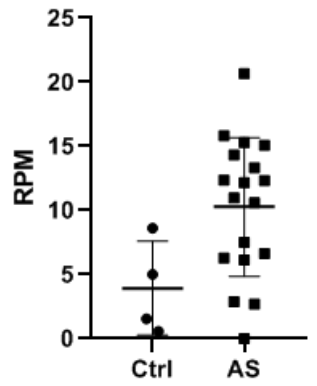

### PLBD1

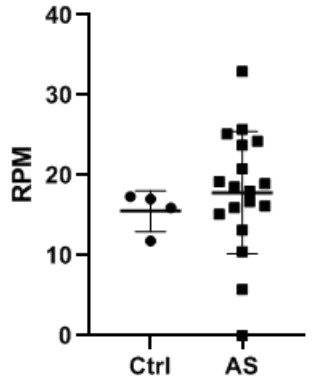

### RNASE6

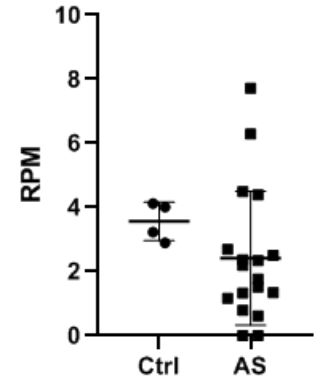

# Granulocytes

### CLEC4D

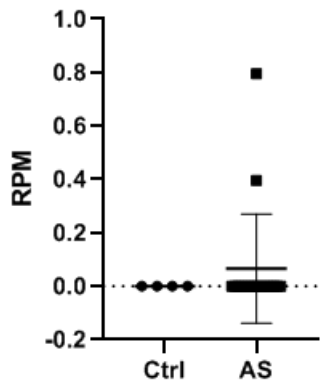

### CSF3R

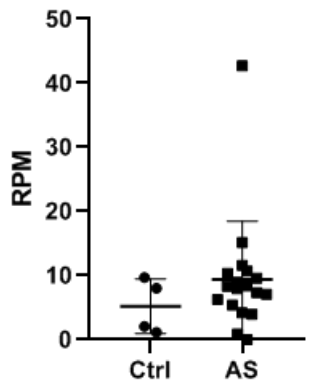

### HCAR2

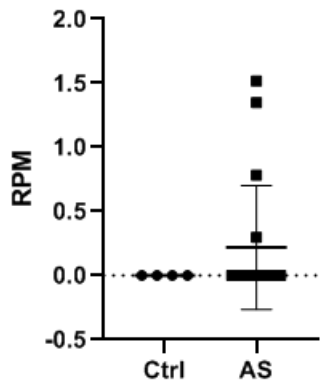

### HDC

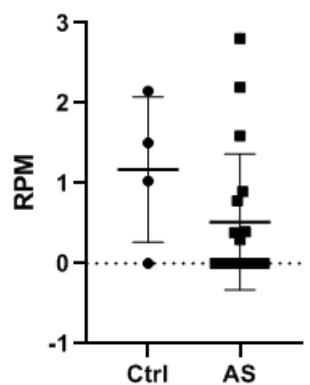

### HP

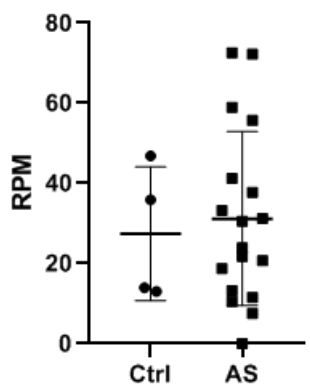

### LMNB1

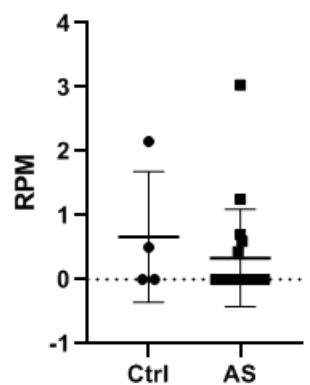

### S100A8

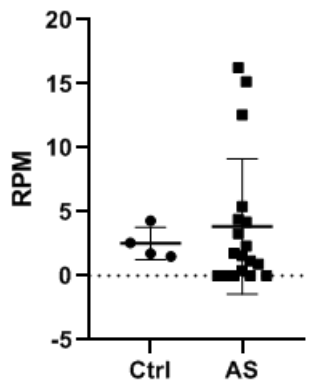

### S100A9

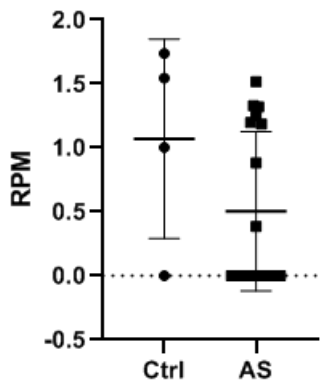

### SLPI

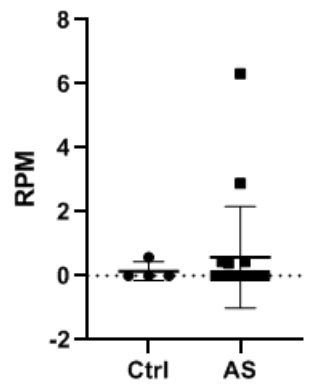

Supplement: 13148_2020_895_MOESM4_ESM.pdf [file 13148_2020_895_MOESM4_ESM.pdf]
