# Supplementary material for: H3K27ac acetylome signatures reveal the epigenomic reorganization in remodeled non-failing human hearts
Source: Clin Epigenetics. 2020 Jul 14;12:106. doi: 10.1186/s13148-020-00895-5 (PMC7362435; doi:10.1186/s13148-020-00895-5)

Supplementary Figure 5A  
Hyperacetylated genes

Significant Terms For: GO: Molecular Function

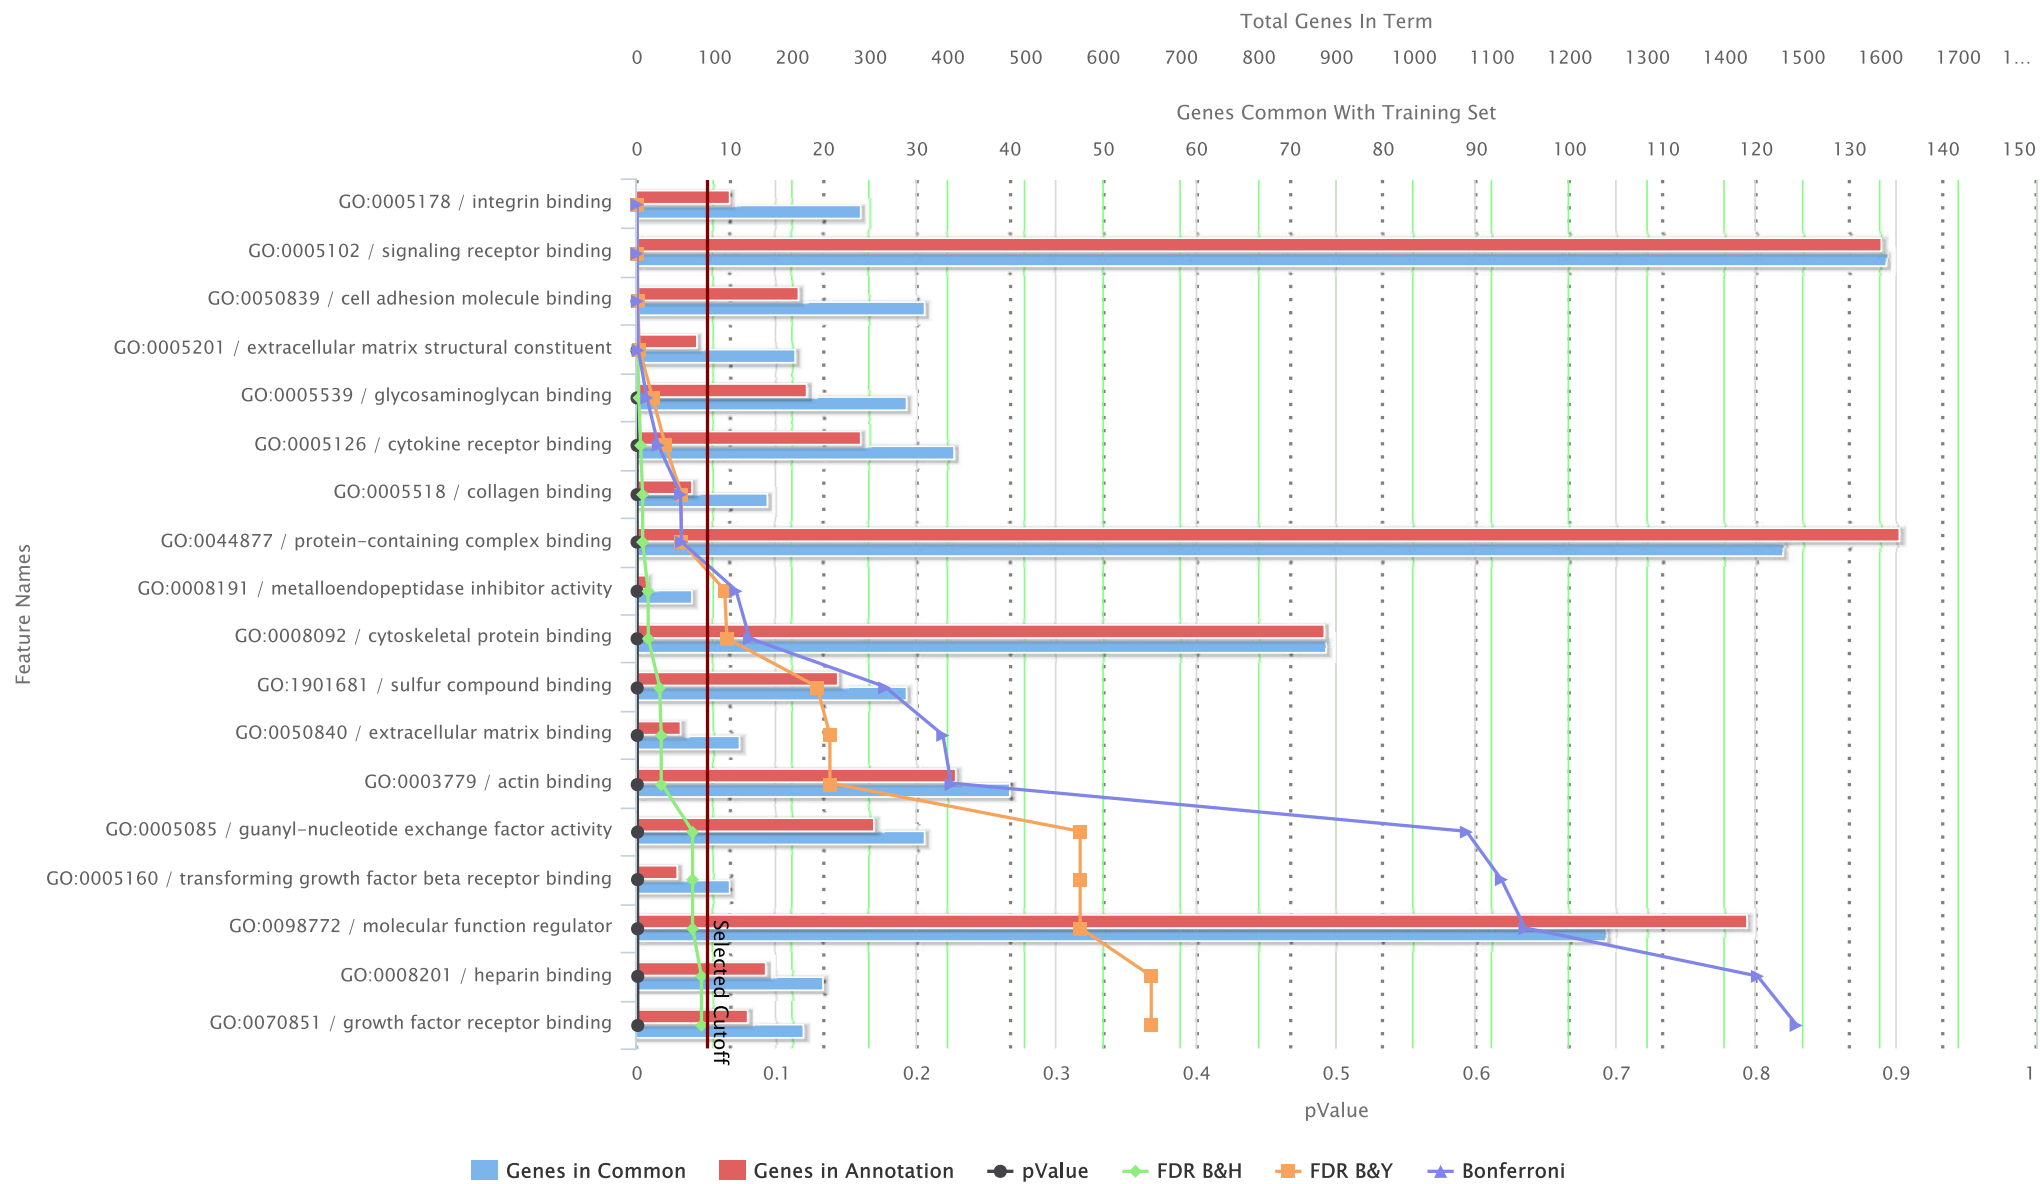

Supplementary Figure 5B  
Hyperacetylated genes

Significant Terms For: GO: Biological Process

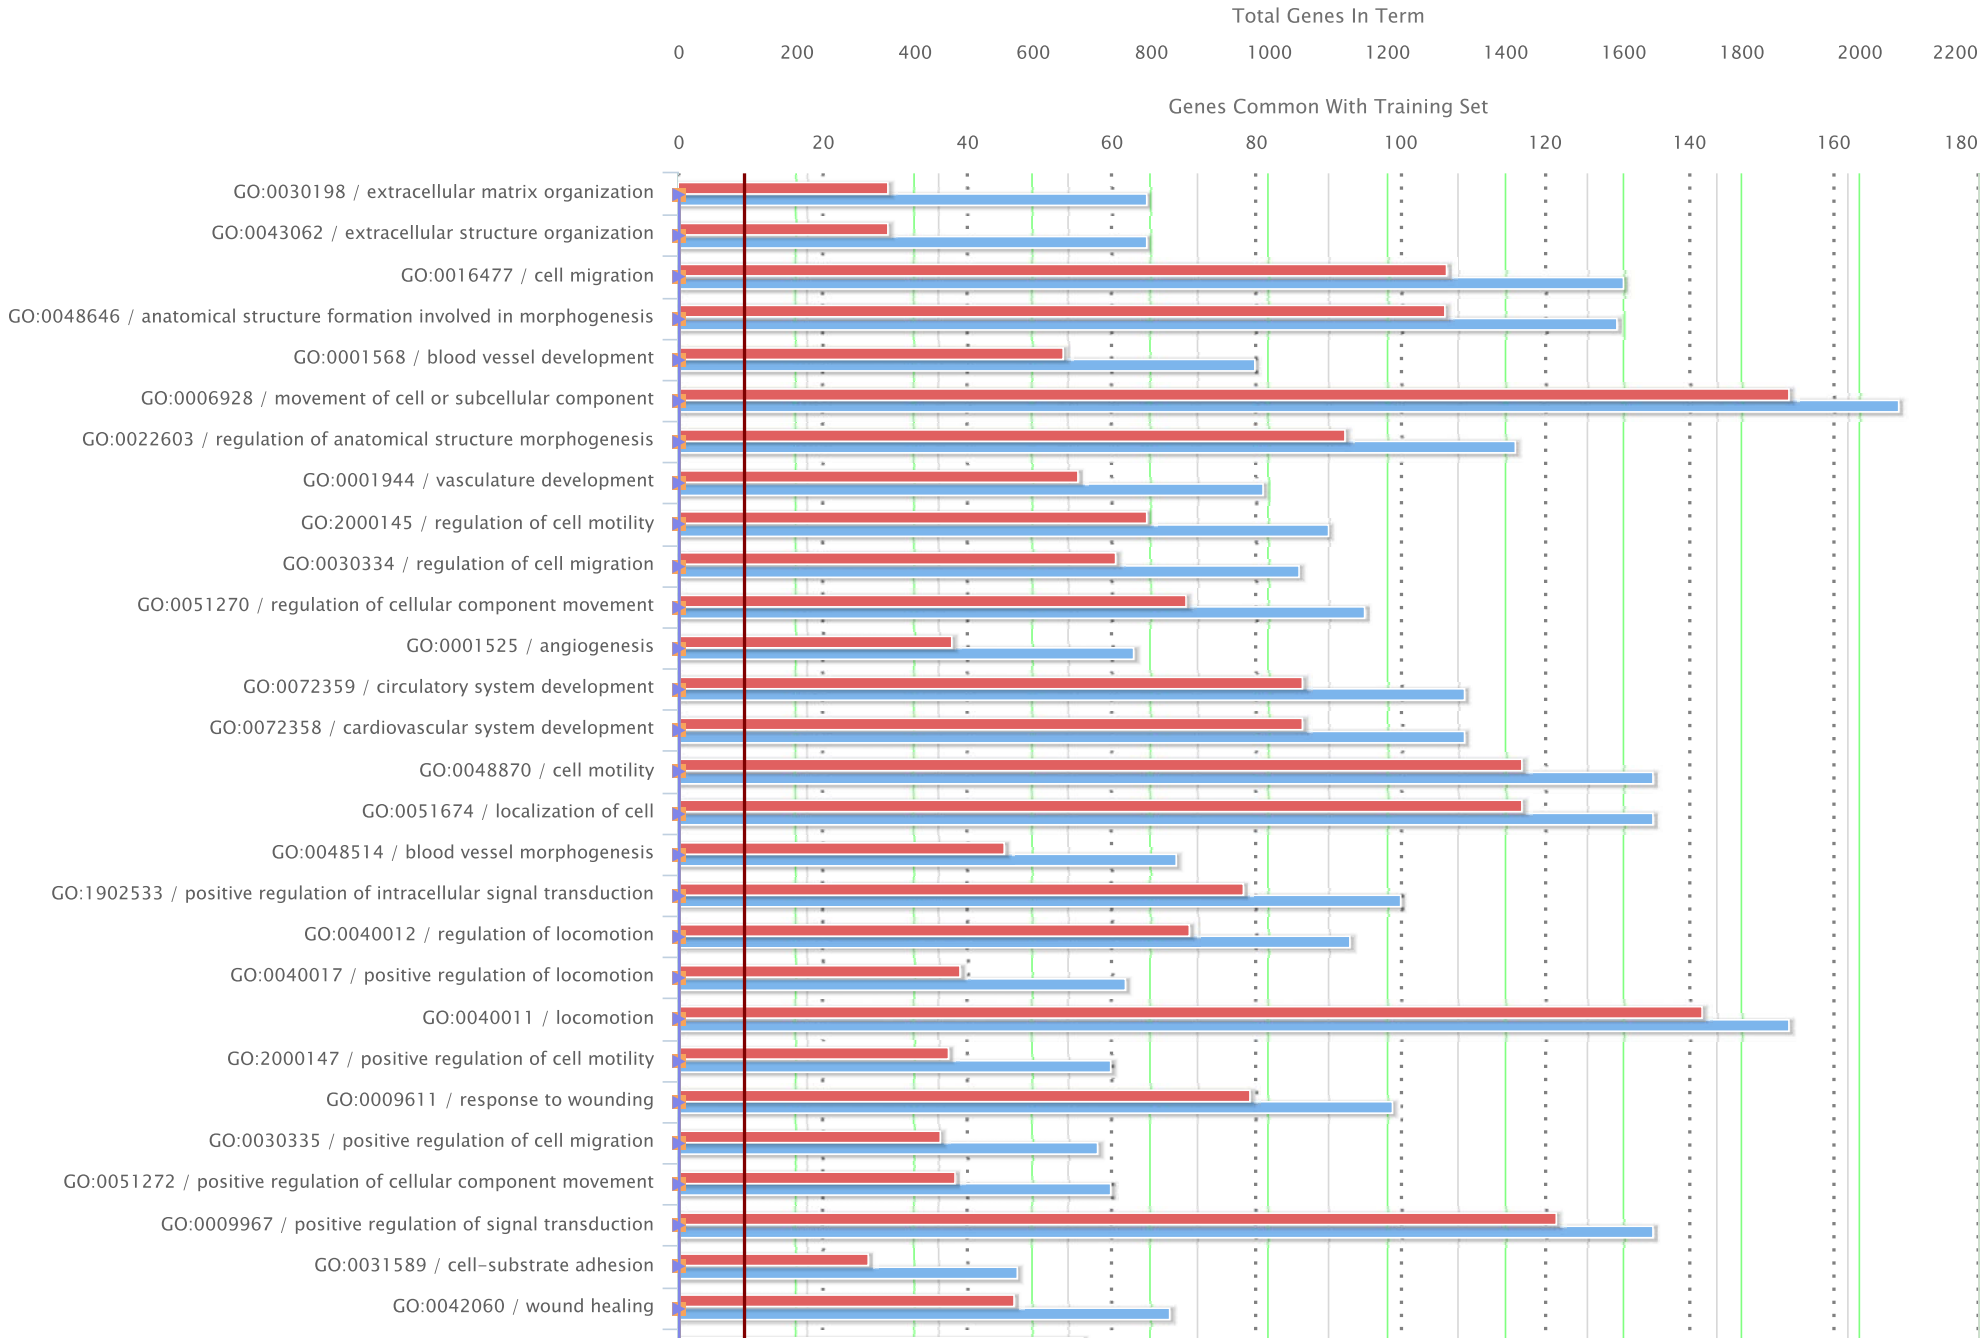

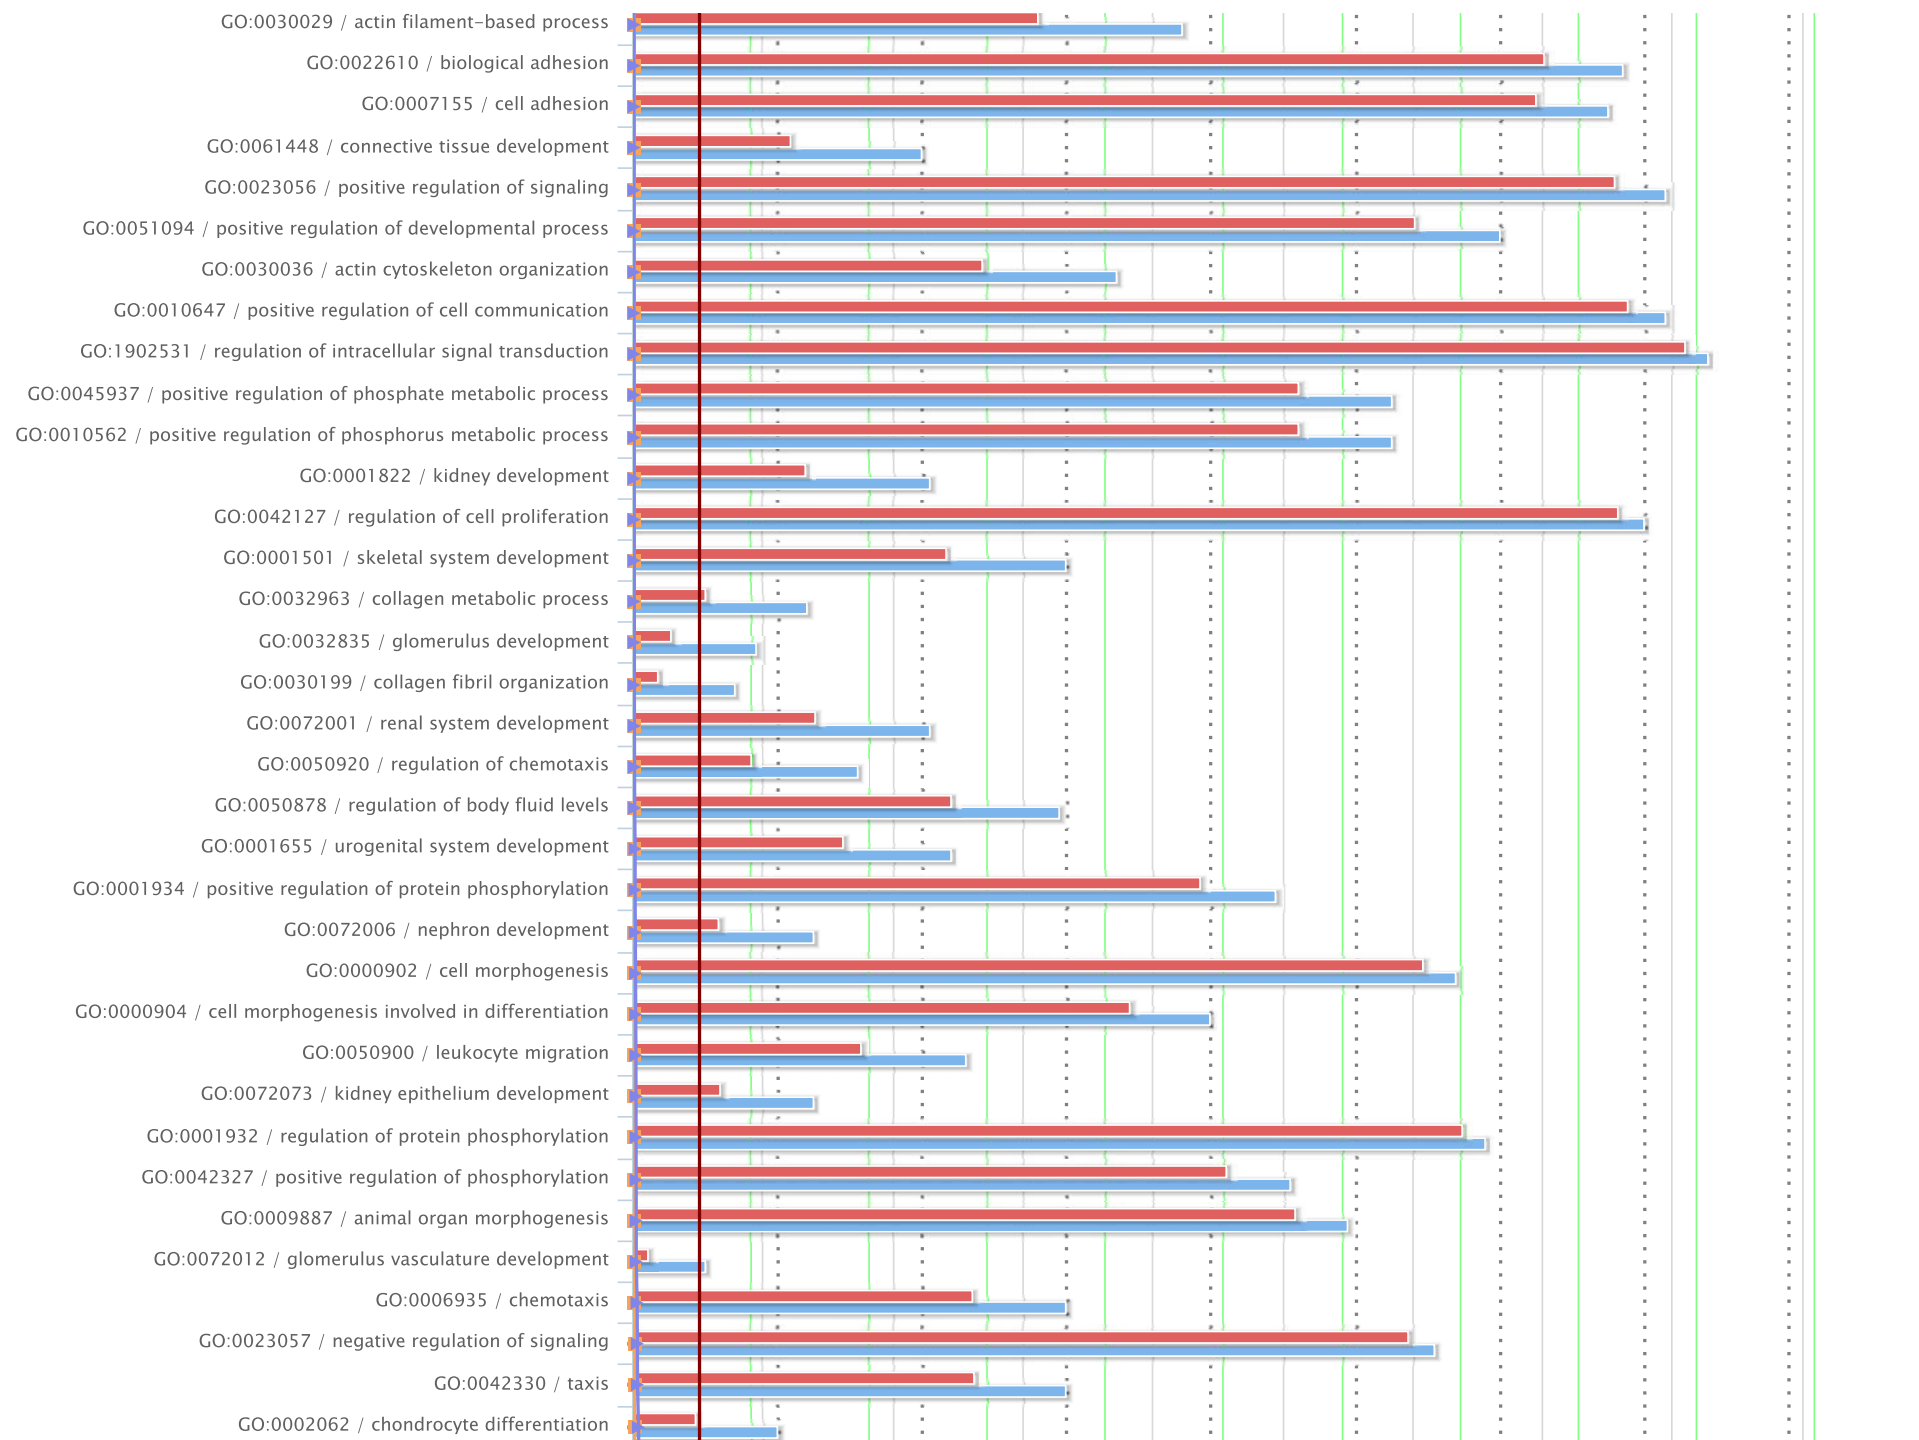

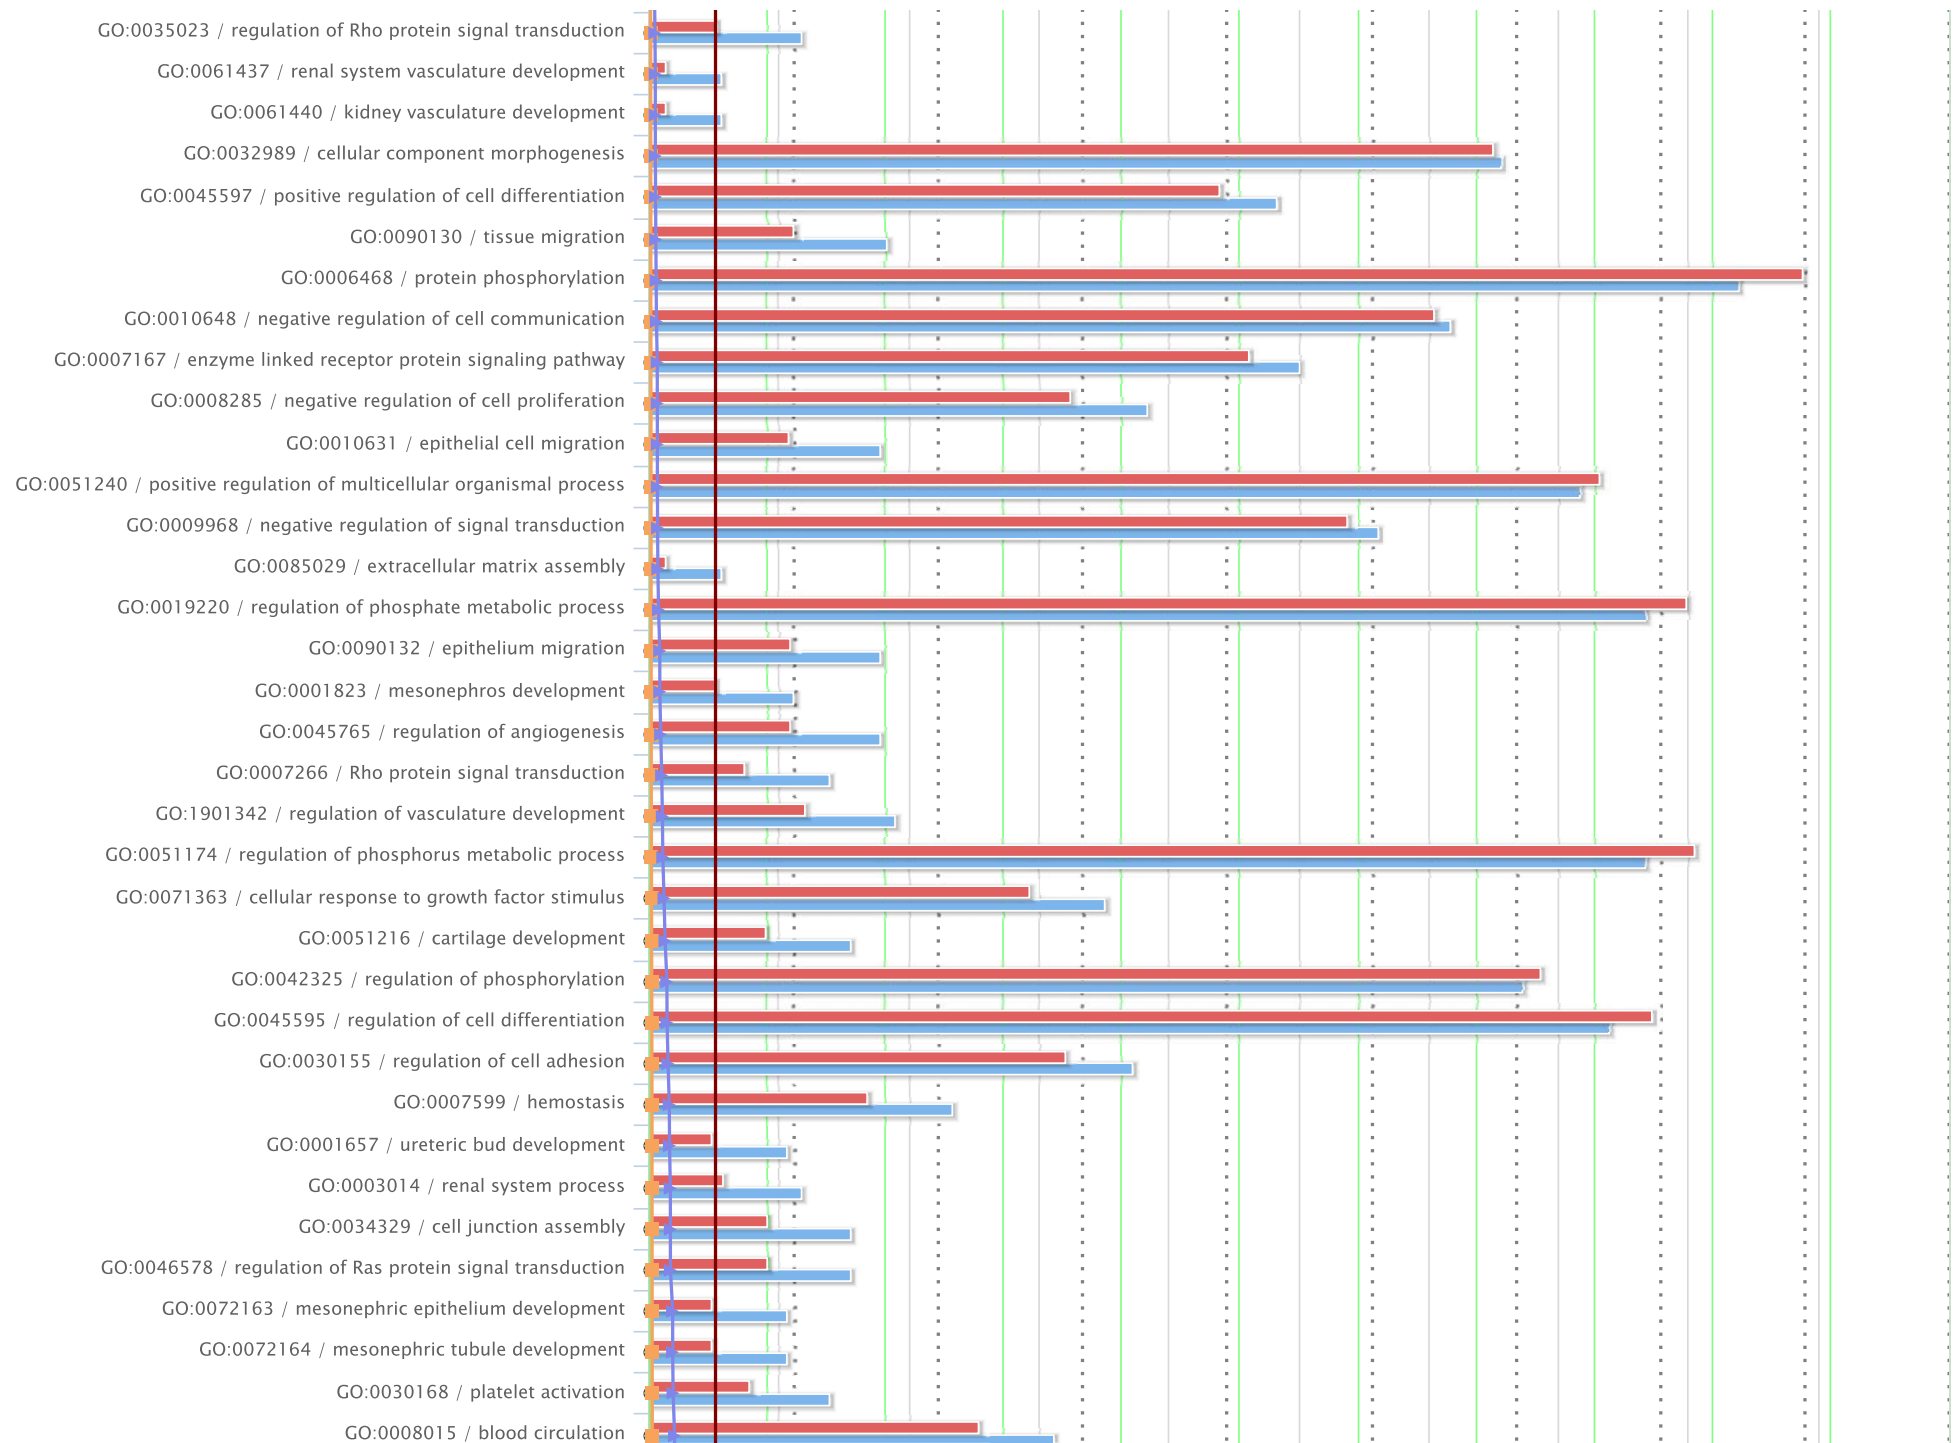

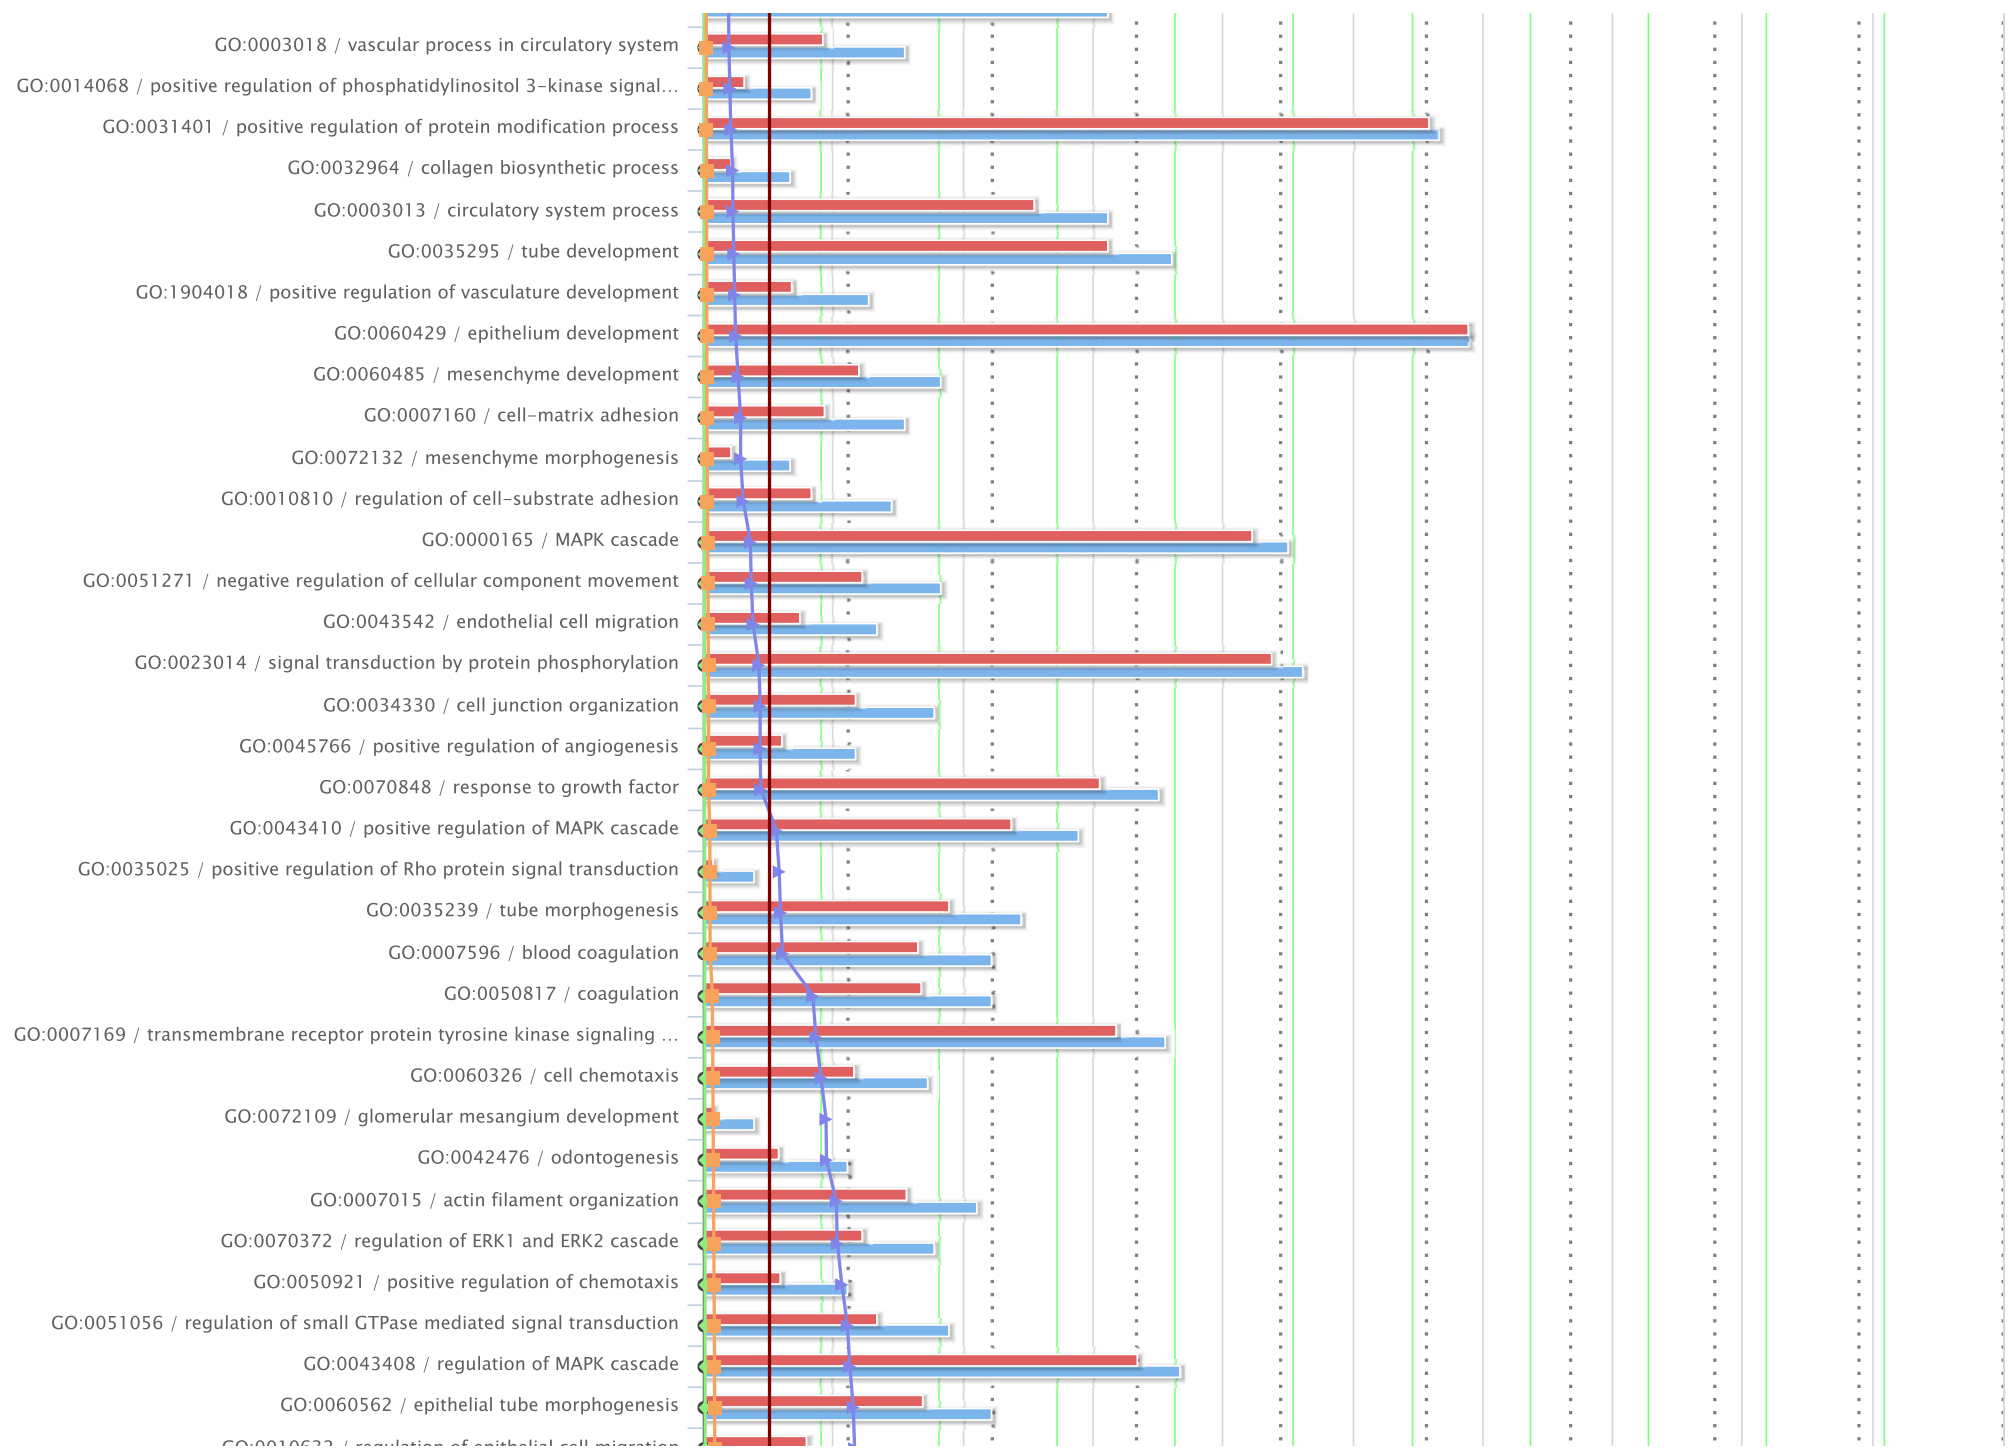

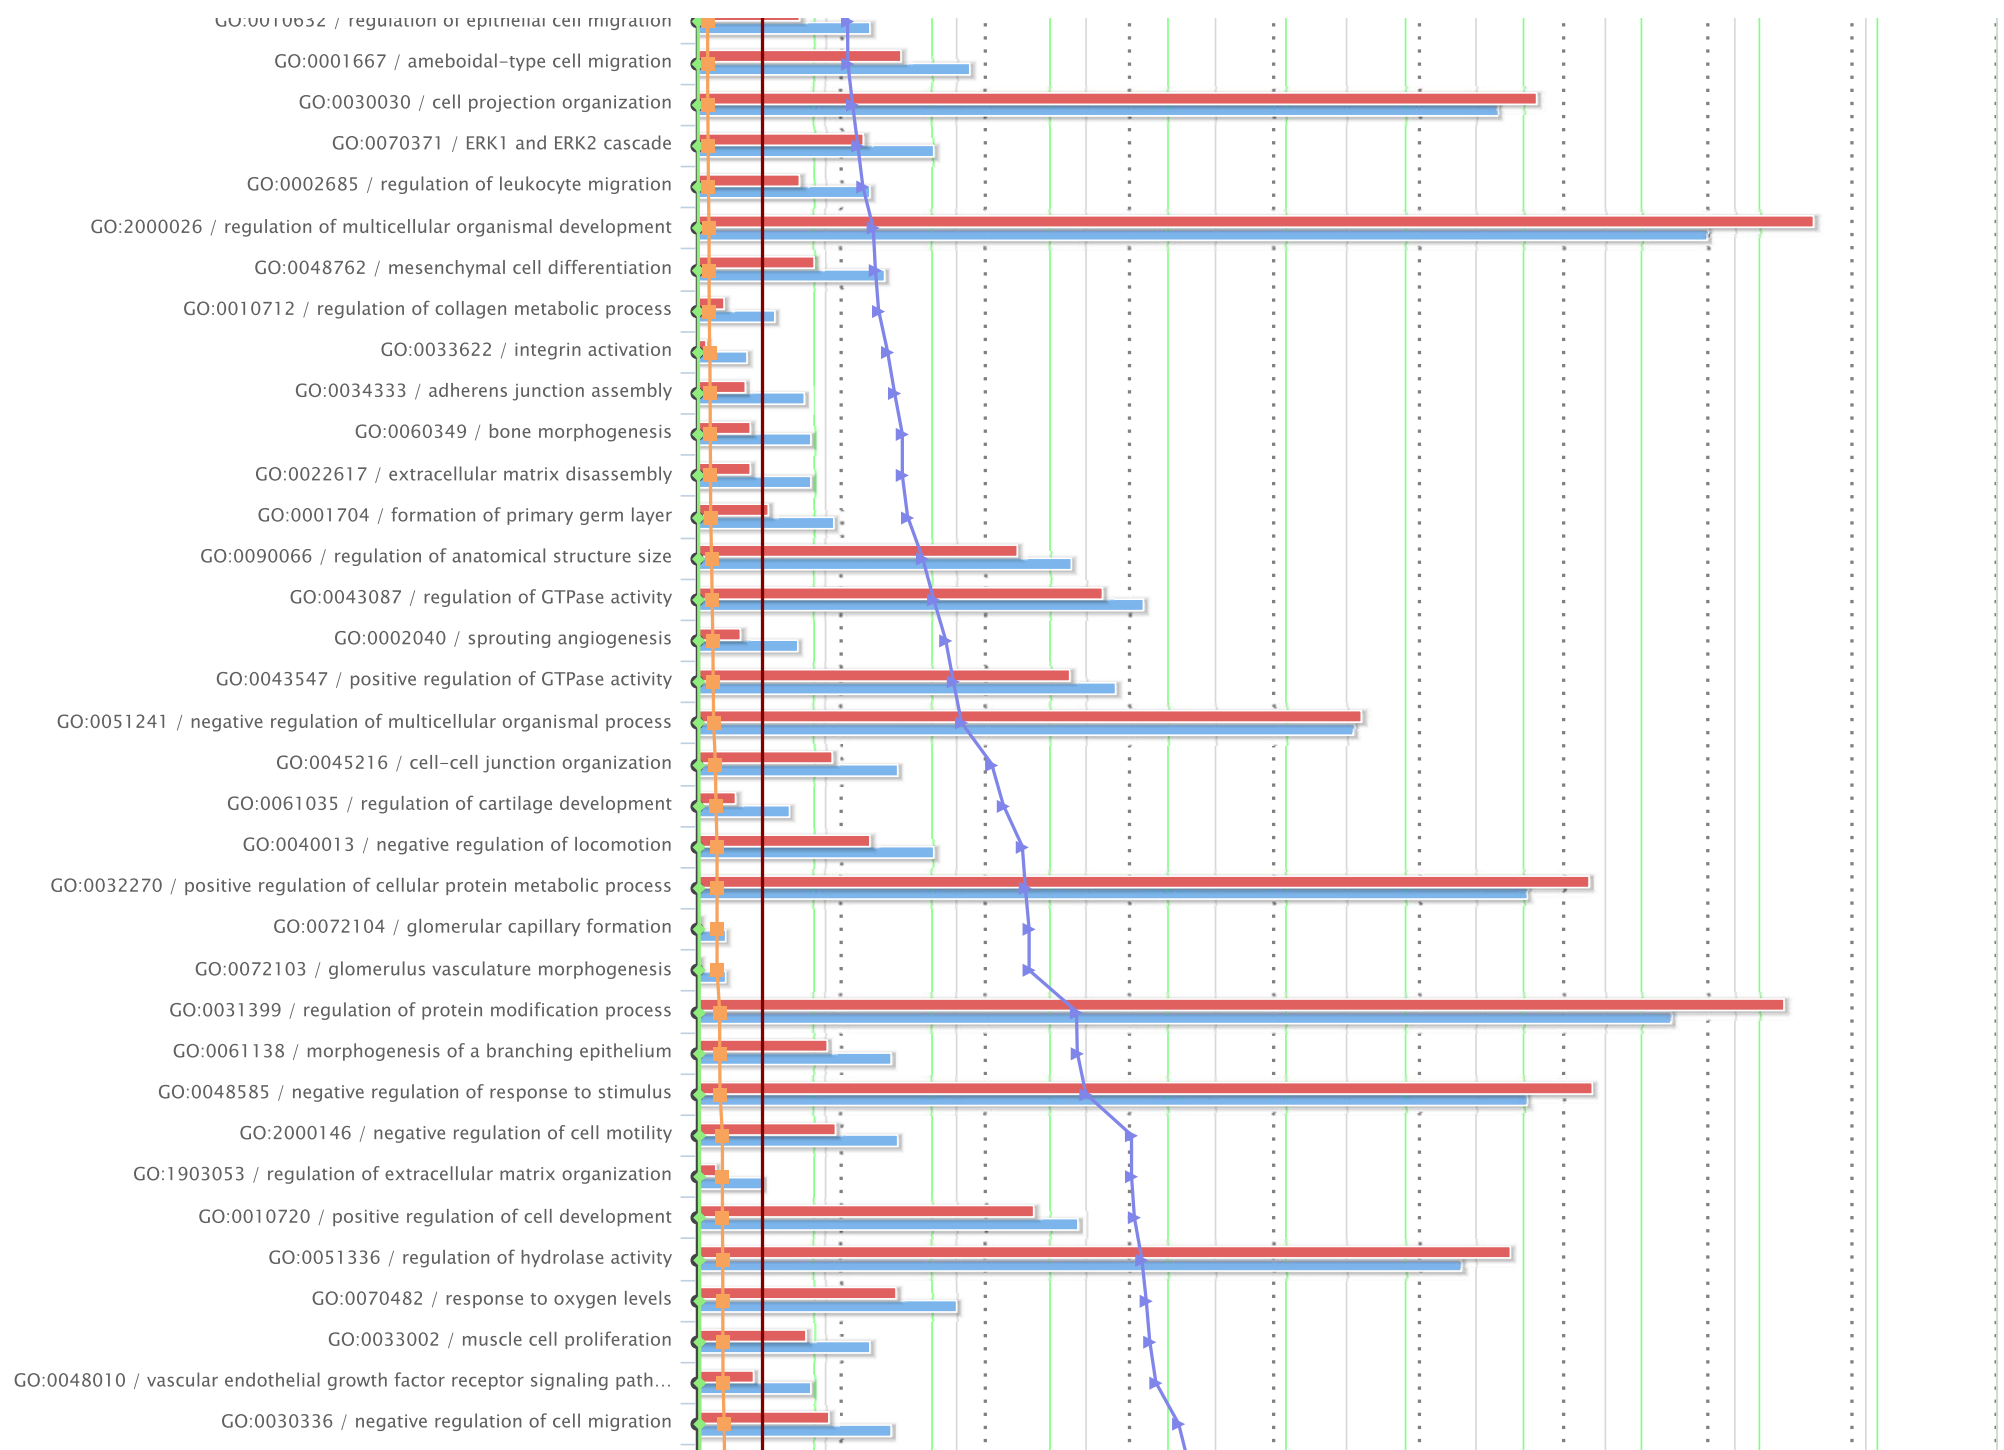

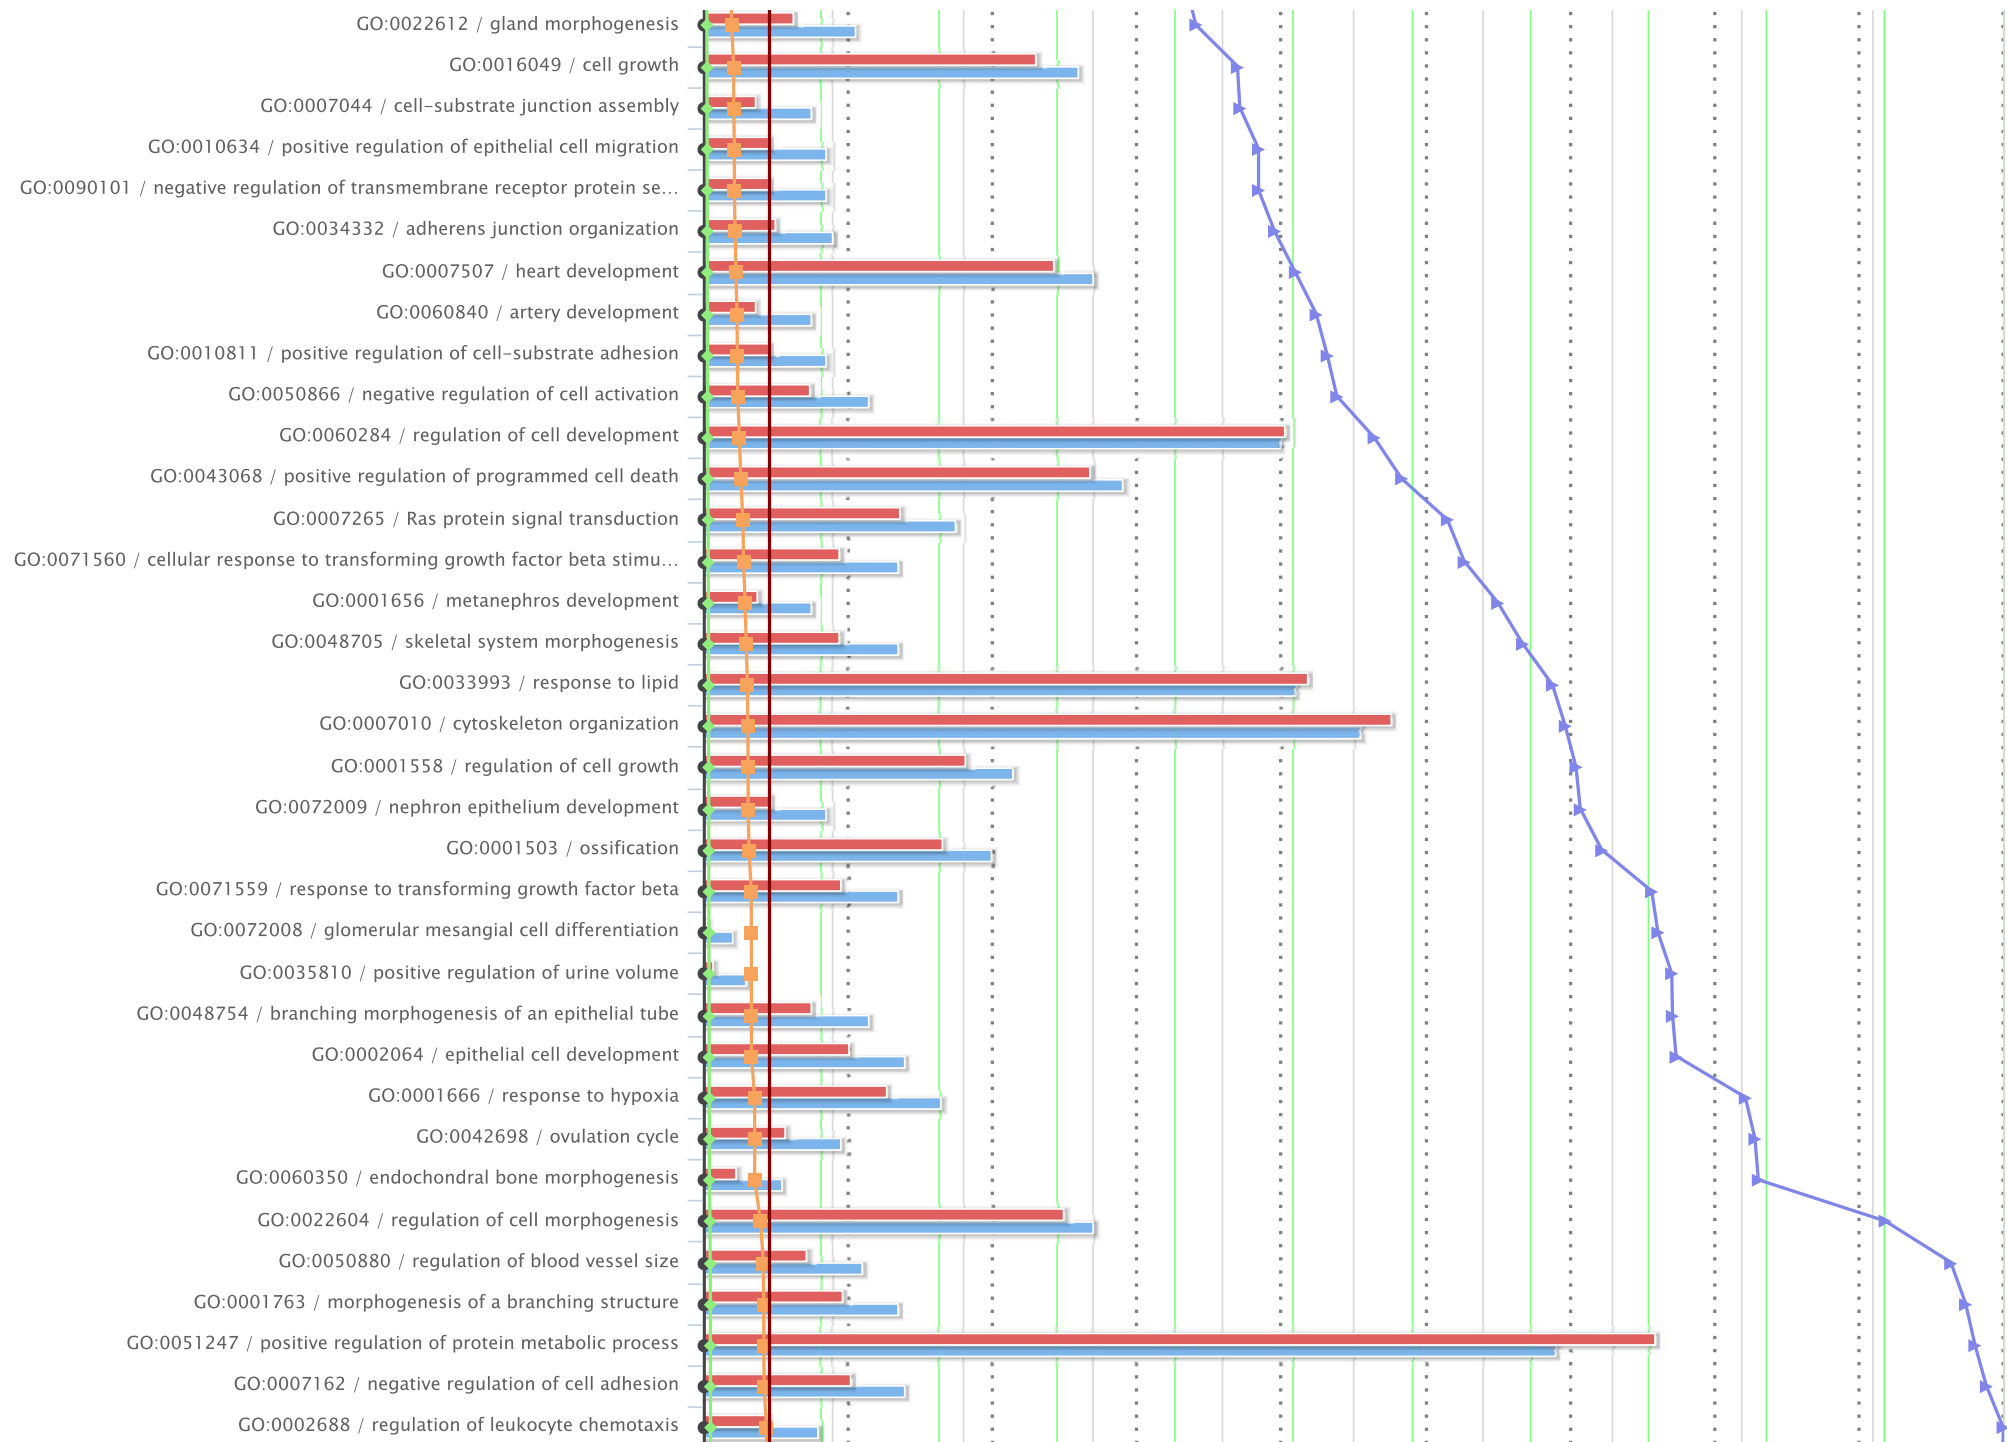

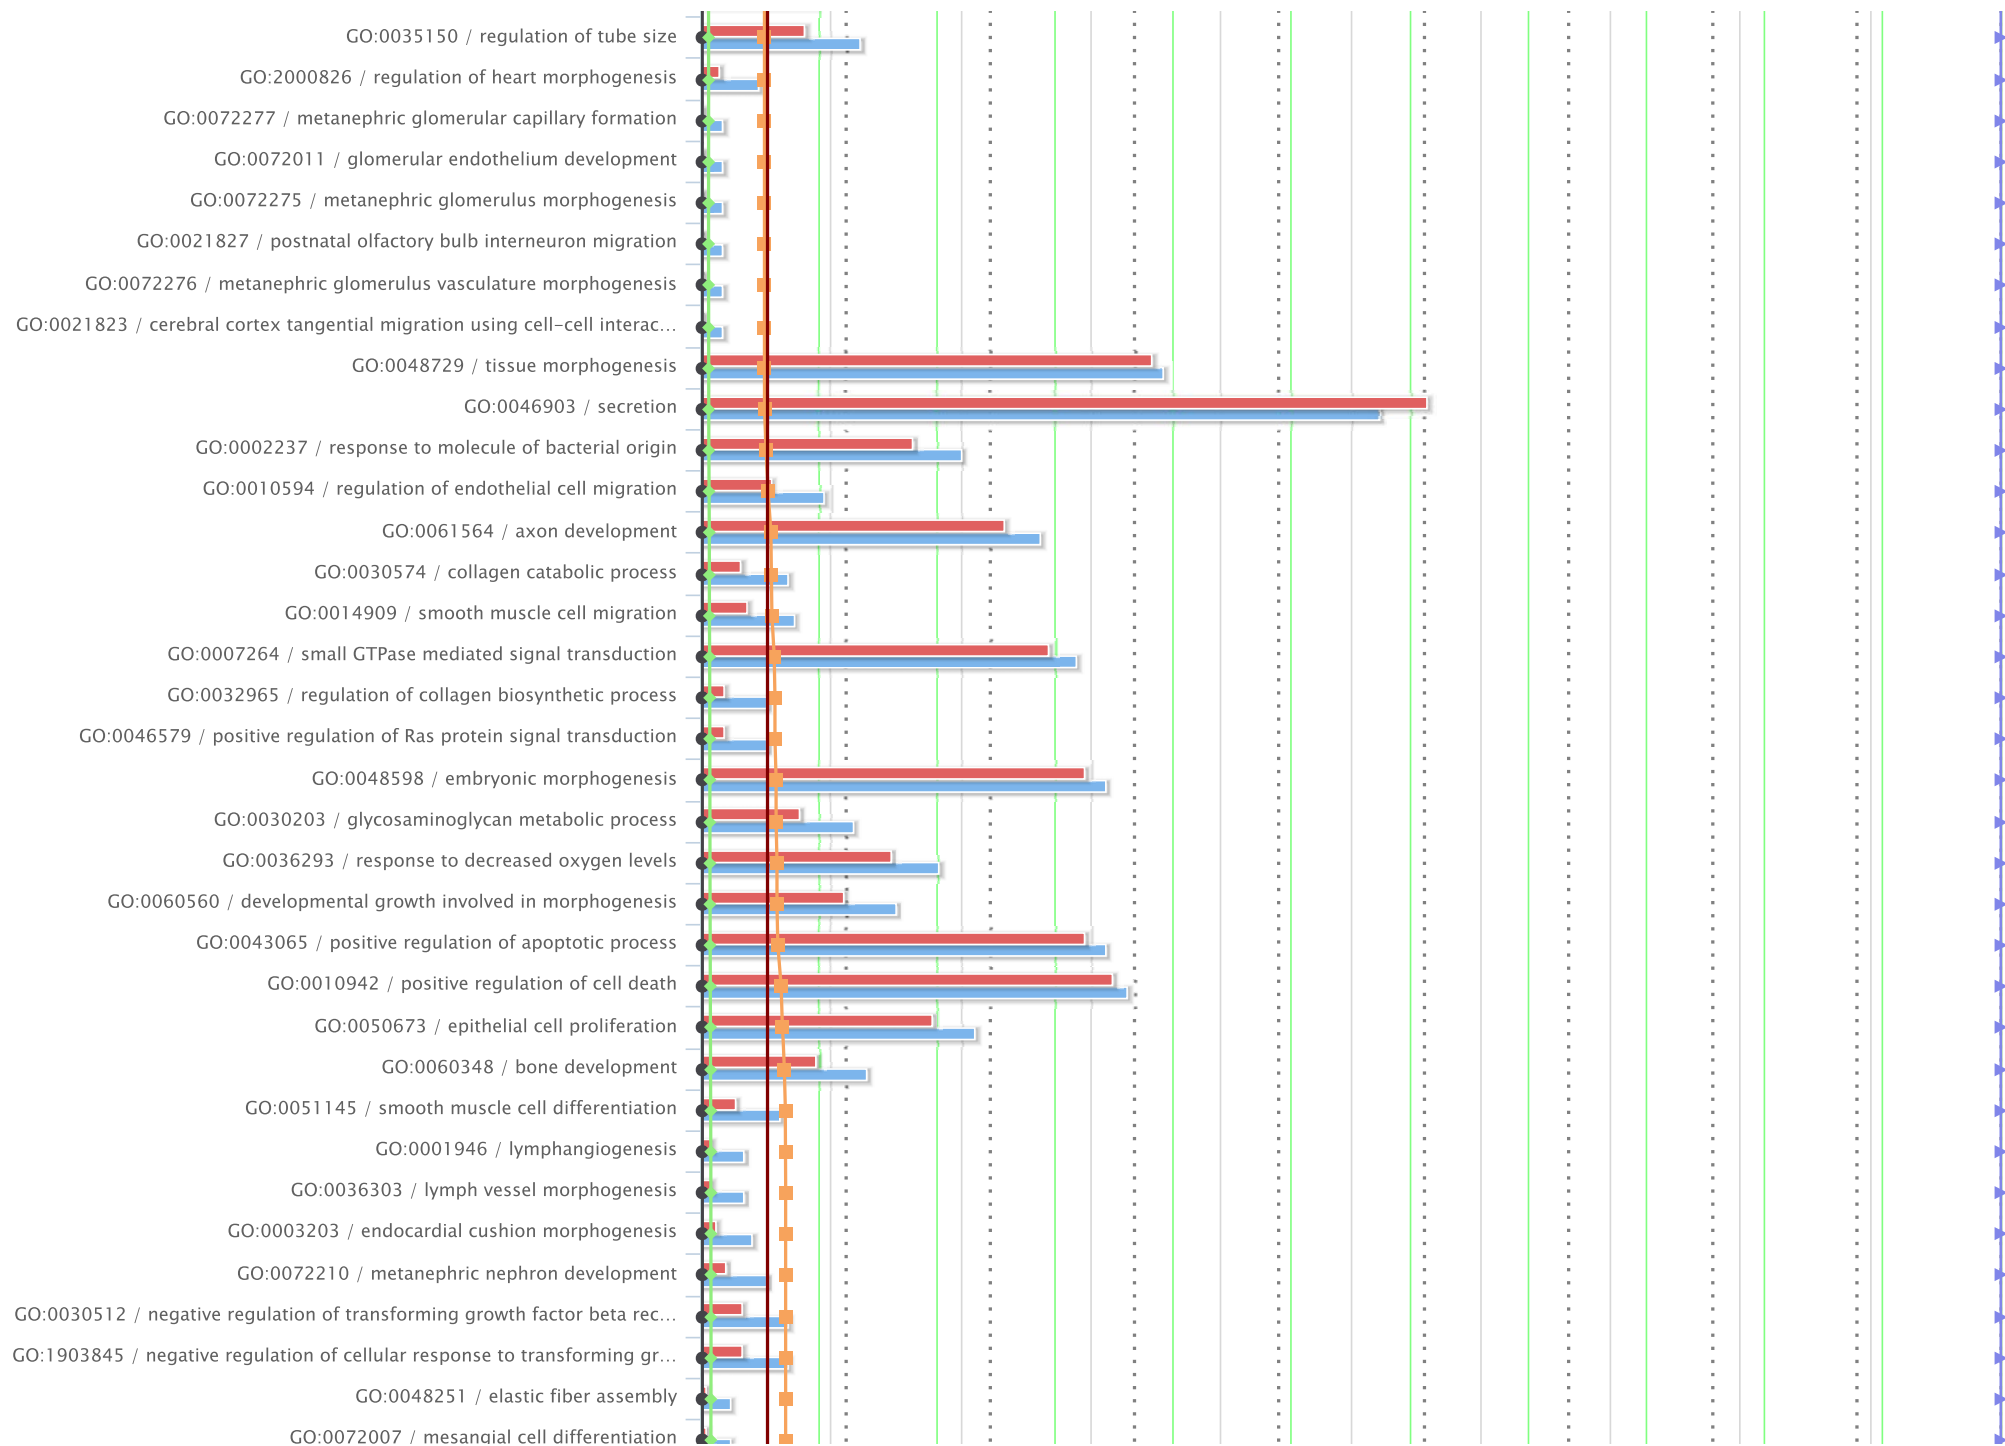

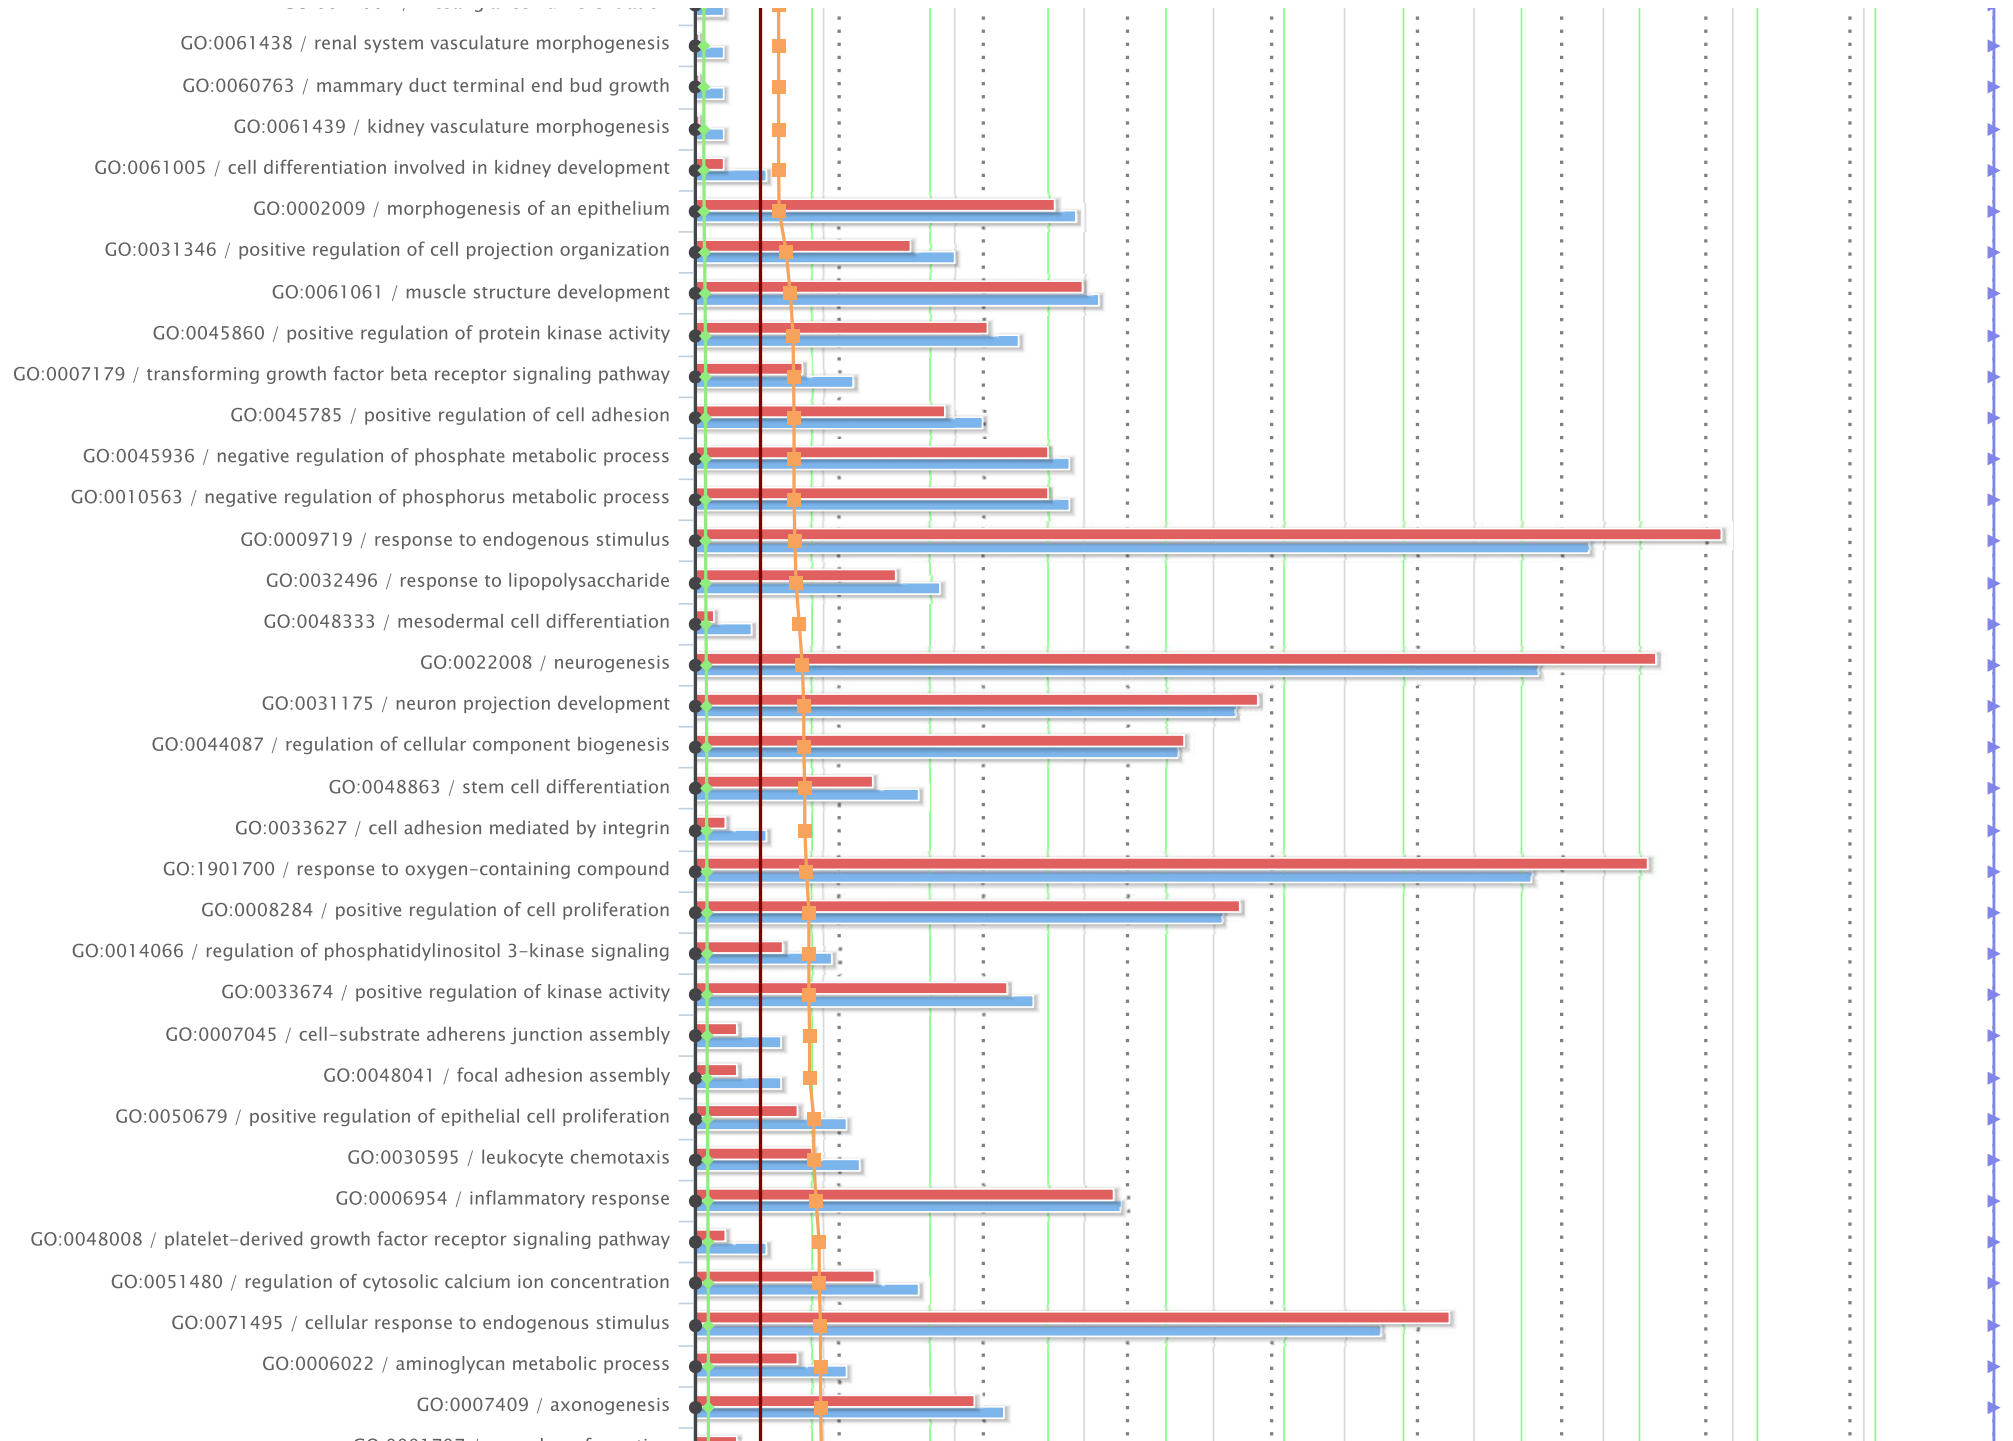

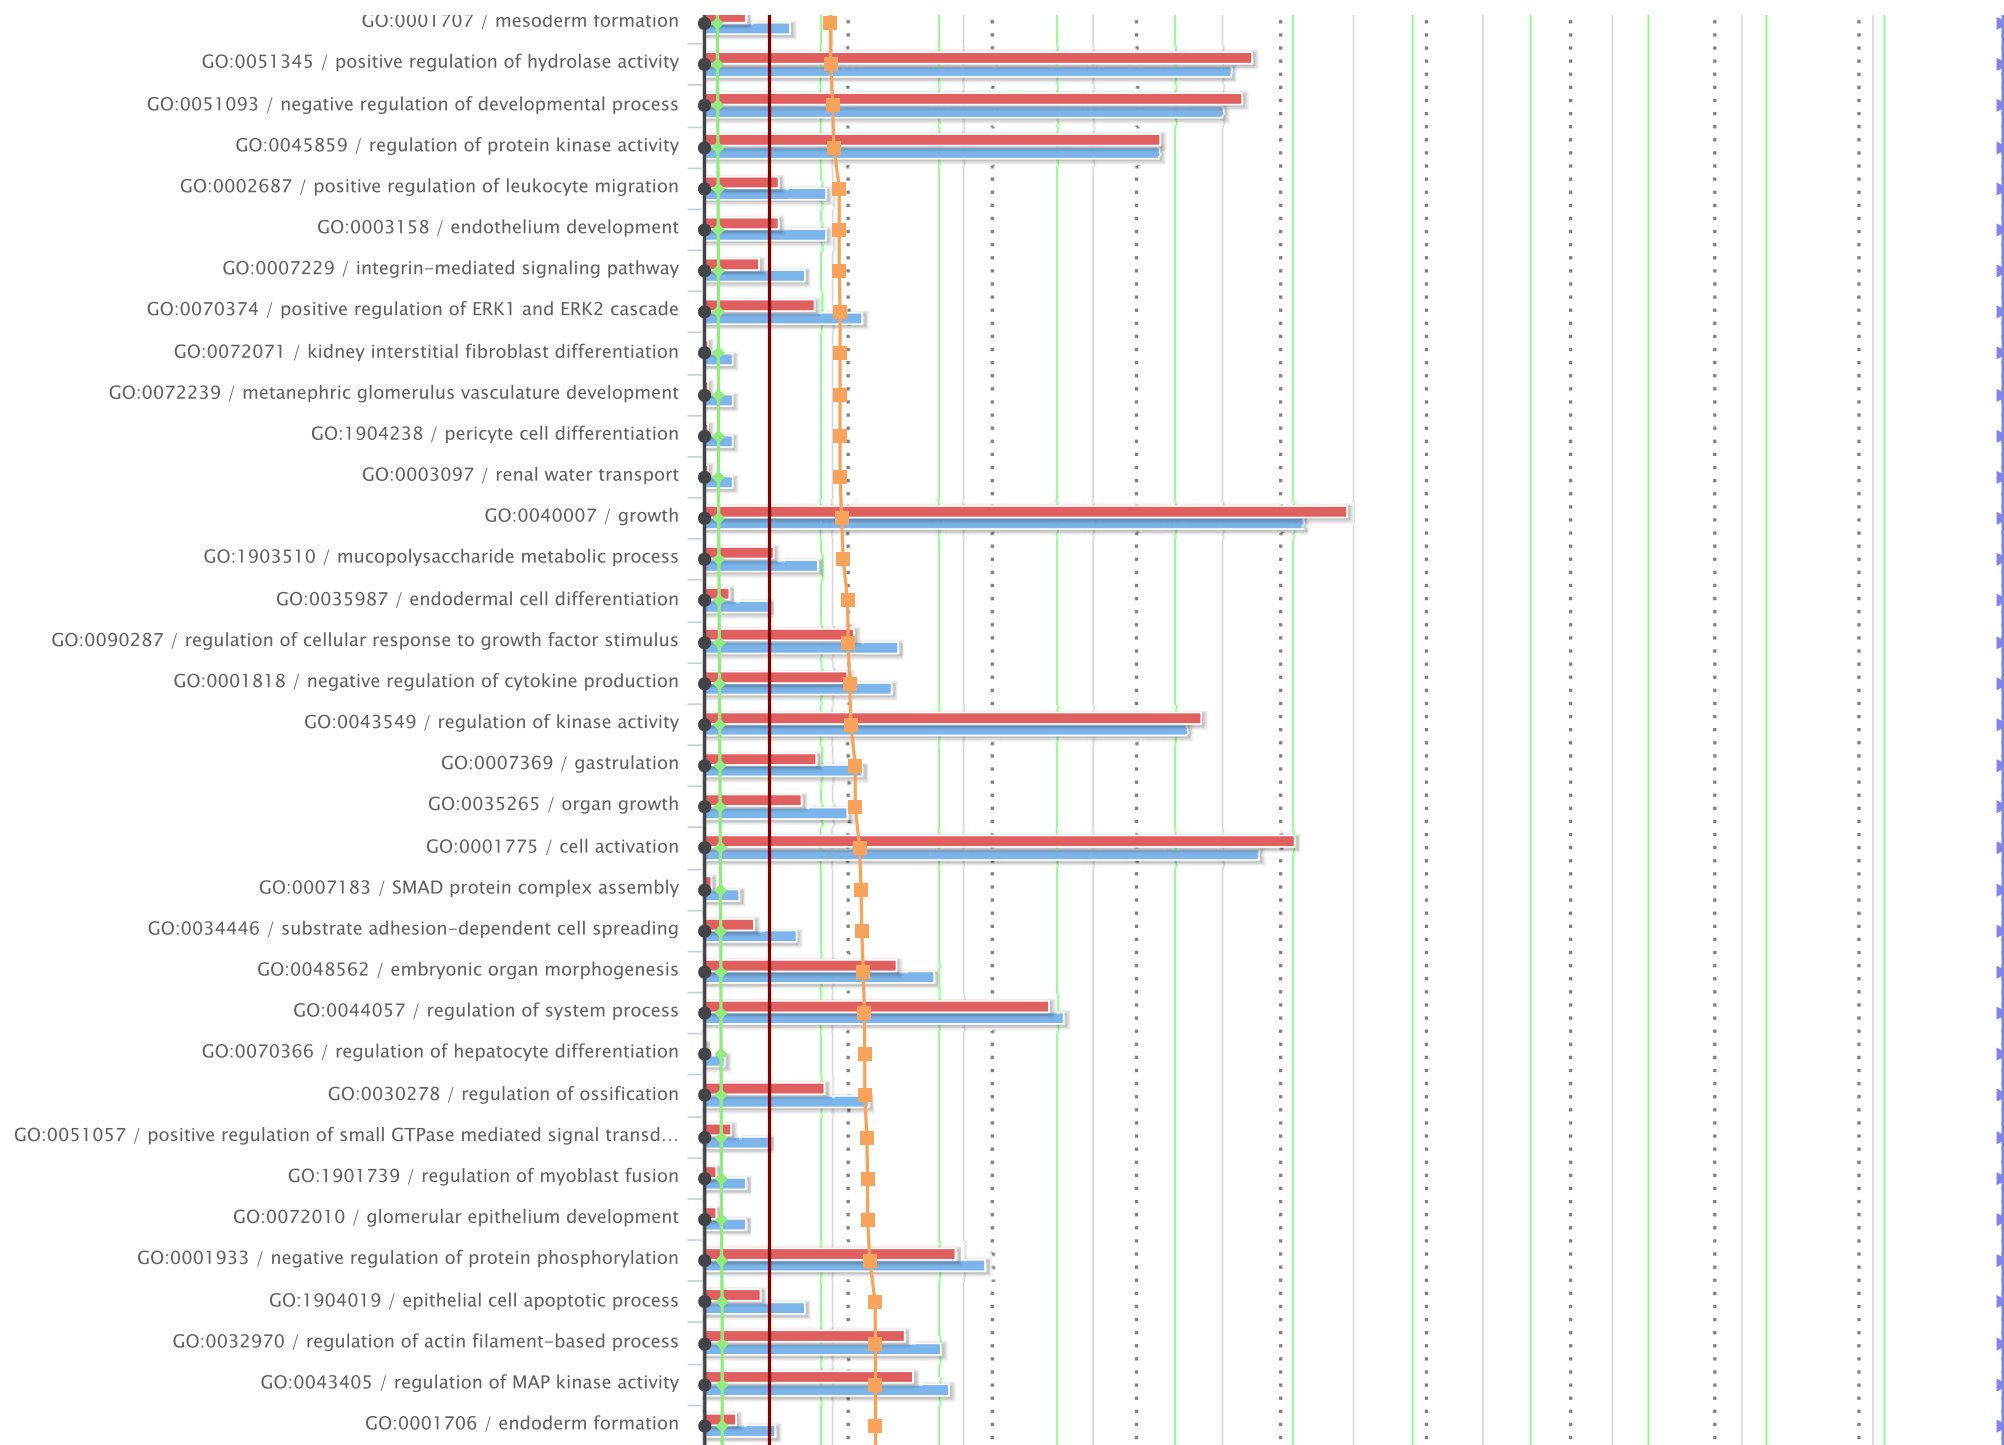

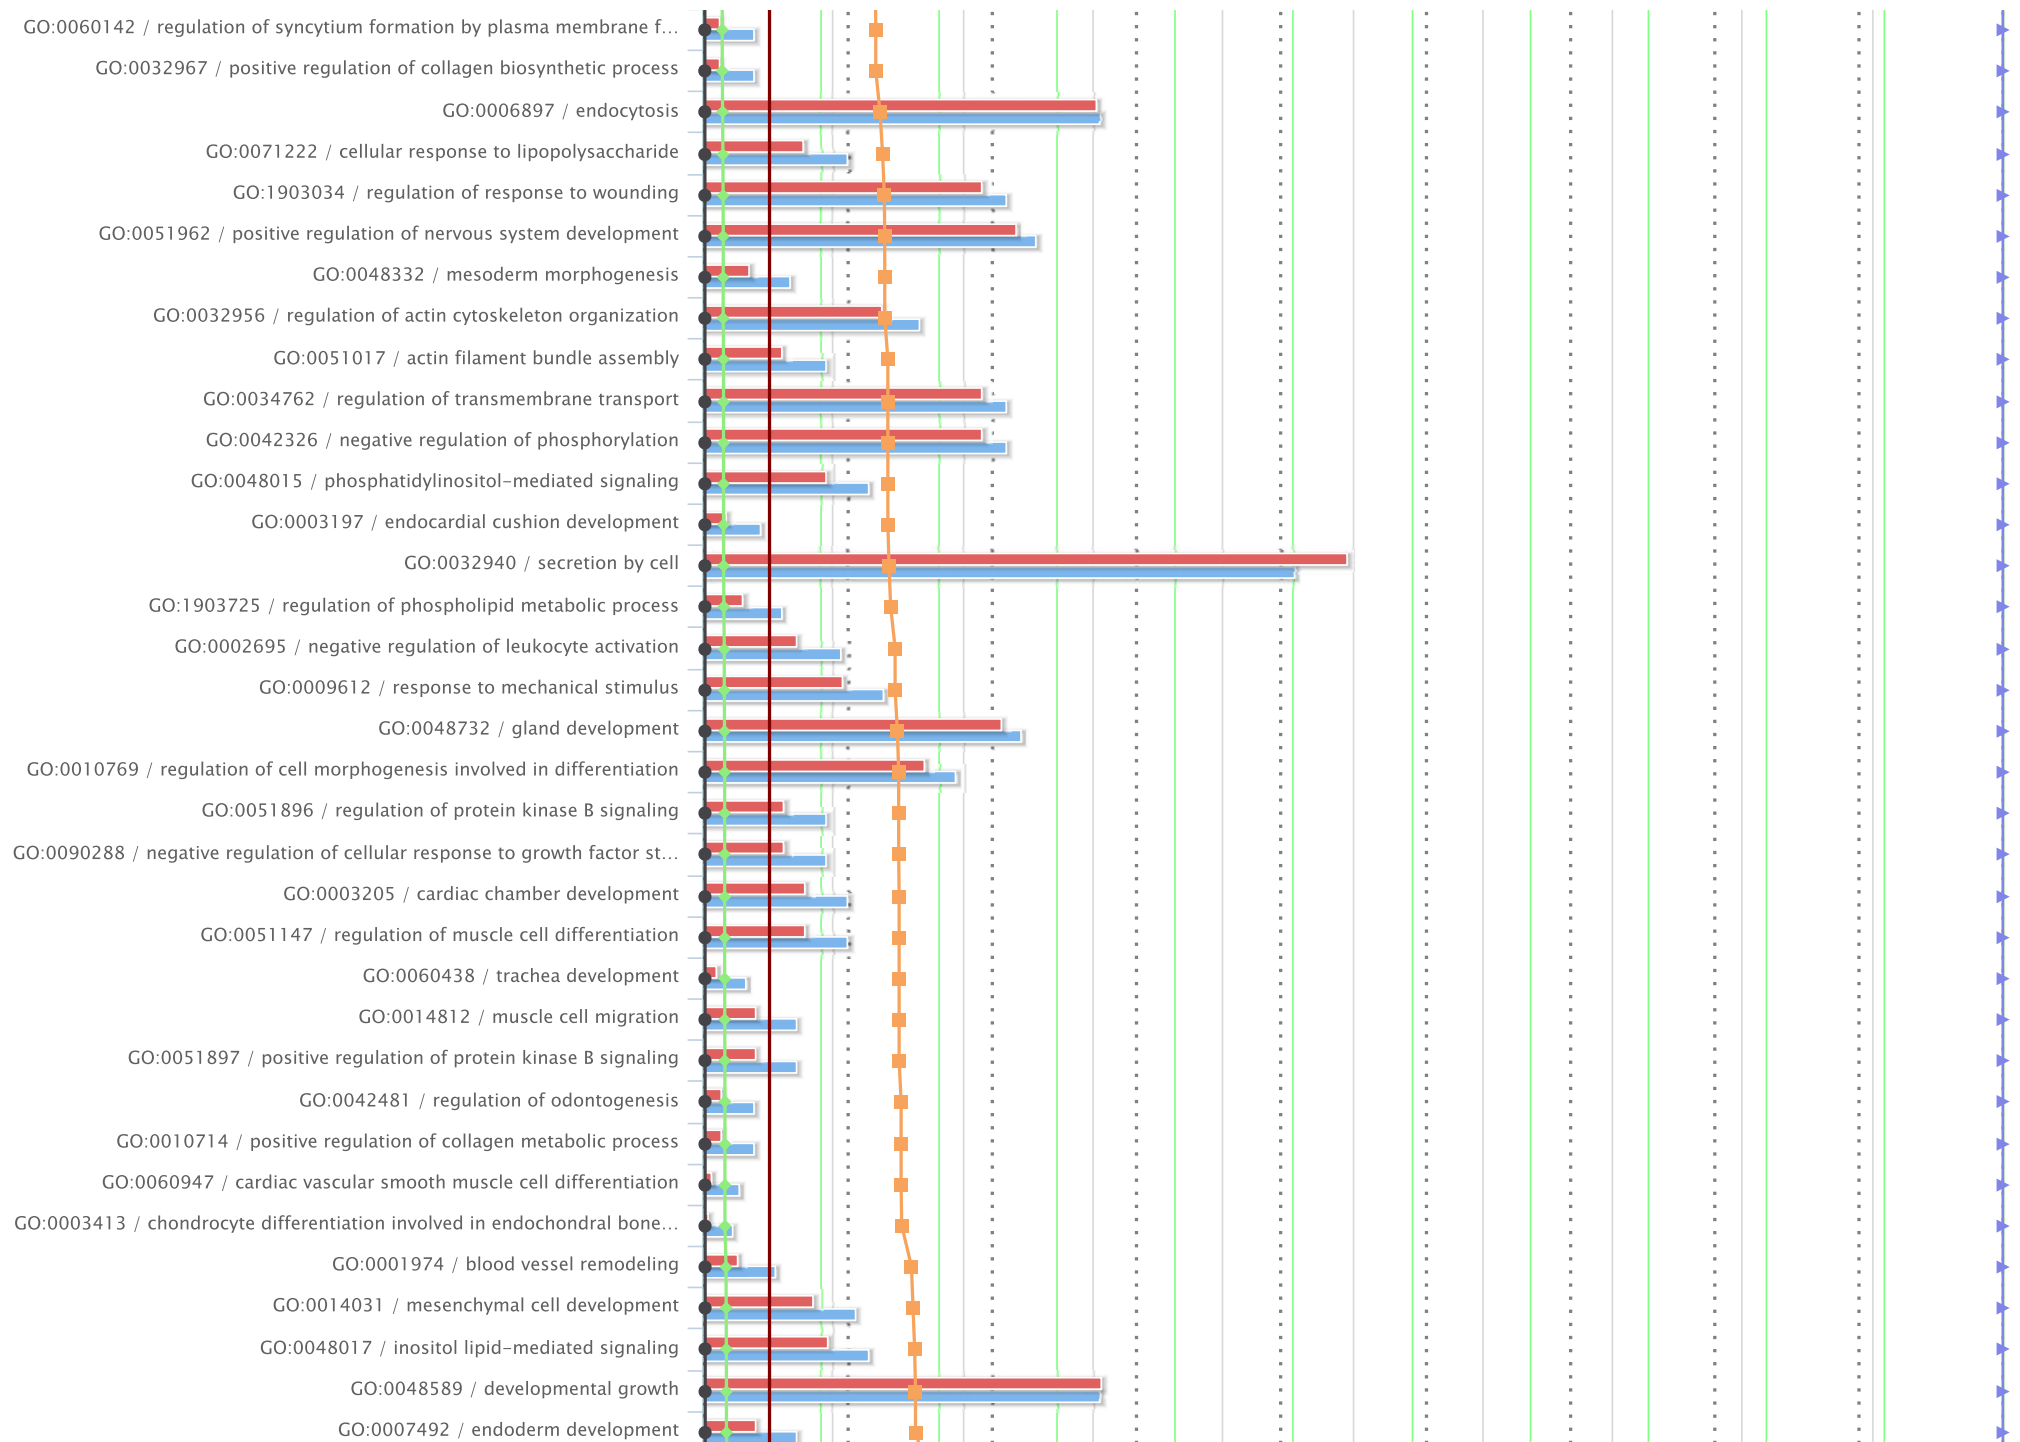

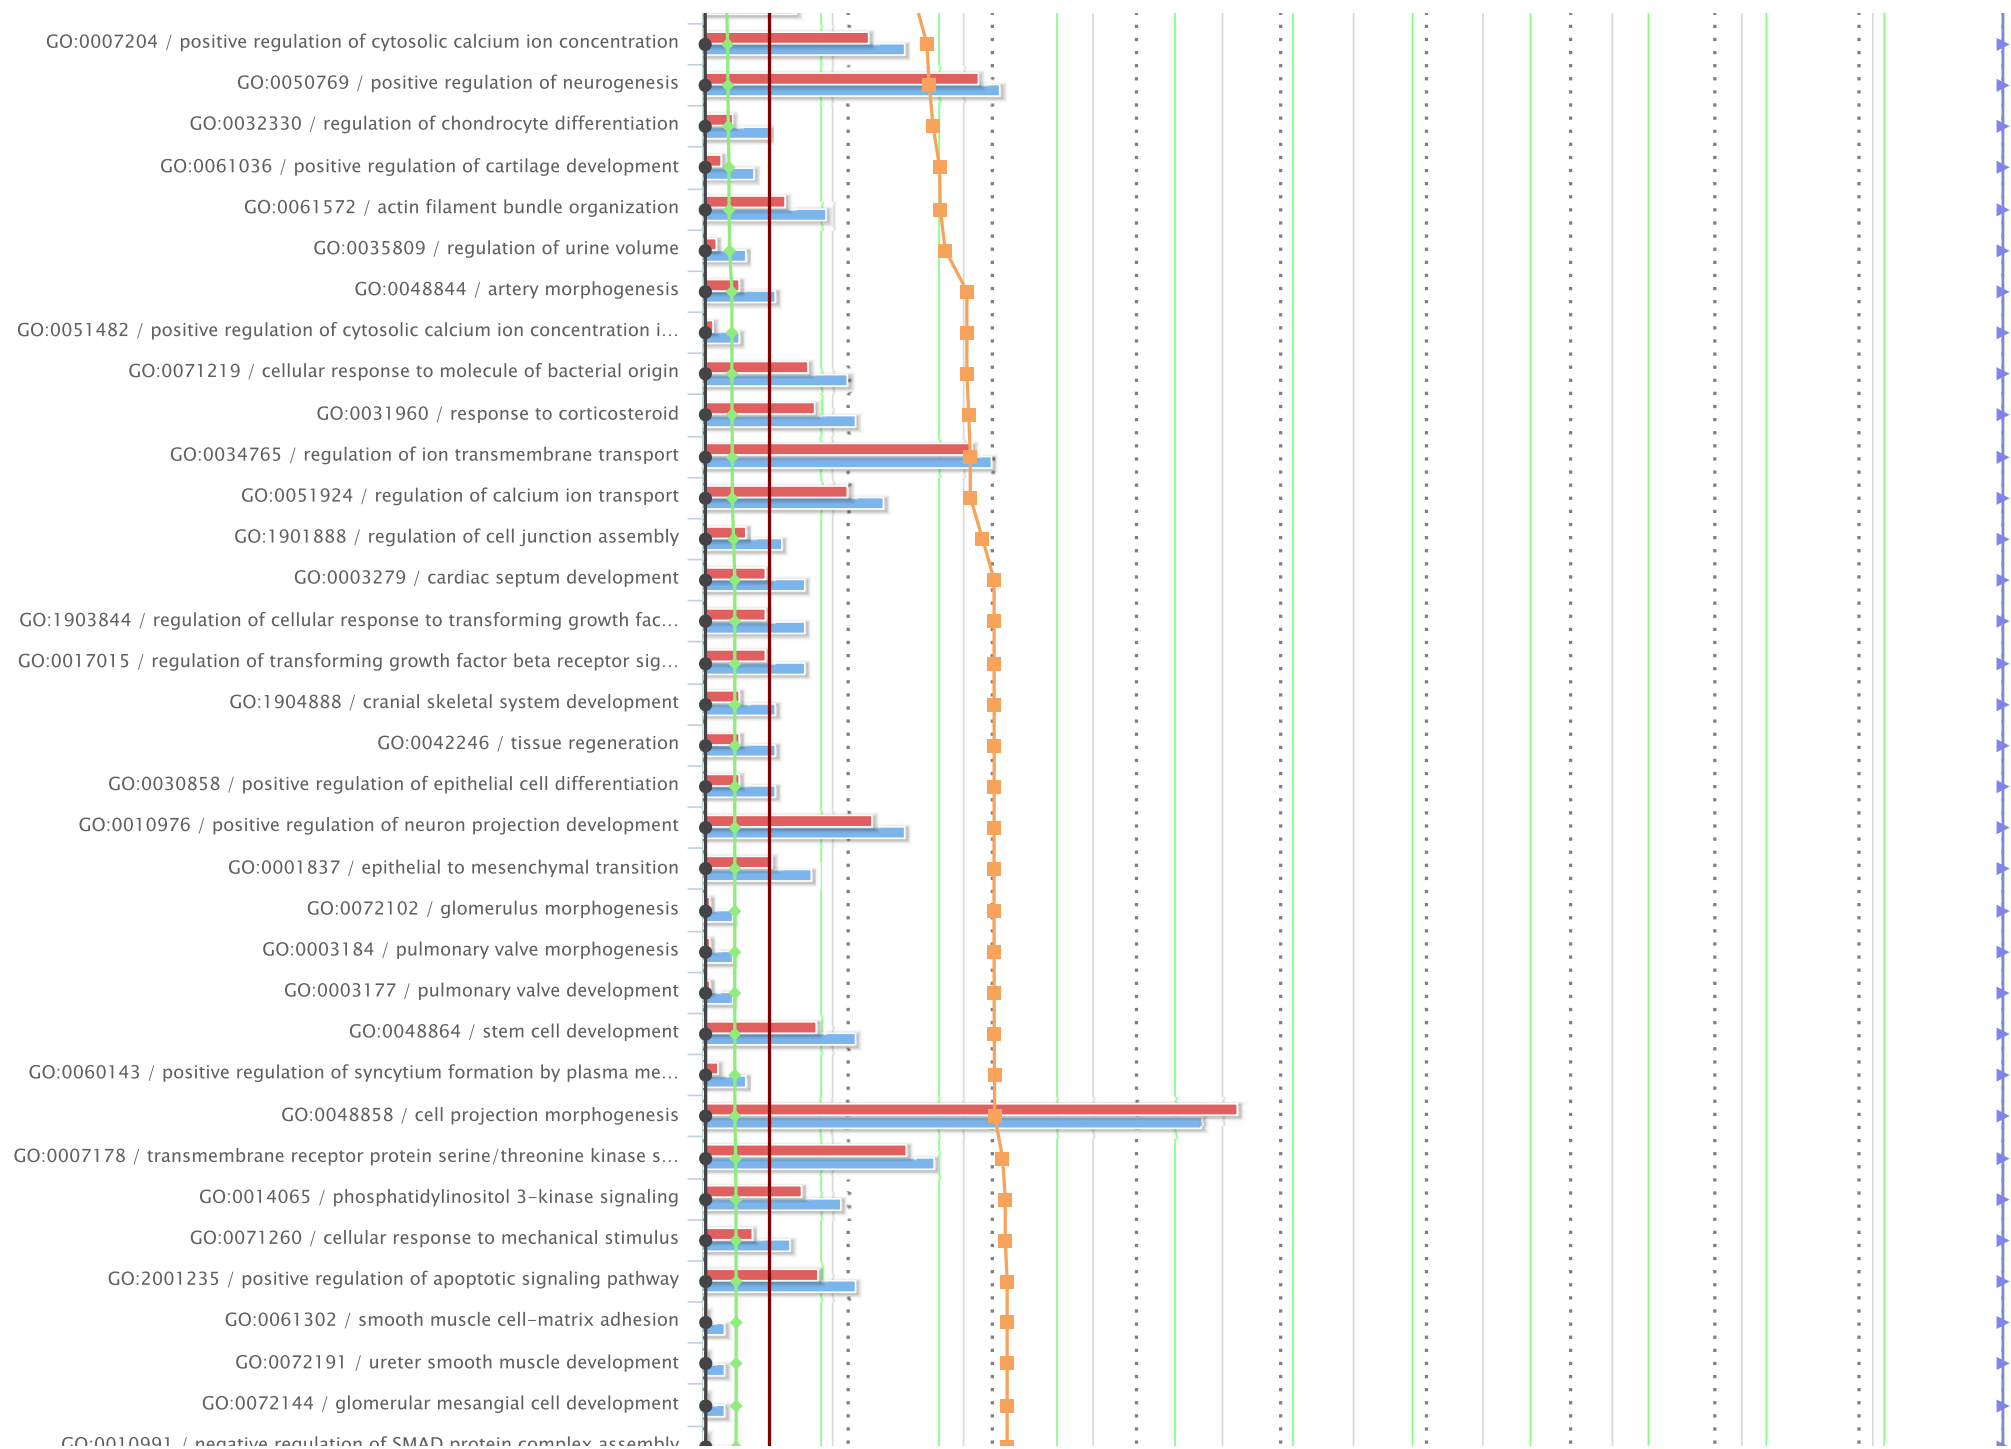

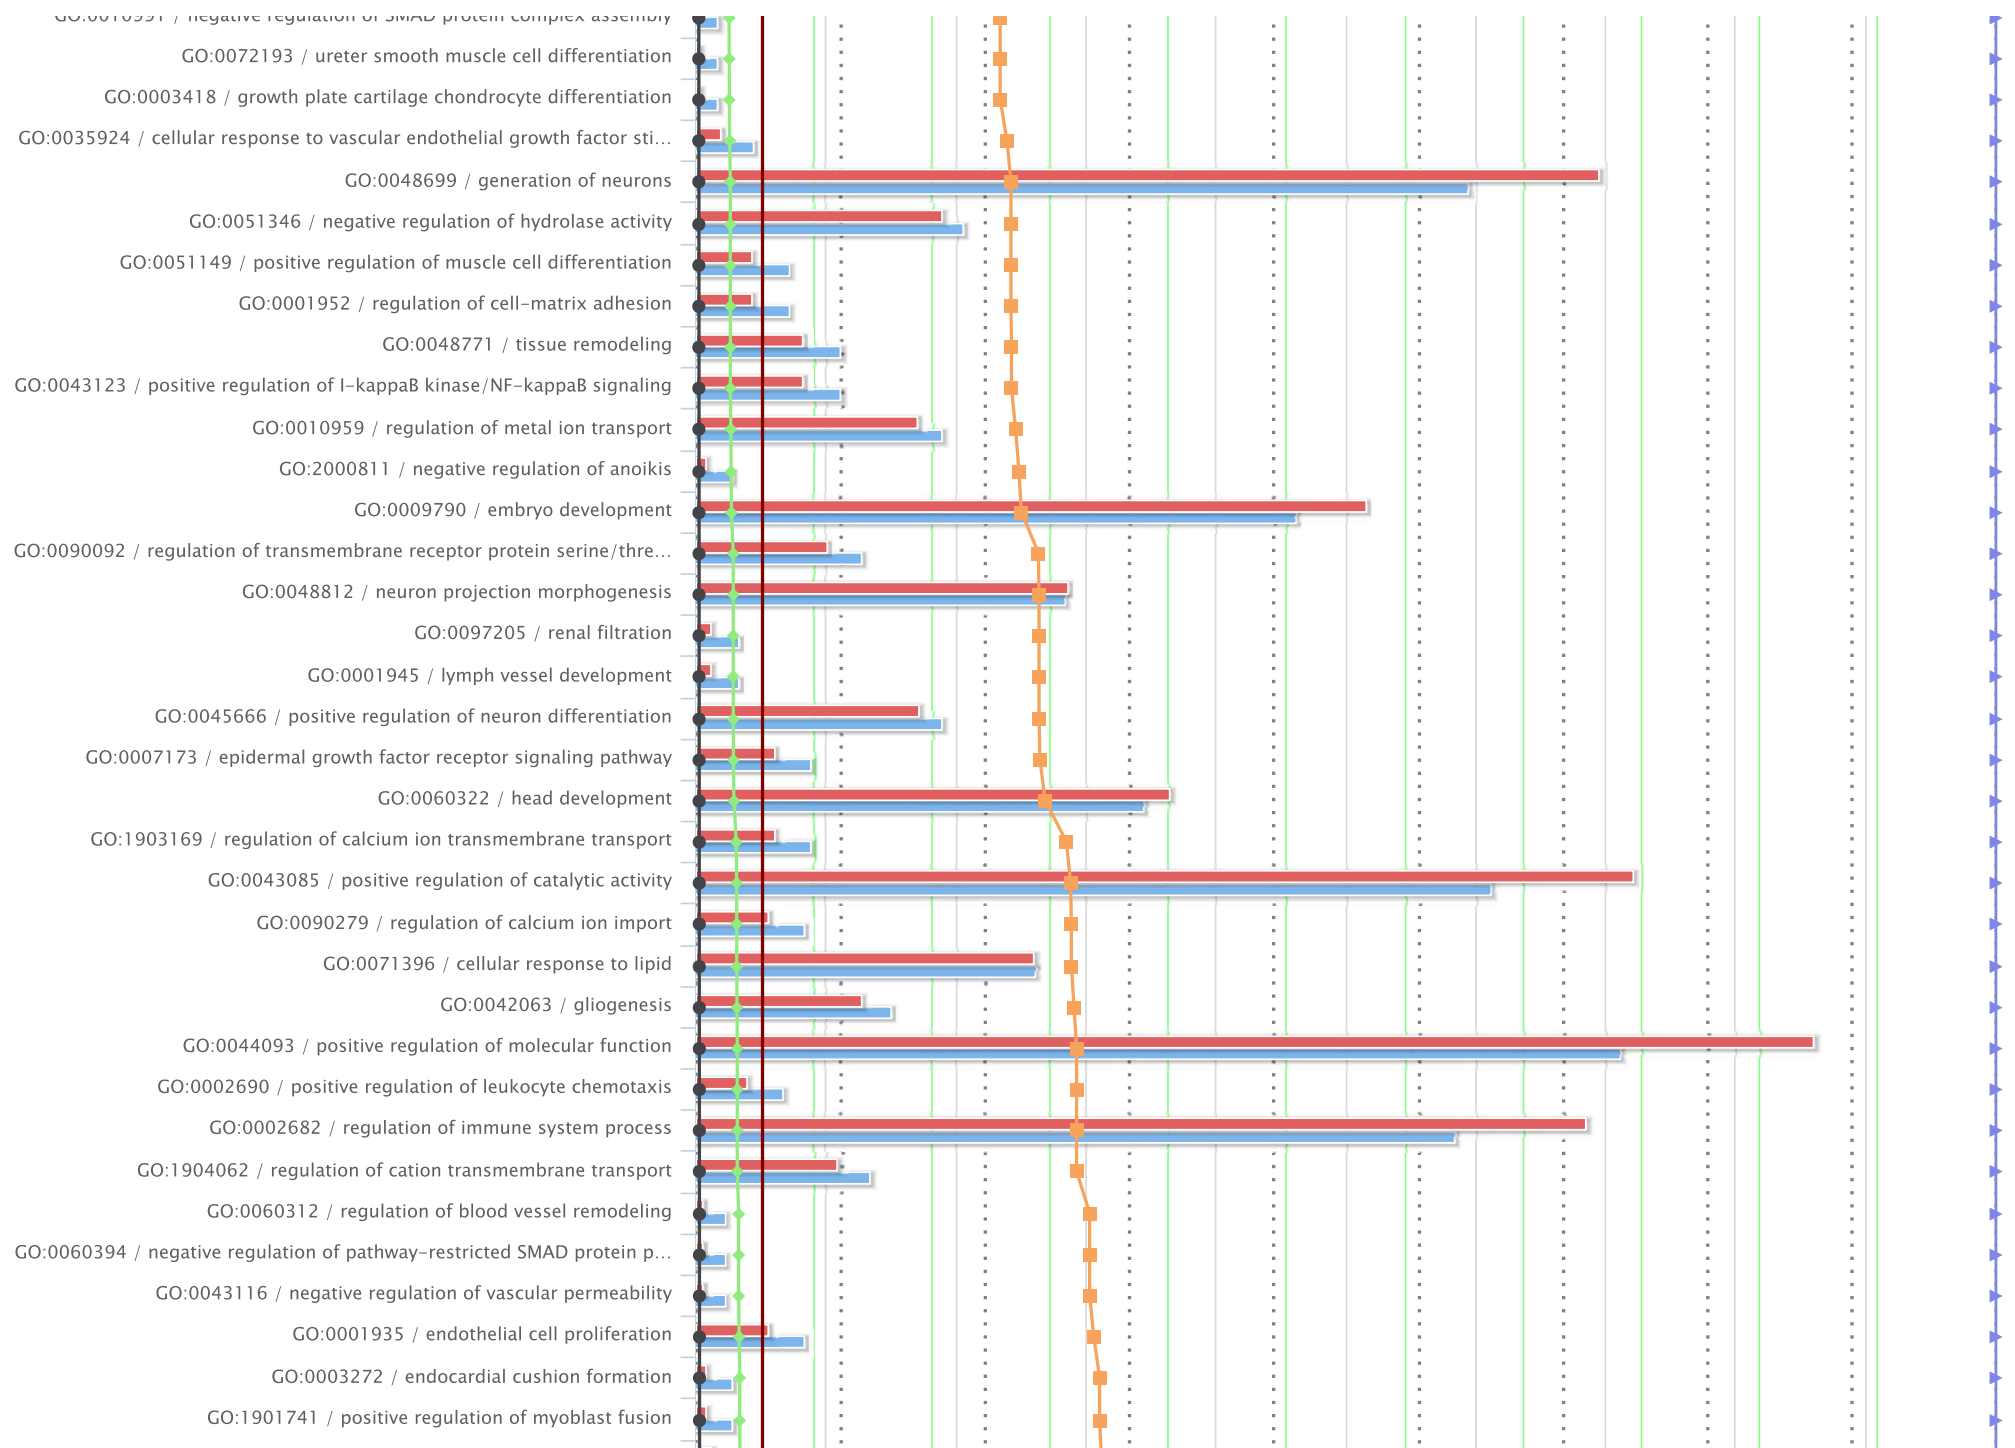

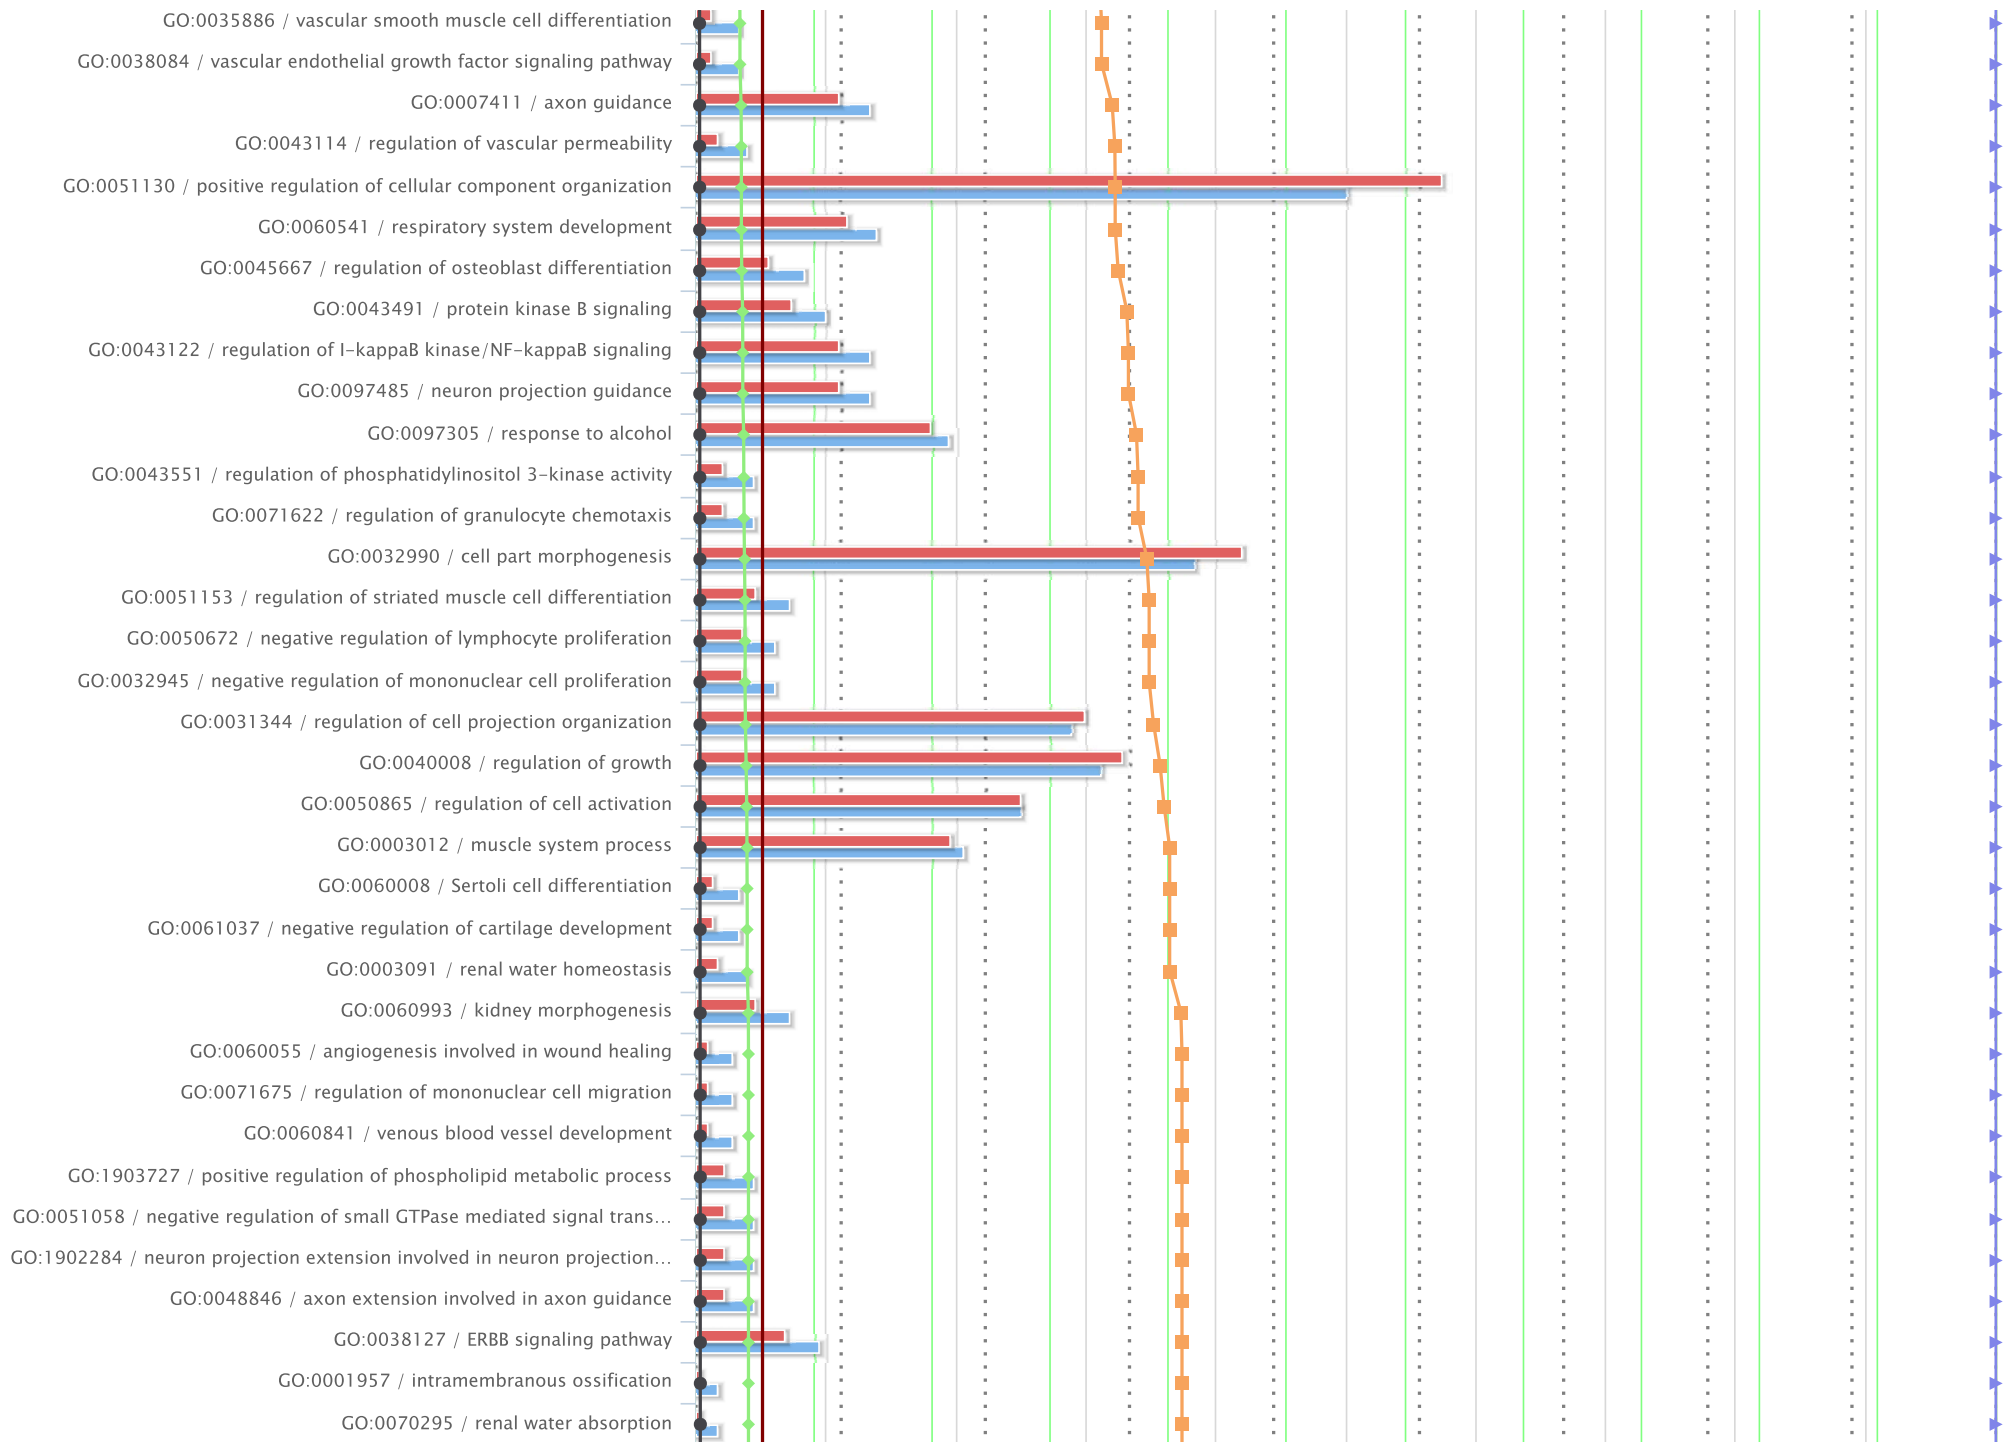

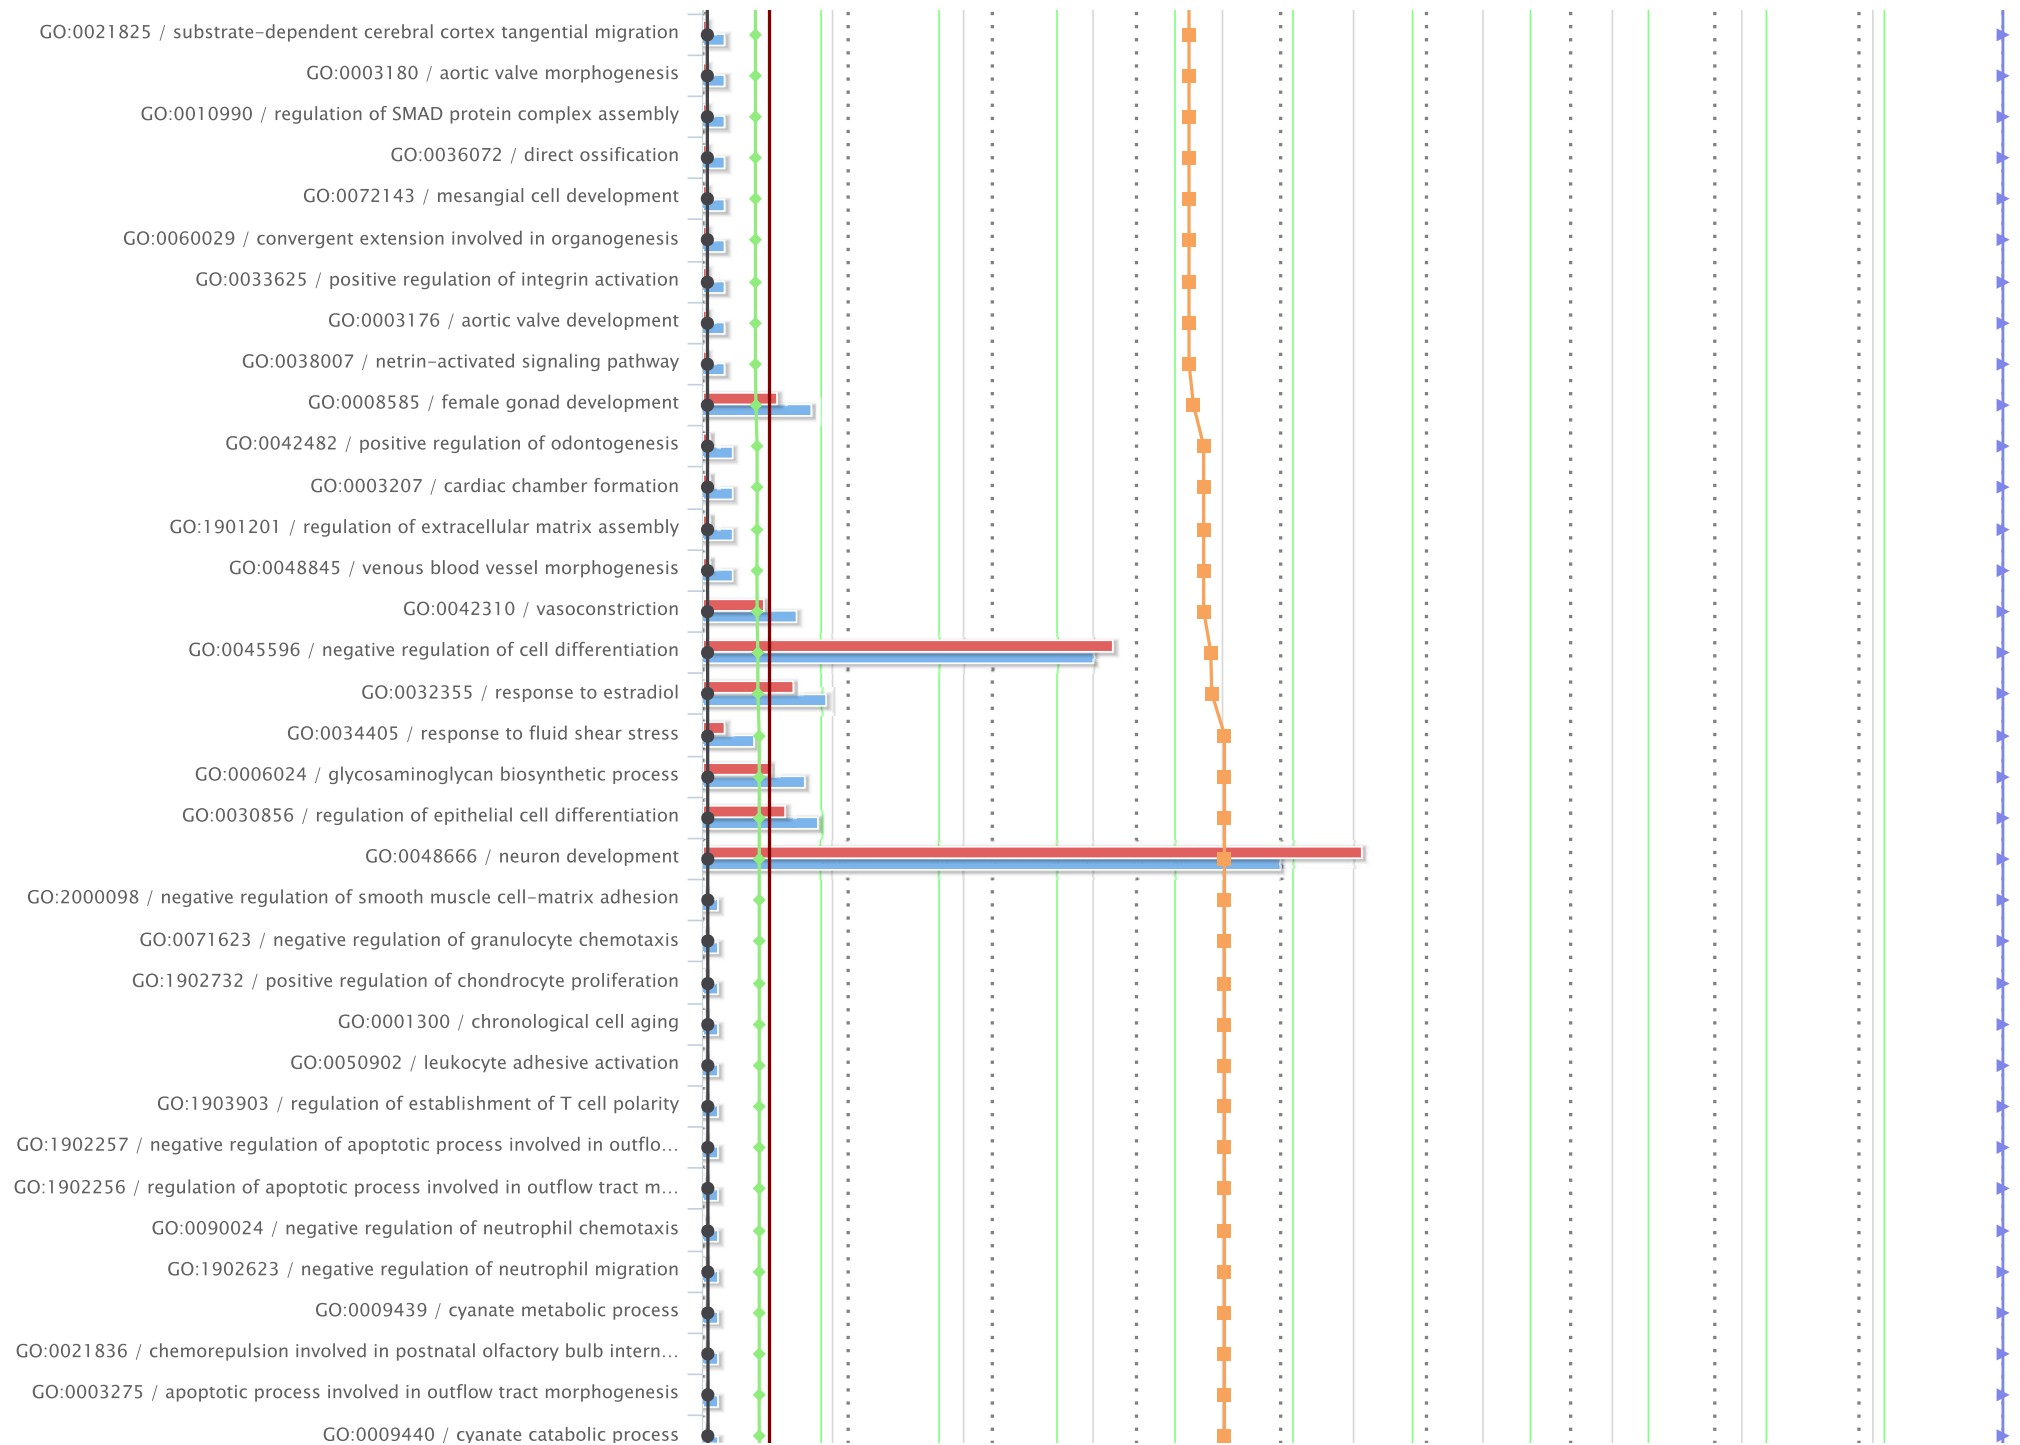

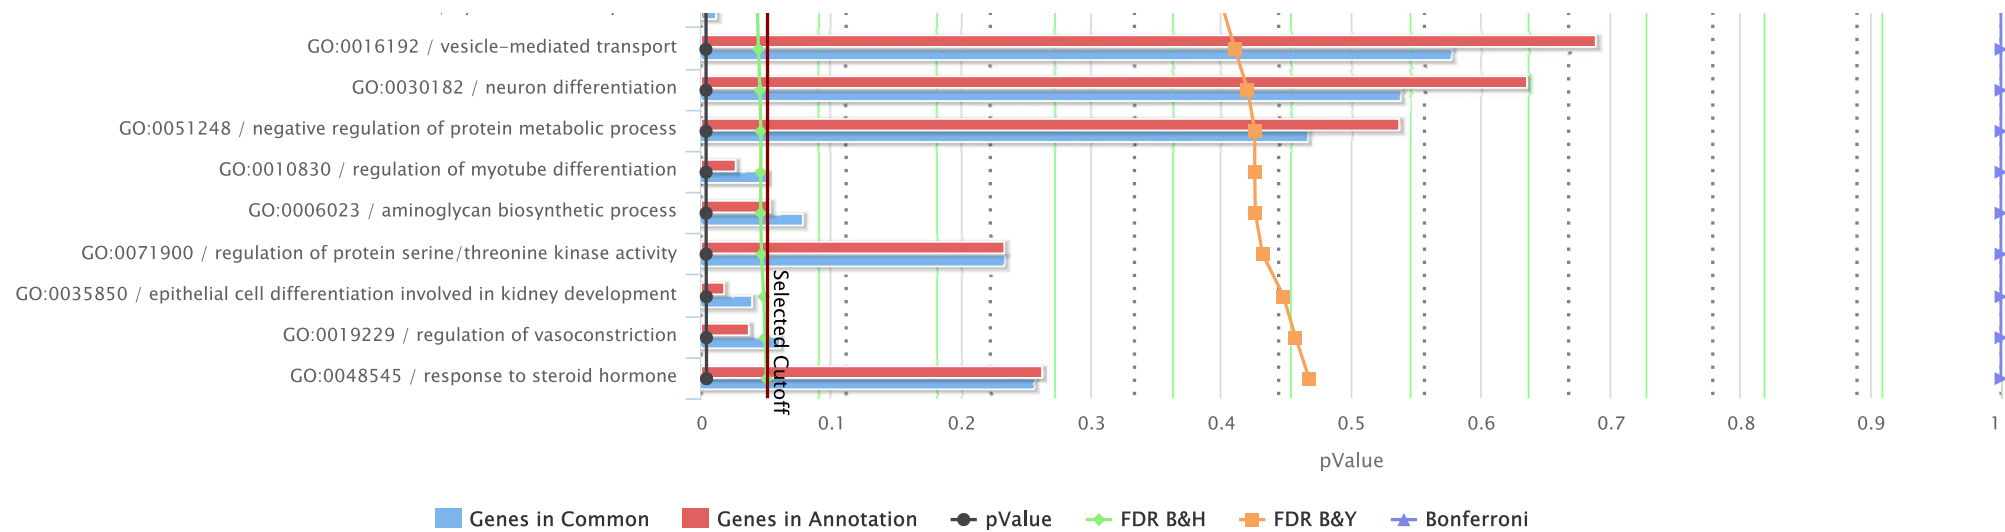

Supplementary Figure 5C  
Hyperacetylated genes

Significant Terms For: GO: Cellular Component

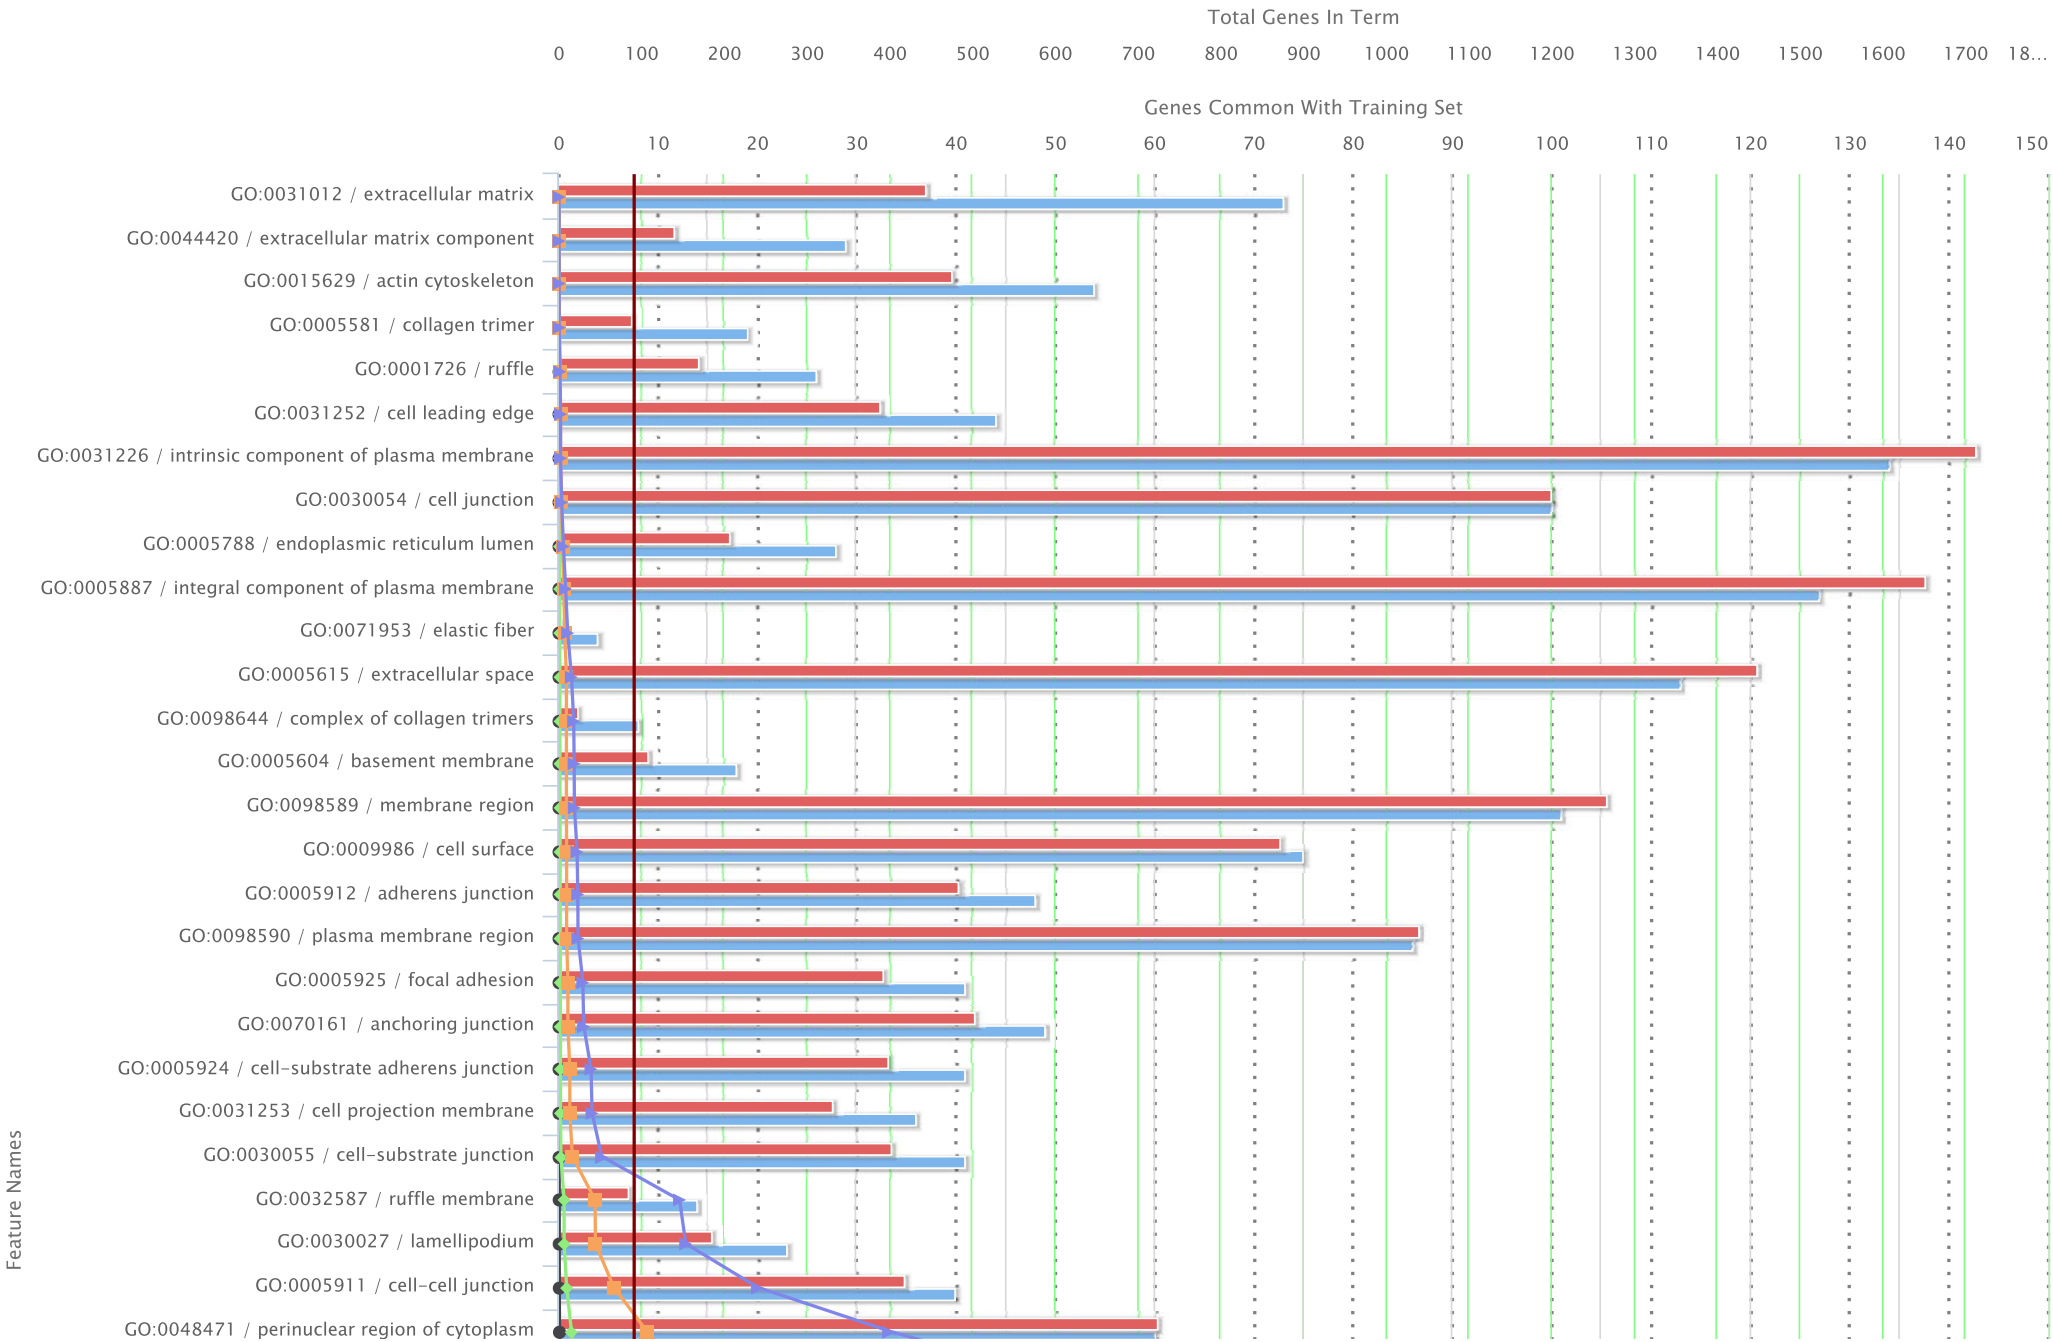

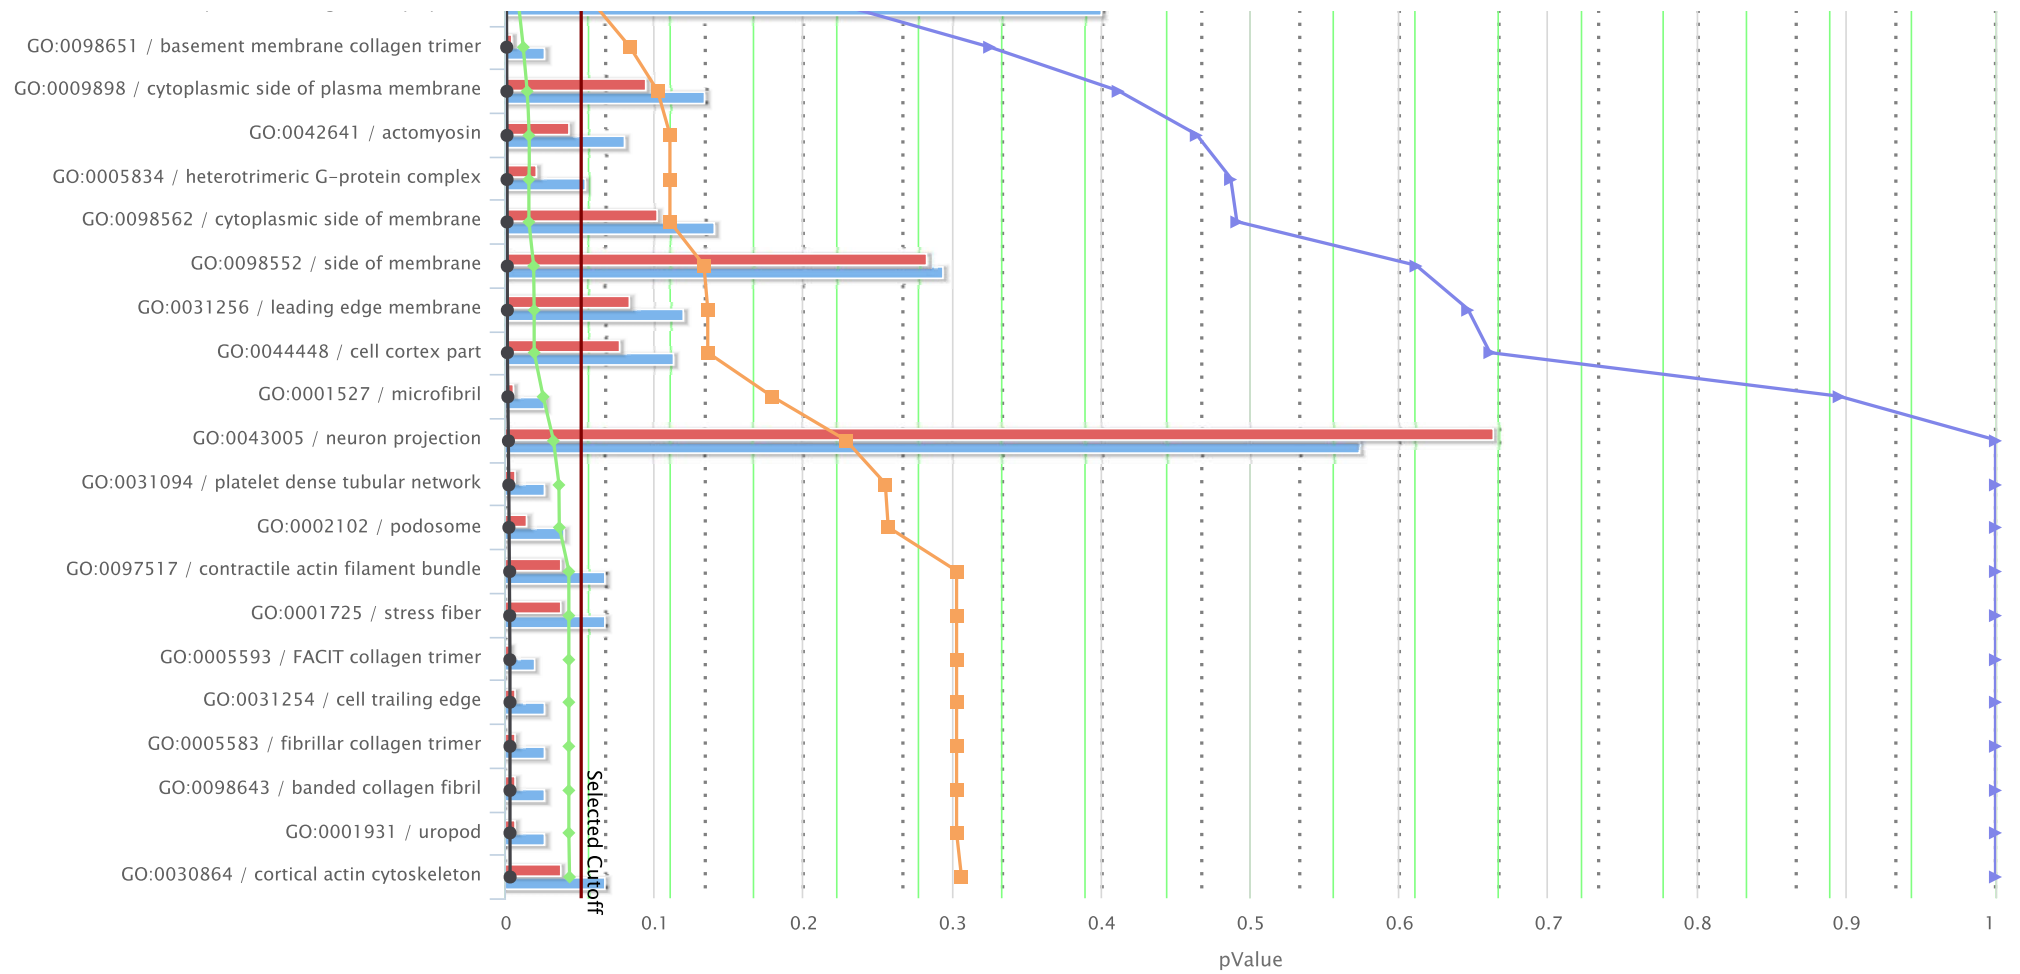

■ Genes in Common
 ■ Genes in Annotation
 ● pValue
 ◆ FDR B&H
 ■ FDR B&Y
 ▲ Bonferroni

Supplementary Figure 5D  
Hypoacetylated genes

Significant Terms For: GO: Molecular Function

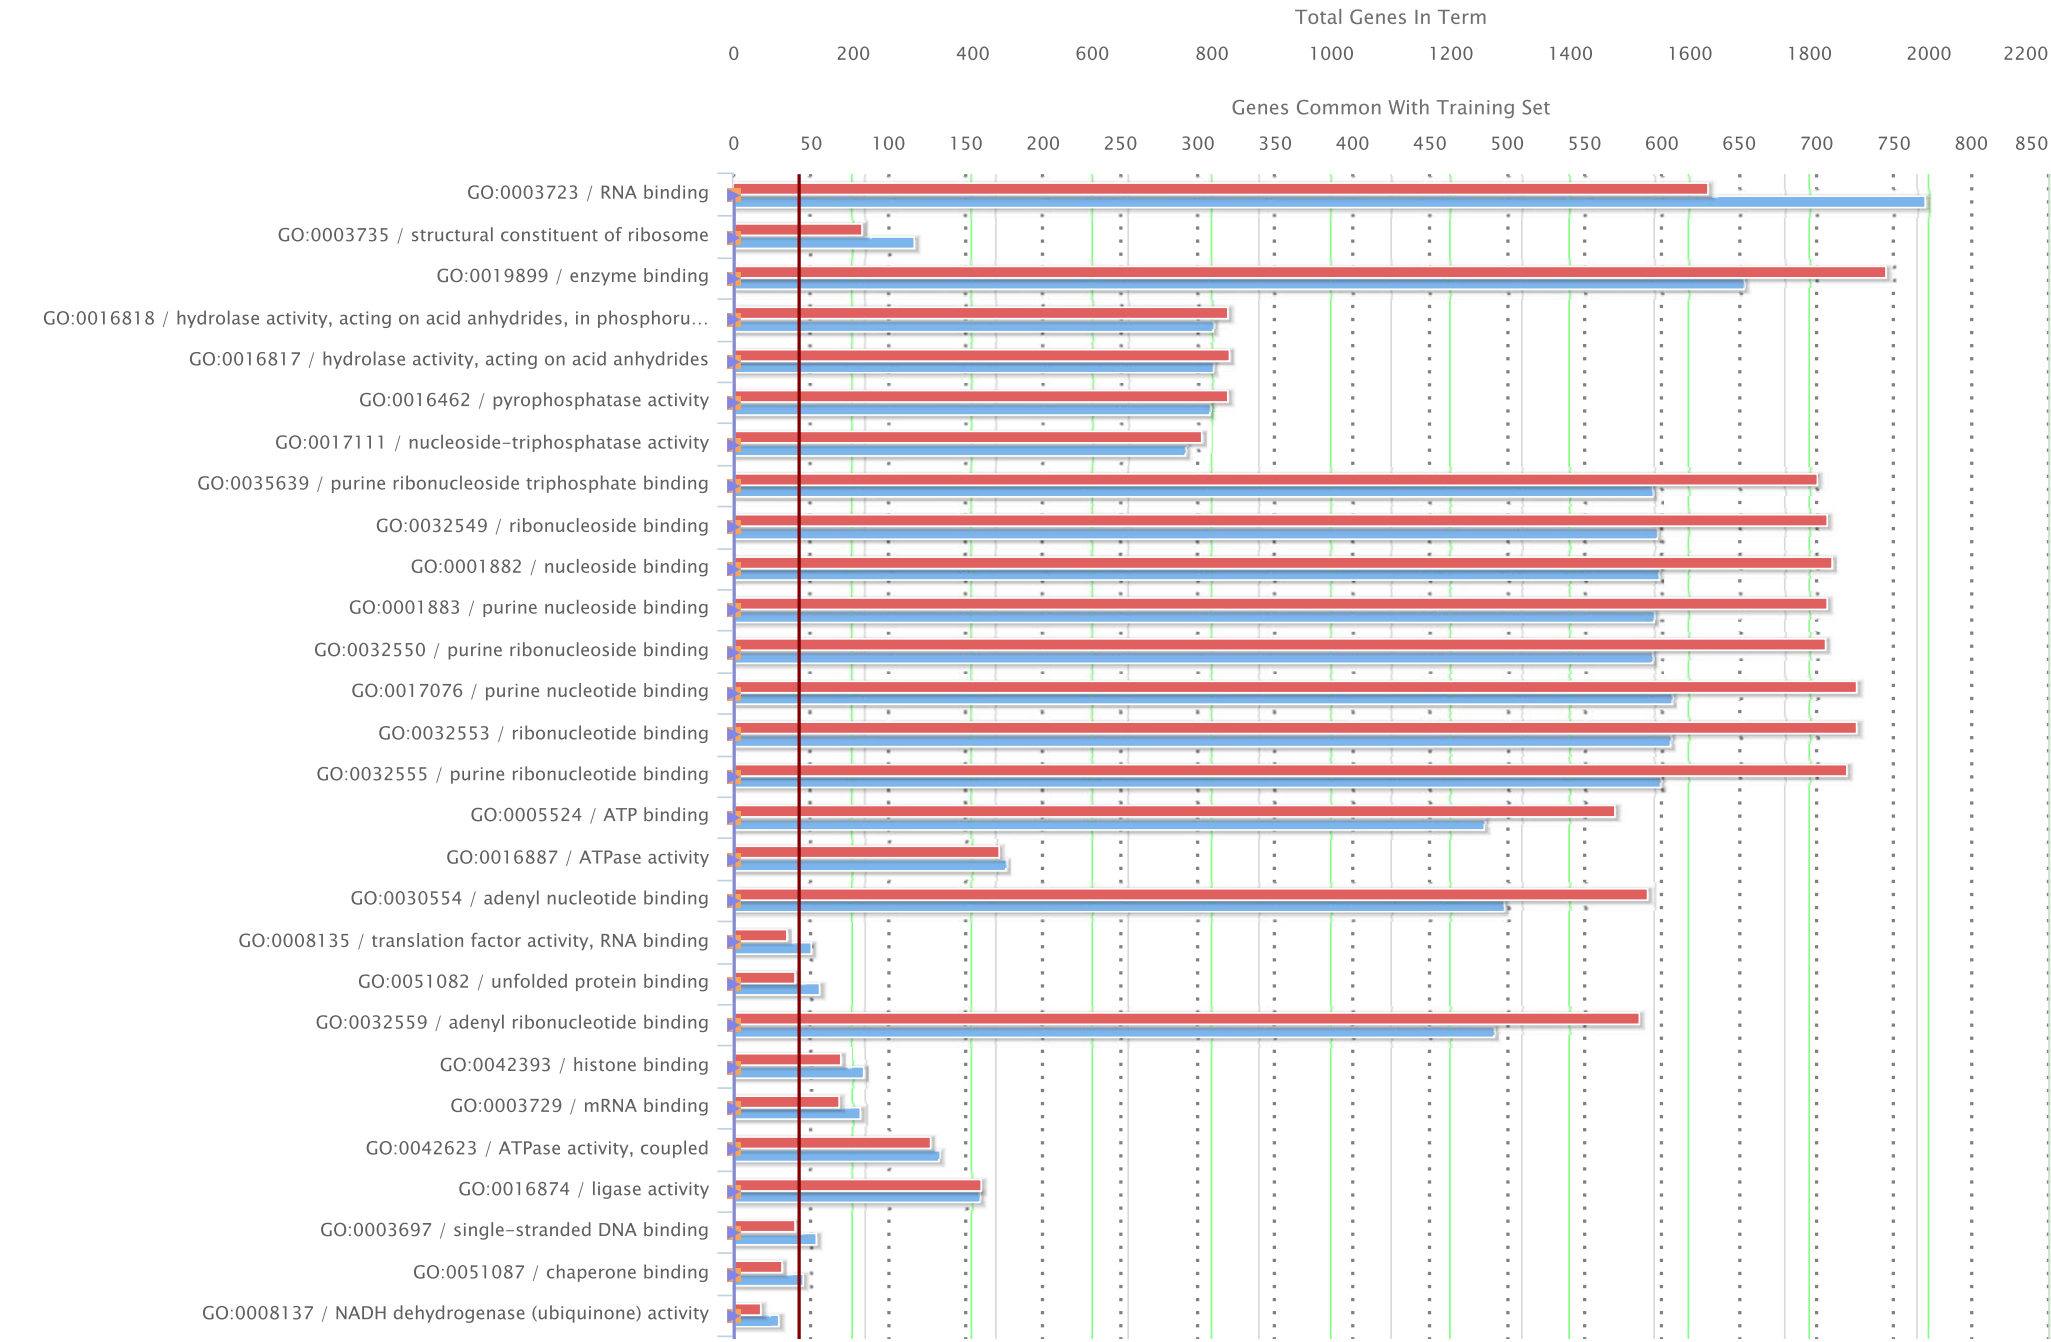

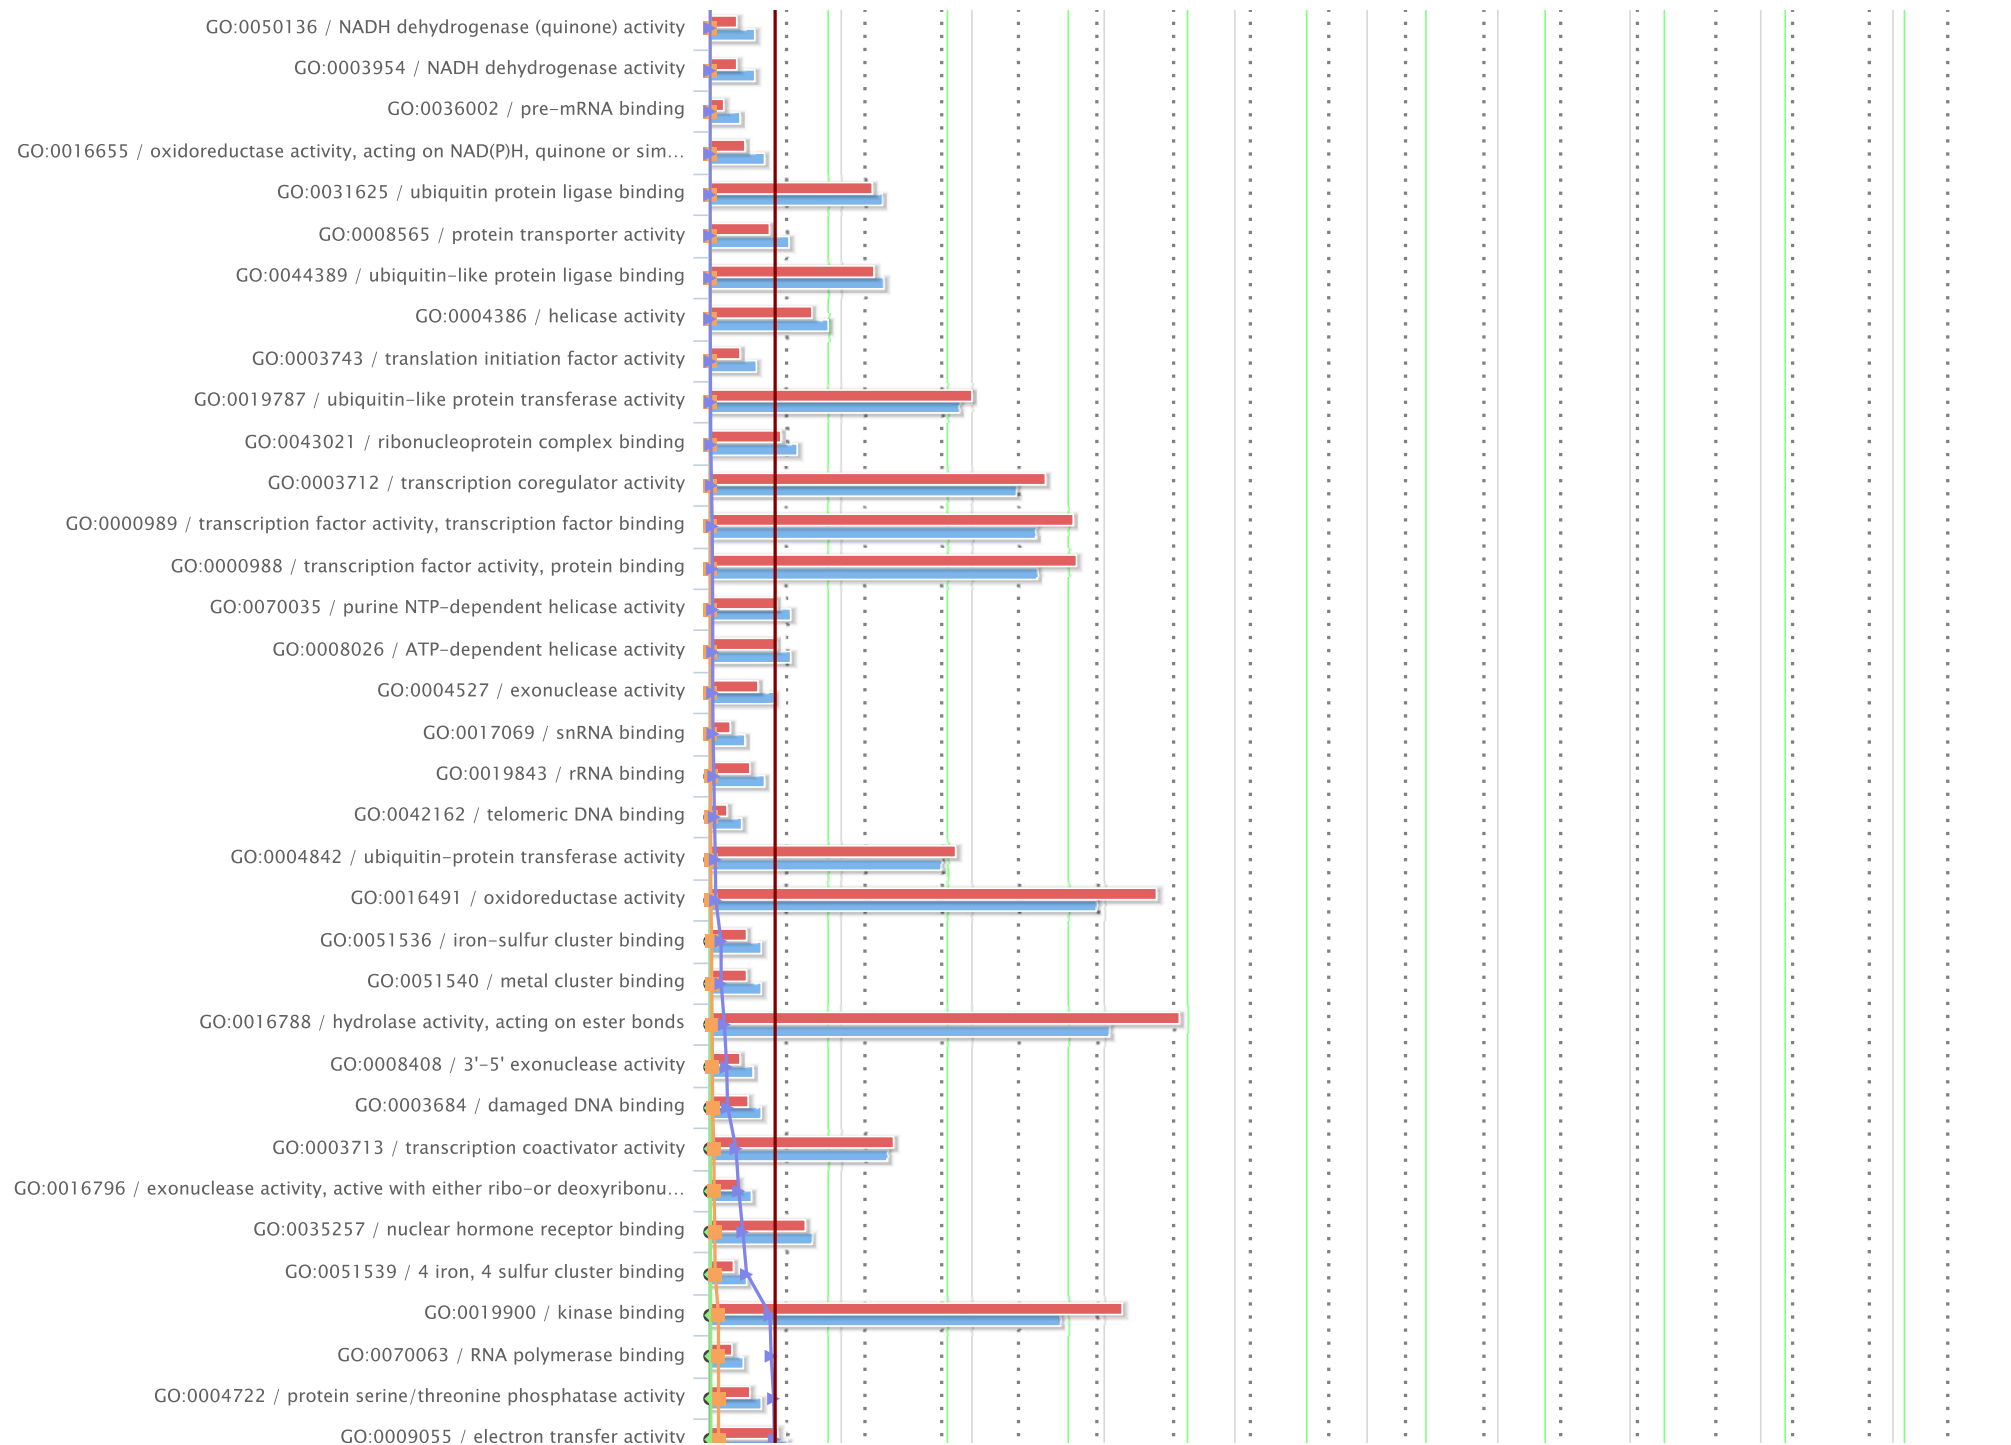

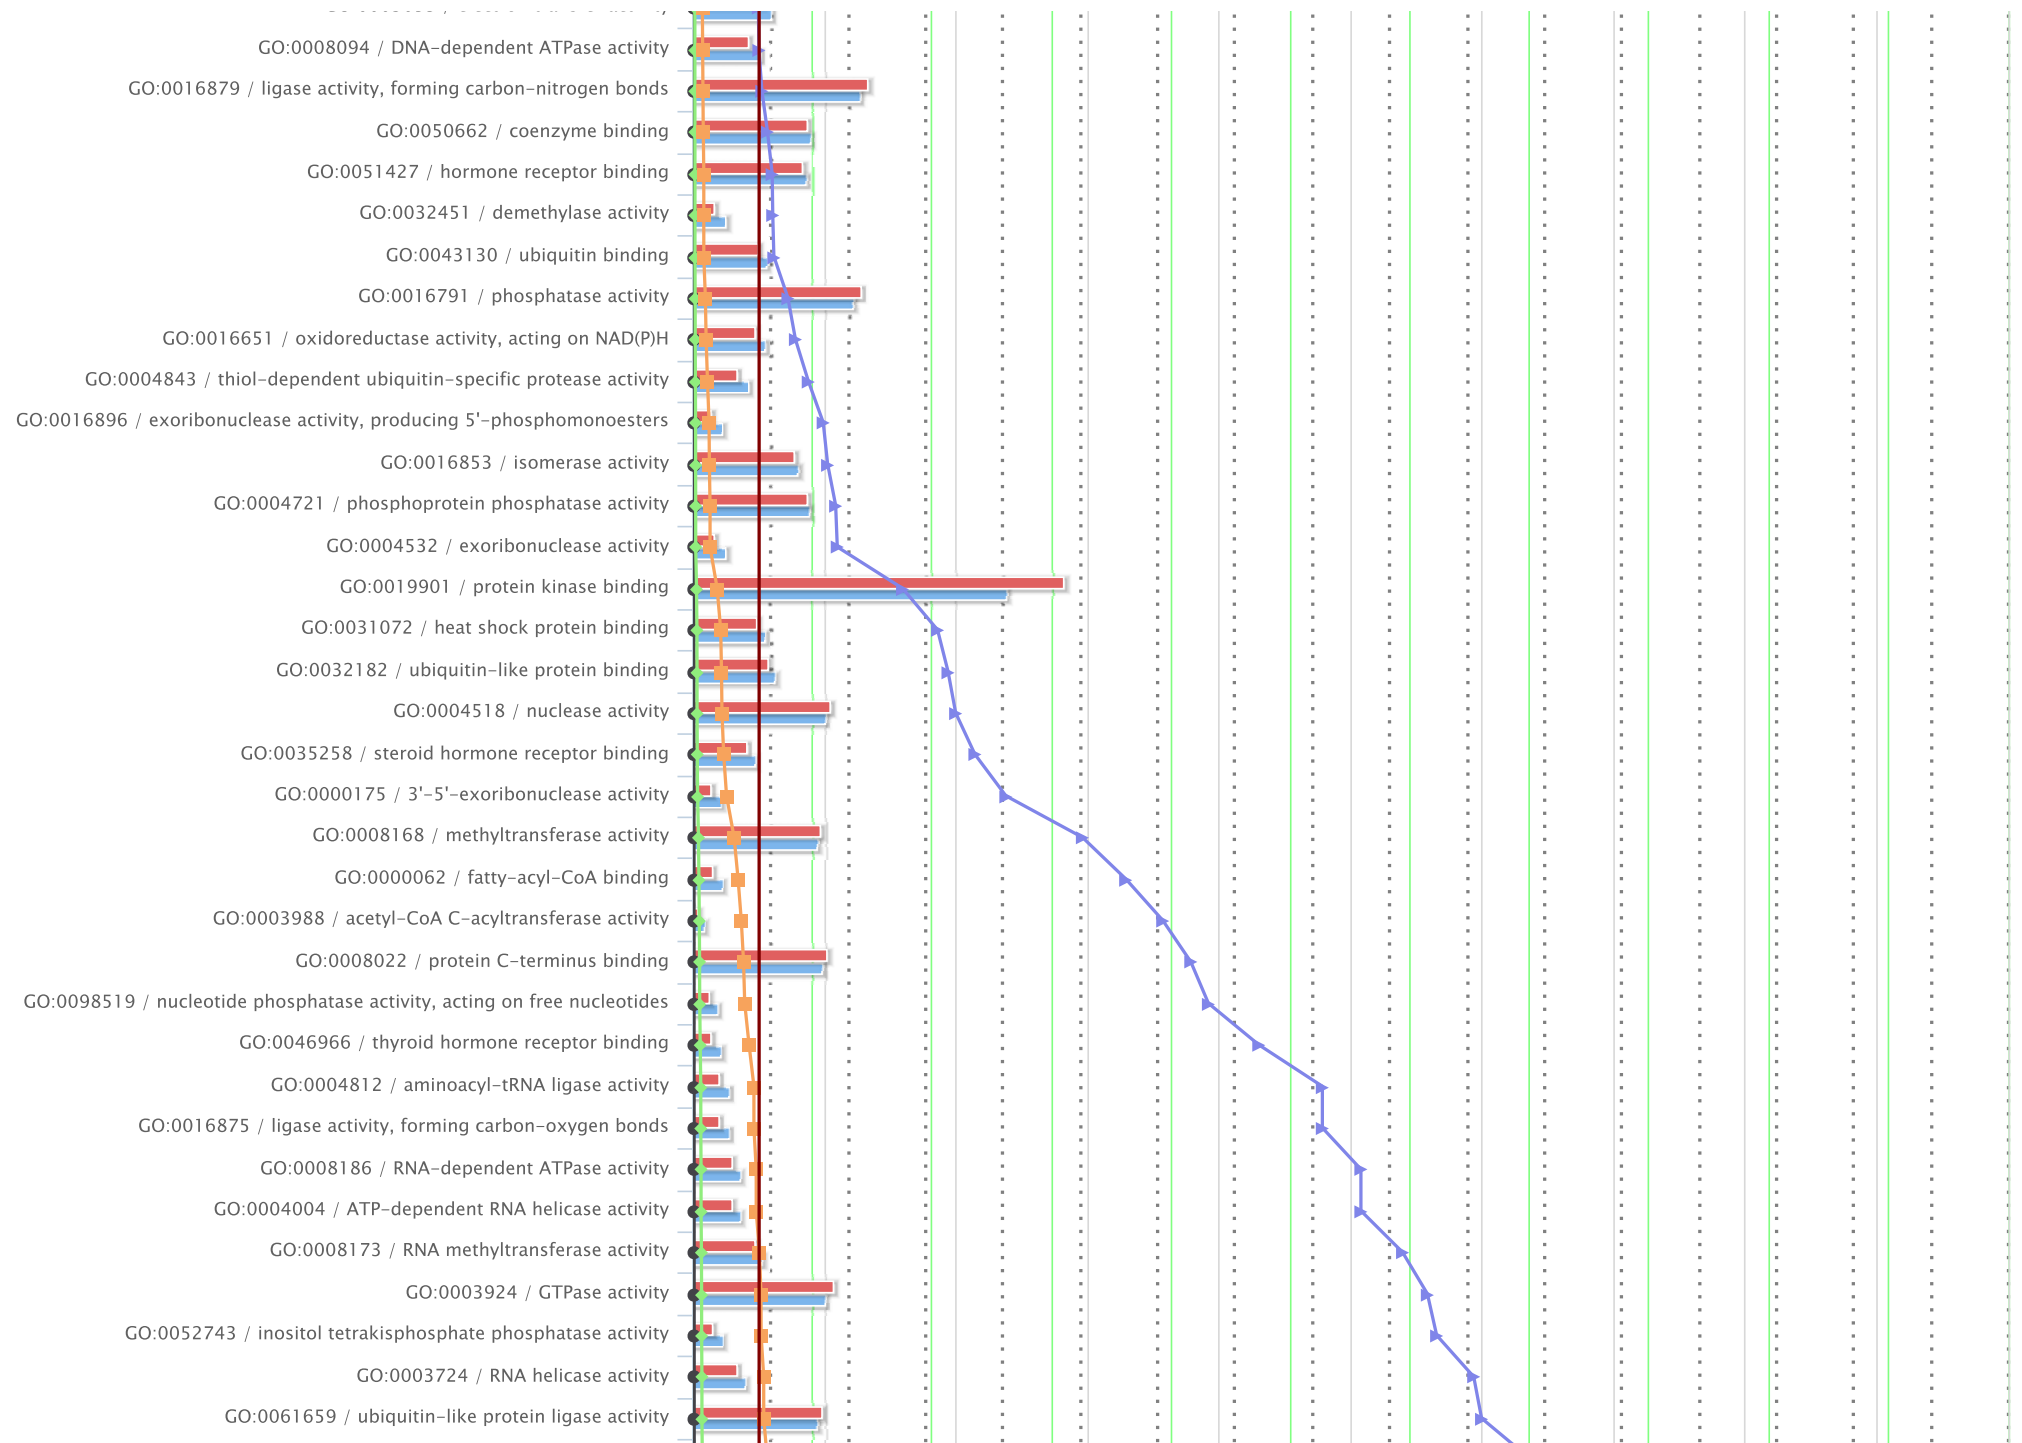

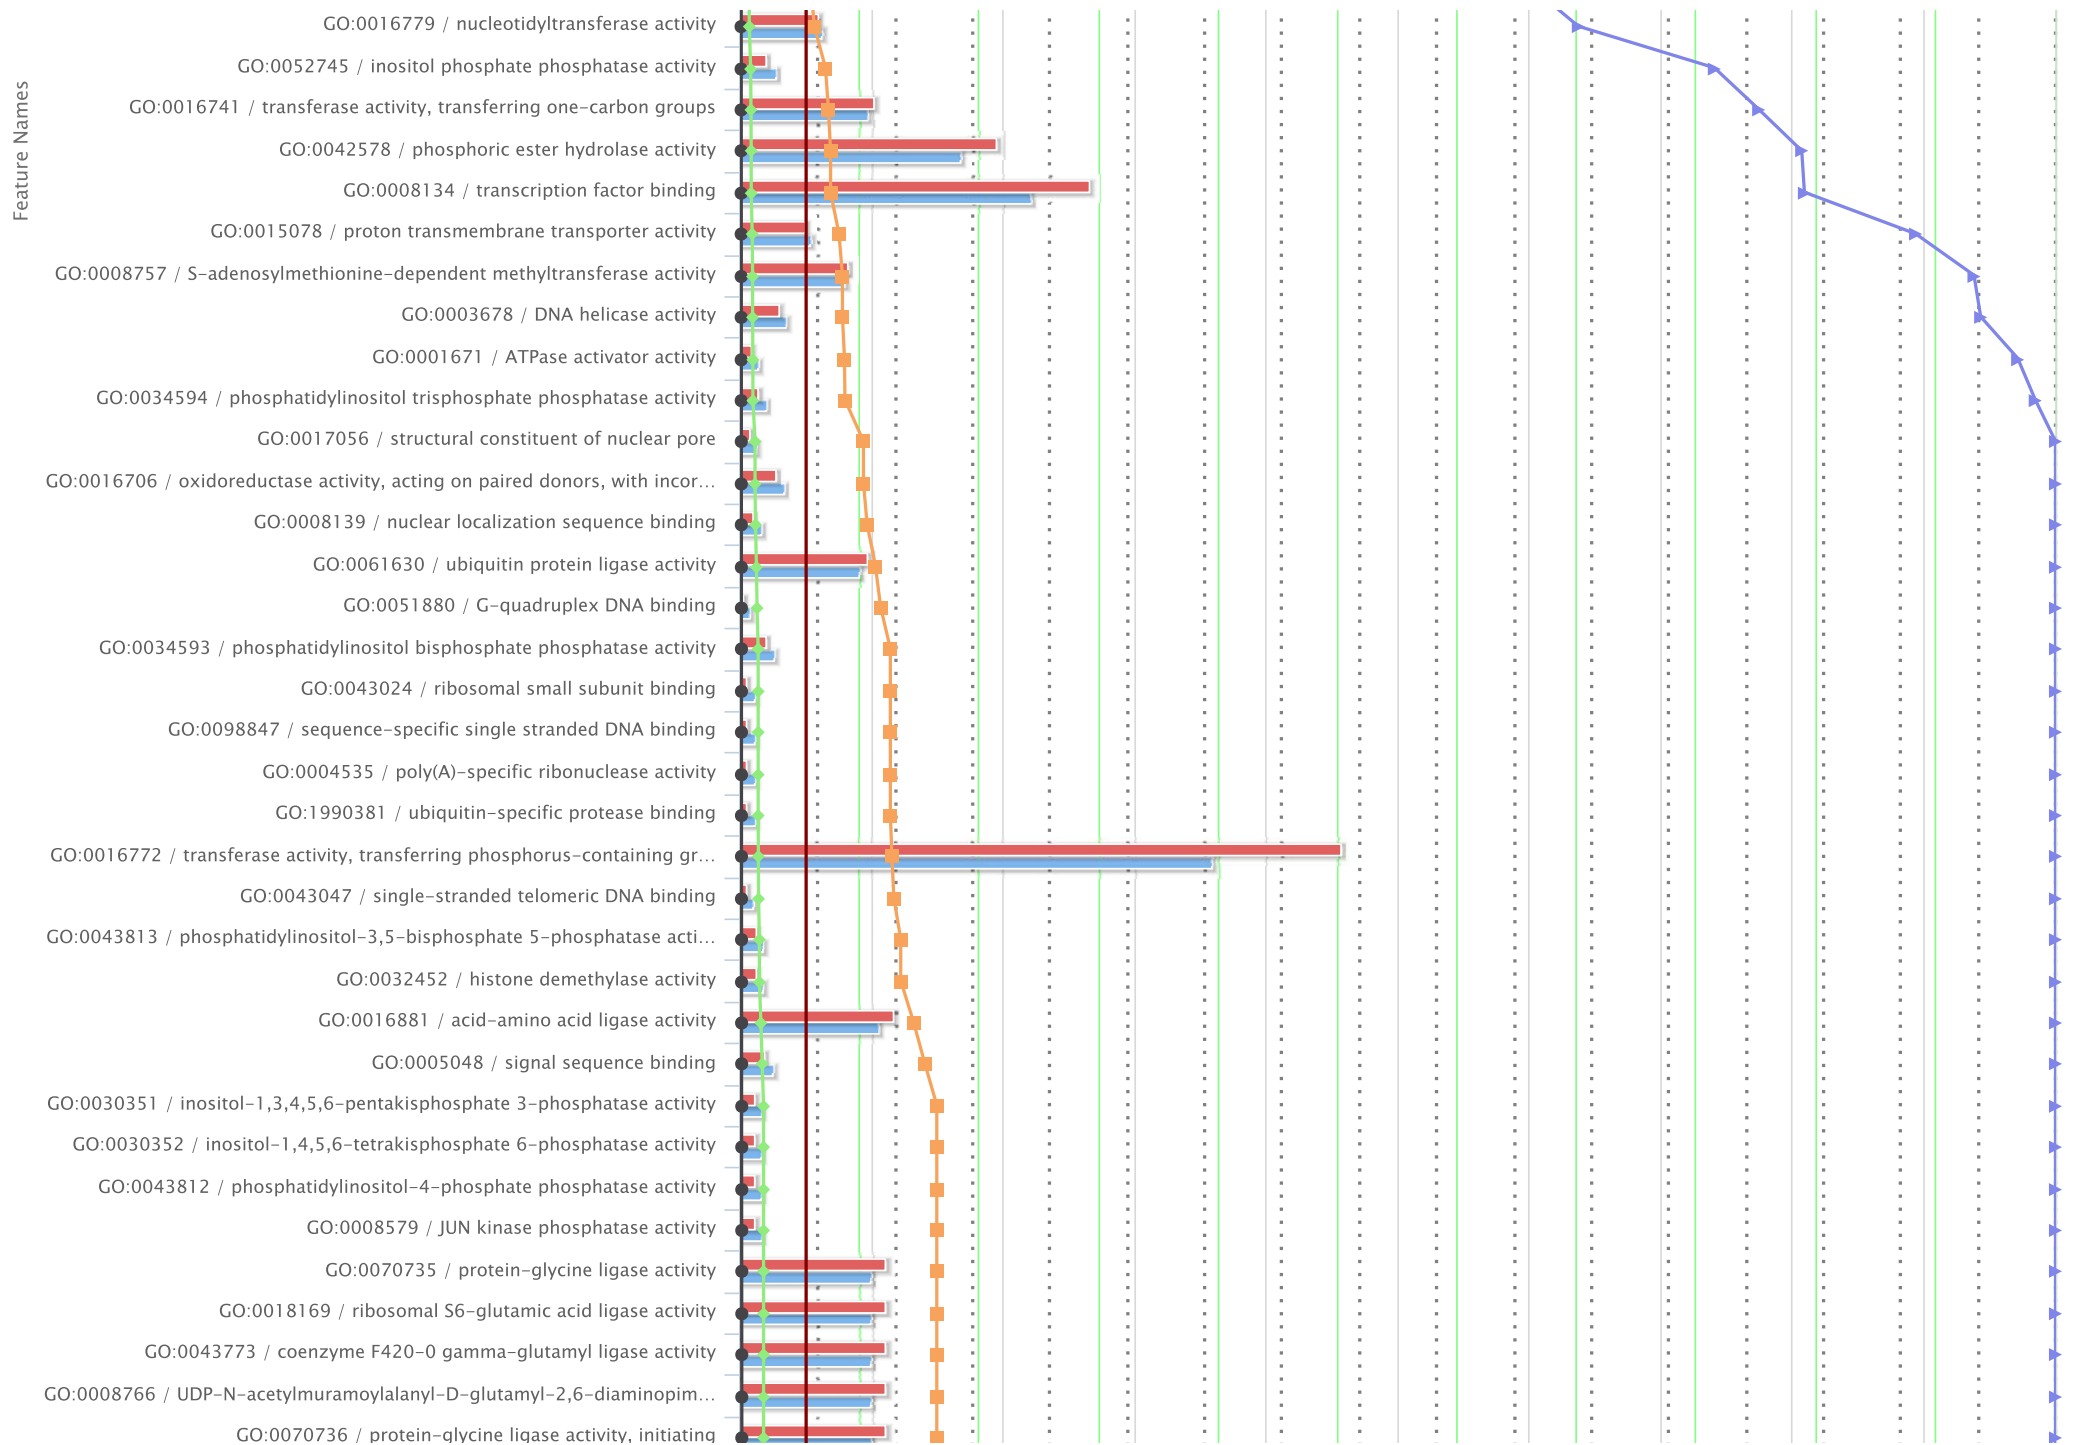

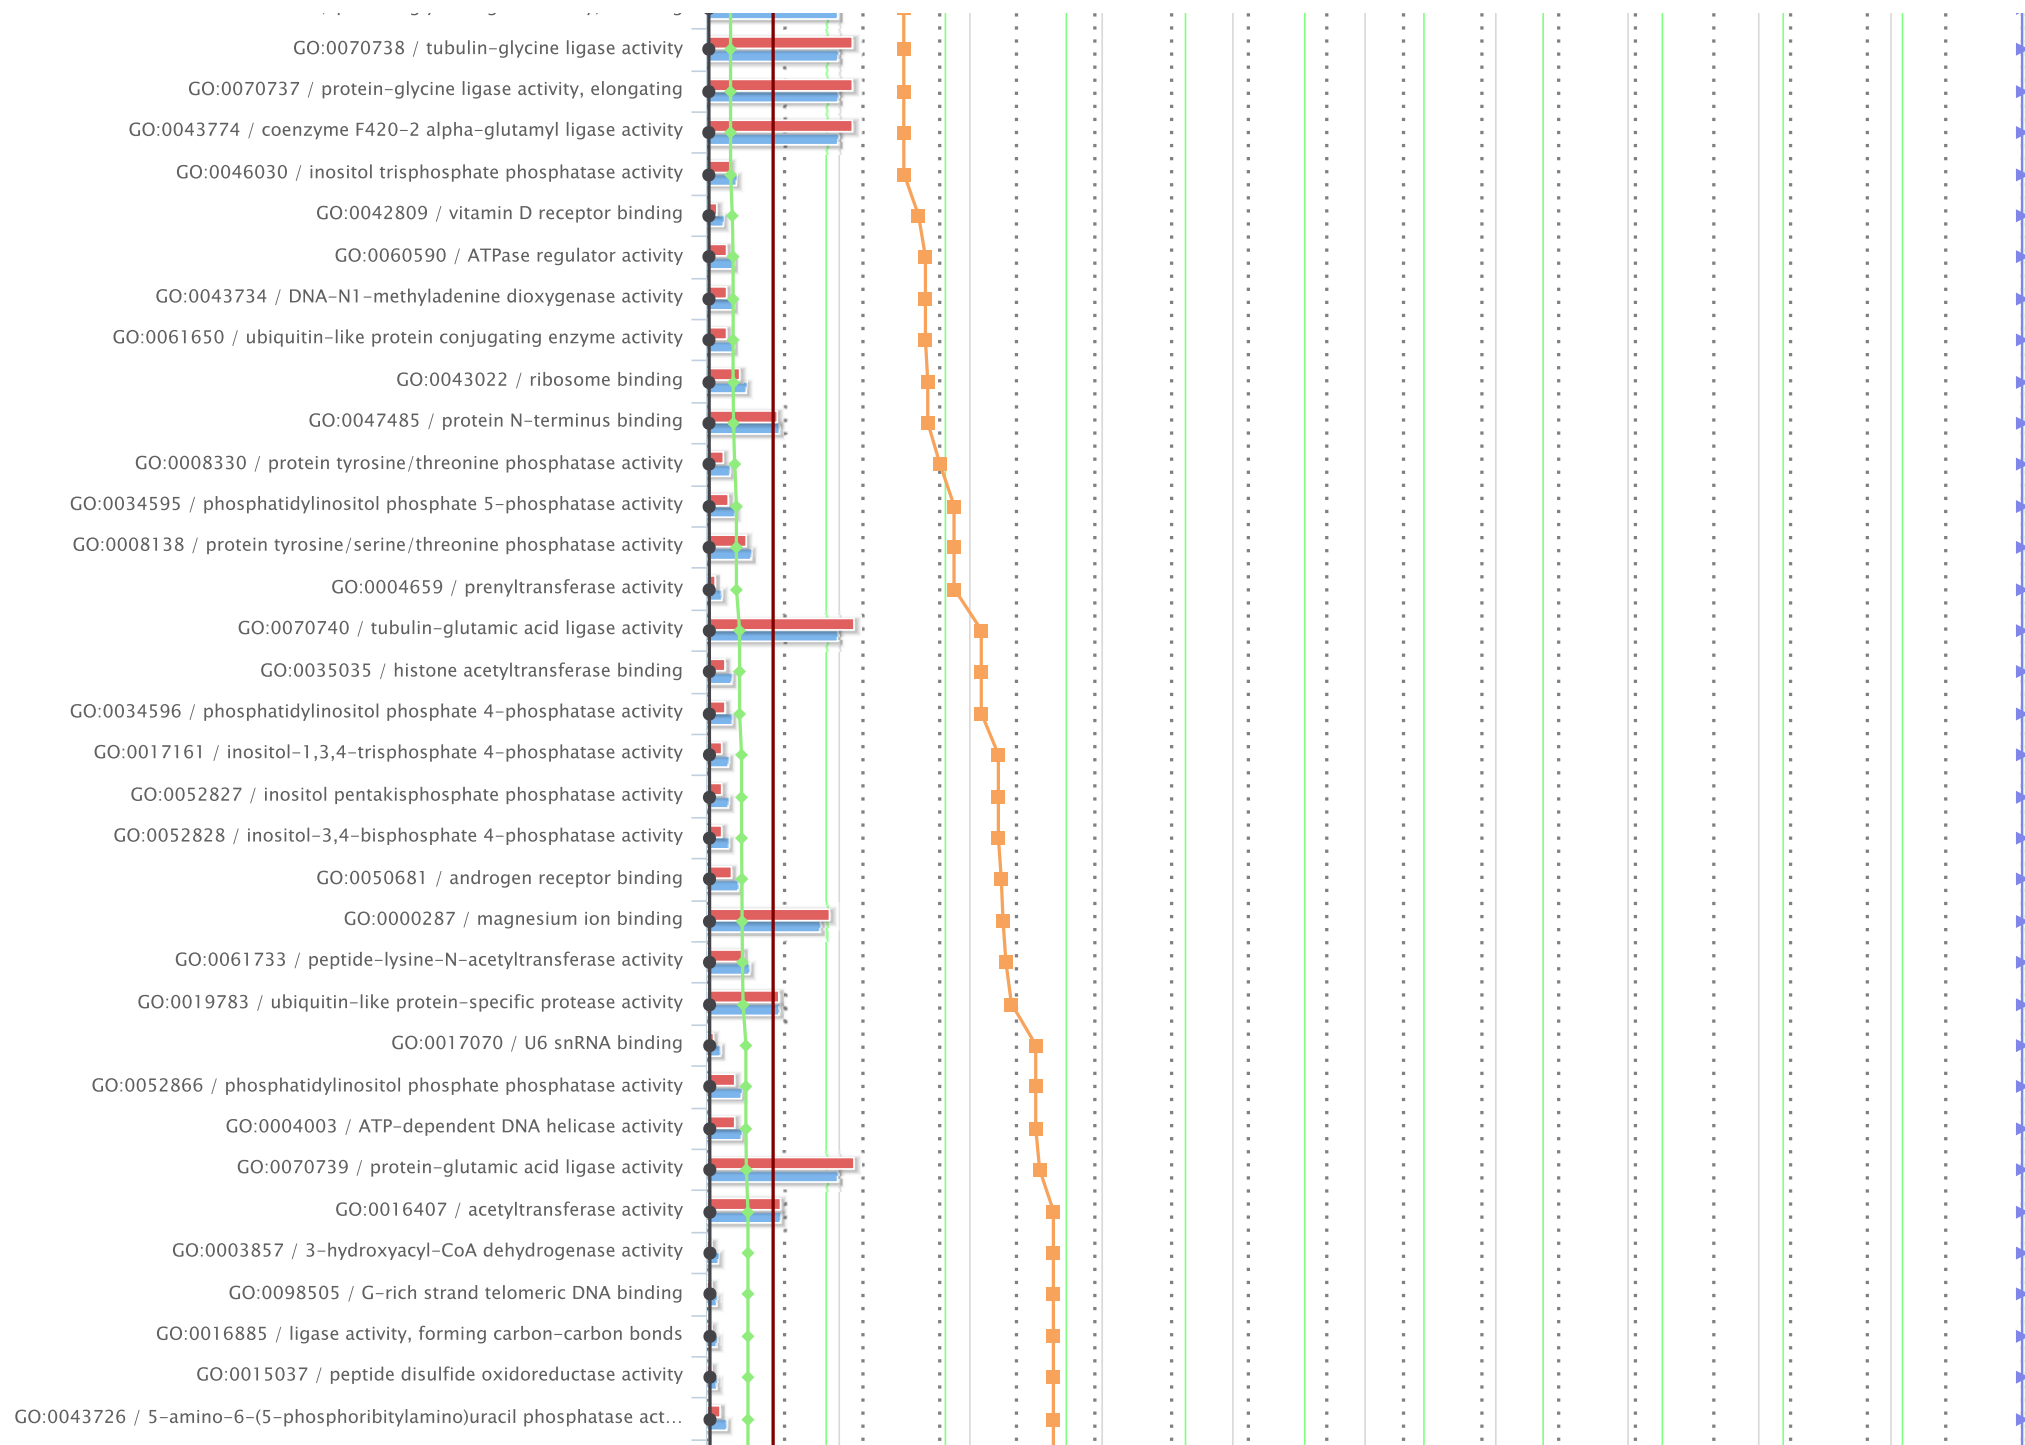

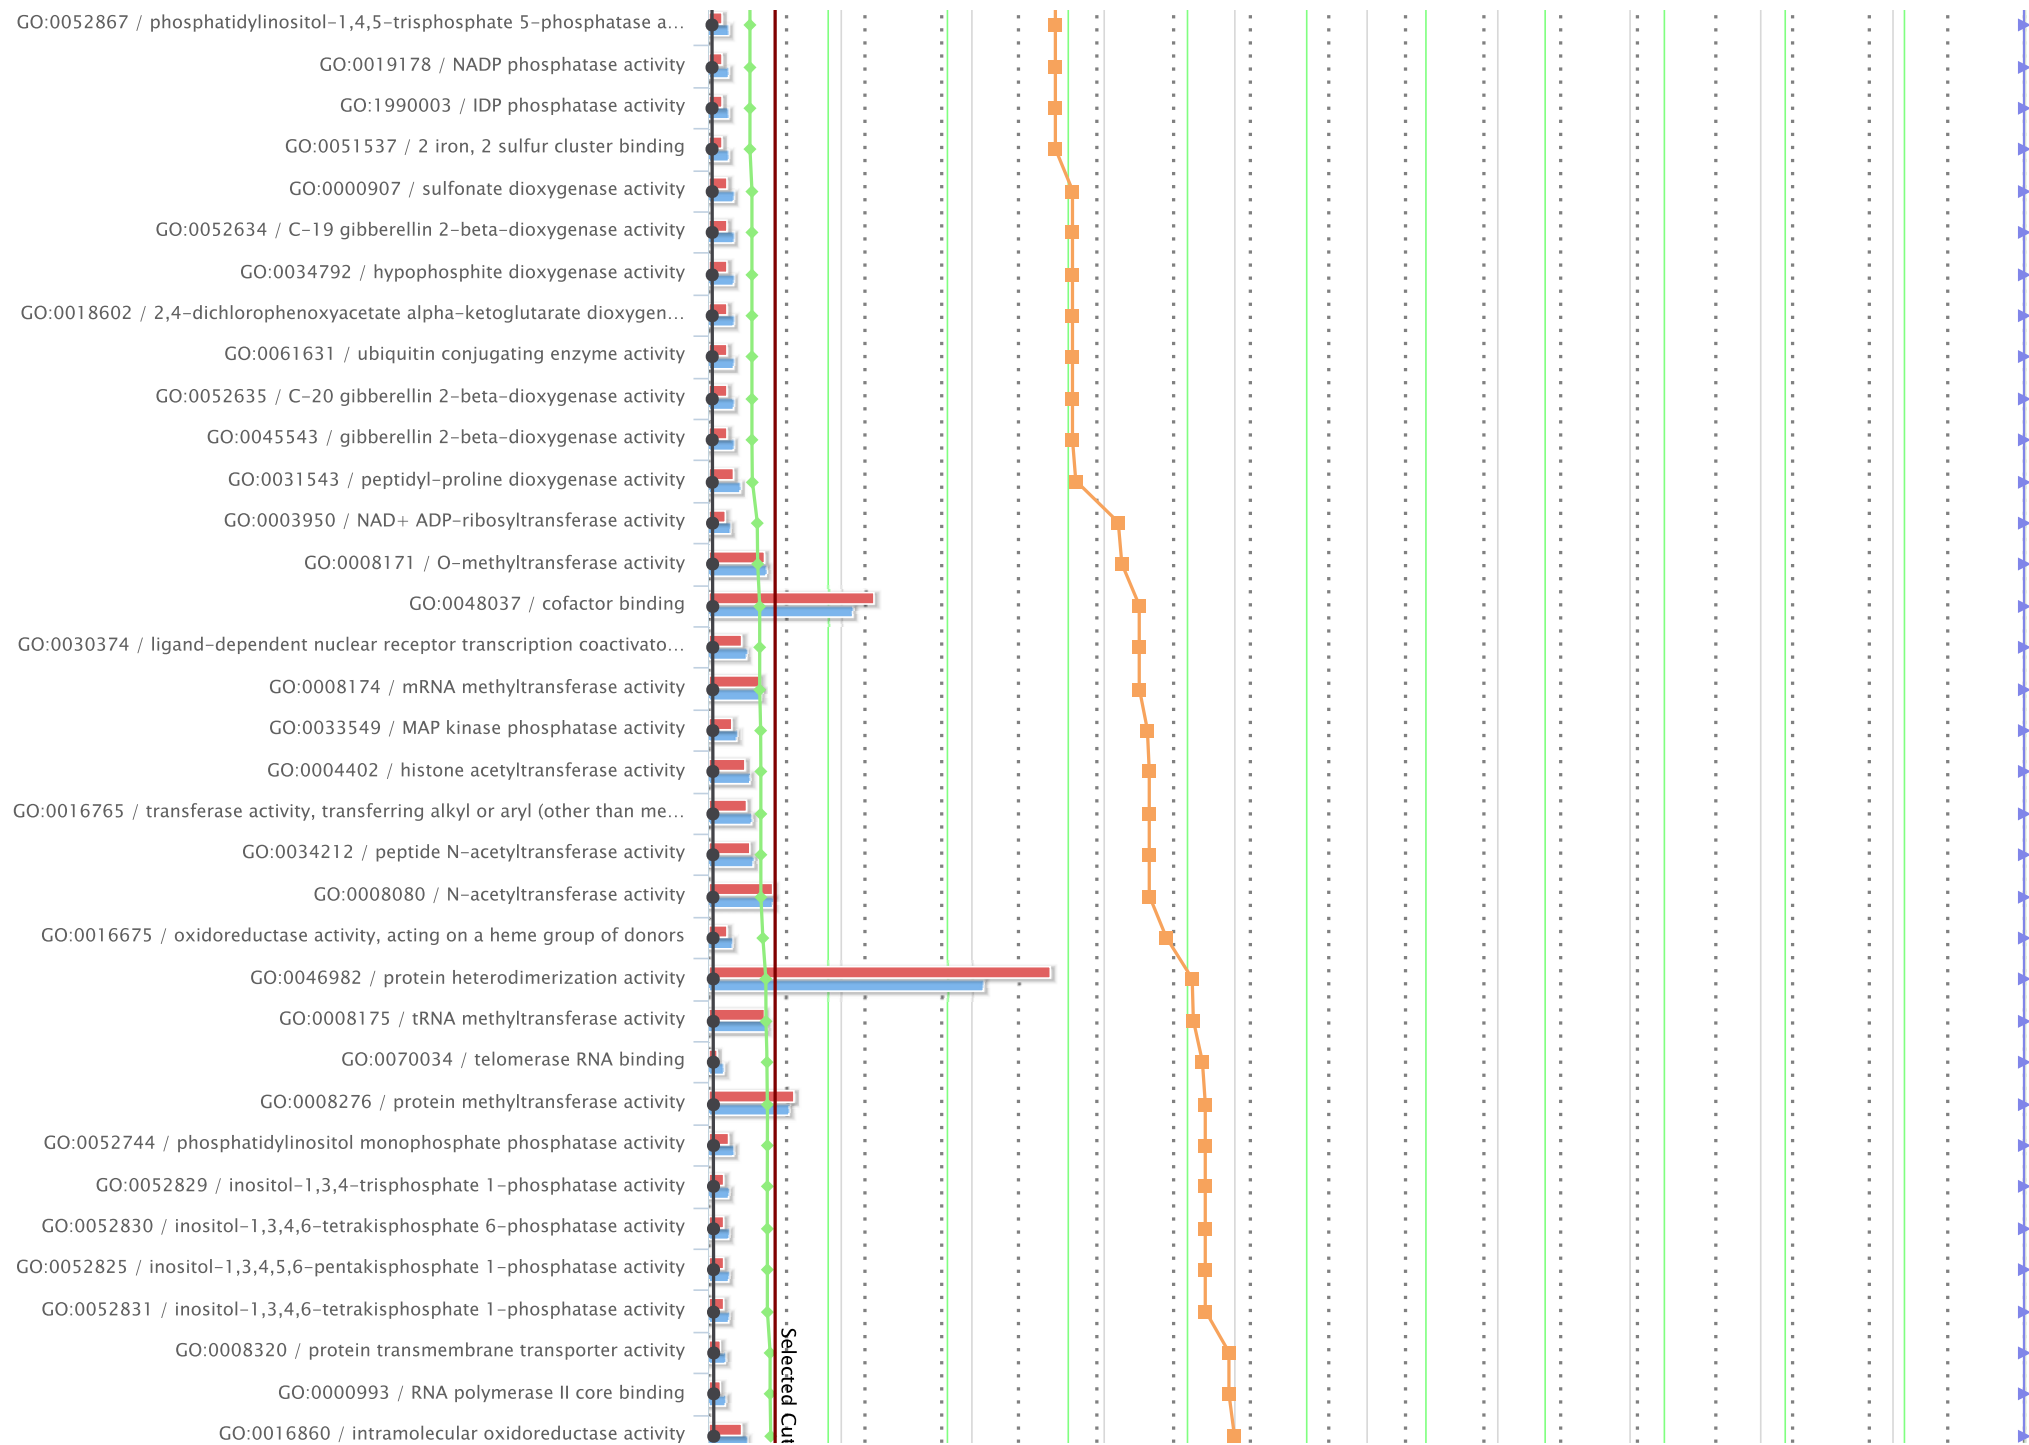

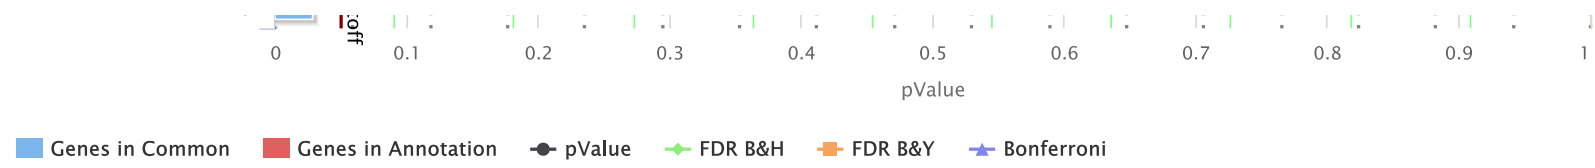

Supplementary Figure 5E  
Hypoacetylated genes

Significant Terms For: GO: Biological Process

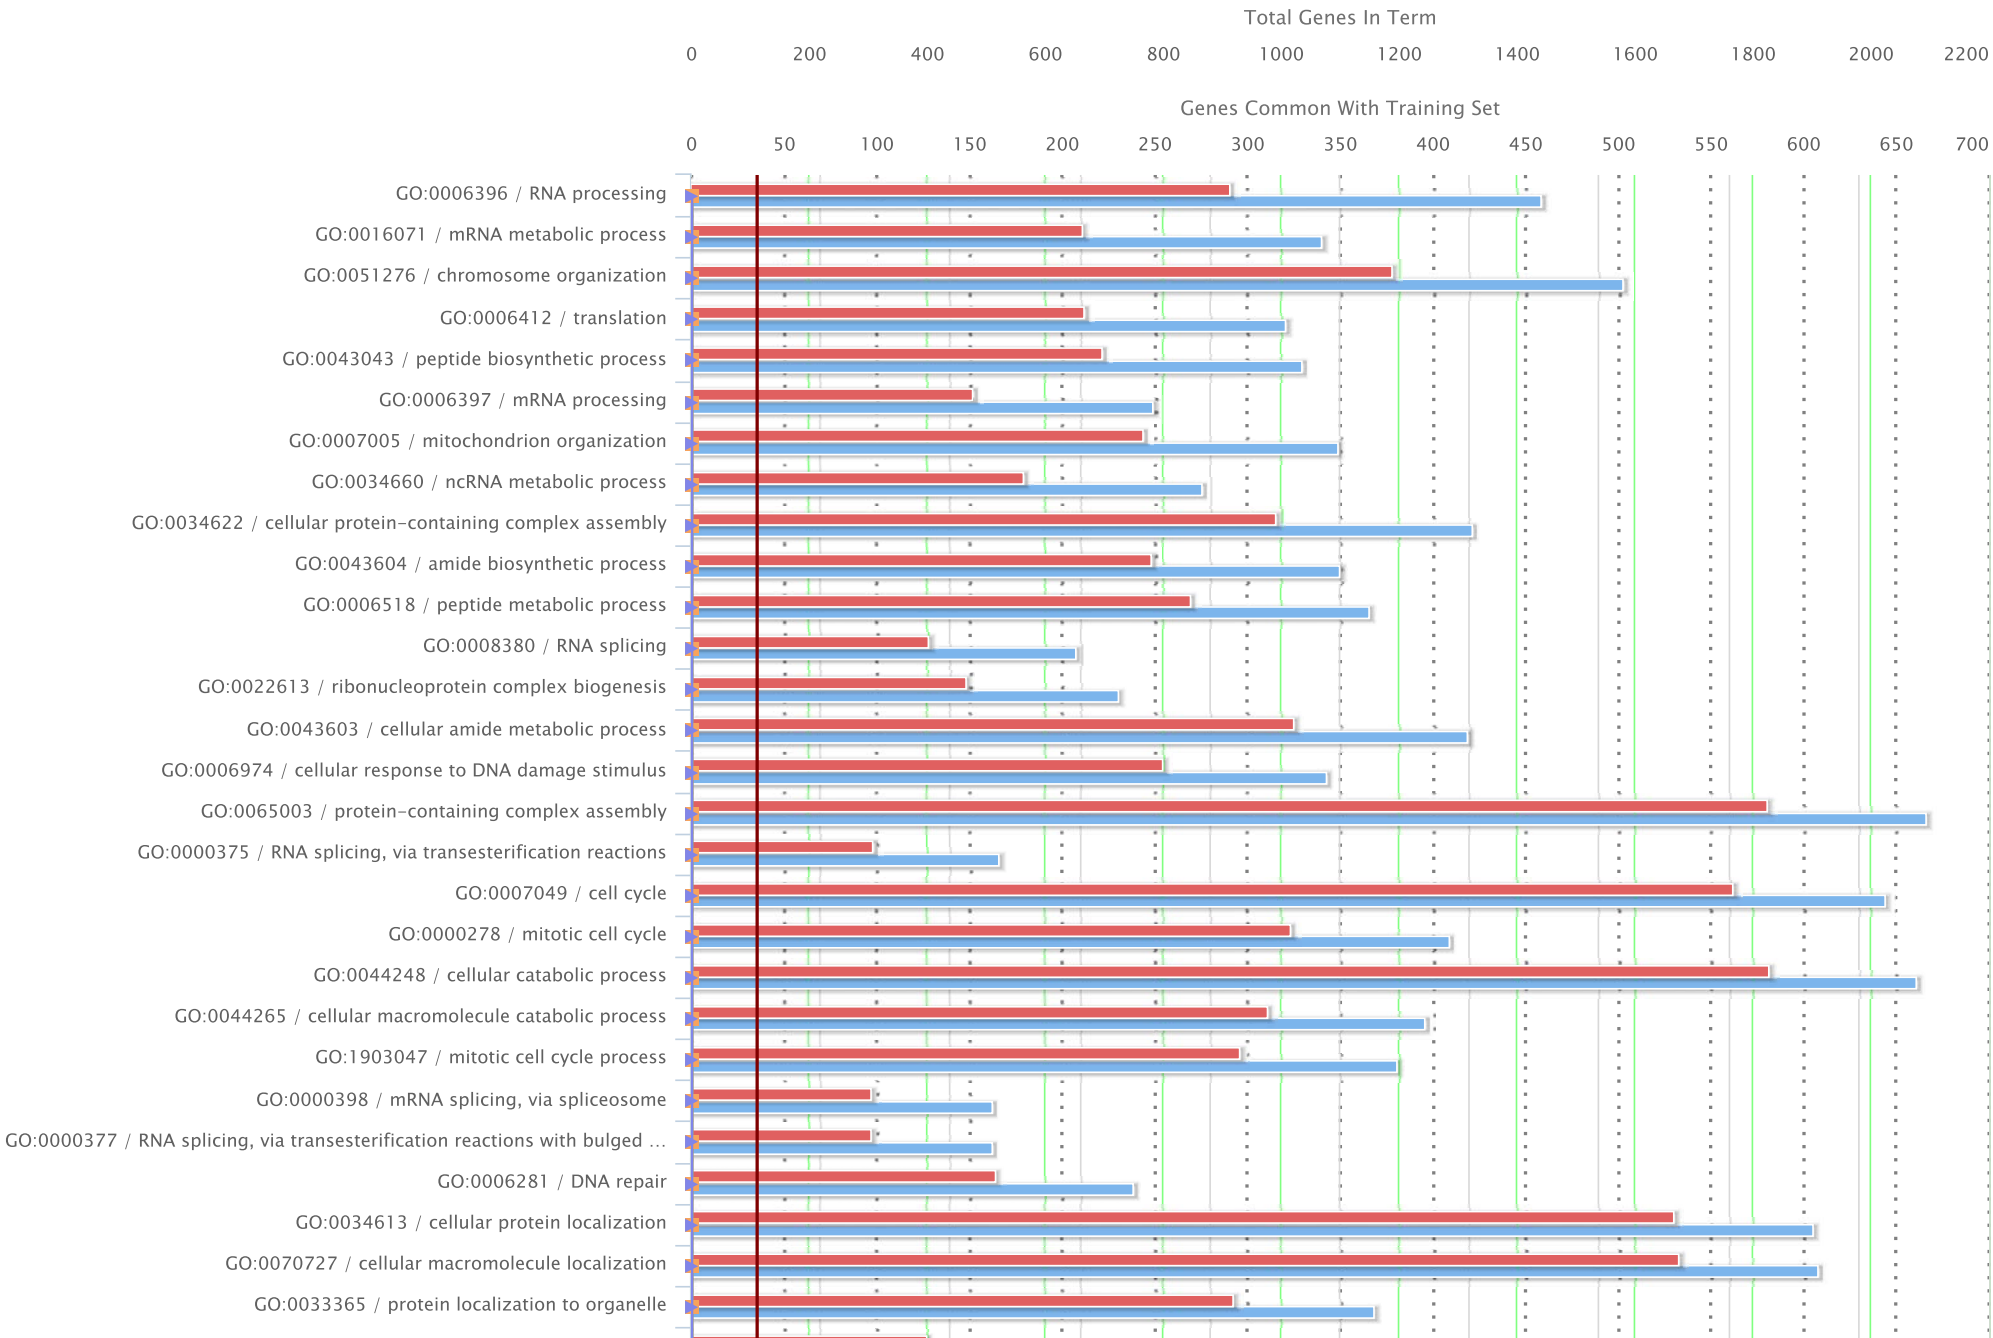

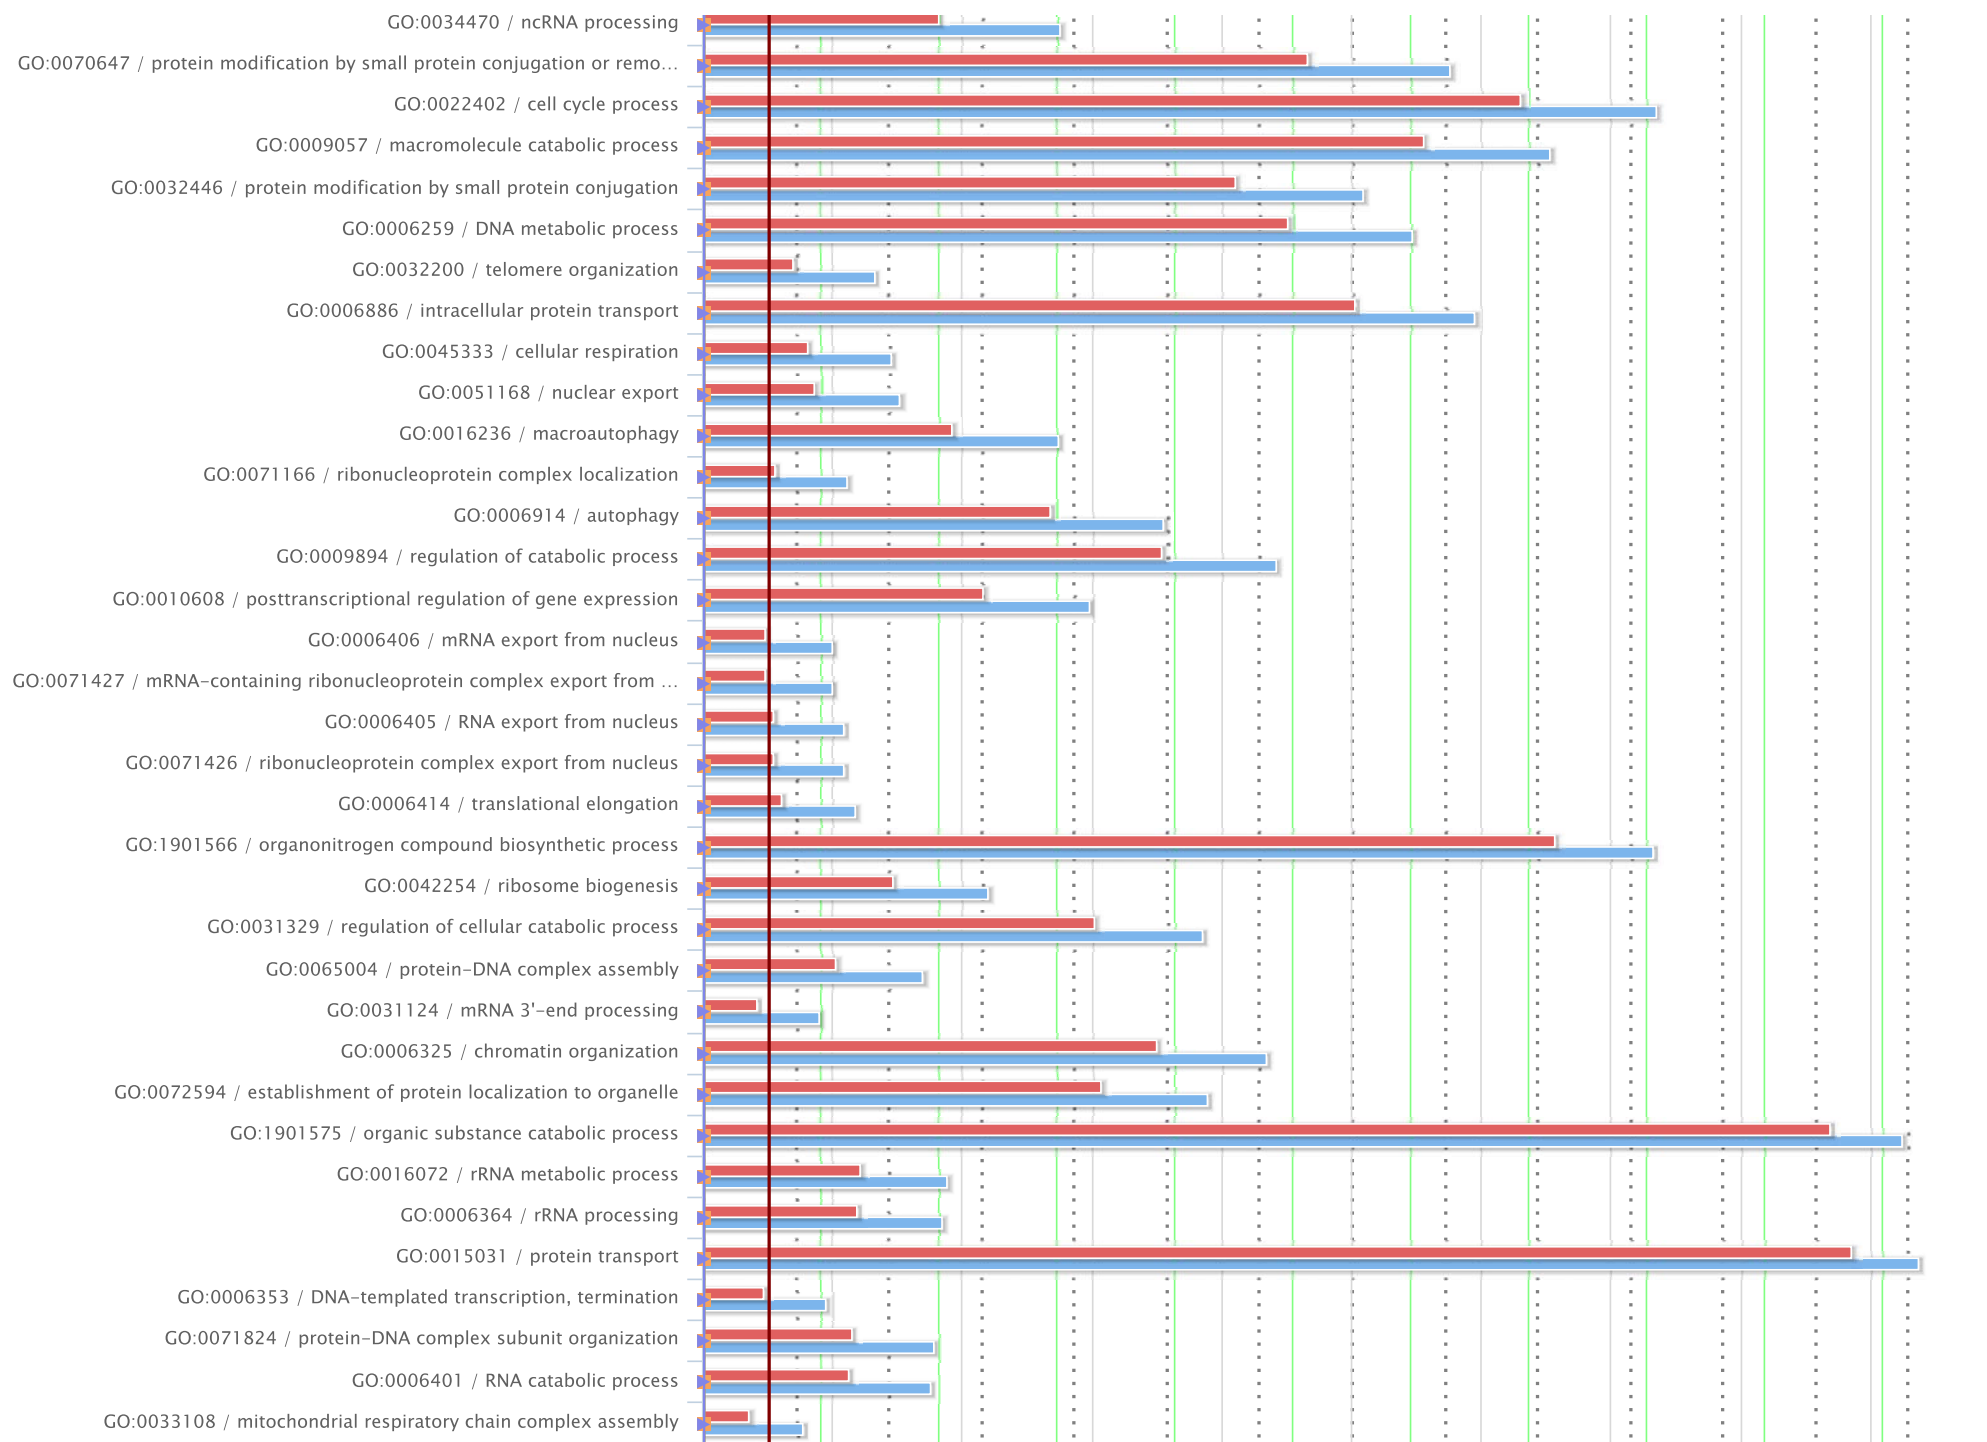

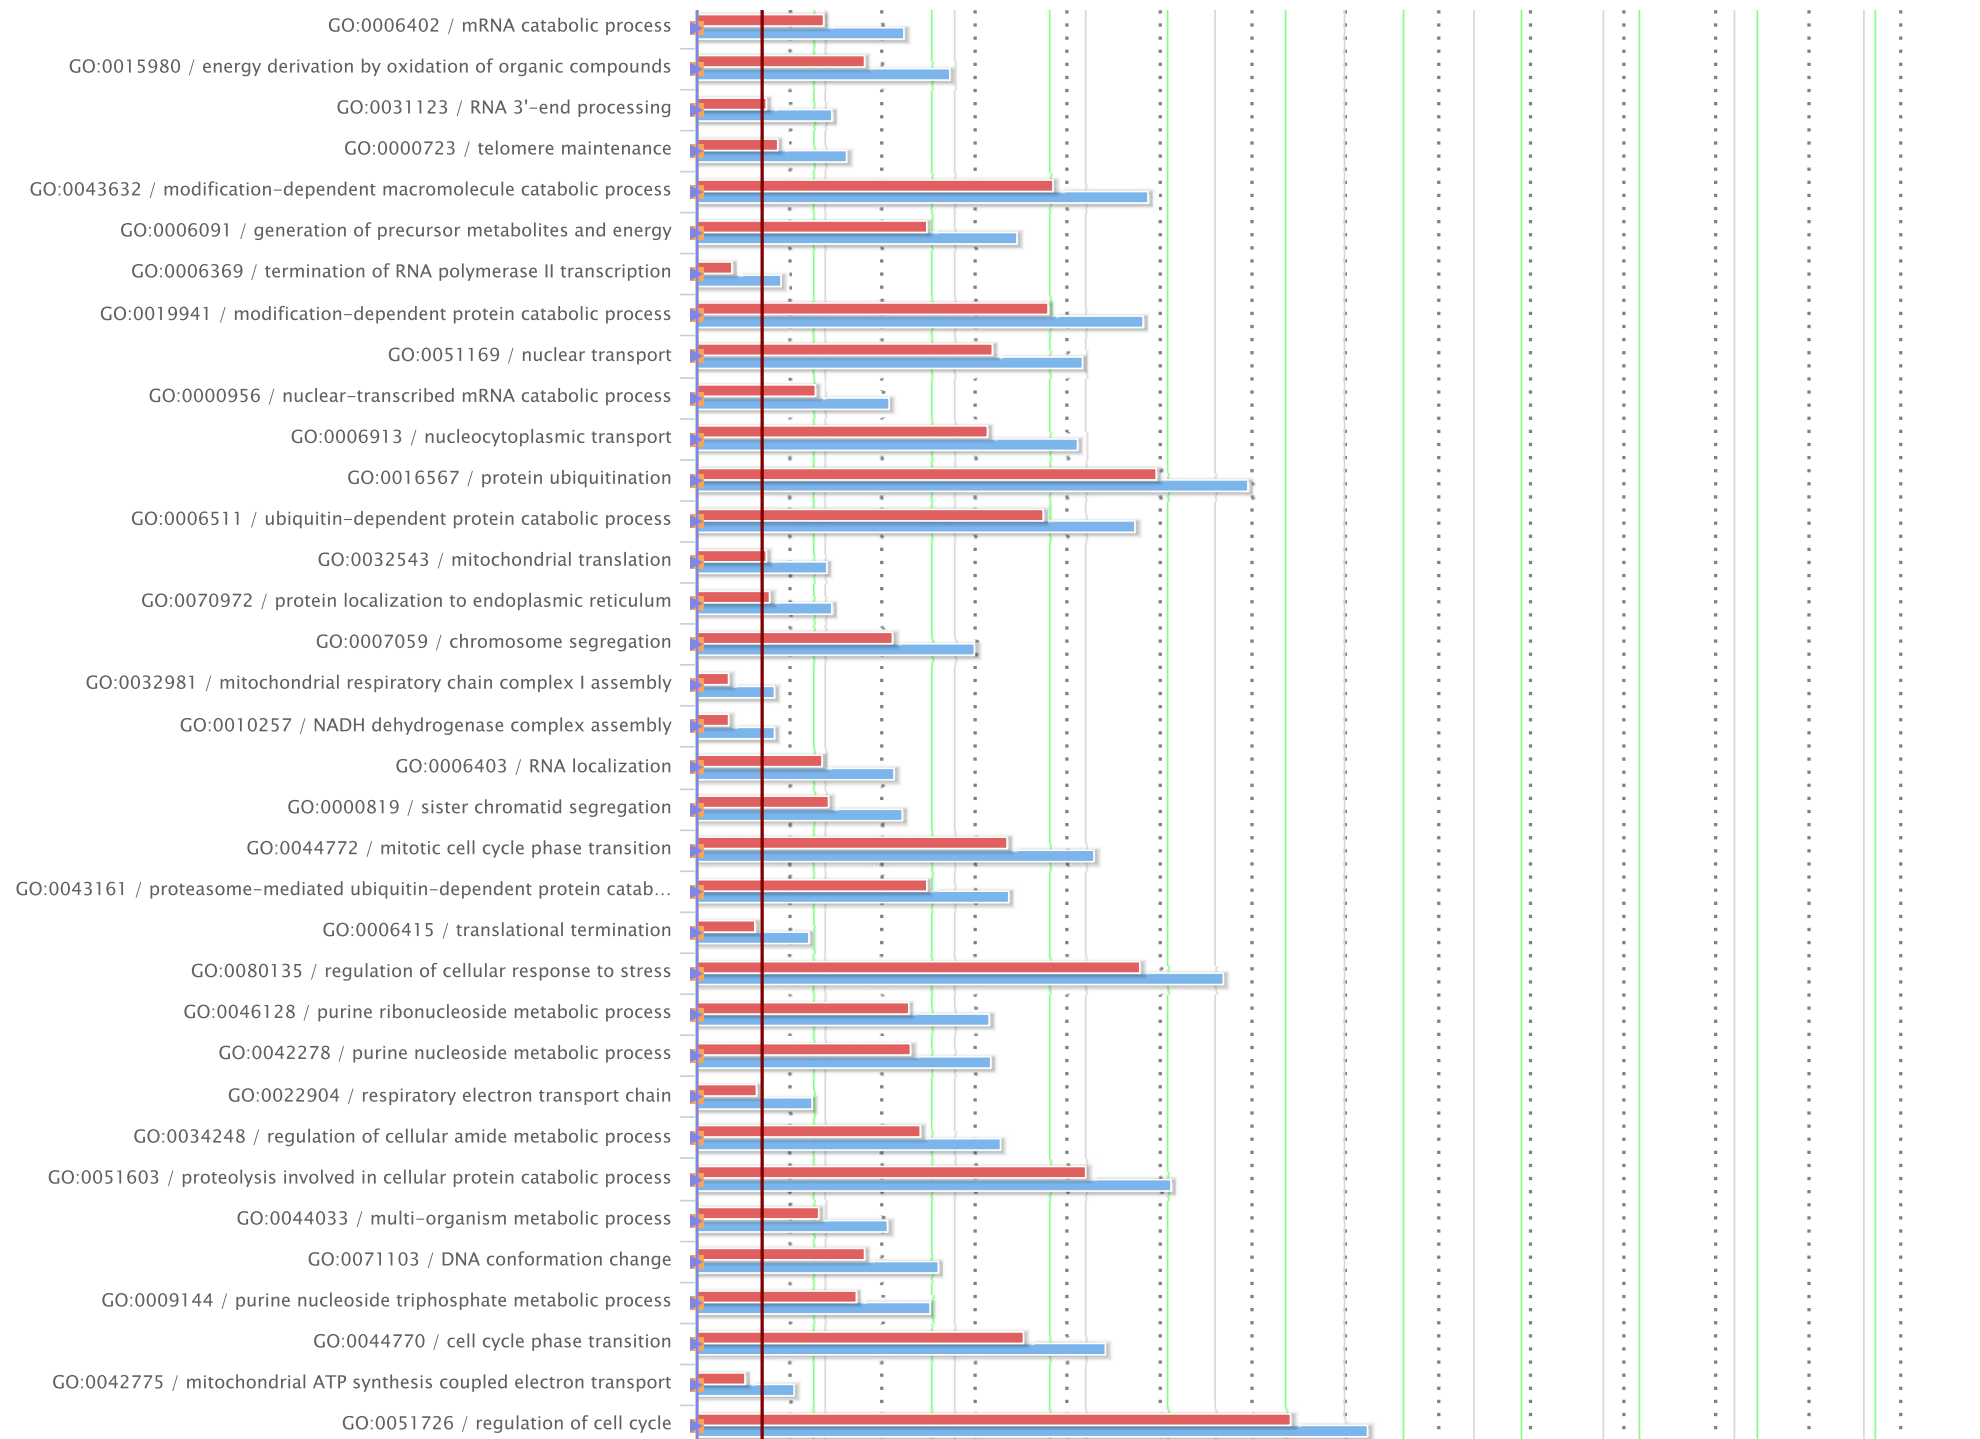

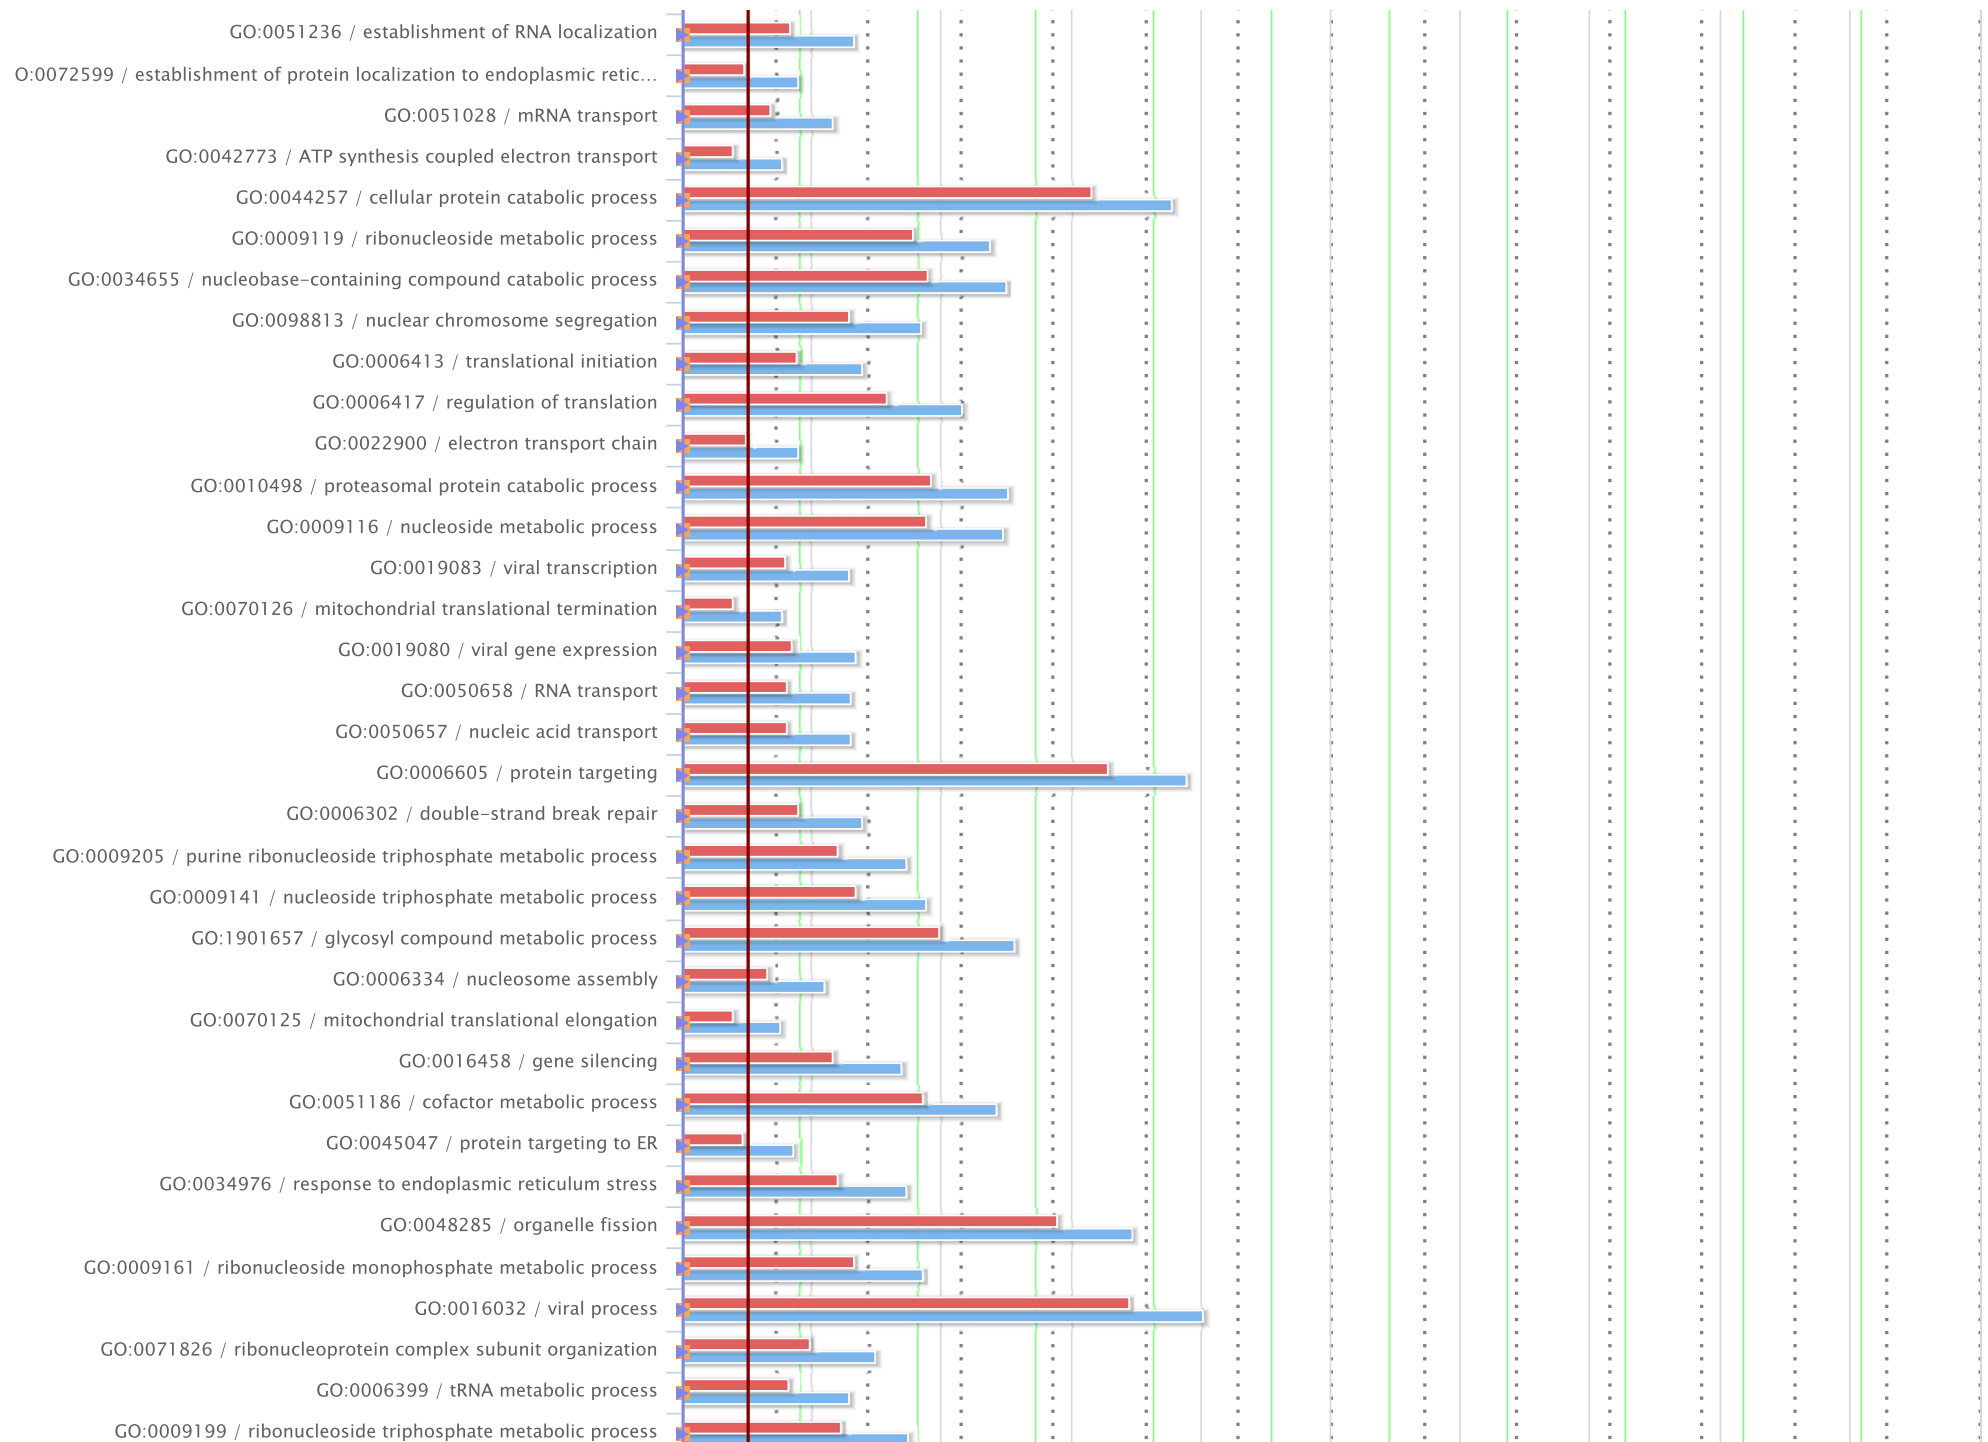

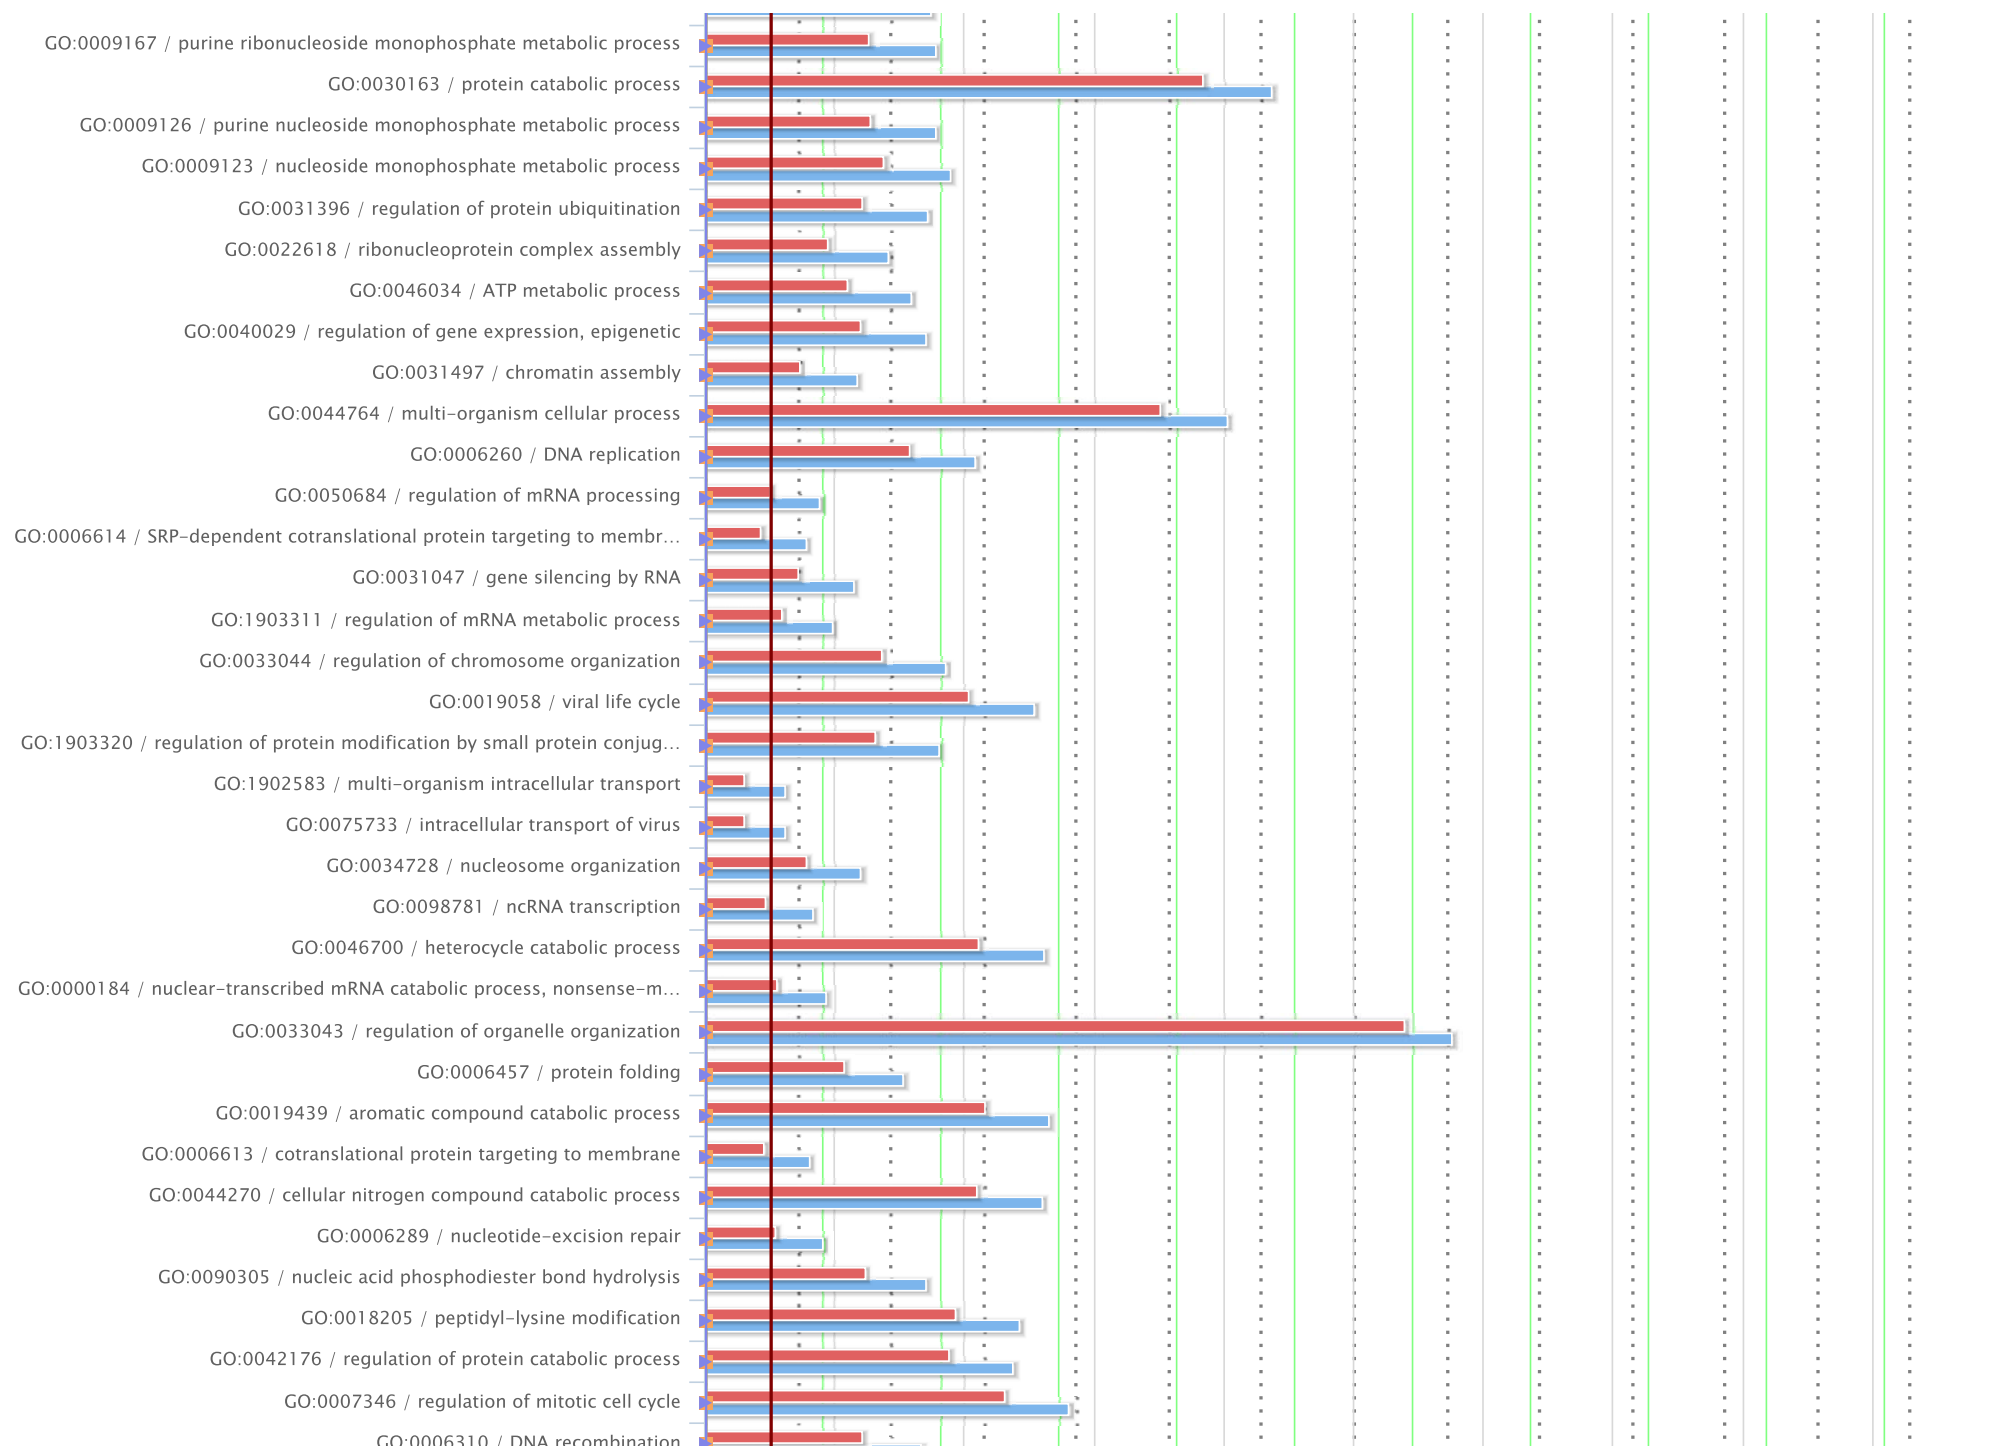

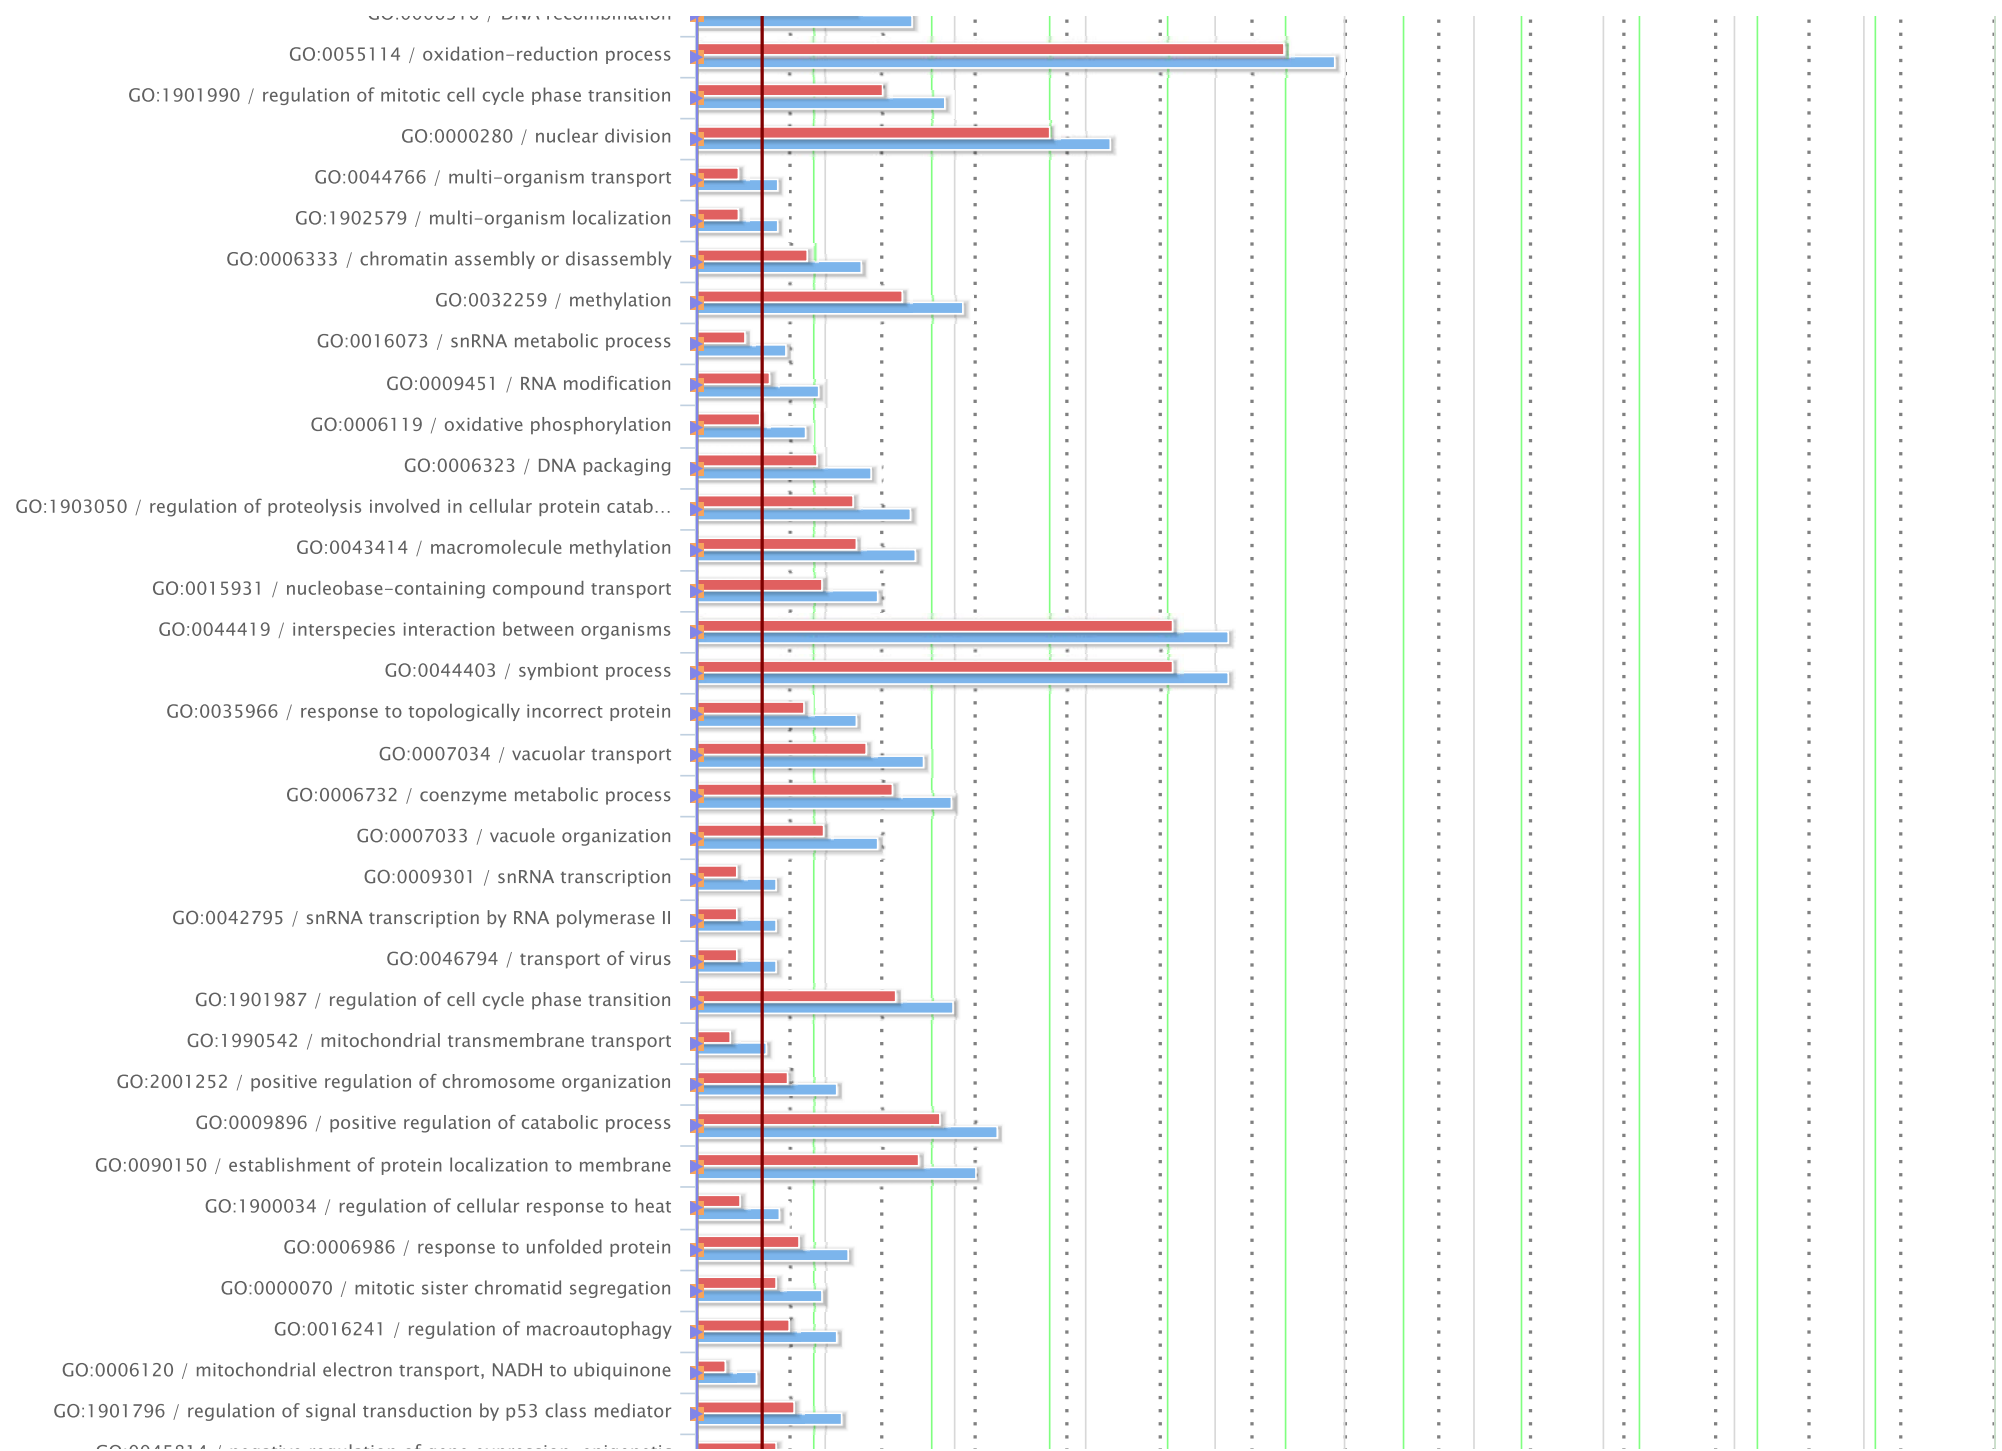

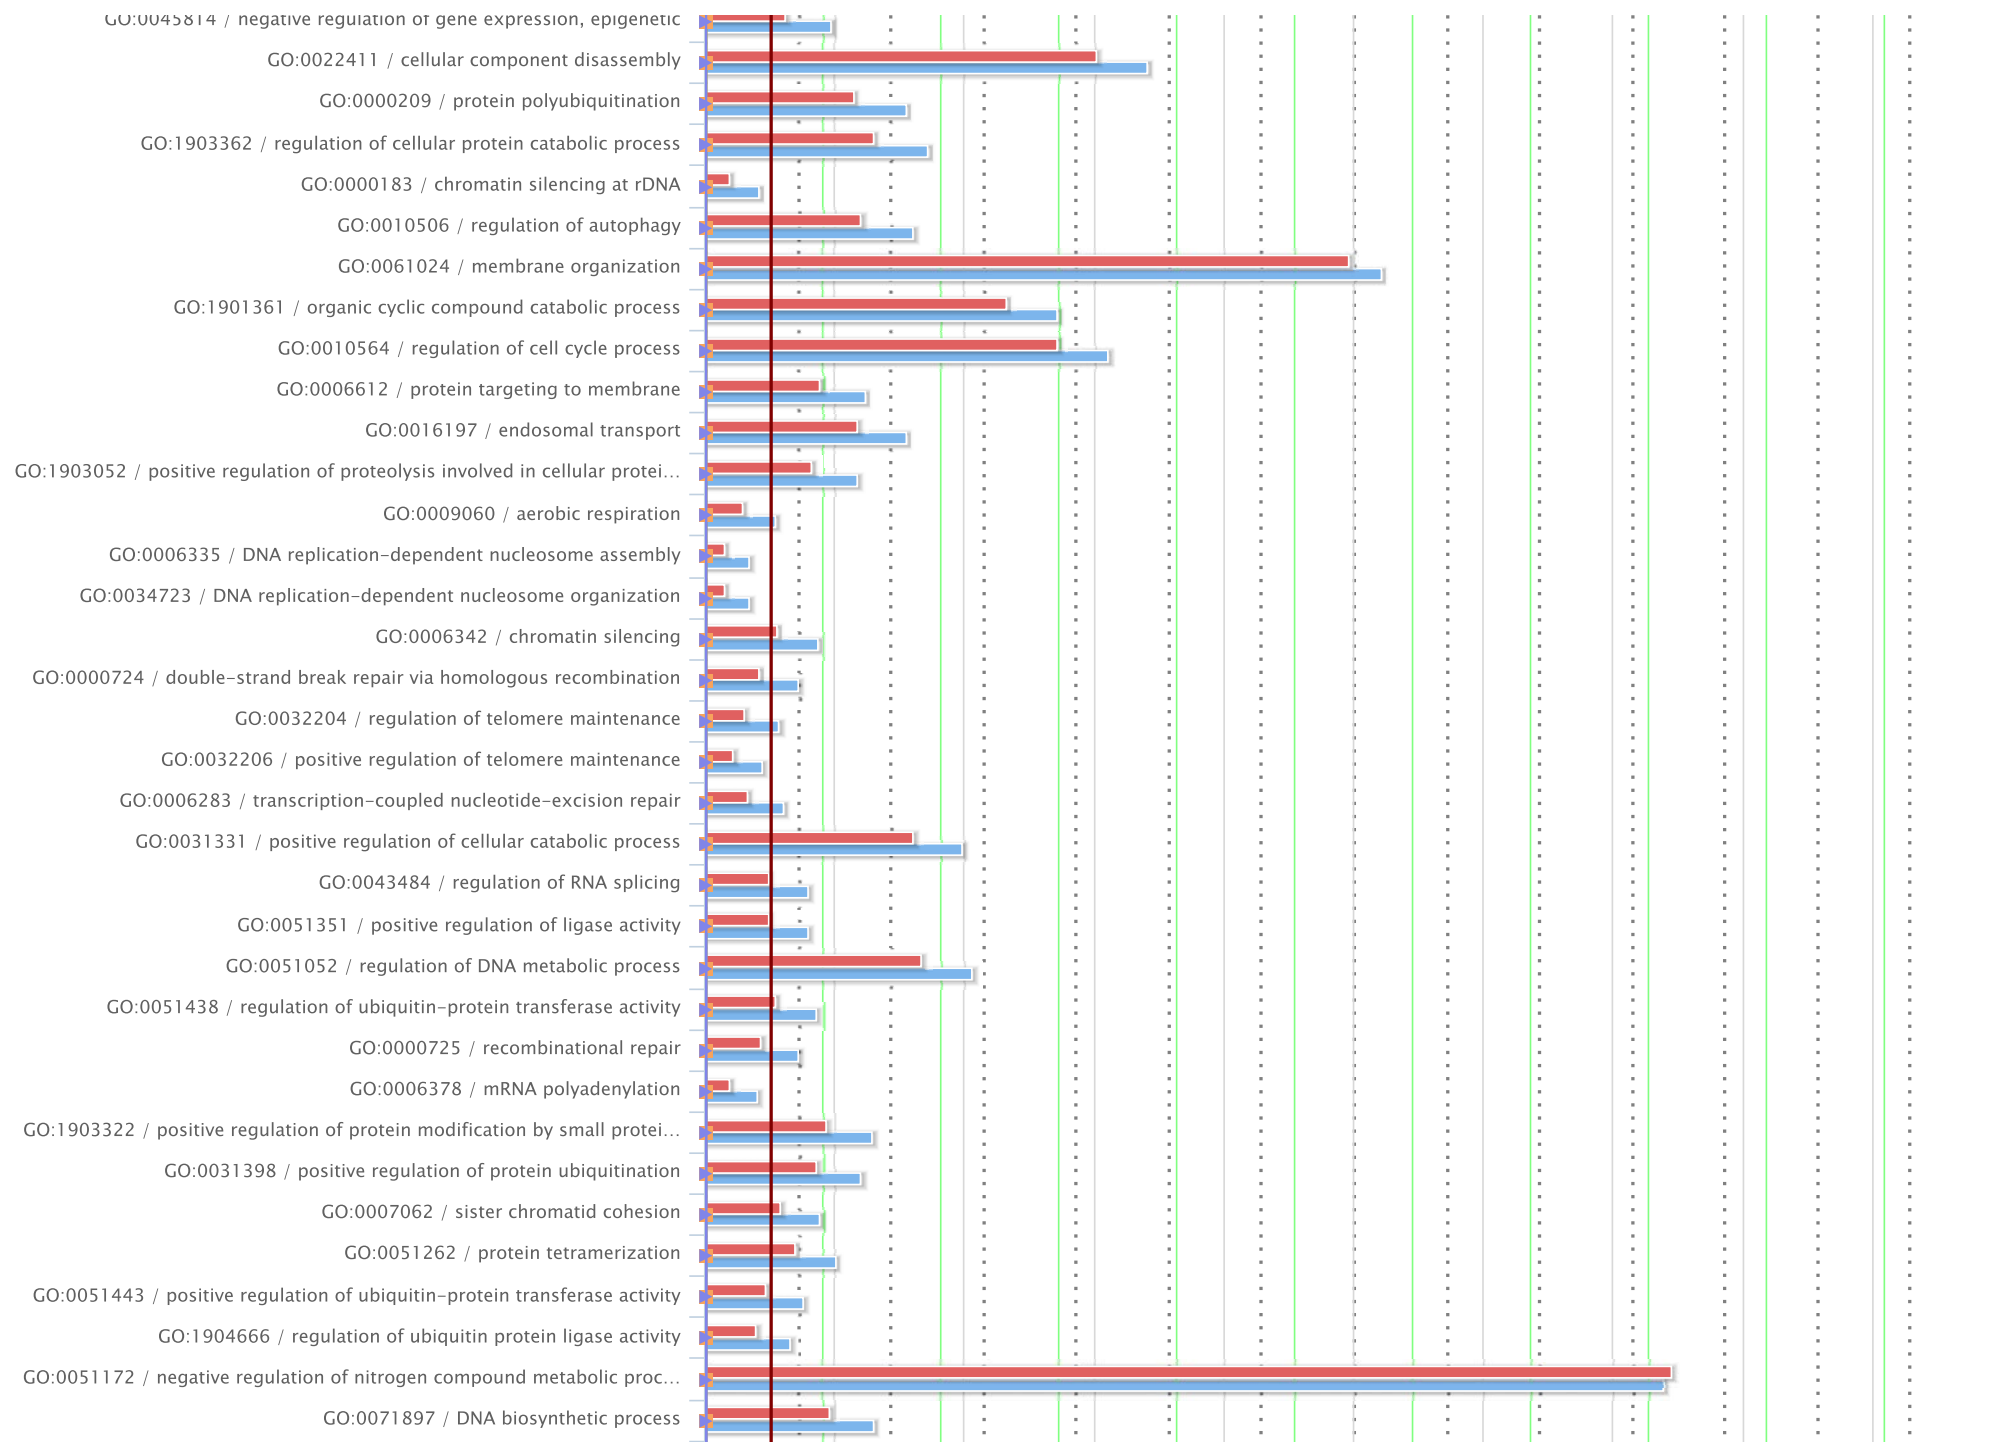

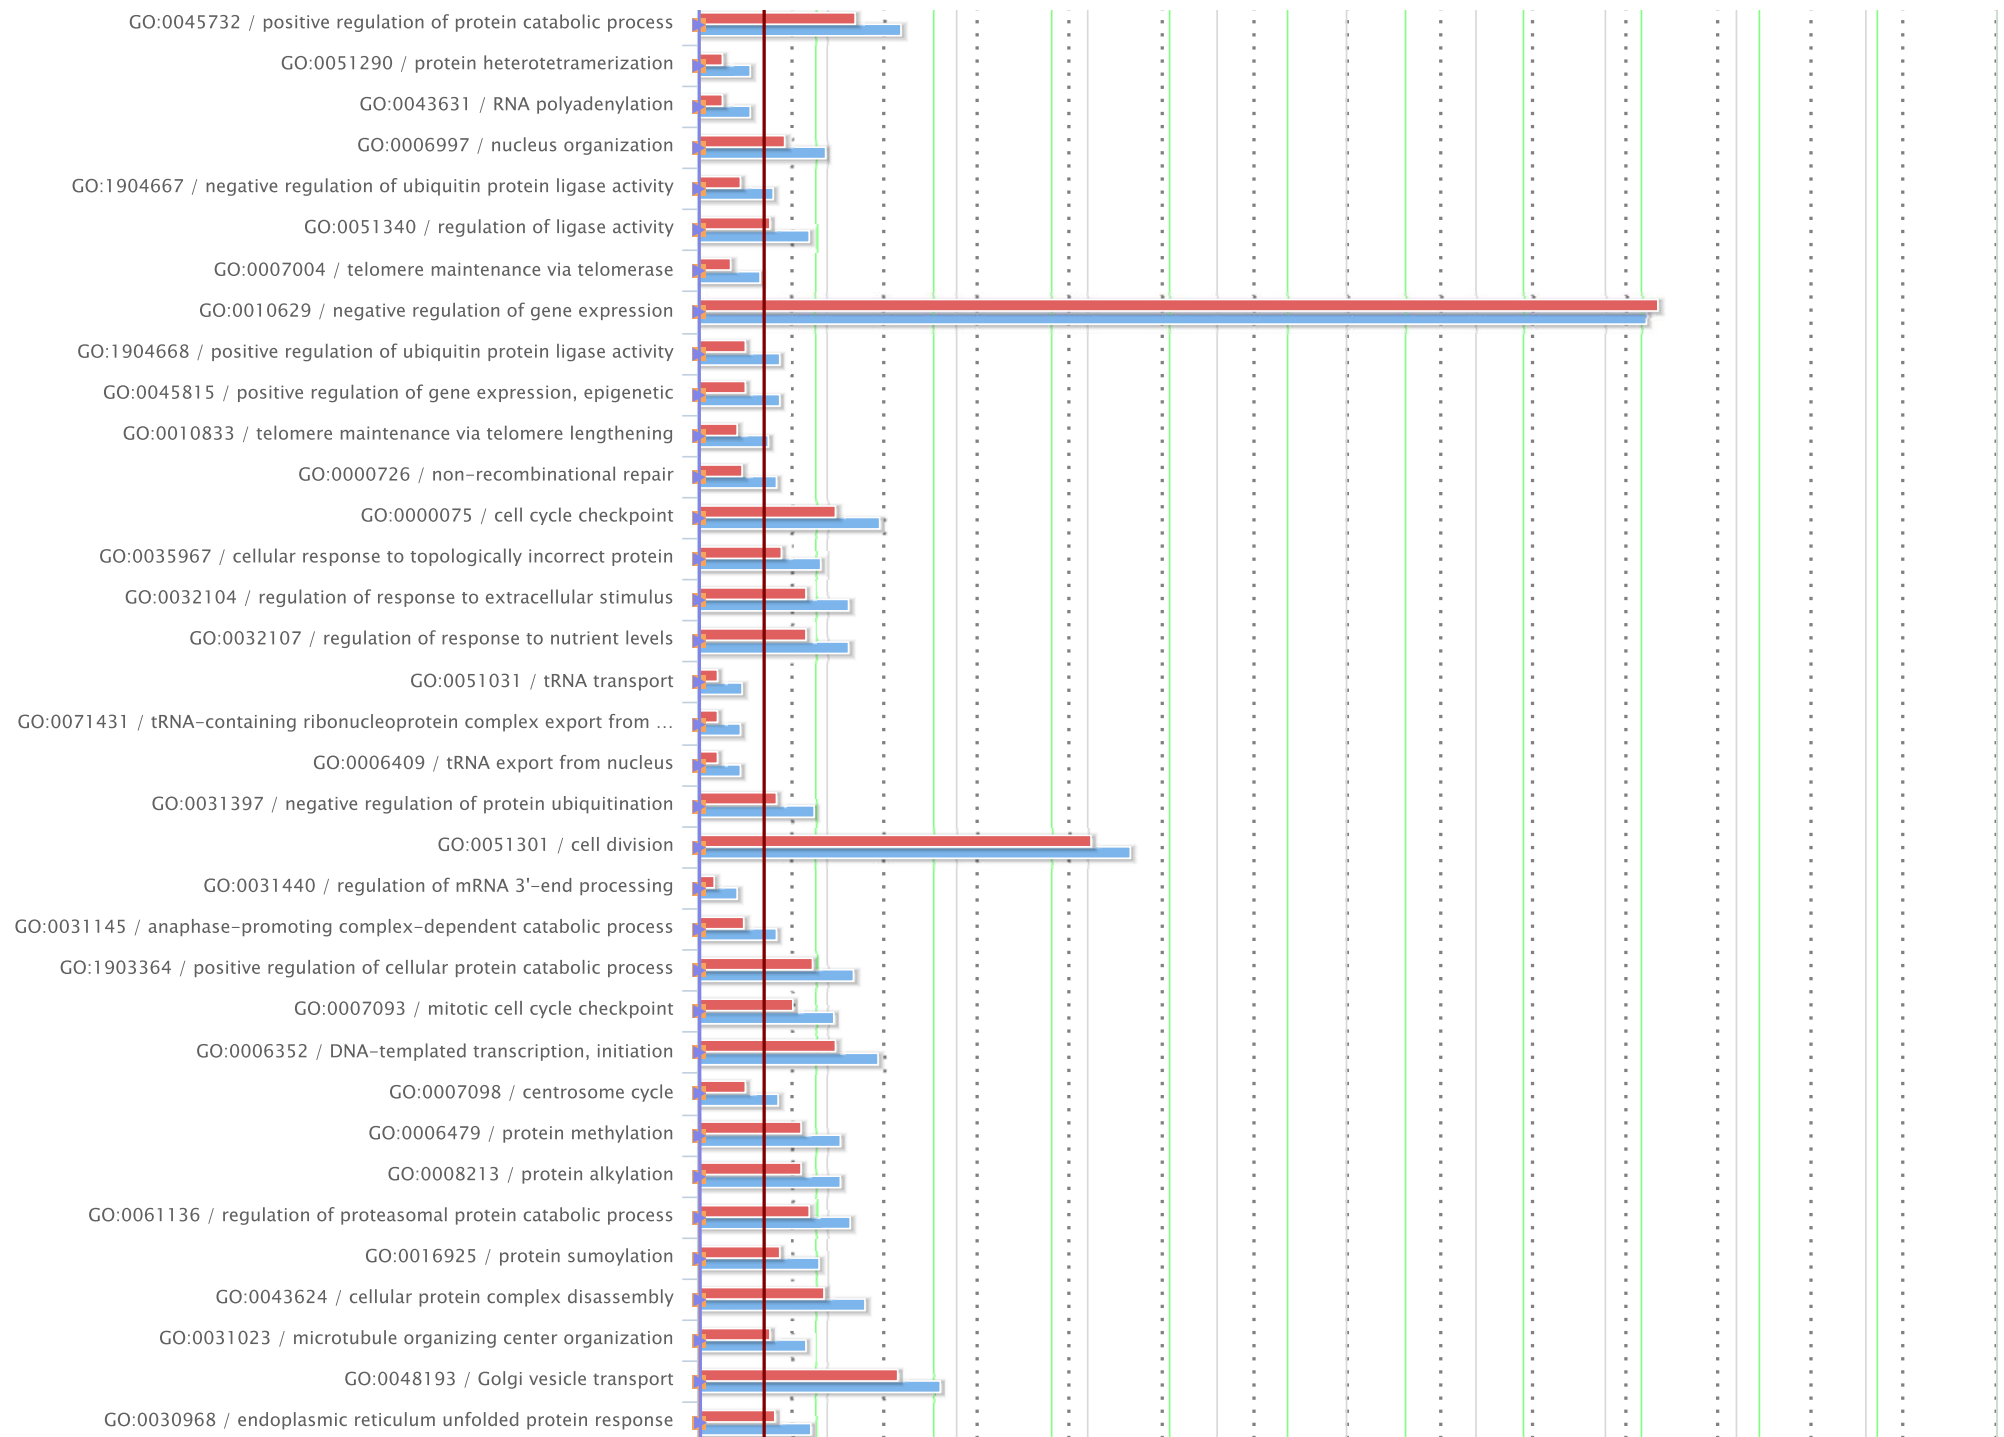

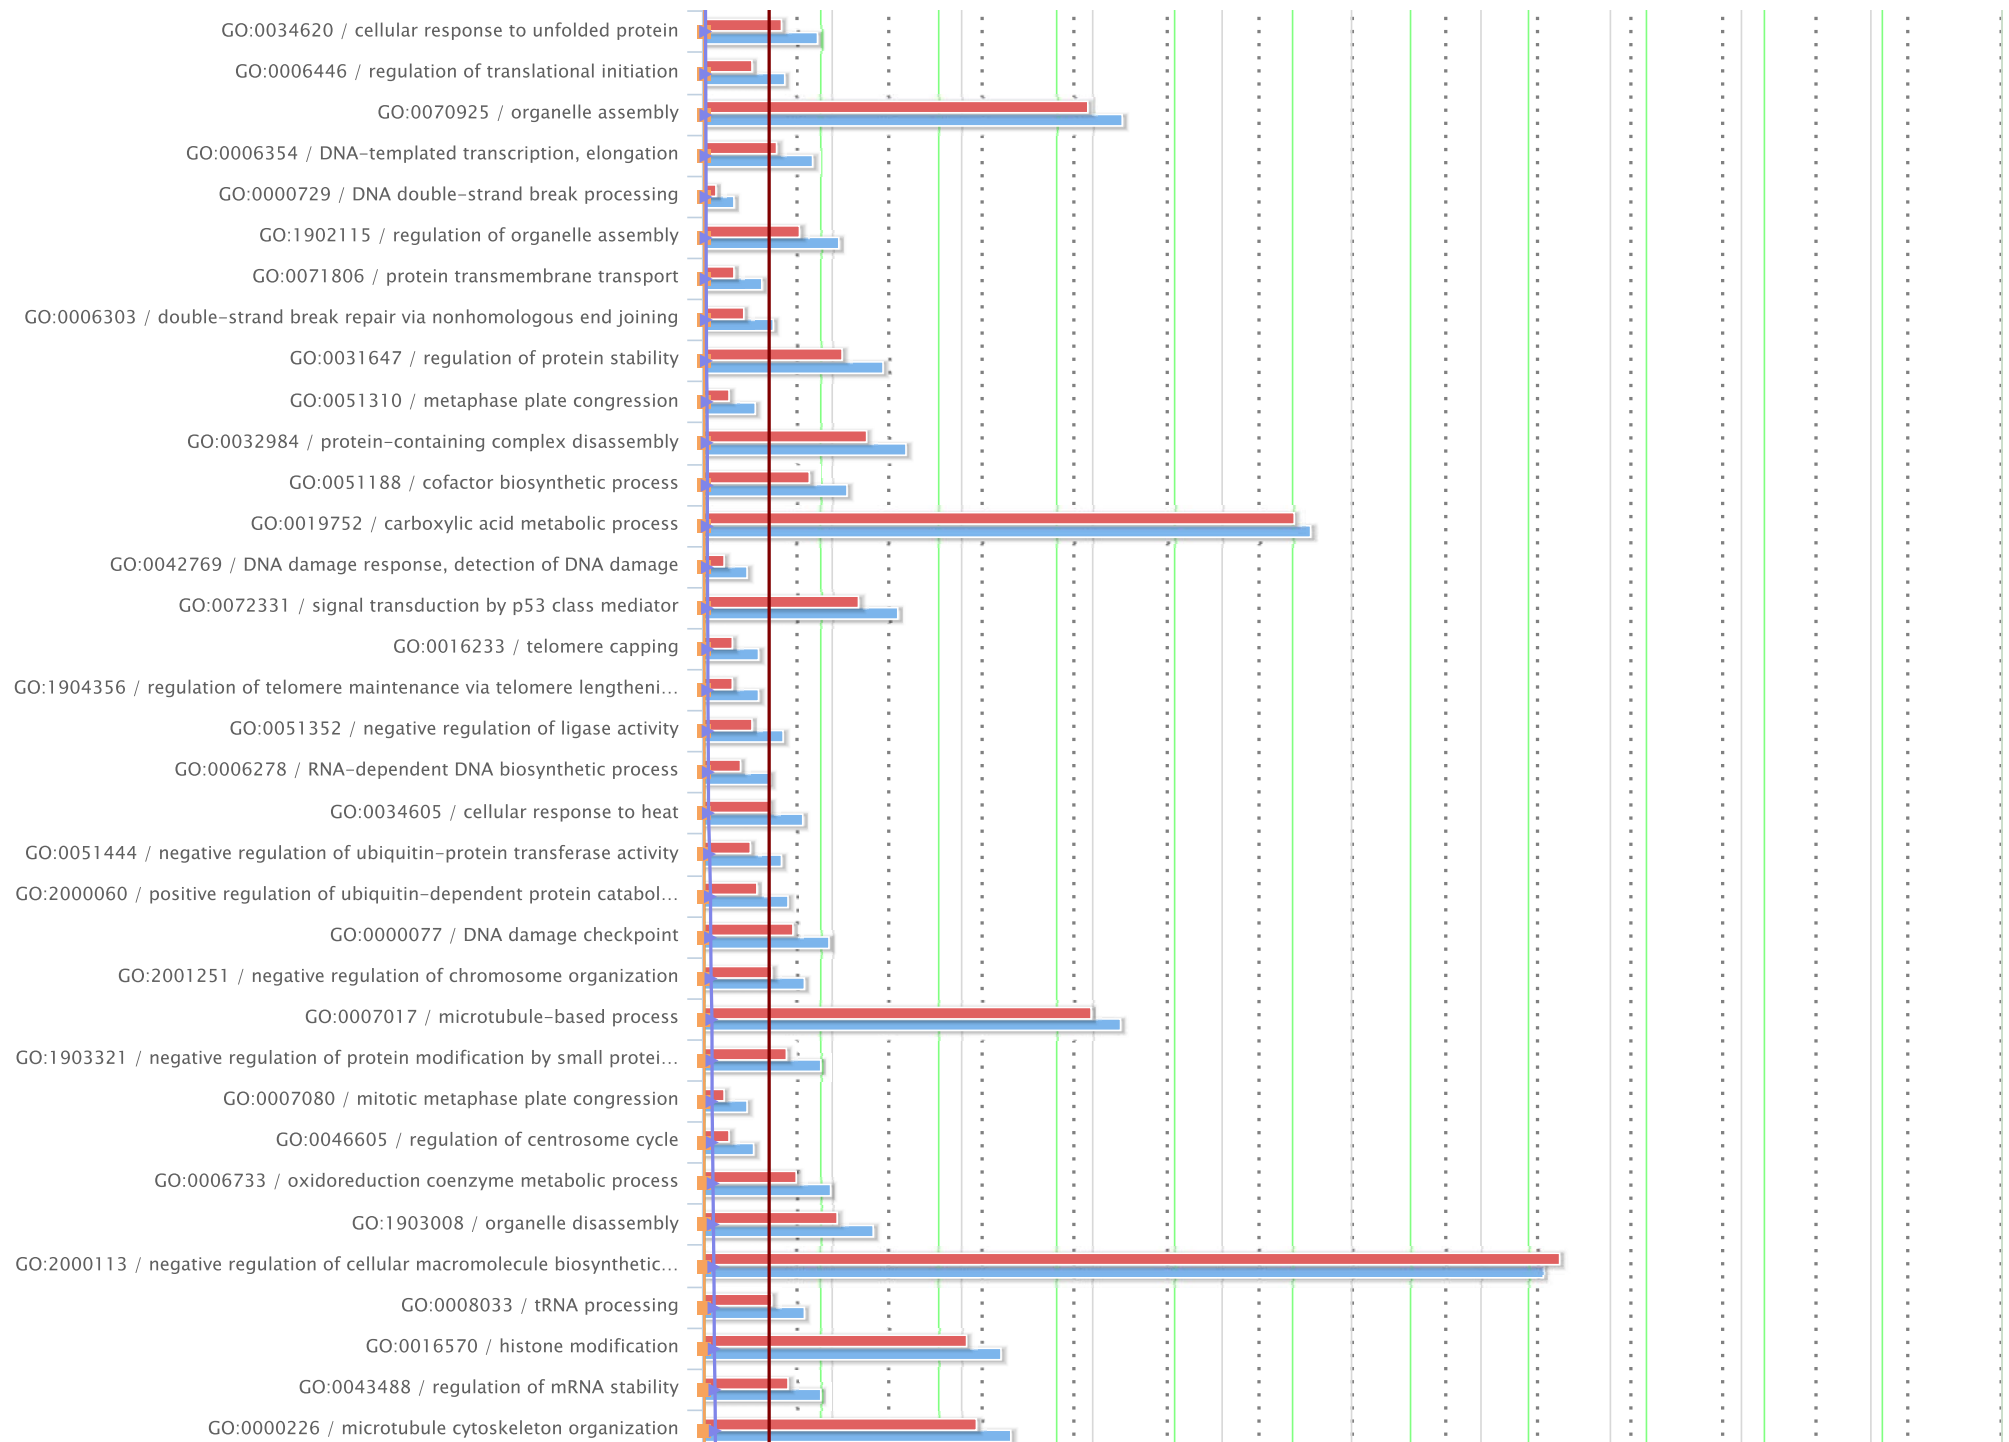

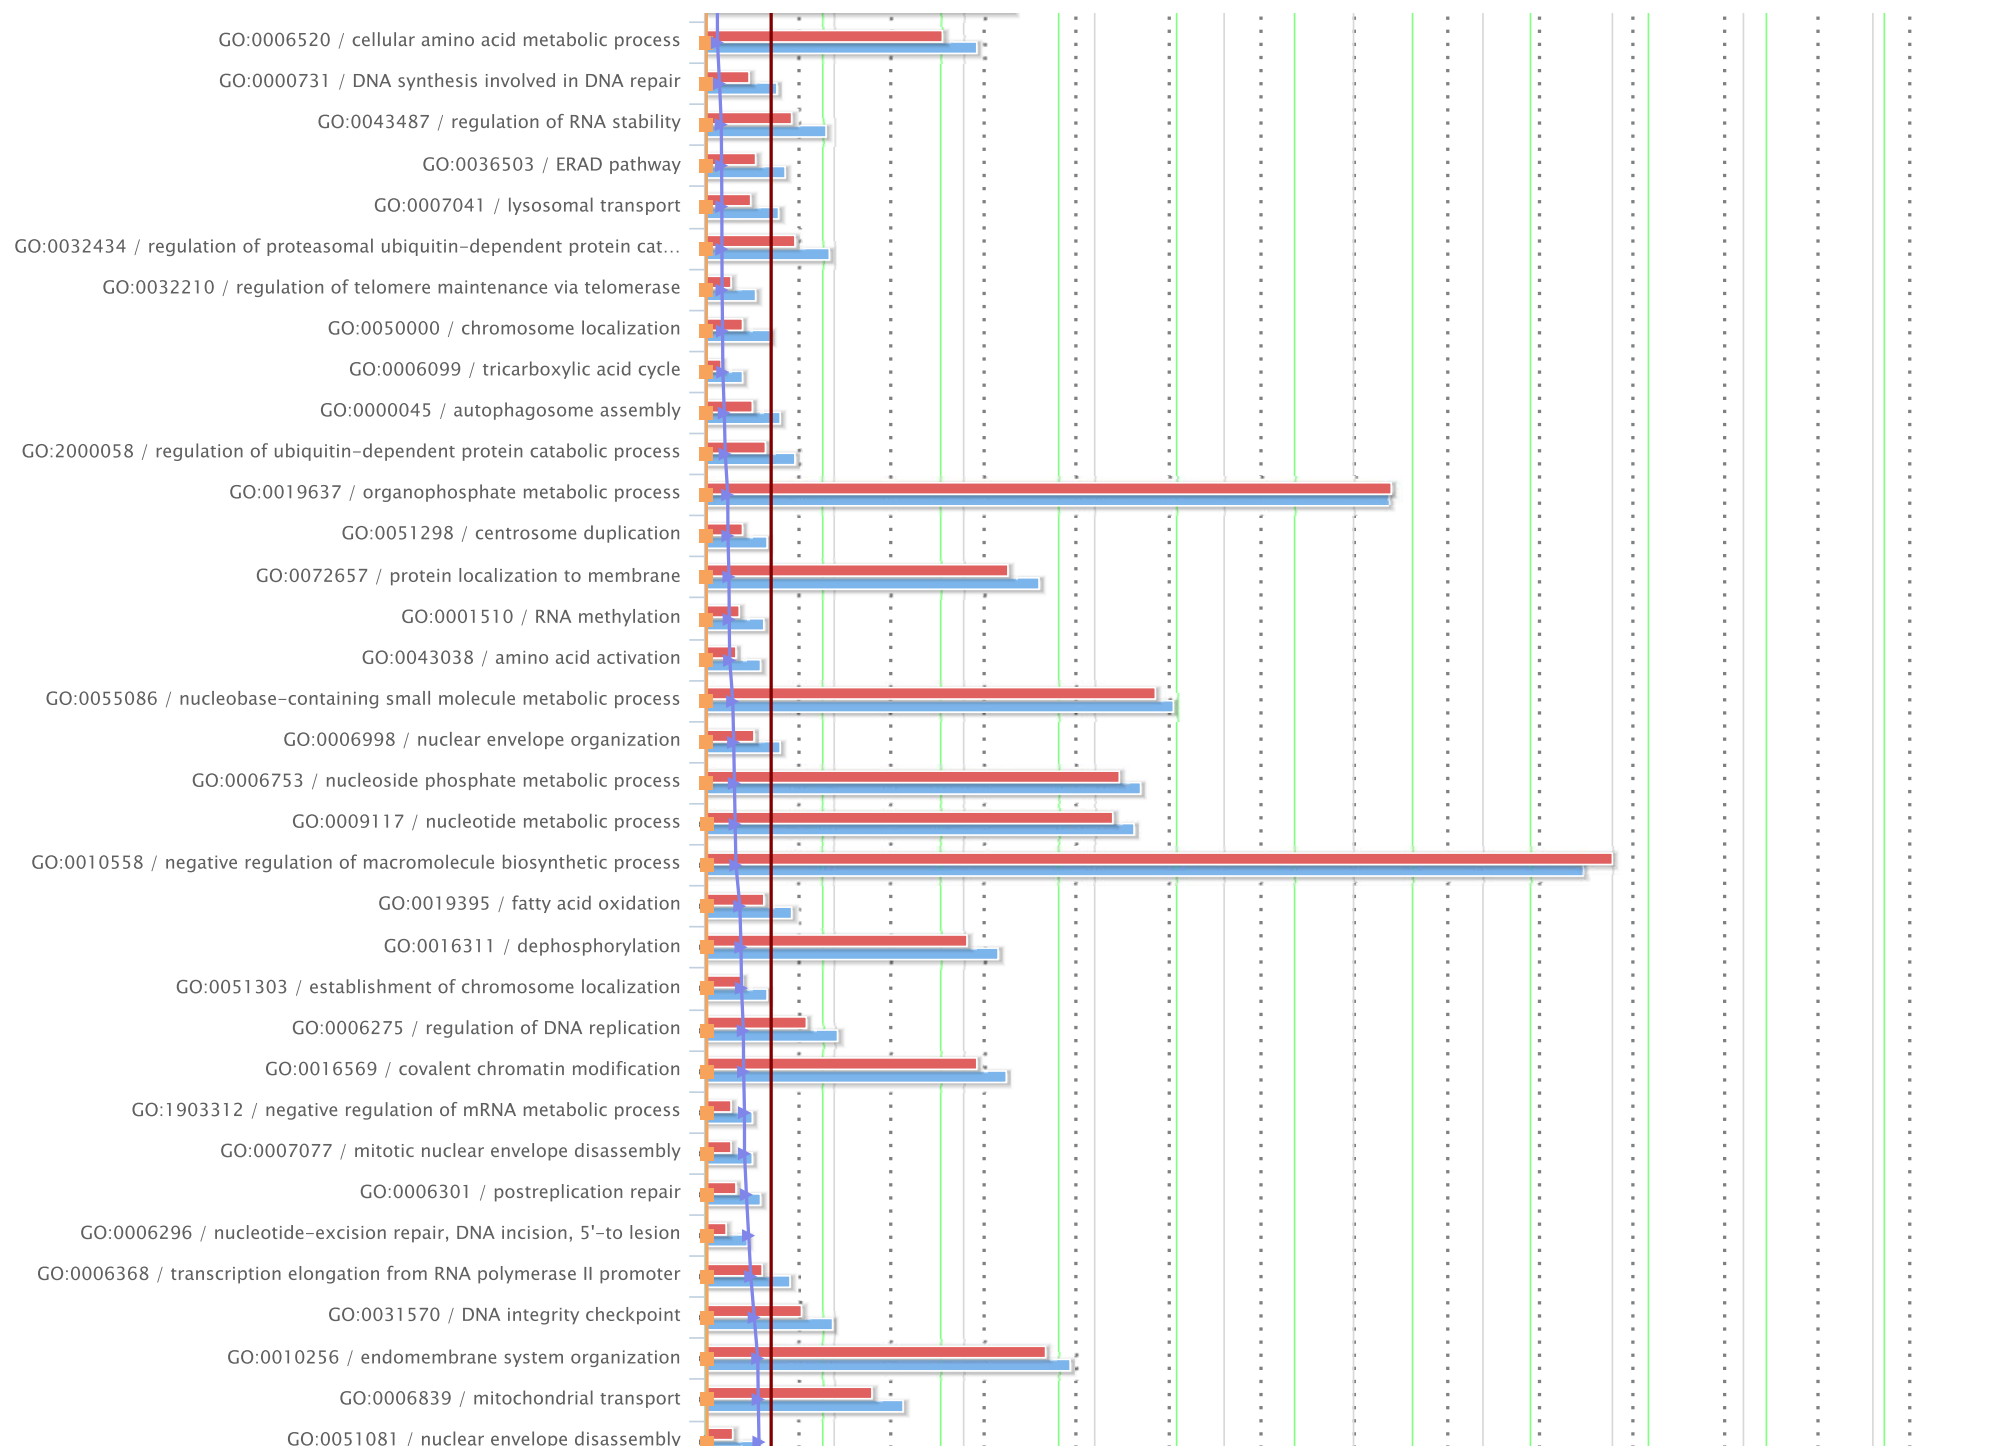

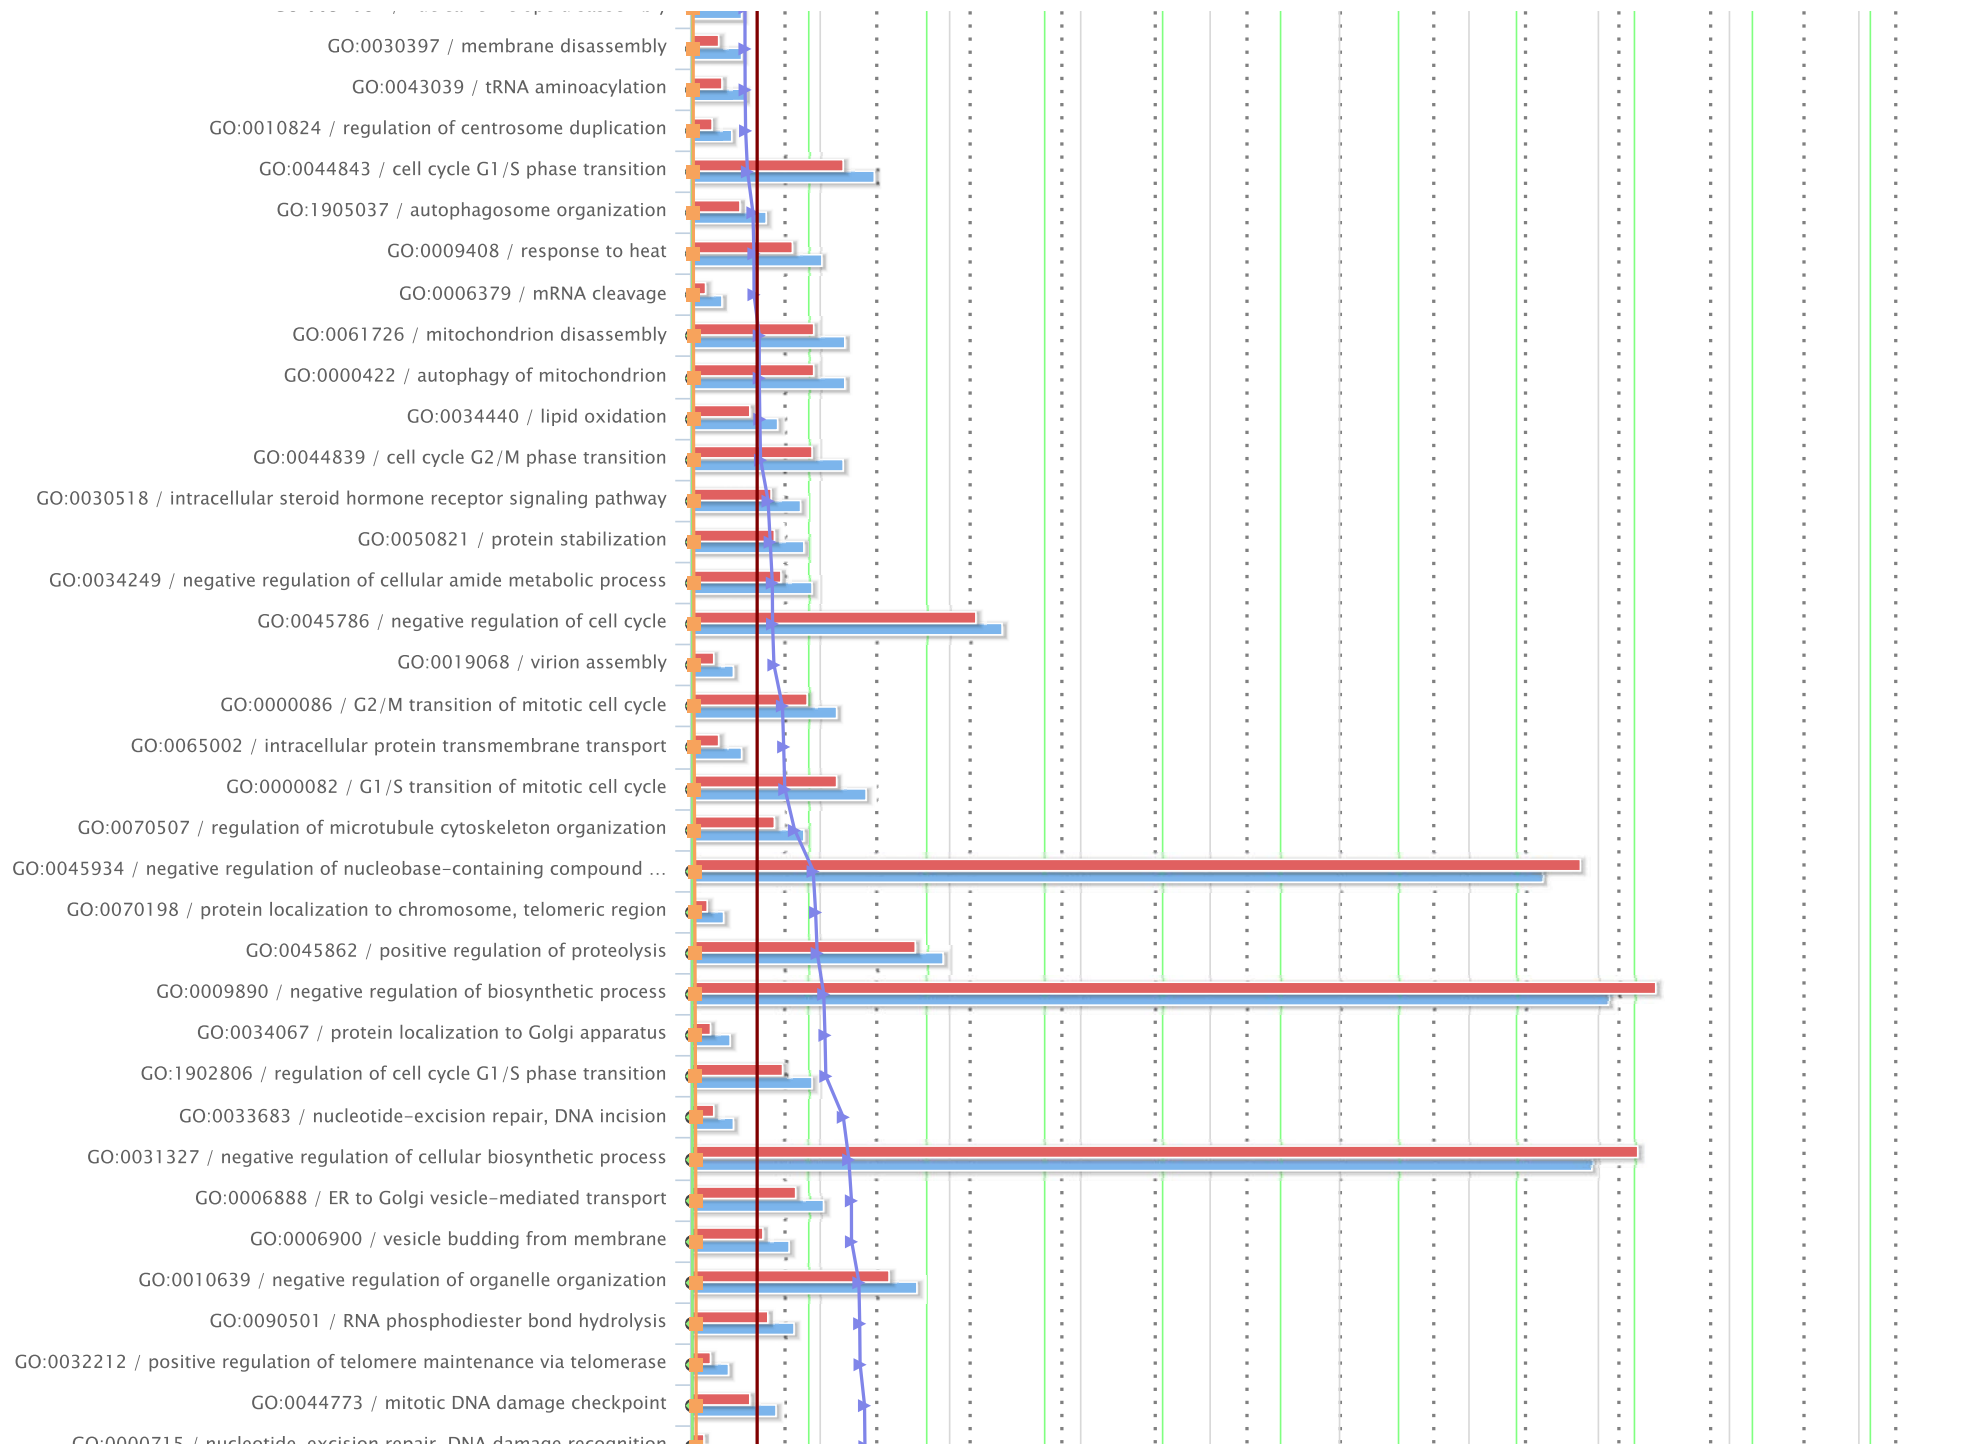

Feature Names

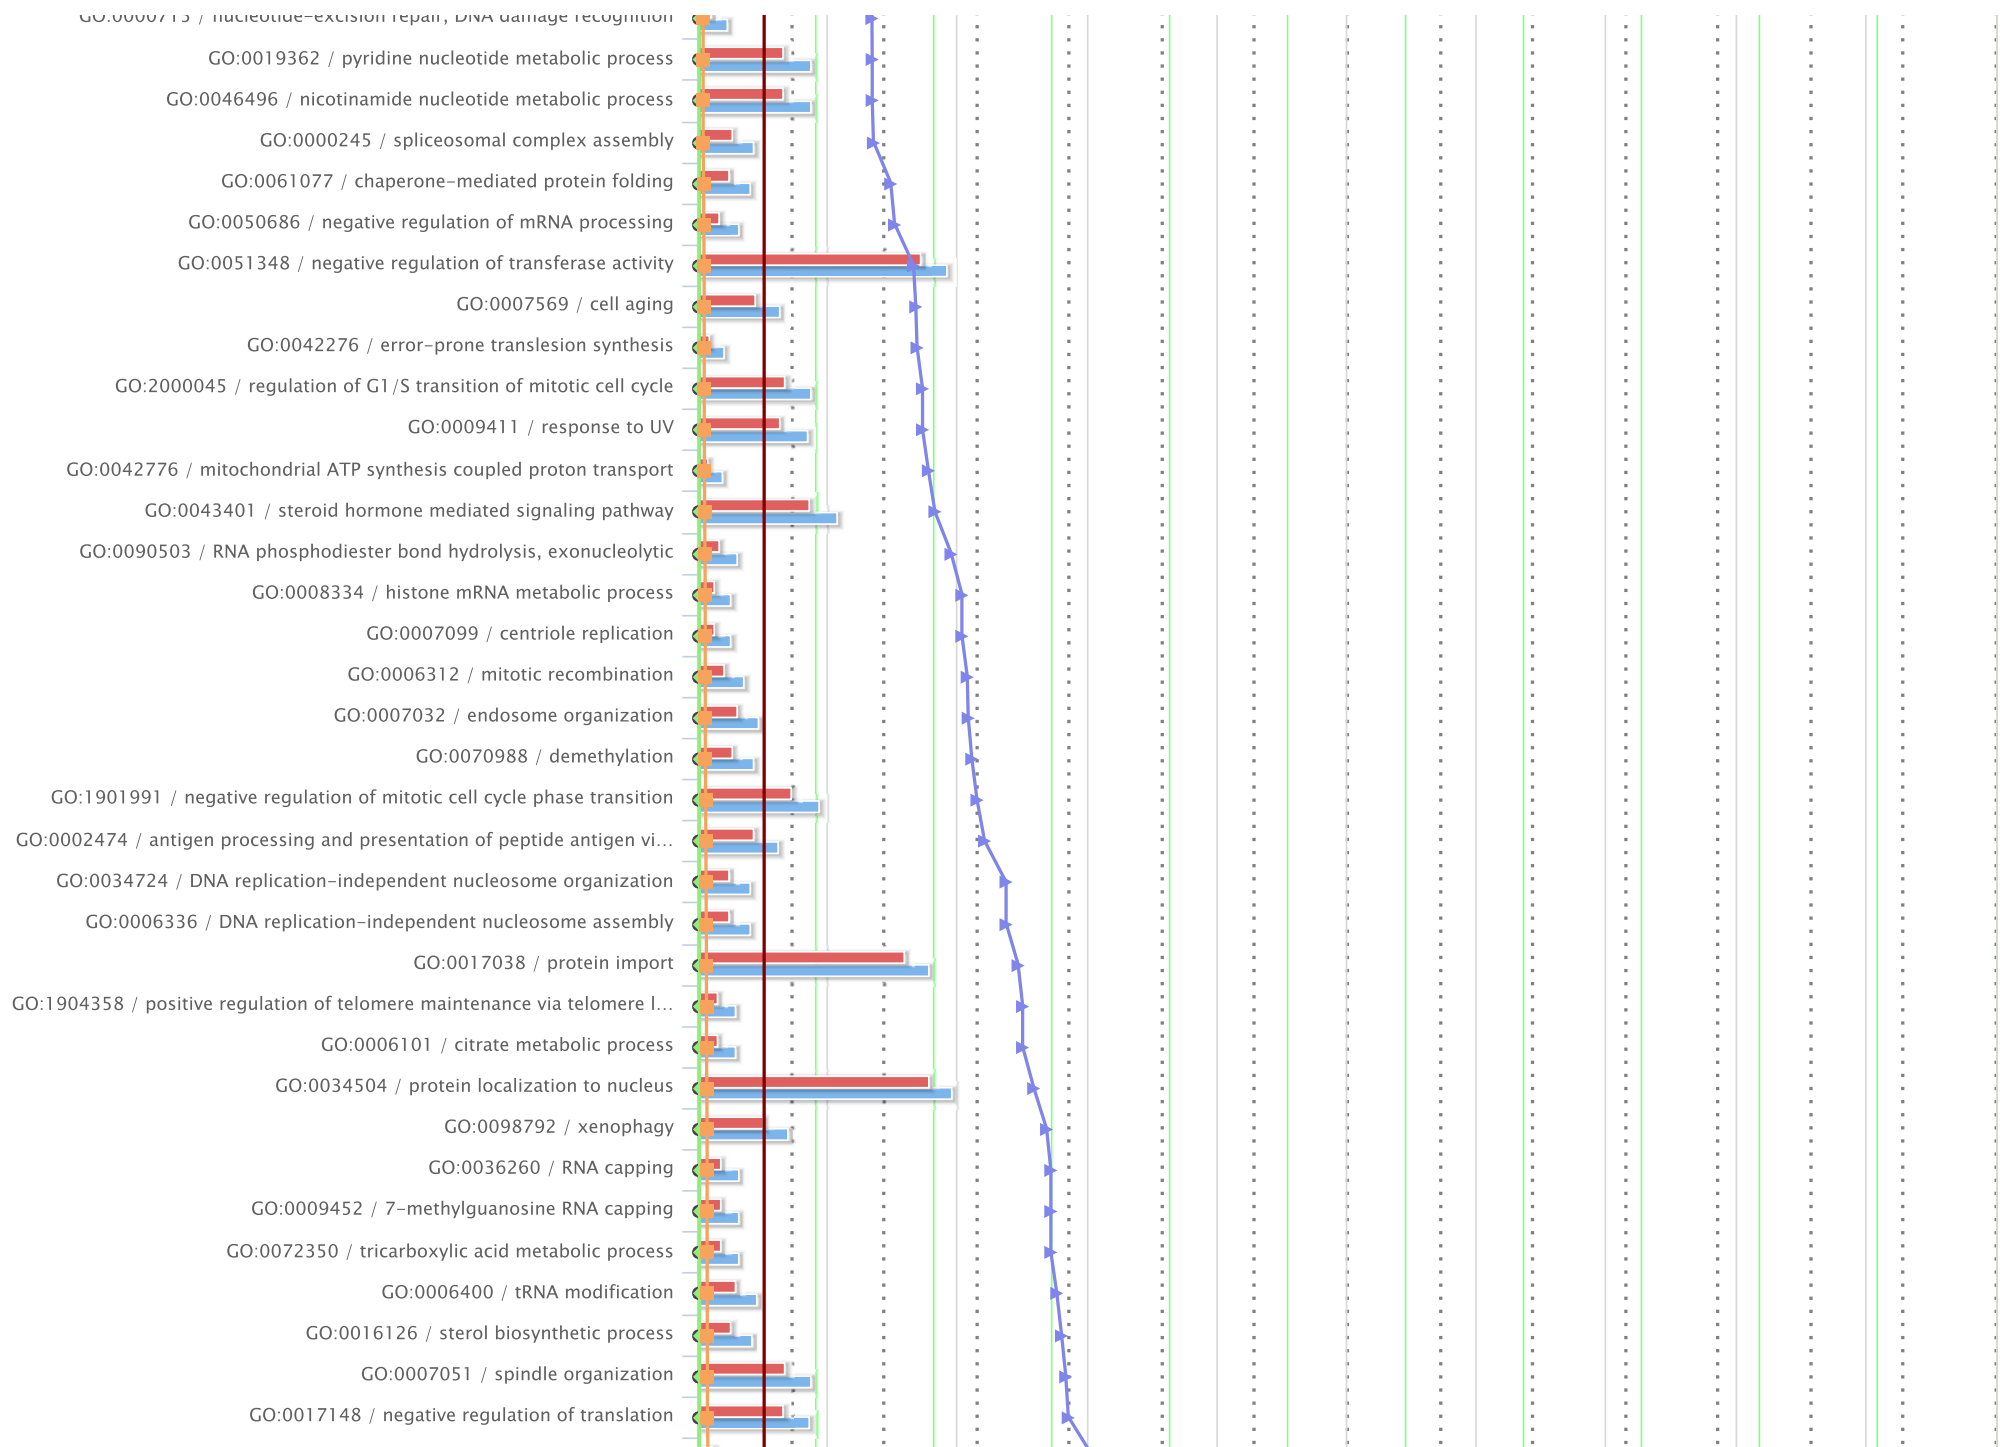

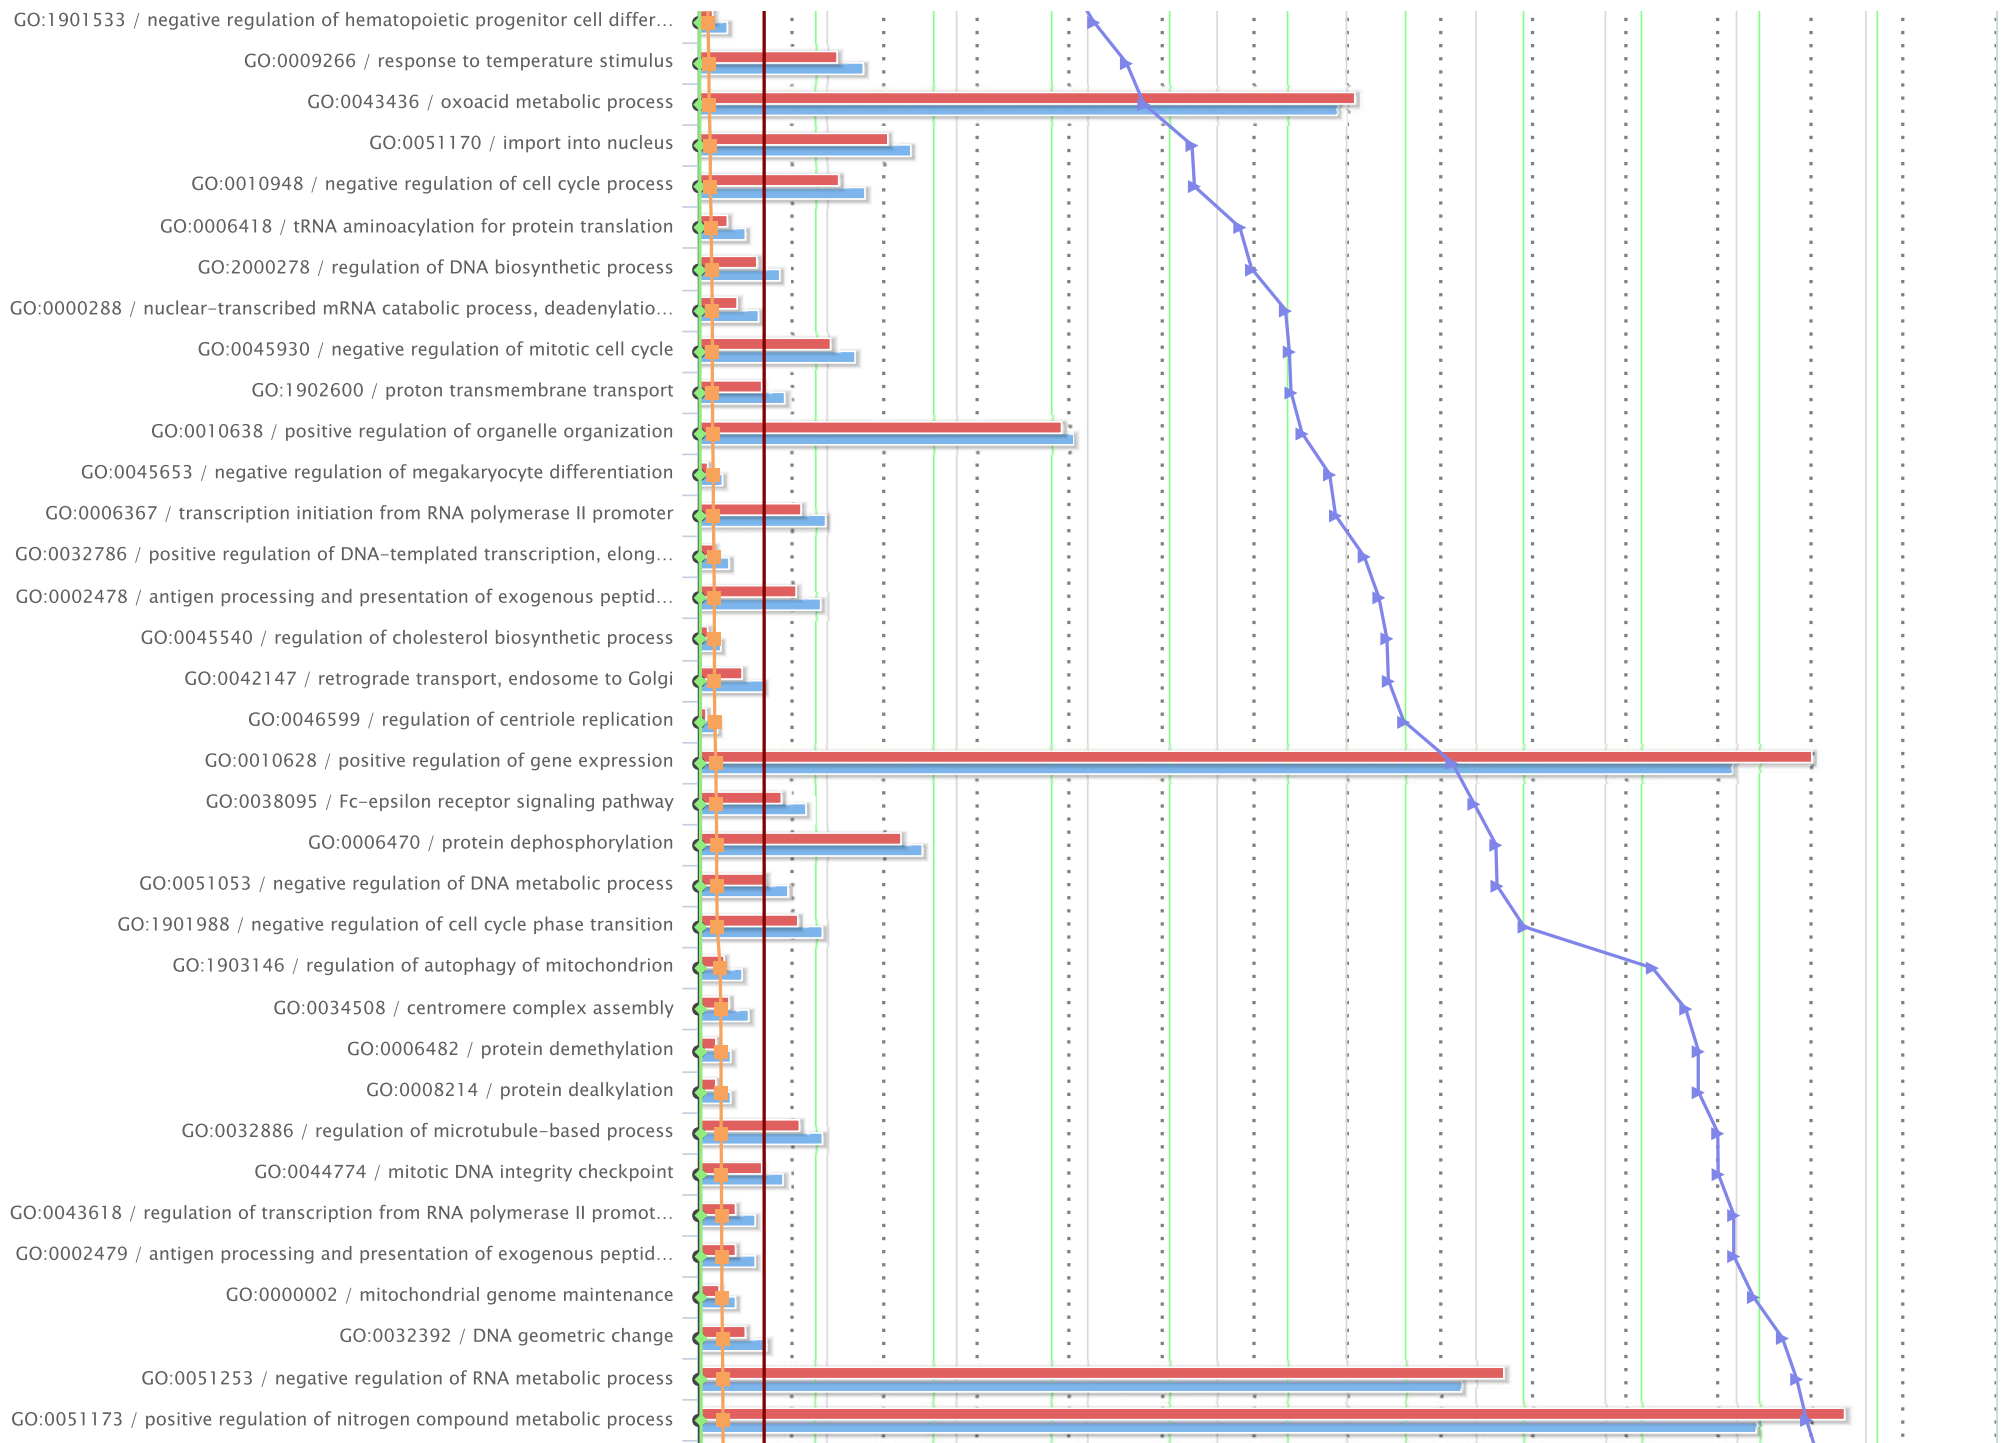

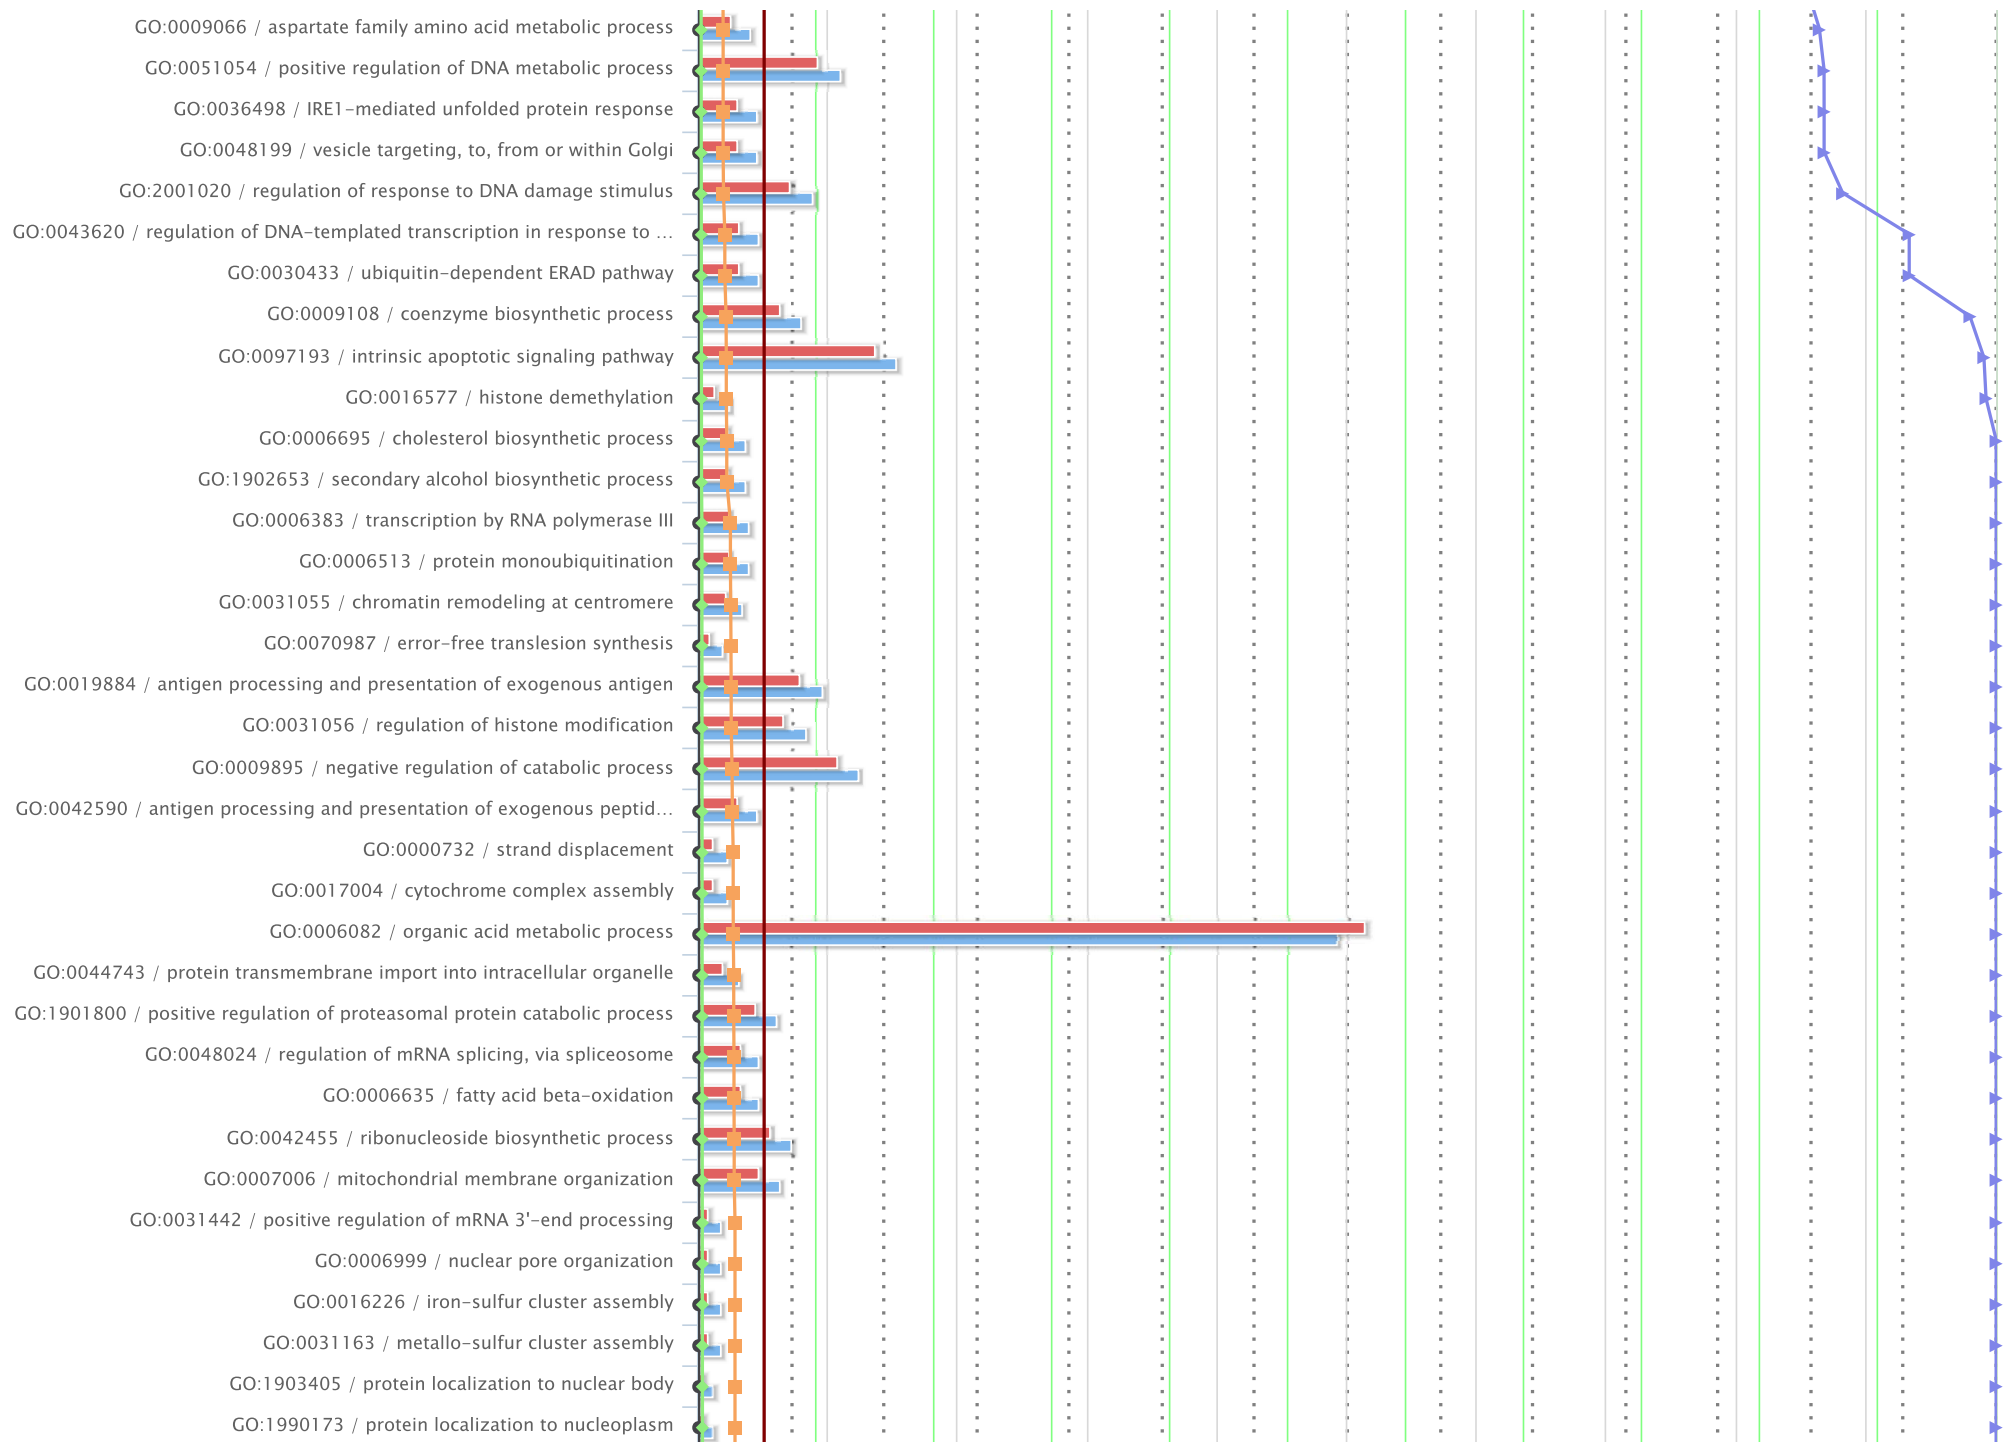

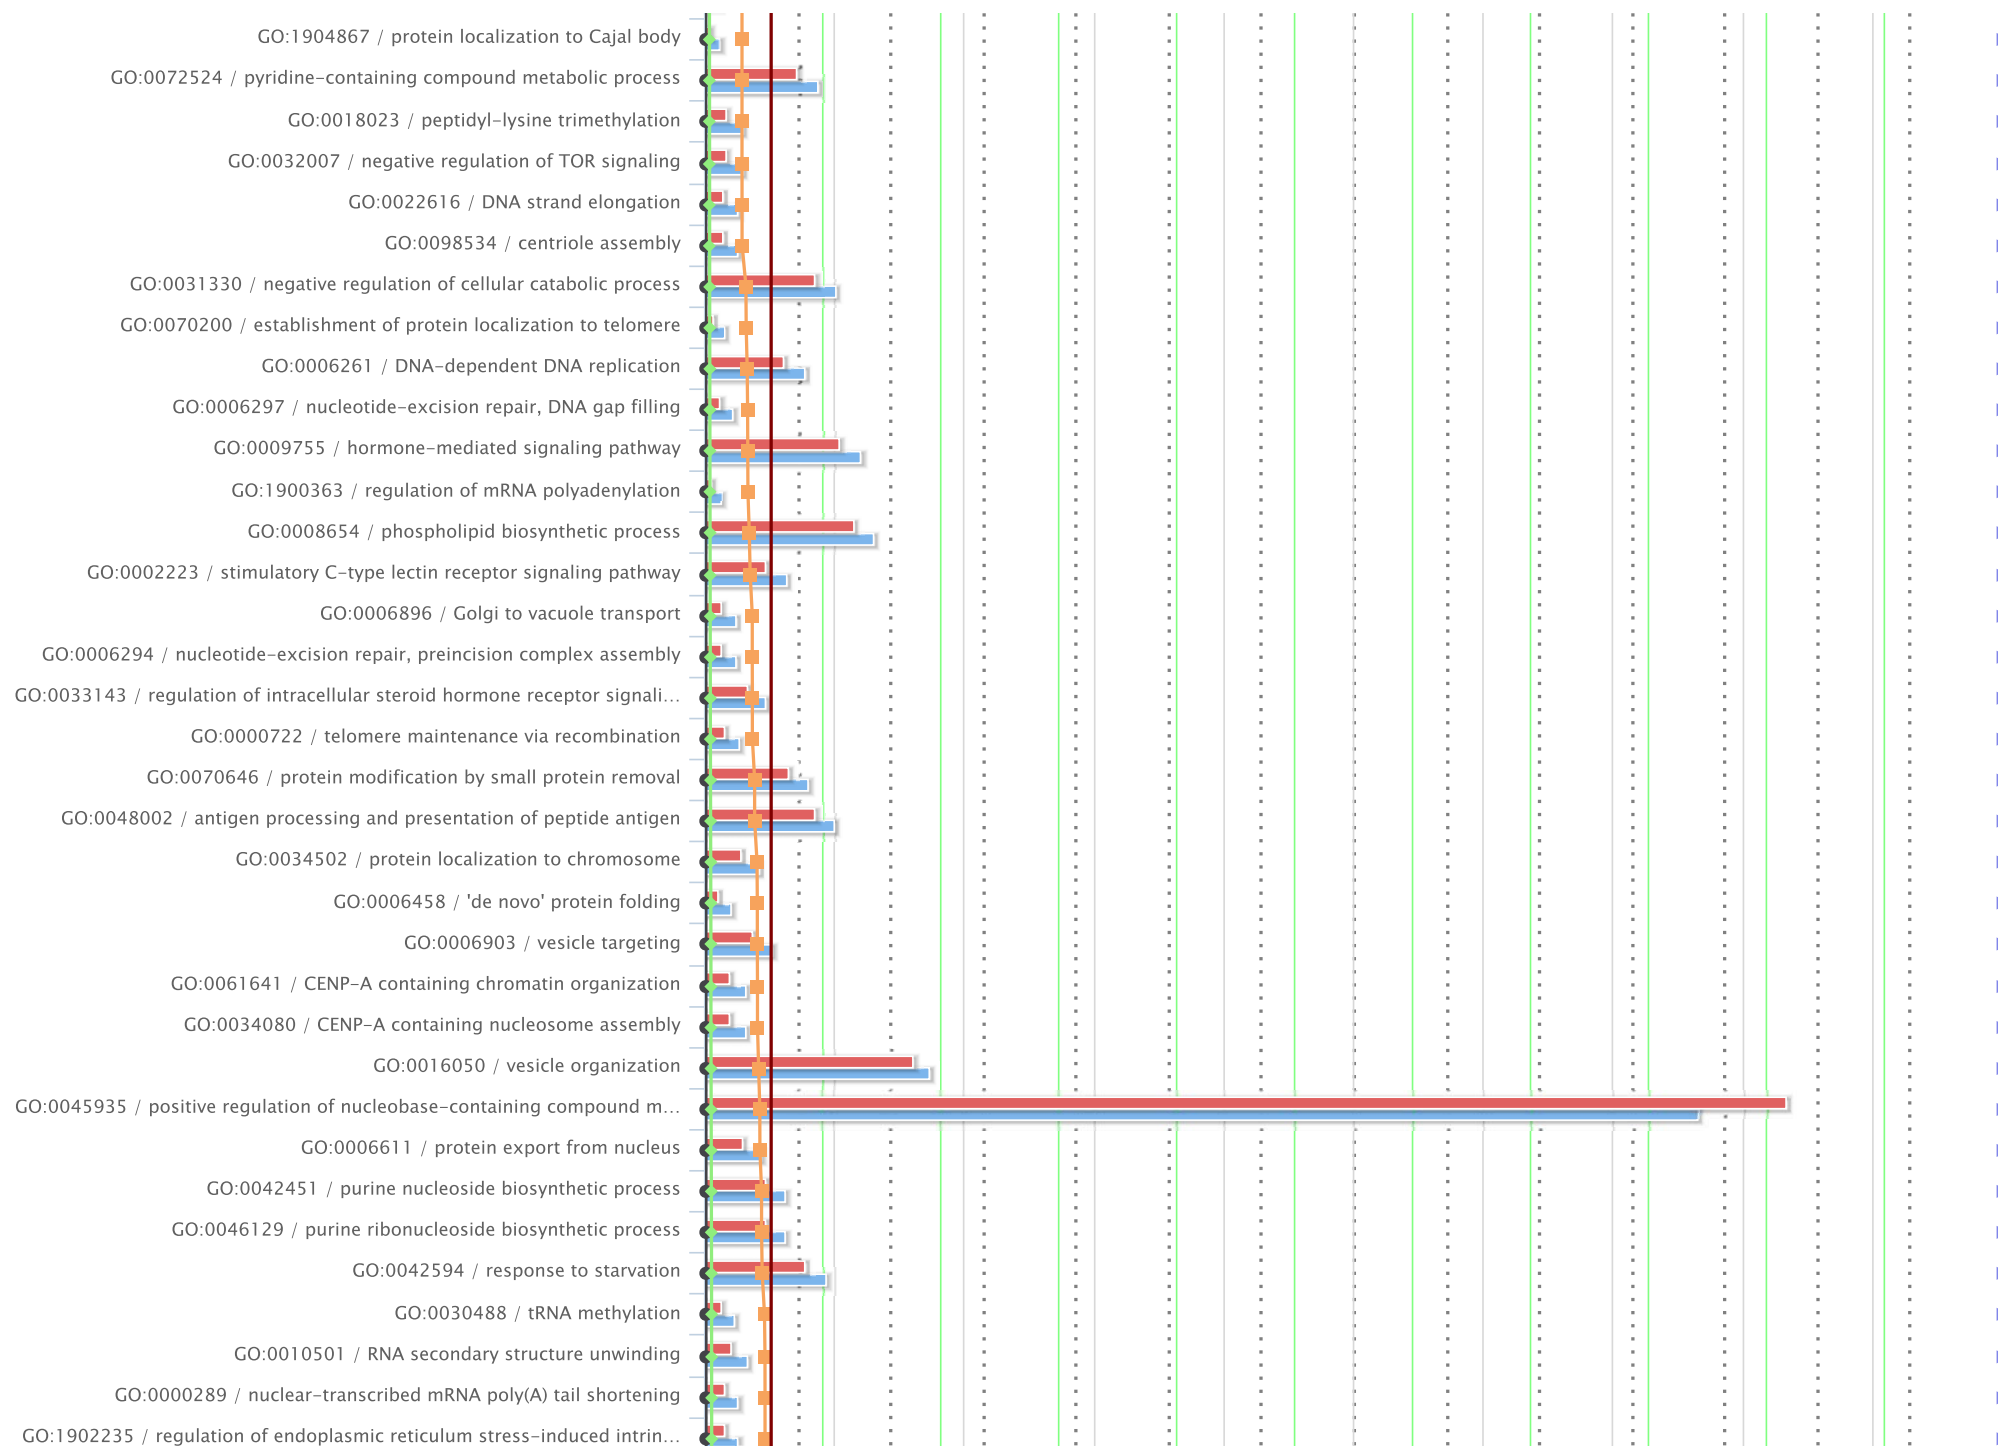

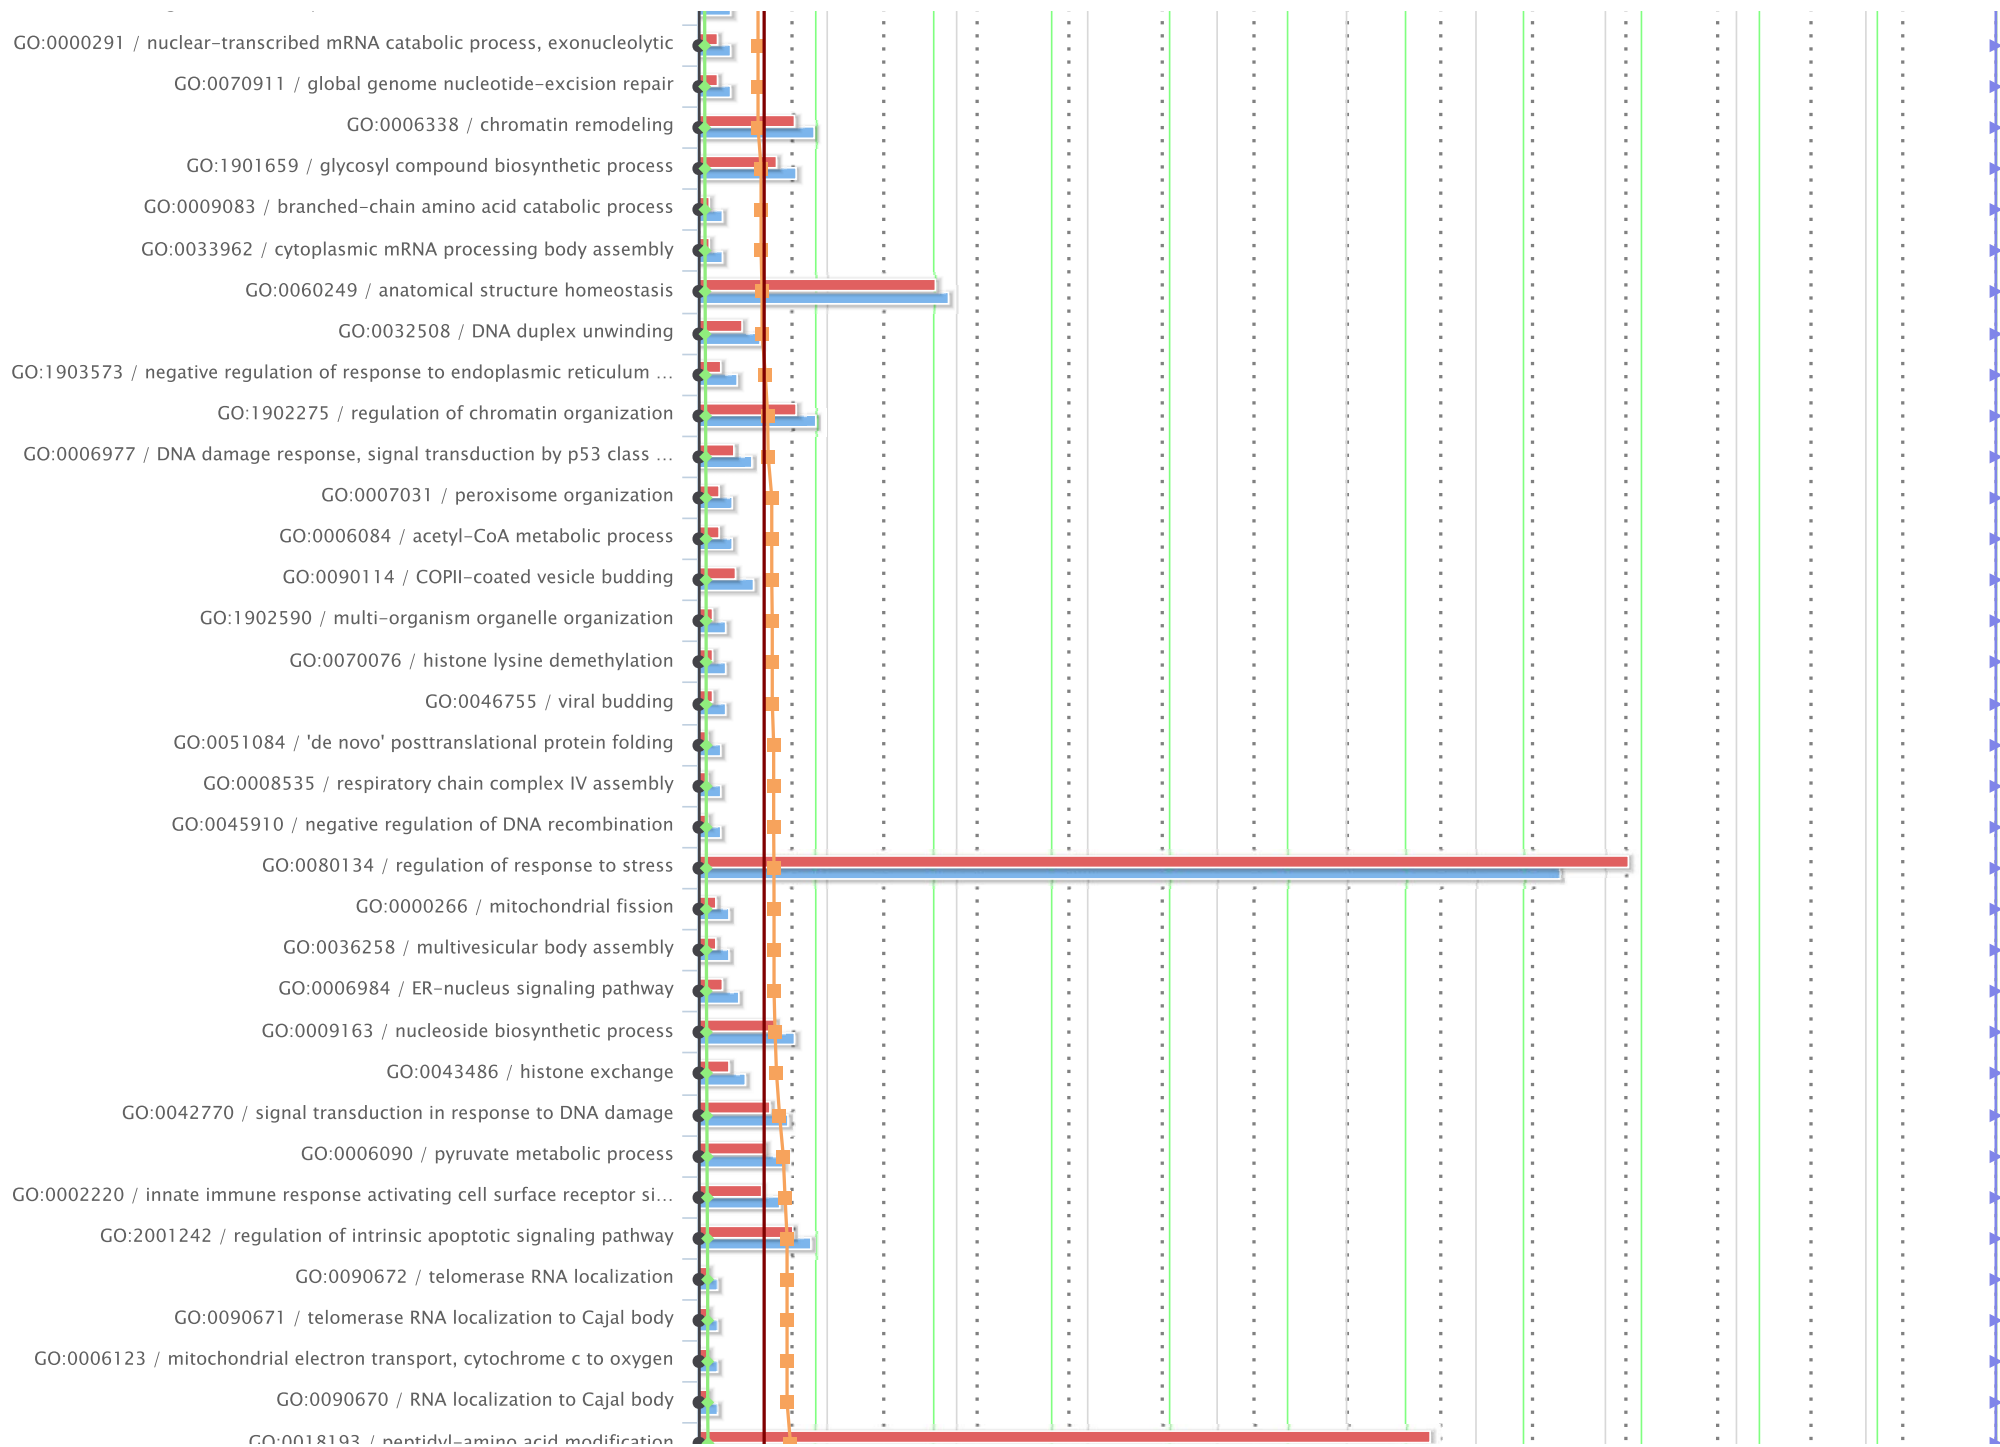

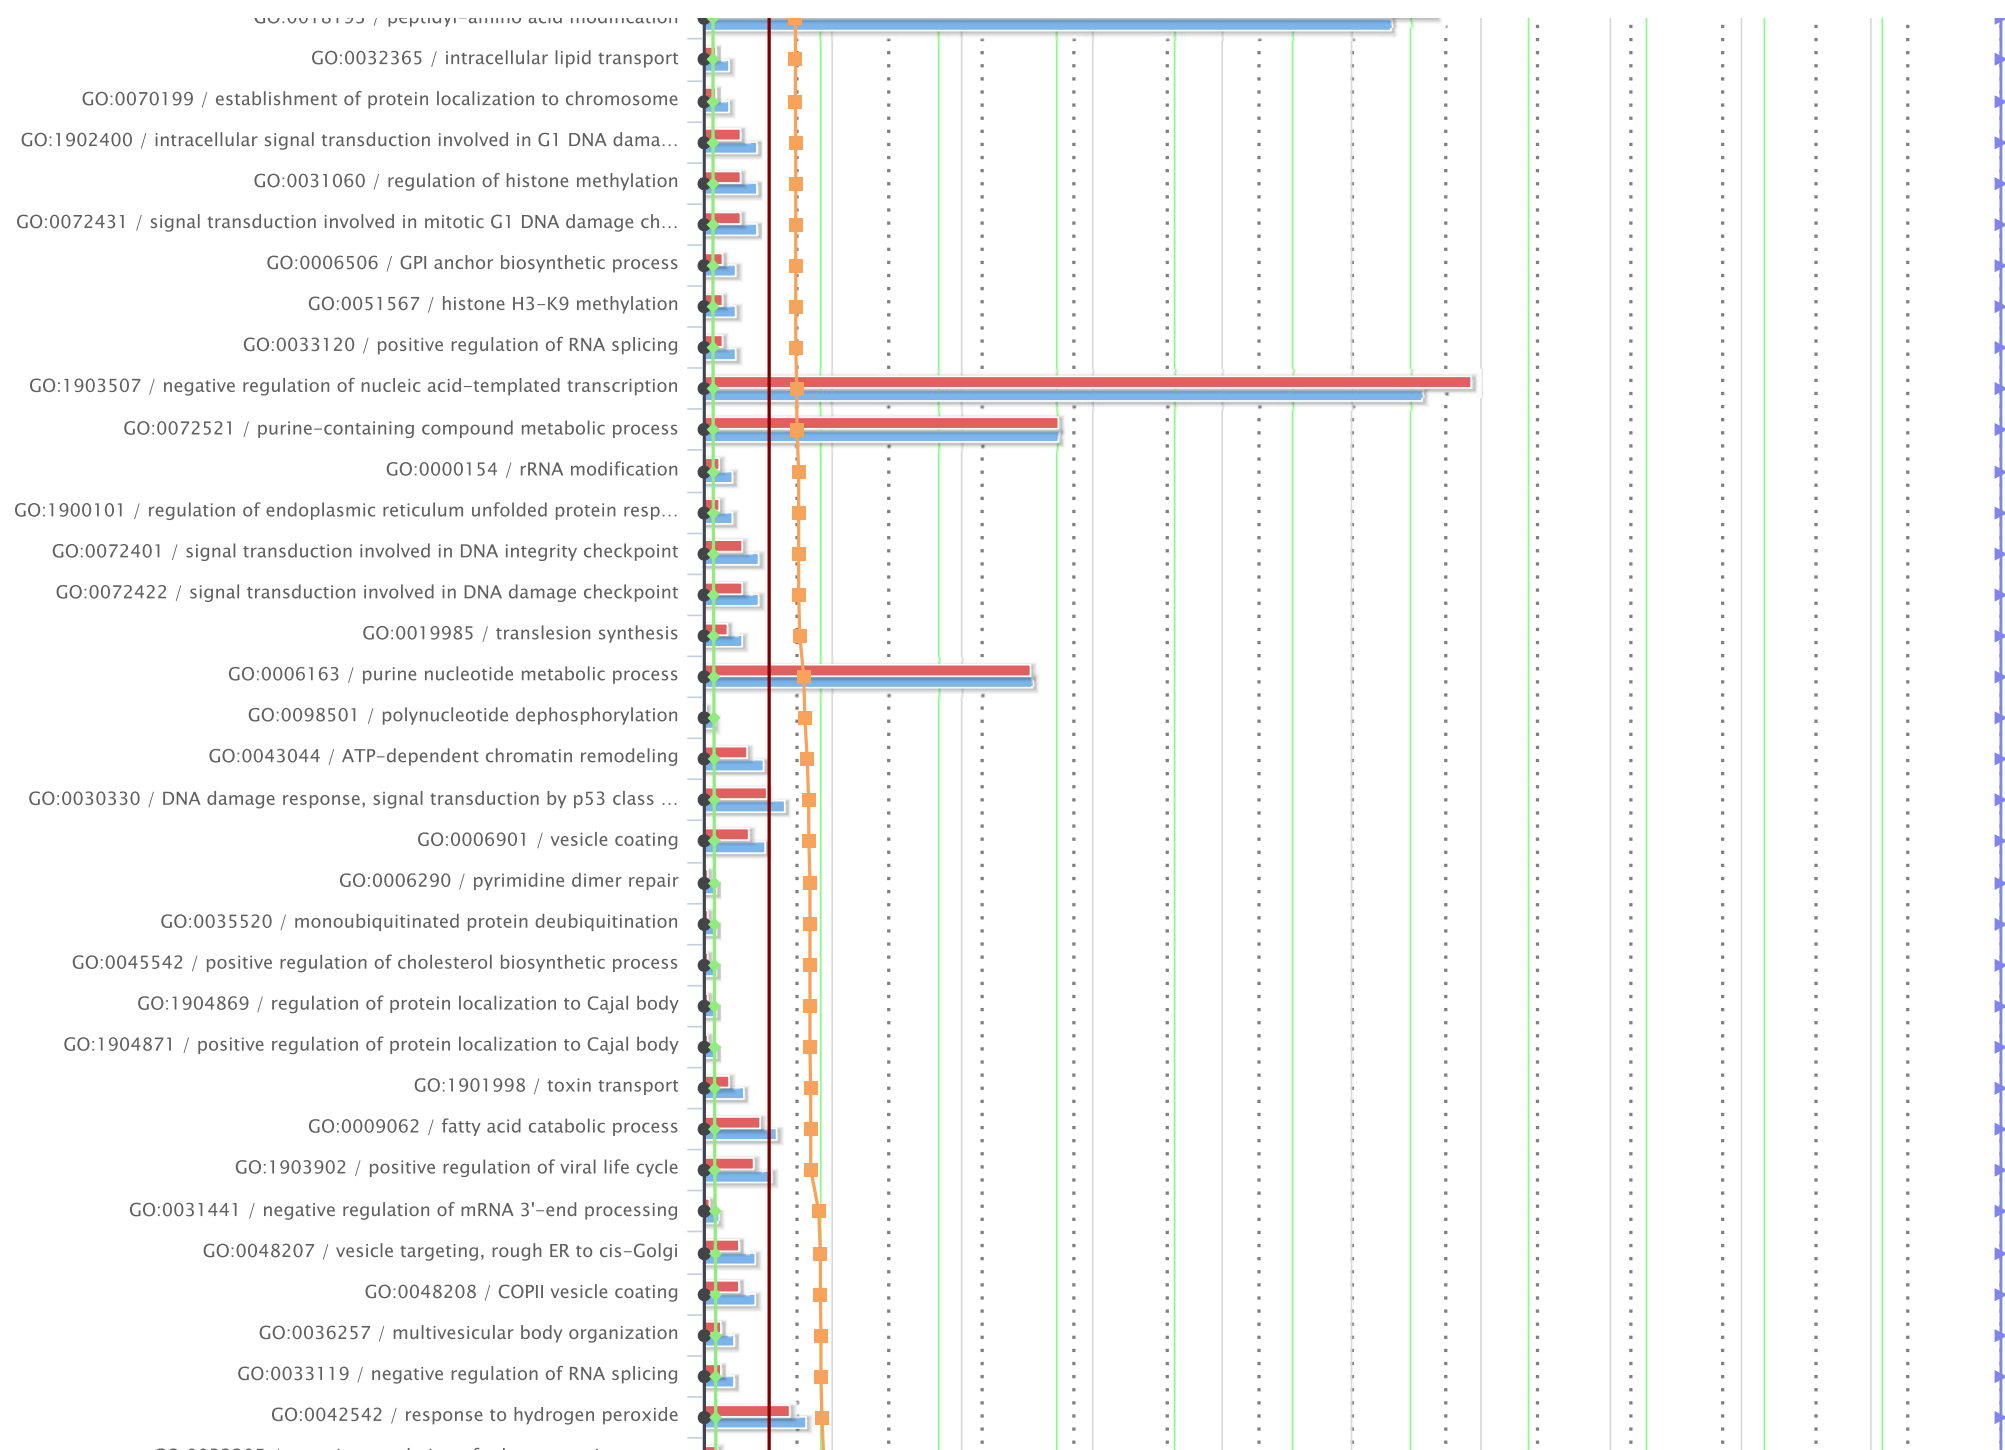

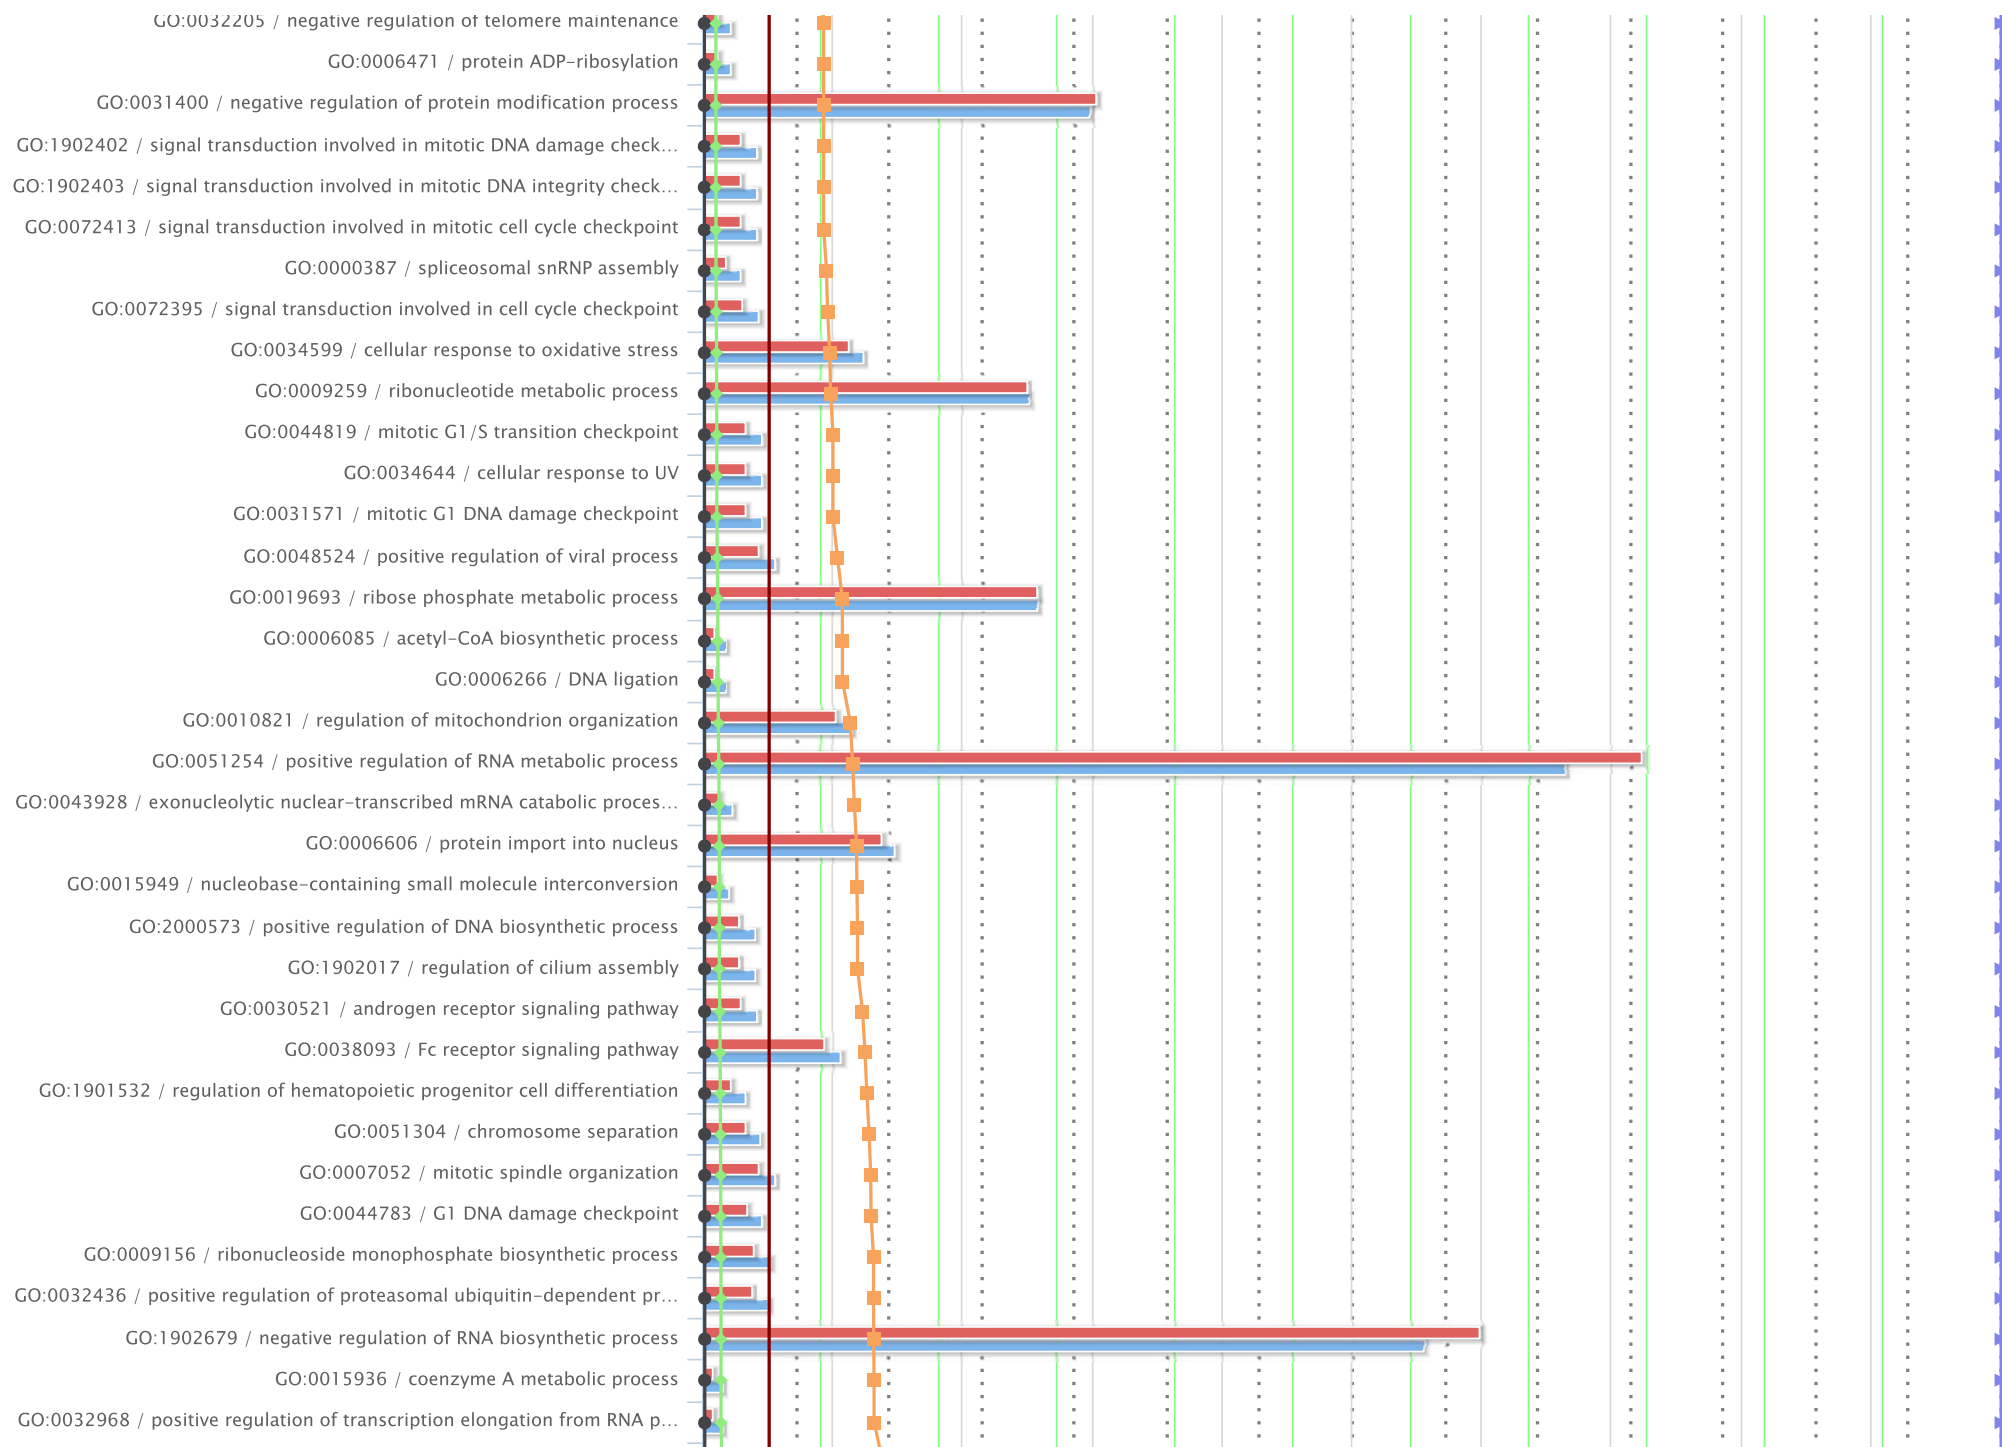

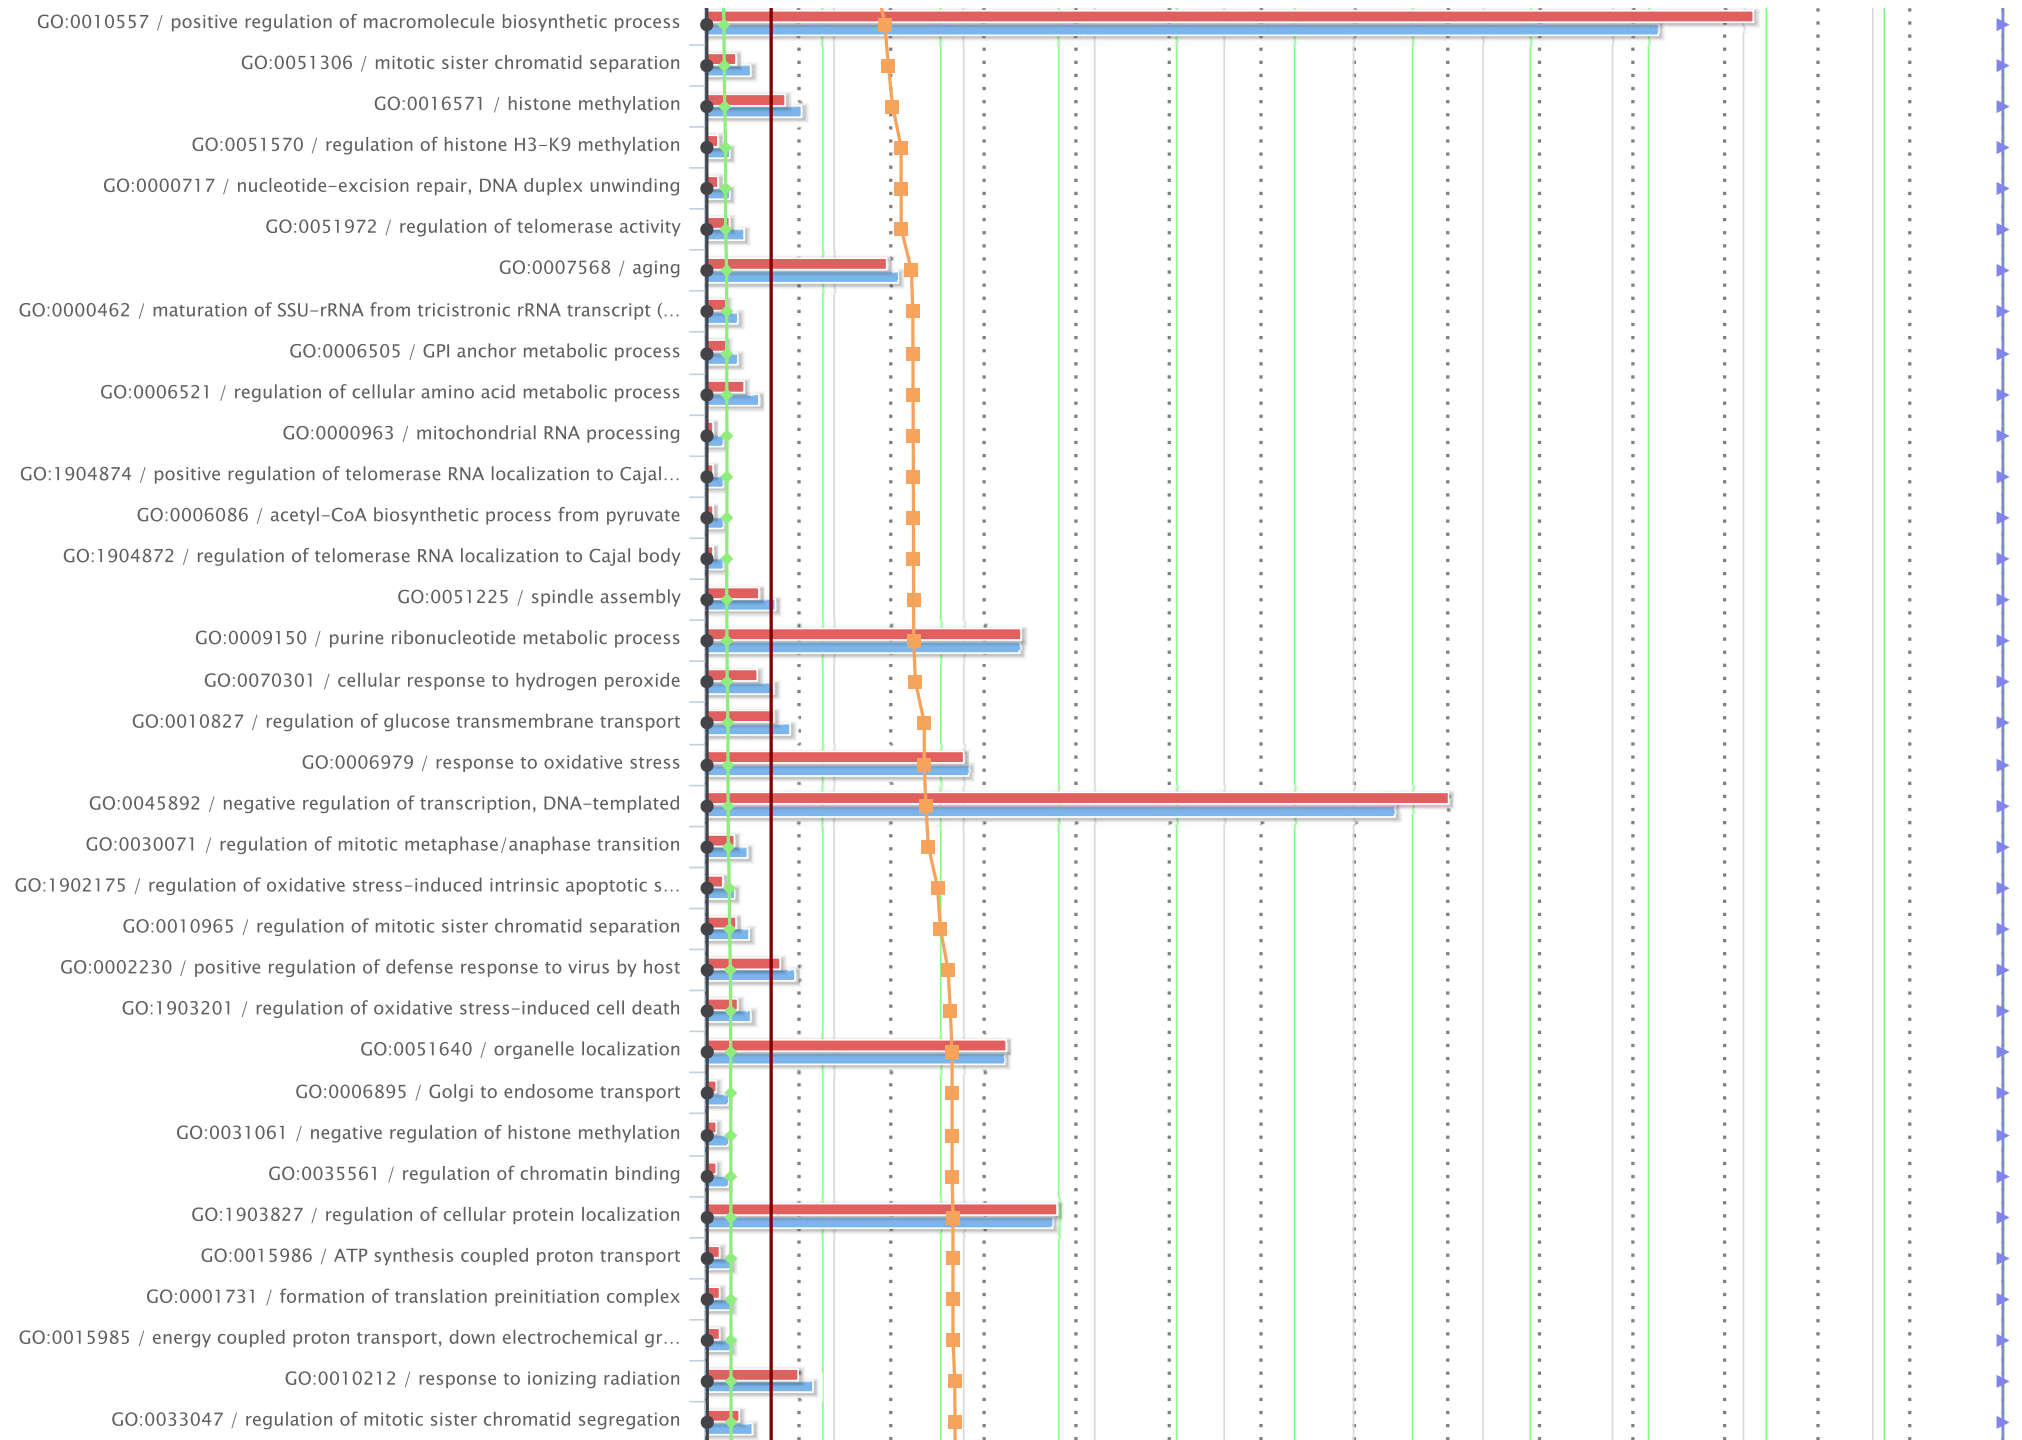

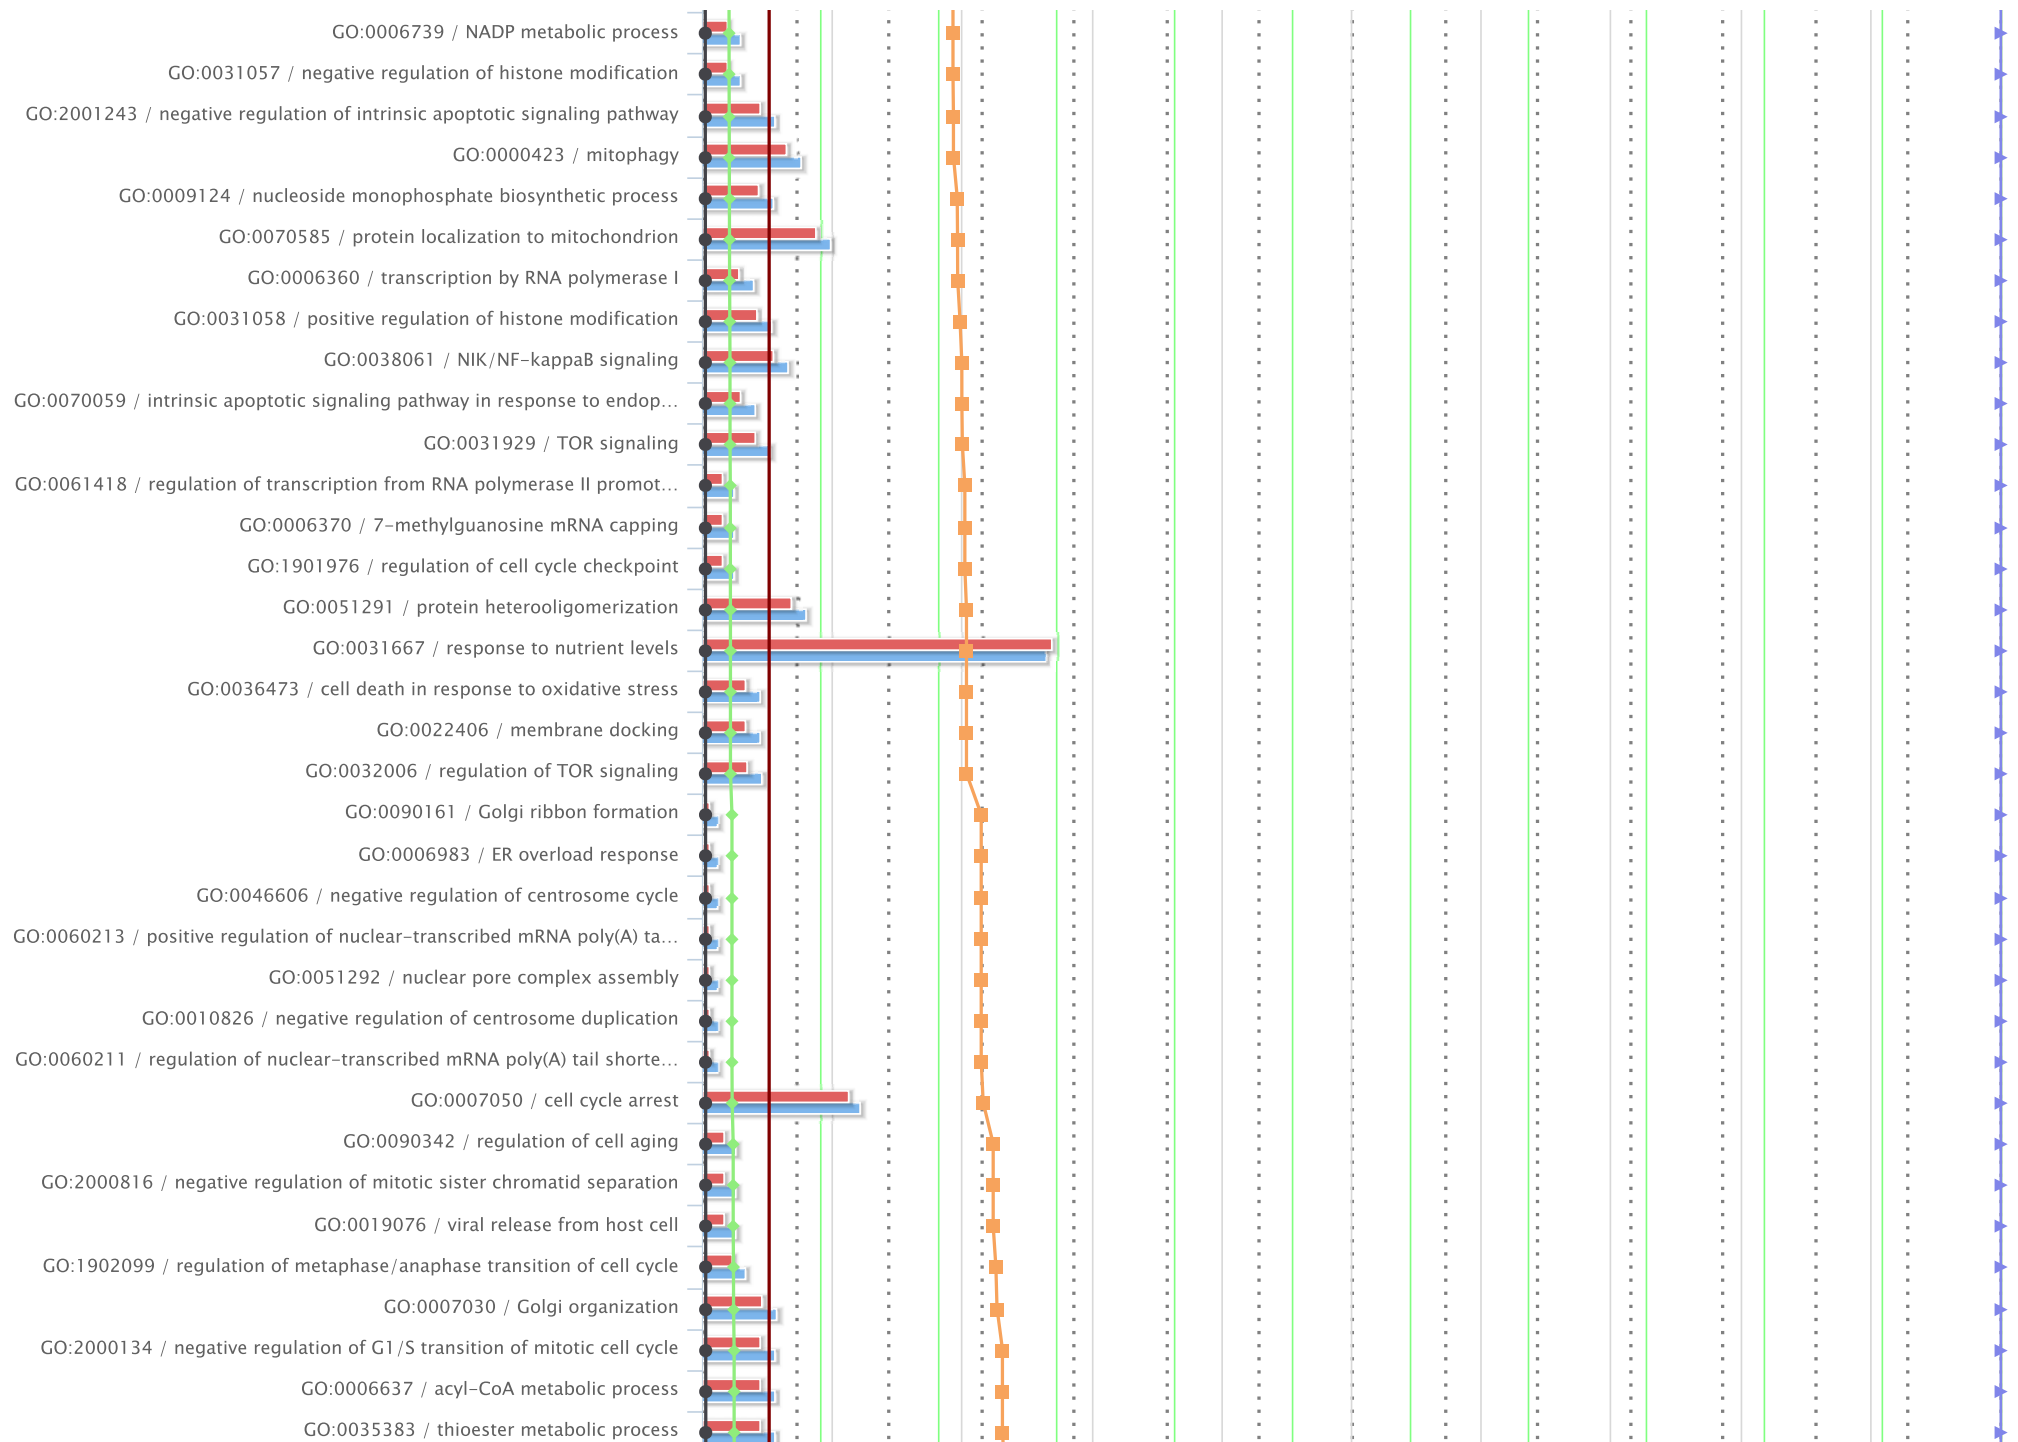

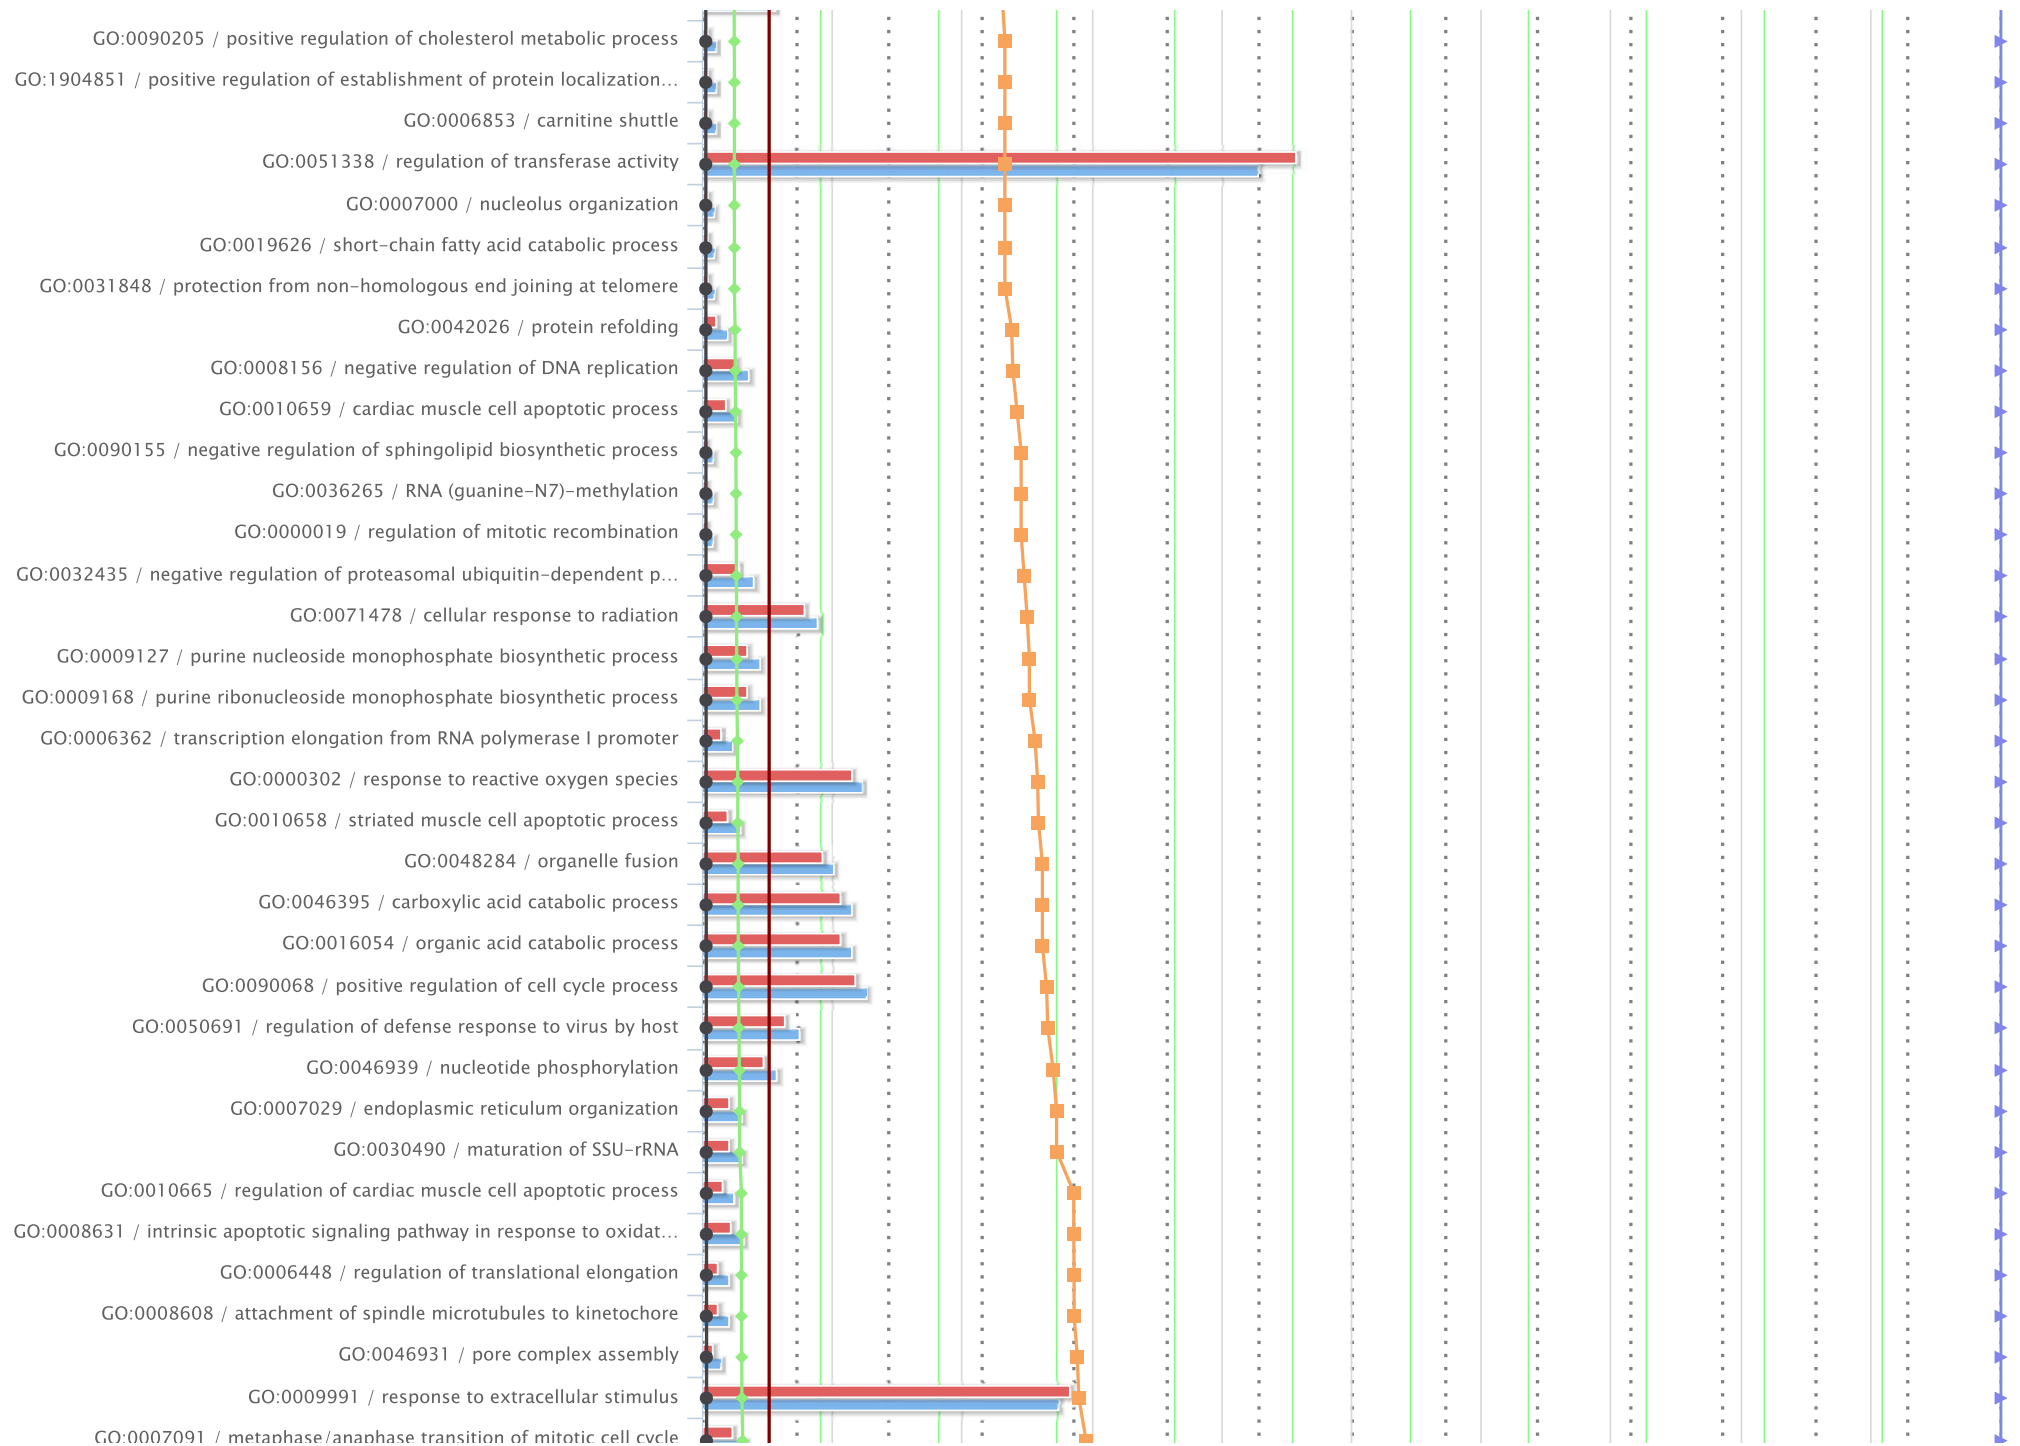

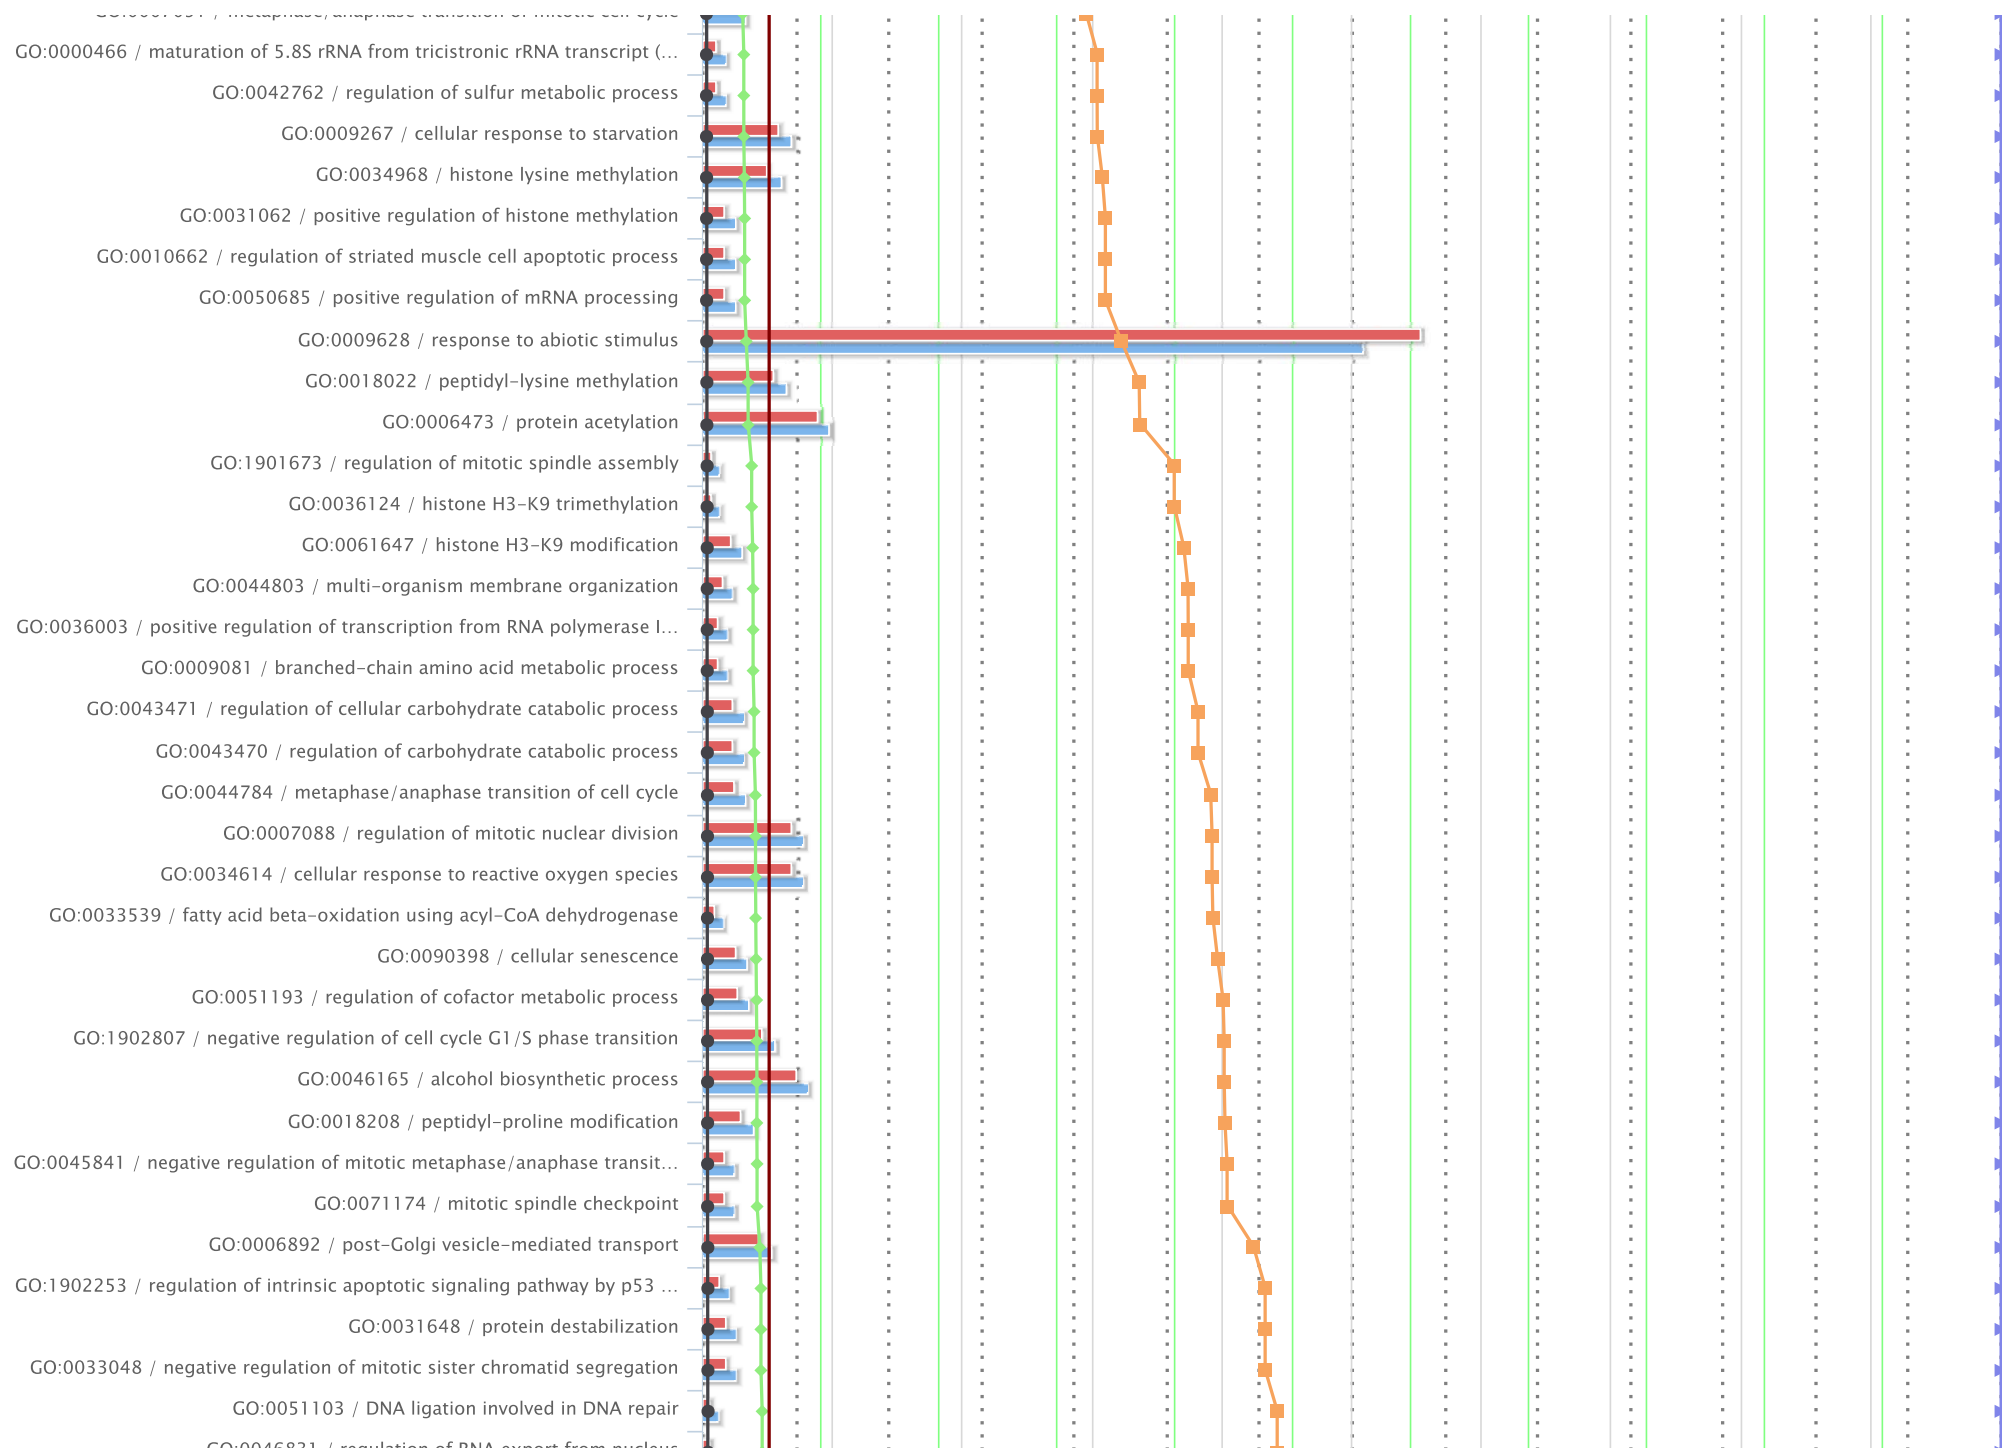

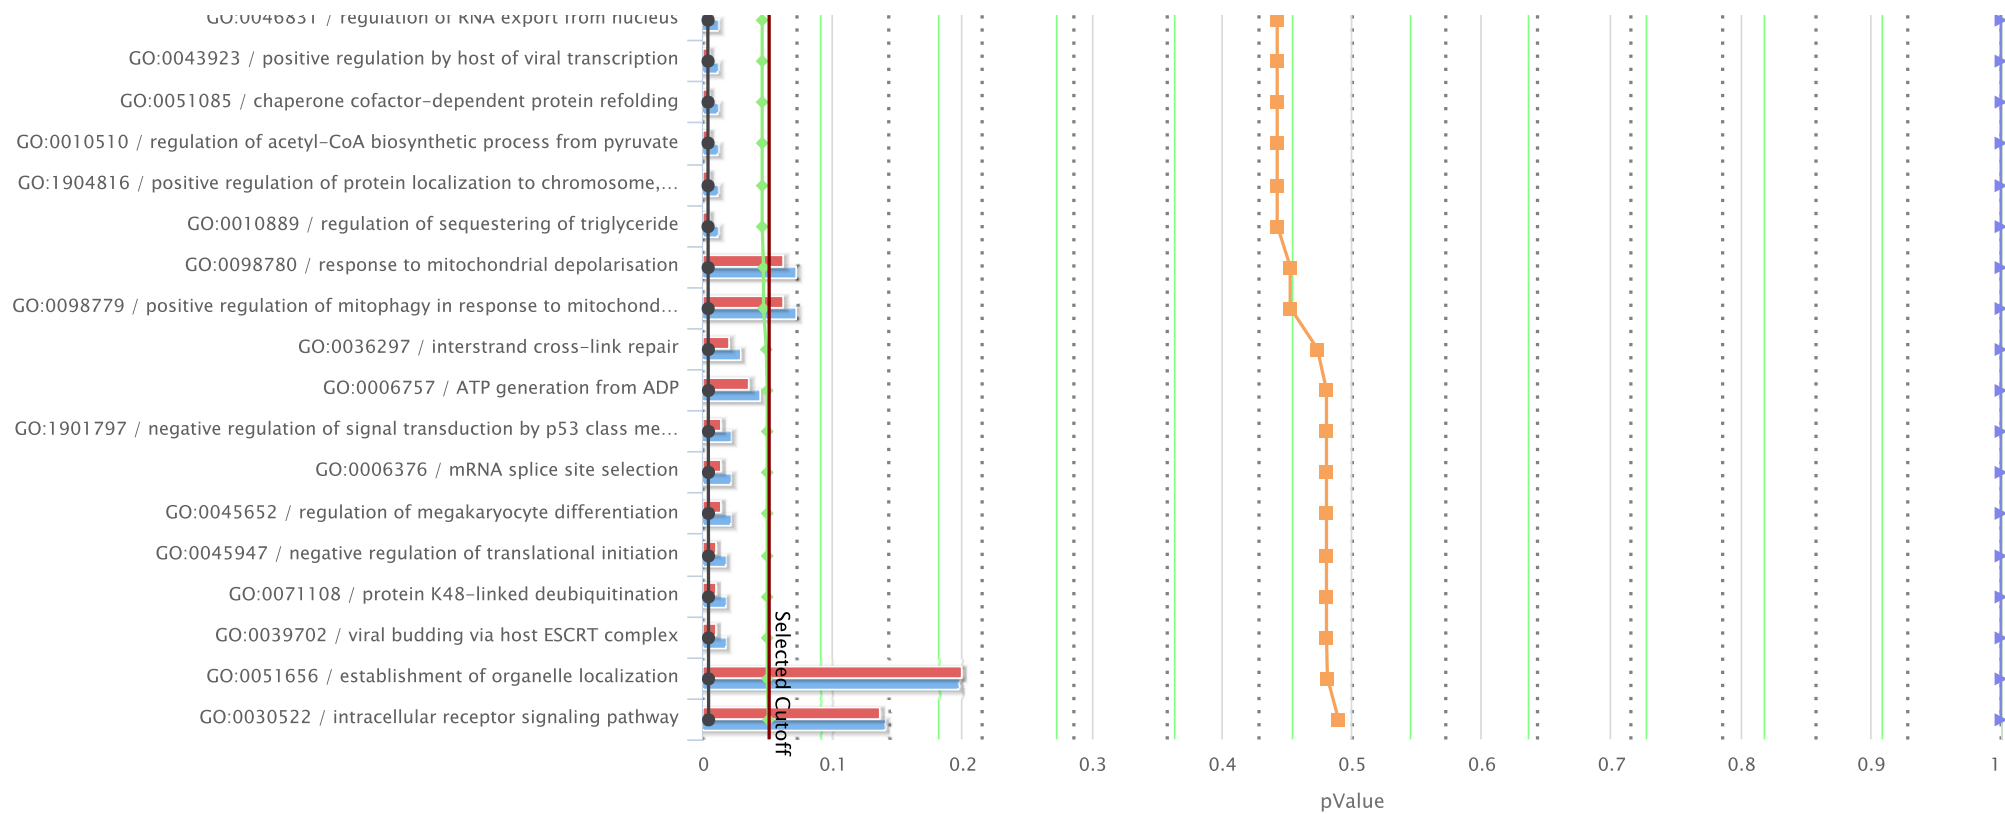

■ Genes in Common 
 ■ Genes in Annotation 
 ● pValue 
 —◆— FDR B&H 
 —■— FDR B&Y 
 —▲— Bonferroni

Supplementary Figure 5F  
Hypoacetylated genes

Significant Terms For: GO: Cellular Component

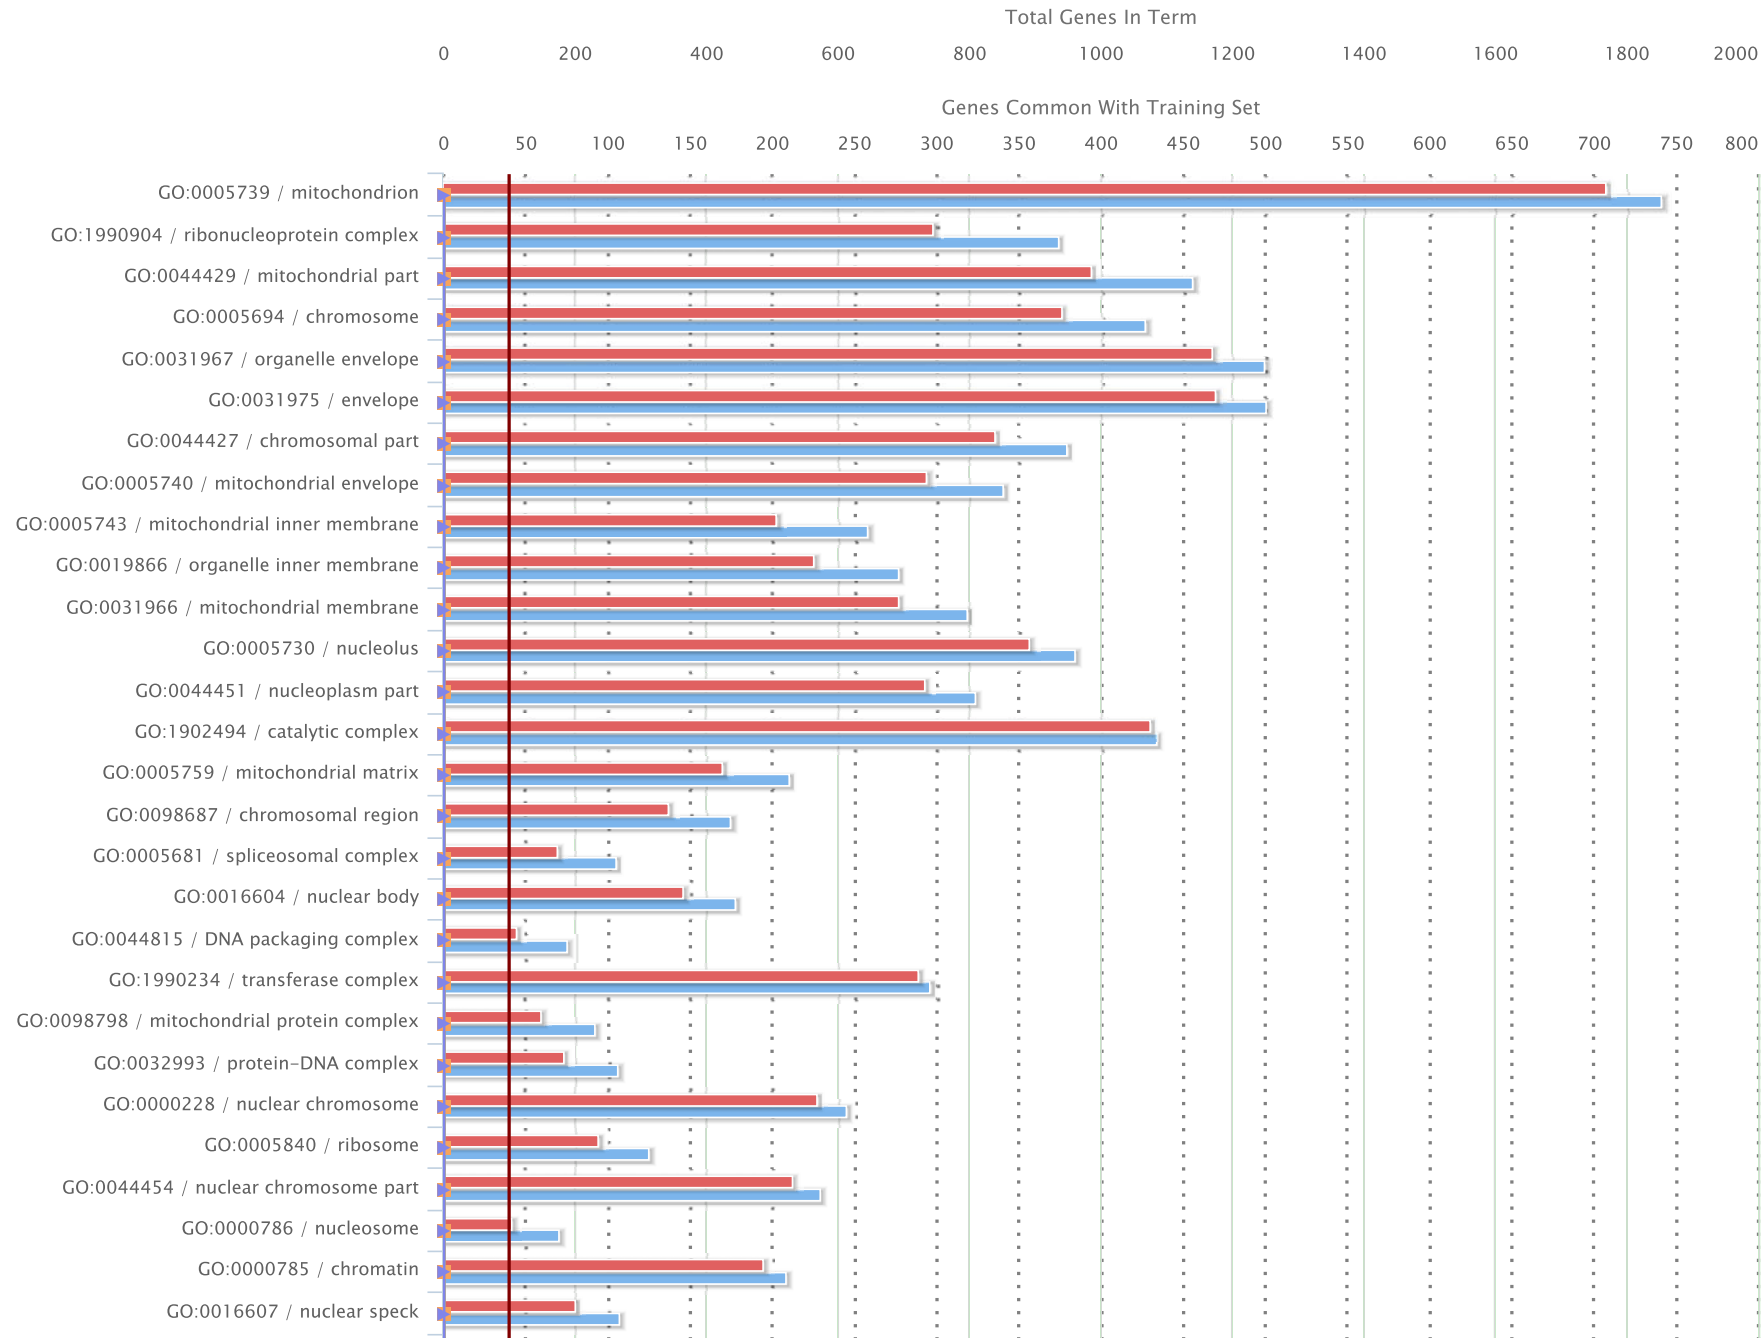

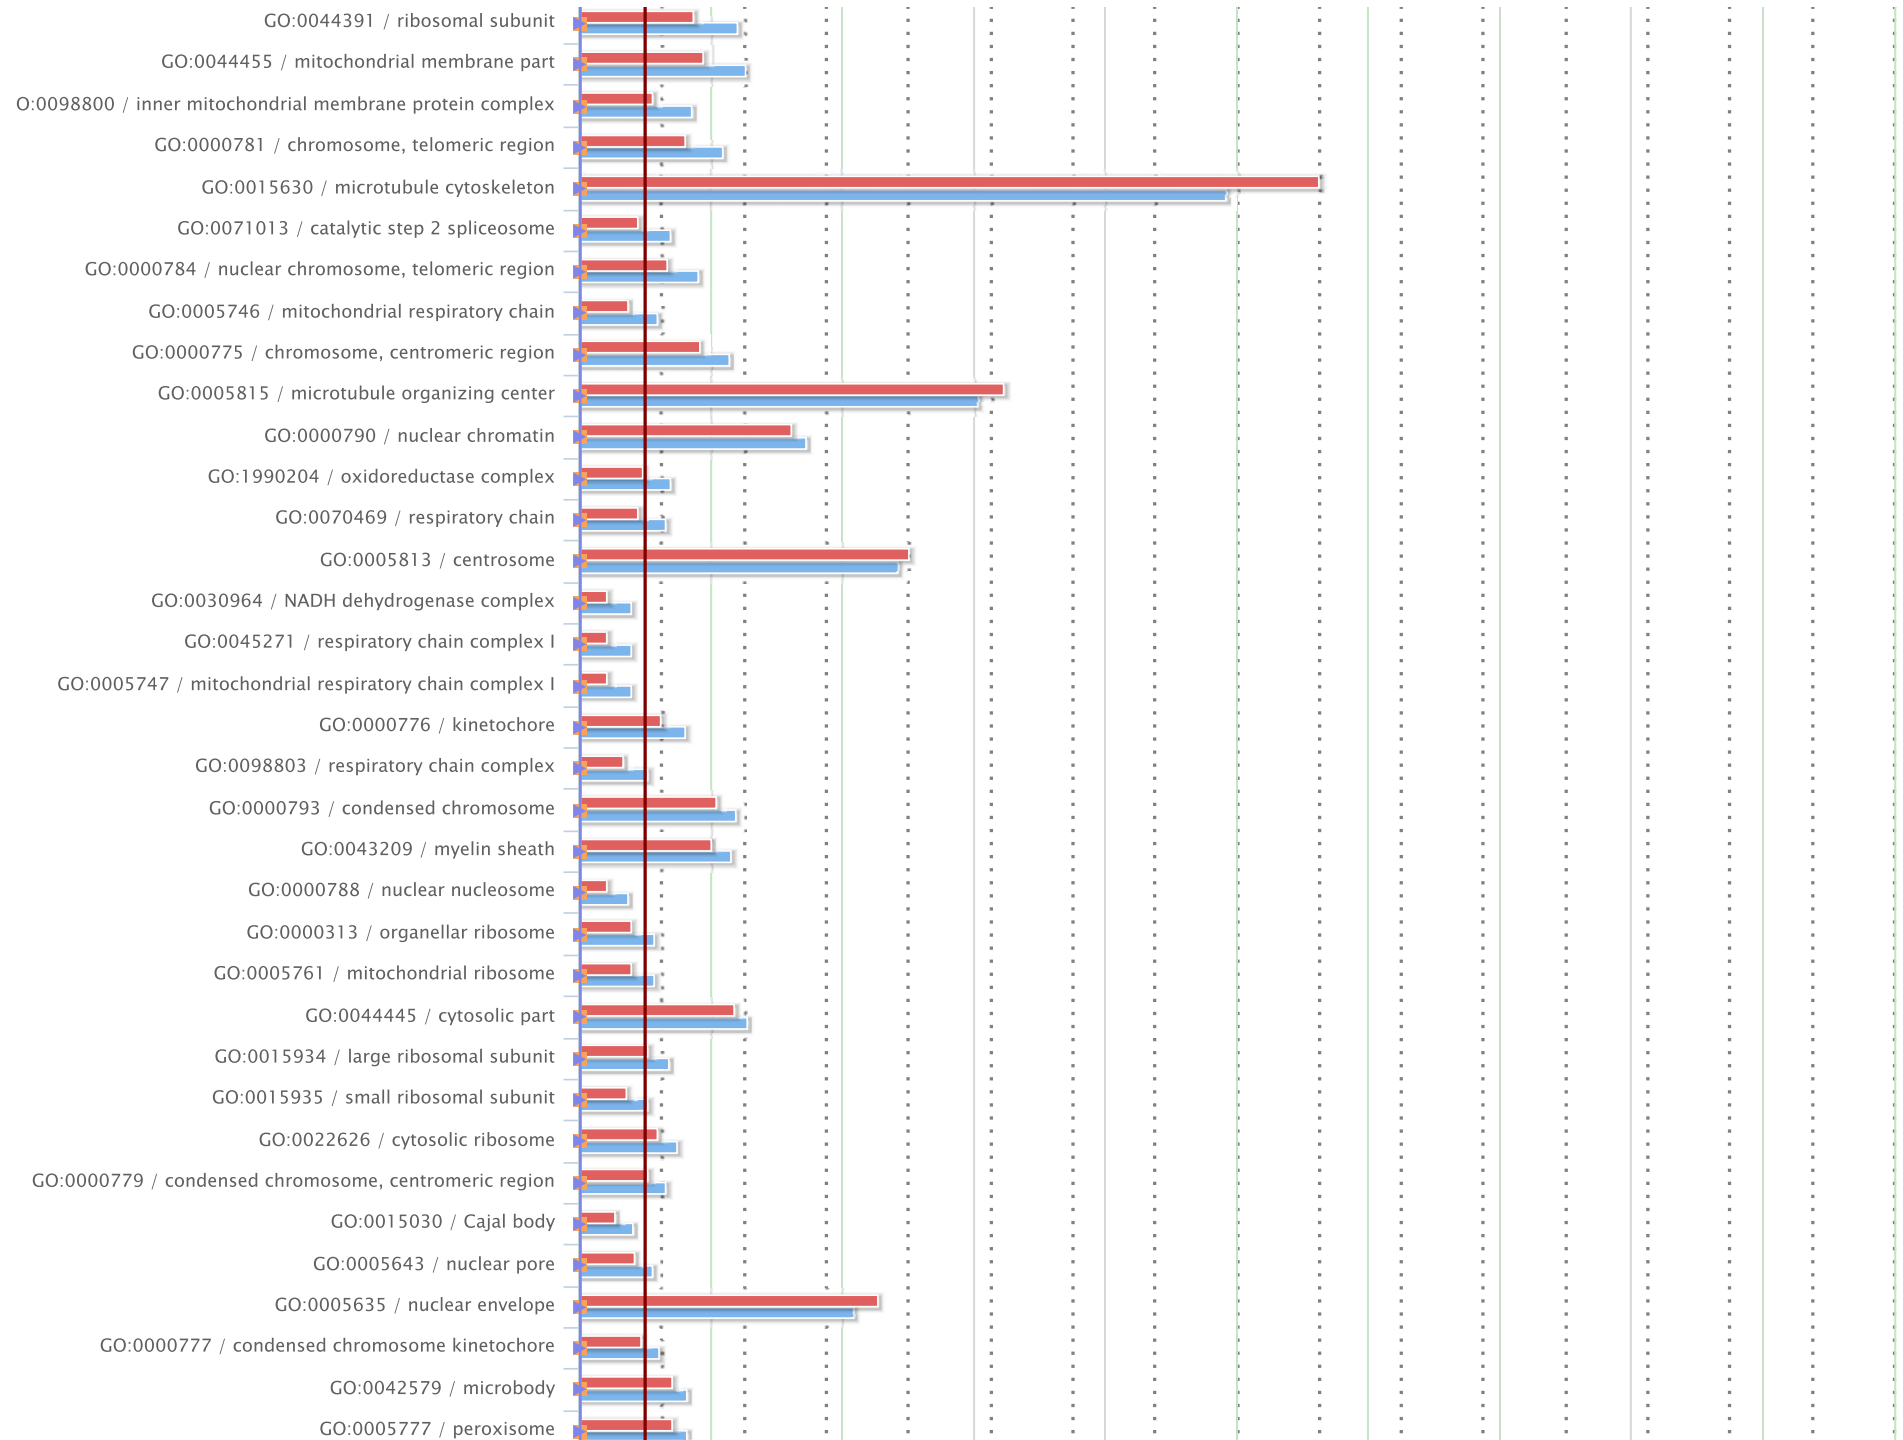

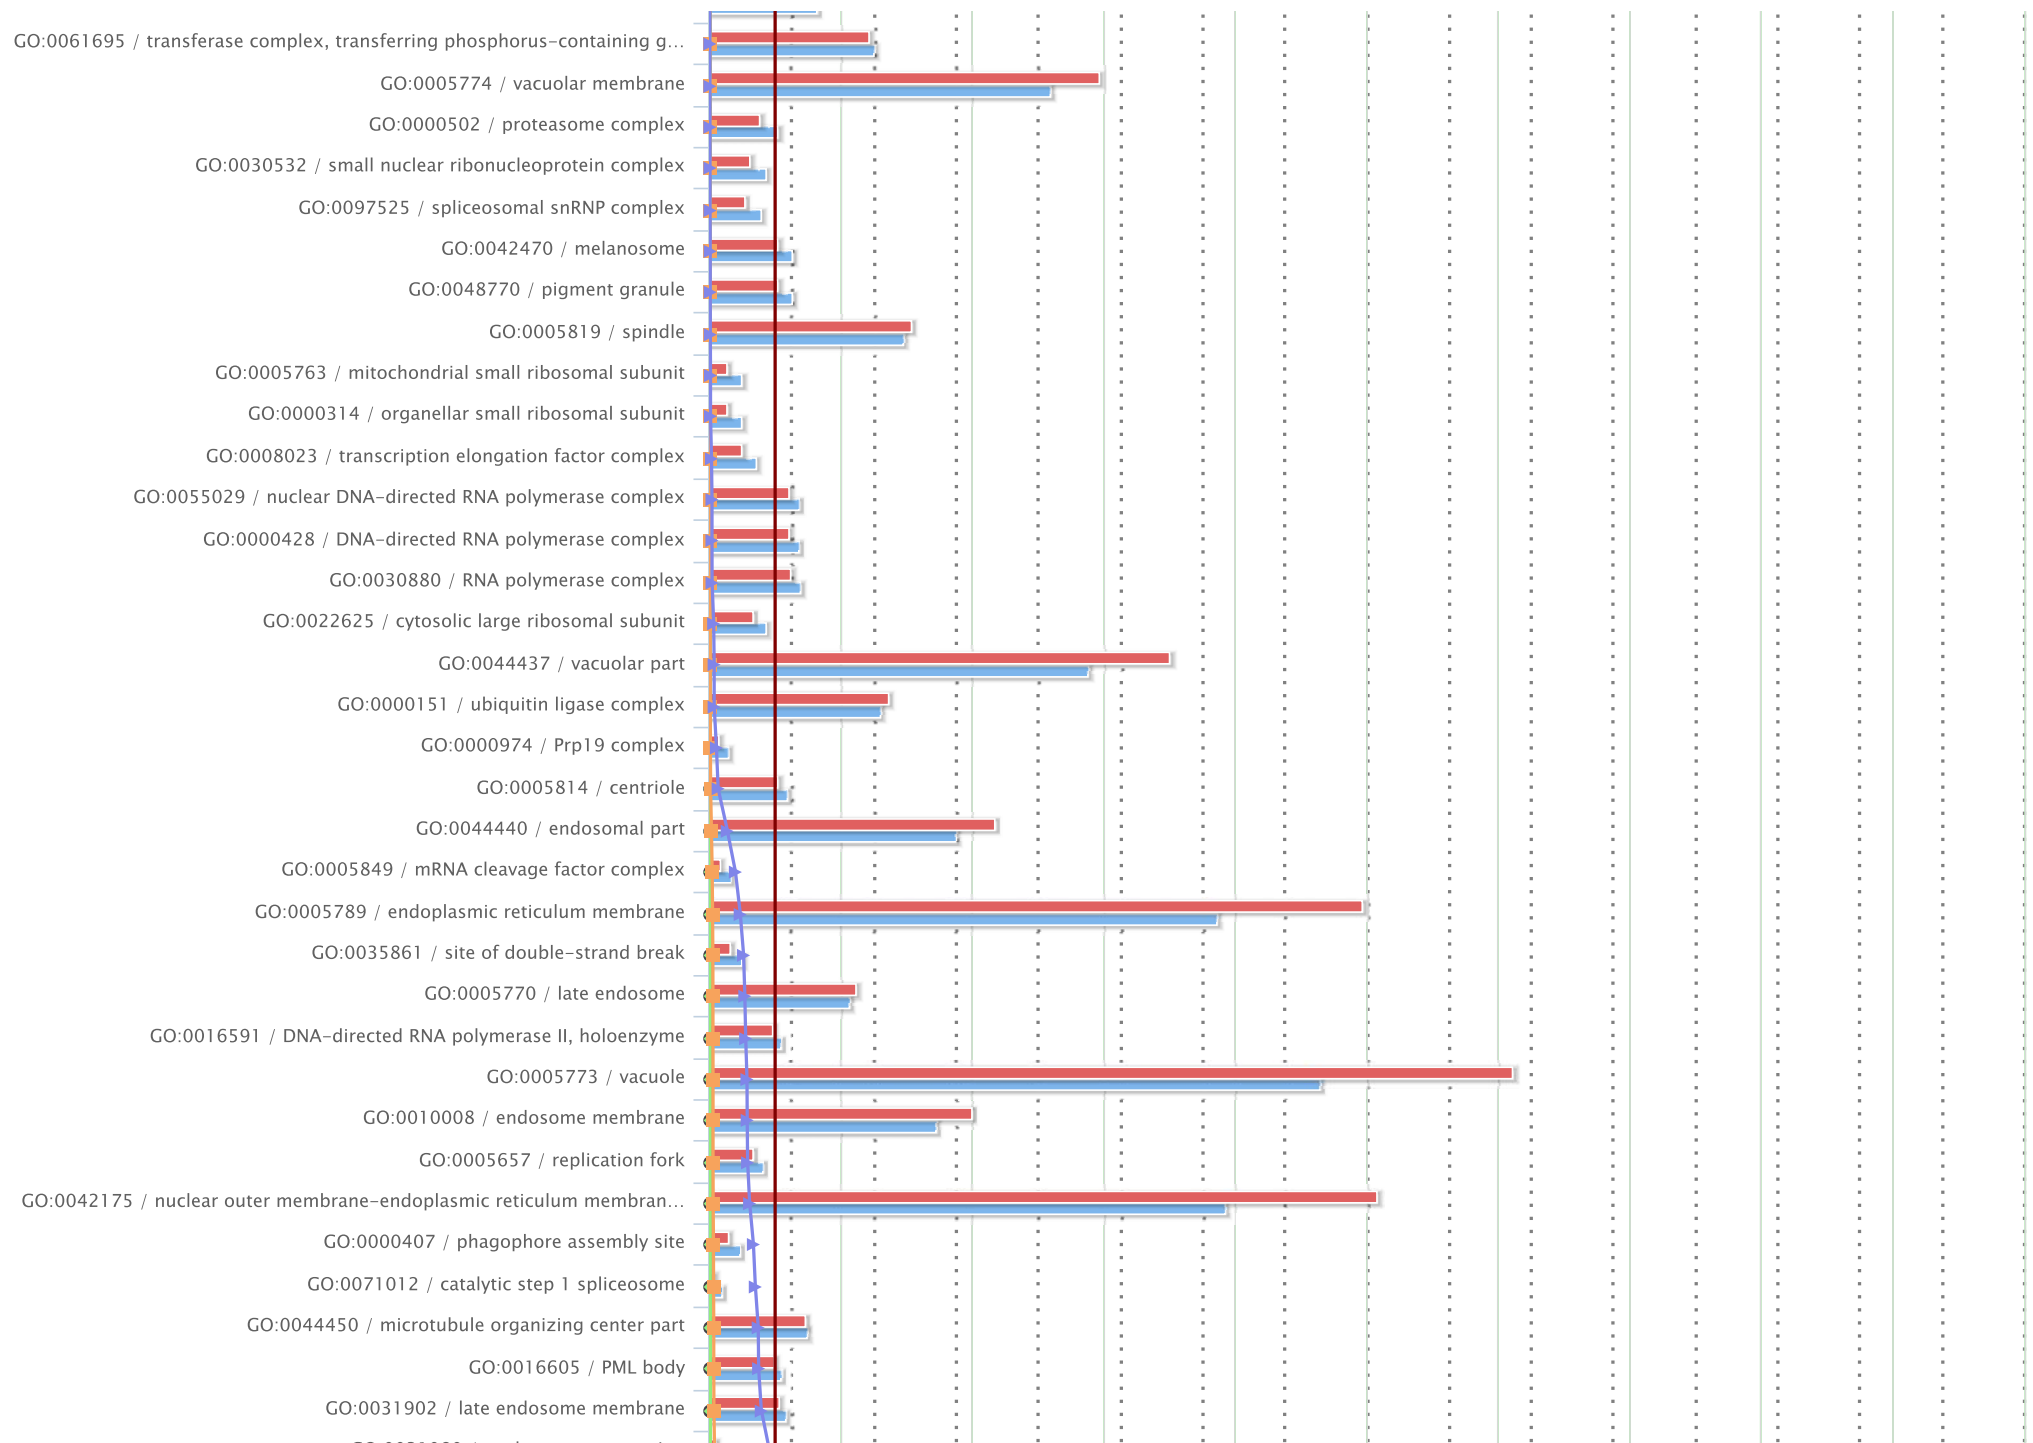

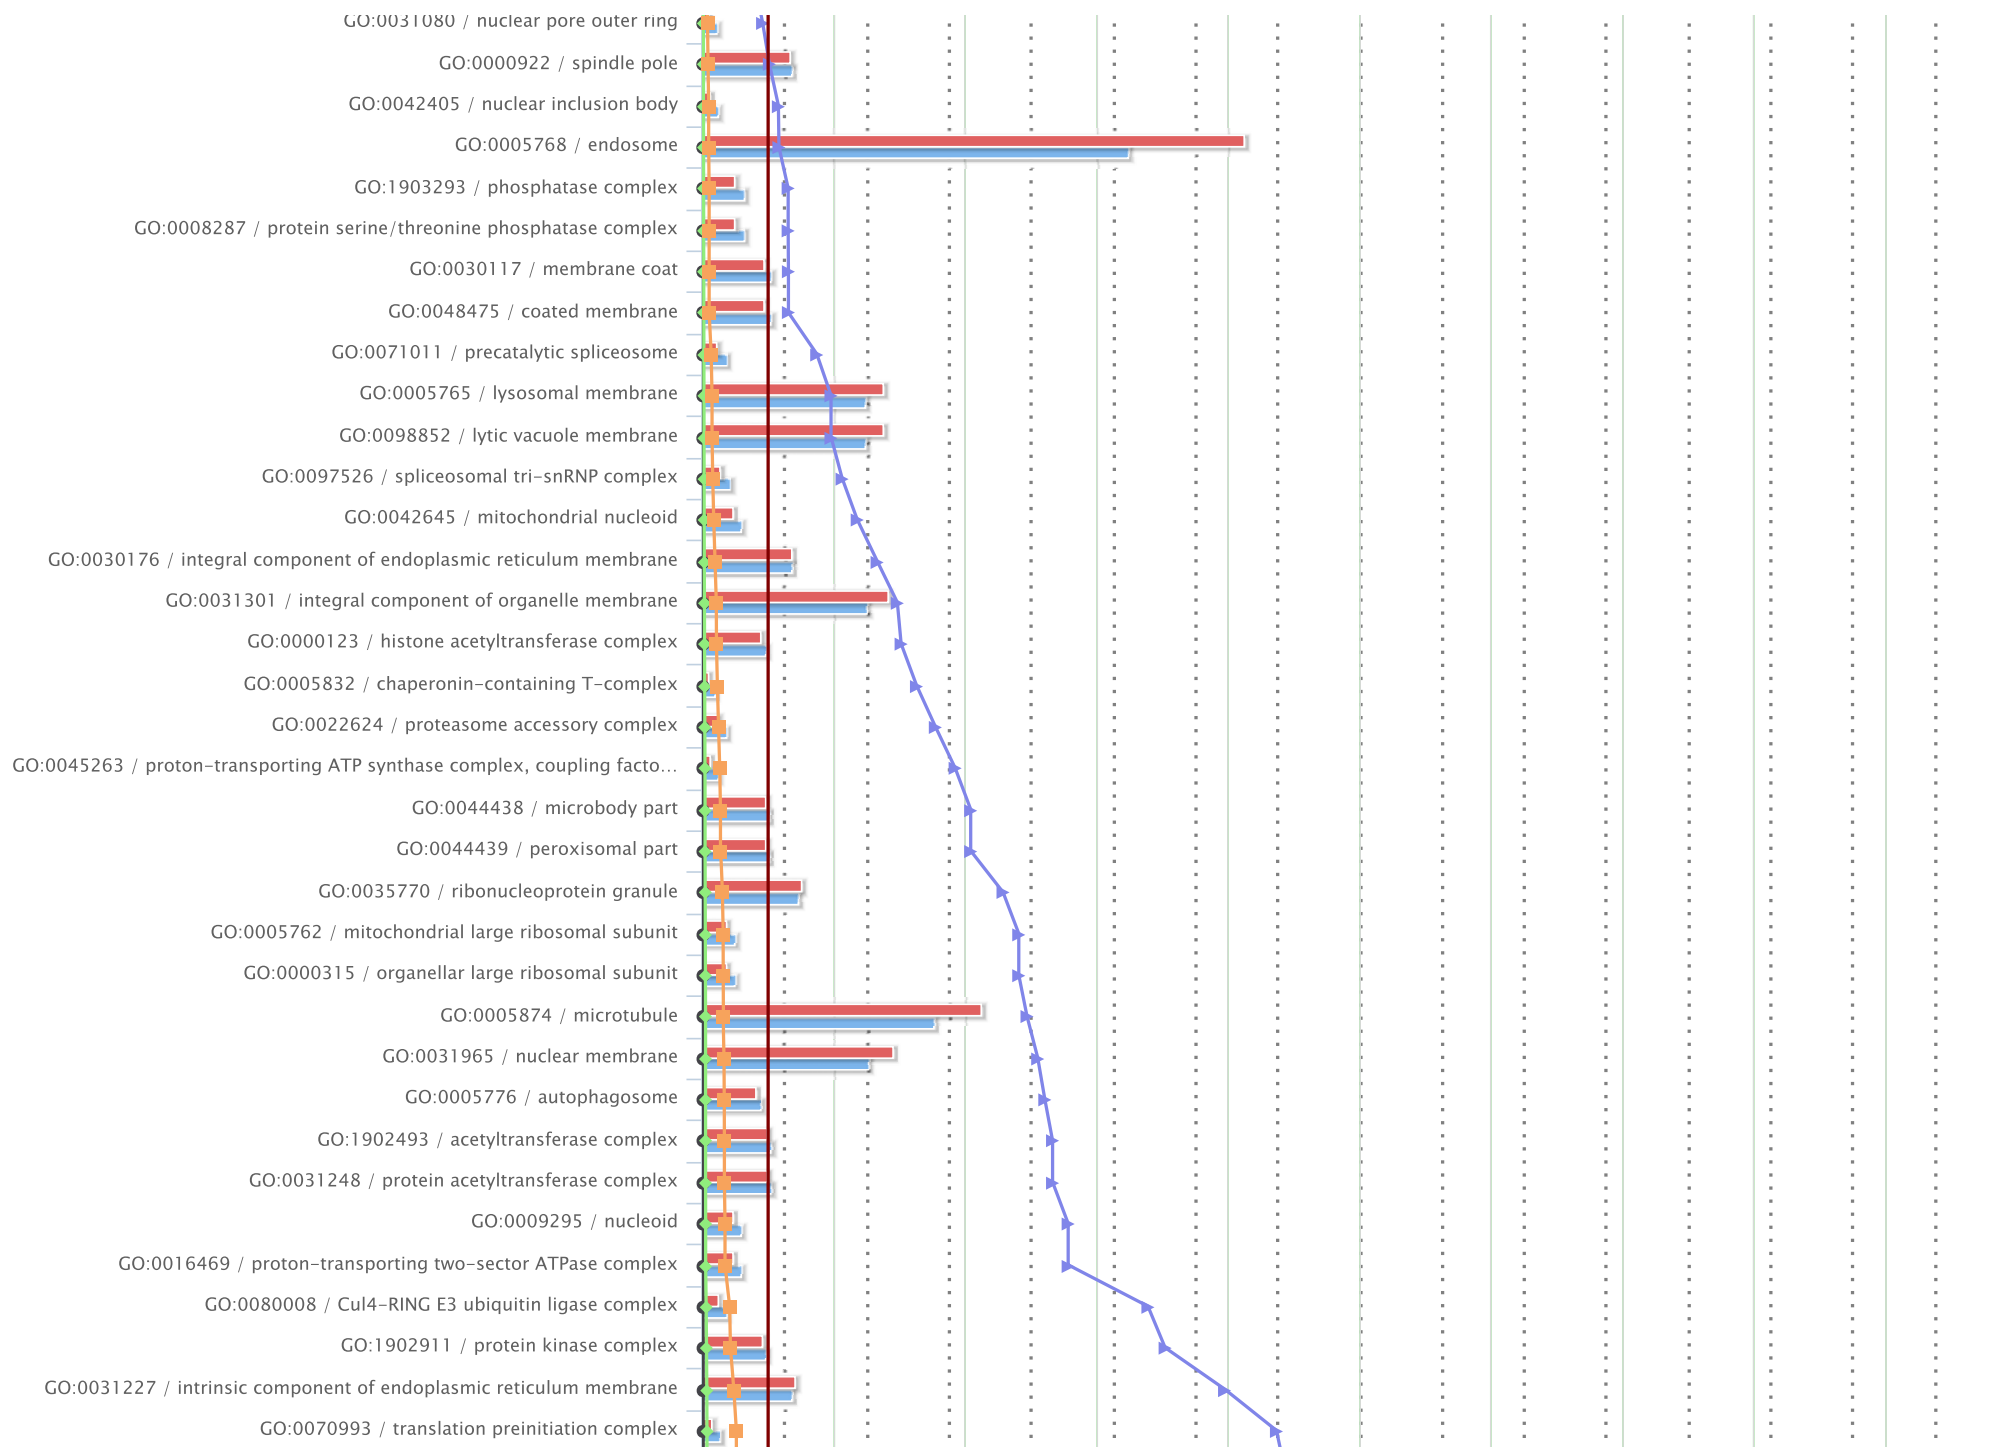

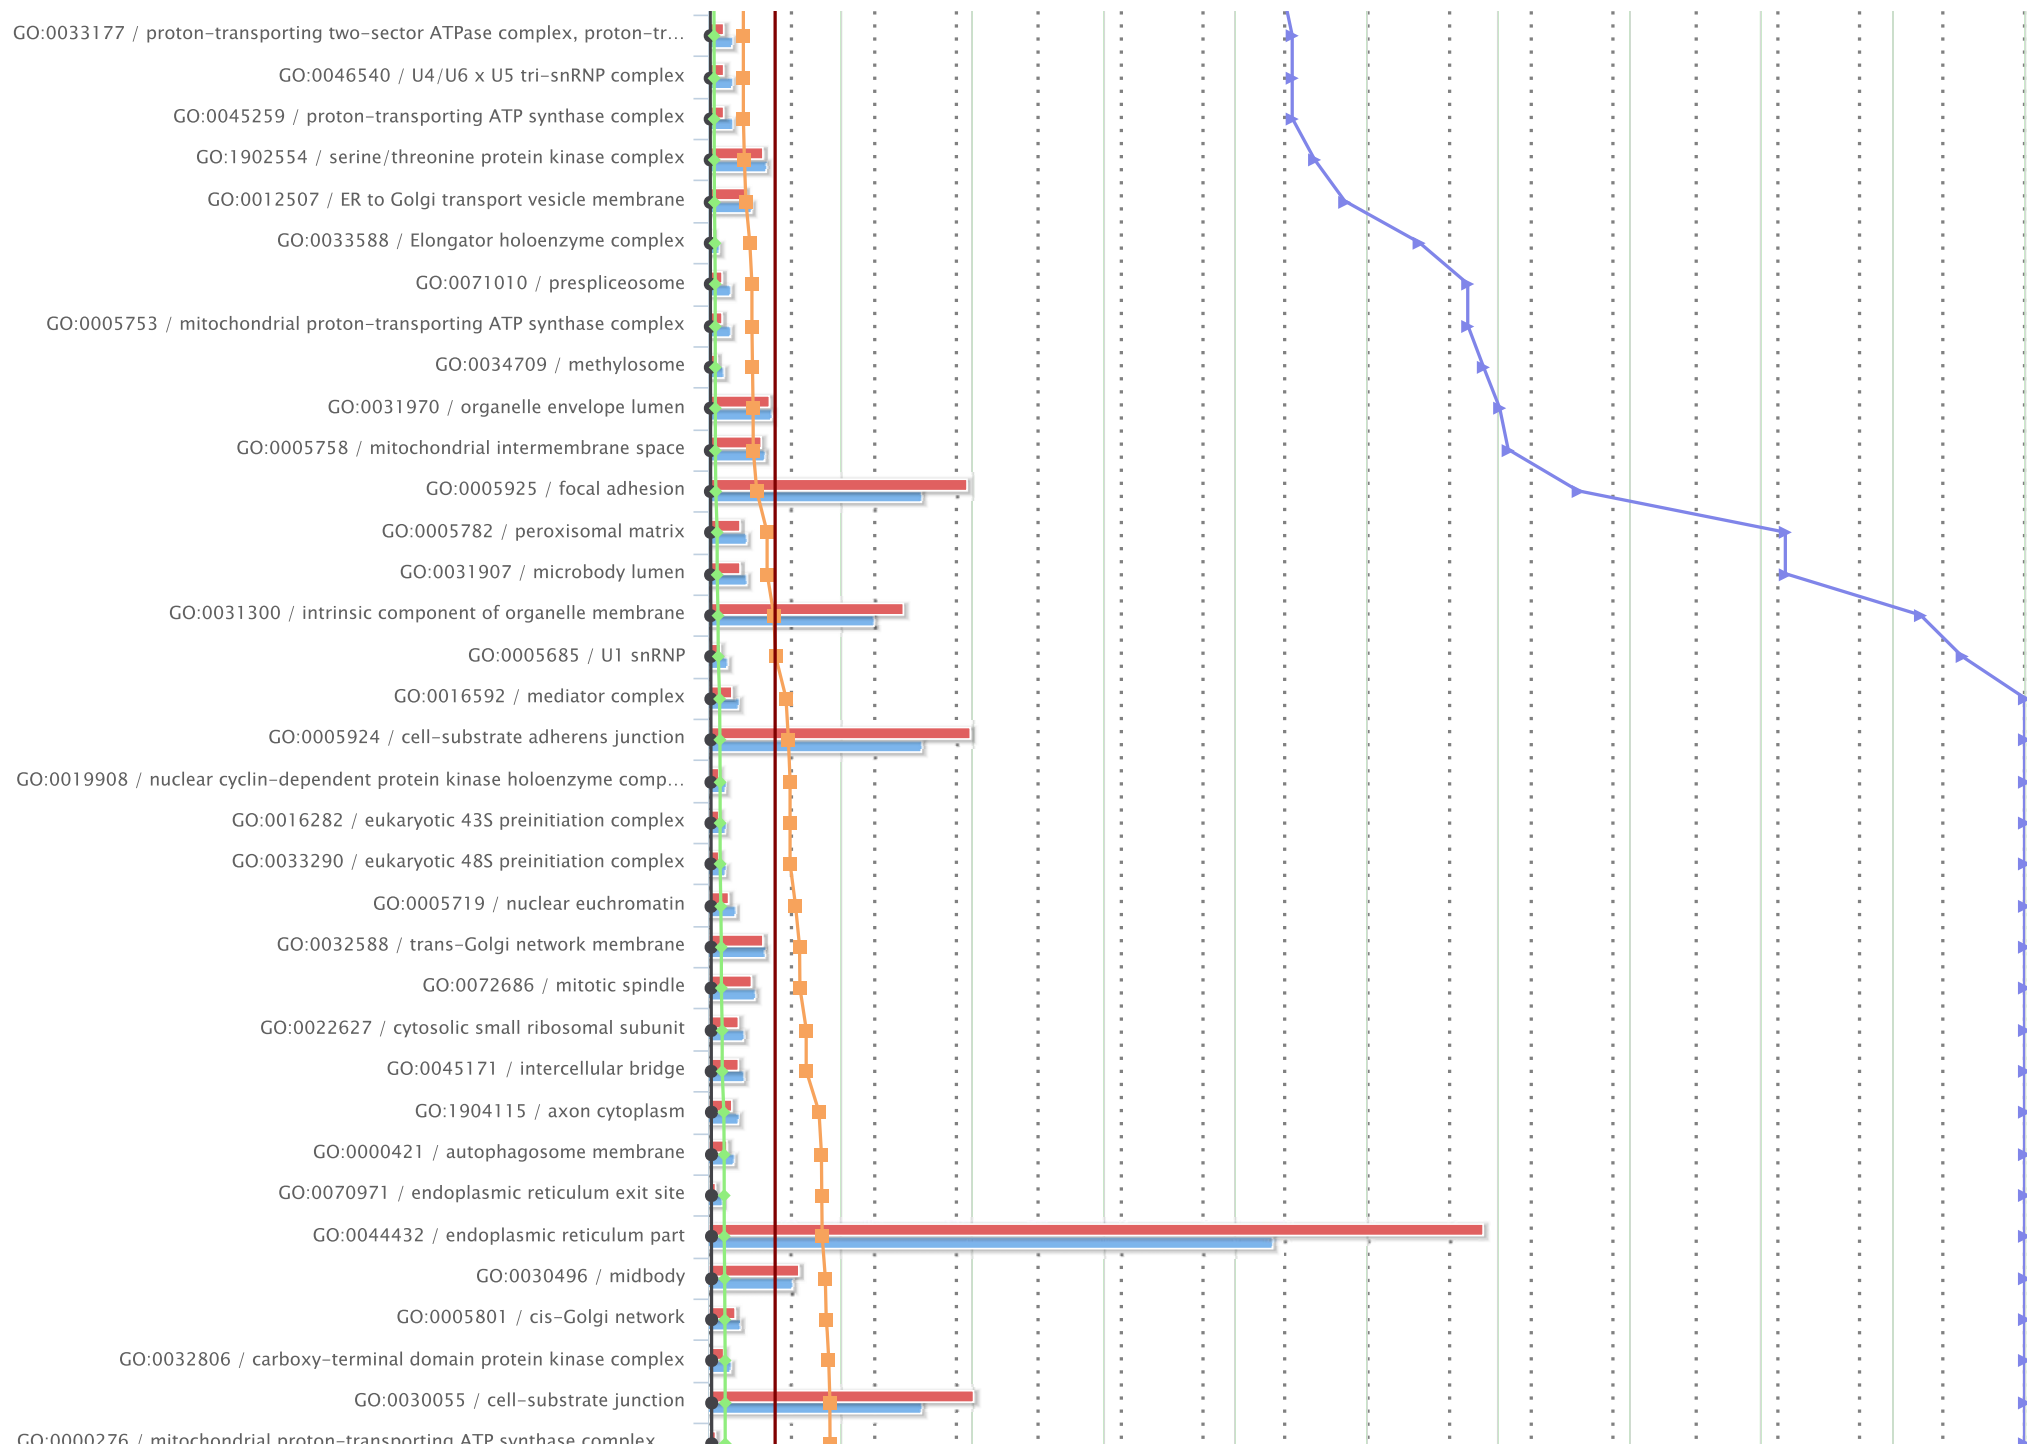

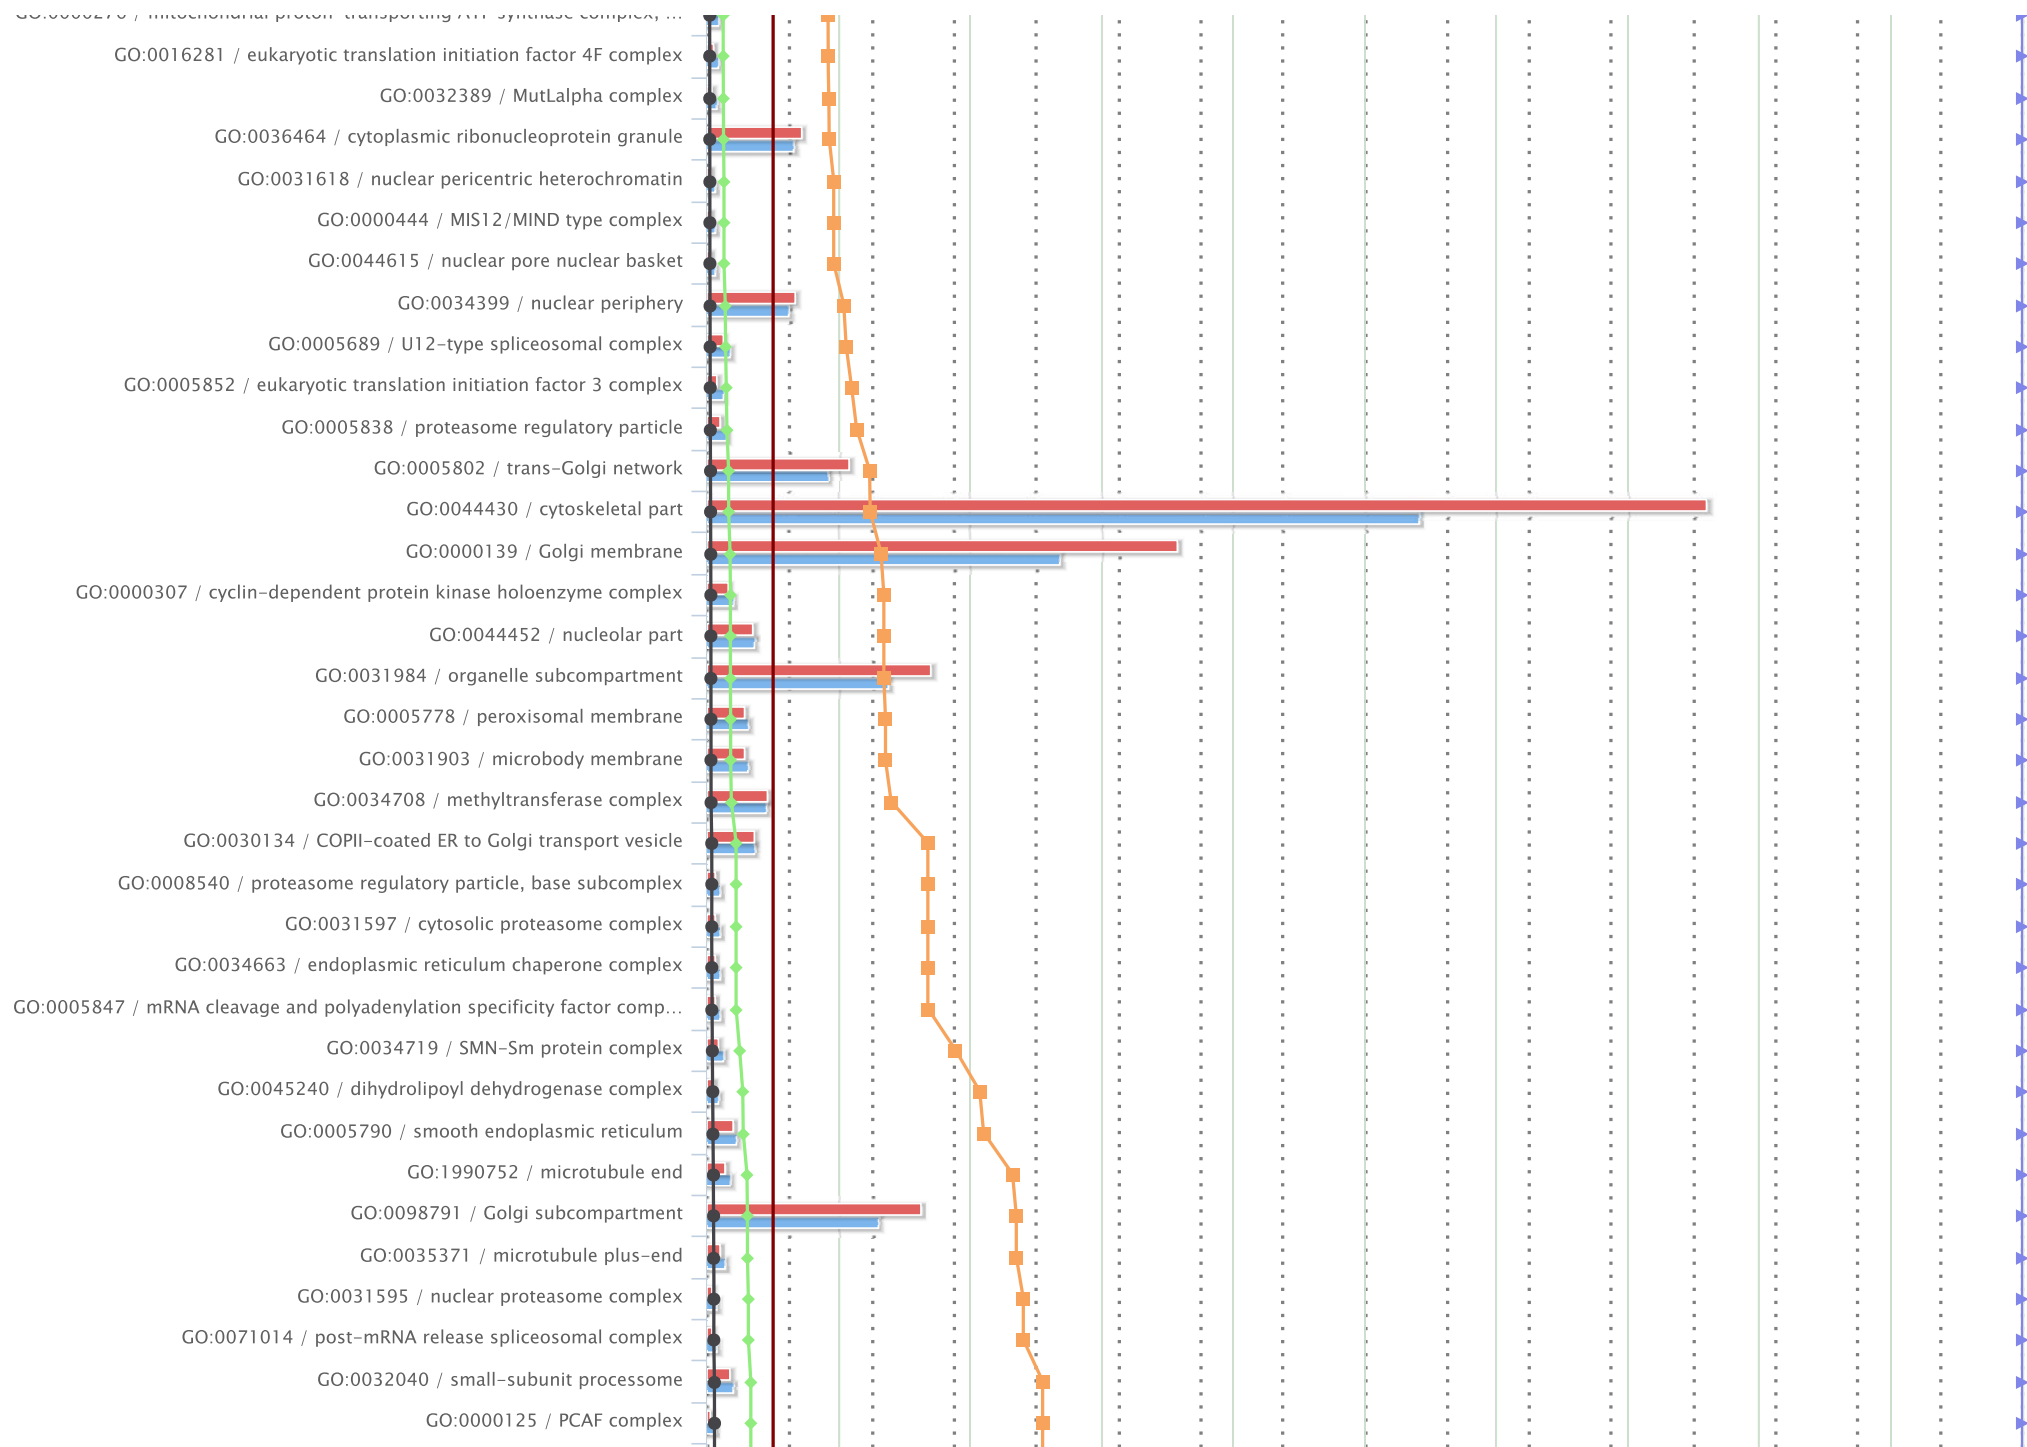

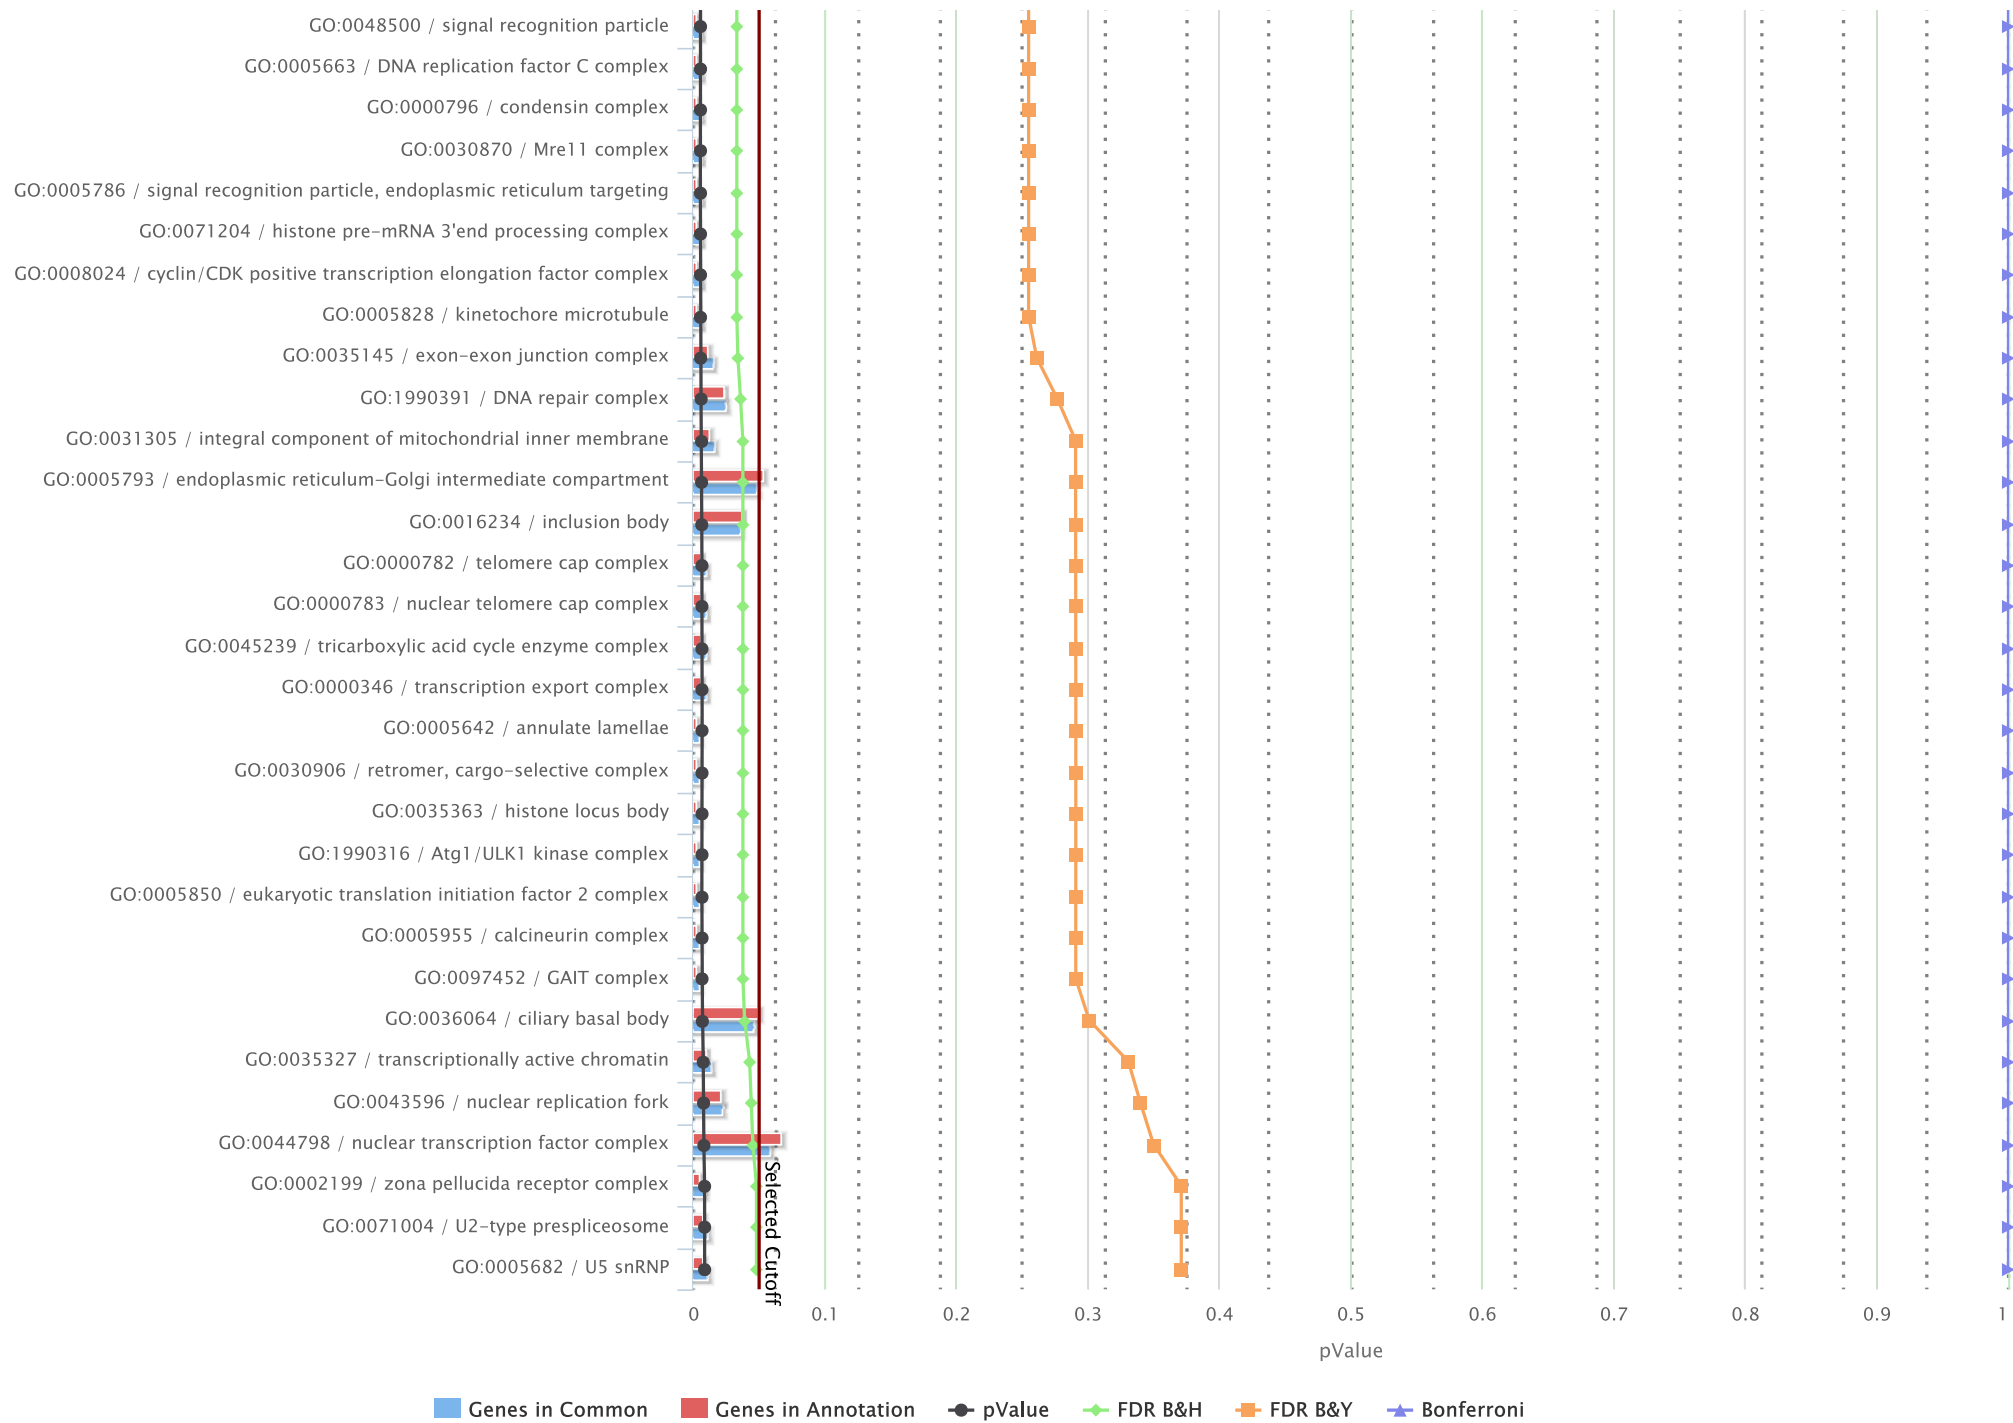

Supplement: Supplementary file 5 — Additional file 5. Supplementary Figure 5. Gene Ontology (GO) analysis of genes annotated to DARs using ToppFun. a Molecular function enrichment for hyperacetylated regions, b Biological process for hyperacetylated regions, c Cellular component for hyperacetylated regions, d Molecular function for hypoacetylated regions, e Biological process for hypoacetylated regions, f Cellular component for hypoacetylated regions. [file 13148_2020_895_MOESM5_ESM.pdf]
