# Supplementary material for: H3K27ac acetylome signatures reveal the epigenomic reorganization in remodeled non-failing human hearts
Source: Clin Epigenetics. 2020 Jul 14;12:106. doi: 10.1186/s13148-020-00895-5 (PMC7362435; doi:10.1186/s13148-020-00895-5)
Supplement: Supplementary file 7 — Additional file 7 Supplementary Table 1. Regions with different H3K27ac occupancy in patients compared with the control group (adjusted p value < 0.05). [file 13148_2020_895_MOESM7_ESM.xlsx]

## Sheet: Supplementary Table 1
Supplementary Table 1. Regions with different H3K27ac occupancy in patients compared with control group (adjusted p-value <0.05)
Region ID*	Chromosome	Region Start†	Region End†	Region Length	log2 Fold Change	Non-adjusted p-value‡	Adjusted p-value§			*: Regions were sorted by adjusted p-value from largest to smallest;
14749	chr5	86707100	86709649	2550	-0.991325	1.14385e-27	1.82866e-23			†: Genomic coordinates were indicated using human genome assembly GRCh37/hg19;
41308	chr17	49195050	49200529	5480	-0.800593	1.31186e-27	1.82866e-23			‡: Non-ajudsted p-value was calculated by Wald test;
30197	chr11	95521280	95525179	3900	-0.938591	4.58172e-27	4.25779e-23			§: Adjusted p-value was calculated by FDR-BH.
12766	chr4	83820850	83823399	2550	-0.900182	1.35106e-24	9.41655e-21
11293	chr3	160116030	160119079	3050	-1.04363	7.83446e-24	4.36834e-20
14610	chr5	73661350	73665749	4400	1.49683	3.81001e-23	1.77032e-19
7202	chr2	121630800	121635229	4430	1.66136	2.19758e-22	8.75235e-19
1748	chr1	53583400	53594299	10900	1.15636	2.88877e-22	1.00011e-18
42966	chr18	46419180	46424849	5670	1.45449	3.22861e-22	1.00011e-18
8239	chr2	218611600	218619329	7730	1.37921	4.12548e-22	1.15014e-18
2643	chr1	115123050	115125779	2730	-1.05641	9.62435e-22	2.43925e-18
16914	chr6	27098480	27101999	3520	-1.18756	1.29724e-21	2.70547e-18
27094	chr10	80527130	80533779	6650	1.44426	1.34312e-21	2.70547e-18
46331	chr20	48786550	48790399	3850	-0.742029	1.35861e-21	2.70547e-18
35626	chr14	102413080	102416299	3220	-0.688991	1.70368e-21	3.16646e-18
45894	chr20	33290580	33295849	5270	-0.704137	4.67386e-21	8.14391e-18
16876	chr6	26042500	26047079	4580	-1.13406	7.28286e-21	1.19435e-17
6624	chr2	88925080	88929279	4200	-0.79756	1.4838e-20	2.29816e-17
41187	chr17	46968400	46971779	3380	-0.872476	1.83081e-20	2.68638e-17
21959	chr8	27529000	27532379	3380	1.40342	2.01812e-20	2.81316e-17
19543	chr7	30833600	30838249	4650	1.24805	3.0919e-20	4.10471e-17
45612	chr20	18487180	18489799	2620	-0.852113	3.30121e-20	4.18338e-17
39175	chr16	70229730	70233549	3820	1.29947	3.65729e-20	4.43312e-17
19776	chr7	44644550	44648249	3700	-0.854443	6.84468e-20	7.95095e-17
37188	chr15	81464630	81467079	2450	1.30425	7.41145e-20	8.26495e-17
8238	chr2	218604250	218607149	2900	1.59284	1.00093e-19	1.07327e-16
26027	chr10	18945680	18949949	4270	-0.71519	1.87043e-19	1.93132e-16
1760	chr1	54056600	54060149	3550	1.45152	2.09138e-19	2.08234e-16
26358	chr10	35683730	35687749	4020	0.927028	2.27861e-19	2.19053e-16
42438	chr18	10025500	10030029	4530	1.53241	2.51109e-19	2.33355e-16
6148	chr2	61989900	61993029	3130	-0.783426	3.037e-19	2.67027e-16
14768	chr5	90438030	90441299	3270	1.58998	3.10942e-19	2.67027e-16
7787	chr2	178075930	178079279	3350	-0.949157	3.16076e-19	2.67027e-16
43726	chr19	8007030	8010099	3070	-0.927187	3.73997e-19	3.01913e-16
20694	chr7	108164050	108168149	4100	-0.864021	3.79029e-19	3.01913e-16
26271	chr10	32037400	32041349	3950	1.05948	4.0884e-19	3.16612e-16
20258	chr7	75795050	75797199	2150	-0.977895	4.89515e-19	3.60171e-16
28468	chr11	6501250	6504329	3080	-0.736498	4.90925e-19	3.60171e-16
34998	chr14	69362230	69367679	5450	1.37007	5.93282e-19	4.24105e-16
7958	chr2	198316750	198319629	2880	-0.915425	7.72463e-19	5.38387e-16
29053	chr11	43700780	43703729	2950	-0.820018	1.05352e-18	7.07316e-16
4166	chr1	212207230	212210329	3100	-0.903148	1.06558e-18	7.07316e-16
30262	chr11	105946580	105949829	3250	-0.85209	1.11931e-18	7.257e-16
40178	chr17	9955130	9959949	4820	1.24715	1.18626e-18	7.51628e-16
2932	chr1	149855980	149861129	5150	-0.996788	1.22474e-18	7.58765e-16
34390	chr14	23386500	23389999	3500	-1.01958	1.31278e-18	7.82844e-16
19437	chr7	25163400	25166599	3200	-0.8489	1.31976e-18	7.82844e-16
39180	chr16	70379250	70382749	3500	-0.880324	1.96199e-18	1.13955e-15
35134	chr14	74549730	74553049	3320	-0.976025	2.48942e-18	1.41638e-15
32487	chr12	107483850	107489149	5300	-0.831506	2.8281e-18	1.57689e-15
26272	chr10	32041850	32045199	3350	1.07939	4.62089e-18	2.526e-15
36955	chr15	74228050	74230729	2680	1.47368	5.4282e-18	2.91025e-15
20359	chr7	90031780	90037449	5670	-0.843707	7.09502e-18	3.73211e-15
25815	chr10	7585900	7589579	3680	1.09358	8.20929e-18	4.22223e-15
36956	chr15	74231130	74236349	5220	1.34491	8.32966e-18	4.22223e-15
44206	chr19	18754350	18757149	2800	1.43902	8.89704e-18	4.42929e-15
32038	chr12	64614730	64617529	2800	-0.874606	9.60848e-18	4.69956e-15
45805	chr20	30421000	30433879	12880	1.16064	9.91338e-18	4.76509e-15
28934	chr11	31530280	31532499	2220	-0.856425	1.15992e-17	5.4809e-15
26636	chr10	60025750	60030249	4500	-0.870393	1.59194e-17	7.39697e-15
26877	chr10	73495080	73499179	4100	1.19532	1.81265e-17	8.28442e-15
9936	chr3	53924500	53927429	2930	-1.03321	1.8835e-17	8.38345e-15
3453	chr1	171620230	171622629	2400	1.36974	1.89446e-17	8.38345e-15
35139	chr14	75046700	75053349	6650	0.911351	2.00427e-17	8.7308e-15
3034	chr1	153525000	153527849	2850	1.30042	2.18825e-17	9.38558e-15
13582	chr4	170540050	170543179	3130	-0.883915	2.38082e-17	1.00568e-14
35203	chr14	76126050	76128949	2900	-0.814382	2.68818e-17	1.1065e-14
5046	chr2	9303180	9308199	5020	1.28159	2.69889e-17	1.1065e-14
20059	chr7	66458530	66463079	4550	-0.872458	2.75935e-17	1.1149e-14
16854	chr6	24774180	24777029	2850	-0.88696	2.81821e-17	1.12241e-14
10407	chr3	101404050	101407599	3550	-0.712581	3.0036e-17	1.16402e-14
3729	chr1	186342700	186346079	3380	-0.784804	3.0062e-17	1.16402e-14
5814	chr2	43348400	43355049	6650	1.07088	3.16288e-17	1.19265e-14
20785	chr7	121782830	121785329	2500	-0.918301	3.16569e-17	1.19265e-14
45714	chr20	23337250	23344629	7380	-0.691231	3.582e-17	1.3315e-14
11032	chr3	138311730	138314099	2370	-0.966578	3.72861e-17	1.36776e-14
34332	chr14	20809400	20812999	3600	-0.891717	3.83066e-17	1.37404e-14
14371	chr5	56203980	56207249	3270	-0.792102	3.84429e-17	1.37404e-14
34851	chr14	64106650	64109999	3350	-0.810982	4.65906e-17	1.64418e-14
17554	chr6	44212400	44216449	4050	-0.694847	5.04063e-17	1.7566e-14
4260	chr1	218536550	218540249	3700	1.26601	7.51773e-17	2.58749e-14
31672	chr12	49410880	49414529	3650	-0.74977	7.89814e-17	2.68527e-14
16238	chr5	178682930	178687129	4200	1.55201	8.5473e-17	2.87097e-14
34565	chr14	35450350	35453499	3150	-0.676692	9.3528e-17	3.10413e-14
27811	chr10	115032080	115035149	3070	1.2753	9.6631e-17	3.16938e-14
22647	chr8	95089250	95091849	2600	1.51978	1.03668e-16	3.36067e-14
45221	chr19	57790350	57793399	3050	-0.722866	1.1936e-16	3.82486e-14
5509	chr2	29287050	29289529	2480	1.36244	1.34743e-16	4.23575e-14
2928	chr1	149802600	149805849	3250	-0.844094	1.35221e-16	4.23575e-14
9565	chr3	42891780	42895549	3770	1.63048	1.63091e-16	5.05202e-14
9042	chr3	13317180	13320729	3550	1.36164	1.72587e-16	5.27844e-14
40188	chr17	10038080	10041149	3070	1.22523	1.74187e-16	5.27844e-14
23030	chr8	125485430	125488729	3300	-0.682637	1.76277e-16	5.28434e-14
3301	chr1	162759150	162761899	2750	-0.9064	1.9727e-16	5.85073e-14
44170	chr19	18312630	18317299	4670	-0.680795	2.00097e-16	5.87211e-14
26190	chr10	30027400	30032629	5230	1.18089	2.07721e-16	6.03236e-14
12477	chr4	47486280	47488729	2450	-0.8166	2.30297e-16	6.61902e-14
12454	chr4	41991530	41994029	2500	-0.85617	2.35318e-16	6.69433e-14
44454	chr19	36543800	36546879	3080	-0.820389	2.59968e-16	7.32085e-14
48240	chr22	42485200	42488429	3230	-0.730675	2.87015e-16	8.00168e-14
12706	chr4	77673100	77676899	3800	1.20861	3.17225e-16	8.75635e-14
10619	chr3	122800550	122805429	4880	0.790205	3.2142e-16	8.78516e-14
46718	chr21	30373800	30376749	2950	-0.741344	3.42497e-16	9.27038e-14
14522	chr5	68512750	68516299	3550	-0.764065	3.64154e-16	9.76178e-14
15151	chr5	134072330	134075629	3300	-0.723744	3.78311e-16	1.00447e-13
20696	chr7	108208730	108211979	3250	-0.669719	4.07827e-16	1.07262e-13
21914	chr8	26296100	26299699	3600	1.22878	4.18831e-16	1.09127e-13
3426	chr1	169452300	169458129	5830	-0.762025	4.6783e-16	1.20765e-13
26391	chr10	38643700	38646499	2800	-0.83949	4.80905e-16	1.23001e-13
31918	chr12	56508530	56515129	6600	-0.665924	5.06189e-16	1.28291e-13
44783	chr19	46086030	46090279	4250	-0.795756	6.76549e-16	1.69612e-13
2851	chr1	145505750	145509029	3280	-0.693577	6.81394e-16	1.69612e-13
16998	chr6	30537730	30540649	2920	-0.828101	6.95851e-16	1.70288e-13
15951	chr5	169785230	169790249	5020	0.932117	6.96324e-16	1.70288e-13
1721	chr1	52869200	52871549	2350	-0.883305	7.0279e-16	1.70375e-13
26127	chr10	27442050	27445129	3080	-0.790555	9.00785e-16	2.16491e-13
25907	chr10	13340280	13345949	5670	-0.672428	9.21619e-16	2.19605e-13
8458	chr2	232503180	232514129	10950	-0.589571	9.86526e-16	2.33079e-13
37034	chr15	75741850	75749529	7680	-0.639295	1.05326e-15	2.46754e-13
12533	chr4	53733200	53738649	5450	0.823131	1.09363e-15	2.54079e-13
6354	chr2	71293880	71297199	3320	-0.629649	1.31193e-15	3.00435e-13
44600	chr19	41254350	41259049	4700	-0.659581	1.31472e-15	3.00435e-13
29784	chr11	69874000	69877399	3400	1.4276	1.41897e-15	3.21622e-13
10979	chr3	134048900	134057129	8230	0.766074	1.43402e-15	3.22411e-13
24978	chr9	128002200	128005329	3130	-0.632317	1.50664e-15	3.32189e-13
15410	chr5	141624600	141627429	2830	1.4964	1.50848e-15	3.32189e-13
23233	chr8	135842750	135846479	3730	-0.648076	1.51326e-15	3.32189e-13
15240	chr5	137877280	137881299	4020	-0.663561	1.62475e-15	3.5166e-13
8596	chr2	238098730	238101699	2970	1.17394	1.62718e-15	3.5166e-13
30070	chr11	82903300	82906729	3430	-0.701195	1.67854e-15	3.59969e-13
17279	chr6	36633530	36636249	2720	1.354	1.70132e-15	3.62069e-13
5864	chr2	45483380	45487579	4200	1.28877	1.72608e-15	3.64557e-13
21338	chr7	157188030	157199899	11870	0.636399	1.80687e-15	3.78749e-13
27069	chr10	80094150	80099099	4950	1.22456	1.83529e-15	3.81836e-13
19549	chr7	30881700	30887579	5880	1.14611	1.87343e-15	3.86883e-13
5018	chr2	8594430	8597299	2870	1.44691	1.91082e-15	3.91703e-13
16873	chr6	26019880	26023279	3400	-1.07114	1.96633e-15	3.99368e-13
14011	chr5	14416050	14419079	3030	1.09026	1.97686e-15	3.99368e-13
20827	chr7	128377850	128380979	3130	-0.859772	2.20163e-15	4.41577e-13
33715	chr13	48610950	48613549	2600	-0.803082	2.24027e-15	4.44305e-13
35542	chr14	99945300	99949079	3780	-0.769267	2.2471e-15	4.44305e-13
15089	chr5	132105280	132114679	9400	0.662709	2.29613e-15	4.50802e-13
4090	chr1	208200930	208206679	5750	0.963012	2.32304e-15	4.52895e-13
3355	chr1	166049900	166052099	2200	1.44881	2.44231e-15	4.72842e-13
39484	chr16	84949530	84952949	3420	1.19048	2.48373e-15	4.77544e-13
11190	chr3	150478780	150482729	3950	-0.731655	2.51743e-15	4.80708e-13
2929	chr1	149812300	149815879	3580	-0.961124	2.57756e-15	4.88841e-13
7473	chr2	157187850	157192579	4730	-0.674821	2.61393e-15	4.92389e-13
3774	chr1	201139130	201141449	2320	-0.842035	2.7246e-15	5.09792e-13
16989	chr6	30179830	30183249	3420	-0.68287	2.87075e-15	5.33558e-13
18033	chr6	111301880	111304579	2700	-0.694036	2.89209e-15	5.33964e-13
24290	chr9	94181880	94188179	6300	-0.89775	2.91411e-15	5.34489e-13
8235	chr2	218576800	218580729	3930	0.888945	3.00756e-15	5.48024e-13
14745	chr5	83677200	83681149	3950	1.4565	3.2247e-15	5.83775e-13
16997	chr6	30522000	30526299	4300	-0.622453	3.30276e-15	5.94049e-13
1207	chr1	32858550	32861679	3130	-0.758768	3.49701e-15	6.24955e-13
26229	chr10	31063330	31066129	2800	1.3096	3.56183e-15	6.32486e-13
30679	chr11	125125250	125127849	2600	1.33159	3.63467e-15	6.41336e-13
26770	chr10	70882300	70885579	3280	-0.628095	3.71471e-15	6.51337e-13
8256	chr2	218863600	218872179	8580	0.91373	3.86335e-15	6.73164e-13
43647	chr19	5789950	5792499	2550	-0.711194	3.96617e-15	6.86787e-13
17218	chr6	35053700	35058229	4530	0.976805	4.36656e-15	7.51453e-13
31325	chr12	16033950	16036799	2850	-0.822858	4.61797e-15	7.89843e-13
12223	chr4	15385500	15387949	2450	1.36904	4.8762e-15	8.28923e-13
13091	chr4	120986830	120990279	3450	-0.716245	5.03871e-15	8.51358e-13
11593	chr3	185654280	185657429	3150	-0.692684	5.18928e-15	8.71518e-13
40977	chr17	41493130	41497449	4320	1.07957	5.22458e-15	8.72191e-13
42860	chr18	43196680	43201199	4520	1.21422	5.46869e-15	9.0751e-13
4702	chr1	235157080	235160379	3300	1.01373	5.6746e-15	9.36107e-13
39255	chr16	73126150	73131349	5200	0.942724	5.77349e-15	9.46818e-13
15192	chr5	136476980	136479229	2250	1.37209	6.27198e-15	1.02248e-12
40929	chr17	40609350	40612299	2950	-0.791559	6.30824e-15	1.02248e-12
23897	chr9	37942730	37946929	4200	1.10463	6.39457e-15	1.03049e-12
42443	chr18	10058850	10065949	7100	0.728272	6.49231e-15	1.04022e-12
34407	chr14	23753830	23756999	3170	-0.73164	6.58976e-15	1.0498e-12
41822	chr17	73284200	73286999	2800	-0.698888	6.68408e-15	1.05878e-12
1682	chr1	48278930	48282029	3100	1.3242	6.86865e-15	1.08187e-12
22273	chr8	49557550	49563779	6230	0.919148	8.18209e-15	1.28151e-12
15341	chr5	139942480	139945699	3220	-0.64207	8.46672e-15	1.31868e-12
42545	chr18	13725030	13728279	3250	-0.739076	8.93137e-15	1.38332e-12
29669	chr11	67271250	67277529	6280	-0.720392	1.02638e-14	1.57253e-12
27535	chr10	101490550	101493629	3080	-0.687622	1.02658e-14	1.57253e-12
2953	chr1	150265180	150267629	2450	-0.902931	1.07229e-14	1.63089e-12
4924	chr2	1653650	1658199	4550	1.00597	1.0795e-14	1.63089e-12
16885	chr6	26194950	26200699	5750	-1.11825	1.08223e-14	1.63089e-12
17054	chr6	31586730	31589999	3270	-0.725661	1.12703e-14	1.68927e-12
43198	chr18	60821580	60825049	3470	0.990205	1.14657e-14	1.70937e-12
21114	chr7	140622700	140627149	4450	-0.817973	1.17692e-14	1.743e-12
9156	chr3	16305030	16308949	3920	-0.868569	1.18163e-14	1.743e-12
7982	chr2	201605150	201608699	3550	1.03792	1.2837e-14	1.88359e-12
36965	chr15	74330350	74341499	11150	0.905916	1.38836e-14	2.0265e-12
31186	chr12	8177500	8180899	3400	-0.774616	1.45622e-14	2.11448e-12
35576	chr14	100568150	100576699	8550	0.872184	1.4728e-14	2.12045e-12
39266	chr16	74430830	74433729	2900	1.22536	1.47818e-14	2.12045e-12
41466	chr17	58040800	58043949	3150	-0.642837	1.48315e-14	2.12045e-12
2551	chr1	111505080	111507429	2350	-0.857672	1.52996e-14	2.17621e-12
14259	chr5	41903000	41906549	3550	-0.883343	1.53942e-14	2.17856e-12
12401	chr4	39459100	39462049	2950	-0.722464	1.55105e-14	2.18393e-12
12953	chr4	103788330	103791679	3350	-0.737086	1.59344e-14	2.23233e-12
28671	chr11	12176550	12179299	2750	1.06649	1.82971e-14	2.55052e-12
16874	chr6	26024500	26028279	3780	-1.12543	1.90806e-14	2.6465e-12
22729	chr8	98962180	98965779	3600	1.22918	1.93314e-14	2.66801e-12
45079	chr19	52691300	52696899	5600	-0.552366	1.9763e-14	2.71415e-12
42449	chr18	10245150	10248649	3500	1.10083	2.01279e-14	2.75072e-12
43122	chr18	56517400	56520779	3380	1.11409	2.09635e-14	2.85094e-12
34973	chr14	69073100	69077949	4850	0.841721	2.1448e-14	2.90266e-12
35005	chr14	69430050	69439649	9600	0.811923	2.17256e-14	2.92226e-12
17376	chr6	39849250	39857479	8230	0.774837	2.18024e-14	2.92226e-12
8274	chr2	219431680	219440029	8350	-0.74528	2.20578e-14	2.94234e-12
31155	chr12	6959800	6963099	3300	-0.729002	2.49651e-14	3.31429e-12
34765	chr14	58710580	58712879	2300	-0.790542	2.54724e-14	3.36562e-12
29838	chr11	72144250	72147049	2800	-0.814532	2.56562e-14	3.37391e-12
43447	chr19	2162350	2173399	11050	-0.64189	2.60214e-14	3.40587e-12
17005	chr6	30683800	30692999	9200	-0.615434	2.6281e-14	3.42378e-12
3485	chr1	174967200	174970449	3250	-0.76998	2.73683e-14	3.53454e-12
31142	chr12	6770980	6773229	2250	-0.981331	2.73848e-14	3.53454e-12
48239	chr22	42474000	42477349	3350	-0.634108	2.89106e-14	3.71428e-12
40887	chr17	39843500	39847499	4000	-0.695161	2.93604e-14	3.75476e-12
37086	chr15	77816650	77824029	7380	0.779044	3.00867e-14	3.83008e-12
47643	chr22	27634630	27639079	4450	1.27247	3.13946e-14	3.97841e-12
23593	chr9	6756250	6759779	3530	-0.619858	3.50863e-14	4.40748e-12
1584	chr1	45137600	45141329	3730	-0.571355	3.50967e-14	4.40748e-12
16933	chr6	27803680	27807779	4100	-0.860034	3.70178e-14	4.62789e-12
21960	chr8	27559200	27561579	2380	1.26668	3.7373e-14	4.65144e-12
17844	chr6	88298500	88301199	2700	-0.721566	4.07346e-14	5.04729e-12
31220	chr12	10363050	10367449	4400	-0.659523	4.13936e-14	5.10625e-12
38609	chr16	30644150	30647279	3130	-0.749578	4.26587e-14	5.23912e-12
40256	chr17	15370600	15374299	3700	1.03641	4.775e-14	5.8387e-12
3464	chr1	172500350	172503929	3580	-0.819709	4.90593e-14	5.9726e-12
31305	chr12	14921630	14924699	3070	-0.719688	5.03706e-14	6.10558e-12
15975	chr5	170946300	170948899	2600	1.15321	5.08121e-14	6.13243e-12
20045	chr7	65957100	65960129	3030	-0.631572	5.46938e-14	6.57245e-12
26233	chr10	31105850	31112429	6580	0.983437	5.54743e-14	6.63764e-12
16882	chr6	26171100	26174479	3380	-0.915873	5.59577e-14	6.66685e-12
13581	chr4	170532480	170534729	2250	-0.823674	5.78863e-14	6.86729e-12
25190	chr9	132042300	132046549	4250	0.911924	5.84158e-14	6.90073e-12
33750	chr13	49821100	49823379	2280	-0.848383	6.03871e-14	7.10351e-12
12582	chr4	57251850	57255449	3600	-0.863617	6.06468e-14	7.10408e-12
26261	chr10	31905650	31910799	5150	0.88943	6.29213e-14	7.33968e-12
43822	chr19	10762880	10767749	4870	-0.614687	6.87631e-14	7.98769e-12
21396	chr8	1038300	1040429	2130	1.64599	7.31409e-14	8.46098e-12
27093	chr10	80522900	80525749	2850	1.27432	7.60853e-14	8.76522e-12
20876	chr7	130019000	130021649	2650	1.38125	7.69794e-14	8.83173e-12
31943	chr12	57038200	57041549	3350	-0.572135	8.75113e-14	9.98429e-12
28445	chr11	4114550	4117599	3050	-0.663022	8.77417e-14	9.98429e-12
41190	chr17	47268550	47272129	3580	-0.70366	8.92672e-14	1.01166e-11
37512	chr15	92575780	92578549	2770	1.0649	9.33744e-14	1.05392e-11
27126	chr10	81044580	81051299	6720	0.761485	9.64342e-14	1.08407e-11
47654	chr22	27971200	27976429	5230	1.0213	1.0231e-13	1.1455e-11
27531	chr10	101186380	101192149	5770	-0.766867	1.03405e-13	1.15313e-11
30631	chr11	123063750	123067799	4050	1.25332	1.06431e-13	1.18215e-11
16152	chr5	175814330	175818129	3800	-0.638366	1.08272e-13	1.19783e-11
47650	chr22	27831280	27836129	4850	1.0541	1.12783e-13	1.2428e-11
8248	chr2	218739950	218746849	6900	0.65339	1.17343e-13	1.28796e-11
5909	chr2	46368330	46372049	3720	1.07953	1.17999e-13	1.29007e-11
2318	chr1	93644380	93647529	3150	-0.762332	1.22179e-13	1.33056e-11
14636	chr5	76114200	76117029	2830	1.14988	1.23902e-13	1.34408e-11
40121	chr17	8088050	8097029	8980	-0.540545	1.3575e-13	1.46689e-11
5484	chr2	28864500	28869849	5350	1.1459	1.44886e-13	1.55957e-11
26228	chr10	31040450	31044879	4430	1.09867	1.47056e-13	1.57684e-11
34445	chr14	24710250	24713299	3050	-0.595129	1.54994e-13	1.65558e-11
15781	chr5	156568350	156571779	3430	-0.602701	1.58261e-13	1.68403e-11
23741	chr9	33075350	33078029	2680	-0.698069	1.60321e-13	1.69946e-11
580	chr1	15849400	15854699	5300	-0.767734	1.66317e-13	1.75634e-11
16881	chr6	26155600	26160029	4430	-1.19335	1.80673e-13	1.89509e-11
33180	chr13	20206400	20209349	2950	-0.753767	1.80815e-13	1.89509e-11
35138	chr14	75032700	75040579	7880	1.05602	1.81847e-13	1.89877e-11
45443	chr20	5092300	5095049	2750	-0.641284	1.9817e-13	2.06148e-11
44585	chr19	40968980	40974449	5470	-0.668917	2.01307e-13	2.08633e-11
7293	chr2	129042580	129046329	3750	1.06832	2.07214e-13	2.1396e-11
40126	chr17	8149880	8153929	4050	-0.853912	2.10165e-13	2.16206e-11
3209	chr1	157991700	157996829	5130	0.886559	2.12923e-13	2.18238e-11
18600	chr6	153322330	153325399	3070	-0.666597	2.41673e-13	2.46799e-11
40623	chr17	28442830	28445199	2370	-0.790363	2.51793e-13	2.55982e-11
2116	chr1	70875700	70878049	2350	-0.925816	2.52502e-13	2.55982e-11
47902	chr22	35693400	35697599	4200	-0.722556	2.58067e-13	2.60183e-11
16970	chr6	29616500	29618699	2200	-0.81154	2.58513e-13	2.60183e-11
9057	chr3	13576780	13581149	4370	1.20872	2.61393e-13	2.62136e-11
42440	chr18	10034500	10040829	6330	1.13961	2.72804e-13	2.71999e-11
40801	chr17	37249350	37258849	9500	0.752874	2.73179e-13	2.71999e-11
40464	chr17	19605450	19608779	3330	0.932433	2.80596e-13	2.78389e-11
20803	chr7	127290500	127293499	3000	-0.743261	2.82283e-13	2.78671e-11
43913	chr19	12720880	12723129	2250	-0.964122	2.8319e-13	2.78671e-11
36153	chr15	41522030	41524949	2920	-0.736873	2.83879e-13	2.78671e-11
16916	chr6	27112600	27116149	3550	-0.874073	2.99234e-13	2.92714e-11
8841	chr3	5047650	5049749	2100	1.31286	3.56204e-13	3.47225e-11
3066	chr1	153961680	153964599	2920	-0.752312	3.70393e-13	3.59798e-11
16369	chr6	2998380	3001599	3220	-0.679737	3.83923e-13	3.71646e-11
19009	chr6	170861080	170864829	3750	-0.821899	3.98211e-13	3.84143e-11
9237	chr3	23985480	23990479	5000	-0.935472	4.16723e-13	4.00615e-11
38996	chr16	58662000	58665279	3280	-0.680454	4.18818e-13	4.01245e-11
34620	chr14	50327500	50330929	3430	-0.778099	4.26474e-13	4.07181e-11
29898	chr11	73489250	73491879	2630	-0.757913	4.44908e-13	4.23331e-11
6340	chr2	70519350	70522279	2930	-0.716275	4.7041e-13	4.4564e-11
46899	chr21	38934000	38940899	6900	-0.613641	4.71551e-13	4.4564e-11
15950	chr5	169779800	169783199	3400	0.988703	4.8479e-13	4.56325e-11
47807	chr22	32020330	32023549	3220	1.02868	4.86131e-13	4.56325e-11
5386	chr2	26567350	26570499	3150	-0.670343	4.91623e-13	4.59932e-11
19525	chr7	30322350	30326629	4280	-0.806067	4.96124e-13	4.6259e-11
2246	chr1	89456680	89460549	3870	-0.686969	5.06204e-13	4.70415e-11
34867	chr14	64853330	64856329	3000	-0.635119	5.13849e-13	4.75934e-11
35411	chr14	92354300	92357879	3580	1.03047	5.19749e-13	4.79211e-11
5912	chr2	46383430	46386429	3000	1.06292	5.20826e-13	4.79211e-11
7272	chr2	128436380	128440449	4070	0.872719	5.24253e-13	4.80778e-11
48358	chr22	45033980	45037529	3550	1.48701	5.36783e-13	4.90655e-11
46330	chr20	48779450	48785829	6380	-0.594178	5.57439e-13	5.07871e-11
9059	chr3	13585880	13592849	6970	1.05576	5.82791e-13	5.29239e-11
38926	chr16	57442480	57446749	4270	0.860013	5.88183e-13	5.32401e-11
4107	chr1	208353930	208356999	3070	0.966992	6.14902e-13	5.54785e-11
44592	chr19	41145050	41149129	4080	0.946988	6.34938e-13	5.71014e-11
31909	chr12	56365950	56369429	3480	-0.66379	6.38521e-13	5.7239e-11
4180	chr1	212457050	212460979	3930	-0.710468	6.53607e-13	5.84036e-11
4532	chr1	229642780	229645679	2900	-0.704728	6.58404e-13	5.85827e-11
33557	chr13	41050830	41059349	8520	0.664404	6.59815e-13	5.85827e-11
32924	chr12	122524000	122527549	3550	0.846461	6.76115e-13	5.98394e-11
5333	chr2	25193130	25197579	4450	-0.61761	7.17833e-13	6.33306e-11
24299	chr9	94907830	94911149	3320	1.05279	7.70766e-13	6.77861e-11
40118	chr17	8050400	8069129	18730	-0.58616	8.0521e-13	7.05926e-11
9060	chr3	13592980	13596699	3720	0.999222	8.10601e-13	7.0725e-11
43318	chr18	77333950	77339749	5800	0.803773	8.11794e-13	7.0725e-11
13482	chr4	159591400	159595129	3730	-0.659658	8.46459e-13	7.35153e-11
9102	chr3	14882580	14884949	2370	1.08881	8.5295e-13	7.3849e-11
46075	chr20	40017700	40028049	10350	0.802219	8.60275e-13	7.42526e-11
26459	chr10	44846450	44849699	3250	0.971305	8.92022e-13	7.67442e-11
21060	chr7	139042730	139046549	3820	-0.635319	8.94647e-13	7.67442e-11
38931	chr16	57510530	57515379	4850	0.948801	9.49099e-13	8.1045e-11
35001	chr14	69393750	69396679	2930	0.985567	9.50597e-13	8.1045e-11
13182	chr4	130013330	130015649	2320	-1.0155	9.71499e-13	8.25745e-11
44686	chr19	44257400	44260629	3230	-0.690051	1.01396e-12	8.59212e-11
13284	chr4	144433530	144436949	3420	-0.61875	1.02871e-12	8.6907e-11
38213	chr16	14722550	14728629	6080	-0.591429	1.08491e-12	9.1275e-11
21533	chr8	10695900	10698679	2780	-0.956948	1.08696e-12	9.1275e-11
22713	chr8	98270680	98273729	3050	1.17604	1.10371e-12	9.24037e-11
25653	chr10	1092950	1096879	3930	-0.697742	1.11501e-12	9.30699e-11
5800	chr2	43191600	43197079	5480	0.866504	1.13065e-12	9.40315e-11
3475	chr1	173835250	173839129	3880	-0.646411	1.13328e-12	9.40315e-11
48218	chr22	42083350	42086249	2900	-0.649389	1.14265e-12	9.45279e-11
3263	chr1	161358130	161361379	3250	-0.759612	1.16092e-12	9.57557e-11
43878	chr19	11645080	11647999	2920	-0.815186	1.16812e-12	9.6065e-11
2866	chr1	145825680	145827829	2150	-0.788263	1.19008e-12	9.75832e-11
3802	chr1	201534080	201538449	4370	0.864262	1.21739e-12	9.95296e-11
45580	chr20	17613580	17620079	6500	1.19739	1.22825e-12	1.00124e-10
1176	chr1	32109100	32112049	2950	-0.730408	1.2802e-12	1.04054e-10
31651	chr12	48590680	48593849	3170	-0.727118	1.2971e-12	1.05122e-10
35044	chr14	70176950	70187649	10700	0.542731	1.33057e-12	1.07522e-10
10802	chr3	127627930	127631179	3250	0.956493	1.47535e-12	1.18672e-10
9563	chr3	42844350	42847829	3480	-0.661481	1.47707e-12	1.18672e-10
33270	chr13	24269000	24271349	2350	1.08837	1.55905e-12	1.24899e-10
43910	chr19	12604880	12607679	2800	-0.706496	1.56597e-12	1.25051e-10
27117	chr10	80933430	80946779	13350	0.48514	1.56992e-12	1.25051e-10
19799	chr7	45149880	45152899	3020	-0.706152	1.63145e-12	1.29582e-10
30046	chr11	78284580	78287379	2800	-0.709733	1.67387e-12	1.32574e-10
47181	chr21	47312350	47315179	2830	1.31455	1.68086e-12	1.3275e-10
30714	chr11	126137380	126140399	3020	-0.66658	1.73169e-12	1.36378e-10
13513	chr4	164086400	164089399	3000	-0.698405	1.75555e-12	1.37868e-10
13664	chr4	184904180	184911549	7370	-0.748738	1.82403e-12	1.42843e-10
29826	chr11	71821280	71825249	3970	-0.696192	1.8621e-12	1.45416e-10
16883	chr6	26183230	26185249	2020	-0.938948	1.90007e-12	1.47789e-10
9911	chr3	53116850	53120229	3380	-0.804443	1.90309e-12	1.47789e-10
1744	chr1	53555800	53561229	5430	0.815514	1.94138e-12	1.50344e-10
2542	chr1	110879550	110885679	6130	-0.619474	1.9576e-12	1.5118e-10
8299	chr2	220141750	220146799	5050	-0.596616	2.18034e-12	1.67916e-10
7959	chr2	198362550	198366549	4000	-0.807583	2.20085e-12	1.69029e-10
15093	chr5	132200730	132204929	4200	-0.590672	2.22457e-12	1.70381e-10
19793	chr7	44885030	44889349	4320	-0.641679	2.23987e-12	1.71083e-10
1648	chr1	47071900	47074599	2700	1.10145	2.27939e-12	1.73626e-10
32363	chr12	98812600	98815449	2850	1.09948	2.30815e-12	1.75338e-10
3414	chr1	168695330	168699049	3720	0.964086	2.34604e-12	1.77731e-10
10713	chr3	124833400	124837179	3780	0.739427	2.42536e-12	1.83243e-10
28909	chr11	27254480	27256549	2070	1.34255	2.4955e-12	1.88032e-10
22014	chr8	29937550	29941449	3900	-0.70077	2.50993e-12	1.8818e-10
6142	chr2	61762650	61767349	4700	-0.661622	2.51096e-12	1.8818e-10
11059	chr3	139740180	139744249	4070	1.13655	2.58914e-12	1.93519e-10
5833	chr2	43503180	43506799	3620	0.947623	2.63267e-12	1.95889e-10
14763	chr5	89823980	89826979	3000	-0.632549	2.6349e-12	1.95889e-10
34801	chr14	60713100	60716629	3530	-0.728671	2.7051e-12	2.00573e-10
23839	chr9	35602700	35605979	3280	-0.744768	2.7662e-12	2.0456e-10
34198	chr13	111362900	111369549	6650	-0.67295	2.80158e-12	2.06627e-10
36839	chr15	71091100	71095629	4530	1.0085	2.86789e-12	2.10961e-10
5113	chr2	10536230	10538949	2720	0.935057	2.95329e-12	2.1667e-10
48211	chr22	42015530	42018749	3220	-0.706112	2.98512e-12	2.18431e-10
26451	chr10	44692350	44695749	3400	0.974624	2.99431e-12	2.1853e-10
20197	chr7	74265100	74269199	4100	-0.628607	3.06207e-12	2.22892e-10
20349	chr7	87504230	87507279	3050	-0.731019	3.19774e-12	2.32161e-10
29545	chr11	64888250	64891149	2900	-0.677524	3.21751e-12	2.32989e-10
7990	chr2	201751650	201755879	4230	-0.563884	3.32365e-12	2.40052e-10
24768	chr9	116386230	116390799	4570	0.758419	3.43761e-12	2.47641e-10
41536	chr17	61848700	61853079	4380	-0.559812	3.47786e-12	2.49895e-10
16414	chr6	4017500	4019979	2480	-0.735336	3.5198e-12	2.52259e-10
7987	chr2	201726250	201731479	5230	-0.607823	3.6191e-12	2.58418e-10
47806	chr22	32010430	32014929	4500	1.22166	3.62429e-12	2.58418e-10
40505	chr17	21248900	21253599	4700	0.811178	3.8113e-12	2.71059e-10
4897	chr1	249166450	249169799	3350	-0.684347	3.88467e-12	2.75575e-10
225	chr1	6554080	6563879	9800	0.650225	3.94503e-12	2.78746e-10
44012	chr19	14626200	14630929	4730	-0.597156	3.94938e-12	2.78746e-10
46014	chr20	36752980	36767699	14720	0.441602	4.1511e-12	2.92244e-10
15883	chr5	159782980	159786629	3650	0.90332	4.40499e-12	3.09337e-10
46026	chr20	36886730	36889949	3220	1.27652	4.4365e-12	3.10767e-10
41292	chr17	48911230	48914979	3750	0.983007	4.50614e-12	3.14854e-10
5790	chr2	43070930	43077229	6300	1.0243	4.53873e-12	3.16338e-10
30272	chr11	108091950	108095249	3300	-0.686464	4.57179e-12	3.17847e-10
30041	chr11	78029150	78032149	3000	0.985187	4.61539e-12	3.20081e-10
34970	chr14	69049700	69058649	8950	0.747116	4.63152e-12	3.20403e-10
29436	chr11	62571400	62575049	3650	-0.701593	4.87544e-12	3.36441e-10
14826	chr5	98107800	98111429	3630	-0.76388	4.89497e-12	3.36955e-10
24542	chr9	102579880	102587779	7900	-0.788732	5.06429e-12	3.47752e-10
17197	chr6	34723450	34730929	7480	-0.614235	5.08963e-12	3.48633e-10
5021	chr2	8626850	8630029	3180	1.11869	5.21256e-12	3.56179e-10
22688	chr8	97246400	97249349	2950	-0.742653	5.29511e-12	3.60935e-10
40783	chr17	36979950	36983379	3430	-0.638045	5.50443e-12	3.74288e-10
28038	chr10	124232850	124236849	4000	0.749154	5.54131e-12	3.75879e-10
22110	chr8	38286030	38288849	2820	0.812464	5.72238e-12	3.87219e-10
42434	chr18	9992230	9994429	2200	1.07239	5.77758e-12	3.89198e-10
14751	chr5	87563250	87566199	2950	-0.662617	5.77954e-12	3.89198e-10
18953	chr6	169038230	169041779	3550	0.942835	5.98205e-12	4.01864e-10
40489	chr17	21029330	21031649	2320	-0.711126	6.11175e-12	4.0959e-10
36523	chr15	63201650	63205049	3400	1.02835	6.24945e-12	4.17814e-10
12758	chr4	83674250	83676879	2630	1.06127	6.33583e-12	4.21184e-10
40725	chr17	33913380	33915779	2400	-0.812462	6.33707e-12	4.21184e-10
11455	chr3	177474450	177476949	2500	0.996725	6.34518e-12	4.21184e-10
5846	chr2	43821600	43824649	3050	-0.660134	6.38375e-12	4.22738e-10
42	chr1	1292050	1297979	5930	0.947953	6.50982e-12	4.30065e-10
45742	chr20	24971980	24974779	2800	-0.633448	6.62148e-12	4.36283e-10
20684	chr7	107530530	107533249	2720	-0.708057	6.63524e-12	4.36283e-10
27074	chr10	80191730	80197749	6020	1.08121	6.66628e-12	4.37292e-10
4723	chr1	236225430	236233199	7770	-0.585261	6.75328e-12	4.41959e-10
19041	chr7	581530	584149	2620	1.27772	6.87064e-12	4.48587e-10
46146	chr20	43984050	43993579	9530	-0.580094	6.99466e-12	4.55617e-10
28726	chr11	13360230	13363599	3370	1.00099	7.16405e-12	4.65563e-10
11579	chr3	184999650	185002079	2430	-0.99114	7.1868e-12	4.65956e-10
24516	chr9	101686530	101688649	2120	0.976811	7.24278e-12	4.68495e-10
34457	chr14	24910400	24912829	2430	-0.752255	7.4049e-12	4.77225e-10
22681	chr8	96280150	96283399	3250	-0.619888	7.41197e-12	4.77225e-10
24240	chr9	91923600	91926829	3230	-0.829952	7.46007e-12	4.79215e-10
33387	chr13	31190350	31193429	3080	-0.57063	7.54691e-12	4.83679e-10
29499	chr11	64070830	64075329	4500	-0.555439	7.63194e-12	4.88007e-10
33685	chr13	45913800	45917079	3280	-0.612329	7.65319e-12	4.88245e-10
6424	chr2	74153100	74155279	2180	-0.720186	7.69893e-12	4.90042e-10
33986	chr13	97919580	97922699	3120	0.878574	7.74453e-12	4.91822e-10
20463	chr7	99096080	99099349	3270	-0.569317	7.77552e-12	4.92667e-10
11103	chr3	141593750	141597379	3630	-0.63946	7.84641e-12	4.96032e-10
1944	chr1	61387150	61391349	4200	0.781858	8.04037e-12	5.06794e-10
33403	chr13	31734350	31737649	3300	-0.75341	8.06094e-12	5.06794e-10
20711	chr7	112089130	112095449	6320	-0.589265	8.07261e-12	5.06794e-10
5804	chr2	43253200	43257629	4430	0.808001	8.08936e-12	5.06794e-10
11563	chr3	184408350	184411099	2750	1.20086	8.177e-12	5.10595e-10
3262	chr1	161283050	161285549	2500	-0.626294	8.18667e-12	5.10595e-10
10160	chr3	66481050	66484649	3600	0.770665	8.43737e-12	5.25057e-10
32173	chr12	82751050	82753629	2580	-0.68879	8.54427e-12	5.30525e-10
16886	chr6	26203550	26207849	4300	-1.00468	8.72626e-12	5.40621e-10
11939	chr4	1027100	1029329	2230	1.46325	8.81965e-12	5.45195e-10
48171	chr22	41251300	41254379	3080	-0.627799	8.88094e-12	5.47675e-10
19423	chr7	23569900	23573029	3130	-0.561518	8.89906e-12	5.47675e-10
7266	chr2	128282700	128285649	2950	-0.702707	9.22163e-12	5.64355e-10
29427	chr11	62454600	62459579	4980	0.840936	9.2272e-12	5.64355e-10
8603	chr2	238175930	238179929	4000	1.27041	9.23082e-12	5.64355e-10
24298	chr9	94876350	94879299	2950	-0.663105	9.6498e-12	5.8868e-10
23735	chr9	32549550	32553699	4150	-0.61049	9.76561e-12	5.94444e-10
42840	chr18	42321630	42325099	3470	0.885184	9.79928e-12	5.95194e-10
11486	chr3	179321450	179323949	2500	-0.650108	9.9443e-12	6.02689e-10
32294	chr12	94852200	94855049	2850	-0.643568	9.98067e-12	6.029e-10
41363	chr17	55528200	55534649	6450	0.73913	9.99103e-12	6.029e-10
41166	chr17	46003700	46007929	4230	0.98829	1.01238e-11	6.09593e-10
18911	chr6	168067780	168071999	4220	0.77031	1.02663e-11	6.16839e-10
30600	chr11	121541150	121544779	3630	1.11573	1.05402e-11	6.31933e-10
18747	chr6	160181530	160184899	3370	-0.644282	1.0579e-11	6.32899e-10
7068	chr2	112236900	112239499	2600	1.11852	1.07185e-11	6.39875e-10
20289	chr7	76755350	76757399	2050	1.28395	1.10028e-11	6.55443e-10
32134	chr12	72147330	72153429	6100	-0.704351	1.11782e-11	6.64472e-10
26797	chr10	71655400	71657479	2080	1.42279	1.15836e-11	6.87106e-10
26530	chr10	48572600	48574779	2180	1.16826	1.16609e-11	6.90224e-10
5973	chr2	47309650	47317549	7900	0.602036	1.17519e-11	6.94134e-10
4029	chr1	205909280	205911979	2700	0.903777	1.17858e-11	6.94667e-10
19550	chr7	30889000	30893699	4700	0.962758	1.21006e-11	7.11712e-10
23881	chr9	37463680	37467579	3900	-0.802635	1.22025e-11	7.16194e-10
20368	chr7	91762250	91765449	3200	-0.688608	1.23195e-11	7.21026e-10
16887	chr6	26214680	26219329	4650	-0.985474	1.23365e-11	7.21026e-10
16985	chr6	30027630	30030599	2970	-0.62771	1.27929e-11	7.46137e-10
39317	chr16	77223180	77225949	2770	-0.626073	1.3091e-11	7.61926e-10
25917	chr10	13745400	13751229	5830	0.594495	1.32988e-11	7.72408e-10
23277	chr8	141473200	141477299	4100	-0.69455	1.36493e-11	7.91122e-10
48385	chr22	45847600	45849679	2080	1.24287	1.4026e-11	8.11265e-10
2763	chr1	119681680	119684879	3200	-0.72407	1.4561e-11	8.40466e-10
7812	chr2	179341950	179346779	4830	-0.705404	1.4906e-11	8.5831e-10
25127	chr9	131003800	131009099	5300	0.970749	1.49317e-11	8.5831e-10
16893	chr6	26283800	26287149	3350	-0.936732	1.49694e-11	8.5871e-10
24973	chr9	127701850	127705379	3530	-0.583825	1.52073e-11	8.70565e-10
48370	chr22	45605600	45610649	5050	1.1071	1.57026e-11	8.97074e-10
12674	chr4	76648350	76652529	4180	-0.764014	1.60078e-11	9.12643e-10
15726	chr5	153748350	153752229	3880	0.798634	1.64562e-11	9.36292e-10
22085	chr8	37639230	37646699	7470	0.751116	1.73221e-11	9.83552e-10
24763	chr9	116281580	116291099	9520	0.418207	1.73826e-11	9.84431e-10
10600	chr3	122100780	122104399	3620	-0.656389	1.74083e-11	9.84431e-10
28570	chr11	9775850	9778449	2600	0.895204	1.75374e-11	9.89729e-10
17067	chr6	31780930	31799499	18570	-0.521389	1.77616e-11	1.00036e-09
31657	chr12	49109100	49112129	3030	-0.594654	1.80557e-11	1.01487e-09
34983	chr14	69170480	69174399	3920	0.857287	1.82488e-11	1.02366e-09
2849	chr1	145469150	145478549	9400	-0.41775	1.84832e-11	1.03473e-09
21059	chr7	139023800	139028249	4450	-0.771664	1.86535e-11	1.04217e-09
9451	chr3	38204680	38208849	4170	-0.572838	1.93445e-11	1.07844e-09
37767	chr16	283250	286579	3330	-0.614658	1.93802e-11	1.07844e-09
2157	chr1	78443200	78446679	3480	-0.625213	1.99285e-11	1.10675e-09
21828	chr8	22765830	22771929	6100	0.650821	1.99972e-11	1.10836e-09
23811	chr9	34663880	34667929	4050	-0.578395	2.05192e-11	1.13503e-09
24315	chr9	95376150	95381629	5480	0.933814	2.07176e-11	1.14374e-09
38302	chr16	18811400	18814499	3100	-0.611289	2.10304e-11	1.15871e-09
16853	chr6	24718750	24723749	5000	-0.53207	2.14501e-11	1.1789e-09
30274	chr11	108336300	108339849	3550	-0.626164	2.14815e-11	1.1789e-09
24384	chr9	97487650	97490279	2630	-0.76025	2.15689e-11	1.18137e-09
36761	chr15	68876180	68880049	3870	0.967745	2.16702e-11	1.18459e-09
6727	chr2	97548380	97558979	10600	0.857787	2.23007e-11	1.21668e-09
2971	chr1	150600900	150604349	3450	-0.72474	2.34317e-11	1.27589e-09
3996	chr1	205412350	205415949	3600	1.06976	2.35788e-11	1.28139e-09
37117	chr15	78439030	78443549	4520	-0.597673	2.39096e-11	1.29684e-09
11863	chr3	196224750	196232399	7650	-0.482196	2.39932e-11	1.29885e-09
32414	chr12	104678830	104684479	5650	-0.563904	2.40767e-11	1.30084e-09
43243	chr18	71813680	71817149	3470	-0.644726	2.45542e-11	1.32408e-09
19864	chr7	47556730	47560279	3550	1.02077	2.4653e-11	1.32684e-09
47245	chr22	18109550	18112929	3380	-0.594473	2.4804e-11	1.33218e-09
20478	chr7	99646050	99649129	3080	-0.578577	2.48478e-11	1.33218e-09
486	chr1	12170850	12173949	3100	1.2607	2.49519e-11	1.33519e-09
406	chr1	10268980	10272949	3970	-0.680129	2.5047e-11	1.33771e-09
16951	chr6	28302000	28304979	2980	-0.76661	2.57782e-11	1.37413e-09
7865	chr2	187349580	187352379	2800	-0.658914	2.60005e-11	1.38334e-09
28820	chr11	18654450	18657229	2780	-0.61152	2.73405e-11	1.45186e-09
24241	chr9	91932050	91935629	3580	-0.824567	2.7459e-11	1.45538e-09
39756	chr17	75980	78049	2070	1.21476	2.75993e-11	1.46004e-09
31489	chr12	31475780	31480649	4870	-0.698189	2.78302e-11	1.46947e-09
34410	chr14	23788880	23792249	3370	-0.621121	2.79501e-11	1.47301e-09
30429	chr11	115754800	115757649	2850	1.11014	2.85959e-11	1.5042e-09
17879	chr6	90527450	90530949	3500	-0.648111	2.89034e-11	1.51751e-09
43573	chr19	4341200	4344379	3180	-0.596812	2.90801e-11	1.5236e-09
31224	chr12	10764950	10767379	2430	-0.754323	2.91288e-11	1.5236e-09
19450	chr7	25791700	25794929	3230	1.31929	2.926e-11	1.5276e-09
9382	chr3	37033130	37037979	4850	-0.567214	3.02721e-11	1.57749e-09
36778	chr15	69098250	69102279	4030	0.649927	3.03379e-11	1.57797e-09
26555	chr10	50010800	50015749	4950	0.894078	3.04413e-11	1.5804e-09
2477	chr1	109795450	109799299	3850	0.776238	3.09694e-11	1.60475e-09
19811	chr7	45806800	45810099	3300	-0.571814	3.10254e-11	1.60475e-09
15132	chr5	133705100	133708699	3600	-0.53781	3.13059e-11	1.61625e-09
28186	chr10	134020230	134023729	3500	-0.762205	3.16939e-11	1.6317e-09
14810	chr5	96034530	96040029	5500	-0.625484	3.17222e-11	1.6317e-09
25020	chr9	129750100	129753949	3850	0.860038	3.20661e-11	1.64635e-09
25443	chr9	137392050	137396229	4180	1.04593	3.25811e-11	1.66972e-09
26232	chr10	31098850	31102729	3880	0.78047	3.27095e-11	1.67323e-09
4329	chr1	223287030	223289949	2920	0.919245	3.33855e-11	1.70375e-09
18748	chr6	160208750	160213149	4400	-0.689943	3.34285e-11	1.70375e-09
12765	chr4	83810180	83813699	3520	-0.590382	3.36105e-11	1.7099e-09
9370	chr3	33757980	33761349	3370	-0.708376	3.36781e-11	1.71022e-09
37762	chr16	133280	136549	3270	0.86826	3.40922e-11	1.72811e-09
16033	chr5	172000150	172005329	5180	0.69629	3.55052e-11	1.79646e-09
44989	chr19	49953650	49958049	4400	-0.625074	3.59091e-11	1.81361e-09
41977	chr17	75858830	75862879	4050	0.831242	3.62872e-11	1.82939e-09
26270	chr10	32034080	32036299	2220	1.18927	3.65366e-11	1.83863e-09
39754	chr17	48550	52399	3850	0.89981	3.70308e-11	1.86015e-09
41508	chr17	60703630	60709979	6350	1.10088	3.71481e-11	1.86269e-09
40684	chr17	30675680	30678599	2920	-0.625143	3.88362e-11	1.94383e-09
46939	chr21	40380680	40384779	4100	0.928434	3.90909e-11	1.95307e-09
36660	chr15	66935430	66943449	8020	0.665063	3.91988e-11	1.95496e-09
9881	chr3	52310700	52314299	3600	-0.570304	3.94942e-11	1.96618e-09
18699	chr6	158434850	158444479	9630	0.815764	3.96376e-11	1.9698e-09
10606	chr3	122511400	122515529	4130	-0.53223	3.97823e-11	1.97347e-09
26474	chr10	45427430	45432279	4850	0.718747	4.03079e-11	1.99458e-09
27695	chr10	105725330	105729979	4650	-0.652739	4.03508e-11	1.99458e-09
12648	chr4	73934000	73936849	2850	-0.744374	4.18083e-11	2.06001e-09
44931	chr19	49120780	49124249	3470	-0.534939	4.18223e-11	2.06001e-09
8	chr1	712650	715999	3350	-0.59728	4.25311e-11	2.09122e-09
16961	chr6	28862150	28865849	3700	-0.619505	4.30807e-11	2.11452e-09
22736	chr8	99176500	99180879	4380	0.820752	4.33542e-11	2.12408e-09
24508	chr9	101634750	101638429	3680	0.954508	4.34278e-11	2.12408e-09
26873	chr10	73466700	73469649	2950	1.00967	4.45263e-11	2.17399e-09
43496	chr19	2943280	2946549	3270	-0.668967	4.47034e-11	2.17882e-09
17699	chr6	56406350	56408649	2300	-0.82669	4.49834e-11	2.18864e-09
29519	chr11	64544130	64548299	4170	-0.752644	4.53909e-11	2.20462e-09
2927	chr1	149782680	149786149	3470	-0.769391	4.65623e-11	2.25367e-09
2498	chr1	110089730	110092549	2820	-0.629722	4.65625e-11	2.25367e-09
36672	chr15	67035730	67047379	11650	0.50067	5.07677e-11	2.44983e-09
2466	chr1	109504400	109507199	2800	-0.791715	5.07911e-11	2.44983e-09
34331	chr14	20799930	20802379	2450	-0.80713	5.09987e-11	2.4556e-09
38591	chr16	30387500	30391949	4450	-0.513678	5.12058e-11	2.46132e-09
25072	chr9	130306450	130311379	4930	0.919217	5.22584e-11	2.50759e-09
5806	chr2	43269650	43274799	5150	0.6858	5.29789e-11	2.5378e-09
41844	chr17	73661950	73664749	2800	-0.715459	5.35465e-11	2.56059e-09
42958	chr18	46349930	46357079	7150	0.939775	5.39536e-11	2.57564e-09
29737	chr11	68892550	68895699	3150	0.944805	5.46957e-11	2.6066e-09
10406	chr3	101393730	101396729	3000	-0.689228	5.59705e-11	2.6628e-09
22853	chr8	103874050	103877999	3950	-0.652254	5.60774e-11	2.66334e-09
26700	chr10	64548030	64551499	3470	0.880708	5.67983e-11	2.68928e-09
46803	chr21	35286780	35289599	2820	-0.663421	5.68164e-11	2.68928e-09
12767	chr4	83930650	83935449	4800	-0.665747	5.79264e-11	2.73717e-09
6603	chr2	87871180	87875749	4570	0.893339	5.8526e-11	2.76082e-09
20663	chr7	105923580	105927149	3570	-0.673537	5.87986e-11	2.769e-09
41758	chr17	71757750	71760499	2750	1.0953	5.93354e-11	2.78956e-09
41456	chr17	57783400	57786449	3050	-0.631495	5.9634e-11	2.79134e-09
30069	chr11	82865830	82870049	4220	-0.481689	5.9786e-11	2.79134e-09
19870	chr7	47659350	47663049	3700	0.890025	5.97989e-11	2.79134e-09
19552	chr7	30911800	30915029	3230	0.986855	5.98107e-11	2.79134e-09
21268	chr7	151213430	151219099	5670	-0.648587	5.98737e-11	2.79134e-09
11231	chr3	155570700	155574199	3500	-0.589968	6.01541e-11	2.79972e-09
23995	chr9	69261250	69263899	2650	-0.625479	6.02668e-11	2.8003e-09
9507	chr3	40810450	40813649	3200	0.923987	6.09095e-11	2.82545e-09
16921	chr6	27439300	27442449	3150	-0.718227	6.16784e-11	2.85345e-09
37845	chr16	1754130	1759879	5750	-0.483302	6.17179e-11	2.85345e-09
43763	chr19	8589200	8592849	3650	-0.621239	6.18783e-11	2.85613e-09
613	chr1	16436780	16440849	4070	1.01751	6.29294e-11	2.89985e-09
18412	chr6	143379450	143383449	4000	-0.623508	6.45849e-11	2.96778e-09
3174	chr1	156181900	156184599	2700	-0.62089	6.46166e-11	2.96778e-09
15306	chr5	139247530	139250629	3100	1.07132	6.52023e-11	2.98629e-09
25816	chr10	7592650	7595229	2580	1.02252	6.52337e-11	2.98629e-09
35133	chr14	74483780	74487449	3670	-0.740458	6.55901e-11	2.99768e-09
9095	chr3	14689500	14694649	5150	-0.668403	6.58376e-11	3.00407e-09
25222	chr9	132473080	132476549	3470	1.1919	6.60092e-11	3.00698e-09
14598	chr5	72859930	72862829	2900	-0.64927	6.79104e-11	3.08854e-09
43877	chr19	11638580	11641729	3150	-0.836774	6.93741e-11	3.14997e-09
37191	chr15	81472830	81476799	3970	1.03415	6.95171e-11	3.15133e-09
1216	chr1	33159350	33162129	2780	0.82727	6.9989e-11	3.16757e-09
45035	chr19	50876830	50881049	4220	-0.630132	7.12989e-11	3.22162e-09
24918	chr9	125024030	125028299	4270	-0.646051	7.18808e-11	3.24266e-09
17272	chr6	36560300	36564849	4550	-0.649467	7.2241e-11	3.25364e-09
14281	chr5	43119600	43123129	3530	-0.740032	7.29654e-11	3.28097e-09
22887	chr8	109454280	109457199	2920	-0.81645	7.33722e-11	3.29395e-09
23730	chr9	27569630	27575299	5670	-0.624643	7.42078e-11	3.32611e-09
25758	chr10	5660050	5662549	2500	1.23125	7.47758e-11	3.34619e-09
26230	chr10	31069200	31076279	7080	0.626949	7.5527e-11	3.37332e-09
29146	chr11	45867000	45872699	5700	-0.550213	7.56242e-11	3.37332e-09
17069	chr6	31829130	31833149	4020	-0.626555	7.60916e-11	3.38875e-09
34981	chr14	69155830	69159199	3370	1.08198	7.62632e-11	3.39098e-09
41509	chr17	60724480	60728549	4070	0.910724	7.66651e-11	3.40214e-09
2502	chr1	110165680	110168099	2420	1.11073	7.67584e-11	3.40214e-09
5306	chr2	23785130	23790249	5120	0.921793	7.692e-11	3.40389e-09
10693	chr3	124560700	124565499	4800	0.709761	7.75711e-11	3.42727e-09
31956	chr12	57534550	57537949	3400	0.995372	7.80206e-11	3.44167e-09
34311	chr13	114796100	114802099	6000	0.938434	7.86781e-11	3.46011e-09
39024	chr16	66298030	66302099	4070	0.870097	7.86869e-11	3.46011e-09
8255	chr2	218858530	218862199	3670	0.863855	8.00062e-11	3.51259e-09
29778	chr11	69793150	69796899	3750	1.13929	8.02374e-11	3.5172e-09
35589	chr14	100759580	100766299	6720	0.686199	8.06069e-11	3.52785e-09
39597	chr16	87413050	87422579	9530	-0.466785	8.0862e-11	3.53347e-09
24381	chr9	97135330	97138629	3300	-0.664356	8.31765e-11	3.62512e-09
40454	chr17	19313580	19316199	2620	1.28375	8.32196e-11	3.62512e-09
45169	chr19	55917400	55921229	3830	-0.552854	8.43973e-11	3.67069e-09
13689	chr4	185392900	185398449	5550	-0.514298	8.51357e-11	3.69222e-09
27700	chr10	105879880	105883199	3320	-0.66333	8.52757e-11	3.69222e-09
47636	chr22	27506230	27510049	3820	1.03925	8.52895e-11	3.69222e-09
27097	chr10	80659150	80661429	2280	1.09235	8.7954e-11	3.80166e-09
37098	chr15	78167280	78172549	5270	0.993831	8.84763e-11	3.81831e-09
11135	chr3	145877400	145880699	3300	-0.700862	8.88899e-11	3.82111e-09
4142	chr1	210464580	210470979	6400	0.829201	8.89445e-11	3.82111e-09
30099	chr11	86170150	86172479	2330	0.831191	8.89522e-11	3.82111e-09
8869	chr3	8663100	8666099	3000	0.920549	8.93549e-11	3.8325e-09
44465	chr19	36703830	36707379	3550	-0.596427	9.09936e-11	3.89679e-09
26979	chr10	75715430	75719799	4370	0.744909	9.12001e-11	3.89964e-09
5865	chr2	45837100	45839249	2150	-0.684442	9.23164e-11	3.94133e-09
36919	chr15	72763930	72768749	4820	-0.526638	9.36168e-11	3.99074e-09
3264	chr1	161367980	161371449	3470	-0.542465	9.4774e-11	4.0339e-09
8963	chr3	11582850	11588129	5280	0.815733	9.6628e-11	4.10654e-09
44601	chr19	41281850	41285749	3900	-0.575199	9.71204e-11	4.12119e-09
39438	chr16	83985300	83998629	13330	-0.529577	9.77322e-11	4.14085e-09
4716	chr1	236079750	236084699	4950	0.789228	9.90198e-11	4.18904e-09
16879	chr6	26103300	26105499	2200	-1.05682	9.98321e-11	4.217e-09
5536	chr2	30655700	30659349	3650	0.935809	1.01697e-10	4.28926e-09
19995	chr7	56172880	56175599	2720	-0.67157	1.01857e-10	4.28952e-09
17861	chr6	89787730	89793799	6070	-0.518235	1.03257e-10	4.34194e-09
34927	chr14	68085230	68088199	2970	-0.773508	1.04909e-10	4.40477e-09
17983	chr6	109017950	109022229	4280	0.730609	1.0725e-10	4.49627e-09
39301	chr16	75465880	75469299	3420	-0.621161	1.07625e-10	4.50523e-09
11918	chr4	328880	333479	4600	-0.594283	1.0818e-10	4.52168e-09
26252	chr10	31437830	31439879	2050	0.992701	1.09424e-10	4.56683e-09
7252	chr2	127475850	127479279	3430	0.723664	1.10627e-10	4.61011e-09
46024	chr20	36880150	36882499	2350	1.14232	1.13651e-10	4.72909e-09
6528	chr2	85984930	85989849	4920	0.90433	1.18672e-10	4.92814e-09
24509	chr9	101640800	101643749	2950	0.982089	1.18789e-10	4.92814e-09
31698	chr12	49973730	49979949	6220	0.754118	1.20845e-10	5.006e-09
18299	chr6	136609250	136612699	3450	-0.602967	1.21339e-10	5.01718e-09
9970	chr3	57018800	57022679	3880	0.916982	1.21585e-10	5.01718e-09
9441	chr3	38007550	38012079	4530	0.829974	1.21655e-10	5.01718e-09
28974	chr11	34175750	34180179	4430	1.07	1.21949e-10	5.0219e-09
29307	chr11	59434980	59438179	3200	-0.636251	1.23196e-10	5.06576e-09
2462	chr1	109288100	109290979	2880	-0.613386	1.24482e-10	5.11108e-09
8860	chr3	8594280	8598199	3920	0.947005	1.27593e-10	5.23113e-09
36767	chr15	68923500	68928699	5200	0.690582	1.29734e-10	5.3111e-09
46817	chr21	35715100	35719349	4250	0.926484	1.31204e-10	5.36339e-09
35131	chr14	74352100	74355029	2930	-0.573475	1.31511e-10	5.36807e-09
34979	chr14	69134380	69139499	5120	0.645403	1.32576e-10	5.40363e-09
5119	chr2	10829030	10831499	2470	-0.586826	1.34673e-10	5.48108e-09
32371	chr12	98986730	98989029	2300	-0.552977	1.37902e-10	5.60433e-09
9500	chr3	40493280	40496229	2950	-0.746496	1.38432e-10	5.61767e-09
2733	chr1	117420100	117423349	3250	0.835265	1.41029e-10	5.70705e-09
765	chr1	20833330	20835699	2370	-0.620413	1.41044e-10	5.70705e-09
16046	chr5	172112050	172125599	13550	0.521561	1.41388e-10	5.71269e-09
48222	chr22	42227380	42231149	3770	-0.569356	1.4304e-10	5.77107e-09
17074	chr6	31938280	31941679	3400	-0.623911	1.44284e-10	5.81284e-09
43469	chr19	2539430	2551649	12220	-0.56517	1.50763e-10	6.06512e-09
9865	chr3	52121430	52126479	5050	0.896905	1.51202e-10	6.074e-09
33265	chr13	24202600	24205449	2850	0.940411	1.5262e-10	6.12217e-09
8088	chr2	207022650	207025999	3350	-0.536118	1.53811e-10	6.16105e-09
37478	chr15	91536650	91539299	2650	-0.809071	1.54275e-10	6.17077e-09
23736	chr9	32571880	32574149	2270	-0.760552	1.54656e-10	6.17716e-09
8868	chr3	8648180	8650699	2520	0.929964	1.55927e-10	6.219e-09
47804	chr22	31997600	32000329	2730	1.04289	1.57051e-10	6.24927e-09
4093	chr1	208249800	208251829	2030	1.19013	1.57134e-10	6.24927e-09
15547	chr5	148204680	148207999	3320	-0.685365	1.57445e-10	6.2527e-09
10403	chr3	101279430	101281899	2470	-0.603452	1.59969e-10	6.3385e-09
7875	chr2	190304530	190307499	2970	-0.656034	1.6006e-10	6.3385e-09
6335	chr2	70367250	70371699	4450	-0.562123	1.63446e-10	6.46342e-09
28815	chr11	18414530	18419149	4620	-0.516851	1.6412e-10	6.48089e-09
8036	chr2	203128500	203132029	3530	-0.546046	1.65328e-10	6.51662e-09
5430	chr2	27543430	27547899	4470	-0.670271	1.65492e-10	6.51662e-09
29228	chr11	47662750	47665749	3000	-0.690128	1.66855e-10	6.56101e-09
7193	chr2	121521080	121525199	4120	0.885122	1.69859e-10	6.66971e-09
39905	chr17	2292650	2306929	14280	-0.495031	1.70297e-10	6.67751e-09
18881	chr6	166873300	166877399	4100	0.939318	1.72555e-10	6.75637e-09
48194	chr22	41774930	41780199	5270	-0.681558	1.72793e-10	6.75637e-09
20056	chr7	66307900	66311899	4000	-0.567949	1.73078e-10	6.75804e-09
5084	chr2	9892100	9894629	2530	0.885838	1.74941e-10	6.82122e-09
24518	chr9	101719180	101732149	12970	0.804429	1.76612e-10	6.87677e-09
37553	chr15	93446200	93448849	2650	-0.855484	1.7902e-10	6.96079e-09
4707	chr1	235290350	235293679	3330	-0.650974	1.82232e-10	7.07495e-09
17477	chr6	43137200	43143399	6200	-0.667804	1.82463e-10	7.07495e-09
15050	chr5	130969530	130972649	3120	-0.719818	1.83535e-10	7.10663e-09
43314	chr18	77243830	77246079	2250	1.25165	1.84988e-10	7.15297e-09
12720	chr4	78738380	78742779	4400	-0.57686	1.86154e-10	7.18806e-09
25562	chr9	139854530	139859099	4570	1.05537	1.86571e-10	7.19423e-09
11734	chr3	193310130	193312529	2400	-0.669393	1.86928e-10	7.198e-09
13035	chr4	114899400	114902079	2680	0.873856	1.87702e-10	7.21786e-09
44494	chr19	37824050	37827029	2980	-0.602699	1.90042e-10	7.29778e-09
26887	chr10	73618750	73621999	3250	-0.628628	1.91021e-10	7.32526e-09
44683	chr19	44171130	44175399	4270	-0.545162	1.98781e-10	7.61238e-09
45444	chr20	5099250	5102049	2800	-0.70394	2.01328e-10	7.69251e-09
29387	chr11	61675150	61680029	4880	0.942752	2.01425e-10	7.69251e-09
26386	chr10	38145100	38148199	3100	-0.709984	2.0191e-10	7.70047e-09
28977	chr11	34212900	34215999	3100	0.956603	2.06732e-10	7.87361e-09
660	chr1	17292530	17295249	2720	0.959503	2.09182e-10	7.95604e-09
2995	chr1	151370830	151373529	2700	-0.703068	2.10949e-10	8.01232e-09
36756	chr15	68809080	68811949	2870	1.07422	2.13057e-10	8.08138e-09
5650	chr2	37457800	37460799	3000	-0.570882	2.15709e-10	8.17087e-09
43317	chr18	77326400	77329129	2730	0.862832	2.17577e-10	8.23043e-09
14865	chr5	108744030	108747549	3520	-0.548286	2.23263e-10	8.43394e-09
43943	chr19	13153380	13156999	3620	0.672013	2.23688e-10	8.43394e-09
34394	chr14	23475100	23477549	2450	-0.631535	2.23864e-10	8.43394e-09
24758	chr9	116235730	116241099	5370	0.624279	2.28767e-10	8.607e-09
22857	chr8	103925300	103932849	7550	0.834165	2.29291e-10	8.6151e-09
4193	chr1	212779250	212784179	4930	-0.769485	2.30414e-10	8.64565e-09
4472	chr1	228295550	228298849	3300	-0.62697	2.30883e-10	8.65161e-09
43658	chr19	5934700	5937049	2350	0.923854	2.31356e-10	8.65767e-09
2041	chr1	65466200	65469599	3400	-0.694975	2.32649e-10	8.69438e-09
44918	chr19	48865700	48868249	2550	-0.630295	2.37657e-10	8.86968e-09
30568	chr11	120086900	120091149	4250	0.952192	2.39079e-10	8.91079e-09
9986	chr3	57580430	57585349	4920	-0.597826	2.40198e-10	8.94054e-09
17831	chr6	86302100	86305179	3080	-0.58033	2.43965e-10	9.06867e-09
28667	chr11	12151680	12155149	3470	1.01553	2.46179e-10	9.13063e-09
34991	chr14	69246880	69253029	6150	0.733897	2.46424e-10	9.13063e-09
34886	chr14	65211330	65215299	3970	0.979661	2.46615e-10	9.13063e-09
33835	chr13	53028330	53030799	2470	-0.738231	2.50339e-10	9.25622e-09
3801	chr1	201528950	201533449	4500	0.703406	2.52797e-10	9.33474e-09
41722	chr17	70333700	70336499	2800	1.03427	2.59307e-10	9.56245e-09
48173	chr22	41345550	41349179	3630	-0.533319	2.64685e-10	9.7479e-09
3103	chr1	154804500	154807099	2600	0.886195	2.72029e-10	1.00051e-08
31253	chr12	12162150	12164479	2330	0.954738	2.75457e-10	1.01179e-08
44873	chr19	47691080	47695049	3970	0.710191	2.75957e-10	1.01229e-08
16880	chr6	26122030	26127399	5370	-0.93179	2.77321e-10	1.01596e-08
20145	chr7	73290550	73292679	2130	1.0982	2.81249e-10	1.02899e-08
42856	chr18	43096050	43099799	3750	1.17507	2.819e-10	1.03002e-08
26943	chr10	74926550	74929499	2950	-0.590415	2.82953e-10	1.03252e-08
40804	chr17	37299100	37306899	7800	0.694803	2.84842e-10	1.03805e-08
18746	chr6	160146850	160150049	3200	-0.621063	2.86952e-10	1.04331e-08
4318	chr1	222816350	222818949	2600	-0.592574	2.87034e-10	1.04331e-08
29550	chr11	65027730	65030849	3120	-0.556308	2.87886e-10	1.04505e-08
6299	chr2	69662000	69666279	4280	-0.529012	2.88821e-10	1.04708e-08
39355	chr16	81036850	81042429	5580	-0.596492	2.91859e-10	1.05672e-08
38751	chr16	49695900	49700229	4330	0.879774	2.98597e-10	1.07971e-08
39185	chr16	70465700	70469049	3350	0.675508	3.02303e-10	1.0917e-08
28668	chr11	12157650	12161699	4050	0.829718	3.05192e-10	1.1007e-08
2634	chr1	114524700	114528849	4150	0.896406	3.07328e-10	1.10698e-08
41870	chr17	73973730	73977179	3450	-0.485493	3.08528e-10	1.10986e-08
21742	chr8	20124050	20127529	3480	0.896281	3.1047e-10	1.11541e-08
34965	chr14	69020380	69024079	3700	0.768252	3.11346e-10	1.11712e-08
12669	chr4	76438280	76441249	2970	-0.636106	3.19415e-10	1.1446e-08
14735	chr5	81640630	81645929	5300	0.933121	3.2342e-10	1.15746e-08
30261	chr11	105891630	105894529	2900	-0.6477	3.25192e-10	1.16231e-08
43785	chr19	10095950	10099299	3350	1.0307	3.26093e-10	1.16404e-08
35670	chr14	103556380	103562149	5770	1.00299	3.40359e-10	1.21341e-08
26026	chr10	18939300	18941879	2580	-0.785967	3.40932e-10	1.2139e-08
18500	chr6	149865850	149868379	2530	-0.630011	3.42304e-10	1.21723e-08
41672	chr17	66394080	66397249	3170	0.872958	3.45842e-10	1.22771e-08
22107	chr8	38242030	38245499	3470	-0.726225	3.4613e-10	1.22771e-08
43487	chr19	2718100	2724849	6750	-0.782053	3.50723e-10	1.24241e-08
45457	chr20	5589880	5593149	3270	-0.640177	3.57186e-10	1.2637e-08
20775	chr7	120590000	120592479	2480	-0.781735	3.59073e-10	1.26773e-08
40067	chr17	7209000	7213099	4100	-0.604555	3.59234e-10	1.26773e-08
13149	chr4	128702180	128705099	2920	-0.58401	3.59771e-10	1.26802e-08
36273	chr15	45490380	45495349	4970	-0.651554	3.72567e-10	1.31011e-08
30311	chr11	111748450	111751349	2900	-0.612105	3.72652e-10	1.31011e-08
34971	chr14	69059380	69061549	2170	1.05186	3.74325e-10	1.31433e-08
33556	chr13	41043380	41046579	3200	0.749338	3.75373e-10	1.31635e-08
35645	chr14	102782180	102787779	5600	-0.615292	3.82647e-10	1.33916e-08
36972	chr15	74459800	74470149	10350	0.831525	3.82836e-10	1.33916e-08
39183	chr16	70451450	70457999	6550	0.633684	3.8749e-10	1.35374e-08
48258	chr22	43009280	43014499	5220	-0.476556	3.93403e-10	1.37267e-08
42501	chr18	12944480	12949399	4920	-0.580779	3.98035e-10	1.3871e-08
30458	chr11	117067780	117078599	10820	0.729548	3.99432e-10	1.39023e-08
23619	chr9	13602850	13605149	2300	0.971739	4.03247e-10	1.40023e-08
27187	chr10	86086600	86090279	3680	-0.737183	4.03673e-10	1.40023e-08
13087	chr4	120566050	120568079	2030	1.30784	4.0419e-10	1.40023e-08
41280	chr17	48715630	48720799	5170	0.781456	4.04529e-10	1.40023e-08
15538	chr5	146932380	146935949	3570	0.922699	4.04817e-10	1.40023e-08
41729	chr17	71060030	71063329	3300	1.04529	4.15321e-10	1.43479e-08
15047	chr5	130505680	130508179	2500	-0.709248	4.20739e-10	1.45171e-08
47698	chr22	29193600	29198279	4680	-0.632509	4.25867e-10	1.46758e-08
3907	chr1	203371900	203378879	6980	0.928766	4.26914e-10	1.46784e-08
36525	chr15	63225480	63228949	3470	0.940125	4.26995e-10	1.46784e-08
40312	chr17	16996230	17014399	18170	0.377048	4.2788e-10	1.46907e-08
31996	chr12	58261400	58264149	2750	0.986236	4.31335e-10	1.47911e-08
3638	chr1	183246850	183261479	14630	0.474446	4.34447e-10	1.48796e-08
4710	chr1	235489330	235493599	4270	-0.569385	4.36786e-10	1.49347e-08
25765	chr10	5815550	5819049	3500	0.86745	4.3713e-10	1.49347e-08
6439	chr2	74516980	74521849	4870	0.807407	4.43613e-10	1.51377e-08
47633	chr22	27282350	27284529	2180	0.906928	4.53818e-10	1.5467e-08
9793	chr3	49822300	49825579	3280	-0.62735	4.62065e-10	1.57288e-08
5131	chr2	11123100	11126399	3300	1.03087	4.64299e-10	1.57856e-08
37886	chr16	2580700	2584049	3350	-0.674192	4.65613e-10	1.5811e-08
34959	chr14	68974780	68978649	3870	0.77566	4.68842e-10	1.58914e-08
42852	chr18	42833000	42835879	2880	1.03772	4.69218e-10	1.58914e-08
11528	chr3	183351950	183359499	7550	-0.635412	4.6969e-10	1.58914e-08
31306	chr12	14925730	14928979	3250	-0.702349	4.70674e-10	1.59054e-08
41165	chr17	45990800	45994699	3900	0.717808	4.73094e-10	1.59536e-08
365	chr1	9487730	9490529	2800	-0.728483	4.73245e-10	1.59536e-08
44877	chr19	47758430	47762579	4150	-0.539235	4.75915e-10	1.60242e-08
12671	chr4	76596830	76600099	3270	-0.629097	4.85508e-10	1.63275e-08
17346	chr6	38606150	38609499	3350	-0.57693	4.87753e-10	1.63832e-08
4096	chr1	208262430	208265049	2620	0.816325	4.94856e-10	1.65711e-08
7474	chr2	157197300	157200499	3200	-0.644316	4.95766e-10	1.65711e-08
22905	chr8	118531830	118534279	2450	-0.678529	4.96022e-10	1.65711e-08
36838	chr15	71086550	71088629	2080	1.17718	4.96097e-10	1.65711e-08
29038	chr11	36470650	36472849	2200	0.931441	4.96317e-10	1.65711e-08
13309	chr4	147441950	147444999	3050	-0.598036	4.97555e-10	1.65925e-08
26360	chr10	35701750	35707199	5450	0.690341	5.00389e-10	1.66671e-08
39071	chr16	67437980	67441799	3820	0.838248	5.01964e-10	1.66996e-08
43322	chr18	77369780	77372699	2920	0.971126	5.05148e-10	1.67855e-08
9266	chr3	25830380	25832829	2450	-0.822874	5.07032e-10	1.6828e-08
18030	chr6	111194400	111198599	4200	-0.732774	5.19211e-10	1.72118e-08
14939	chr5	114960300	114963249	2950	-0.657166	5.28133e-10	1.74867e-08
10690	chr3	124515230	124525449	10220	0.50275	5.30407e-10	1.75412e-08
8054	chr2	203877630	203881429	3800	-0.570448	5.32162e-10	1.75784e-08
5014	chr2	8387030	8390549	3520	1.06324	5.46072e-10	1.80165e-08
2930	chr1	149821150	149825699	4550	-0.848711	5.48322e-10	1.80515e-08
22890	chr8	110345000	110347799	2800	-0.638236	5.48428e-10	1.80515e-08
22127	chr8	38569150	38572599	3450	0.832527	5.49387e-10	1.80618e-08
30079	chr11	85357980	85360249	2270	-0.674488	5.51114e-10	1.80972e-08
27103	chr10	80703550	80706999	3450	1.05166	5.54882e-10	1.81995e-08
24743	chr9	116036400	116039179	2780	-0.630788	5.55767e-10	1.82071e-08
43946	chr19	13186730	13191499	4770	0.676536	5.64879e-10	1.84839e-08
36152	chr15	41406830	41410229	3400	-0.524468	5.7077e-10	1.86548e-08
11242	chr3	156541900	156545679	3780	-0.579932	5.73945e-10	1.87196e-08
10013	chr3	58044930	58052549	7620	0.769555	5.74096e-10	1.87196e-08
43125	chr18	56537680	56539729	2050	1.00009	5.83385e-10	1.90002e-08
28290	chr11	807980	811749	3770	-0.545121	5.85478e-10	1.90461e-08
26392	chr10	38690250	38693479	3230	-0.590566	5.89044e-10	1.91398e-08
4154	chr1	211555200	211557499	2300	-0.626708	5.9487e-10	1.93066e-08
35130	chr14	74317350	74321029	3680	-0.527494	5.99711e-10	1.94411e-08
22088	chr8	37666300	37668499	2200	1.01341	6.09122e-10	1.96892e-08
31732	chr12	50502600	50507649	5050	-0.580338	6.09291e-10	1.96892e-08
27673	chr10	105453950	105457749	3800	0.736401	6.09483e-10	1.96892e-08
4191	chr1	212730550	212735979	5430	-0.692075	6.11399e-10	1.9725e-08
43399	chr19	1359480	1362899	3420	0.913092	6.12007e-10	1.9725e-08
6130	chr2	61107030	61110849	3820	-0.633157	6.16271e-10	1.98395e-08
19466	chr7	27778280	27781199	2920	-0.620629	6.72631e-10	2.16289e-08
17219	chr6	35058830	35061549	2720	0.808874	6.76581e-10	2.17309e-08
27068	chr10	80075780	80078379	2600	0.834432	6.85199e-10	2.19823e-08
2947	chr1	150205850	150209079	3230	-0.651299	7.01328e-10	2.24739e-08
1340	chr1	36862050	36864999	2950	-0.618553	7.0718e-10	2.26354e-08
40272	chr17	15901480	15904749	3270	-0.741106	7.11649e-10	2.27524e-08
22842	chr8	103749300	103753979	4680	0.753145	7.15618e-10	2.2853e-08
35137	chr14	75014850	75021299	6450	0.723917	7.20634e-10	2.29869e-08
11598	chr3	185926680	185929629	2950	0.666482	7.23094e-10	2.3039e-08
39493	chr16	85043500	85046529	3030	-0.506349	7.27546e-10	2.31544e-08
29570	chr11	65221300	65223799	2500	-0.612477	7.33773e-10	2.3326e-08
27017	chr10	76968730	76972129	3400	-0.582243	7.3809e-10	2.34365e-08
780	chr1	21111750	21115299	3550	-0.650904	7.39855e-10	2.34658e-08
15637	chr5	149587500	149594949	7450	1.0525	7.44011e-10	2.35708e-08
3903	chr1	203332430	203335879	3450	0.977284	7.48115e-10	2.36739e-08
43770	chr19	9433530	9436229	2700	-0.687208	7.53354e-10	2.38127e-08
35140	chr14	75055400	75068029	12630	0.516588	7.58508e-10	2.39484e-08
2783	chr1	120903950	120907399	3450	-0.719438	7.63321e-10	2.4057e-08
18731	chr6	159289300	159292299	3000	-0.685669	7.63674e-10	2.4057e-08
11012	chr3	136469250	136472979	3730	-0.511461	7.69783e-10	2.42221e-08
41034	chr17	42400650	42405799	5150	-0.571751	7.70652e-10	2.42221e-08
5522	chr2	30488330	30493429	5100	0.748082	7.81465e-10	2.45322e-08
32758	chr12	117255550	117259129	3580	-0.618529	7.82277e-10	2.45322e-08
23031	chr8	125550050	125552699	2650	-0.651929	7.89775e-10	2.47395e-08
3908	chr1	203408280	203411679	3400	1.01676	8.13112e-10	2.54419e-08
32504	chr12	108953800	108958149	4350	-0.706546	8.25196e-10	2.57911e-08
27181	chr10	85834600	85837729	3130	1.08979	8.28313e-10	2.58595e-08
45188	chr19	56145430	56147899	2470	-0.636281	8.40679e-10	2.62162e-08
17474	chr6	43081600	43085229	3630	0.975585	8.47952e-10	2.64135e-08
9566	chr3	42912000	42914999	3000	1.03993	8.51156e-10	2.64837e-08
21366	chr7	158859380	158864949	5570	0.749101	8.52373e-10	2.6492e-08
17794	chr6	80245700	80248499	2800	-0.718177	8.56109e-10	2.65785e-08
13038	chr4	119198500	119201179	2680	-0.72396	8.66022e-10	2.68563e-08
12977	chr4	108909080	108915199	6120	-0.605182	8.69062e-10	2.69206e-08
34401	chr14	23562950	23566399	3450	-0.570999	8.81379e-10	2.72719e-08
11768	chr3	194272800	194278349	5550	0.886148	8.87807e-10	2.74016e-08
24727	chr9	115140230	115144799	4570	-0.512227	8.87977e-10	2.74016e-08
23029	chr8	125461700	125464379	2680	-0.795755	8.88521e-10	2.74016e-08
9917	chr3	53199530	53202179	2650	0.879703	9.0479e-10	2.78725e-08
34498	chr14	32433630	32435649	2020	0.952758	9.29808e-10	2.86116e-08
47350	chr22	20007050	20015199	8150	-0.625933	9.37942e-10	2.88301e-08
32808	chr12	120030930	120034279	3350	0.784601	9.43369e-10	2.89431e-08
3669	chr1	183951450	183954429	2980	0.861149	9.43695e-10	2.89431e-08
36107	chr15	40379800	40382879	3080	0.758947	9.51045e-10	2.91165e-08
20800	chr7	124568630	124571849	3220	-0.679522	9.51437e-10	2.91165e-08
36262	chr15	45001650	45005929	4280	-0.600301	9.52582e-10	2.91195e-08
42347	chr18	6780380	6782749	2370	0.979349	9.69293e-10	2.95979e-08
27100	chr10	80690130	80694149	4020	0.882365	9.72577e-10	2.96657e-08
31703	chr12	50045900	50053499	7600	0.746539	9.75243e-10	2.97145e-08
11252	chr3	156891150	156894799	3650	-0.586506	9.80917e-10	2.98548e-08
11981	chr4	2245000	2248679	3680	0.786156	9.98113e-10	3.0345e-08
42548	chr18	14131050	14133949	2900	-0.747915	1.00027e-09	3.03774e-08
4545	chr1	230137000	230139149	2150	0.999466	1.00907e-09	3.06112e-08
33996	chr13	98084030	98088049	4020	-0.677427	1.01593e-09	3.07861e-08
44772	chr19	45969700	45974279	4580	-0.814835	1.01813e-09	3.08193e-08
16875	chr6	26031080	26035449	4370	-0.888888	1.03032e-09	3.11116e-08
33815	chr13	52373580	52380699	7120	-0.460599	1.03052e-09	3.11116e-08
5078	chr2	9776830	9780999	4170	0.666902	1.03114e-09	3.11116e-08
14761	chr5	89704300	89706999	2700	-0.664799	1.03243e-09	3.11167e-08
11889	chr3	197145830	197148799	2970	0.822681	1.03935e-09	3.12917e-08
41397	chr17	55957150	55960679	3530	0.736215	1.05243e-09	3.16512e-08
44954	chr19	49374150	49383779	9630	-0.534327	1.05453e-09	3.16802e-08
28793	chr11	17097780	17100799	3020	-0.511122	1.05828e-09	3.17587e-08
8614	chr2	238343100	238347849	4750	0.893347	1.0634e-09	3.1877e-08
9547	chr3	42630950	42634099	3150	-0.690538	1.06451e-09	3.1877e-08
7292	chr2	129037500	129042429	4930	0.768148	1.06983e-09	3.20019e-08
48089	chr22	39100280	39103749	3470	-0.659641	1.08473e-09	3.2413e-08
18959	chr6	169562180	169564749	2570	1.22815	1.09076e-09	3.2558e-08
21955	chr8	27466930	27470129	3200	0.717669	1.11511e-09	3.32418e-08
26130	chr10	27527880	27533349	5470	-0.540288	1.11605e-09	3.32418e-08
6740	chr2	98278250	98282099	3850	-0.542506	1.12193e-09	3.33813e-08
2952	chr1	150252980	150256829	3850	-0.886396	1.12828e-09	3.35345e-08
24770	chr9	116408550	116414499	5950	0.651887	1.13289e-09	3.36356e-08
18572	chr6	151999730	152003999	4270	0.823739	1.1512e-09	3.41428e-08
48391	chr22	45910230	45913199	2970	0.982194	1.15687e-09	3.42746e-08
27395	chr10	95969500	95971829	2330	0.968659	1.18036e-09	3.49334e-08
19551	chr7	30901100	30911649	10550	0.707755	1.18714e-09	3.50967e-08
24523	chr9	101753850	101758599	4750	0.820401	1.21579e-09	3.58966e-08
37106	chr15	78314800	78317699	2900	0.906686	1.21748e-09	3.58966e-08
16030	chr5	171975250	171979579	4330	0.720445	1.21806e-09	3.58966e-08
17395	chr6	41394130	41398949	4820	0.898583	1.22235e-09	3.59852e-08
26860	chr10	73197550	73199879	2330	1.02307	1.22375e-09	3.59882e-08
7192	chr2	121514980	121517949	2970	0.962779	1.24693e-09	3.66313e-08
25207	chr9	132232150	132237799	5650	0.838459	1.25589e-09	3.68558e-08
25242	chr9	132944430	132950599	6170	1.05298	1.26845e-09	3.71552e-08
28134	chr10	129823550	129828929	5380	0.711428	1.26876e-09	3.71552e-08
5519	chr2	30445380	30451129	5750	0.562722	1.27919e-09	3.74212e-08
39591	chr16	87349600	87352379	2780	-0.701705	1.28501e-09	3.75523e-08
24486	chr9	100393630	100397449	3820	-0.57862	1.29163e-09	3.77062e-08
36675	chr15	67062880	67069449	6570	0.528791	1.3026e-09	3.79865e-08
45216	chr19	57348680	57352949	4270	-0.704878	1.31094e-09	3.819e-08
40769	chr17	36589530	36592679	3150	0.78773	1.32921e-09	3.86416e-08
8598	chr2	238107430	238111429	4000	1.10303	1.32922e-09	3.86416e-08
22195	chr8	42148450	42152549	4100	0.846607	1.33675e-09	3.88201e-08
17393	chr6	41038650	41043179	4530	-0.592954	1.34485e-09	3.90145e-08
46261	chr20	47661380	47664479	3100	-0.651096	1.34948e-09	3.91069e-08
2755	chr1	118147080	118150999	3920	-0.577283	1.35084e-09	3.91069e-08
16755	chr6	16758000	16764699	6700	-0.709468	1.37393e-09	3.97344e-08
9478	chr3	39181830	39186429	4600	0.697473	1.41027e-09	4.0743e-08
27182	chr10	85898630	85900899	2270	-0.763004	1.43009e-09	4.12696e-08
47246	chr22	18119450	18123729	4280	-0.580716	1.43146e-09	4.12696e-08
31228	chr12	10873900	10877329	3430	-0.61308	1.43605e-09	4.13592e-08
26893	chr10	73728780	73748399	19620	0.389406	1.43893e-09	4.13994e-08
24316	chr9	95395900	95398379	2480	0.924764	1.44063e-09	4.14056e-08
24204	chr9	89881730	89886849	5120	0.748286	1.46514e-09	4.20666e-08
22404	chr8	66545030	66547249	2220	-0.668024	1.46763e-09	4.20947e-08
33168	chr12	133462700	133465829	3130	-0.584404	1.47615e-09	4.22955e-08
381	chr1	9776600	9779899	3300	0.940362	1.48477e-09	4.24989e-08
24766	chr9	116370680	116380599	9920	0.502935	1.49885e-09	4.2858e-08
47110	chr21	45603950	45607949	4000	0.852036	1.51454e-09	4.32621e-08
8308	chr2	220328530	220344699	16170	0.669998	1.52619e-09	4.35502e-08
35532	chr14	96503800	96507499	3700	1.01007	1.53152e-09	4.36578e-08
26623	chr10	53620700	53622799	2100	1.2454	1.53474e-09	4.37049e-08
4095	chr1	208255750	208257949	2200	0.931016	1.55567e-09	4.42555e-08
38639	chr16	31074900	31077829	2930	0.746811	1.56363e-09	4.44366e-08
46281	chr20	48198700	48213849	15150	0.787873	1.57423e-09	4.46584e-08
36661	chr15	66945980	66951229	5250	0.743211	1.57463e-09	4.46584e-08
36746	chr15	68655030	68665149	10120	0.4162	1.58078e-09	4.47872e-08
36905	chr15	72408500	72411899	3400	-0.67923	1.59849e-09	4.52431e-08
16871	chr6	25991150	25994799	3650	-0.608377	1.60217e-09	4.5301e-08
24491	chr9	100682930	100685849	2920	-0.68665	1.63926e-09	4.63028e-08
44767	chr19	45925480	45929429	3950	-0.554363	1.65389e-09	4.66687e-08
19796	chr7	45024680	45027729	3050	-0.578768	1.67686e-09	4.72693e-08
24164	chr9	86062280	86065479	3200	0.841614	1.68313e-09	4.7398e-08
37567	chr15	93822550	93824649	2100	1.00696	1.69973e-09	4.7817e-08
48120	chr22	39708250	39717429	9180	-0.454029	1.73615e-09	4.87926e-08
24076	chr9	72872350	72875429	3080	-0.480134	1.73864e-09	4.88132e-08
28099	chr10	126810630	126814649	4020	-0.597809	1.76493e-09	4.95015e-08
34975	chr14	69102850	69107499	4650	0.630096	1.77045e-09	4.96065e-08
31880	chr12	54777530	54780449	2920	1.03225	1.77611e-09	4.97149e-08
30680	chr11	125132280	125135129	2850	0.974498	1.79352e-09	5.0152e-08
8433	chr2	232045630	232058479	12850	0.839093	1.79812e-09	5.02302e-08
36610	chr15	65145530	65151499	5970	0.785474	1.80042e-09	5.02442e-08
10359	chr3	99535150	99538029	2880	-0.67941	1.81799e-09	5.06838e-08
25449	chr9	137482100	137485249	3150	1.08404	1.83044e-09	5.09797e-08
46279	chr20	48190900	48193649	2750	0.966786	1.83413e-09	5.09843e-08
5307	chr2	23810930	23820129	9200	0.769096	1.83426e-09	5.09843e-08
273	chr1	7842150	7846079	3930	-0.685927	1.83688e-09	5.10064e-08
4712	chr1	235664550	235669879	5330	-0.59363	1.85339e-09	5.14135e-08
3948	chr1	204234000	204236599	2600	0.911837	1.87474e-09	5.19542e-08
45268	chr19	58837180	58839779	2600	-0.563913	1.88185e-09	5.20994e-08
35890	chr15	25812250	25814649	2400	0.882624	1.89072e-09	5.22932e-08
44198	chr19	18666650	18670099	3450	-0.63585	1.91361e-09	5.28541e-08
5826	chr2	43436450	43439279	2830	0.912508	1.9148e-09	5.28541e-08
16393	chr6	3722200	3728099	5900	0.721072	1.92192e-09	5.29983e-08
17036	chr6	31163650	31167429	3780	-0.585291	1.93166e-09	5.32141e-08
33930	chr13	77598650	77602629	3980	-0.598343	1.94609e-09	5.35587e-08
15243	chr5	137909850	137912979	3130	-0.587101	1.96012e-09	5.38579e-08
23720	chr9	26891450	26893899	2450	-0.694871	1.96082e-09	5.38579e-08
32401	chr12	104322130	104325649	3520	-0.618643	1.99171e-09	5.46523e-08
7061	chr2	112134000	112136279	2280	0.840448	2.01938e-09	5.53573e-08
31769	chr12	51631000	51634649	3650	-0.520519	2.05118e-09	5.61736e-08
27340	chr10	93682350	93685049	2700	-0.720996	2.06767e-09	5.65698e-08
3013	chr1	151880650	151883399	2750	-0.612261	2.08544e-09	5.69763e-08
2544	chr1	110949050	110951679	2630	-0.480371	2.08662e-09	5.69763e-08
9407	chr3	37615630	37618549	2920	0.805424	2.13104e-09	5.81193e-08
10500	chr3	112993800	112996299	2500	0.872155	2.13375e-09	5.81193e-08
40723	chr17	33893850	33896479	2630	-0.589145	2.13473e-09	5.81193e-08
43772	chr19	9544900	9547679	2780	-0.527596	2.1633e-09	5.88397e-08
6172	chr2	62460900	62463949	3050	0.830606	2.19172e-09	5.95545e-08
35268	chr14	77922580	77925849	3270	-0.553382	2.19741e-09	5.96509e-08
5701	chr2	39346100	39353079	6980	-0.393644	2.20149e-09	5.97038e-08
35400	chr14	91719230	91722579	3350	0.941613	2.20625e-09	5.97746e-08
28601	chr11	10771250	10774279	3030	-0.573389	2.2374e-09	6.05597e-08
8202	chr2	217838530	217840779	2250	0.928425	2.24205e-09	6.06082e-08
10595	chr3	121467180	121470199	3020	-0.647393	2.24354e-09	6.06082e-08
32973	chr12	123882100	123885629	3530	0.933905	2.27158e-09	6.13063e-08
42408	chr18	9135100	9139099	4000	-0.536949	2.27454e-09	6.13268e-08
30565	chr11	120052780	120062149	9370	0.682676	2.27819e-09	6.13658e-08
41227	chr17	47863100	47867949	4850	-0.587562	2.30483e-09	6.20235e-08
29501	chr11	64083600	64088099	4500	-0.462495	2.3324e-09	6.26791e-08
30058	chr11	82610080	82613249	3170	-0.560641	2.33369e-09	6.26791e-08
10860	chr3	128596830	128600349	3520	-0.618431	2.34047e-09	6.28006e-08
27358	chr10	94350180	94353279	3100	-0.583024	2.35452e-09	6.31171e-08
3834	chr1	201923050	201926099	3050	-0.611952	2.35994e-09	6.32014e-08
33441	chr13	33111130	33114249	3120	-0.710631	2.37588e-09	6.35673e-08
36641	chr15	66082880	66086079	3200	-0.664876	2.3829e-09	6.36941e-08
5397	chr2	26941930	26945599	3670	-0.591593	2.49289e-09	6.65423e-08
2889	chr1	147399550	147401879	2330	-0.684143	2.49423e-09	6.65423e-08
16228	chr5	178011500	178013849	2350	1.13635	2.50952e-09	6.68862e-08
11901	chr3	197280050	197283479	3430	-0.622746	2.51597e-09	6.6994e-08
12771	chr4	84374650	84378099	3450	-0.684535	2.53153e-09	6.73441e-08
16877	chr6	26055050	26058129	3080	-0.919463	2.53688e-09	6.74221e-08
10392	chr3	99978000	99981229	3230	-0.643969	2.54075e-09	6.74604e-08
4042	chr1	206668550	206672049	3500	0.987704	2.54564e-09	6.7526e-08
23738	chr9	33000280	33002949	2670	-0.685104	2.61486e-09	6.92963e-08
34966	chr14	69027550	69032949	5400	0.683283	2.63516e-09	6.97679e-08
11332	chr3	169488650	169492449	3800	-0.575361	2.64664e-09	7.00055e-08
3292	chr1	162529900	162533179	3280	-0.643641	2.6738e-09	7.06567e-08
19074	chr7	904830	910349	5520	-0.606357	2.68305e-09	7.08341e-08
29237	chr11	47868580	47871349	2770	-0.55463	2.72601e-09	7.19003e-08
43927	chr19	13000330	13003249	2920	-0.770186	2.73124e-09	7.19699e-08
18423	chr6	144018880	144024449	5570	0.737928	2.7383e-09	7.20878e-08
9844	chr3	51532450	51535679	3230	-0.642878	2.74484e-09	7.2192e-08
2933	chr1	149870330	149872699	2370	-0.577924	2.76392e-09	7.2556e-08
38461	chr16	25116900	25124479	7580	-0.492277	2.76468e-09	7.2556e-08
4016	chr1	205717250	205720799	3550	-0.582742	2.76649e-09	7.2556e-08
23569	chr9	5436450	5439599	3150	-0.521407	2.77616e-09	7.27412e-08
48217	chr22	42077250	42079779	2530	-0.674341	2.80138e-09	7.32998e-08
24284	chr9	93953400	93959849	6450	-0.549702	2.80324e-09	7.32998e-08
18207	chr6	126100880	126103149	2270	-0.845308	2.80537e-09	7.32998e-08
40063	chr17	7153050	7157199	4150	-0.476535	2.84252e-09	7.4177e-08
43118	chr18	56451130	56453499	2370	0.807648	2.84427e-09	7.4177e-08
36368	chr15	55487750	55490679	2930	-0.630578	2.86366e-09	7.46017e-08
45723	chr20	23632680	23638099	5420	0.824059	2.8659e-09	7.46017e-08
11251	chr3	156876200	156880549	4350	-0.549159	2.88564e-09	7.50454e-08
35004	chr14	69427630	69429899	2270	1.03973	2.95902e-09	7.6882e-08
43646	chr19	5716630	5721979	5350	-0.634085	2.97447e-09	7.72116e-08
5821	chr2	43394750	43403149	8400	0.644625	2.97989e-09	7.72805e-08
16415	chr6	4020650	4023229	2580	-0.590501	3.01273e-09	7.80595e-08
41836	chr17	73493780	73498949	5170	0.784737	3.06684e-09	7.93876e-08
14776	chr5	90674700	90680579	5880	-0.753244	3.17515e-09	8.21151e-08
41296	chr17	48939780	48947499	7720	-0.45309	3.19899e-09	8.26166e-08
31872	chr12	54670750	54676199	5450	-0.654458	3.20047e-09	8.26166e-08
13044	chr4	119605550	119607849	2300	-0.67754	3.21058e-09	8.28009e-08
42935	chr18	46136500	46140979	4480	0.848405	3.28425e-09	8.46226e-08
16157	chr5	175873480	175876849	3370	-0.432503	3.2921e-09	8.47464e-08
5679	chr2	38264280	38266529	2250	0.959357	3.29563e-09	8.47592e-08
29648	chr11	67006080	67009449	3370	-0.569663	3.30259e-09	8.48599e-08
30350	chr11	112654050	112658549	4500	0.625559	3.33152e-09	8.55243e-08
13711	chr4	186057680	186068749	11070	-0.585424	3.38019e-09	8.66151e-08
32968	chr12	123716280	123719599	3320	-0.569331	3.38022e-09	8.66151e-08
44279	chr19	22017630	22020449	2820	-0.555046	3.52187e-09	9.01619e-08
40147	chr17	8610300	8612349	2050	1.03379	3.53401e-09	9.03895e-08
29476	chr11	63790080	63792899	2820	0.826832	3.54791e-09	9.06621e-08
23815	chr9	34987800	34998499	10700	-0.538805	3.55469e-09	9.0752e-08
14739	chr5	82371930	82374779	2850	-0.707949	3.59298e-09	9.16457e-08
20051	chr7	66117830	66121199	3370	-0.544067	3.62568e-09	9.23952e-08
20114	chr7	72459600	72462449	2850	0.778588	3.6863e-09	9.38543e-08
8146	chr2	211034230	211037729	3500	-0.628796	3.73117e-09	9.49099e-08
25948	chr10	14782080	14784349	2270	0.992232	3.73824e-09	9.5003e-08
10527	chr3	114864330	114868149	3820	-0.566037	3.75437e-09	9.53262e-08
14827	chr5	98262550	98266879	4330	-0.635808	3.76107e-09	9.54094e-08
10688	chr3	124488150	124494549	6400	0.451145	3.7663e-09	9.54552e-08
47683	chr22	28313550	28317049	3500	-0.514939	3.79136e-09	9.60029e-08
3958	chr1	204307100	204309499	2400	1.20526	3.80096e-09	9.61588e-08
20500	chr7	100024730	100029729	5000	-0.531278	3.82126e-09	9.65847e-08
17475	chr6	43087830	43090199	2370	0.906834	3.83796e-09	9.6919e-08
35104	chr14	73645250	73649149	3900	0.848605	3.85058e-09	9.71496e-08
19790	chr7	44794130	44798029	3900	0.787291	3.85893e-09	9.72723e-08
24729	chr9	115479080	115481299	2220	-0.767622	3.95589e-09	9.96263e-08
18706	chr6	158588380	158590799	2420	-0.529938	3.98412e-09	1.00247e-07
2642	chr1	115051650	115055649	4000	-0.515326	4.01246e-09	1.00869e-07
3152	chr1	155825800	155831429	5630	-0.534512	4.07205e-09	1.02275e-07
9564	chr3	42883800	42890229	6430	1.11989	4.12384e-09	1.03482e-07
29306	chr11	59381480	59385129	3650	-0.650783	4.1397e-09	1.03787e-07
37069	chr15	77286400	77290079	3680	0.899946	4.19236e-09	1.05013e-07
40038	chr17	5321550	5324999	3450	-0.520256	4.25044e-09	1.06372e-07
13083	chr4	120374380	120377649	3270	-0.59708	4.29843e-09	1.07476e-07
45023	chr19	50527400	50530649	3250	-0.612241	4.32431e-09	1.08026e-07
38747	chr16	49561200	49563749	2550	1.02973	4.41787e-09	1.10265e-07
25724	chr10	4305000	4308349	3350	0.849892	4.4423e-09	1.10699e-07
9749	chr3	49065280	49067929	2650	-0.669285	4.44322e-09	1.10699e-07
29634	chr11	66443900	66446849	2950	-0.6258	4.46073e-09	1.11036e-07
30771	chr11	128595000	128599249	4250	0.699154	4.48737e-09	1.11518e-07
32655	chr12	112449480	112453029	3550	-0.565757	4.48809e-09	1.11518e-07
6533	chr2	86037850	86039899	2050	0.849755	4.49505e-09	1.11532e-07
33325	chr13	28021600	28026249	4650	-0.52562	4.49664e-09	1.11532e-07
31188	chr12	8233550	8235979	2430	-0.670268	4.62853e-09	1.14701e-07
13483	chr4	159643180	159645949	2770	-0.562216	4.64541e-09	1.15017e-07
31632	chr12	48165630	48172929	7300	0.611272	4.69566e-09	1.16158e-07
40284	chr17	16322250	16324299	2050	1.12002	4.70808e-09	1.16362e-07
2209	chr1	85740730	85743849	3120	-0.586489	4.73927e-09	1.17029e-07
6375	chr2	71837230	71839499	2270	0.941065	4.75131e-09	1.17223e-07
29786	chr11	69916050	69920779	4730	0.898341	4.75757e-09	1.17262e-07
30787	chr11	129870500	129875229	4730	-0.43769	4.76129e-09	1.17262e-07
42287	chr18	2654000	2657849	3850	-0.636848	4.76617e-09	1.17278e-07
19110	chr7	1568950	1581479	12530	-0.53853	4.77593e-09	1.17415e-07
43880	chr19	11668800	11671299	2500	-0.632729	4.78062e-09	1.17426e-07
29361	chr11	61365200	61368429	3230	0.811051	4.86694e-09	1.19441e-07
24841	chr9	123704050	123706149	2100	1.09005	4.88658e-09	1.19818e-07
12168	chr4	8441200	8443449	2250	-0.649367	4.97487e-09	1.21876e-07
34376	chr14	23056900	23059779	2880	-0.650133	4.98968e-09	1.22131e-07
17564	chr6	44442350	44444999	2650	0.862921	5.01853e-09	1.2273e-07
38254	chr16	15735530	15738299	2770	-0.607143	5.02857e-09	1.22867e-07
7145	chr2	120123050	120129629	6580	-0.471194	5.08083e-09	1.24035e-07
30698	chr11	125460750	125465349	4600	-0.539098	5.09281e-09	1.24219e-07
1299	chr1	35585550	35587749	2200	1.04317	5.13693e-09	1.25186e-07
29493	chr11	64006800	64011179	4380	-0.517694	5.19207e-09	1.26419e-07
20247	chr7	75573530	75581949	8420	-0.562688	5.25623e-09	1.27869e-07
44538	chr19	39366130	39370329	4200	0.900958	5.34992e-09	1.30035e-07
18749	chr6	160255480	160259149	3670	0.901601	5.36737e-09	1.30346e-07
29406	chr11	62164650	62172749	8100	0.548856	5.4084e-09	1.31228e-07
41239	chr17	48184330	48195199	10870	-0.471176	5.46926e-09	1.32589e-07
1753	chr1	53661350	53665879	4530	-0.547386	5.49293e-09	1.33047e-07
652	chr1	17090150	17093979	3830	0.85565	5.49782e-09	1.3305e-07
1586	chr1	45204230	45206479	2250	-0.655166	5.51573e-09	1.33368e-07
47421	chr22	22018830	22021879	3050	-0.499286	5.54545e-09	1.3397e-07
10404	chr3	101291700	101294679	2980	-0.685157	5.57362e-09	1.34534e-07
4264	chr1	218581430	218583549	2120	1.04449	5.61731e-09	1.35472e-07
22825	chr8	103249680	103253099	3420	-0.660085	5.63459e-09	1.3566e-07
11109	chr3	142165400	142168129	2730	-0.563657	5.63486e-09	1.3566e-07
21941	chr8	27131230	27133349	2120	-0.706303	5.66148e-09	1.36183e-07
10505	chr3	113463550	113467399	3850	-0.562324	5.72533e-09	1.376e-07
45178	chr19	56055250	56062499	7250	-0.455514	5.79768e-09	1.39219e-07
18076	chr6	112407500	112410049	2550	-0.601693	5.86392e-09	1.40689e-07
27488	chr10	99307650	99310999	3350	0.866401	5.90657e-09	1.41562e-07
18698	chr6	158426900	158433099	6200	0.648275	5.91048e-09	1.41562e-07
44169	chr19	18302250	18307799	5550	-0.588114	5.92518e-09	1.41792e-07
22353	chr8	59009480	59012429	2950	0.75138	5.95445e-09	1.42371e-07
41884	chr17	74371150	74373879	2730	0.832709	6.04634e-09	1.44444e-07
31928	chr12	56691730	56697199	5470	-0.435656	6.0715e-09	1.44921e-07
46264	chr20	47834380	47837629	3250	-0.612269	6.09775e-09	1.45423e-07
5795	chr2	43129100	43139349	10250	0.624986	6.13292e-09	1.46136e-07
18627	chr6	155634150	155637179	3030	-0.628448	6.15307e-09	1.46418e-07
32836	chr12	120965500	120968729	3230	-0.527917	6.15524e-09	1.46418e-07
27621	chr10	104363080	104365249	2170	0.960138	6.16877e-09	1.46575e-07
38312	chr16	19077530	19080679	3150	-0.764084	6.17233e-09	1.46575e-07
42252	chr17	80837550	80845099	7550	0.765712	6.32755e-09	1.50133e-07
5941	chr2	46842250	46845549	3300	-0.624548	6.36043e-09	1.50784e-07
9830	chr3	50603050	50608629	5580	-0.391869	6.41476e-09	1.51943e-07
11185	chr3	150320050	150323649	3600	-0.539375	6.50144e-09	1.53866e-07
9210	chr3	19987130	19990399	3270	-0.529553	6.54968e-09	1.54876e-07
20869	chr7	129780000	129782649	2650	0.820127	6.56814e-09	1.55181e-07
8604	chr2	238187600	238189649	2050	1.007	6.60528e-09	1.55838e-07
2297	chr1	92252080	92255799	3720	0.81105	6.60713e-09	1.55838e-07
22426	chr8	67339500	67352799	13300	-0.432546	6.6199e-09	1.56007e-07
43635	chr19	5286630	5295199	8570	0.915328	6.72929e-09	1.58451e-07
21365	chr7	158856550	158858899	2350	0.839717	6.76895e-09	1.59212e-07
24507	chr9	101623150	101631949	8800	0.564363	6.77305e-09	1.59212e-07
17560	chr6	44353780	44356679	2900	-0.691721	6.7941e-09	1.59573e-07
31779	chr12	52261650	52263929	2280	0.908569	6.85469e-09	1.6086e-07
12966	chr4	106628550	106631149	2600	-0.59343	6.89405e-09	1.61648e-07
8242	chr2	218659950	218666679	6730	0.513651	6.90164e-09	1.6169e-07
30068	chr11	82781500	82784879	3380	-0.588393	6.91616e-09	1.61894e-07
10917	chr3	129305250	129307299	2050	0.908174	6.99381e-09	1.63574e-07
42200	chr17	80224030	80227329	3300	-0.633072	7.05855e-09	1.6495e-07
2346	chr1	94343330	94345849	2520	-0.633985	7.14169e-09	1.66628e-07
28771	chr11	16808780	16816399	7620	0.68749	7.14336e-09	1.66628e-07
12070	chr4	6731880	6735579	3700	0.797148	7.14828e-09	1.66628e-07
32532	chr12	109204430	109211679	7250	0.495755	7.16067e-09	1.66777e-07
22515	chr8	80940930	80943799	2870	-0.534271	7.20583e-09	1.67689e-07
44445	chr19	36245350	36250449	5100	-0.528644	7.2908e-09	1.69525e-07
38393	chr16	22199380	22205629	6250	-0.588907	7.35065e-09	1.70774e-07
3451	chr1	171453880	171456229	2350	-0.605155	7.36015e-09	1.70852e-07
9492	chr3	39952530	39954579	2050	1.09849	7.37547e-09	1.71065e-07
42247	chr17	80815950	80818799	2850	0.755483	7.50439e-09	1.73911e-07
30353	chr11	112701900	112707879	5980	0.765529	7.55527e-09	1.74945e-07
13443	chr4	154417030	154421629	4600	0.649197	7.57168e-09	1.75023e-07
31168	chr12	7078100	7081399	3300	-0.543225	7.5769e-09	1.75023e-07
19417	chr7	23219800	23223479	3680	-0.574785	7.57846e-09	1.75023e-07
34596	chr14	39638330	39640749	2420	-0.49923	7.58375e-09	1.75023e-07
16264	chr5	179192050	179194249	2200	1.03575	7.69543e-09	1.77453e-07
13427	chr4	153699630	153702649	3020	-0.489037	7.79742e-09	1.79657e-07
48257	chr22	43004800	43007449	2650	0.84705	7.84079e-09	1.80414e-07
30013	chr11	76792530	76795349	2820	0.893409	7.84326e-09	1.80414e-07
29368	chr11	61455030	61459249	4220	0.808037	7.90896e-09	1.81776e-07
23158	chr8	132914880	132918099	3220	-0.56245	7.91727e-09	1.81817e-07
20503	chr7	100046500	100049999	3500	-0.577778	7.93114e-09	1.81985e-07
17195	chr6	34662350	34666099	3750	-0.586155	7.9482e-09	1.82183e-07
10957	chr3	133291050	133294729	3680	-0.612042	7.95284e-09	1.82183e-07
3190	chr1	156673800	156679129	5330	0.800709	7.9949e-09	1.82997e-07
17548	chr6	44143930	44146049	2120	0.795908	8.06779e-09	1.84513e-07
9501	chr3	40497130	40500349	3220	-0.636018	8.27893e-09	1.89187e-07
33751	chr13	49874900	49884329	9430	0.626488	8.32406e-09	1.90063e-07
9689	chr3	47820850	47825529	4680	-0.503885	8.33328e-09	1.90118e-07
7108	chr2	114194430	114196699	2270	-0.579664	8.34363e-09	1.90198e-07
15892	chr5	162885880	162888999	3120	-0.711443	8.43581e-09	1.92142e-07
37870	chr16	2208050	2212749	4700	0.954559	8.47974e-09	1.92985e-07
17136	chr6	33376700	33380679	3980	-0.629439	8.50533e-09	1.93356e-07
34960	chr14	68978950	68981049	2100	0.97538	8.50989e-09	1.93356e-07
35902	chr15	26074230	26077199	2970	1.11554	8.52658e-09	1.93577e-07
35200	chr14	76071550	76073599	2050	0.964641	8.54007e-09	1.93726e-07
34675	chr14	53017850	53021579	3730	-0.648569	8.55263e-09	1.93853e-07
15719	chr5	153600100	153602129	2030	0.960224	8.74709e-09	1.98099e-07
19745	chr7	44139400	44149099	9700	0.993291	8.75648e-09	1.98151e-07
7404	chr2	136287250	136290749	3500	-0.655675	8.85238e-09	2.00159e-07
45166	chr19	55793830	55797849	4020	0.798071	8.89642e-09	2.00876e-07
40146	chr17	8599600	8603629	4030	1.27631	8.89851e-09	2.00876e-07
25817	chr10	7602400	7606249	3850	0.588932	8.91341e-09	2.01049e-07
11818	chr3	194941700	194945879	4180	0.824949	8.97421e-09	2.02257e-07
43281	chr18	74201750	74209379	7630	-0.598058	9.1301e-09	2.05604e-07
27787	chr10	112677480	112681149	3670	-0.544607	9.14643e-09	2.05806e-07
34035	chr13	99589300	99592749	3450	0.799916	9.2047e-09	2.06889e-07
26641	chr10	60614400	60618229	3830	0.732848	9.20942e-09	2.06889e-07
15080	chr5	131797750	131803299	5550	0.539519	9.27381e-09	2.08168e-07
36158	chr15	41574680	41577679	3000	-0.53958	9.31613e-09	2.0895e-07
23146	chr8	131510330	131515179	4850	0.750979	9.37134e-09	2.10019e-07
15059	chr5	131554180	131556899	2720	0.708496	9.42329e-09	2.10947e-07
1214	chr1	33114930	33118349	3420	-0.576499	9.42787e-09	2.10947e-07
42959	chr18	46358930	46371799	12870	0.663266	9.46445e-09	2.11468e-07
8309	chr2	220346100	220349799	3700	1.1757	9.46634e-09	2.11468e-07
23931	chr9	41952980	41955949	2970	-0.49055	9.4975e-09	2.11994e-07
43945	chr19	13160280	13184699	24420	0.405373	9.50578e-09	2.12009e-07
19514	chr7	30065150	30069749	4600	-0.588245	9.59518e-09	2.13832e-07
48389	chr22	45898750	45902249	3500	0.818397	9.65222e-09	2.14932e-07
40966	chr17	41320780	41324949	4170	-0.594543	9.72083e-09	2.16286e-07
18387	chr6	139964380	139967879	3500	0.849747	9.74716e-09	2.16699e-07
25450	chr9	137488950	137491899	2950	1.00365	9.756e-09	2.16723e-07
3192	chr1	156696950	156700279	3330	-0.682313	9.77265e-09	2.1692e-07
2644	chr1	115211250	115214149	2900	-0.727329	9.79292e-09	2.17197e-07
13717	chr4	186345780	186348549	2770	-0.537428	9.85205e-09	2.18335e-07
41937	chr17	75308750	75310849	2100	0.93842	1.00962e-08	2.23567e-07
40820	chr17	37616300	37620499	4200	-0.491105	1.01188e-08	2.2389e-07
6240	chr2	65518550	65522399	3850	0.818289	1.01748e-08	2.24952e-07
39219	chr16	71841180	71844549	3370	-0.512842	1.02306e-08	2.26006e-07
31709	chr12	50134480	50137129	2650	-0.599884	1.02528e-08	2.2615e-07
10154	chr3	66442430	66446179	3750	0.774989	1.02533e-08	2.2615e-07
39822	chr17	1100150	1102899	2750	0.786924	1.03331e-08	2.27728e-07
29437	chr11	62597750	62601149	3400	-0.480449	1.03627e-08	2.282e-07
27136	chr10	81189150	81207799	18650	0.332632	1.0492e-08	2.30865e-07
41857	chr17	73778050	73783629	5580	-0.436626	1.05774e-08	2.32561e-07
20770	chr7	117822500	117825329	2830	-0.648929	1.05968e-08	2.32729e-07
14622	chr5	74631430	74634449	3020	-0.664509	1.06017e-08	2.32729e-07
36258	chr15	44827250	44830899	3650	-0.54397	1.06145e-08	2.32827e-07
6672	chr2	96674880	96677879	3000	-0.663108	1.06303e-08	2.32965e-07
30270	chr11	107990350	107997579	7230	-0.513199	1.06375e-08	2.32965e-07
2470	chr1	109631900	109634649	2750	-0.648125	1.06635e-08	2.33351e-07
26876	chr10	73482730	73490249	7520	0.528858	1.06922e-08	2.33795e-07
35609	chr14	102273750	102277599	3850	-0.750611	1.07465e-08	2.34799e-07
5024	chr2	8674150	8678249	4100	0.724183	1.0927e-08	2.38554e-07
44793	chr19	46193900	46197549	3650	-0.647284	1.09538e-08	2.38951e-07
43059	chr18	55287630	55290749	3120	-0.519332	1.09795e-08	2.39325e-07
33296	chr13	25874200	25877199	3000	-0.573343	1.12295e-08	2.44584e-07
5147	chr2	11634980	11637479	2500	-0.698507	1.13949e-08	2.47993e-07
36659	chr15	66933280	66935349	2070	0.834197	1.14788e-08	2.49624e-07
21913	chr8	26239150	26244049	4900	-0.577164	1.15506e-08	2.50989e-07
4233	chr1	214543650	214547299	3650	0.915299	1.16266e-08	2.52444e-07
42960	chr18	46373430	46382299	8870	0.601103	1.16786e-08	2.53375e-07
10336	chr3	93698150	93700479	2330	-0.682129	1.17197e-08	2.5407e-07
45033	chr19	50859630	50863129	3500	-0.710888	1.17901e-08	2.55397e-07
15098	chr5	132386050	132389249	3200	-0.504398	1.18504e-08	2.56363e-07
41558	chr17	62239380	62243899	4520	0.78481	1.18531e-08	2.56363e-07
22405	chr8	66555800	66558849	3050	-0.657807	1.19198e-08	2.57582e-07
18456	chr6	147522980	147526779	3800	-0.538361	1.19279e-08	2.57582e-07
36012	chr15	34515180	34518379	3200	-0.514033	1.19882e-08	2.58684e-07
5454	chr2	28111980	28115099	3120	-0.509771	1.20777e-08	2.60413e-07
29181	chr11	46694100	46701049	6950	0.490645	1.20953e-08	2.60591e-07
5357	chr2	25553250	25564229	10980	0.528929	1.21456e-08	2.61473e-07
18960	chr6	169566100	169572549	6450	1.05357	1.21874e-08	2.62169e-07
41422	chr17	56593780	56599229	5450	-0.500928	1.23214e-08	2.64849e-07
34492	chr14	32029680	32031949	2270	-0.610574	1.26349e-08	2.71249e-07
32382	chr12	101800200	101803549	3350	-0.453224	1.26387e-08	2.71249e-07
40551	chr17	26131900	26136479	4580	0.653215	1.26885e-08	2.71884e-07
17137	chr6	33384350	33388729	4380	-0.565915	1.26915e-08	2.71884e-07
37551	chr15	93424430	93427799	3370	-0.689405	1.26975e-08	2.71884e-07
41915	chr17	74721100	74724849	3750	-0.712501	1.29607e-08	2.77308e-07
42924	chr18	45966650	45969249	2600	0.919179	1.32142e-08	2.82514e-07
45518	chr20	10412950	10417049	4100	-0.550928	1.33066e-08	2.84273e-07
46322	chr20	48727980	48731099	3120	-0.512661	1.33749e-08	2.85513e-07
10670	chr3	123984500	123988299	3800	0.992467	1.35448e-08	2.88917e-07
11548	chr3	184183100	184185829	2730	0.789506	1.35756e-08	2.89254e-07
19280	chr7	6142880	6146449	3570	-0.549281	1.35813e-08	2.89254e-07
31760	chr12	51156030	51159549	3520	-0.540084	1.37422e-08	2.92456e-07
28850	chr11	19616850	19620799	3950	0.740817	1.38481e-08	2.94486e-07
31930	chr12	56726080	56728999	2920	-0.520572	1.39366e-08	2.96142e-07
14481	chr5	66584250	66586399	2150	0.989849	1.39625e-08	2.96467e-07
35493	chr14	94545530	94548879	3350	-0.578378	1.40397e-08	2.9788e-07
48062	chr22	38640050	38644449	4400	0.913452	1.40506e-08	2.97884e-07
41428	chr17	56707600	56710779	3180	-0.579595	1.41871e-08	3.00549e-07
27078	chr10	80310380	80313749	3370	1.04001	1.4205e-08	3.007e-07
42907	chr18	45598050	45601049	3000	0.723703	1.42313e-08	3.01028e-07
8112	chr2	208091050	208094349	3300	0.708489	1.42494e-08	3.01182e-07
45226	chr19	57872000	57876629	4630	-0.68372	1.42911e-08	3.01663e-07
26411	chr10	43900880	43906349	5470	-0.589277	1.42938e-08	3.01663e-07
48387	chr22	45888750	45893899	5150	0.926185	1.43886e-08	3.03435e-07
22738	chr8	99195180	99197379	2200	0.930679	1.44672e-08	3.0486e-07
34081	chr13	103247750	103250999	3250	-0.548352	1.44914e-08	3.0514e-07
47189	chr21	47440700	47443979	3280	0.950581	1.45592e-08	3.06336e-07
7239	chr2	122658380	122662279	3900	0.932418	1.47412e-08	3.09932e-07
5935	chr2	46725950	46728399	2450	-0.665631	1.51677e-08	3.18658e-07
22220	chr8	42658280	42661179	2900	0.757353	1.52863e-08	3.20909e-07
12974	chr4	108744630	108747629	3000	-0.597103	1.53248e-08	3.21319e-07
21805	chr8	22441630	22449899	8270	0.690801	1.53289e-08	3.21319e-07
26056	chr10	22290980	22293949	2970	-0.600679	1.55373e-08	3.25354e-07
2430	chr1	100713980	100716279	2300	-0.615532	1.55447e-08	3.25354e-07
42562	chr18	19178850	19182079	3230	-0.478105	1.55674e-08	3.25584e-07
18374	chr6	139454100	139459599	5500	-0.504962	1.56025e-08	3.26074e-07
44917	chr19	48835080	48837949	2870	-0.589213	1.56399e-08	3.26611e-07
44493	chr19	37807150	37810079	2930	-0.574427	1.56625e-08	3.26838e-07
21367	chr7	158867200	158869449	2250	0.95855	1.57278e-08	3.27955e-07
40534	chr17	25690300	25692849	2550	1.15044	1.57457e-08	3.28081e-07
19327	chr7	7679380	7682149	2770	-0.519407	1.58189e-08	3.29361e-07
30427	chr11	115629350	115632279	2930	0.768726	1.58404e-08	3.29562e-07
19341	chr7	12249430	12252749	3320	-0.545228	1.5909e-08	3.30743e-07
27720	chr10	111724250	111729979	5730	0.722374	1.60914e-08	3.34286e-07
35156	chr14	75400230	75403149	2920	0.620456	1.61383e-08	3.35012e-07
12583	chr4	57300350	57303979	3630	-0.583184	1.61774e-08	3.35573e-07
19044	chr7	607000	610049	3050	0.831516	1.62182e-08	3.36169e-07
37983	chr16	4302100	4304599	2500	-0.606092	1.62687e-08	3.36965e-07
38777	chr16	50277750	50281549	3800	0.919441	1.64767e-08	3.41021e-07
4111	chr1	208398580	208411149	12570	0.683206	1.65019e-08	3.41288e-07
44964	chr19	49491900	49498449	6550	-0.42825	1.66038e-08	3.4314e-07
6564	chr2	86667050	86670499	3450	-0.728802	1.66399e-08	3.43631e-07
19176	chr7	2545400	2552799	7400	0.668438	1.68111e-08	3.46911e-07
44536	chr19	39338350	39344749	6400	-0.411368	1.68449e-08	3.47351e-07
46782	chr21	34695650	34698879	3230	-0.566745	1.68926e-08	3.48077e-07
10583	chr3	120314150	120316529	2380	-0.618327	1.69624e-08	3.49257e-07
39250	chr16	73065980	73067999	2020	0.886058	1.69916e-08	3.49602e-07
20252	chr7	75638850	75642529	3680	0.629427	1.70586e-08	3.50721e-07
29417	chr11	62357700	62361749	4050	-0.477776	1.72174e-08	3.53723e-07
45630	chr20	19786700	19790429	3730	0.687036	1.73062e-08	3.55287e-07
5698	chr2	38976950	38980099	3150	-0.636081	1.73673e-08	3.56279e-07
24872	chr9	124326330	124332279	5950	0.52898	1.74192e-08	3.57081e-07
3736	chr1	193027050	193030199	3150	-0.544083	1.7483e-08	3.58126e-07
27477	chr10	99158950	99162349	3400	-0.768665	1.75375e-08	3.58797e-07
42037	chr17	76784580	76788499	3920	0.68046	1.75415e-08	3.58797e-07
19092	chr7	1114900	1118799	3900	0.766354	1.76666e-08	3.61091e-07
39103	chr16	67976780	67979799	3020	0.66283	1.78018e-08	3.63587e-07
5812	chr2	43331280	43341999	10720	0.615664	1.80539e-08	3.68467e-07
12158	chr4	8351630	8355529	3900	0.680836	1.80952e-08	3.69038e-07
33324	chr13	27997200	28001899	4700	-0.469524	1.81166e-08	3.69205e-07
34336	chr14	20921780	20924979	3200	-0.509087	1.81711e-08	3.70045e-07
34698	chr14	54686000	54688149	2150	1.00259	1.82139e-08	3.70646e-07
36416	chr15	57997400	58000379	2980	-0.568669	1.84679e-08	3.7554e-07
27106	chr10	80723600	80727699	4100	0.7383	1.85433e-08	3.76799e-07
39216	chr16	71517130	71519379	2250	-0.544981	1.86701e-08	3.79073e-07
36657	chr15	66909000	66915329	6330	0.597512	1.86824e-08	3.79073e-07
17506	chr6	43593730	43599979	6250	-0.499016	1.91021e-08	3.87308e-07
11	chr1	761550	769029	7480	-0.48995	1.93793e-08	3.92599e-07
2771	chr1	120276880	120281399	4520	0.611093	1.93913e-08	3.92599e-07
41192	chr17	47290730	47296449	5720	0.661983	1.94392e-08	3.93285e-07
19908	chr7	50727350	50739779	12430	0.385058	1.95545e-08	3.9533e-07
31377	chr12	21809250	21812379	3130	-0.642054	1.96097e-08	3.96158e-07
19480	chr7	28447050	28451279	4230	-0.712995	1.97041e-08	3.97653e-07
47648	chr22	27815350	27818549	3200	0.770302	1.97122e-08	3.97653e-07
34907	chr14	65622430	65624929	2500	0.901333	1.98154e-08	3.99445e-07
42463	chr18	11848780	11852749	3970	-0.567669	1.99729e-08	4.02059e-07
40041	chr17	5388050	5391299	3250	-0.641487	1.99739e-08	4.02059e-07
33635	chr13	44714700	44717699	3000	-0.619568	2.00221e-08	4.02739e-07
33469	chr13	34063900	34066149	2250	0.993446	2.00624e-08	4.03259e-07
17427	chr6	41997230	41999349	2120	0.828521	2.02776e-08	4.07291e-07
5791	chr2	43080650	43084929	4280	0.757872	2.03388e-08	4.08226e-07
45578	chr20	17590780	17596949	6170	0.719185	2.04085e-08	4.0933e-07
27533	chr10	101378650	101383029	4380	-0.609818	2.05343e-08	4.11558e-07
12123	chr4	7841900	7847199	5300	0.777548	2.05572e-08	4.1172e-07
29641	chr11	66737700	66739749	2050	1.25449	2.05828e-08	4.11938e-07
26940	chr10	74854930	74857899	2970	-0.598762	2.06478e-08	4.12941e-07
18015	chr6	110010550	110013779	3230	-0.612174	2.09014e-08	4.17714e-07
595	chr1	16158850	16164199	5350	-0.569017	2.09873e-08	4.19131e-07
24004	chr9	70856080	70858279	2200	-0.649996	2.10506e-08	4.20093e-07
1315	chr1	36105580	36108579	3000	-0.527188	2.11326e-08	4.21428e-07
43933	chr19	13055150	13058029	2880	-0.78884	2.11805e-08	4.22081e-07
10775	chr3	126719200	126723429	4230	0.766317	2.12429e-08	4.23023e-07
14957	chr5	118404830	118408499	3670	-0.539185	2.15283e-08	4.28399e-07
44293	chr19	23868430	23870929	2500	-0.64557	2.18566e-08	4.34621e-07
6739	chr2	98260880	98264049	3170	-0.46914	2.19647e-08	4.3646e-07
40481	chr17	20823930	20826349	2420	1.02679	2.21605e-08	4.40037e-07
9026	chr3	13015500	13018879	3380	0.7518	2.24598e-08	4.45663e-07
2830	chr1	145074650	145076729	2080	0.820394	2.25446e-08	4.47028e-07
35975	chr15	31555150	31559049	3900	0.683733	2.2788e-08	4.51532e-07
38236	chr16	15186150	15189449	3300	-0.581738	2.29098e-08	4.53625e-07
38224	chr16	15011280	15014899	3620	1.19305	2.30362e-08	4.55802e-07
14169	chr5	34563480	34565829	2350	0.913637	2.32538e-08	4.59714e-07
41535	chr17	61817650	61821049	3400	-0.495668	2.32668e-08	4.59714e-07
16986	chr6	30033530	30036299	2770	-0.705258	2.34249e-08	4.62509e-07
32003	chr12	58333880	58336899	3020	-0.57553	2.38559e-08	4.70604e-07
2624	chr1	113930430	113935149	4720	-0.521429	2.38686e-08	4.70604e-07
716	chr1	19695380	19697799	2420	0.871042	2.44139e-08	4.81014e-07
35703	chr14	104162150	104165079	2930	0.750062	2.4463e-08	4.81641e-07
46073	chr20	39992600	39995429	2830	0.93316	2.45976e-08	4.8395e-07
40187	chr17	10025450	10032649	7200	0.604056	2.46667e-08	4.84967e-07
7778	chr2	176865380	176868499	3120	-0.569116	2.49328e-08	4.89854e-07
30018	chr11	77121430	77124649	3220	0.819561	2.53185e-08	4.97081e-07
3910	chr1	203431600	203442799	11200	0.814172	2.54066e-08	4.9846e-07
18400	chr6	141580800	141583779	2980	0.735903	2.54771e-08	4.9927e-07
2973	chr1	150846080	150850779	4700	-0.512626	2.54941e-08	4.9927e-07
34926	chr14	68065600	68068429	2830	-0.567996	2.55017e-08	4.9927e-07
33478	chr13	34391250	34393679	2430	-0.726861	2.57191e-08	5.03174e-07
29377	chr11	61581200	61585929	4730	-0.559857	2.60934e-08	5.1014e-07
19443	chr7	25675350	25679429	4080	0.899523	2.62615e-08	5.13066e-07
24741	chr9	115982280	115985299	3020	-0.557897	2.62879e-08	5.13221e-07
21411	chr8	1893200	1895899	2700	0.98374	2.63799e-08	5.14657e-07
37716	chr15	101687680	101690579	2900	0.850381	2.66183e-08	5.18945e-07
45266	chr19	58788780	58791699	2920	-0.508372	2.66622e-08	5.19438e-07
1616	chr1	46048350	46051649	3300	-0.548541	2.70016e-08	5.25683e-07
34943	chr14	68749330	68753449	4120	0.729209	2.72379e-08	5.29914e-07
7956	chr2	198298400	198301179	2780	-0.630116	2.72737e-08	5.30239e-07
14296	chr5	52094500	52098529	4030	-0.517441	2.73156e-08	5.30685e-07
10308	chr3	75389400	75392049	2650	0.961723	2.74438e-08	5.32803e-07
4399	chr1	226127330	226130829	3500	0.731297	2.76269e-08	5.35617e-07
17073	chr6	31925250	31928199	2950	-0.57894	2.76272e-08	5.35617e-07
9444	chr3	38043680	38048499	4820	0.742774	2.78129e-08	5.38843e-07
34432	chr14	24581950	24585899	3950	-0.578795	2.78729e-08	5.39631e-07
6391	chr2	72076180	72079349	3170	0.96056	2.80648e-08	5.42969e-07
35237	chr14	77347800	77353379	5580	0.579008	2.81247e-08	5.4375e-07
36898	chr15	71996750	72001549	4800	0.663305	2.81745e-08	5.44336e-07
35046	chr14	70232200	70235179	2980	-0.599244	2.82033e-08	5.44514e-07
38929	chr16	57479830	57483529	3700	-0.511166	2.82309e-08	5.44671e-07
11311	chr3	167451350	167454429	3080	-0.654483	2.83396e-08	5.46389e-07
27096	chr10	80560580	80567579	7000	0.594034	2.84544e-08	5.48184e-07
15891	chr5	162863700	162865899	2200	-0.546663	2.84895e-08	5.48184e-07
23906	chr9	38020500	38028579	8080	0.429975	2.84916e-08	5.48184e-07
19047	chr7	629750	631949	2200	1.07758	2.8554e-08	5.49004e-07
31659	chr12	49159330	49163099	3770	0.722328	2.87545e-08	5.5248e-07
10550	chr3	119216350	119218849	2500	-0.451295	2.90161e-08	5.57121e-07
44055	chr19	15946350	15948979	2630	-0.481373	2.92383e-08	5.61001e-07
14332	chr5	54602130	54604949	2820	-0.49564	2.94527e-08	5.64725e-07
34318	chr13	114883450	114889729	6280	0.792849	2.96178e-08	5.67501e-07
38638	chr16	31041950	31046529	4580	-0.484716	3.00582e-08	5.75544e-07
36211	chr15	42839500	42842349	2850	-0.535919	3.05539e-08	5.83746e-07
26959	chr10	75423330	75428749	5420	0.704321	3.05623e-08	5.83746e-07
16884	chr6	26187900	26190249	2350	-0.823951	3.05667e-08	5.83746e-07
15424	chr5	141767800	141771849	4050	0.71392	3.05703e-08	5.83746e-07
1126	chr1	29556250	29558749	2500	-0.650364	3.06008e-08	5.83929e-07
11415	chr3	172467000	172469849	2850	-0.62608	3.07349e-08	5.86086e-07
6606	chr2	87900680	87905179	4500	0.569943	3.14447e-08	5.99211e-07
33437	chr13	32888250	32890649	2400	-0.62555	3.16188e-08	6.01788e-07
40529	chr17	25657650	25662399	4750	-0.535042	3.16371e-08	6.01788e-07
29295	chr11	58344350	58350049	5700	-0.560437	3.16447e-08	6.01788e-07
34977	chr14	69120530	69127649	7120	0.701913	3.18215e-08	6.04739e-07
3472	chr1	173443400	173448199	4800	-0.50135	3.20927e-08	6.09399e-07
5528	chr2	30555200	30559949	4750	0.708135	3.21104e-08	6.09399e-07
12724	chr4	78976400	78981479	5080	-0.579568	3.25208e-08	6.16767e-07
29987	chr11	76154480	76157599	3120	-0.663391	3.2638e-08	6.1857e-07
25058	chr9	130211800	130216579	4780	-0.458312	3.26741e-08	6.18832e-07
23823	chr9	35160550	35163499	2950	-0.673199	3.30154e-08	6.24872e-07
10832	chr3	128111430	128117499	6070	0.714365	3.31992e-08	6.27924e-07
44643	chr19	42578450	42581879	3430	-0.559037	3.3276e-08	6.28579e-07
36079	chr15	39463980	39466029	2050	0.803891	3.32969e-08	6.28579e-07
48245	chr22	42760130	42765229	5100	0.806724	3.33015e-08	6.28579e-07
21645	chr8	17452280	17454329	2050	0.927672	3.34196e-08	6.30122e-07
41306	chr17	49030450	49034729	4280	0.646222	3.34284e-08	6.30122e-07
40951	chr17	40984080	40986929	2850	-0.51184	3.359e-08	6.3274e-07
45774	chr20	25845350	25850079	4730	0.794475	3.36709e-08	6.33837e-07
19807	chr7	45684880	45687729	2850	0.913604	3.38723e-08	6.37197e-07
35162	chr14	75443600	75448449	4850	0.904903	3.40603e-08	6.40302e-07
10028	chr3	58370680	58374679	4000	0.793396	3.42611e-08	6.43642e-07
45205	chr19	56824500	56828079	3580	-0.520199	3.43619e-08	6.45102e-07
18429	chr6	144415380	144418329	2950	-0.56183	3.44404e-08	6.4614e-07
46865	chr21	37526950	37530849	3900	-0.626167	3.45552e-08	6.47858e-07
46257	chr20	47536730	47539929	3200	-0.546849	3.48318e-08	6.52194e-07
29996	chr11	76347150	76351829	4680	0.604995	3.48503e-08	6.52194e-07
45837	chr20	31251750	31254379	2630	0.714174	3.48567e-08	6.52194e-07
29376	chr11	61558680	61561429	2750	-0.45502	3.49097e-08	6.52748e-07
915	chr1	25059150	25064199	5050	0.527324	3.49643e-08	6.53332e-07
29246	chr11	48085000	48087199	2200	0.824779	3.49933e-08	6.53434e-07
8602	chr2	238163930	238166379	2450	0.893417	3.52625e-08	6.58021e-07
20514	chr7	100208100	100211449	3350	-0.557178	3.53162e-08	6.58583e-07
34611	chr14	50051830	50054449	2620	-0.621822	3.54781e-08	6.61158e-07
16496	chr6	6712200	6718099	5900	0.635914	3.56794e-08	6.64467e-07
26816	chr10	72236950	72244299	7350	0.49934	3.6207e-08	6.73842e-07
36353	chr15	52309980	52313249	3270	-0.566295	3.62978e-08	6.75081e-07
26544	chr10	49811050	49813899	2850	0.843341	3.64259e-08	6.77011e-07
44782	chr19	46070550	46083599	13050	-0.600417	3.65117e-08	6.78154e-07
46721	chr21	30444450	30447499	3050	-0.525527	3.65947e-08	6.79244e-07
46651	chr21	15754080	15757149	3070	-0.709927	3.67553e-08	6.8177e-07
31715	chr12	50199350	50204529	5180	0.529253	3.70409e-08	6.86481e-07
31976	chr12	57909800	57918399	8600	-0.470041	3.70585e-08	6.86481e-07
35231	chr14	77245530	77251699	6170	0.715552	3.71021e-08	6.86832e-07
40396	chr17	18083980	18090199	6220	-0.433549	3.72596e-08	6.8929e-07
6997	chr2	109877900	109886549	8650	0.56504	3.73546e-08	6.90589e-07
31396	chr12	25536980	25540829	3850	-0.622656	3.77477e-08	6.97395e-07
7015	chr2	110270350	110273349	3000	0.949866	3.78044e-08	6.97979e-07
39703	chr16	89306150	89309099	2950	-0.509236	3.79397e-08	7.00013e-07
47516	chr22	24575000	24579649	4650	0.726557	3.80406e-08	7.01412e-07
11554	chr3	184309700	184313199	3500	0.877836	3.81639e-08	7.03219e-07
26086	chr10	23726300	23730449	4150	-0.558522	3.82739e-08	7.04781e-07
26820	chr10	72268030	72273529	5500	0.482342	3.87852e-08	7.13724e-07
26209	chr10	30326900	30333549	6650	0.593424	3.88751e-08	7.14907e-07
13287	chr4	146018080	146020999	2920	-0.653095	3.89403e-08	7.15634e-07
34993	chr14	69272350	69276549	4200	0.663008	3.96008e-08	7.27091e-07
14651	chr5	77589180	77592449	3270	-0.49366	3.96159e-08	7.27091e-07
2990	chr1	151252950	151256879	3930	-0.544595	3.97739e-08	7.29405e-07
10978	chr3	134043450	134047429	3980	0.678815	3.98149e-08	7.29405e-07
18961	chr6	169589230	169592929	3700	0.945838	3.98205e-08	7.29405e-07
15052	chr5	131131150	131135329	4180	-0.506682	3.99208e-08	7.30763e-07
15357	chr5	140699030	140701929	2900	-0.735572	4.00921e-08	7.33303e-07
22901	chr8	117777100	117780179	3080	-0.645509	4.01122e-08	7.33303e-07
29874	chr11	72967680	72970729	3050	0.753176	4.02208e-08	7.34807e-07
651	chr1	17085480	17088979	3500	0.917722	4.11835e-08	7.51903e-07
47533	chr22	24839500	24843149	3650	0.76098	4.13968e-08	7.55301e-07
3554	chr1	179849150	179853299	4150	-0.474107	4.16188e-08	7.58857e-07
5437	chr2	27711480	27713799	2320	-0.724381	4.17883e-08	7.61448e-07
20343	chr7	86780400	86783579	3180	-0.566336	4.2052e-08	7.65753e-07
12831	chr4	88535380	88538699	3320	0.940784	4.21171e-08	7.66439e-07
6610	chr2	87978450	87984849	6400	0.639612	4.23187e-08	7.69604e-07
25519	chr9	139386400	139389749	3350	0.866145	4.2571e-08	7.73688e-07
19651	chr7	36081630	36089949	8320	0.658235	4.26811e-08	7.75183e-07
1103	chr1	28831050	28834379	3330	-0.465345	4.34523e-08	7.88676e-07
47395	chr22	21354800	21358429	3630	-0.472586	4.36582e-08	7.91898e-07
4898	chr1	249199000	249202449	3450	-0.561241	4.38608e-08	7.95056e-07
8862	chr3	8602950	8605229	2280	0.842474	4.40047e-08	7.97145e-07
38610	chr16	30660480	30664349	3870	-0.416248	4.41316e-08	7.98925e-07
30212	chr11	96121800	96124649	2850	-0.517021	4.42464e-08	8.00484e-07
3589	chr1	181070230	181072299	2070	0.859574	4.43145e-08	8.01196e-07
32131	chr12	72055950	72059449	3500	-0.540591	4.44125e-08	8.02212e-07
4752	chr1	236957780	236962149	4370	-0.624723	4.44282e-08	8.02212e-07
29155	chr11	46258150	46262349	4200	-0.605689	4.4514e-08	8.03241e-07
2519	chr1	110363230	110367949	4720	0.739157	4.48237e-08	8.08306e-07
19625	chr7	35288000	35290479	2480	0.701968	4.49293e-08	8.09608e-07
22728	chr8	98955230	98957499	2270	0.813817	4.4954e-08	8.09608e-07
19440	chr7	25652750	25656479	3730	0.879219	4.51055e-08	8.11537e-07
5025	chr2	8678280	8682099	3820	0.608872	4.51194e-08	8.11537e-07
13550	chr4	169687900	169691599	3700	0.837439	4.5394e-08	8.15951e-07
34605	chr14	45602280	45606479	4200	-0.509575	4.55442e-08	8.18123e-07
32203	chr12	92537000	92541279	4280	-0.478517	4.5782e-08	8.21866e-07
21172	chr7	148683750	148685899	2150	-0.673357	4.58217e-08	8.22048e-07
12952	chr4	103746480	103752849	6370	-0.487905	4.64672e-08	8.33093e-07
34391	chr14	23397230	23401079	3850	-0.548529	4.65416e-08	8.3389e-07
24228	chr9	91432800	91434899	2100	0.868297	4.68777e-08	8.39372e-07
35132	chr14	74415650	74418379	2730	-0.617868	4.74389e-08	8.48698e-07
11565	chr3	184431750	184436329	4580	0.736572	4.7482e-08	8.48698e-07
7670	chr2	170696080	170698329	2250	0.696354	4.74898e-08	8.48698e-07
18461	chr6	148612650	148615529	2880	0.828759	4.76559e-08	8.5112e-07
10913	chr3	129271180	129286649	15470	0.620445	4.7741e-08	8.52095e-07
16255	chr5	179048480	179052829	4350	-0.425739	4.79386e-08	8.55074e-07
5051	chr2	9364980	9372649	7670	0.599186	4.80306e-08	8.55671e-07
27908	chr10	118445850	118452999	7150	0.497017	4.80335e-08	8.55671e-07
15976	chr5	170950380	170952499	2120	0.963273	4.81542e-08	8.57275e-07
31388	chr12	22776650	22779849	3200	-0.542669	4.8215e-08	8.57809e-07
20464	chr7	99101100	99104149	3050	-0.516967	4.85915e-08	8.63956e-07
12124	chr4	7871830	7874199	2370	1.08766	4.88408e-08	8.67621e-07
7922	chr2	192541250	192544379	3130	-0.559929	4.8895e-08	8.67621e-07
19122	chr7	1763500	1767379	3880	-0.716156	4.89096e-08	8.67621e-07
46638	chr21	9908350	9911929	3580	0.918432	4.89221e-08	8.67621e-07
45633	chr20	19829030	19833599	4570	0.73868	4.90157e-08	8.68727e-07
10508	chr3	113774080	113776949	2870	-0.587724	4.90822e-08	8.69353e-07
16193	chr5	176962180	176967029	4850	0.557947	4.91632e-08	8.70235e-07
34728	chr14	55492850	55495279	2430	-0.630323	4.92052e-08	8.70426e-07
19782	chr7	44688950	44696229	7280	-0.789068	4.93007e-08	8.71562e-07
7579	chr2	161439450	161442549	3100	0.737853	4.94045e-08	8.72639e-07
32824	chr12	120753950	120756199	2250	-0.677796	4.94242e-08	8.72639e-07
1884	chr1	59010880	59013199	2320	-0.612394	4.9561e-08	8.745e-07
8448	chr2	232376900	232380529	3630	-0.606849	4.96656e-08	8.75792e-07
46854	chr21	37222050	37224179	2130	0.94856	5.00346e-08	8.81741e-07
46834	chr21	35960950	35969199	8250	0.469823	5.06584e-08	8.9217e-07
25216	chr9	132387680	132390199	2520	-0.562594	5.12386e-08	9.01819e-07
19867	chr7	47606980	47625099	18120	0.430954	5.15371e-08	9.06501e-07
9400	chr3	37562400	37564499	2100	0.834567	5.16168e-08	9.0733e-07
16934	chr6	27830950	27836499	5550	-0.605783	5.16576e-08	9.07475e-07
35697	chr14	104041500	104044549	3050	0.710952	5.16906e-08	9.07483e-07
17628	chr6	49429650	49431999	2350	-0.751372	5.21608e-08	9.15162e-07
19886	chr7	48127130	48130799	3670	-0.543641	5.26954e-08	9.23958e-07
4423	chr1	226789150	226794429	5280	0.687352	5.316e-08	9.3152e-07
44437	chr19	36118430	36121349	2920	-0.553616	5.36349e-08	9.39251e-07
42566	chr18	19282730	19286099	3370	-0.568136	5.40464e-08	9.45862e-07
36581	chr15	64384480	64390449	5970	-0.570443	5.41247e-08	9.46154e-07
12117	chr4	7811230	7814399	3170	0.879179	5.41309e-08	9.46154e-07
24961	chr9	127543880	127548799	4920	0.671965	5.44872e-08	9.51785e-07
15636	chr5	149554650	149564799	10150	0.648313	5.46596e-08	9.54198e-07
6526	chr2	85959050	85962779	3730	0.775117	5.47258e-08	9.54757e-07
41454	chr17	57641630	57644249	2620	-0.651995	5.49519e-08	9.58101e-07
5918	chr2	46422680	46430549	7870	0.55865	5.50435e-08	9.59098e-07
20679	chr7	107203000	107205699	2700	-0.589984	5.56956e-08	9.69854e-07
8417	chr2	231524100	231526199	2100	0.96685	5.58277e-08	9.71549e-07
27095	chr10	80533930	80541999	8070	0.608745	5.59464e-08	9.73007e-07
12090	chr4	7068080	7071879	3800	-0.584535	5.60138e-08	9.73571e-07
43996	chr19	14357500	14360879	3380	0.851405	5.62865e-08	9.77701e-07
34887	chr14	65223400	65232579	9180	0.564618	5.63335e-08	9.7791e-07
3718	chr1	185124630	185127679	3050	-0.50492	5.65236e-08	9.80598e-07
11920	chr4	491630	494329	2700	-0.55674	5.66099e-08	9.81484e-07
33726	chr13	48876500	48879649	3150	-0.588489	5.74051e-08	9.94653e-07
8178	chr2	217496630	217503799	7170	0.516686	5.80401e-08	1.00503e-06
35953	chr15	30402100	30404599	2500	1.08056	5.86779e-08	1.01544e-06
1358	chr1	38323880	38326879	3000	-0.488254	5.89513e-08	1.01954e-06
27608	chr10	104152580	104156949	4370	-0.586428	5.90589e-08	1.02077e-06
29512	chr11	64427180	64429699	2520	0.895009	5.91113e-08	1.02104e-06
19869	chr7	47648980	47651679	2700	0.761329	5.9747e-08	1.03139e-06
46118	chr20	43149200	43151549	2350	-0.577204	5.98384e-08	1.03232e-06
19210	chr7	4651000	4654699	3700	0.708171	6.00714e-08	1.0357e-06
8247	chr2	218733030	218736899	3870	0.700823	6.01697e-08	1.03676e-06
31307	chr12	14955050	14957429	2380	-0.75367	6.03937e-08	1.03997e-06
10754	chr3	126192250	126196449	4200	-0.530652	6.07533e-08	1.04552e-06
3274	chr1	161733850	161737479	3630	-0.552051	6.10356e-08	1.04973e-06
40493	chr17	21102450	21106599	4150	0.769165	6.12245e-08	1.05233e-06
23590	chr9	6680080	6683099	3020	-0.479577	6.19142e-08	1.06299e-06
3651	chr1	183576250	183580329	4080	0.753784	6.1921e-08	1.06299e-06
33442	chr13	33158950	33162899	3950	-0.539895	6.21378e-08	1.06476e-06
22121	chr8	38421800	38424599	2800	0.870014	6.21503e-08	1.06476e-06
13593	chr4	174253600	174257599	4000	-0.60272	6.21711e-08	1.06476e-06
45076	chr19	52641080	52645049	3970	-0.504078	6.21768e-08	1.06476e-06
30873	chr12	497130	500049	2920	-0.6397	6.22378e-08	1.06515e-06
31165	chr12	7060650	7064329	3680	0.787802	6.23612e-08	1.06639e-06
822	chr1	22350450	22354079	3630	-0.570284	6.23869e-08	1.06639e-06
16903	chr6	26536350	26539899	3550	-0.502817	6.26408e-08	1.07007e-06
30170	chr11	94225650	94228449	2800	-0.590968	6.28926e-08	1.07372e-06
47073	chr21	45121430	45124149	2720	-0.691789	6.33229e-08	1.0804e-06
2604	chr1	113160380	113163799	3420	-0.502131	6.39982e-08	1.09077e-06
468	chr1	11859550	11867629	8080	-0.457465	6.40089e-08	1.09077e-06
12463	chr4	44679180	44681779	2600	-0.524081	6.44021e-08	1.0968e-06
7689	chr2	172777530	172780999	3470	-0.58743	6.44822e-08	1.0975e-06
7185	chr2	121352800	121356779	3980	0.844706	6.46099e-08	1.099e-06
38765	chr16	49860500	49863849	3350	0.8185	6.47272e-08	1.10032e-06
6373	chr2	71801650	71808229	6580	0.856091	6.49143e-08	1.10229e-06
26243	chr10	31319030	31322999	3970	-0.496064	6.49222e-08	1.10229e-06
45437	chr20	4905700	4908729	3030	0.819615	6.50501e-08	1.10379e-06
7113	chr2	114354200	114358879	4680	0.665655	6.51157e-08	1.10423e-06
45140	chr19	54703200	54706499	3300	-0.488313	6.52302e-08	1.1055e-06
16183	chr5	176851700	176855349	3650	-0.450727	6.53274e-08	1.10648e-06
7401	chr2	135674330	135677879	3550	-0.43975	6.53764e-08	1.10664e-06
3962	chr1	204378780	204382779	4000	-0.456068	6.5783e-08	1.11284e-06
22217	chr8	42573450	42577429	3980	0.855135	6.58863e-08	1.11391e-06
29101	chr11	44831350	44841849	10500	0.539711	6.59438e-08	1.11421e-06
24324	chr9	95508550	95513249	4700	0.58839	6.63754e-08	1.12068e-06
18507	chr6	150069480	150073329	3850	-0.479225	6.6407e-08	1.12068e-06
45722	chr20	23620900	23624249	3350	0.884753	6.675e-08	1.12579e-06
45046	chr19	51306900	51309549	2650	-0.512705	6.69946e-08	1.12923e-06
40668	chr17	30069730	30074699	4970	0.605195	6.75292e-08	1.13681e-06
47517	chr22	24584180	24588649	4470	0.783632	6.75373e-08	1.13681e-06
32822	chr12	120727880	120731429	3550	-0.7248	6.75668e-08	1.13681e-06
46737	chr21	33031100	33033799	2700	-0.67523	6.7742e-08	1.13907e-06
35266	chr14	77785930	77789179	3250	-0.60457	6.79264e-08	1.14147e-06
36101	chr15	40329930	40332979	3050	-0.46404	6.79667e-08	1.14147e-06
32481	chr12	107347830	107351429	3600	-0.583402	6.84477e-08	1.14886e-06
11160	chr3	149272900	149274929	2030	0.941392	7.01249e-08	1.17622e-06
46408	chr20	51588680	51591199	2520	0.854239	7.01624e-08	1.17622e-06
29225	chr11	47606930	47609979	3050	0.847181	7.02605e-08	1.17716e-06
24308	chr9	95268330	95271429	3100	0.874656	7.13892e-08	1.19526e-06
17660	chr6	53222730	53225779	3050	-0.62747	7.14269e-08	1.19526e-06
39256	chr16	73155550	73159549	4000	0.738623	7.1612e-08	1.19764e-06
43773	chr19	9648030	9650549	2520	-0.483782	7.23626e-08	1.20947e-06
34986	chr14	69202330	69205849	3520	0.744023	7.24216e-08	1.20973e-06
24556	chr9	104294700	104297349	2650	-0.611483	7.25147e-08	1.21056e-06
1039	chr1	27442950	27447749	4800	0.74225	7.26404e-08	1.21193e-06
17943	chr6	106772150	106775279	3130	-0.632889	7.29866e-08	1.21698e-06
20179	chr7	73912350	73917899	5550	-0.707679	7.30605e-08	1.21749e-06
490	chr1	12201000	12204999	4000	0.709575	7.31739e-08	1.21865e-06
3206	chr1	157970450	157973429	2980	0.770069	7.39332e-08	1.23056e-06
44523	chr19	38826000	38828349	2350	-0.584647	7.41445e-08	1.23334e-06
4069	chr1	207493500	207496529	3030	-0.481743	7.58968e-08	1.26173e-06
28616	chr11	11168050	11171779	3730	0.664222	7.63021e-08	1.26772e-06
12600	chr4	57917650	57924049	6400	0.657848	7.70132e-08	1.27877e-06
17793	chr6	79942250	79945479	3230	-0.630243	7.73564e-08	1.2837e-06
20373	chr7	92156280	92159349	3070	-0.627137	7.7418e-08	1.28396e-06
27202	chr10	88112650	88116749	4100	0.794181	7.75631e-08	1.2856e-06
34961	chr14	68983880	68991279	7400	0.645493	7.77992e-08	1.28875e-06
24519	chr9	101732780	101741349	8570	0.576868	7.79639e-08	1.29071e-06
34342	chr14	21148330	21154079	5750	-0.555155	7.90666e-08	1.30819e-06
7811	chr2	179314350	179317499	3150	-0.524495	7.94676e-08	1.31404e-06
37999	chr16	4474200	4477299	3100	-0.494687	7.99977e-08	1.32094e-06
19794	chr7	44923000	44926629	3630	-0.559408	8.00014e-08	1.32094e-06
10797	chr3	127471700	127473999	2300	0.856903	8.00269e-08	1.32094e-06
701	chr1	19264000	19266749	2750	0.925842	8.03336e-08	1.32522e-06
22398	chr8	62625580	62628749	3170	-0.660301	8.05999e-08	1.32883e-06
48053	chr22	38576000	38579479	3480	-0.508066	8.10377e-08	1.33525e-06
39074	chr16	67489730	67495249	5520	0.542574	8.14294e-08	1.34092e-06
43171	chr18	59852680	59855979	3300	-0.512316	8.18099e-08	1.34639e-06
30676	chr11	125083030	125086429	3400	0.675637	8.2535e-08	1.35752e-06
16036	chr5	172021500	172026429	4930	0.649829	8.2669e-08	1.35878e-06
25952	chr10	14994700	14997129	2430	-0.528458	8.27571e-08	1.35878e-06
1161	chr1	31768280	31771229	2950	-0.50231	8.27578e-08	1.35878e-06
6230	chr2	65295780	65299029	3250	0.562597	8.29301e-08	1.36081e-06
45267	chr19	58815630	58818179	2550	-0.59508	8.31151e-08	1.36304e-06
33546	chr13	40843950	40846979	3030	0.781753	8.36523e-08	1.37104e-06
26604	chr10	52264600	52268799	4200	0.761087	8.38868e-08	1.37408e-06
38780	chr16	50298850	50301979	3130	0.9366	8.42525e-08	1.37926e-06
3967	chr1	204423900	204438849	14950	0.432953	8.4482e-08	1.3822e-06
39481	chr16	84917430	84919999	2570	0.70196	8.45345e-08	1.38225e-06
42913	chr18	45690830	45696699	5870	0.677198	8.46903e-08	1.38399e-06
22742	chr8	99375550	99378299	2750	0.825251	8.51945e-08	1.39141e-06
29211	chr11	47446450	47449699	3250	-0.441706	8.5575e-08	1.39681e-06
31409	chr12	26392600	26394629	2030	1.05536	8.59873e-08	1.40271e-06
37655	chr15	99947100	99951829	4730	0.53719	8.61103e-08	1.4039e-06
2745	chr1	117529630	117532999	3370	0.824574	8.66263e-08	1.41149e-06
1110	chr1	28973400	28976879	3480	-0.552339	8.70052e-08	1.41683e-06
6802	chr2	100326400	100328699	2300	0.916047	8.70953e-08	1.41747e-06
42270	chr18	266650	270249	3600	-0.462105	8.8826e-08	1.4448e-06
27828	chr10	115437550	115441349	3800	-0.471128	8.92264e-08	1.45046e-06
2743	chr1	117513650	117516799	3150	0.797879	8.97e-08	1.45731e-06
29017	chr11	35545200	35548429	3230	0.702817	8.98127e-08	1.45829e-06
5765	chr2	42250400	42253799	3400	0.704443	9.00152e-08	1.46073e-06
23873	chr9	36256780	36259979	3200	-0.540537	9.03512e-08	1.46533e-06
23616	chr9	13511800	13515349	3550	0.673379	9.12105e-08	1.47841e-06
35431	chr14	93052730	93054979	2250	0.98967	9.20811e-08	1.49092e-06
5962	chr2	47140180	47144629	4450	-0.445774	9.20898e-08	1.49092e-06
12233	chr4	15681950	15684679	2730	-0.574864	9.215e-08	1.49103e-06
8593	chr2	238062950	238066799	3850	0.808611	9.37933e-08	1.51674e-06
23793	chr9	34328030	34331249	3220	-0.487751	9.42199e-08	1.52276e-06
43632	chr19	5125150	5130729	5580	0.757856	9.54386e-08	1.54156e-06
34310	chr13	114790650	114792879	2230	1.04276	9.56885e-08	1.5447e-06
31104	chr12	6323050	6325749	2700	0.877431	9.61446e-08	1.55117e-06
4595	chr1	231662780	231667049	4270	-0.437643	9.63905e-08	1.55423e-06
34621	chr14	50333600	50336349	2750	-0.605025	9.68068e-08	1.55982e-06
47903	chr22	35699580	35713649	14070	-0.514557	9.6849e-08	1.55982e-06
31599	chr12	46763900	46768329	4430	-0.402153	9.74072e-08	1.56791e-06
15258	chr5	138281980	138292529	10550	0.444441	9.87454e-08	1.58853e-06
6809	chr2	100719530	100723079	3550	0.744508	9.89917e-08	1.59157e-06
27135	chr10	81178200	81186949	8750	0.560772	9.91478e-08	1.59317e-06
3474	chr1	173792080	173795229	3150	-0.555175	1.00134e-07	1.60808e-06
17229	chr6	35225630	35229329	3700	-0.598812	1.00219e-07	1.60852e-06
4578	chr1	230992300	230995299	3000	0.699551	1.00502e-07	1.61152e-06
15276	chr5	138718480	138721979	3500	0.711434	1.00521e-07	1.61152e-06
518	chr1	12606000	12618249	12250	0.478466	1.00985e-07	1.61802e-06
28476	chr11	6631800	6634999	3200	-0.48818	1.01156e-07	1.61983e-06
6609	chr2	87972850	87977799	4950	0.632656	1.02013e-07	1.63262e-06
11561	chr3	184395630	184398199	2570	0.776683	1.02091e-07	1.63293e-06
39026	chr16	66405530	66409299	3770	0.828051	1.02388e-07	1.63674e-06
38291	chr16	18442700	18444729	2030	1.32178	1.02467e-07	1.63707e-06
24457	chr9	99415300	99418999	3700	-0.536597	1.03231e-07	1.64833e-06
14089	chr5	21491580	21497679	6100	0.794542	1.03993e-07	1.65954e-06
45615	chr20	18773800	18775979	2180	-0.639844	1.04439e-07	1.6657e-06
35427	chr14	92975600	92982599	7000	0.558784	1.04631e-07	1.66782e-06
3553	chr1	179845400	179847779	2380	-0.708119	1.04692e-07	1.66784e-06
5762	chr2	42190050	42195979	5930	0.742451	1.05299e-07	1.67655e-06
45287	chr19	59082800	59088499	5700	-0.461736	1.05749e-07	1.68275e-06
18163	chr6	121654600	121657079	2480	-0.64239	1.05876e-07	1.6838e-06
2468	chr1	109617430	109620349	2920	-0.583284	1.06568e-07	1.69384e-06
1751	chr1	53610750	53613279	2530	0.870974	1.07078e-07	1.70099e-06
3986	chr1	205217150	205219749	2600	0.926577	1.0758e-07	1.70798e-06
3179	chr1	156424850	156428749	3900	-0.515422	1.07786e-07	1.71029e-06
3739	chr1	193089750	193092779	3030	-0.52854	1.07851e-07	1.71034e-06
37996	chr16	4441230	4444379	3150	0.846375	1.0844e-07	1.71871e-06
16983	chr6	29941900	29946149	4250	-0.489472	1.08854e-07	1.72428e-06
37087	chr15	77824630	77826749	2120	1.02785	1.09369e-07	1.73146e-06
45387	chr20	3386200	3391129	4930	-0.505099	1.10118e-07	1.74233e-06
3902	chr1	203317830	203321749	3920	0.820592	1.10285e-07	1.74396e-06
27273	chr10	91128050	91130129	2080	0.884833	1.10346e-07	1.74396e-06
12807	chr4	87854650	87858079	3430	-0.542621	1.10545e-07	1.74611e-06
40500	chr17	21184500	21195279	10780	-0.374226	1.10973e-07	1.75188e-06
26500	chr10	46960450	46966629	6180	0.657136	1.11251e-07	1.75527e-06
41151	chr17	45399930	45403049	3120	-0.571686	1.11667e-07	1.76084e-06
47143	chr21	46449030	46455929	6900	0.742883	1.12233e-07	1.76876e-06
22026	chr8	30080250	30084249	4000	0.740387	1.12785e-07	1.77606e-06
913	chr1	25050100	25055449	5350	0.582236	1.12823e-07	1.77606e-06
13317	chr4	148603800	148606729	2930	-0.684111	1.12903e-07	1.77631e-06
31081	chr12	5614680	5616799	2120	0.860876	1.13186e-07	1.77975e-06
36143	chr15	41184880	41188299	3420	-0.495632	1.13249e-07	1.77975e-06
3899	chr1	203284580	203287529	2950	0.829824	1.13509e-07	1.78282e-06
35710	chr14	104200630	104203979	3350	0.664794	1.13617e-07	1.78352e-06
9230	chr3	23652780	23654899	2120	0.825405	1.1393e-07	1.78742e-06
32377	chr12	100659530	100662599	3070	-0.53782	1.14353e-07	1.79305e-06
39642	chr16	88124380	88127149	2770	0.854934	1.1472e-07	1.79689e-06
40558	chr17	26660980	26664779	3800	-0.434999	1.14773e-07	1.79689e-06
7092	chr2	113340700	113343879	3180	-0.500885	1.14791e-07	1.79689e-06
33274	chr13	24331300	24334999	3700	0.902226	1.15372e-07	1.80497e-06
14673	chr5	78279200	78282599	3400	-0.622232	1.16566e-07	1.82262e-06
25126	chr9	130976130	130981629	5500	0.716862	1.18532e-07	1.8517e-06
48485	chr22	50025200	50027949	2750	0.849638	1.18558e-07	1.8517e-06
43636	chr19	5307730	5309979	2250	1.1199	1.19699e-07	1.86847e-06
42749	chr18	33037750	33043729	5980	0.497885	1.20617e-07	1.88174e-06
19283	chr7	6210450	6213649	3200	0.68235	1.20715e-07	1.88222e-06
25380	chr9	136390980	136395429	4450	0.814682	1.20889e-07	1.88388e-06
31680	chr12	49607380	49610499	3120	0.698352	1.20991e-07	1.88442e-06
2826	chr1	145022000	145024579	2580	0.629249	1.21336e-07	1.8883e-06
37024	chr15	75467430	75472449	5020	0.671468	1.21376e-07	1.8883e-06
9548	chr3	42640730	42643729	3000	-0.476765	1.22408e-07	1.9033e-06
8964	chr3	11594100	11598799	4700	0.529978	1.22605e-07	1.90529e-06
16817	chr6	20179700	20184629	4930	-0.662879	1.23164e-07	1.91292e-06
48534	chr22	51122500	51125899	3400	0.717178	1.23254e-07	1.91325e-06
3383	chr1	167615500	167625929	10430	0.456198	1.23632e-07	1.91805e-06
21693	chr8	18940900	18943779	2880	0.80215	1.24648e-07	1.93273e-06
22256	chr8	49308980	49312529	3550	0.678045	1.24734e-07	1.933e-06
34767	chr14	58763380	58767699	4320	-0.553458	1.25364e-07	1.94168e-06
8558	chr2	237249150	237252399	3250	0.756138	1.25566e-07	1.94373e-06
44828	chr19	46989700	46991929	2230	0.879725	1.26093e-07	1.9508e-06
24915	chr9	124887200	124898199	11000	0.521944	1.26544e-07	1.95669e-06
20200	chr7	74305130	74308249	3120	-0.870079	1.26671e-07	1.95758e-06
3110	chr1	154907980	154913029	5050	-0.476231	1.2676e-07	1.95786e-06
48142	chr22	40439250	40442729	3480	-0.704868	1.27156e-07	1.96289e-06
20156	chr7	73440600	73446299	5700	0.762965	1.27424e-07	1.96594e-06
28070	chr10	126299780	126303829	4050	0.786026	1.27611e-07	1.96774e-06
48132	chr22	39896030	39900049	4020	-0.498993	1.27759e-07	1.96893e-06
34362	chr14	21943750	21946779	3030	-0.55464	1.28362e-07	1.97713e-06
31143	chr12	6796900	6799599	2700	-0.540685	1.28707e-07	1.98134e-06
28896	chr11	22645550	22648649	3100	-0.572268	1.29693e-07	1.99543e-06
17216	chr6	35030750	35034329	3580	0.558929	1.29854e-07	1.9968e-06
40065	chr17	7182630	7188829	6200	-0.540398	1.29981e-07	1.99766e-06
36794	chr15	69753700	69756679	2980	-0.466055	1.30161e-07	1.99851e-06
28028	chr10	124044380	124049099	4720	0.827026	1.3018e-07	1.99851e-06
23581	chr9	6014680	6016999	2320	-0.612839	1.30318e-07	1.99953e-06
10499	chr3	112979000	112981129	2130	1.05927	1.30543e-07	2.00187e-06
45072	chr19	52510180	52512799	2620	-0.498764	1.31649e-07	2.01773e-06
14555	chr5	70314200	70316249	2050	0.914404	1.32656e-07	2.03204e-06
42426	chr18	9830700	9832799	2100	0.847281	1.33928e-07	2.05041e-06
37385	chr15	89629850	89635279	5430	-0.500529	1.34177e-07	2.05309e-06
31171	chr12	7124530	7127149	2620	-0.615008	1.35271e-07	2.06868e-06
19774	chr7	44620280	44623479	3200	-0.426676	1.37467e-07	2.10112e-06
28167	chr10	131906830	131910899	4070	-0.54074	1.38386e-07	2.114e-06
45595	chr20	17849800	17852199	2400	0.894143	1.38495e-07	2.11452e-06
21496	chr8	9003700	9013429	9730	-0.411744	1.40288e-07	2.14071e-06
5805	chr2	43258000	43261729	3730	0.680709	1.41149e-07	2.15207e-06
32427	chr12	105113180	105116099	2920	0.655692	1.41186e-07	2.15207e-06
7269	chr2	128333200	128335879	2680	0.810089	1.41555e-07	2.15652e-06
34363	chr14	21978080	21980979	2900	-0.502343	1.425e-07	2.16971e-06
46268	chr20	48002700	48005949	3250	0.771245	1.43064e-07	2.17712e-06
22869	chr8	104425980	104428899	2920	-0.549319	1.43338e-07	2.17938e-06
31628	chr12	48138350	48142399	4050	0.808052	1.43369e-07	2.17938e-06
21961	chr8	27628700	27631349	2650	-0.542103	1.44108e-07	2.18942e-06
39069	chr16	67334350	67336499	2150	0.979747	1.44395e-07	2.19259e-06
48045	chr22	38452000	38454579	2580	-0.530803	1.4612e-07	2.21758e-06
7280	chr2	128567480	128570199	2720	-0.580508	1.47052e-07	2.23051e-06
48188	chr22	41680200	41683849	3650	-0.513757	1.47581e-07	2.23731e-06
12919	chr4	99848700	99851979	3280	-0.483969	1.48035e-07	2.24297e-06
16398	chr6	3805600	3808399	2800	0.751323	1.48314e-07	2.24598e-06
37931	chr16	3312400	3315979	3580	-0.478777	1.49635e-07	2.26475e-06
10557	chr3	119353530	119358729	5200	-0.609688	1.4995e-07	2.26828e-06
46930	chr21	40277700	40280129	2430	-0.560731	1.50849e-07	2.28065e-06
40786	chr17	37035730	37042429	6700	0.591973	1.52984e-07	2.31168e-06
35183	chr14	75759530	75763829	4300	-0.511483	1.53687e-07	2.32104e-06
13105	chr4	122721000	122723749	2750	-0.634439	1.55238e-07	2.3432e-06
10493	chr3	112708930	112711149	2220	-0.580781	1.56516e-07	2.3612e-06
30592	chr11	121161980	121164849	2870	-0.705833	1.57072e-07	2.36733e-06
19742	chr7	44125900	44129929	4030	0.843757	1.5714e-07	2.36733e-06
35159	chr14	75417230	75419829	2600	0.831478	1.57176e-07	2.36733e-06
7712	chr2	173418630	173422099	3470	-0.689676	1.57728e-07	2.37435e-06
44023	chr19	15232980	15237379	4400	-0.573727	1.58567e-07	2.38569e-06
17765	chr6	74362000	74365349	3350	-0.57167	1.59151e-07	2.3926e-06
36453	chr15	59224150	59227379	3230	-0.606359	1.59198e-07	2.3926e-06
1241	chr1	33500930	33503649	2720	-0.557959	1.60105e-07	2.40495e-06
40117	chr17	8041780	8044299	2520	-0.697811	1.61525e-07	2.42392e-06
1133	chr1	30555580	30559099	3520	0.763293	1.61578e-07	2.42392e-06
3347	chr1	165598700	165604499	5800	-0.47948	1.61629e-07	2.42392e-06
25076	chr9	130334350	130338099	3750	0.903439	1.6207e-07	2.42922e-06
18967	chr6	169826500	169828849	2350	0.955712	1.63425e-07	2.44822e-06
36438	chr15	58796400	58799949	3550	0.802982	1.64011e-07	2.45568e-06
14206	chr5	37369900	37372779	2880	-0.523598	1.6427e-07	2.45823e-06
21275	chr7	151327750	151331099	3350	-0.624976	1.64983e-07	2.46758e-06
39970	chr17	4044550	4048529	3980	-0.556595	1.65414e-07	2.47269e-06
38150	chr16	11833850	11838229	4380	-0.492253	1.65508e-07	2.47278e-06
33303	chr13	26997330	27001279	3950	0.969874	1.65986e-07	2.47859e-06
34602	chr14	45429700	45433449	3750	-0.496556	1.66797e-07	2.48937e-06
41802	chr17	73028030	73033779	5750	-0.478542	1.67244e-07	2.4947e-06
2931	chr1	149831280	149835399	4120	-0.708662	1.67511e-07	2.49734e-06
18944	chr6	168851600	168855049	3450	0.836667	1.67676e-07	2.49847e-06
42123	chr17	79036600	79039499	2900	0.75103	1.67968e-07	2.50061e-06
6376	chr2	71839550	71846799	7250	0.469752	1.67999e-07	2.50061e-06
22793	chr8	102216000	102219849	3850	-0.559861	1.68259e-07	2.50315e-06
38757	chr16	49808950	49813249	4300	0.748388	1.68679e-07	2.50806e-06
14374	chr5	56467400	56471429	4030	-0.501348	1.68809e-07	2.50865e-06
13988	chr5	14141850	14148099	6250	-0.515568	1.70374e-07	2.53056e-06
16908	chr6	26595350	26598629	3280	-0.512035	1.70542e-07	2.5317e-06
27842	chr10	115932550	115935479	2930	-0.536324	1.72018e-07	2.55225e-06
24780	chr9	116917730	116921629	3900	0.665013	1.72737e-07	2.56156e-06
26197	chr10	30137480	30139579	2100	0.903214	1.72967e-07	2.56361e-06
325	chr1	8934750	8940649	5900	-0.463992	1.75277e-07	2.59646e-06
41699	chr17	66905730	66908599	2870	0.887813	1.77745e-07	2.63162e-06
34076	chr13	102964530	102966599	2070	1.03756	1.80658e-07	2.67334e-06
27558	chr10	102287880	102290999	3120	-0.48578	1.81658e-07	2.68671e-06
47766	chr22	30817950	30823279	5330	-0.46207	1.82996e-07	2.70507e-06
29749	chr11	69043450	69046999	3550	0.723249	1.84511e-07	2.72601e-06
3090	chr1	154529450	154532999	3550	-0.490614	1.84737e-07	2.72745e-06
23755	chr9	33288200	33291899	3700	-0.505346	1.84804e-07	2.72745e-06
14559	chr5	70881130	70884929	3800	-0.510067	1.86309e-07	2.74821e-06
33929	chr13	77564680	77567849	3170	-0.540445	1.86607e-07	2.75114e-06
18684	chr6	158089350	158093829	4480	0.668056	1.86907e-07	2.75412e-06
38011	chr16	4662350	4668699	6350	-0.483335	1.87592e-07	2.76275e-06
2109	chr1	68758100	68760999	2900	0.719368	1.877e-07	2.76288e-06
1440	chr1	41055000	41057049	2050	1.14642	1.87934e-07	2.76487e-06
31720	chr12	50295400	50299249	3850	0.941541	1.88056e-07	2.7652e-06
44681	chr19	44098380	44102479	4100	-0.400375	1.88699e-07	2.77319e-06
24921	chr9	125136300	125138849	2550	0.834001	1.88969e-07	2.7757e-06
23754	chr9	33262500	33266399	3900	-0.499477	1.89091e-07	2.77602e-06
12650	chr4	74122950	74126249	3300	-0.541868	1.90087e-07	2.78918e-06
12172	chr4	8507150	8509949	2800	0.776101	1.90634e-07	2.79574e-06
17044	chr6	31366950	31372529	5580	-0.558364	1.91454e-07	2.80628e-06
35152	chr14	75371850	75376299	4450	0.656086	1.92902e-07	2.82489e-06
35504	chr14	95402050	95404849	2800	0.886004	1.92926e-07	2.82489e-06
12264	chr4	17810930	17813299	2370	-0.551847	1.95559e-07	2.86194e-06
25206	chr9	132226700	132229399	2700	0.924872	1.9611e-07	2.8685e-06
7205	chr2	121668400	121679699	11300	0.591138	1.96565e-07	2.87364e-06
24857	chr9	124130000	124134179	4180	-0.460269	1.97422e-07	2.88466e-06
5764	chr2	42235630	42237749	2120	0.834738	1.97528e-07	2.8847e-06
16976	chr6	29719000	29721629	2630	-0.583192	1.97887e-07	2.88843e-06
45391	chr20	3656750	3664129	7380	0.68164	1.98196e-07	2.89142e-06
27134	chr10	81156200	81174149	17950	0.417028	1.98933e-07	2.90066e-06
4212	chr1	214169530	214171899	2370	0.699873	1.99499e-07	2.90739e-06
40104	chr17	7744050	7749829	5780	-0.548858	2.0016e-07	2.91549e-06
14947	chr5	115731080	115733229	2150	0.773196	2.00976e-07	2.92465e-06
31746	chr12	50793580	50796249	2670	-0.561531	2.00998e-07	2.92465e-06
33291	chr13	25495580	25499129	3550	-0.680295	2.01107e-07	2.92471e-06
40186	chr17	10014600	10025079	10480	0.570744	2.01943e-07	2.93254e-06
23785	chr9	34177350	34181379	4030	-0.581232	2.01968e-07	2.93254e-06
6780	chr2	99951500	99955349	3850	-0.560115	2.02034e-07	2.93254e-06
38285	chr16	17405830	17409099	3270	0.92378	2.02067e-07	2.93254e-06
42537	chr18	13608730	13617249	8520	-0.59972	2.02535e-07	2.93781e-06
224	chr1	6547850	6554029	6180	0.522464	2.02658e-07	2.93806e-06
41479	chr17	58675900	58679449	3550	-0.477031	2.04394e-07	2.96169e-06
17088	chr6	32142380	32147679	5300	-0.51983	2.05102e-07	2.9704e-06
31422	chr12	27174450	27176799	2350	-0.534303	2.05432e-07	2.97364e-06
46150	chr20	44046650	44051129	4480	-0.585449	2.06547e-07	2.98823e-06
24964	chr9	127561350	127564579	3230	0.626834	2.0741e-07	2.99916e-06
6973	chr2	109334200	109337679	3480	-0.575239	2.07675e-07	3.00144e-06
11257	chr3	158286880	158291649	4770	-0.518591	2.07911e-07	3.00329e-06
41261	chr17	48449180	48451479	2300	-0.576087	2.08421e-07	3.00909e-06
7862	chr2	183987500	183990399	2900	-0.490061	2.08801e-07	3.01302e-06
7093	chr2	113382530	113386649	4120	0.719934	2.09661e-07	3.02386e-06
40174	chr17	9923700	9927449	3750	0.722503	2.10006e-07	3.02728e-06
36620	chr15	65346300	65351499	5200	0.648576	2.1031e-07	3.0279e-06
13081	chr4	120219450	120223299	3850	-0.585712	2.10369e-07	3.0279e-06
28135	chr10	129844150	129848149	4000	0.534969	2.10375e-07	3.0279e-06
3674	chr1	184119150	184123449	4300	0.652656	2.11427e-07	3.04147e-06
40566	chr17	26925330	26927649	2320	-0.593879	2.1323e-07	3.06583e-06
37126	chr15	78590650	78593429	2780	-0.545102	2.13351e-07	3.06599e-06
27628	chr10	104419730	104422549	2820	0.717558	2.14104e-07	3.07523e-06
44453	chr19	36522380	36524979	2600	0.789891	2.14448e-07	3.07759e-06
22486	chr8	74789630	74792579	2950	-0.516648	2.14489e-07	3.07759e-06
18965	chr6	169651130	169653699	2570	0.964421	2.14729e-07	3.07944e-06
6179	chr2	62683350	62687349	4000	0.758683	2.14863e-07	3.07977e-06
23179	chr8	134158450	134160499	2050	0.897208	2.15074e-07	3.08122e-06
15358	chr5	140704780	140707099	2320	-0.615516	2.15407e-07	3.0844e-06
105	chr1	2220430	2226929	6500	0.654976	2.15741e-07	3.08759e-06
41152	chr17	45568500	45571479	2980	-0.490615	2.18912e-07	3.13138e-06
28199	chr10	134259300	134262729	3430	0.817026	2.20126e-07	3.14712e-06
30723	chr11	126250200	126257979	7780	0.622283	2.20781e-07	3.1542e-06
23317	chr8	142082450	142085699	3250	0.759439	2.20848e-07	3.1542e-06
5818	chr2	43378750	43381899	3150	0.650794	2.20961e-07	3.15421e-06
34408	chr14	23768400	23773099	4700	-0.548142	2.22832e-07	3.17929e-06
1622	chr1	46150750	46155099	4350	-0.560346	2.23022e-07	3.18037e-06
4666	chr1	234733350	234737679	4330	-0.724282	2.23569e-07	3.18654e-06
5857	chr2	44587530	44590479	2950	-0.418453	2.24494e-07	3.19809e-06
20671	chr7	106807650	106811549	3900	-0.718482	2.25758e-07	3.21446e-06
30276	chr11	108367100	108370599	3500	-0.555925	2.27337e-07	3.23528e-06
43961	chr19	13857150	13860549	3400	-0.629415	2.29922e-07	3.27041e-06
47000	chr21	43638580	43643599	5020	-0.793596	2.30264e-07	3.27359e-06
28687	chr11	12306450	12311149	4700	0.836161	2.31137e-07	3.28434e-06
45934	chr20	34328600	34332929	4330	-0.513694	2.3146e-07	3.28725e-06
16999	chr6	30582200	30587929	5730	-0.705371	2.32583e-07	3.30152e-06
41379	chr17	55623330	55625549	2220	0.875596	2.33423e-07	3.31175e-06
25198	chr9	132161000	132172599	11600	0.564941	2.34141e-07	3.31947e-06
27784	chr10	112618180	112621799	3620	0.722003	2.34205e-07	3.31947e-06
7887	chr2	190647730	190650499	2770	-0.571639	2.35954e-07	3.34256e-06
42439	chr18	10031500	10033849	2350	0.838355	2.36345e-07	3.34445e-06
30970	chr12	2459650	2464599	4950	0.608737	2.36429e-07	3.34445e-06
34520	chr14	32956550	32958729	2180	0.862388	2.36447e-07	3.34445e-06
34418	chr14	23937230	23940199	2970	-0.615421	2.38832e-07	3.37648e-06
33674	chr13	45562480	45564949	2470	-0.589606	2.39487e-07	3.38401e-06
27597	chr10	103910550	103913529	2980	-0.60244	2.41152e-07	3.40582e-06
25796	chr10	6424530	6426679	2150	1.06835	2.44133e-07	3.44617e-06
17898	chr6	97343980	97347049	3070	-0.572039	2.4465e-07	3.45172e-06
6546	chr2	86331930	86334749	2820	-0.631368	2.45082e-07	3.45606e-06
12683	chr4	77068080	77070799	2720	-0.570165	2.45381e-07	3.45853e-06
37049	chr15	76023000	76026599	3600	0.732226	2.4601e-07	3.46564e-06
6882	chr2	102651900	102654799	2900	0.929463	2.47142e-07	3.47983e-06
20055	chr7	66204130	66207479	3350	-0.572382	2.47481e-07	3.48285e-06
5855	chr2	44393830	44397829	4000	-0.623854	2.47646e-07	3.48341e-06
30327	chr11	111956200	111958899	2700	-0.515831	2.48608e-07	3.49518e-06
20107	chr7	72297500	72302949	5450	-0.633396	2.49549e-07	3.50664e-06
4092	chr1	208219550	208223179	3630	0.866648	2.50789e-07	3.52229e-06
16954	chr6	28350000	28352549	2550	-0.674074	2.5102e-07	3.52376e-06
29334	chr11	60917400	60920929	3530	0.826832	2.51581e-07	3.52986e-06
9436	chr3	37962780	37968129	5350	0.62421	2.54791e-07	3.5731e-06
9409	chr3	37629150	37636599	7450	0.576668	2.56275e-07	3.59073e-06
24371	chr9	96791680	96794549	2870	-0.605658	2.56306e-07	3.59073e-06
36475	chr15	60769950	60772279	2330	-0.587956	2.57642e-07	3.60741e-06
697	chr1	19227580	19230449	2870	-0.532511	2.57755e-07	3.60741e-06
32529	chr12	109172600	109175649	3050	0.755381	2.60319e-07	3.64146e-06
10293	chr3	73596400	73598449	2050	0.828436	2.60727e-07	3.64381e-06
28346	chr11	1959100	1961379	2280	0.771423	2.60748e-07	3.64381e-06
40304	chr17	16927130	16931799	4670	0.557594	2.61536e-07	3.65298e-06
13203	chr4	140373600	140376599	3000	-0.552802	2.62194e-07	3.66034e-06
2447	chr1	104067600	104069849	2250	-0.554756	2.63059e-07	3.66984e-06
[truncated: 9,360 more rows]
