# Supplementary material for: H3K27ac acetylome signatures reveal the epigenomic reorganization in remodeled non-failing human hearts
Source: Clin Epigenetics. 2020 Jul 14;12:106. doi: 10.1186/s13148-020-00895-5 (PMC7362435; doi:10.1186/s13148-020-00895-5)
Supplement: Supplementary file 9 — Additional file 9. Supplementary Table 3. a Genes in the vicinity of hyperacetylated regions using a ± 5 kb window. b Genes in the vicinity of hypoacetylated regions using a ± 5 kb window. [file 13148_2020_895_MOESM9_ESM.xlsx]

## Sheet: Supplementary Table 3A
Supplementary Table 3A: Genes in the vicinity of hyperacetylated regions using +/-5kb window from transcription start site
Region ID*	Chromosome	Region Start†	Region End†	Gene			*: Regions were sorted by non-adjusted p-value from largest to smallest;
26877	chr10	73495080	73499179	C10orf105			†: Genomic coordinates were indicated using human genome assembly GRCh37/hg19.
3453	chr1	171620230	171622629	MYOC
3034	chr1	153525000	153527849	S100A3
5864	chr2	45483380	45487579	LINC01121
15089	chr5	132105280	132114679	SEPT8
15089	chr5	132105280	132114679	SEPT8
15089	chr5	132105280	132114679	SEPT8
15089	chr5	132105280	132114679	SEPT8
15089	chr5	132105280	132114679	SEPT8
15089	chr5	132105280	132114679	SEPT8
14745	chr5	83677200	83681149	EDIL3
14745	chr5	83677200	83681149	EDIL3
42860	chr18	43196680	43201199	SLC14A2
39255	chr16	73126150	73131349	HCCAT5
35576	chr14	100568150	100576699	MIR151B
35576	chr14	100568150	100576699	MIR342
21960	chr8	27559200	27561579	MIR3622B
21960	chr8	27559200	27561579	MIR3622A
40256	chr17	15370600	15374299	CDRT4
25190	chr9	132042300	132046549	LOC101929331
20876	chr7	130019000	130021649	CPA1
30631	chr11	123063750	123067799	CLMP
14636	chr5	76114200	76117029	F2RL1
15950	chr5	169779800	169783199	KCNIP1
47807	chr22	32020330	32023549	PISD
47807	chr22	32020330	32023549	MIR7109
7272	chr2	128436380	128440449	LIMS2
9059	chr3	13585880	13592849	FBLN2
9059	chr3	13585880	13592849	FBLN2
33557	chr13	41050830	41059349	LINC00598
33557	chr13	41050830	41059349	LINC00598
33557	chr13	41050830	41059349	LINC00598
9060	chr3	13592980	13596699	FBLN2
9060	chr3	13592980	13596699	FBLN2
1648	chr1	47071900	47074599	MKNK1
1648	chr1	47071900	47074599	MKNK1
1648	chr1	47071900	47074599	MKNK1
1648	chr1	47071900	47074599	MKNK1
1648	chr1	47071900	47074599	MKNK1
3414	chr1	168695330	168699049	DPT
47806	chr22	32010430	32014929	MIR7109
225	chr1	6554080	6563879	PLEKHG5
225	chr1	6554080	6563879	PLEKHG5
46026	chr20	36886730	36889949	KIAA1755
46026	chr20	36886730	36889949	LOC149684
41292	chr17	48911230	48914979	WFIKKN2
12758	chr4	83674250	83676879	MIR575
42	chr1	1292050	1297979	MXRA8
42	chr1	1292050	1297979	MXRA8
42	chr1	1292050	1297979	MXRA8
42	chr1	1292050	1297979	MXRA8
42	chr1	1292050	1297979	MXRA8
29427	chr11	62454600	62459579	LRRN4CL
20289	chr7	76755350	76757399	CCDC146
4029	chr1	205909280	205911979	SLC26A9
4029	chr1	205909280	205911979	SLC26A9
25127	chr9	131003800	131009099	MIR199B
25127	chr9	131003800	131009099	MIR3154
48370	chr22	45605600	45610649	KIAA0930
28570	chr11	9775850	9778449	LOC440028
28570	chr11	9775850	9778449	SBF2-AS1
24315	chr9	95376150	95381629	LOC100128361
3996	chr1	205412350	205415949	MIR135B
36778	chr15	69098250	69102279	ANP32A-IT1
2477	chr1	109795450	109799299	CELSR2
41508	chr17	60703630	60709979	MRC2
18699	chr6	158434850	158444479	SYNJ2
19870	chr7	47659350	47663049	LINC01447
2502	chr1	110165680	110168099	AMPD2
2502	chr1	110165680	110168099	AMPD2
2502	chr1	110165680	110168099	AMPD2
2502	chr1	110165680	110168099	AMPD2
2502	chr1	110165680	110168099	AMPD2
2502	chr1	110165680	110168099	AMPD2
40454	chr17	19313580	19316199	RNF112
9441	chr3	38007550	38012079	MIR26A1
36767	chr15	68923500	68928699	CORO2B
18881	chr6	166873300	166877399	RPS6KA2-IT1
13035	chr4	114899400	114902079	ARSJ
40804	chr17	37299100	37306899	PLXDC1
28668	chr11	12157650	12161699	MICAL2
28668	chr11	12157650	12161699	MICAL2
2634	chr1	114524700	114528849	OLFML3
2634	chr1	114524700	114528849	OLFML3
2634	chr1	114524700	114528849	OLFML3
36972	chr15	74459800	74470149	ISLR
36972	chr15	74459800	74470149	ISLR
30458	chr11	117067780	117078599	LOC100652768
30458	chr11	117067780	117078599	TAGLN
30458	chr11	117067780	117078599	TAGLN
43399	chr19	1359480	1362899	MUM1
9566	chr3	42912000	42914999	CYP8B1
32808	chr12	120030930	120034279	TMEM233
11981	chr4	2245000	2248679	POLN
11981	chr4	2245000	2248679	HAUS3
11981	chr4	2245000	2248679	HAUS3
21955	chr8	27466930	27470129	CLU
21955	chr8	27466930	27470129	CLU
21955	chr8	27466930	27470129	CLU
21955	chr8	27466930	27470129	MIR6843
9478	chr3	39181830	39186429	MIR6822
35532	chr14	96503800	96507499	C14orf132
35532	chr14	96503800	96507499	C14orf132
35532	chr14	96503800	96507499	C14orf132
35532	chr14	96503800	96507499	C14orf132
38639	chr16	31074900	31077829	ZNF668
38639	chr16	31074900	31077829	ZNF668
31880	chr12	54777530	54780449	ZNF385A
31880	chr12	54777530	54780449	ZNF385A
31880	chr12	54777530	54780449	ZNF385A
31880	chr12	54777530	54780449	ZNF385A
35400	chr14	91719230	91722579	GPR68
16228	chr5	178011500	178013849	COL23A1
41836	chr17	73493780	73498949	MIR6785
5679	chr2	38264280	38266529	RMDN2-AS1
19790	chr7	44794130	44798029	ZMIZ2
37069	chr15	77286400	77290079	PSTPIP1
6533	chr2	86037850	86039899	LOC284950
31632	chr12	48165630	48172929	SLC48A1
40284	chr17	16322250	16324299	TRPV2
29786	chr11	69916050	69920779	ANO1-AS2
44538	chr19	39366130	39370329	RINL
44538	chr19	39366130	39370329	RINL
652	chr1	17090150	17093979	MST1L
48257	chr22	43004800	43007449	POLDIP3
48257	chr22	43004800	43007449	POLDIP3
48257	chr22	43004800	43007449	POLDIP3
48257	chr22	43004800	43007449	POLDIP3
3190	chr1	156673800	156679129	CRABP2
3190	chr1	156673800	156679129	CRABP2
37870	chr16	2208050	2212749	TRAF7
35200	chr14	76071550	76073599	MIR7641-2
35200	chr14	76071550	76073599	FLVCR2
19745	chr7	44139400	44149099	AEBP1
45166	chr19	55793830	55797849	HSPBP1
45166	chr19	55793830	55797849	HSPBP1
45166	chr19	55793830	55797849	HSPBP1
45166	chr19	55793830	55797849	BRSK1
15059	chr5	131554180	131556899	MIR6830
48389	chr22	45898750	45902249	FBLN1
48389	chr22	45898750	45902249	FBLN1
48389	chr22	45898750	45902249	FBLN1
48389	chr22	45898750	45902249	FBLN1
30427	chr11	115629350	115632279	LINC00900
19176	chr7	2545400	2552799	LFNG
24872	chr9	124326330	124332279	DAB2IP
39103	chr16	67976780	67979799	LCAT
29641	chr11	66737700	66739749	C11orf86
2830	chr1	145074650	145076729	PDE4DIP
46073	chr20	39992600	39995429	EMILIN3
4399	chr1	226127330	226130829	LEFTY2
4399	chr1	226127330	226130829	LEFTY2
31659	chr12	49159330	49163099	MIR4701
48245	chr22	42760130	42765229	LINC01315
48245	chr22	42760130	42765229	LINC01315
48245	chr22	42760130	42765229	LINC01315
26816	chr10	72236950	72244299	PALD1
26544	chr10	49811050	49813899	ARHGAP22
26544	chr10	49811050	49813899	ARHGAP22
35231	chr14	77245530	77251699	LOC100506603
35231	chr14	77245530	77251699	LOC100506603
47516	chr22	24575000	24579649	SUSD2
651	chr1	17085480	17088979	MST1L
19625	chr7	35288000	35290479	TBX20
19625	chr7	35288000	35290479	TBX20
11565	chr3	184431750	184436329	MAGEF1
8178	chr2	217496630	217503799	IGFBP2
31165	chr12	7060650	7064329	PTPN6
31165	chr12	7060650	7064329	PTPN6
7113	chr2	114354200	114358879	DDX11L2
7113	chr2	114354200	114358879	DDX11L2
45722	chr20	23620900	23624249	CST3
45722	chr20	23620900	23624249	CST3
46408	chr20	51588680	51591199	TSHZ2
29225	chr11	47606930	47609979	FAM180B
38780	chr16	50298850	50301979	ADCY7
29017	chr11	35545200	35548429	PAMR1
29017	chr11	35545200	35548429	PAMR1
29017	chr11	35545200	35548429	PAMR1
6809	chr2	100719530	100723079	AFF3
4578	chr1	230992300	230995299	C1orf198
15276	chr5	138718480	138721979	SLC23A1
15276	chr5	138718480	138721979	SLC23A1
35427	chr14	92975600	92982599	RIN3
1751	chr1	53610750	53613279	SLC1A7
1751	chr1	53610750	53613279	SLC1A7
1751	chr1	53610750	53613279	SLC1A7
1751	chr1	53610750	53613279	SLC1A7
1751	chr1	53610750	53613279	SLC1A7
3986	chr1	205217150	205219749	TMCC2
3902	chr1	203317830	203321749	FMOD
3902	chr1	203317830	203321749	FMOD
25380	chr9	136390980	136395429	TMEM8C
25380	chr9	136390980	136395429	ADAMTSL2
20156	chr7	73440600	73446299	ELN
20156	chr7	73440600	73446299	ELN
20156	chr7	73440600	73446299	ELN
20156	chr7	73440600	73446299	ELN
20156	chr7	73440600	73446299	ELN
20156	chr7	73440600	73446299	ELN
20156	chr7	73440600	73446299	ELN
20156	chr7	73440600	73446299	ELN
20156	chr7	73440600	73446299	ELN
20156	chr7	73440600	73446299	ELN
20156	chr7	73440600	73446299	ELN
20156	chr7	73440600	73446299	ELN
20156	chr7	73440600	73446299	ELN
35159	chr14	75417230	75419829	PGF
35159	chr14	75417230	75419829	PGF
35159	chr14	75417230	75419829	PGF
25076	chr9	130334350	130338099	FAM129B
24780	chr9	116917730	116921629	COL27A1
31720	chr12	50295400	50299249	FAIM2
24921	chr9	125136300	125138849	PTGS1
24921	chr9	125136300	125138849	PTGS1
24921	chr9	125136300	125138849	PTGS1
24921	chr9	125136300	125138849	PTGS1
24921	chr9	125136300	125138849	PTGS1
24921	chr9	125136300	125138849	PTGS1
24921	chr9	125136300	125138849	PTGS1
45391	chr20	3656750	3664129	ADAM33
45391	chr20	3656750	3664129	ADAM33
45391	chr20	3656750	3664129	ADAM33
224	chr1	6547850	6554029	PLEKHG5
224	chr1	6547850	6554029	PLEKHG5
224	chr1	6547850	6554029	PLEKHG5
224	chr1	6547850	6554029	PLEKHG5
24964	chr9	127561350	127564579	OLFML2A
40174	chr17	9923700	9927449	GAS7
28135	chr10	129844150	129848149	PTPRE
44453	chr19	36522380	36524979	CLIP3
44453	chr19	36522380	36524979	CLIP3
18965	chr6	169651130	169653699	THBS2
28199	chr10	134259300	134262729	C10orf91
28687	chr11	12306450	12311149	MICALCL
42155	chr17	79531650	79536799	NPLOC4
46991	chr21	43376130	43379729	C2CD2
3401	chr1	168212650	168214699	ANKRD36BP1
18045	chr6	111884900	111891029	TRAF3IP2
213	chr1	6319700	6325729	GPR153
27211	chr10	88407380	88412329	OPN4
27211	chr10	88407380	88412329	OPN4
30122	chr11	86509950	86513149	PRSS23
30122	chr11	86509950	86513149	PRSS23
30122	chr11	86509950	86513149	PRSS23
30122	chr11	86509950	86513149	PRSS23
30122	chr11	86509950	86513149	PRSS23
30122	chr11	86509950	86513149	PRSS23
20118	chr7	72570250	72572429	GTF2IP4
20118	chr7	72570250	72572429	GTF2IP1
48462	chr22	47168400	47174529	TBC1D22A
3640	chr1	183269680	183277829	NMNAT2
6512	chr2	85804200	85808199	VAMP8
12380	chr4	38113530	38117879	TBC1D1
12380	chr4	38113530	38117879	TBC1D1
8937	chr3	11034050	11037149	SLC6A1
109	chr1	2283800	2285979	LOC100129534
43836	chr19	10927030	10930579	MIR199A1
30012	chr11	76776330	76786729	CAPN5
40990	chr17	41735400	41741049	MEOX1
40990	chr17	41735400	41741049	MEOX1
40990	chr17	41735400	41741049	MEOX1
22265	chr8	49462630	49464729	LOC101929268
40539	chr17	25798950	25803479	KSR1
36124	chr15	40727750	40729979	BAHD1
36124	chr15	40727750	40729979	BAHD1
36124	chr15	40727750	40729979	BAHD1
35291	chr14	81889180	81891229	STON2
35291	chr14	81889180	81891229	STON2
23968	chr9	66454750	66459229	LINC01410
30725	chr11	126270380	126276849	ST3GAL4
30725	chr11	126270380	126276849	ST3GAL4
28320	chr11	1501300	1510179	MOB2
28320	chr11	1501300	1510179	MOB2
19749	chr7	44179800	44182749	MYL7
219	chr1	6415550	6421599	ACOT7
219	chr1	6415550	6421599	ACOT7
8284	chr2	219695700	219698149	PRKAG3
45573	chr20	17536800	17540449	BFSP1
45573	chr20	17536800	17540449	BFSP1
45573	chr20	17536800	17540449	BFSP1
25515	chr9	139292930	139295999	SNAPC4
5102	chr2	10217600	10221999	CYS1
8262	chr2	219122580	219130449	GPBAR1
8262	chr2	219122580	219130449	GPBAR1
8262	chr2	219122580	219130449	GPBAR1
47569	chr22	25420680	25425499	KIAA1671
26049	chr10	21788150	21790649	CASC10
26049	chr10	21788150	21790649	MIR1915
28282	chr11	705630	708479	EPS8L2
2633	chr1	114520830	114524179	OLFML3
2633	chr1	114520830	114524179	OLFML3
2633	chr1	114520830	114524179	OLFML3
44830	chr19	46997800	46999879	PNMAL2
15533	chr5	146831100	146835479	DPYSL3
21804	chr8	22434850	22440229	PDLIM2
21804	chr8	22434850	22440229	PDLIM2
21804	chr8	22434850	22440229	PDLIM2
24313	chr9	95359700	95365449	CENPP
4084	chr1	208077650	208085749	CD34
4084	chr1	208077650	208085749	CD34
23658	chr9	14909200	14911499	FREM1
23863	chr9	36135150	36138599	GLIPR2
23863	chr9	36135150	36138599	GLIPR2
23863	chr9	36135150	36138599	GLIPR2
23863	chr9	36135150	36138599	GLIPR2
23863	chr9	36135150	36138599	GLIPR2
23863	chr9	36135150	36138599	GLIPR2
23863	chr9	36135150	36138599	GLIPR2
23863	chr9	36135150	36138599	GLIPR2
23863	chr9	36135150	36138599	GLIPR2
23863	chr9	36135150	36138599	GLIPR2
23863	chr9	36135150	36138599	GLIPR2
44148	chr19	17828950	17832849	MAP1S
44148	chr19	17828950	17832849	MAP1S
42195	chr17	80173400	80176299	CCDC57
41713	chr17	70025730	70027899	LOC102723505
41713	chr17	70025730	70027899	LINC01152
41713	chr17	70025730	70027899	LINC01152
4697	chr1	235089550	235108029	LOC101927851
39897	chr17	2133780	2139249	SMG6
39897	chr17	2133780	2139249	LOC101927839
46313	chr20	48655530	48657879	TRERNA1
39563	chr16	86600200	86608299	FOXC2-AS1
39563	chr16	86600200	86608299	FOXC2
11949	chr4	1198580	1206049	SPON2
11949	chr4	1198580	1206049	LOC100130872
11949	chr4	1198580	1206049	CTBP1-AS
22072	chr8	37378080	37383279	LINC01605
44264	chr19	20846980	20849379	ZNF626
44264	chr19	20846980	20849379	ZNF626
31957	chr12	57538800	57548129	LRP1-AS
31957	chr12	57538800	57548129	LRP1-AS
45294	chr20	281130	283699	ZCCHC3
36730	chr15	68496950	68499179	CALML4
36730	chr15	68496950	68499179	CALML4
36730	chr15	68496950	68499179	CALML4
36730	chr15	68496950	68499179	CALML4
36730	chr15	68496950	68499179	CALML4
35903	chr15	26093250	26096599	MIR4715
26850	chr10	72967680	72984649	UNC5B
26850	chr10	72967680	72984649	UNC5B
26850	chr10	72967680	72984649	UNC5B-AS1
40148	chr17	8646880	8650829	CCDC42
40148	chr17	8646880	8650829	CCDC42
37474	chr15	91449450	91451829	MAN2A2
46825	chr21	35882300	35884679	KCNE1
46825	chr21	35882300	35884679	KCNE1
46825	chr21	35882300	35884679	KCNE1
46825	chr21	35882300	35884679	KCNE1
38933	chr16	57518400	57521849	DOK4
19260	chr7	5630050	5637199	FSCN1
40512	chr17	21307380	21310379	KCNJ18
41257	chr17	48346080	48351329	TMEM92
41257	chr17	48346080	48351329	TMEM92
134	chr1	3039400	3047749	MIR4251
23309	chr8	142014450	142016729	PTK2
23309	chr8	142014450	142016729	PTK2
23309	chr8	142014450	142016729	PTK2
25566	chr9	139888980	139892029	C9orf142
25566	chr9	139888980	139892029	CLIC3
16651	chr6	13480750	13484799	GFOD1
31120	chr12	6484700	6486729	SCNN1A
31120	chr12	6484700	6486729	SCNN1A
31120	chr12	6484700	6486729	SCNN1A
31120	chr12	6484700	6486729	LTBR
29767	chr11	69297900	69308149	LINC01488
29767	chr11	69297900	69308149	LINC01488
29767	chr11	69297900	69308149	LINC01488
29767	chr11	69297900	69308149	LINC01488
35520	chr14	95874280	95879599	LINC00341
4394	chr1	226012230	226016899	EPHX1
29929	chr11	74860700	74864649	SLCO2B1
29929	chr11	74860700	74864649	SLCO2B1
3033	chr1	153516200	153524899	S100A4
3033	chr1	153516200	153524899	S100A4
3033	chr1	153516200	153524899	LOC101928034
3033	chr1	153516200	153524899	S100A3
34883	chr14	65168930	65178099	PLEKHG3
46628	chr20	62708780	62712829	RGS19
46628	chr20	62708780	62712829	RGS19
46628	chr20	62708780	62712829	MIR6813
46628	chr20	62708780	62712829	OPRL1
46628	chr20	62708780	62712829	OPRL1
46628	chr20	62708780	62712829	LKAAEAR1
37436	chr15	90748250	90750379	SEMA4B
29820	chr11	71722330	71726499	LOC100128494
42156	chr17	79543030	79545399	NPLOC4
38691	chr16	46655900	46659099	SHCBP1
29463	chr11	63653200	63657429	MARK2
10773	chr3	126700100	126706099	PLXNA1
8486	chr2	233922930	233929749	INPP5D
8486	chr2	233922930	233929749	INPP5D
553	chr1	15269150	15273629	KAZN
10480	chr3	112051050	112053299	CD200
10480	chr3	112051050	112053299	CD200
47197	chr21	47511030	47515399	COL6A2
47197	chr21	47511030	47515399	COL6A2
47197	chr21	47511030	47515399	COL6A2
29160	chr11	46292950	46302149	CREB3L1
18696	chr6	158419180	158421779	SYNJ2-IT1
3205	chr1	157961450	157965949	KIRREL
3205	chr1	157961450	157965949	KIRREL
41194	chr17	47325550	47328399	FLJ40194
20506	chr7	100069380	100078299	TSC22D4
20506	chr7	100069380	100078299	TSC22D4
20506	chr7	100069380	100078299	TSC22D4
20506	chr7	100069380	100078299	TSC22D4
22927	chr8	120427550	120430229	NOV
39752	chr17	27900	33049	DOC2B
29509	chr11	64320300	64324179	SLC22A11
29509	chr11	64320300	64324179	SLC22A11
3038	chr1	153587500	153590899	S100A16
3038	chr1	153587500	153590899	S100A14
26409	chr10	43867350	43870079	FXYD4
26409	chr10	43867350	43870079	FXYD4
34079	chr13	103051350	103055799	FGF14
4040	chr1	206642580	206645299	IKBKE
4040	chr1	206642580	206645299	IKBKE
4040	chr1	206642580	206645299	IKBKE
4040	chr1	206642580	206645299	MIR6769B
22087	chr8	37652930	37664499	ADGRA2
36665	chr15	66989650	67001349	SMAD6
36665	chr15	66989650	67001349	SMAD6
16446	chr6	5032630	5034879	LOC100129461
16446	chr6	5032630	5034879	LOC100129461
30567	chr11	120079550	120085649	OAF
11157	chr3	149195630	149199079	TM4SF4
29911	chr11	74177100	74179999	KCNE3
38217	chr16	14917500	14919799	ABCC6P2
41569	chr17	62402600	62411799	PECAM1
3960	chr1	204325900	204333899	PLEKHA6
15635	chr5	149531380	149545629	PDGFRB
7763	chr2	175497380	175500649	WIPF1
9893	chr3	52522280	52526449	STAB1
36977	chr15	74530930	74535729	CCDC33
41417	chr17	56411530	56416249	MIR4736
41417	chr17	56411530	56416249	BZRAP1-AS1
41417	chr17	56411530	56416249	BZRAP1-AS1
41417	chr17	56411530	56416249	BZRAP1-AS1
41417	chr17	56411530	56416249	BZRAP1-AS1
41417	chr17	56411530	56416249	BZRAP1-AS1
3794	chr1	201461730	201473899	CSRP1
28341	chr11	1888400	1905299	LSP1
28341	chr11	1888400	1905299	LSP1
28341	chr11	1888400	1905299	MIR7847
514	chr1	12569880	12574399	SNORA59B
514	chr1	12569880	12574399	SNORA59A
2327	chr1	94057350	94060279	LOC100129046
30767	chr11	128558630	128561699	FLI1
30767	chr11	128558630	128561699	FLI1
30767	chr11	128558630	128561699	FLI1
30767	chr11	128558630	128561699	FLI1
1179	chr1	32165200	32171679	COL16A1
18209	chr6	126134630	126136749	NCOA7-AS1
6445	chr2	74640780	74644049	C2orf81
32969	chr12	123751100	123756499	CDK2AP1
32969	chr12	123751100	123756499	CDK2AP1
32969	chr12	123751100	123756499	CDK2AP1
32969	chr12	123751100	123756499	CDK2AP1
32969	chr12	123751100	123756499	CDK2AP1
26435	chr10	44399280	44403099	LINC00841
16041	chr5	172066630	172077729	NEURL1B
16041	chr5	172066630	172077729	NEURL1B
16041	chr5	172066630	172077729	NEURL1B
48533	chr22	51115250	51118099	SHANK3
19706	chr7	41738100	41742129	INHBA
2853	chr1	145524050	145528699	ITGA10
2853	chr1	145524050	145528699	ITGA10
2853	chr1	145524050	145528699	ITGA10
16282	chr5	180071280	180074949	FLT4
16282	chr5	180071280	180074949	FLT4
46017	chr20	36778180	36800949	TGM2
46017	chr20	36778180	36800949	TGM2
43502	chr19	3027900	3030779	TLE2
43502	chr19	3027900	3030779	TLE2
43502	chr19	3027900	3030779	TLE2
16272	chr5	179333200	179336599	TBC1D9B
16272	chr5	179333200	179336599	TBC1D9B
46984	chr21	43097780	43100549	LINC00111
184	chr1	3687380	3693679	SMIM1
184	chr1	3687380	3693679	SMIM1
12004	chr4	2810350	2815599	SH3BP2
39586	chr16	87092630	87094879	LOC440390
38503	chr16	28436500	28438929	EIF3C
11551	chr3	184277950	184284579	EPHB3
43863	chr19	11370950	11380449	DOCK6
29297	chr11	58938350	58943779	DTX4
29297	chr11	58938350	58943779	DTX4
29500	chr11	64079750	64082799	TRMT112
29500	chr11	64079750	64082799	TRMT112
29500	chr11	64079750	64082799	TRMT112
29500	chr11	64079750	64082799	PRDX5
29500	chr11	64079750	64082799	PRDX5
29500	chr11	64079750	64082799	PRDX5
25191	chr9	132075750	132085879	C9orf106
41191	chr17	47286150	47289499	GNGT2
41191	chr17	47286150	47289499	GNGT2
41191	chr17	47286150	47289499	GNGT2
41191	chr17	47286150	47289499	GNGT2
41191	chr17	47286150	47289499	ABI3
41191	chr17	47286150	47289499	ABI3
11937	chr4	979430	982349	IDUA
11937	chr4	979430	982349	IDUA
8468	chr2	232793680	232797079	NPPC
24221	chr9	91360650	91365399	MIR4289
46160	chr20	44454580	44456879	TNNC2
31633	chr12	48191700	48225829	HDAC7
31633	chr12	48191700	48225829	HDAC7
31633	chr12	48191700	48225829	HDAC7
31835	chr12	53624000	53628829	RARG
31835	chr12	53624000	53628829	RARG
31835	chr12	53624000	53628829	RARG
45190	chr19	56158100	56161529	ZNF581
45190	chr19	56158100	56161529	CCDC106
21103	chr7	140305600	140308749	DENND2A
40359	chr17	17669380	17675099	RAI1-AS1
46468	chr20	56259300	56262479	PMEPA1
18697	chr6	158422000	158426179	SYNJ2-IT1
22941	chr8	121135100	121138049	COL14A1
29005	chr11	35159200	35164199	LOC100507144
29005	chr11	35159200	35164199	CD44
29005	chr11	35159200	35164199	CD44
29005	chr11	35159200	35164199	CD44
29005	chr11	35159200	35164199	CD44
29005	chr11	35159200	35164199	CD44
29005	chr11	35159200	35164199	CD44
29005	chr11	35159200	35164199	CD44
29005	chr11	35159200	35164199	CD44
44827	chr19	46973330	46976099	PNMAL1
44827	chr19	46973330	46976099	PNMAL1
32501	chr12	108731750	108734999	CMKLR1
32501	chr12	108731750	108734999	CMKLR1
32501	chr12	108731750	108734999	CMKLR1
43452	chr19	2230050	2232379	MIR1227
43452	chr19	2230050	2232379	MIR6789
1741	chr1	53526330	53529629	PODN
1741	chr1	53526330	53529629	PODN
1741	chr1	53526330	53529629	PODN
1741	chr1	53526330	53529629	PODN
20487	chr7	99764600	99767799	GAL3ST4
47718	chr22	29597050	29599979	EMID1
47718	chr22	29597050	29599979	EMID1
46990	chr21	43371850	43374499	C2CD2
40064	chr17	7163180	7167349	CLDN7
40064	chr17	7163180	7167349	CLDN7
40064	chr17	7163180	7167349	CLDN7
14941	chr5	115151400	115153599	CDO1
33763	chr13	50201100	50206049	ARL11
30815	chr11	130539550	130543749	C11orf44
47625	chr22	26980250	26984149	TPST2
6428	chr2	74210400	74216199	DGUOK-AS1
6428	chr2	74210400	74216199	DGUOK-AS1
6428	chr2	74210400	74216199	TET3
8760	chr2	241929600	241940099	SNED1
38941	chr16	57676180	57678349	ADGRG1
38941	chr16	57676180	57678349	ADGRG1
29562	chr11	65155950	65161779	FRMD8
29562	chr11	65155950	65161779	FRMD8
29562	chr11	65155950	65161779	FRMD8
3160	chr1	155943130	155955179	ARHGEF2
3160	chr1	155943130	155955179	ARHGEF2
3160	chr1	155943130	155955179	ARHGEF2
43124	chr18	56533600	56535829	ZNF532
9722	chr3	48518550	48520899	SHISA5
9722	chr3	48518550	48520899	SHISA5
38514	chr16	28703180	28706549	EIF3C
44833	chr19	47121550	47130499	PTGIR
24306	chr9	95244700	95248229	ASPN
24306	chr9	95244700	95248229	ASPN
35154	chr14	75382280	75386549	RPS6KL1
5758	chr2	42164150	42166749	LOC101929723
5758	chr2	42164150	42166749	LOC101929723
38585	chr16	30218700	30222299	LOC613038
38585	chr16	30218700	30222299	LOC388242
24578	chr9	108206550	108208899	FSD1L
24578	chr9	108206550	108208899	FSD1L
24578	chr9	108206550	108208899	FSD1L
24578	chr9	108206550	108208899	FSD1L
47583	chr22	25757600	25763779	LRP5L
46342	chr20	48936700	48939799	LINC01271
17399	chr6	41470950	41474429	LINC01276
769	chr1	20914550	20917349	CDA
12742	chr4	81103650	81106799	PRDM8
24960	chr9	127536050	127543699	OLFML2A
2232	chr1	87593850	87599499	LINC01140
2232	chr1	87593850	87599499	LINC01140
2232	chr1	87593850	87599499	LINC01140
2232	chr1	87593850	87599499	LINC01140
2232	chr1	87593850	87599499	LINC01140
12556	chr4	55095300	55101029	PDGFRA
30470	chr11	117697900	117701049	FXYD2
30470	chr11	117697900	117701049	FXYD2
14973	chr5	121647180	121649499	SNCAIP
14973	chr5	121647180	121649499	SNCAIP
14973	chr5	121647180	121649499	SNCAIP
14973	chr5	121647180	121649499	SNCAIP
14973	chr5	121647180	121649499	SNCAIP
14973	chr5	121647180	121649499	SNCAIP
19268	chr7	5716530	5721599	RNF216-IT1
25381	chr9	136398150	136406749	ADAMTSL2
45921	chr20	33758880	33762479	PROCR
41873	chr17	74140400	74143679	FOXJ1
3052	chr1	153742050	153749949	SLC27A3
41259	chr17	48366100	48369929	TMEM92-AS1
24178	chr9	86956550	86958999	SLC28A3
24178	chr9	86956550	86958999	SLC28A3
41143	chr17	45280500	45288979	MYL4
41143	chr17	45280500	45288979	MYL4
12050	chr4	5708530	5713499	EVC2
12050	chr4	5708530	5713499	EVC2
12050	chr4	5708530	5713499	EVC
12050	chr4	5708530	5713499	EVC
12050	chr4	5708530	5713499	EVC
15649	chr5	149874900	149907499	NDST1
41945	chr17	75398750	75402629	SEPT9
15804	chr5	157077930	157079979	SOX30
15804	chr5	157077930	157079979	SOX30
46029	chr20	36925850	36929549	BPI
40789	chr17	37067600	37070929	MIR6779
44434	chr19	36000080	36002229	DMKN
44434	chr19	36000080	36002229	DMKN
44434	chr19	36000080	36002229	DMKN
44434	chr19	36000080	36002229	DMKN
44434	chr19	36000080	36002229	DMKN
44434	chr19	36000080	36002229	DMKN
44434	chr19	36000080	36002229	DMKN
44434	chr19	36000080	36002229	DMKN
44434	chr19	36000080	36002229	DMKN
44434	chr19	36000080	36002229	DMKN
44434	chr19	36000080	36002229	DMKN
35160	chr14	75420230	75422949	PGF
35160	chr14	75420230	75422949	PGF
35160	chr14	75420230	75422949	PGF
12555	chr4	55091700	55094899	PDGFRA
14632	chr5	76009600	76013649	NCRUPAR
14632	chr5	76009600	76013649	F2R
22679	chr8	96230350	96234599	LINC01298
44995	chr19	50012550	50017599	FCGRT
44995	chr19	50012550	50017599	FCGRT
31154	chr12	6948200	6951449	GNB3
31154	chr12	6948200	6951449	GNB3
46413	chr20	52195500	52199229	ZNF217
33974	chr13	96294980	96297329	DZIP1
33974	chr13	96294980	96297329	DZIP1
25280	chr9	133971380	133975799	AIF1L
25280	chr9	133971380	133975799	AIF1L
25280	chr9	133971380	133975799	AIF1L
25280	chr9	133971380	133975799	AIF1L
28051	chr10	125649250	125652829	CPXM2
14301	chr5	52776930	52779729	FST
14301	chr5	52776930	52779729	FST
10199	chr3	69433680	69436099	FRMD4B
5198	chr2	16079080	16082399	MYCNOS
5198	chr2	16079080	16082399	MYCNOS
5198	chr2	16079080	16082399	MYCN
5198	chr2	16079080	16082399	MYCN
5198	chr2	16079080	16082399	MYCN
5198	chr2	16079080	16082399	MYCN
20404	chr7	95025050	95027249	PON3
29787	chr11	69922200	69926579	ANO1-AS2
29787	chr11	69922200	69926579	ANO1
40791	chr17	37080850	37082929	LINC00672
5141	chr2	11530730	11536749	LINC00570
28908	chr11	27236350	27238899	BBOX1-AS1
28908	chr11	27236350	27238899	BBOX1-AS1
28908	chr11	27236350	27238899	BBOX1-AS1
17019	chr6	30848280	30855179	DDR1
17019	chr6	30848280	30855179	DDR1
17019	chr6	30848280	30855179	DDR1
17019	chr6	30848280	30855179	DDR1
17019	chr6	30848280	30855179	DDR1
17019	chr6	30848280	30855179	DDR1
17019	chr6	30848280	30855179	DDR1
17019	chr6	30848280	30855179	DDR1
17019	chr6	30848280	30855179	DDR1
24517	chr9	101704200	101707779	COL15A1
14592	chr5	71851480	71854199	LOC102503427
9650	chr3	46503030	46507749	LTF
9650	chr3	46503030	46507749	LTF
6943	chr2	106754050	106756599	UXS1
45432	chr20	4792680	4796449	RASSF2
26473	chr10	45405900	45410499	TMEM72
15418	chr5	141692380	141697749	SPRY4-IT1
37419	chr15	90542230	90550779	ZNF710
37419	chr15	90542230	90550779	MIR3174
47676	chr22	28190180	28202029	MN1
32958	chr12	123467980	123470999	ARL6IP4
32958	chr12	123467980	123470999	ARL6IP4
32958	chr12	123467980	123470999	ARL6IP4
32958	chr12	123467980	123470999	ARL6IP4
32958	chr12	123467980	123470999	ARL6IP4
32958	chr12	123467980	123470999	ARL6IP4
32958	chr12	123467980	123470999	ARL6IP4
32958	chr12	123467980	123470999	ARL6IP4
8863	chr3	8615850	8617879	LINC00312
1363	chr1	38463700	38473229	FHL3
1363	chr1	38463700	38473229	FHL3
9730	chr3	48720050	48724749	NCKIPSD
9730	chr3	48720050	48724749	NCKIPSD
39167	chr16	69956980	69964849	WWP2
12027	chr4	3369830	3373249	RGS12
39686	chr16	88845550	88848899	PIEZO1
46961	chr21	41031300	41035349	B3GALT5
46961	chr21	41031300	41035349	B3GALT5
46961	chr21	41031300	41035349	B3GALT5
46961	chr21	41031300	41035349	B3GALT5
35295	chr14	85995050	85997449	FLRT2
19174	chr7	2516200	2519479	GRIFIN
28421	chr11	3184400	3188049	OSBPL5
28421	chr11	3184400	3188049	OSBPL5
28421	chr11	3184400	3188049	OSBPL5
4112	chr1	208411350	208419599	PLXNA2
43533	chr19	3555000	3559149	MFSD12
43533	chr19	3555000	3559149	MFSD12
25101	chr9	130664580	130670699	ST6GALNAC6
25101	chr9	130664580	130670699	ST6GALNAC6
40796	chr17	37182500	37185399	LRRC37A11P
21811	chr8	22496150	22502729	BIN3-IT1
45020	chr19	50399050	50401829	IL4I1
11982	chr4	2254080	2272749	MXD4
39621	chr16	87869750	87872629	MIR6775
40605	chr17	27922330	27924899	ANKRD13B
46277	chr20	48183180	48185379	PTGIS
19312	chr7	6675330	6679049	ZNF316
34454	chr14	24866250	24871399	NYNRIN
40579	chr17	27219250	27221449	FLOT2
19994	chr7	56157630	56162179	PHKG1
19994	chr7	56157630	56162179	PHKG1
19994	chr7	56157630	56162179	PHKG1
19994	chr7	56157630	56162179	PHKG1
41250	chr17	48285530	48290779	LOC101927230
6726	chr2	97531150	97544649	SEMA4C
17690	chr6	55442680	55445079	HMGCLL1
17690	chr6	55442680	55445079	HMGCLL1
17690	chr6	55442680	55445079	HMGCLL1
17690	chr6	55442680	55445079	HMGCLL1
17690	chr6	55442680	55445079	HMGCLL1
17690	chr6	55442680	55445079	HMGCLL1
17690	chr6	55442680	55445079	HMGCLL1
6699	chr2	97166950	97168949	NEURL3
6699	chr2	97166950	97168949	NEURL3
20155	chr7	73437100	73439479	ELN
20155	chr7	73437100	73439479	ELN
20155	chr7	73437100	73439479	ELN
20155	chr7	73437100	73439479	ELN
20155	chr7	73437100	73439479	ELN
20155	chr7	73437100	73439479	ELN
20155	chr7	73437100	73439479	ELN
20155	chr7	73437100	73439479	ELN
20155	chr7	73437100	73439479	ELN
20155	chr7	73437100	73439479	ELN
20155	chr7	73437100	73439479	ELN
20155	chr7	73437100	73439479	ELN
20155	chr7	73437100	73439479	ELN
5376	chr2	26399650	26403549	GAREML
48341	chr22	44703050	44705549	KIAA1644
41900	chr17	74530550	74537949	CYGB
41900	chr17	74530550	74537949	PRCD
16266	chr5	179218500	179224879	LTC4S
16266	chr5	179218500	179224879	MIR1229
24305	chr9	95240500	95243649	ASPN
24305	chr9	95240500	95243649	ASPN
12531	chr4	53727050	53730379	RASL11B
38794	chr16	51182780	51185929	SALL1
38794	chr16	51182780	51185929	SALL1
29389	chr11	61684600	61688449	RAB3IL1
29389	chr11	61684600	61688449	RAB3IL1
8396	chr2	228735230	228737549	DAW1
1411	chr1	40097380	40107449	HEYL
44879	chr19	47832680	47835349	C5AR2
15872	chr5	159614080	159616849	FABP6
30940	chr12	2161600	2170599	CACNA1C
30940	chr12	2161600	2170599	CACNA1C
30940	chr12	2161600	2170599	CACNA1C
30940	chr12	2161600	2170599	CACNA1C
30940	chr12	2161600	2170599	CACNA1C
30940	chr12	2161600	2170599	CACNA1C
30940	chr12	2161600	2170599	CACNA1C
30940	chr12	2161600	2170599	CACNA1C
30940	chr12	2161600	2170599	CACNA1C
30940	chr12	2161600	2170599	CACNA1C
30940	chr12	2161600	2170599	CACNA1C
30940	chr12	2161600	2170599	CACNA1C
30940	chr12	2161600	2170599	CACNA1C
30940	chr12	2161600	2170599	CACNA1C
30940	chr12	2161600	2170599	CACNA1C
30940	chr12	2161600	2170599	CACNA1C
30940	chr12	2161600	2170599	CACNA1C
30940	chr12	2161600	2170599	CACNA1C
30940	chr12	2161600	2170599	CACNA1C
30940	chr12	2161600	2170599	CACNA1C
30940	chr12	2161600	2170599	CACNA1C
30940	chr12	2161600	2170599	CACNA1C
30940	chr12	2161600	2170599	CACNA1C
26875	chr10	73477180	73480899	C10orf105
1243	chr1	33545900	33548929	AZIN2
1243	chr1	33545900	33548929	AZIN2
1243	chr1	33545900	33548929	AZIN2
1243	chr1	33545900	33548929	AZIN2
1243	chr1	33545900	33548929	AZIN2
1243	chr1	33545900	33548929	AZIN2
1243	chr1	33545900	33548929	AZIN2
15397	chr5	141333430	141341099	PCDH12
34890	chr14	65289330	65295699	SPTB
34890	chr14	65289330	65295699	SPTB
23763	chr9	33444100	33448979	AQP3
45172	chr19	55995130	56007099	NAT14
45172	chr19	55995130	56007099	SSC5D
45172	chr19	55995130	56007099	SSC5D
6531	chr2	86011380	86015849	MIR6071
30462	chr11	117169900	117172299	BACE1
30462	chr11	117169900	117172299	BACE1
18004	chr6	109560150	109562779	LOC100996634
37374	chr15	89437530	89444679	HAPLN3
37374	chr15	89437530	89444679	HAPLN3
32406	chr12	104437900	104440099	GLT8D2
17078	chr6	32013100	32017299	TNXB
29495	chr11	64017530	64021649	PLCB3
29495	chr11	64017530	64021649	PLCB3
4123	chr1	209824600	209827749	LAMB3
4123	chr1	209824600	209827749	LAMB3
4123	chr1	209824600	209827749	LAMB3
36707	chr15	67456480	67461479	SMAD3
21568	chr8	11611830	11616829	C8orf49
15874	chr5	159625800	159627949	FABP6
4132	chr1	209940950	209944399	TRAF3IP3
37014	chr15	75246480	75252379	RPP25
18259	chr6	134209000	134215199	TARID
18259	chr6	134209000	134215199	TCF21
18259	chr6	134209000	134215199	TCF21
45817	chr20	30776400	30779499	TSPY26P
41249	chr17	48275800	48285399	COL1A1
15539	chr5	147285530	147287649	C5orf46
29079	chr11	44589100	44591779	CD82
29079	chr11	44589100	44591779	CD82
7857	chr2	183730680	183733149	FRZB
4140	chr1	210409200	210412599	SERTAD4-AS1
4140	chr1	210409200	210412599	SERTAD4
31073	chr12	5152300	5157749	KCNA5
44842	chr19	47247730	47251029	STRN4
44842	chr19	47247730	47251029	STRN4
44842	chr19	47247730	47251029	FKRP
44842	chr19	47247730	47251029	FKRP
34117	chr13	108921480	108923679	TNFSF13B
34117	chr13	108921480	108923679	TNFSF13B
23954	chr9	44989100	44995329	FAM27C
20512	chr7	100186580	100189149	LRCH4
20512	chr7	100186580	100189149	LRCH4
20512	chr7	100186580	100189149	FBXO24
20512	chr7	100186580	100189149	FBXO24
20512	chr7	100186580	100189149	FBXO24
47763	chr22	30781280	30783879	RNF215
35006	chr14	69439680	69447949	ACTN1
35006	chr14	69439680	69447949	ACTN1
35006	chr14	69439680	69447949	ACTN1
35006	chr14	69439680	69447949	ACTN1-AS1
25451	chr9	137531780	137540679	COL5A1
25451	chr9	137531780	137540679	COL5A1
41944	chr17	75393480	75398079	MIR4316
5413	chr2	27300750	27306029	EMILIN1
24785	chr9	116971900	116979199	MIR455
29611	chr11	66043550	66046349	CNIH2
29611	chr11	66043550	66046349	CNIH2
29611	chr11	66043550	66046349	CNIH2
47171	chr21	46896650	46900049	MIR6815
19978	chr7	55754950	55758499	FKBP9P1
19978	chr7	55754950	55758499	FKBP9P1
19978	chr7	55754950	55758499	FKBP9P1
21144	chr7	142981050	142983149	TMEM139
21144	chr7	142981050	142983149	TMEM139
21144	chr7	142981050	142983149	TMEM139
21144	chr7	142981050	142983149	TMEM139
21144	chr7	142981050	142983149	TMEM139
21144	chr7	142981050	142983149	TMEM139
21144	chr7	142981050	142983149	TMEM139
21144	chr7	142981050	142983149	TMEM139
21144	chr7	142981050	142983149	TMEM139
21144	chr7	142981050	142983149	TMEM139
21144	chr7	142981050	142983149	TMEM139
21144	chr7	142981050	142983149	TMEM139
21144	chr7	142981050	142983149	CASP2
21144	chr7	142981050	142983149	CASP2
21144	chr7	142981050	142983149	CASP2
43567	chr19	4122030	4125449	MAP2K2
10495	chr3	112884680	112886949	LOC101929717
23373	chr8	144095300	144101949	LOC100133669
23373	chr8	144095300	144101949	LY6E
23373	chr8	144095300	144101949	LY6E
19555	chr7	30931550	30963799	AQP1
3911	chr1	203442850	203450729	PRELP
3911	chr1	203442850	203450729	PRELP
41271	chr17	48623900	48626299	SPATA20
41271	chr17	48623900	48626299	SPATA20
41271	chr17	48623900	48626299	SPATA20
20161	chr7	73506250	73510349	LIMK1
7553	chr2	160917780	160921729	PLA2R1
7553	chr2	160917780	160921729	PLA2R1
7553	chr2	160917780	160921729	PLA2R1
36760	chr15	68869780	68875299	CORO2B
40947	chr17	40911550	40916249	RAMP2-AS1
40947	chr17	40911550	40916249	RAMP2-AS1
40947	chr17	40911550	40916249	RAMP2
27458	chr10	98270600	98274249	TLL2
24849	chr9	124054430	124066249	GSN
35952	chr15	30395100	30397899	ULK4P3
2216	chr1	85928950	85932199	DDAH1
18103	chr6	116380450	116382749	FRK
44126	chr19	17351350	17358799	NR2F6
29239	chr11	48000430	48004299	PTPRJ
29239	chr11	48000430	48004299	PTPRJ
10292	chr3	73568850	73571549	LOC101927296
10357	chr3	99355800	99358699	COL8A1
10357	chr3	99355800	99358699	COL8A1
40447	chr17	19246780	19252199	MIR1180
39845	chr17	1413200	1417629	INPP5K
39845	chr17	1413200	1417629	INPP5K
39845	chr17	1413200	1417629	INPP5K
39845	chr17	1413200	1417629	PITPNA-AS1
26976	chr10	75678630	75681549	C10orf55
32296	chr12	95009130	95011499	TMCC3
1543	chr1	43764600	43771079	TIE1
1543	chr1	43764600	43771079	TIE1
40423	chr17	18996000	18998179	LOC79999
40423	chr17	18996000	18998179	LOC388436
32821	chr12	120661350	120705049	PXN
16357	chr6	2849450	2860049	MIR4645
40467	chr17	19647700	19649779	ALDH3A1
40467	chr17	19647700	19649779	ALDH3A1
40467	chr17	19647700	19649779	ALDH3A1
29921	chr11	74430700	74433499	CHRDL2
29921	chr11	74430700	74433499	CHRDL2
29921	chr11	74430700	74433499	CHRDL2
29921	chr11	74430700	74433499	CHRDL2
29921	chr11	74430700	74433499	MIR4696
40806	chr17	37320300	37323799	ARL5C
41967	chr17	75721700	75725629	LOC100132174
35416	chr14	92412380	92414879	FBLN5
47140	chr21	46418450	46424849	LINC00162
25077	chr9	130338900	130343879	FAM129B
31708	chr12	50095700	50101779	FMNL3
31708	chr12	50095700	50101779	FMNL3
45780	chr20	30061380	30064579	DEFB124
45780	chr20	30061380	30064579	REM1
29930	chr11	74864850	74867799	SLCO2B1
29930	chr11	74864850	74867799	SLCO2B1
29930	chr11	74864850	74867799	SLCO2B1
43819	chr19	10734600	10737599	SLC44A2
1568	chr1	44500030	44502999	SLC6A9
1568	chr1	44500030	44502999	SLC6A9
9154	chr3	16214300	16219199	GALNT15
1458	chr1	41485650	41488799	SLFNL1
1458	chr1	41485650	41488799	SLFNL1
1458	chr1	41485650	41488799	SLFNL1
661	chr1	17302480	17307679	MFAP2
661	chr1	17302480	17307679	MFAP2
661	chr1	17302480	17307679	MFAP2
661	chr1	17302480	17307679	MFAP2
28993	chr11	34638700	34640799	EHF
28993	chr11	34638700	34640799	EHF
21899	chr8	25896000	25906579	EBF2
32407	chr12	104442680	104444949	GLT8D2
22230	chr8	48099630	48101929	LOC100287846
42968	chr18	46447530	46483629	SMAD7
34003	chr13	98823450	98827149	RNF113B
37791	chr16	615480	622379	NHLRC4
37791	chr16	615480	622379	NHLRC4
37791	chr16	615480	622379	PIGQ
37791	chr16	615480	622379	PIGQ
34425	chr14	24437800	24440379	DHRS4L2
34425	chr14	24437800	24440379	DHRS4L2
34425	chr14	24437800	24440379	DHRS4L2
11052	chr3	139251700	139260149	RBP1
11052	chr3	139251700	139260149	RBP1
11052	chr3	139251700	139260149	RBP1
12907	chr4	96467100	96472099	UNC5C
40908	chr17	40272480	40274879	KAT2A
40908	chr17	40272480	40274879	HSPB9
40521	chr17	21903780	21907549	FLJ36000
31151	chr12	6929350	6932099	GPR162
31151	chr12	6929350	6932099	GPR162
2120	chr1	71511450	71514779	PTGER3
2120	chr1	71511450	71514779	PTGER3
2120	chr1	71511450	71514779	PTGER3
2120	chr1	71511450	71514779	PTGER3
2120	chr1	71511450	71514779	PTGER3
2120	chr1	71511450	71514779	PTGER3
2120	chr1	71511450	71514779	PTGER3
2120	chr1	71511450	71514779	PTGER3
2120	chr1	71511450	71514779	PTGER3
2120	chr1	71511450	71514779	PTGER3
2120	chr1	71511450	71514779	ZRANB2-AS1
41895	chr17	74484850	74491049	RHBDF2
47852	chr22	33191630	33193749	TIMP3
47984	chr22	37410200	37419729	TST
47984	chr22	37410200	37419729	TST
47984	chr22	37410200	37419729	MPST
47984	chr22	37410200	37419729	MPST
47984	chr22	37410200	37419729	MPST
26115	chr10	25240000	25243879	PRTFDC1
26115	chr10	25240000	25243879	PRTFDC1
42114	chr17	78960750	78962899	CHMP6
39731	chr16	89752180	89754829	CDK10
39731	chr16	89752180	89754829	CDK10
39731	chr16	89752180	89754829	CDK10
39731	chr16	89752180	89754829	CDK10
39731	chr16	89752180	89754829	CDK10
39731	chr16	89752180	89754829	CDK10
41229	chr17	47927150	47930299	TAC4
41229	chr17	47927150	47930299	TAC4
41229	chr17	47927150	47930299	TAC4
41229	chr17	47927150	47930299	TAC4
41229	chr17	47927150	47930299	TAC4
35957	chr15	30684080	30686649	CHRFAM7A
35957	chr15	30684080	30686649	CHRFAM7A
24709	chr9	113799000	113802849	LPAR1
24709	chr9	113799000	113802849	LPAR1
22678	chr8	96225050	96229499	LINC01298
8444	chr2	232263180	232266879	B3GNT7
41076	chr17	43184200	43191049	MIR6784
16189	chr5	176897480	176902629	DBN1
16189	chr5	176897480	176902629	DBN1
15536	chr5	146888050	146890479	DPYSL3
10036	chr3	58520900	58524199	ACOX2
42767	chr18	33765800	33768229	MOCOS
25097	chr9	130587300	130633449	ENG
3197	chr1	156782680	156787499	SH2D2A
3197	chr1	156782680	156787499	SH2D2A
3197	chr1	156782680	156787499	SH2D2A
3197	chr1	156782680	156787499	SH2D2A
3197	chr1	156782680	156787499	SH2D2A
3197	chr1	156782680	156787499	NTRK1
22115	chr8	38328800	38331279	FGFR1
22115	chr8	38328800	38331279	FGFR1
22115	chr8	38328800	38331279	FGFR1
22115	chr8	38328800	38331279	FGFR1
22115	chr8	38328800	38331279	FGFR1
22115	chr8	38328800	38331279	FGFR1
22115	chr8	38328800	38331279	FGFR1
22115	chr8	38328800	38331279	FGFR1
22115	chr8	38328800	38331279	FGFR1
26507	chr10	47150200	47153429	LINC00842
11500	chr3	180587050	180589099	LOC101928882
27894	chr10	116523730	116525899	LOC101927692
37048	chr15	76014630	76018849	ODF3L1
9675	chr3	47026400	47030129	CCDC12
35567	chr14	100257150	100260149	EML1
35567	chr14	100257150	100260149	EML1
25138	chr9	131180980	131184929	CERCAM
25138	chr9	131180980	131184929	CERCAM
14625	chr5	74906280	74908479	ANKDD1B
47393	chr22	21311000	21313549	LOC101928891
7031	chr2	110871300	110875679	MALL
1636	chr1	46631080	46642879	TSPAN1
25170	chr9	131787930	131791149	SH3GLB2
25170	chr9	131787930	131791149	SH3GLB2
25170	chr9	131787930	131791149	SH3GLB2
2559	chr1	112046150	112053599	TMIGD3
2559	chr1	112046150	112053599	ADORA3
2559	chr1	112046150	112053599	ADORA3
2559	chr1	112046150	112053599	ADORA3
4968	chr2	3641780	3645299	COLEC11
4968	chr2	3641780	3645299	COLEC11
4968	chr2	3641780	3645299	COLEC11
4968	chr2	3641780	3645299	COLEC11
4968	chr2	3641780	3645299	COLEC11
4968	chr2	3641780	3645299	COLEC11
48103	chr22	39408730	39412149	APOBEC3C
35707	chr14	104181980	104185699	XRCC3
35707	chr14	104181980	104185699	XRCC3
35707	chr14	104181980	104185699	XRCC3
35707	chr14	104181980	104185699	ZFYVE21
35707	chr14	104181980	104185699	ZFYVE21
21163	chr7	144051100	144054029	OR2A1-AS1
21163	chr7	144051100	144054029	ARHGEF5
27660	chr10	105208180	105213649	CALHM2
27660	chr10	105208180	105213649	CALHM2
27660	chr10	105208180	105213649	CALHM2
21117	chr7	140770430	140772749	TMEM178B
19030	chr7	418400	420829	LOC442497
45213	chr19	57105800	57108279	ZNF71
31783	chr12	52303530	52307479	ACVRL1
31783	chr12	52303530	52307479	ACVRL1
37771	chr16	329150	332349	RGS11
37771	chr16	329150	332349	RGS11
37771	chr16	329150	332349	RGS11
37771	chr16	329150	332349	RGS11
37771	chr16	329150	332349	ARHGDIG
37771	chr16	329150	332349	PDIA2
4163	chr1	211816030	211818329	LOC105748977
45782	chr20	30072030	30075279	LINC00028
31907	chr12	56328430	56330599	DGKA
31907	chr12	56328430	56330599	DGKA
31907	chr12	56328430	56330599	DGKA
31907	chr12	56328430	56330599	DGKA
5470	chr2	28620250	28624599	FLJ31356
24253	chr9	92253050	92256999	UNQ6494
7298	chr2	129073630	129081979	HS6ST1
42654	chr18	22210600	22212879	LOC729950
17569	chr6	45389280	45392129	RUNX2
752	chr1	20395130	20402199	PLA2G5
47117	chr21	45716400	45725599	PFKL
47117	chr21	45716400	45725599	PFKL
25324	chr9	134606280	134617099	RAPGEF1
25324	chr9	134606280	134617099	RAPGEF1
23983	chr9	67789350	67795579	FAM27B
29035	chr11	36397130	36400349	PRR5L
29035	chr11	36397130	36400349	PRR5L
43339	chr19	340000	345099	MIER2
31663	chr12	49210800	49213849	CACNB3
31663	chr12	49210800	49213849	CACNB3
31663	chr12	49210800	49213849	CACNB3
31663	chr12	49210800	49213849	CACNB3
19965	chr7	55254550	55258649	EGFR-AS1
32923	chr12	122514800	122520679	MLXIP
39060	chr16	67183880	67186499	B3GNT9
17769	chr6	75913800	75918479	COL12A1
17769	chr6	75913800	75918479	COL12A1
35770	chr14	105437300	105445099	AHNAK2
16865	chr6	25278050	25281549	LRRC16A
16865	chr6	25278050	25281549	LRRC16A
40451	chr17	19285200	19292579	MFAP4
40451	chr17	19285200	19292579	MFAP4
24761	chr9	116261600	116269629	RGS3
24761	chr9	116261600	116269629	RGS3
3785	chr1	201387900	201391329	TNNI1
40255	chr17	15365450	15369129	CDRT4
31912	chr12	56413300	56416329	IKZF4
40087	chr17	7450000	7454129	TNFSF12
40087	chr17	7450000	7454129	TNFSF12
40087	chr17	7450000	7454129	TNFSF12-TNFSF13
30014	chr11	76837730	76843749	MYO7A
30014	chr11	76837730	76843749	MYO7A
30014	chr11	76837730	76843749	MYO7A
31624	chr12	48115580	48118399	ENDOU
31624	chr12	48115580	48118399	ENDOU
31624	chr12	48115580	48118399	ENDOU
11567	chr3	184490480	184492749	LOC101928992
3791	chr1	201435350	201439779	PHLDA3
3791	chr1	201435350	201439779	PHLDA3
32511	chr12	109022050	109025279	SELPLG
32511	chr12	109022050	109025279	SELPLG
38905	chr16	57124650	57128999	CPNE2
40508	chr17	21277780	21284329	KCNJ12
46523	chr20	58631880	58634679	C20orf197
46523	chr20	58631880	58634679	C20orf197
46523	chr20	58631880	58634679	C20orf197
46523	chr20	58631880	58634679	C20orf197
30083	chr11	85520450	85522779	SYTL2
30083	chr11	85520450	85522779	SYTL2
37153	chr15	79602750	79604949	TMED3
37153	chr15	79602750	79604949	TMED3
37153	chr15	79602750	79604949	TMED3
38555	chr16	29479800	29482979	LOC613038
38555	chr16	29479800	29482979	LOC388242
44417	chr19	35624300	35627449	LGI4
44417	chr19	35624300	35627449	FXYD1
44417	chr19	35624300	35627449	FXYD1
44417	chr19	35624300	35627449	FXYD1
44417	chr19	35624300	35627449	FXYD1
19639	chr7	35755150	35759429	LOC100506725
19639	chr7	35755150	35759429	LOC100506725
28589	chr11	10593950	10596229	LYVE1
22473	chr8	72753250	72757649	MSC
22473	chr8	72753250	72757649	MSC-AS1
22473	chr8	72753250	72757649	MSC-AS1
44617	chr19	41856200	41861329	TGFB1
45143	chr19	54928530	54933049	TTYH1
45143	chr19	54928530	54933049	TTYH1
45143	chr19	54928530	54933049	TTYH1
9729	chr3	48699880	48702529	CELSR3
9729	chr3	48699880	48702529	CELSR3-AS1
39966	chr17	3865800	3869549	ATP2A3
39966	chr17	3865800	3869549	ATP2A3
39966	chr17	3865800	3869549	ATP2A3
39966	chr17	3865800	3869549	ATP2A3
39966	chr17	3865800	3869549	ATP2A3
39966	chr17	3865800	3869549	ATP2A3
39966	chr17	3865800	3869549	ATP2A3
18710	chr6	159028230	159034249	MIR7161
44800	chr19	46317980	46320279	RSPH6A
43761	chr19	8569830	8572549	PRAM1
31102	chr12	6306930	6317449	CD9
42870	chr18	43650750	43653479	PSTPIP2
41235	chr17	48129780	48146849	ITGA3
41235	chr17	48129780	48146849	ITGA3
4014	chr1	205647150	205649579	SLC45A3
44896	chr19	48215350	48218299	EHD2
30469	chr11	117693480	117697129	FXYD2
30469	chr11	117693480	117697129	FXYD2
39867	chr17	1664250	1669849	SERPINF1
16184	chr5	176856900	176860029	GRK6
16184	chr5	176856900	176860029	GRK6
16184	chr5	176856900	176860029	GRK6
38856	chr16	55512650	55515629	MMP2
38856	chr16	55512650	55515629	MMP2
38856	chr16	55512650	55515629	MMP2
38856	chr16	55512650	55515629	MMP2
38856	chr16	55512650	55515629	MMP2
39375	chr16	81523600	81531999	CMIP
36608	chr15	65132230	65141099	PLEKHO2
36608	chr15	65132230	65141099	PLEKHO2
47948	chr22	36550280	36560649	APOL3
47948	chr22	36550280	36560649	APOL3
47948	chr22	36550280	36560649	APOL3
47948	chr22	36550280	36560649	APOL3
44611	chr19	41722600	41727649	AXL
44611	chr19	41722600	41727649	AXL
12502	chr4	48907400	48910049	OCIAD2
12502	chr4	48907400	48910049	OCIAD2
12502	chr4	48907400	48910049	OCIAD2
12502	chr4	48907400	48910049	OCIAD2
12502	chr4	48907400	48910049	OCIAD2
42085	chr17	77924150	77927149	TBC1D16
42085	chr17	77924150	77927149	TBC1D16
42085	chr17	77924150	77927149	TBC1D16
38443	chr16	24679680	24683699	LINC01567
24835	chr9	123655500	123660579	PHF19
3879	chr1	202826980	202829099	LOC148709
41029	chr17	42294050	42296629	UBTF
41029	chr17	42294050	42296629	UBTF
41029	chr17	42294050	42296629	UBTF
41029	chr17	42294050	42296629	UBTF
27412	chr10	97053830	97056349	PDLIM1
36485	chr15	61518700	61522849	RORA
8443	chr2	232258700	232261149	B3GNT7
2528	chr1	110449530	110458549	CSF1
2528	chr1	110449530	110458549	CSF1
2528	chr1	110449530	110458549	CSF1
2528	chr1	110449530	110458549	CSF1
25524	chr9	139437330	139447849	NOTCH1
25524	chr9	139437330	139447849	MIR4674
25524	chr9	139437330	139447849	LINC01573
31513	chr12	32685450	32691049	FGD4
31121	chr12	6491450	6495479	LTBR
37115	chr15	78384000	78386579	SH2D7
34261	chr13	113776180	113779529	F10
46622	chr20	62599330	62604179	ZNF512B
40175	chr17	9936750	9941549	GAS7
47253	chr22	18255350	18261249	BID
47253	chr22	18255350	18261249	BID
47253	chr22	18255350	18261249	BID
47253	chr22	18255350	18261249	BID
47253	chr22	18255350	18261249	BID
47253	chr22	18255350	18261249	BID
47253	chr22	18255350	18261249	BID
47253	chr22	18255350	18261249	LINC00528
40719	chr17	33773800	33776749	SLFN13
32850	chr12	121146950	121149999	UNC119B
44680	chr19	44083200	44086199	XRCC1
44680	chr19	44083200	44086199	PINLYP
44680	chr19	44083200	44086199	PINLYP
35801	chr14	105884680	105889349	LOC100507437
35801	chr14	105884680	105889349	LOC100507437
35801	chr14	105884680	105889349	MTA1
35801	chr14	105884680	105889349	MTA1
4330	chr1	223315330	223317579	TLR5
18912	chr6	168075780	168080629	LOC401286
41205	chr17	47650450	47656379	LOC100288866
41205	chr17	47650450	47656379	NXPH3
37435	chr15	90742880	90746229	SEMA4B
6700	chr2	97172750	97176729	NEURL3
6700	chr2	97172750	97176729	NEURL3
6700	chr2	97172750	97176729	NEURL3
36696	chr15	67356050	67363149	SMAD3
1699	chr1	51761200	51764649	TTC39A
1699	chr1	51761200	51764649	TTC39A
48184	chr22	41630400	41635799	CHADL
23365	chr8	143747450	143752829	JRK
23365	chr8	143747450	143752829	JRK
23365	chr8	143747450	143752829	JRK
23365	chr8	143747450	143752829	PSCA
12679	chr4	76931700	76933899	CXCL9
12679	chr4	76931700	76933899	ART3
25045	chr9	130024600	130031549	GARNL3
25045	chr9	130024600	130031549	GARNL3
25045	chr9	130024600	130031549	GARNL3
33071	chr12	125346630	125349879	SCARB1
33071	chr12	125346630	125349879	SCARB1
22053	chr8	30588030	30590349	GSR
22053	chr8	30588030	30590349	GSR
22053	chr8	30588030	30590349	GSR
22053	chr8	30588030	30590349	GSR
8278	chr2	219522600	219525629	ZNF142
8278	chr2	219522600	219525629	ZNF142
8278	chr2	219522600	219525629	ZNF142
8278	chr2	219522600	219525629	BCS1L
8278	chr2	219522600	219525629	BCS1L
8278	chr2	219522600	219525629	BCS1L
8278	chr2	219522600	219525629	BCS1L
8278	chr2	219522600	219525629	BCS1L
2453	chr1	108505400	108509399	VAV3
2453	chr1	108505400	108509399	VAV3-AS1
44009	chr19	14550280	14552429	PKN1
17614	chr6	46892000	46895299	ADGRF5
1258	chr1	33796280	33800049	MIR3605
43795	chr19	10335780	10342849	S1PR2
43795	chr19	10335780	10342849	MIR4322
23333	chr8	142235950	142240679	SLC45A4
23333	chr8	142235950	142240679	SLC45A4
11221	chr3	153838480	153841699	ARHGEF26-AS1
11221	chr3	153838480	153841699	ARHGEF26
11221	chr3	153838480	153841699	ARHGEF26
11221	chr3	153838480	153841699	ARHGEF26
9788	chr3	49725450	49728529	MST1
9788	chr3	49725450	49728529	RNF123
23369	chr8	143832700	143839429	LYPD2
5785	chr2	43018580	43021449	HAAO
342	chr1	9208200	9215349	MIR34A
6562	chr2	86562450	86565179	REEP1
6562	chr2	86562450	86565179	REEP1
6562	chr2	86562450	86565179	REEP1
6562	chr2	86562450	86565179	REEP1
29457	chr11	63532600	63538629	C11orf95
967	chr1	26122100	26128629	SEPN1
967	chr1	26122100	26128629	SEPN1
20769	chr7	117511850	117514029	CTTNBP2
30921	chr12	1737700	1741629	WNT5B
1540	chr1	43738900	43741499	TMEM125
35765	chr14	105329930	105333649	CEP170B
35765	chr14	105329930	105333649	CEP170B
2961	chr1	150479080	150482279	ECM1
2961	chr1	150479080	150482279	ECM1
2961	chr1	150479080	150482279	ECM1
31980	chr12	58001980	58006499	ARHGEF25
31980	chr12	58001980	58006499	ARHGEF25
31980	chr12	58001980	58006499	ARHGEF25
29127	chr11	45112830	45114949	PRDM11
34656	chr14	51801050	51803149	LINC00640
21162	chr7	143890830	143894249	ARHGEF35
21162	chr7	143890830	143894249	LOC101928605
21162	chr7	143890830	143894249	OR2A1-AS1
6513	chr2	85810200	85819829	VAMP5
36272	chr15	45477430	45481699	SHF
36272	chr15	45477430	45481699	SHF
36272	chr15	45477430	45481699	SHF
16841	chr6	22146150	22149329	NBAT1
25194	chr9	132091800	132102399	LINC01503
25194	chr9	132091800	132102399	LINC01503
47083	chr21	45230130	45233449	AATBC
11826	chr3	195307200	195312779	APOD
26461	chr10	44876850	44882699	CXCL12
26461	chr10	44876850	44882699	CXCL12
26461	chr10	44876850	44882699	CXCL12
26461	chr10	44876850	44882699	CXCL12
26461	chr10	44876850	44882699	CXCL12
47454	chr22	23486750	23489249	RSPH14
47454	chr22	23486750	23489249	RAB36
800	chr1	21834250	21839249	ALPL
800	chr1	21834250	21839249	ALPL
800	chr1	21834250	21839249	ALPL
38922	chr16	57404600	57409299	CX3CL1
38922	chr16	57404600	57409299	CX3CL1
46502	chr20	57578780	57587849	CTSZ
19418	chr7	23281700	23283979	GPNMB
19418	chr7	23281700	23283979	GPNMB
32327	chr12	96039850	96044479	PGAM1P5
8968	chr3	11622000	11627729	VGLL4
12188	chr4	10077900	10083149	MIR3138
37272	chr15	85199880	85202849	WDR73
37272	chr15	85199880	85202849	WDR73
37272	chr15	85199880	85202849	WDR73
37272	chr15	85199880	85202849	WDR73
37272	chr15	85199880	85202849	WDR73
37272	chr15	85199880	85202849	NMB
37272	chr15	85199880	85202849	NMB
52	chr1	1364150	1374399	LOC102724312
52	chr1	1364150	1374399	LOC102724312
52	chr1	1364150	1374399	LOC102724312
52	chr1	1364150	1374399	VWA1
52	chr1	1364150	1374399	VWA1
15691	chr5	151048330	151062179	CTB-113P19.1
32513	chr12	109031080	109033799	SELPLG
32513	chr12	109031080	109033799	MIR4496
17818	chr6	83072500	83074849	TPBG
17818	chr6	83072500	83074849	TPBG
24706	chr9	113340300	113343299	SVEP1
41796	chr17	72965200	72968949	HID1
41796	chr17	72965200	72968949	HID1-AS1
10737	chr3	125818380	125823299	SLC41A3
10737	chr3	125818380	125823299	ALDH1L1-AS1
9821	chr3	50401100	50404079	CYB561D2
9821	chr3	50401100	50404079	CYB561D2
11259	chr3	158389180	158391349	LXN
21774	chr8	21986230	21988529	HR
21774	chr8	21986230	21988529	HR
848	chr1	23747680	23752649	TCEA3
20275	chr7	76026100	76028229	ZP3
40	chr1	1278250	1284929	DVL1
47330	chr22	19701530	19703599	SEPT5
47330	chr22	19701530	19703599	SEPT5-GP1BB
47330	chr22	19701530	19703599	SEPT5
47330	chr22	19701530	19703599	SEPT5-GP1BB
35267	chr14	77841850	77844779	TMED8
35267	chr14	77841850	77844779	SAMD15
45840	chr20	31349750	31351929	DNMT3B
45840	chr20	31349750	31351929	DNMT3B
45840	chr20	31349750	31351929	DNMT3B
45840	chr20	31349750	31351929	DNMT3B
45840	chr20	31349750	31351929	DNMT3B
31175	chr12	7242800	7246999	C1R
25601	chr9	140483050	140486449	ZMYND19
19177	chr7	2555480	2564899	LFNG
19177	chr7	2555480	2564899	LFNG
19177	chr7	2555480	2564899	LFNG
35939	chr15	30118500	30120549	TJP1
35939	chr15	30118500	30120549	TJP1
22191	chr8	42062500	42066599	PLAT
22191	chr8	42062500	42066599	PLAT
12663	chr4	75718580	75720679	BTC
41809	chr17	73086350	73088849	SLC16A5
41809	chr17	73086350	73088849	SLC16A5
34028	chr13	99223400	99225599	STK24
34028	chr13	99223400	99225599	STK24
11333	chr3	169528930	169531679	LRRC34
11333	chr3	169528930	169531679	LRRC34
11333	chr3	169528930	169531679	LRRC34
43557	chr19	4006100	4009449	PIAS4
29560	chr11	65145000	65147299	SLC25A45
29560	chr11	65145000	65147299	SLC25A45
29560	chr11	65145000	65147299	SLC25A45
29560	chr11	65145000	65147299	SLC25A45
40710	chr17	33445150	33448179	RAD51L3-RFFL
40710	chr17	33445150	33448179	RAD51D
40710	chr17	33445150	33448179	RAD51D
40710	chr17	33445150	33448179	RAD51D
40710	chr17	33445150	33448179	RAD51D
40710	chr17	33445150	33448179	RAD51D
40710	chr17	33445150	33448179	FNDC8
34600	chr14	42073350	42078079	LRFN5
39740	chr16	89983730	89986549	MC1R
39740	chr16	89983730	89986549	TUBB3
39740	chr16	89983730	89986549	TUBB3
46495	chr20	57266030	57269729	NPEPL1
46495	chr20	57266030	57269729	NPEPL1
46495	chr20	57266030	57269729	NPEPL1
40790	chr17	37075200	37080279	LINC00672
15178	chr5	135363300	135366949	TGFBI
17031	chr6	31104500	31108249	PSORS1C2
19538	chr7	30789050	30796199	INMT
19538	chr7	30789050	30796199	INMT
19538	chr7	30789050	30796199	INMT-FAM188B
43676	chr19	6278230	6281529	MLLT1
20691	chr7	107640750	107646349	LAMB1
45010	chr19	50263830	50265899	TSKS
18913	chr6	168080650	168085349	LOC401286
18913	chr6	168080650	168085349	LOC441178
31681	chr12	49615900	49618149	TUBA1C
31681	chr12	49615900	49618149	TUBA1C
31681	chr12	49615900	49618149	TUBA1C
31681	chr12	49615900	49618149	TUBA1C
10318	chr3	79066600	79069749	ROBO1
10318	chr3	79066600	79069749	ROBO1
1617	chr1	46083980	46090149	CCDC17
1617	chr1	46083980	46090149	CCDC17
46627	chr20	62692980	62696529	TCEA2
25137	chr9	131158780	131161049	MIR219A2
40573	chr17	27069550	27075129	TRAF4
25091	chr9	130551080	130553149	MIR3960
25091	chr9	130551080	130553149	MIR2861
25091	chr9	130551080	130553149	CDK9
20505	chr7	100064550	100068429	C7orf61
43454	chr19	2239250	2241999	PLEKHJ1
43454	chr19	2239250	2241999	PLEKHJ1
43454	chr19	2239250	2241999	MIR6789
43454	chr19	2239250	2241999	SF3A2
9666	chr3	46919330	46922149	PTH1R
9666	chr3	46919330	46922149	PTH1R
29603	chr11	65781780	65784079	CST6
30779	chr11	128774050	128776549	C11orf45
30779	chr11	128774050	128776549	C11orf45
30779	chr11	128774050	128776549	C11orf45
25310	chr9	134404780	134408329	UCK1
25310	chr9	134404780	134408329	UCK1
25310	chr9	134404780	134408329	UCK1
25310	chr9	134404780	134408329	UCK1
38867	chr16	56279330	56281399	MIR3935
31793	chr12	52473230	52478149	OR7E47P
31793	chr12	52473230	52478149	OR7E47P
31793	chr12	52473230	52478149	OR7E47P
22178	chr8	41502880	41505149	NKX6-3
29278	chr11	57404250	57407299	MIR130A
15578	chr5	148646100	148648549	AFAP1L1
15578	chr5	148646100	148648549	AFAP1L1
1567	chr1	44494400	44498299	SLC6A9
1567	chr1	44494400	44498299	SLC6A9
24071	chr9	72657650	72660249	MAMDC2
24071	chr9	72657650	72660249	MAMDC2
39186	chr16	70470930	70474579	ST3GAL2
47530	chr22	24814580	24822149	ADORA2A
39015	chr16	65153880	65158279	CDH11
39015	chr16	65153880	65158279	CDH11
43939	chr19	13104950	13109599	NFIX
28454	chr11	5642650	5647399	TRIM34
28454	chr11	5642650	5647399	TRIM34
29259	chr11	57001650	57005429	APLNR
29259	chr11	57001650	57005429	APLNR
41547	chr17	62074550	62077329	PRR29-AS1
41547	chr17	62074550	62077329	PRR29
41547	chr17	62074550	62077329	PRR29
41547	chr17	62074550	62077329	PRR29
41547	chr17	62074550	62077329	PRR29
44175	chr19	18427730	18432099	LSM4
44175	chr19	18427730	18432099	LSM4
35557	chr14	100110100	100112949	HHIPL1
35557	chr14	100110100	100112949	HHIPL1
20141	chr7	73132450	73137229	STX1A
20141	chr7	73132450	73137229	STX1A
5356	chr2	25550680	25552729	MIR1301
43869	chr19	11448700	11451599	RAB3D
11985	chr4	2364130	2368249	ZFYVE28
11985	chr4	2364130	2368249	ZFYVE28
31961	chr12	57605750	57608549	NXPH4
27364	chr10	94597730	94599799	EXOC6
20811	chr7	127723950	127726049	MIR593
12270	chr4	20252950	20255299	SLIT2
12270	chr4	20252950	20255299	SLIT2
12270	chr4	20252950	20255299	SLIT2
17756	chr6	73972130	73974349	KHDC1
17418	chr6	41746100	41751649	FRS3
17418	chr6	41746100	41751649	PRICKLE4
33394	chr13	31376380	31378479	LINC00398
30673	chr11	125032700	125038249	PKNOX2-AS1
30673	chr11	125032700	125038249	PKNOX2
15419	chr5	141698350	141708449	SPRY4
15419	chr5	141698350	141708449	SPRY4
15419	chr5	141698350	141708449	SPRY4
15419	chr5	141698350	141708449	SPRY4
15419	chr5	141698350	141708449	LOC101926941
19311	chr7	6654750	6656999	ZNF853
33780	chr13	51100330	51104849	DLEU1-AS1
30505	chr11	118400200	118403399	LOC101929089
30505	chr11	118400200	118403399	LOC101929089
30505	chr11	118400200	118403399	LOC101929089
30505	chr11	118400200	118403399	LOC101929089
30505	chr11	118400200	118403399	LOC101929089
30505	chr11	118400200	118403399	TTC36
30505	chr11	118400200	118403399	TMEM25
30505	chr11	118400200	118403399	TMEM25
30505	chr11	118400200	118403399	TMEM25
30505	chr11	118400200	118403399	TMEM25
30505	chr11	118400200	118403399	TMEM25
30505	chr11	118400200	118403399	TMEM25
16021	chr5	171877230	171883129	SH3PXD2B
16021	chr5	171877230	171883129	SH3PXD2B
26639	chr10	60270980	60274499	BICC1
21180	chr7	148891350	148894549	ZNF282
21180	chr7	148891350	148894549	ZNF282
9662	chr3	46745200	46747329	TMIE
828	chr1	22772430	22776499	ZBTB40
828	chr1	22772430	22776499	ZBTB40
25088	chr9	130521280	130534999	SH2D3C
25088	chr9	130521280	130534999	SH2D3C
21801	chr8	22402980	22412649	SORBS3
9568	chr3	42946430	42949229	ZNF662
9568	chr3	42946430	42949229	ZNF662
48300	chr22	43429100	43433729	LOC100506679
31965	chr12	57627830	57639149	NDUFA4L2
4153	chr1	211499680	211502099	TRAF5
4153	chr1	211499680	211502099	TRAF5
30514	chr11	118508350	118511999	MIR6716
45812	chr20	30594030	30600179	MIR7641-2
45812	chr20	30594030	30600179	CCM2L
23656	chr9	14691900	14694699	ZDHHC21
47808	chr22	32024900	32028199	PISD
38861	chr16	55865700	55867949	CES1
38861	chr16	55865700	55867949	CES1
38861	chr16	55865700	55867949	CES1
48374	chr22	45674430	45677549	UPK3A
48374	chr22	45674430	45677549	UPK3A
45400	chr20	3764050	3767999	SPEF1
45400	chr20	3764050	3767999	CENPB
45400	chr20	3764050	3767999	CDC25B
45400	chr20	3764050	3767999	CDC25B
45400	chr20	3764050	3767999	CDC25B
32691	chr12	113859230	113861499	SDSL
32691	chr12	113859230	113861499	SDSL
47955	chr22	36639250	36642599	APOL2
20535	chr7	100797150	100799279	AP1S1
20535	chr7	100797150	100799279	MIR4653
47758	chr22	30715230	30724399	TBC1D10A
47758	chr22	30715230	30724399	TBC1D10A
41598	chr17	63451000	63454049	CRAT40
17612	chr6	46869350	46871799	LOC101926962
16149	chr5	175790980	175795499	KIAA1191
16149	chr5	175790980	175795499	KIAA1191
16149	chr5	175790980	175795499	KIAA1191
16149	chr5	175790980	175795499	KIAA1191
16149	chr5	175790980	175795499	KIAA1191
16149	chr5	175790980	175795499	KIAA1191
16149	chr5	175790980	175795499	KIAA1191
16149	chr5	175790980	175795499	KIAA1191
16149	chr5	175790980	175795499	KIAA1191
16149	chr5	175790980	175795499	KIAA1191
16149	chr5	175790980	175795499	ARL10
16149	chr5	175790980	175795499	MIR1271
39804	chr17	929130	936549	ABR
2494	chr1	110035350	110038049	CYB561D1
2494	chr1	110035350	110038049	CYB561D1
2494	chr1	110035350	110038049	CYB561D1
2494	chr1	110035350	110038049	CYB561D1
2494	chr1	110035350	110038049	CYB561D1
37196	chr15	81585930	81590649	IL16
22956	chr8	122650880	122653149	HAS2
22956	chr8	122650880	122653149	HAS2-AS1
27563	chr10	102745780	102748749	MRPL43
27563	chr10	102745780	102748749	MRPL43
27563	chr10	102745780	102748749	MRPL43
27563	chr10	102745780	102748749	MRPL43
27563	chr10	102745780	102748749	MRPL43
27563	chr10	102745780	102748749	C10orf2
27563	chr10	102745780	102748749	C10orf2
27563	chr10	102745780	102748749	C10orf2
27563	chr10	102745780	102748749	C10orf2
17643	chr6	52437380	52443429	TRAM2
17643	chr6	52437380	52443429	TRAM2-AS1
17643	chr6	52437380	52443429	TRAM2-AS1
37638	chr15	99557280	99561549	LUNAR1
29944	chr11	75057200	75064599	ARRB1
29944	chr11	75057200	75064599	ARRB1
1659	chr1	47486400	47490699	CYP4X1
28598	chr11	10713430	10715899	MRVI1
28598	chr11	10713430	10715899	MRVI1
28598	chr11	10713430	10715899	MRVI1
28598	chr11	10713430	10715899	MRVI1
28598	chr11	10713430	10715899	MRVI1
40398	chr17	18127080	18130879	LLGL1
13821	chr5	610900	613829	LOC100996325
13821	chr5	610900	613829	CEP72
13236	chr4	141561730	141564199	TNRC18P1
35755	chr14	105153150	105168199	INF2
35755	chr14	105153150	105168199	INF2
35755	chr14	105153150	105168199	INF2
3108	chr1	154838900	154843399	KCNN3
3108	chr1	154838900	154843399	KCNN3
16566	chr6	10719630	10721849	TMEM14C
16566	chr6	10719630	10721849	TMEM14C
8470	chr2	232824900	232827599	DIS3L2
8470	chr2	232824900	232827599	DIS3L2
8470	chr2	232824900	232827599	DIS3L2
8470	chr2	232824900	232827599	DIS3L2
8470	chr2	232824900	232827599	DIS3L2
2536	chr1	110626030	110628749	LINC01397
36703	chr15	67425830	67428379	SMAD3
27492	chr10	99339550	99351749	HOGA1
27492	chr10	99339550	99351749	HOGA1
27492	chr10	99339550	99351749	C10orf62
40859	chr17	38494750	38508029	RARA-AS1
40859	chr17	38494750	38508029	RARA
30584	chr11	120433330	120436549	GRIK4
30584	chr11	120433330	120436549	GRIK4
3749	chr1	196576880	196579049	KCNT2
3749	chr1	196576880	196579049	KCNT2
3749	chr1	196576880	196579049	KCNT2
17072	chr6	31912430	31915029	C2-AS1
17072	chr6	31912430	31915029	CFB
17692	chr6	56110980	56113329	COL21A1
9894	chr3	52526830	52531399	STAB1
7412	chr2	138719980	138723499	HNMT
7412	chr2	138719980	138723499	HNMT
7412	chr2	138719980	138723499	HNMT
43359	chr19	631980	635329	POLRMT
43725	chr19	7991880	7995549	CTXN1
42073	chr17	77706100	77708129	ENPP7
73	chr1	1630200	1633699	MMP23A
9980	chr3	57197200	57200099	IL17RD
21802	chr8	22416050	22425799	SORBS3
39038	chr16	66637000	66643349	CMTM3
39038	chr16	66637000	66643349	CMTM3
39038	chr16	66637000	66643349	CMTM3
39038	chr16	66637000	66643349	CMTM3
32871	chr12	121715700	121718579	CAMKK2
38572	chr16	29984300	29990149	TAOK2
38572	chr16	29984300	29990149	TAOK2
38572	chr16	29984300	29990149	TAOK2
20596	chr7	102151750	102159079	RASA4B
40839	chr17	38169500	38173149	CSF3
40839	chr17	38169500	38173149	CSF3
40839	chr17	38169500	38173149	CSF3
40839	chr17	38169500	38173149	CSF3
40839	chr17	38169500	38173149	CSF3
41416	chr17	56400330	56403349	BZRAP1
41416	chr17	56400330	56403349	BZRAP1
41416	chr17	56400330	56403349	BZRAP1
41416	chr17	56400330	56403349	BZRAP1-AS1
41416	chr17	56400330	56403349	BZRAP1-AS1
41416	chr17	56400330	56403349	BZRAP1-AS1
47546	chr22	24978200	24981499	GGT1
45827	chr20	31068350	31072949	NOL4L
27173	chr10	82287730	82291349	LOC102723703
42197	chr17	80193080	80202149	SLC16A3
42197	chr17	80193080	80202149	SLC16A3
42197	chr17	80193080	80202149	MIR6787
32533	chr12	109214000	109219249	SSH1
22081	chr8	37572380	37575999	LOC101929622
44470	chr19	36911230	36913729	ZFP82
44470	chr19	36911230	36913729	LOC644189
31668	chr12	49317580	49320629	FKBP11
31668	chr12	49317580	49320629	FKBP11
31668	chr12	49317580	49320629	FKBP11
42188	chr17	80007750	80011349	RFNG
42188	chr17	80007750	80011349	GPS1
42188	chr17	80007750	80011349	GPS1
47375	chr22	20789350	20794249	SCARF2
47375	chr22	20789350	20794249	SCARF2
10420	chr3	105084780	105089479	ALCAM
10420	chr3	105084780	105089479	ALCAM
10420	chr3	105084780	105089479	ALCAM
10420	chr3	105084780	105089479	ALCAM
2508	chr1	110253530	110255629	GSTM5
20533	chr7	100767930	100771879	SERPINE1
11536	chr3	183871730	183881999	DVL3
6644	chr2	91843000	91849049	LOC654342
35233	chr14	77293600	77297249	LRRC74A
20602	chr7	102250430	102258499	RASA4
20602	chr7	102250430	102258499	RASA4
20602	chr7	102250430	102258499	RASA4B
43283	chr18	74239700	74241699	LINC00908
7139	chr2	119979950	119983349	STEAP3
7139	chr2	119979950	119983349	STEAP3
7139	chr2	119979950	119983349	STEAP3
1448	chr1	41247330	41252949	KCNQ4
1448	chr1	41247330	41252949	KCNQ4
37231	chr15	83239400	83241649	CPEB1
37231	chr15	83239400	83241649	CPEB1
37231	chr15	83239400	83241649	CPEB1
37231	chr15	83239400	83241649	CPEB1
45806	chr20	30456730	30459829	DUSP15
45806	chr20	30456730	30459829	DUSP15
45806	chr20	30456730	30459829	DUSP15
45806	chr20	30456730	30459829	TTLL9
34413	chr14	23832700	23837099	EFS
34413	chr14	23832700	23837099	EFS
34413	chr14	23832700	23837099	EFS
24136	chr9	80262180	80264999	GNA14
33080	chr12	125549380	125551479	AACS
40946	chr17	40900400	40903449	EZH1
24795	chr9	117372380	117375349	C9orf91
35382	chr14	91280730	91284399	TTC7B
30025	chr11	77733250	77735399	KCTD14
14220	chr5	38444900	38448999	EGFLAM
15319	chr5	139534030	139538399	LOC101929719
44199	chr19	18671680	18674529	KXD1
44199	chr19	18671680	18674529	KXD1
44199	chr19	18671680	18674529	KXD1
22903	chr8	117880680	117882729	RAD21-AS1
9447	chr3	38068800	38072999	PLCD1
9447	chr3	38068800	38072999	PLCD1
9447	chr3	38068800	38072999	PLCD1
45376	chr20	3188850	3191549	DDRGK1
45376	chr20	3188850	3191549	ITPA
45376	chr20	3188850	3191549	ITPA
45376	chr20	3188850	3191549	ITPA
45376	chr20	3188850	3191549	ITPA
45376	chr20	3188850	3191549	ITPA
45376	chr20	3188850	3191549	ITPA
9442	chr3	38034200	38036849	VILL
43544	chr19	3697600	3700979	PIP5K1C
43544	chr19	3697600	3700979	PIP5K1C
43544	chr19	3697600	3700979	PIP5K1C
14300	chr5	52774600	52776749	FST
14300	chr5	52774600	52776749	FST
5224	chr2	18058430	18061879	KCNS3
5224	chr2	18058430	18061879	KCNS3
29726	chr11	68774880	68783429	MRGPRF
29726	chr11	68774880	68783429	MRGPRF
29726	chr11	68774880	68783429	MRGPRF-AS1
27388	chr10	95750930	95755229	PLCE1
27388	chr10	95750930	95755229	PLCE1
34814	chr14	61786400	61790479	PRKCH
12525	chr4	53616380	53619029	ERVMER34-1
12525	chr4	53616380	53619029	ERVMER34-1
4929	chr2	1741650	1745049	PXDN
33398	chr13	31479150	31482679	MEDAG
10496	chr3	112929130	112932849	BOC
10496	chr3	112929130	112932849	BOC
10496	chr3	112929130	112932849	BOC
14324	chr5	53998150	54001899	LOC102467080
39072	chr16	67448850	67451829	ZDHHC1
33369	chr13	30496930	30499999	LINC00572
43942	chr19	13122150	13152599	NFIX
43942	chr19	13122150	13152599	NFIX
25098	chr9	130634630	130641699	AK1
31077	chr12	5538830	5543549	NTF3
31883	chr12	54809800	54815699	ITGA5
31883	chr12	54809800	54815699	LOC102724050
28904	chr11	27013450	27017479	FIBIN
38937	chr16	57566880	57572249	CCDC102A
17090	chr6	32189550	32192749	NOTCH4
227	chr1	6612950	6616399	NOL9
227	chr1	6612950	6616399	TAS1R1
227	chr1	6612950	6616399	TAS1R1
29651	chr11	67053600	67058529	ANKRD13D
29651	chr11	67053600	67058529	ANKRD13D
45346	chr20	1873480	1878799	SIRPA
45346	chr20	1873480	1878799	SIRPA
45346	chr20	1873480	1878799	SIRPA
20486	chr7	99753500	99759099	C7orf43
20486	chr7	99753500	99759099	C7orf43
20486	chr7	99753500	99759099	MIR4658
39687	chr16	88849000	88851699	PIEZO1
1205	chr1	32799480	32803129	MARCKSL1
1205	chr1	32799480	32803129	MARCKSL1
11936	chr4	965550	967649	DGKQ
38513	chr16	28699080	28701229	EIF3C
15640	chr5	149735950	149738699	TCOF1
15640	chr5	149735950	149738699	TCOF1
15640	chr5	149735950	149738699	TCOF1
15640	chr5	149735950	149738699	TCOF1
15640	chr5	149735950	149738699	TCOF1
15640	chr5	149735950	149738699	TCOF1
37252	chr15	84325880	84328129	ADAMTSL3
37252	chr15	84325880	84328129	ADAMTSL3
4361	chr1	224397380	224399499	LOC101927143
3454	chr1	171622700	171626529	MYOC
475	chr1	11996580	12000279	PLOD1
28651	chr11	12028100	12032329	DKK3
28651	chr11	12028100	12032329	DKK3
28651	chr11	12028100	12032329	DKK3
23375	chr8	144119430	144122279	C8orf31
23375	chr8	144119430	144122279	C8orf31
23375	chr8	144119430	144122279	C8orf31
35706	chr14	104176850	104179799	XRCC3
35706	chr14	104176850	104179799	XRCC3
35706	chr14	104176850	104179799	XRCC3
35706	chr14	104176850	104179799	ZFYVE21
35706	chr14	104176850	104179799	ZFYVE21
23358	chr8	143482550	143486499	TSNARE1
23358	chr8	143482550	143486499	TSNARE1
19419	chr7	23284930	23289129	GPNMB
19419	chr7	23284930	23289129	GPNMB
21812	chr8	22502830	22505529	BIN3-IT1
23869	chr9	36162330	36167449	CCIN
10963	chr3	133645080	133647149	C3orf36
26430	chr10	44349250	44352599	LINC00840
42612	chr18	20713900	20718049	CABLES1
42612	chr18	20713900	20718049	CABLES1
42612	chr18	20713900	20718049	CABLES1
24723	chr9	114935780	114939079	SUSD1
24723	chr9	114935780	114939079	SUSD1
24723	chr9	114935780	114939079	SUSD1
18186	chr6	125474050	125478299	TPD52L1
18186	chr6	125474050	125478299	TPD52L1
18186	chr6	125474050	125478299	TPD52L1
18186	chr6	125474050	125478299	TPD52L1
18186	chr6	125474050	125478299	TPD52L1
18186	chr6	125474050	125478299	TPD52L1
20238	chr7	75419350	75422849	CCL26
21237	chr7	150685300	150687849	NOS3
21237	chr7	150685300	150687849	NOS3
21237	chr7	150685300	150687849	NOS3
21237	chr7	150685300	150687849	NOS3
22271	chr8	49531080	49535479	LOC101929217
44757	chr19	45753030	45756949	MARK4
44757	chr19	45753030	45756949	MARK4
6008	chr2	48755500	48760949	STON1-GTF2A1L
6008	chr2	48755500	48760949	STON1
6008	chr2	48755500	48760949	STON1
35227	chr14	77226050	77230329	VASH1
22266	chr8	49466100	49470629	LOC101929268
25551	chr9	139735750	139739279	C9orf172
45123	chr19	54102200	54106099	LOC284379
40930	chr17	40663550	40676249	MIR5010
36999	chr15	75072930	75084079	CSK
36999	chr15	75072930	75084079	CSK
36999	chr15	75072930	75084079	MIR4513
37402	chr15	90197030	90199429	KIF7
16323	chr6	1613200	1615779	FOXC1
48504	chr22	50637580	50641449	SELO
22749	chr8	99951100	99954099	STK3
22749	chr8	99951100	99954099	OSR2
22749	chr8	99951100	99954099	OSR2
22749	chr8	99951100	99954099	OSR2
13877	chr5	2751480	2753729	IRX2
13877	chr5	2751480	2753729	IRX2
13877	chr5	2751480	2753729	C5orf38
13877	chr5	2751480	2753729	C5orf38
13877	chr5	2751480	2753729	C5orf38
13877	chr5	2751480	2753729	C5orf38
13877	chr5	2751480	2753729	C5orf38
13877	chr5	2751480	2753729	C5orf38
44726	chr19	45310700	45314449	BCAM
44726	chr19	45310700	45314449	BCAM
24963	chr9	127556650	127561049	OLFML2A
44835	chr19	47136250	47139099	GNG8
8902	chr3	9808400	9813229	CAMK1
40604	chr17	27908900	27922099	GIT1
40604	chr17	27908900	27922099	GIT1
43572	chr19	4337050	4339749	STAP2
43572	chr19	4337050	4339749	STAP2
19179	chr7	2593030	2596299	BRAT1
19179	chr7	2593030	2596299	IQCE
19179	chr7	2593030	2596299	IQCE
19179	chr7	2593030	2596299	IQCE
19179	chr7	2593030	2596299	IQCE
19179	chr7	2593030	2596299	IQCE
15673	chr5	150464000	150467779	TNIP1
15673	chr5	150464000	150467779	TNIP1
15673	chr5	150464000	150467779	TNIP1
41499	chr17	59470100	59483429	TBX2-AS1
41499	chr17	59470100	59483429	TBX2-AS1
41499	chr17	59470100	59483429	TBX2-AS1
41499	chr17	59470100	59483429	TBX2
640	chr1	16860000	16863249	FAM231B
5676	chr2	38096700	38103849	LINC00211
39293	chr16	75269900	75292899	BCAR1
39293	chr16	75269900	75292899	BCAR1
39293	chr16	75269900	75292899	BCAR1
21709	chr8	19459030	19461129	CSGALNACT1
27253	chr10	90710550	90712829	ACTA2
9390	chr3	37211450	37213699	LRRFIP2
9390	chr3	37211450	37213699	LRRFIP2
8699	chr2	240120100	240124199	MGC16025
412	chr1	10489280	10492149	APITD1
412	chr1	10489280	10492149	APITD1-CORT
412	chr1	10489280	10492149	APITD1-CORT
412	chr1	10489280	10492149	APITD1-CORT
412	chr1	10489280	10492149	APITD1
412	chr1	10489280	10492149	APITD1-CORT
412	chr1	10489280	10492149	APITD1-CORT
41243	chr17	48221530	48234149	PPP1R9B
36637	chr15	65713350	65715399	IGDCC4
23425	chr8	145055630	145062279	PARP10
28037	chr10	124219500	124223949	HTRA1
28054	chr10	125851250	125854979	CHST15
28054	chr10	125851250	125854979	CHST15
28054	chr10	125851250	125854979	CHST15
28054	chr10	125851250	125854979	CHST15
36979	chr15	74605830	74613699	CCDC33
36979	chr15	74605830	74613699	CCDC33
13423	chr4	153599850	153602349	TMEM154
28535	chr11	8822830	8833899	ST5
28535	chr11	8822830	8833899	ST5
32990	chr12	124154900	124157029	TCTN2
32990	chr12	124154900	124157029	TCTN2
11340	chr3	170136400	170139099	CLDN11
11340	chr3	170136400	170139099	CLDN11
11340	chr3	170136400	170139099	MIR6828
28340	chr11	1883100	1888129	MIR4298
28340	chr11	1883100	1888129	LSP1
28340	chr11	1883100	1888129	LSP1
21011	chr7	135431400	135436099	FAM180A
4362	chr1	224402250	224406379	LOC101927143
4362	chr1	224402250	224406379	LOC101927164
43859	chr19	11298680	11311249	KANK2
43859	chr19	11298680	11311249	KANK2
45948	chr20	34739750	34743979	EPB41L1
2786	chr1	121103250	121105249	SRGAP2D
2786	chr1	121103250	121105249	SRGAP2B
30403	chr11	114164050	114169479	NNMT
4474	chr1	228335750	228340629	GJC2
29490	chr11	63973030	63977249	FERMT3
29490	chr11	63973030	63977249	FERMT3
15944	chr5	169723350	169725799	LCP2
46089	chr20	42141580	42144579	L3MBTL1
35762	chr14	105270430	105273599	ZBTB42
23442	chr8	145493050	145496779	SCX
26798	chr10	71811300	71814729	H2AFY2
40090	chr17	7481950	7484179	SNORD10
40090	chr17	7481950	7484179	SNORA67
40090	chr17	7481950	7484179	CD68
40090	chr17	7481950	7484179	CD68
40090	chr17	7481950	7484179	MPDU1
40090	chr17	7481950	7484179	MPDU1
37922	chr16	3161450	3163899	ZNF205-AS1
37922	chr16	3161450	3163899	ZNF205-AS1
37922	chr16	3161450	3163899	ZNF205
37922	chr16	3161450	3163899	ZNF205
37922	chr16	3161450	3163899	ZNF205
19674	chr7	37392400	37395679	ELMO1
25965	chr10	15411000	15413399	FAM171A1
11290	chr3	159705850	159707899	IL12A
29526	chr11	64641900	64652499	EHD1
29526	chr11	64641900	64652499	EHD1
29526	chr11	64641900	64652499	EHD1
44413	chr19	35527900	35534749	HPN
44413	chr19	35527900	35534749	HPN
39064	chr16	67225350	67228079	EXOC3L1
39064	chr16	67225350	67228079	E2F4
37805	chr16	836950	839799	RPUSD1
37805	chr16	836950	839799	CHTF18
39635	chr16	87995830	88001749	BANP
13314	chr4	148400500	148404849	EDNRA
13314	chr4	148400500	148404849	EDNRA
13314	chr4	148400500	148404849	EDNRA
13314	chr4	148400500	148404849	EDNRA
38519	chr16	28760450	28763299	NPIPB9
38519	chr16	28760450	28763299	NPIPB9
36302	chr15	48935750	48939749	FBN1
43581	chr19	4454200	4459199	UBXN6
43581	chr19	4454200	4459199	UBXN6
48540	chr22	51220550	51224779	RABL2B
48540	chr22	51220550	51224779	RABL2B
48540	chr22	51220550	51224779	RABL2B
48540	chr22	51220550	51224779	RABL2B
48540	chr22	51220550	51224779	RABL2B
48540	chr22	51220550	51224779	RABL2B
48540	chr22	51220550	51224779	RABL2B
[truncated: 388 more rows]

## Sheet: Supplementary Table 3B
Supplementary Table 3B: Genes in the vicinity of hypoacetylated regions using +/-5kb window from transcription start site
Region ID*	Chromosome	Region Start†	Region End†	Gene			*: Regions were sorted by non-adjusted p-value from largest to smallest;
14749	chr5	86707100	86709649	CCNH			†: Genomic coordinates were indicated using human genome assembly GRCh37/hg19.
14749	chr5	86707100	86709649	CCNH
41308	chr17	49195050	49200529	SPAG9
41308	chr17	49195050	49200529	SPAG9
41308	chr17	49195050	49200529	SPAG9
30197	chr11	95521280	95525179	FAM76B
30197	chr11	95521280	95525179	CEP57
30197	chr11	95521280	95525179	CEP57
30197	chr11	95521280	95525179	CEP57
12766	chr4	83820850	83823399	THAP9-AS1
12766	chr4	83820850	83823399	THAP9-AS1
12766	chr4	83820850	83823399	THAP9-AS1
12766	chr4	83820850	83823399	THAP9
11293	chr3	160116030	160119079	IFT80
11293	chr3	160116030	160119079	IFT80
11293	chr3	160116030	160119079	SMC4
11293	chr3	160116030	160119079	SMC4
11293	chr3	160116030	160119079	SMC4
11293	chr3	160116030	160119079	MIR15B
11293	chr3	160116030	160119079	MIR16-2
2643	chr1	115123050	115125779	BCAS2
16914	chr6	27098480	27101999	HIST1H2BJ
16914	chr6	27098480	27101999	HIST1H2AG
46331	chr20	48786550	48790399	LINC01273
45894	chr20	33290580	33295849	TP53INP2
16876	chr6	26042500	26047079	HIST1H2BB
16876	chr6	26042500	26047079	HIST1H3C
6624	chr2	88925080	88929279	EIF2AK3
41187	chr17	46968400	46971779	ATP5G1
41187	chr17	46968400	46971779	ATP5G1
45612	chr20	18487180	18489799	SEC23B
45612	chr20	18487180	18489799	SEC23B
45612	chr20	18487180	18489799	SEC23B
45612	chr20	18487180	18489799	SEC23B
45612	chr20	18487180	18489799	SEC23B
19776	chr7	44644550	44648249	OGDH
19776	chr7	44644550	44648249	OGDH
19776	chr7	44644550	44648249	OGDH
26027	chr10	18945680	18949949	ARL5B
7787	chr2	178075930	178079279	HNRNPA3
7787	chr2	178075930	178079279	MIR4444-1
7787	chr2	178075930	178079279	MIR4444-2
43726	chr19	8007030	8010099	TIMM44
20694	chr7	108164050	108168149	PNPLA8
20694	chr7	108164050	108168149	PNPLA8
20694	chr7	108164050	108168149	PNPLA8
20694	chr7	108164050	108168149	PNPLA8
20694	chr7	108164050	108168149	PNPLA8
20694	chr7	108164050	108168149	PNPLA8
28468	chr11	6501250	6504329	ARFIP2
28468	chr11	6501250	6504329	ARFIP2
28468	chr11	6501250	6504329	ARFIP2
28468	chr11	6501250	6504329	ARFIP2
28468	chr11	6501250	6504329	TIMM10B
7958	chr2	198316750	198319629	COQ10B
29053	chr11	43700780	43703729	HSD17B12
4166	chr1	212207230	212210329	INTS7
4166	chr1	212207230	212210329	INTS7
4166	chr1	212207230	212210329	INTS7
4166	chr1	212207230	212210329	INTS7
4166	chr1	212207230	212210329	INTS7
4166	chr1	212207230	212210329	DTL
4166	chr1	212207230	212210329	DTL
4166	chr1	212207230	212210329	DTL
30262	chr11	105946580	105949829	KBTBD3
30262	chr11	105946580	105949829	KBTBD3
30262	chr11	105946580	105949829	AASDHPPT
2932	chr1	149855980	149861129	HIST2H2BE
2932	chr1	149855980	149861129	HIST2H2AC
2932	chr1	149855980	149861129	HIST2H2AB
34390	chr14	23386500	23389999	RBM23
34390	chr14	23386500	23389999	RBM23
34390	chr14	23386500	23389999	RBM23
34390	chr14	23386500	23389999	RBM23
34390	chr14	23386500	23389999	PRMT5-AS1
34390	chr14	23386500	23389999	PRMT5-AS1
19437	chr7	25163400	25166599	CYCS
39180	chr16	70379250	70382749	LOC100506083
39180	chr16	70379250	70382749	DDX19A
35134	chr14	74549730	74553049	ALDH6A1
35134	chr14	74549730	74553049	ALDH6A1
35134	chr14	74549730	74553049	ALDH6A1
35134	chr14	74549730	74553049	LIN52
32487	chr12	107483850	107489149	CRY1
20359	chr7	90031780	90037449	CLDN12
20359	chr7	90031780	90037449	CLDN12
20359	chr7	90031780	90037449	CLDN12
32038	chr12	64614730	64617529	C12orf66
32038	chr12	64614730	64617529	C12orf66
32038	chr12	64614730	64617529	C12orf66
28934	chr11	31530280	31532499	IMMP1L
28934	chr11	31530280	31532499	IMMP1L
28934	chr11	31530280	31532499	ELP4
28934	chr11	31530280	31532499	ELP4
28934	chr11	31530280	31532499	ELP4
26636	chr10	60025750	60030249	IPMK
26636	chr10	60025750	60030249	CISD1
9936	chr3	53924500	53927429	SELK
13582	chr4	170540050	170543179	CLCN3
13582	chr4	170540050	170543179	CLCN3
13582	chr4	170540050	170543179	CLCN3
35203	chr14	76126050	76128949	C14orf1
35203	chr14	76126050	76128949	TTLL5
20059	chr7	66458530	66463079	SBDS
20059	chr7	66458530	66463079	TYW1
16854	chr6	24774180	24777029	GMNN
16854	chr6	24774180	24777029	GMNN
16854	chr6	24774180	24777029	GMNN
16854	chr6	24774180	24777029	GMNN
10407	chr3	101404050	101407599	RPL24
3729	chr1	186342700	186346079	TPR
3729	chr1	186342700	186346079	C1orf27
3729	chr1	186342700	186346079	C1orf27
3729	chr1	186342700	186346079	C1orf27
20785	chr7	121782830	121785329	AASS
45714	chr20	23337250	23344629	LINC01431
45714	chr20	23337250	23344629	GZF1
11032	chr3	138311730	138314099	CEP70
11032	chr3	138311730	138314099	CEP70
11032	chr3	138311730	138314099	CEP70
11032	chr3	138311730	138314099	CEP70
11032	chr3	138311730	138314099	CEP70
34332	chr14	20809400	20812999	RPPH1
34332	chr14	20809400	20812999	PARP2
34332	chr14	20809400	20812999	PARP2
14371	chr5	56203980	56207249	SETD9
14371	chr5	56203980	56207249	SETD9
34851	chr14	64106650	64109999	WDR89
34851	chr14	64106650	64109999	WDR89
34851	chr14	64106650	64109999	WDR89
17554	chr6	44212400	44216449	HSP90AB1
17554	chr6	44212400	44216449	HSP90AB1
17554	chr6	44212400	44216449	HSP90AB1
17554	chr6	44212400	44216449	HSP90AB1
17554	chr6	44212400	44216449	HSP90AB1
31672	chr12	49410880	49414529	PRKAG1
31672	chr12	49410880	49414529	PRKAG1
31672	chr12	49410880	49414529	PRKAG1
34565	chr14	35450350	35453499	SRP54
34565	chr14	35450350	35453499	SRP54
45221	chr19	57790350	57793399	ZNF460
2928	chr1	149802600	149805849	HIST2H4A
2928	chr1	149802600	149805849	HIST2H4B
23030	chr8	125485430	125488729	RNF139-AS1
23030	chr8	125485430	125488729	RNF139-AS1
23030	chr8	125485430	125488729	RNF139
3301	chr1	162759150	162761899	HSD17B7
3301	chr1	162759150	162761899	HSD17B7
3301	chr1	162759150	162761899	HSD17B7
44170	chr19	18312630	18317299	RAB3A
12477	chr4	47486280	47488729	ATP10D
12454	chr4	41991530	41994029	SLC30A9
44454	chr19	36543800	36546879	THAP8
44454	chr19	36543800	36546879	WDR62
44454	chr19	36543800	36546879	WDR62
48240	chr22	42485200	42488429	NDUFA6
48240	chr22	42485200	42488429	NDUFA6-AS1
14522	chr5	68512750	68516299	MRPS36
15151	chr5	134072330	134075629	CAMLG
20696	chr7	108208730	108211979	THAP5
20696	chr7	108208730	108211979	THAP5
20696	chr7	108208730	108211979	THAP5
20696	chr7	108208730	108211979	THAP5
20696	chr7	108208730	108211979	THAP5
20696	chr7	108208730	108211979	DNAJB9
3426	chr1	169452300	169458129	SLC19A2
26391	chr10	38643700	38646499	HSD17B7P2
31918	chr12	56508530	56515129	RPL41
31918	chr12	56508530	56515129	RPL41
31918	chr12	56508530	56515129	ZC3H10
31918	chr12	56508530	56515129	ZC3H10
31918	chr12	56508530	56515129	ZC3H10
44783	chr19	46086030	46090279	OPA3
44783	chr19	46086030	46090279	OPA3
2851	chr1	145505750	145509029	RBM8A
16998	chr6	30537730	30540649	ABCF1
16998	chr6	30537730	30540649	ABCF1
1721	chr1	52869200	52871549	ORC1
1721	chr1	52869200	52871549	ORC1
1721	chr1	52869200	52871549	ORC1
1721	chr1	52869200	52871549	PRPF38A
26127	chr10	27442050	27445129	YME1L1
26127	chr10	27442050	27445129	YME1L1
26127	chr10	27442050	27445129	YME1L1
26127	chr10	27442050	27445129	MASTL
26127	chr10	27442050	27445129	MASTL
26127	chr10	27442050	27445129	MASTL
25907	chr10	13340280	13345949	PHYH
25907	chr10	13340280	13345949	PHYH
37034	chr15	75741850	75749529	SIN3A
37034	chr15	75741850	75749529	SIN3A
37034	chr15	75741850	75749529	SIN3A
6354	chr2	71293880	71297199	NAGK
44600	chr19	41254350	41259049	C19orf54
44600	chr19	41254350	41259049	SNRPA
24978	chr9	128002200	128005329	HSPA5
15240	chr5	137877280	137881299	ETF1
15240	chr5	137877280	137881299	ETF1
15240	chr5	137877280	137881299	ETF1
15240	chr5	137877280	137881299	ETF1
15240	chr5	137877280	137881299	ETF1
30070	chr11	82903300	82906729	ANKRD42
30070	chr11	82903300	82906729	ANKRD42
30070	chr11	82903300	82906729	ANKRD42
30070	chr11	82903300	82906729	ANKRD42
30070	chr11	82903300	82906729	ANKRD42
30070	chr11	82903300	82906729	ANKRD42
30070	chr11	82903300	82906729	ANKRD42
16873	chr6	26019880	26023279	HIST1H1A
16873	chr6	26019880	26023279	HIST1H3A
16873	chr6	26019880	26023279	HIST1H4A
20827	chr7	128377850	128380979	CALU
20827	chr7	128377850	128380979	CALU
20827	chr7	128377850	128380979	CALU
20827	chr7	128377850	128380979	CALU
20827	chr7	128377850	128380979	CALU
20827	chr7	128377850	128380979	CALU
33715	chr13	48610950	48613549	NUDT15
33715	chr13	48610950	48613549	NUDT15
35542	chr14	99945300	99949079	SETD3
35542	chr14	99945300	99949079	SETD3
35542	chr14	99945300	99949079	CCNK
11190	chr3	150478780	150482729	SIAH2
2929	chr1	149812300	149815879	HIST2H3A
2929	chr1	149812300	149815879	HIST2H3C
2929	chr1	149812300	149815879	HIST2H2AA4
2929	chr1	149812300	149815879	HIST2H2AA3
7473	chr2	157187850	157192579	NR4A2
3774	chr1	201139130	201141449	TMEM9
16989	chr6	30179830	30183249	TRIM26
16989	chr6	30179830	30183249	TRIM26
18033	chr6	111301880	111304579	RPF2
18033	chr6	111301880	111304579	RPF2
24290	chr9	94181880	94188179	NFIL3
24290	chr9	94181880	94188179	NFIL3
24290	chr9	94181880	94188179	NFIL3
16997	chr6	30522000	30526299	GNL1
16997	chr6	30522000	30526299	PRR3
16997	chr6	30522000	30526299	PRR3
1207	chr1	32858550	32861679	BSDC1
1207	chr1	32858550	32861679	BSDC1
1207	chr1	32858550	32861679	BSDC1
1207	chr1	32858550	32861679	BSDC1
1207	chr1	32858550	32861679	BSDC1
1207	chr1	32858550	32861679	BSDC1
26770	chr10	70882300	70885579	VPS26A
26770	chr10	70882300	70885579	VPS26A
43647	chr19	5789950	5792499	DUS3L
43647	chr19	5789950	5792499	DUS3L
31325	chr12	16033950	16036799	STRAP
13091	chr4	120986830	120990279	MAD2L1
11593	chr3	185654280	185657429	TRA2B
11593	chr3	185654280	185657429	TRA2B
40929	chr17	40609350	40612299	ATP6V0A1
40929	chr17	40609350	40612299	ATP6V0A1
40929	chr17	40609350	40612299	ATP6V0A1
34407	chr14	23753830	23756999	HOMEZ
41822	chr17	73284200	73286999	SLC25A19
41822	chr17	73284200	73286999	SLC25A19
41822	chr17	73284200	73286999	SLC25A19
15341	chr5	139942480	139945699	APBB3
15341	chr5	139942480	139945699	APBB3
15341	chr5	139942480	139945699	APBB3
15341	chr5	139942480	139945699	APBB3
15341	chr5	139942480	139945699	MIR6831
15341	chr5	139942480	139945699	SLC35A4
42545	chr18	13725030	13728279	FAM210A
42545	chr18	13725030	13728279	FAM210A
42545	chr18	13725030	13728279	RNMT
42545	chr18	13725030	13728279	RNMT
29669	chr11	67271250	67277529	PITPNM1
29669	chr11	67271250	67277529	PITPNM1
29669	chr11	67271250	67277529	CDK2AP2
29669	chr11	67271250	67277529	CDK2AP2
29669	chr11	67271250	67277529	CDK2AP2
27535	chr10	101490550	101493629	COX15
27535	chr10	101490550	101493629	COX15
27535	chr10	101490550	101493629	CUTC
2953	chr1	150265180	150267629	MRPS21
2953	chr1	150265180	150267629	MRPS21
16885	chr6	26194950	26200699	HIST1H3D
16885	chr6	26194950	26200699	HIST1H2AD
16885	chr6	26194950	26200699	HIST1H2BF
17054	chr6	31586730	31589999	AIF1
17054	chr6	31586730	31589999	PRRC2A
17054	chr6	31586730	31589999	PRRC2A
17054	chr6	31586730	31589999	SNORA38
21114	chr7	140622700	140627149	BRAF
9156	chr3	16305030	16308949	DPH3
9156	chr3	16305030	16308949	DPH3
9156	chr3	16305030	16308949	OXNAD1
41466	chr17	58040800	58043949	RNFT1
41466	chr17	58040800	58043949	LOC101927755
41466	chr17	58040800	58043949	LOC101927755
2551	chr1	111505080	111507429	LRIF1
2551	chr1	111505080	111507429	LRIF1
14259	chr5	41903000	41906549	C5orf51
12401	chr4	39459100	39462049	RPL9
12401	chr4	39459100	39462049	RPL9
12401	chr4	39459100	39462049	LIAS
12401	chr4	39459100	39462049	LIAS
12401	chr4	39459100	39462049	LIAS
12401	chr4	39459100	39462049	LIAS
12401	chr4	39459100	39462049	LIAS
12953	chr4	103788330	103791679	UBE2D3
12953	chr4	103788330	103791679	UBE2D3
12953	chr4	103788330	103791679	CISD2
16874	chr6	26024500	26028279	HIST1H4A
16874	chr6	26024500	26028279	HIST1H4B
45079	chr19	52691300	52696899	PPP2R1A
45079	chr19	52691300	52696899	PPP2R1A
8274	chr2	219431680	219440029	USP37
8274	chr2	219431680	219440029	RQCD1
8274	chr2	219431680	219440029	RQCD1
8274	chr2	219431680	219440029	RQCD1
8274	chr2	219431680	219440029	RQCD1
31155	chr12	6959800	6963099	CDCA3
31155	chr12	6959800	6963099	CDCA3
31155	chr12	6959800	6963099	CDCA3
31155	chr12	6959800	6963099	CDCA3
31155	chr12	6959800	6963099	CDCA3
31155	chr12	6959800	6963099	USP5
31155	chr12	6959800	6963099	USP5
34765	chr14	58710580	58712879	PSMA3
34765	chr14	58710580	58712879	PSMA3
34765	chr14	58710580	58712879	PSMA3
29838	chr11	72144250	72147049	CLPB
29838	chr11	72144250	72147049	CLPB
29838	chr11	72144250	72147049	CLPB
29838	chr11	72144250	72147049	CLPB
43447	chr19	2162350	2173399	DOT1L
17005	chr6	30683800	30692999	MDC1
17005	chr6	30683800	30692999	TUBB
17005	chr6	30683800	30692999	TUBB
17005	chr6	30683800	30692999	TUBB
17005	chr6	30683800	30692999	TUBB
17005	chr6	30683800	30692999	TUBB
17005	chr6	30683800	30692999	TUBB
17005	chr6	30683800	30692999	TUBB
3485	chr1	174967200	174970449	CACYBP
3485	chr1	174967200	174970449	CACYBP
31142	chr12	6770980	6773229	ING4
31142	chr12	6770980	6773229	ING4
31142	chr12	6770980	6773229	ING4
31142	chr12	6770980	6773229	ING4
31142	chr12	6770980	6773229	ING4
31142	chr12	6770980	6773229	ING4
48239	chr22	42474000	42477349	SMDT1
40887	chr17	39843500	39847499	EIF1
23593	chr9	6756250	6759779	KDM4C
23593	chr9	6756250	6759779	KDM4C
23593	chr9	6756250	6759779	KDM4C
23593	chr9	6756250	6759779	KDM4C
23593	chr9	6756250	6759779	KDM4C
23593	chr9	6756250	6759779	KDM4C
1584	chr1	45137600	45141329	TMEM53
1584	chr1	45137600	45141329	TMEM53
1584	chr1	45137600	45141329	TMEM53
1584	chr1	45137600	45141329	TMEM53
1584	chr1	45137600	45141329	C1orf228
16933	chr6	27803680	27807779	HIST1H2AK
16933	chr6	27803680	27807779	HIST1H2BN
17844	chr6	88298500	88301199	RARS2
17844	chr6	88298500	88301199	ORC3
17844	chr6	88298500	88301199	ORC3
17844	chr6	88298500	88301199	ORC3
31220	chr12	10363050	10367449	GABARAPL1
3464	chr1	172500350	172503929	SUCO
3464	chr1	172500350	172503929	SUCO
3464	chr1	172500350	172503929	SUCO
3464	chr1	172500350	172503929	SUCO
31305	chr12	14921630	14924699	HIST4H4
31305	chr12	14921630	14924699	H2AFJ
31305	chr12	14921630	14924699	H2AFJ
13581	chr4	170532480	170534729	NEK1
13581	chr4	170532480	170534729	NEK1
13581	chr4	170532480	170534729	NEK1
13581	chr4	170532480	170534729	NEK1
13581	chr4	170532480	170534729	NEK1
33750	chr13	49821100	49823379	CDADC1
33750	chr13	49821100	49823379	CDADC1
33750	chr13	49821100	49823379	CDADC1
12582	chr4	57251850	57255449	AASDH
12582	chr4	57251850	57255449	AASDH
12582	chr4	57251850	57255449	AASDH
12582	chr4	57251850	57255449	AASDH
12582	chr4	57251850	57255449	AASDH
12582	chr4	57251850	57255449	AASDH
43822	chr19	10762880	10767749	ILF3-AS1
43822	chr19	10762880	10767749	ILF3
43822	chr19	10762880	10767749	ILF3
43822	chr19	10762880	10767749	ILF3
43822	chr19	10762880	10767749	ILF3
43822	chr19	10762880	10767749	ILF3
31943	chr12	57038200	57041549	ATP5B
31943	chr12	57038200	57041549	SNORD59B
31943	chr12	57038200	57041549	SNORD59A
28445	chr11	4114550	4117599	RRM1
27531	chr10	101186380	101192149	GOT1
16152	chr5	175814330	175818129	NOP16
16152	chr5	175814330	175818129	NOP16
16152	chr5	175814330	175818129	NOP16
16152	chr5	175814330	175818129	NOP16
16152	chr5	175814330	175818129	NOP16
16152	chr5	175814330	175818129	NOP16
16152	chr5	175814330	175818129	NOP16
16152	chr5	175814330	175818129	HIGD2A
2318	chr1	93644380	93647529	TMED5
2318	chr1	93644380	93647529	TMED5
2318	chr1	93644380	93647529	TMED5
2318	chr1	93644380	93647529	CCDC18
2318	chr1	93644380	93647529	CCDC18
40121	chr17	8088050	8097029	MIR4521
40121	chr17	8088050	8097029	C17orf59
34445	chr14	24710250	24713299	TINF2
34445	chr14	24710250	24713299	TINF2
15781	chr5	156568350	156571779	MED7
15781	chr5	156568350	156571779	MED7
23741	chr9	33075350	33078029	SMU1
580	chr1	15849400	15854699	CASP9
580	chr1	15849400	15854699	CASP9
580	chr1	15849400	15854699	CASP9
580	chr1	15849400	15854699	CASP9
580	chr1	15849400	15854699	CASP9
580	chr1	15849400	15854699	DNAJC16
580	chr1	15849400	15854699	DNAJC16
580	chr1	15849400	15854699	DNAJC16
16881	chr6	26155600	26160029	HIST1H1E
16881	chr6	26155600	26160029	HIST1H2BD
16881	chr6	26155600	26160029	HIST1H2BD
33180	chr13	20206400	20209349	MPHOSPH8
45443	chr20	5092300	5095049	TMEM230
45443	chr20	5092300	5095049	TMEM230
45443	chr20	5092300	5095049	TMEM230
45443	chr20	5092300	5095049	TMEM230
44585	chr19	40968980	40974449	BLVRB
44585	chr19	40968980	40974449	SPTBN4
40126	chr17	8149880	8153929	CTC1
40126	chr17	8149880	8153929	CTC1
40126	chr17	8149880	8153929	PFAS
18600	chr6	153322330	153325399	MTRF1L
18600	chr6	153322330	153325399	MTRF1L
18600	chr6	153322330	153325399	MTRF1L
18600	chr6	153322330	153325399	MTRF1L
18600	chr6	153322330	153325399	MTRF1L
18600	chr6	153322330	153325399	MTRF1L
18600	chr6	153322330	153325399	MTRF1L
40623	chr17	28442830	28445199	NSRP1
40623	chr17	28442830	28445199	NSRP1
40623	chr17	28442830	28445199	MIR423
40623	chr17	28442830	28445199	MIR3184
2116	chr1	70875700	70878049	CTH
2116	chr1	70875700	70878049	CTH
2116	chr1	70875700	70878049	CTH
47902	chr22	35693400	35697599	TOM1
47902	chr22	35693400	35697599	TOM1
47902	chr22	35693400	35697599	TOM1
47902	chr22	35693400	35697599	TOM1
47902	chr22	35693400	35697599	TOM1
47902	chr22	35693400	35697599	TOM1
20803	chr7	127290500	127293499	SND1
43913	chr19	12720880	12723129	ZNF490
43913	chr19	12720880	12723129	ZNF791
36153	chr15	41522030	41524949	EXD1
36153	chr15	41522030	41524949	EXD1
36153	chr15	41522030	41524949	CHP1
16916	chr6	27112600	27116149	HIST1H2BK
16916	chr6	27112600	27116149	HIST1H2AH
16916	chr6	27112600	27116149	MIR3143
3066	chr1	153961680	153964599	RAB13
3066	chr1	153961680	153964599	RAB13
3066	chr1	153961680	153964599	RPS27
16369	chr6	2998380	3001599	NQO2
16369	chr6	2998380	3001599	NQO2
16369	chr6	2998380	3001599	NQO2
19009	chr6	170861080	170864829	PSMB1
19009	chr6	170861080	170864829	TBP
19009	chr6	170861080	170864829	TBP
9237	chr3	23985480	23990479	NR1D2
9237	chr3	23985480	23990479	NR1D2
9237	chr3	23985480	23990479	NR1D2
38996	chr16	58662000	58665279	CNOT1
38996	chr16	58662000	58665279	CNOT1
38996	chr16	58662000	58665279	CNOT1
38996	chr16	58662000	58665279	CNOT1
6340	chr2	70519350	70522279	SNRPG
5386	chr2	26567350	26570499	ADGRF3
5386	chr2	26567350	26570499	EPT1
19525	chr7	30322350	30326629	ZNRF2
19525	chr7	30322350	30326629	MIR550A1
2246	chr1	89456680	89460549	CCBL2
2246	chr1	89456680	89460549	CCBL2
2246	chr1	89456680	89460549	RBMXL1
2246	chr1	89456680	89460549	RBMXL1
34867	chr14	64853330	64856329	MTHFD1
31909	chr12	56365950	56369429	RAB5B
31909	chr12	56365950	56369429	RAB5B
31909	chr12	56365950	56369429	RAB5B
4180	chr1	212457050	212460979	LOC101929541
4180	chr1	212457050	212460979	PPP2R5A
4532	chr1	229642780	229645679	NUP133
4532	chr1	229642780	229645679	LOC101927478
5333	chr2	25193130	25197579	DNAJC27
5333	chr2	25193130	25197579	DNAJC27
5333	chr2	25193130	25197579	DNAJC27-AS1
40118	chr17	8050400	8069129	PER1
13482	chr4	159591400	159595129	C4orf46
13482	chr4	159591400	159595129	C4orf46
13482	chr4	159591400	159595129	C4orf46
13482	chr4	159591400	159595129	ETFDH
13482	chr4	159591400	159595129	ETFDH
21060	chr7	139042730	139046549	LUC7L2
21060	chr7	139042730	139046549	LUC7L2
13182	chr4	130013330	130015649	SCLT1
13182	chr4	130013330	130015649	SCLT1
13182	chr4	130013330	130015649	SCLT1
13182	chr4	130013330	130015649	C4orf33
13182	chr4	130013330	130015649	C4orf33
44686	chr19	44257400	44260629	SMG9
13284	chr4	144433530	144436949	SMARCA5
13284	chr4	144433530	144436949	SMARCA5-AS1
38213	chr16	14722550	14728629	PARN
38213	chr16	14722550	14728629	PARN
38213	chr16	14722550	14728629	PARN
38213	chr16	14722550	14728629	BFAR
21533	chr8	10695900	10698679	PINX1
21533	chr8	10695900	10698679	PINX1
21533	chr8	10695900	10698679	LOC101929229
25653	chr10	1092950	1096879	IDI1
3475	chr1	173835250	173839129	GAS5-AS1
3475	chr1	173835250	173839129	GAS5
3475	chr1	173835250	173839129	SNORD81
3475	chr1	173835250	173839129	SNORD47
3475	chr1	173835250	173839129	SNORD80
3475	chr1	173835250	173839129	SNORD79
3475	chr1	173835250	173839129	SNORD78
3475	chr1	173835250	173839129	SNORD44
3475	chr1	173835250	173839129	SNORD77
3475	chr1	173835250	173839129	SNORD76
3475	chr1	173835250	173839129	SNORD75
3475	chr1	173835250	173839129	SNORD74
3475	chr1	173835250	173839129	ZBTB37
3475	chr1	173835250	173839129	ZBTB37
48218	chr22	42083350	42086249	SNU13
48218	chr22	42083350	42086249	SNU13
48218	chr22	42083350	42086249	C22orf46
43878	chr19	11645080	11647999	CNN1
43878	chr19	11645080	11647999	CNN1
43878	chr19	11645080	11647999	CNN1
2866	chr1	145825680	145827829	GPR89A
2866	chr1	145825680	145827829	GPR89A
2866	chr1	145825680	145827829	GPR89A
2866	chr1	145825680	145827829	NBPF25P
1176	chr1	32109100	32112049	PEF1
1176	chr1	32109100	32112049	PEF1
1176	chr1	32109100	32112049	PEF1
31651	chr12	48590680	48593849	OR10AD1
9563	chr3	42844350	42847829	HIGD1A
9563	chr3	42844350	42847829	HIGD1A
9563	chr3	42844350	42847829	HIGD1A
9563	chr3	42844350	42847829	ACKR2
19799	chr7	45149880	45152899	TBRG4
19799	chr7	45149880	45152899	TBRG4
19799	chr7	45149880	45152899	TBRG4
19799	chr7	45149880	45152899	TBRG4
30046	chr11	78284580	78287379	NARS2
30046	chr11	78284580	78287379	NARS2
30714	chr11	126137380	126140399	SRPR
30714	chr11	126137380	126140399	SRPR
30714	chr11	126137380	126140399	FOXRED1
30714	chr11	126137380	126140399	FOXRED1
30714	chr11	126137380	126140399	FOXRED1
13513	chr4	164086400	164089399	NAF1
13513	chr4	164086400	164089399	NAF1
29826	chr11	71821280	71825249	ANAPC15
29826	chr11	71821280	71825249	ANAPC15
29826	chr11	71821280	71825249	ANAPC15
29826	chr11	71821280	71825249	ANAPC15
29826	chr11	71821280	71825249	ANAPC15
29826	chr11	71821280	71825249	ANAPC15
29826	chr11	71821280	71825249	ANAPC15
29826	chr11	71821280	71825249	ANAPC15
29826	chr11	71821280	71825249	ANAPC15
29826	chr11	71821280	71825249	ANAPC15
29826	chr11	71821280	71825249	ANAPC15
16883	chr6	26183230	26185249	HIST1H2BE
2542	chr1	110879550	110885679	LOC440600
2542	chr1	110879550	110885679	RBM15
2542	chr1	110879550	110885679	RBM15
8299	chr2	220141750	220146799	DNAJB2
8299	chr2	220141750	220146799	DNAJB2
7959	chr2	198362550	198366549	HSPD1
7959	chr2	198362550	198366549	HSPD1
7959	chr2	198362550	198366549	HSPE1
7959	chr2	198362550	198366549	HSPE1-MOB4
15093	chr5	132200730	132204929	GDF9
15093	chr5	132200730	132204929	GDF9
15093	chr5	132200730	132204929	GDF9
15093	chr5	132200730	132204929	GDF9
15093	chr5	132200730	132204929	GDF9
15093	chr5	132200730	132204929	GDF9
15093	chr5	132200730	132204929	UQCRQ
19793	chr7	44885030	44889349	H2AFV
19793	chr7	44885030	44889349	H2AFV
19793	chr7	44885030	44889349	H2AFV
19793	chr7	44885030	44889349	H2AFV
19793	chr7	44885030	44889349	H2AFV
22014	chr8	29937550	29941449	SARAF
22014	chr8	29937550	29941449	SARAF
6142	chr2	61762650	61767349	XPO1
14763	chr5	89823980	89826979	LYSMD3
14763	chr5	89823980	89826979	LYSMD3
34801	chr14	60713100	60716629	PPM1A
34801	chr14	60713100	60716629	PPM1A
34801	chr14	60713100	60716629	PPM1A
23839	chr9	35602700	35605979	TESK1
23839	chr9	35602700	35605979	MIR4667
34198	chr13	111362900	111369549	ING1
34198	chr13	111362900	111369549	ING1
34198	chr13	111362900	111369549	ING1
34198	chr13	111362900	111369549	ING1
34198	chr13	111362900	111369549	ING1
48211	chr22	42015530	42018749	DESI1
48211	chr22	42015530	42018749	XRCC6
48211	chr22	42015530	42018749	XRCC6
48211	chr22	42015530	42018749	XRCC6
48211	chr22	42015530	42018749	XRCC6
20197	chr7	74265100	74269199	GTF2IRD2
20197	chr7	74265100	74269199	GTF2IRD2
20349	chr7	87504230	87507279	SLC25A40
20349	chr7	87504230	87507279	DBF4
29545	chr11	64888250	64891149	ZNHIT2
29545	chr11	64888250	64891149	FAU
29545	chr11	64888250	64891149	MRPL49
29545	chr11	64888250	64891149	MRPL49
29545	chr11	64888250	64891149	MRPL49
7990	chr2	201751650	201755879	PPIL3
7990	chr2	201751650	201755879	PPIL3
7990	chr2	201751650	201755879	NIF3L1
7990	chr2	201751650	201755879	NIF3L1
7990	chr2	201751650	201755879	NIF3L1
7990	chr2	201751650	201755879	NIF3L1
41536	chr17	61848700	61853079	CCDC47
41536	chr17	61848700	61853079	DDX42
41536	chr17	61848700	61853079	DDX42
16414	chr6	4017500	4019979	PRPF4B
7987	chr2	201726250	201731479	CLK1
7987	chr2	201726250	201731479	CLK1
7987	chr2	201726250	201731479	CLK1
7987	chr2	201726250	201731479	CLK1
44012	chr19	14626200	14630929	DNAJB1
44012	chr19	14626200	14630929	DNAJB1
30272	chr11	108091950	108095249	NPAT
30272	chr11	108091950	108095249	ATM
29436	chr11	62571400	62575049	NXF1
29436	chr11	62571400	62575049	NXF1
14826	chr5	98107800	98111429	RGMB
14826	chr5	98107800	98111429	RGMB-AS1
24542	chr9	102579880	102587779	LOC101928438
24542	chr9	102579880	102587779	NR4A3
24542	chr9	102579880	102587779	NR4A3
24542	chr9	102579880	102587779	NR4A3
17197	chr6	34723450	34730929	SNRPC
17197	chr6	34723450	34730929	SNRPC
22688	chr8	97246400	97249349	UQCRB
22688	chr8	97246400	97249349	UQCRB
22688	chr8	97246400	97249349	UQCRB
22688	chr8	97246400	97249349	UQCRB
40783	chr17	36979950	36983379	CWC25
40783	chr17	36979950	36983379	CWC25
40783	chr17	36979950	36983379	MIR4727
14751	chr5	87563250	87566199	TMEM161B
14751	chr5	87563250	87566199	TMEM161B
14751	chr5	87563250	87566199	TMEM161B
14751	chr5	87563250	87566199	TMEM161B
14751	chr5	87563250	87566199	TMEM161B-AS1
14751	chr5	87563250	87566199	TMEM161B-AS1
14751	chr5	87563250	87566199	TMEM161B-AS1
14751	chr5	87563250	87566199	TMEM161B-AS1
40489	chr17	21029330	21031649	DHRS7B
40725	chr17	33913380	33915779	AP2B1
40725	chr17	33913380	33915779	AP2B1
5846	chr2	43821600	43824649	THADA
5846	chr2	43821600	43824649	THADA
5846	chr2	43821600	43824649	THADA
5846	chr2	43821600	43824649	THADA
5846	chr2	43821600	43824649	THADA
45742	chr20	24971980	24974779	APMAP
20684	chr7	107530530	107533249	DLD
20684	chr7	107530530	107533249	DLD
20684	chr7	107530530	107533249	DLD
20684	chr7	107530530	107533249	DLD
4723	chr1	236225430	236233199	NID1
46146	chr20	43984050	43993579	SYS1
46146	chr20	43984050	43993579	SYS1
46146	chr20	43984050	43993579	SYS1
46146	chr20	43984050	43993579	SYS1-DBNDD2
11579	chr3	184999650	185002079	MAP3K13
11579	chr3	184999650	185002079	MAP3K13
11579	chr3	184999650	185002079	MAP3K13
34457	chr14	24910400	24912829	SDR39U1
34457	chr14	24910400	24912829	SDR39U1
34457	chr14	24910400	24912829	SDR39U1
34457	chr14	24910400	24912829	SDR39U1
34457	chr14	24910400	24912829	LOC101927045
22681	chr8	96280150	96283399	C8orf37
22681	chr8	96280150	96283399	C8orf37-AS1
22681	chr8	96280150	96283399	C8orf37-AS1
22681	chr8	96280150	96283399	C8orf37-AS1
22681	chr8	96280150	96283399	C8orf37-AS1
22681	chr8	96280150	96283399	C8orf37-AS1
22681	chr8	96280150	96283399	C8orf37-AS1
22681	chr8	96280150	96283399	C8orf37-AS1
22681	chr8	96280150	96283399	C8orf37-AS1
22681	chr8	96280150	96283399	C8orf37-AS1
24240	chr9	91923600	91926829	CKS2
24240	chr9	91923600	91926829	MIR3153
33387	chr13	31190350	31193429	USPL1
29499	chr11	64070830	64075329	ESRRA
29499	chr11	64070830	64075329	ESRRA
29499	chr11	64070830	64075329	ESRRA
33685	chr13	45913800	45917079	TPT1
33685	chr13	45913800	45917079	TPT1
33685	chr13	45913800	45917079	TPT1
33685	chr13	45913800	45917079	SNORA31
33685	chr13	45913800	45917079	TPT1-AS1
6424	chr2	74153100	74155279	DGUOK
6424	chr2	74153100	74155279	DGUOK
20463	chr7	99096080	99099349	ZNF394
20463	chr7	99096080	99099349	ZKSCAN5
20463	chr7	99096080	99099349	ZKSCAN5
11103	chr3	141593750	141597379	ATP1B3
33403	chr13	31734350	31737649	HSPH1
33403	chr13	31734350	31737649	HSPH1
33403	chr13	31734350	31737649	HSPH1
33403	chr13	31734350	31737649	HSPH1
20711	chr7	112089130	112095449	IFRD1
20711	chr7	112089130	112095449	IFRD1
20711	chr7	112089130	112095449	IFRD1
3262	chr1	161283050	161285549	MPZ
3262	chr1	161283050	161285549	SDHC
3262	chr1	161283050	161285549	SDHC
3262	chr1	161283050	161285549	SDHC
3262	chr1	161283050	161285549	SDHC
3262	chr1	161283050	161285549	SDHC
3262	chr1	161283050	161285549	SDHC
32173	chr12	82751050	82753629	CCDC59
32173	chr12	82751050	82753629	CCDC59
32173	chr12	82751050	82753629	METTL25
16886	chr6	26203550	26207849	HIST1H4E
48171	chr22	41251300	41254379	ST13
48171	chr22	41251300	41254379	ST13
48171	chr22	41251300	41254379	XPNPEP3
48171	chr22	41251300	41254379	XPNPEP3
19423	chr7	23569900	23573029	TRA2A
19423	chr7	23569900	23573029	TRA2A
19423	chr7	23569900	23573029	TRA2A
19423	chr7	23569900	23573029	TRA2A
7266	chr2	128282700	128285649	IWS1
24298	chr9	94876350	94879299	SPTLC1
24298	chr9	94876350	94879299	SPTLC1
24298	chr9	94876350	94879299	SPTLC1
23735	chr9	32549550	32553699	TOPORS
23735	chr9	32549550	32553699	TOPORS
23735	chr9	32549550	32553699	TOPORS-AS1
23735	chr9	32549550	32553699	TOPORS-AS1
23735	chr9	32549550	32553699	TOPORS-AS1
23735	chr9	32549550	32553699	TOPORS-AS1
11486	chr3	179321450	179323949	MRPL47
11486	chr3	179321450	179323949	MRPL47
11486	chr3	179321450	179323949	NDUFB5
11486	chr3	179321450	179323949	NDUFB5
11486	chr3	179321450	179323949	NDUFB5
32294	chr12	94852200	94855049	CEP83
32294	chr12	94852200	94855049	CEP83
32294	chr12	94852200	94855049	CEP83-AS1
18747	chr6	160181530	160184899	LOC100129518
18747	chr6	160181530	160184899	ACAT2
18747	chr6	160181530	160184899	ACAT2
32134	chr12	72147330	72153429	RAB21
23881	chr9	37463680	37467579	ZBTB5
20368	chr7	91762250	91765449	CYP51A1
20368	chr7	91762250	91765449	CYP51A1
20368	chr7	91762250	91765449	CYP51A1-AS1
20368	chr7	91762250	91765449	CYP51A1-AS1
16887	chr6	26214680	26219329	HIST1H2BG
16887	chr6	26214680	26219329	HIST1H2AE
16985	chr6	30027630	30030599	ZNRD1-AS1
16985	chr6	30027630	30030599	ZNRD1
16985	chr6	30027630	30030599	ZNRD1
16985	chr6	30027630	30030599	ZNRD1
16985	chr6	30027630	30030599	ZNRD1
16985	chr6	30027630	30030599	ZNRD1
39317	chr16	77223180	77225949	MON1B
39317	chr16	77223180	77225949	MON1B
39317	chr16	77223180	77225949	MON1B
2763	chr1	119681680	119684879	WARS2
2763	chr1	119681680	119684879	WARS2
2763	chr1	119681680	119684879	LOC101929147
2763	chr1	119681680	119684879	LOC101929147
2763	chr1	119681680	119684879	LOC101929147
2763	chr1	119681680	119684879	LOC101929147
7812	chr2	179341950	179346779	FKBP7
7812	chr2	179341950	179346779	FKBP7
7812	chr2	179341950	179346779	PLEKHA3
16893	chr6	26283800	26287149	HIST1H4H
24973	chr9	127701850	127705379	GOLGA1
12674	chr4	76648350	76652529	USO1
12674	chr4	76648350	76652529	USO1
10600	chr3	122100780	122104399	CCDC58
10600	chr3	122100780	122104399	CCDC58
10600	chr3	122100780	122104399	FAM162A
31657	chr12	49109100	49112129	CCNT1
31657	chr12	49109100	49112129	CCNT1
2849	chr1	145469150	145478549	POLR3GL
2849	chr1	145469150	145478549	ANKRD34A
2849	chr1	145469150	145478549	LIX1L
21059	chr7	139023800	139028249	LUC7L2
21059	chr7	139023800	139028249	C7orf55
21059	chr7	139023800	139028249	C7orf55
21059	chr7	139023800	139028249	C7orf55
21059	chr7	139023800	139028249	C7orf55
21059	chr7	139023800	139028249	C7orf55-LUC7L2
9451	chr3	38204680	38208849	OXSR1
37767	chr16	283250	286579	ITFG3
37767	chr16	283250	286579	ITFG3
37767	chr16	283250	286579	ITFG3
2157	chr1	78443200	78446679	FUBP1
2157	chr1	78443200	78446679	FUBP1
2157	chr1	78443200	78446679	FUBP1
23811	chr9	34663880	34667929	CCL27
38302	chr16	18811400	18814499	ARL6IP1
16853	chr6	24718750	24723749	C6orf62
30274	chr11	108336300	108339849	C11orf65
24384	chr9	97487650	97490279	C9orf3
24384	chr9	97487650	97490279	C9orf3
2971	chr1	150600900	150604349	ENSA
2971	chr1	150600900	150604349	ENSA
2971	chr1	150600900	150604349	ENSA
2971	chr1	150600900	150604349	ENSA
2971	chr1	150600900	150604349	ENSA
2971	chr1	150600900	150604349	ENSA
2971	chr1	150600900	150604349	ENSA
2971	chr1	150600900	150604349	ENSA
37117	chr15	78439030	78443549	IDH3A
11863	chr3	196224750	196232399	RNF168
32414	chr12	104678830	104684479	TXNRD1
32414	chr12	104678830	104684479	TXNRD1
32414	chr12	104678830	104684479	TXNRD1
32414	chr12	104678830	104684479	TXNRD1
32414	chr12	104678830	104684479	TXNRD1
32414	chr12	104678830	104684479	TXNRD1
43243	chr18	71813680	71817149	FBXO15
43243	chr18	71813680	71817149	FBXO15
43243	chr18	71813680	71817149	TIMM21
47245	chr22	18109550	18112929	ATP6V1E1
47245	chr22	18109550	18112929	ATP6V1E1
47245	chr22	18109550	18112929	ATP6V1E1
20478	chr7	99646050	99649129	ZSCAN21
406	chr1	10268980	10272949	KIF1B
406	chr1	10268980	10272949	KIF1B
16951	chr6	28302000	28304979	ZSCAN31
16951	chr6	28302000	28304979	ZSCAN31
16951	chr6	28302000	28304979	ZSCAN31
16951	chr6	28302000	28304979	ZSCAN31
16951	chr6	28302000	28304979	ZSCAN31
16951	chr6	28302000	28304979	ZSCAN31
7865	chr2	187349580	187352379	ZC3H15
28820	chr11	18654450	18657229	SPTY2D1
24241	chr9	91932050	91935629	SECISBP2
24241	chr9	91932050	91935629	SECISBP2
24241	chr9	91932050	91935629	SECISBP2
24241	chr9	91932050	91935629	SECISBP2
31489	chr12	31475780	31480649	FAM60A
31489	chr12	31475780	31480649	FAM60A
31489	chr12	31475780	31480649	FAM60A
31489	chr12	31475780	31480649	FLJ13224
34410	chr14	23788880	23792249	PABPN1
17879	chr6	90527450	90530949	MDN1
43573	chr19	4341200	4344379	STAP2
43573	chr19	4341200	4344379	STAP2
43573	chr19	4341200	4344379	MPND
43573	chr19	4341200	4344379	MPND
43573	chr19	4341200	4344379	MPND
31224	chr12	10764950	10767379	MAGOHB
31224	chr12	10764950	10767379	MAGOHB
9382	chr3	37033130	37037979	EPM2AIP1
9382	chr3	37033130	37037979	MLH1
9382	chr3	37033130	37037979	MLH1
9382	chr3	37033130	37037979	MLH1
9382	chr3	37033130	37037979	MLH1
9382	chr3	37033130	37037979	MLH1
9382	chr3	37033130	37037979	MLH1
9382	chr3	37033130	37037979	MLH1
19811	chr7	45806800	45810099	SEPT7P2
15132	chr5	133705100	133708699	CDKL3
15132	chr5	133705100	133708699	CDKL3
15132	chr5	133705100	133708699	CDKL3
15132	chr5	133705100	133708699	UBE2B
14810	chr5	96034530	96040029	CAST
14810	chr5	96034530	96040029	CAST
14810	chr5	96034530	96040029	CAST
18748	chr6	160208750	160213149	TCP1
18748	chr6	160208750	160213149	TCP1
18748	chr6	160208750	160213149	SNORA29
18748	chr6	160208750	160213149	MRPL18
12765	chr4	83810180	83813699	SEC31A
12765	chr4	83810180	83813699	SEC31A
12765	chr4	83810180	83813699	SEC31A
12765	chr4	83810180	83813699	SEC31A
12765	chr4	83810180	83813699	SEC31A
12765	chr4	83810180	83813699	SEC31A
12765	chr4	83810180	83813699	SEC31A
12765	chr4	83810180	83813699	SEC31A
9370	chr3	33757980	33761349	CLASP2
44989	chr19	49953650	49958049	PIH1D1
44989	chr19	49953650	49958049	ALDH16A1
44989	chr19	49953650	49958049	ALDH16A1
40684	chr17	30675680	30678599	MIR632
40684	chr17	30675680	30678599	ZNF207
40684	chr17	30675680	30678599	ZNF207
40684	chr17	30675680	30678599	ZNF207
9881	chr3	52310700	52314299	WDR82
10606	chr3	122511400	122515529	HSPBAP1
10606	chr3	122511400	122515529	DIRC2
27695	chr10	105725330	105729979	SLK
27695	chr10	105725330	105729979	SLK
12648	chr4	73934000	73936849	COX18
12648	chr4	73934000	73936849	COX18
12648	chr4	73934000	73936849	COX18
12648	chr4	73934000	73936849	COX18
44931	chr19	49120780	49124249	RPL18
44931	chr19	49120780	49124249	RPL18
44931	chr19	49120780	49124249	RPL18
44931	chr19	49120780	49124249	SPHK2
44931	chr19	49120780	49124249	SPHK2
44931	chr19	49120780	49124249	SPHK2
44931	chr19	49120780	49124249	SPHK2
8	chr1	712650	715999	LOC100288069
16961	chr6	28862150	28865849	HCG14
43496	chr19	2943280	2946549	ZNF77
29519	chr11	64544130	64548299	SF1
29519	chr11	64544130	64548299	SF1
29519	chr11	64544130	64548299	SF1
29519	chr11	64544130	64548299	SF1
29519	chr11	64544130	64548299	SF1
29519	chr11	64544130	64548299	SF1
29519	chr11	64544130	64548299	SF1
29519	chr11	64544130	64548299	SF1
2927	chr1	149782680	149786149	HIST2H2BF
2927	chr1	149782680	149786149	HIST2H2BF
2927	chr1	149782680	149786149	HIST2H3D
2498	chr1	110089730	110092549	GNAI3
2466	chr1	109504400	109507199	CLCC1
2466	chr1	109504400	109507199	CLCC1
34331	chr14	20799930	20802379	CCNB1IP1
34331	chr14	20799930	20802379	CCNB1IP1
34331	chr14	20799930	20802379	CCNB1IP1
38591	chr16	30387500	30391949	MYLPF
38591	chr16	30387500	30391949	SEPT1
38591	chr16	30387500	30391949	ZNF48
38591	chr16	30387500	30391949	ZNF48
41844	chr17	73661950	73664749	RECQL5
41844	chr17	73661950	73664749	RECQL5
41844	chr17	73661950	73664749	RECQL5
41844	chr17	73661950	73664749	SAP30BP
41844	chr17	73661950	73664749	SAP30BP
41844	chr17	73661950	73664749	SAP30BP
41844	chr17	73661950	73664749	SAP30BP
41844	chr17	73661950	73664749	SAP30BP
10406	chr3	101393730	101396729	ZBTB11
10406	chr3	101393730	101396729	ZBTB11-AS1
22853	chr8	103874050	103877999	AZIN1
22853	chr8	103874050	103877999	AZIN1
22853	chr8	103874050	103877999	AZIN1
22853	chr8	103874050	103877999	AZIN1-AS1
22853	chr8	103874050	103877999	AZIN1-AS1
46803	chr21	35286780	35289599	ATP5O
12767	chr4	83930650	83935449	LIN54
12767	chr4	83930650	83935449	LIN54
12767	chr4	83930650	83935449	LIN54
12767	chr4	83930650	83935449	LIN54
12767	chr4	83930650	83935449	LIN54
12767	chr4	83930650	83935449	LIN54
12767	chr4	83930650	83935449	LIN54
20663	chr7	105923580	105927149	NAMPT
41456	chr17	57783400	57786449	PTRH2
41456	chr17	57783400	57786449	PTRH2
41456	chr17	57783400	57786449	VMP1
30069	chr11	82865830	82870049	PCF11
21268	chr7	151213430	151219099	RHEB
11231	chr3	155570700	155574199	SLC33A1
11231	chr3	155570700	155574199	SLC33A1
23995	chr9	69261250	69263899	CBWD6
23995	chr9	69261250	69263899	CBWD5
16921	chr6	27439300	27442449	ZNF184
37845	chr16	1754130	1759879	MAPK8IP3
37845	chr16	1754130	1759879	MAPK8IP3
18412	chr6	143379450	143383449	AIG1
18412	chr6	143379450	143383449	AIG1
18412	chr6	143379450	143383449	AIG1
18412	chr6	143379450	143383449	AIG1
3174	chr1	156181900	156184599	PMF1
3174	chr1	156181900	156184599	PMF1
3174	chr1	156181900	156184599	PMF1
3174	chr1	156181900	156184599	PMF1-BGLAP
3174	chr1	156181900	156184599	PMF1-BGLAP
3174	chr1	156181900	156184599	PMF1-BGLAP
3174	chr1	156181900	156184599	PMF1-BGLAP
35133	chr14	74483780	74487449	ENTPD5
35133	chr14	74483780	74487449	CCDC176
9095	chr3	14689500	14694649	CCDC174
14598	chr5	72859930	72862829	ANKRA2
14598	chr5	72859930	72862829	UTP15
14598	chr5	72859930	72862829	UTP15
14598	chr5	72859930	72862829	UTP15
43877	chr19	11638580	11641729	ECSIT
43877	chr19	11638580	11641729	ECSIT
43877	chr19	11638580	11641729	ECSIT
43877	chr19	11638580	11641729	ECSIT
45035	chr19	50876830	50881049	NR1H2
45035	chr19	50876830	50881049	NR1H2
24918	chr9	125024030	125028299	RBM18
24918	chr9	125024030	125028299	RBM18
24918	chr9	125024030	125028299	RBM18
24918	chr9	125024030	125028299	MRRF
24918	chr9	125024030	125028299	MRRF
17272	chr6	36560300	36564849	SRSF3
17272	chr6	36560300	36564849	SRSF3
14281	chr5	43119600	43123129	ZNF131
14281	chr5	43119600	43123129	ZNF131
14281	chr5	43119600	43123129	ZNF131
14281	chr5	43119600	43123129	ZNF131
22887	chr8	109454280	109457199	EMC2
23730	chr9	27569630	27575299	C9orf72
23730	chr9	27569630	27575299	C9orf72
23730	chr9	27569630	27575299	C9orf72
29146	chr11	45867000	45872699	CRY2
29146	chr11	45867000	45872699	CRY2
17069	chr6	31829130	31833149	NEU1
39597	chr16	87413050	87422579	FBXO31
24381	chr9	97135330	97138629	HIATL1
45169	chr19	55917400	55921229	UBE2S
13689	chr4	185392900	185398449	IRF2
27700	chr10	105879880	105883199	SFR1
27700	chr10	105879880	105883199	SFR1
11135	chr3	145877400	145880699	PLOD2
11135	chr3	145877400	145880699	PLOD2
44465	chr19	36703830	36707379	ZNF565
44465	chr19	36703830	36707379	ZNF565
44465	chr19	36703830	36707379	ZNF146
44465	chr19	36703830	36707379	ZNF146
44465	chr19	36703830	36707379	ZNF146
5865	chr2	45837100	45839249	SRBD1
36919	chr15	72763930	72768749	ARIH1
44601	chr19	41281850	41285749	MIA
44601	chr19	41281850	41285749	MIA
44601	chr19	41281850	41285749	MIA-RAB4B
44601	chr19	41281850	41285749	RAB4B
44601	chr19	41281850	41285749	RAB4B-EGLN2
16879	chr6	26103300	26105499	HIST1H4C
16879	chr6	26103300	26105499	HIST1H1T
19995	chr7	56172880	56175599	CHCHD2
17861	chr6	89787730	89793799	PNRC1
34927	chr14	68085230	68088199	ARG2
39301	chr16	75465880	75469299	CFDP1
11918	chr4	328880	333479	ZNF141
18299	chr6	136609250	136612699	BCLAF1
18299	chr6	136609250	136612699	BCLAF1
18299	chr6	136609250	136612699	BCLAF1
18299	chr6	136609250	136612699	BCLAF1
29307	chr11	59434980	59438179	PATL1
2462	chr1	109288100	109290979	STXBP3
35131	chr14	74352100	74355029	ZNF410
35131	chr14	74352100	74355029	ZNF410
35131	chr14	74352100	74355029	ZNF410
35131	chr14	74352100	74355029	ZNF410
35131	chr14	74352100	74355029	ZNF410
35131	chr14	74352100	74355029	ZNF410
5119	chr2	10829030	10831499	NOL10
5119	chr2	10829030	10831499	NOL10
5119	chr2	10829030	10831499	NOL10
5119	chr2	10829030	10831499	NOL10
32371	chr12	98986730	98989029	SLC25A3
32371	chr12	98986730	98989029	SLC25A3
32371	chr12	98986730	98989029	SLC25A3
9500	chr3	40493280	40496229	ENTPD3-AS1
9500	chr3	40493280	40496229	RPL14
9500	chr3	40493280	40496229	RPL14
765	chr1	20833330	20835699	MUL1
48222	chr22	42227380	42231149	SREBF2
48222	chr22	42227380	42231149	SREBF2
17074	chr6	31938280	31941679	DXO
17074	chr6	31938280	31941679	STK19
17074	chr6	31938280	31941679	STK19
17074	chr6	31938280	31941679	STK19
8088	chr2	207022650	207025999	NDUFS1
8088	chr2	207022650	207025999	NDUFS1
8088	chr2	207022650	207025999	NDUFS1
8088	chr2	207022650	207025999	NDUFS1
8088	chr2	207022650	207025999	NDUFS1
8088	chr2	207022650	207025999	EEF1B2
8088	chr2	207022650	207025999	EEF1B2
8088	chr2	207022650	207025999	EEF1B2
8088	chr2	207022650	207025999	SNORD51
8088	chr2	207022650	207025999	SNORA41
37478	chr15	91536650	91539299	PRC1
37478	chr15	91536650	91539299	PRC1
37478	chr15	91536650	91539299	PRC1
23736	chr9	32571880	32574149	NDUFB6
23736	chr9	32571880	32574149	NDUFB6
23736	chr9	32571880	32574149	NDUFB6
15547	chr5	148204680	148207999	ADRB2
10403	chr3	101279430	101281899	TRMT10C
7875	chr2	190304530	190307499	WDR75
7875	chr2	190304530	190307499	WDR75
28815	chr11	18414530	18419149	LDHA
28815	chr11	18414530	18419149	LDHA
28815	chr11	18414530	18419149	LDHA
28815	chr11	18414530	18419149	LDHA
28815	chr11	18414530	18419149	LDHA
28815	chr11	18414530	18419149	LDHA
8036	chr2	203128500	203132029	NOP58
5430	chr2	27543430	27547899	MPV17
29228	chr11	47662750	47665749	MTCH2
39905	chr17	2292650	2306929	MNT
48194	chr22	41774930	41780199	TEF
20056	chr7	66307900	66311899	GTF2IRD1P1
37553	chr15	93446200	93448849	CHD2
37553	chr15	93446200	93448849	CHD2
37553	chr15	93446200	93448849	MIR3175
4707	chr1	235290350	235293679	TOMM20
4707	chr1	235290350	235293679	SNORA14B
17477	chr6	43137200	43143399	SRF
17477	chr6	43137200	43143399	SRF
15050	chr5	130969530	130972649	RAPGEF6
15050	chr5	130969530	130972649	RAPGEF6
15050	chr5	130969530	130972649	RAPGEF6
15050	chr5	130969530	130972649	RAPGEF6
15050	chr5	130969530	130972649	RAPGEF6
15050	chr5	130969530	130972649	RAPGEF6
12720	chr4	78738380	78742779	CNOT6L
12720	chr4	78738380	78742779	CNOT6L
11734	chr3	193310130	193312529	OPA1
11734	chr3	193310130	193312529	OPA1
11734	chr3	193310130	193312529	OPA1
11734	chr3	193310130	193312529	OPA1
11734	chr3	193310130	193312529	OPA1
11734	chr3	193310130	193312529	OPA1
11734	chr3	193310130	193312529	OPA1
11734	chr3	193310130	193312529	OPA1
44494	chr19	37824050	37827029	HKR1
44683	chr19	44171130	44175399	PLAUR
44683	chr19	44171130	44175399	PLAUR
44683	chr19	44171130	44175399	PLAUR
44683	chr19	44171130	44175399	PLAUR
45444	chr20	5099250	5102049	PCNA
45444	chr20	5099250	5102049	PCNA-AS1
26386	chr10	38145100	38148199	ZNF248
26386	chr10	38145100	38148199	ZNF248
26386	chr10	38145100	38148199	ZNF248
26386	chr10	38145100	38148199	ZNF248
26386	chr10	38145100	38148199	ZNF248
2995	chr1	151370830	151373529	PSMB4
5650	chr2	37457800	37460799	CEBPZ
5650	chr2	37457800	37460799	NDUFAF7
5650	chr2	37457800	37460799	NDUFAF7
14865	chr5	108744030	108747549	PJA2
34394	chr14	23475100	23477549	C14orf93
34394	chr14	23475100	23477549	C14orf93
34394	chr14	23475100	23477549	C14orf93
34394	chr14	23475100	23477549	C14orf93
34394	chr14	23475100	23477549	C14orf93
4193	chr1	212779250	212784179	ATF3
4193	chr1	212779250	212784179	ATF3
4193	chr1	212779250	212784179	ATF3
4193	chr1	212779250	212784179	ATF3
4472	chr1	228295550	228298849	MRPL55
4472	chr1	228295550	228298849	MRPL55
4472	chr1	228295550	228298849	MRPL55
4472	chr1	228295550	228298849	MRPL55
4472	chr1	228295550	228298849	MRPL55
4472	chr1	228295550	228298849	MRPL55
4472	chr1	228295550	228298849	MRPL55
4472	chr1	228295550	228298849	MRPL55
2041	chr1	65466200	65469599	LINC01359
44918	chr19	48865700	48868249	TMEM143
44918	chr19	48865700	48868249	TMEM143
44918	chr19	48865700	48868249	TMEM143
44918	chr19	48865700	48868249	TMEM143
44918	chr19	48865700	48868249	TMEM143
44918	chr19	48865700	48868249	SYNGR4
9986	chr3	57580430	57585349	ARF4
17831	chr6	86302100	86305179	SNX14
17831	chr6	86302100	86305179	SNX14
17831	chr6	86302100	86305179	SNX14
17831	chr6	86302100	86305179	SNX14
33835	chr13	53028330	53030799	VPS36
33835	chr13	53028330	53030799	VPS36
33835	chr13	53028330	53030799	CKAP2
33835	chr13	53028330	53030799	CKAP2
33835	chr13	53028330	53030799	CKAP2
33835	chr13	53028330	53030799	CKAP2
48173	chr22	41345550	41349179	RBX1
16880	chr6	26122030	26127399	HIST1H2BC
16880	chr6	26122030	26127399	HIST1H2AC
26943	chr10	74926550	74929499	ECD
26943	chr10	74926550	74929499	ECD
26943	chr10	74926550	74929499	ECD
26943	chr10	74926550	74929499	ECD
26943	chr10	74926550	74929499	FAM149B1
18746	chr6	160146850	160150049	WTAP
18746	chr6	160146850	160150049	WTAP
18746	chr6	160146850	160150049	WTAP
18746	chr6	160146850	160150049	WTAP
18746	chr6	160146850	160150049	WTAP
18746	chr6	160146850	160150049	WTAP
4318	chr1	222816350	222818949	MIA3
29550	chr11	65027730	65030849	POLA2
6299	chr2	69662000	69666279	NFU1
6299	chr2	69662000	69666279	NFU1
6299	chr2	69662000	69666279	NFU1
6299	chr2	69662000	69666279	NFU1
6299	chr2	69662000	69666279	NFU1
39355	chr16	81036850	81042429	CMC2
39355	chr16	81036850	81042429	CENPN
39355	chr16	81036850	81042429	CENPN
39355	chr16	81036850	81042429	CENPN
39355	chr16	81036850	81042429	CENPN
39355	chr16	81036850	81042429	CENPN
41870	chr17	73973730	73977179	ACOX1
41870	chr17	73973730	73977179	ACOX1
41870	chr17	73973730	73977179	ACOX1
41870	chr17	73973730	73977179	TEN1
41870	chr17	73973730	73977179	TEN1-CDK3
12669	chr4	76438280	76441249	RCHY1
12669	chr4	76438280	76441249	RCHY1
12669	chr4	76438280	76441249	RCHY1
12669	chr4	76438280	76441249	RCHY1
12669	chr4	76438280	76441249	RCHY1
12669	chr4	76438280	76441249	RCHY1
12669	chr4	76438280	76441249	RCHY1
12669	chr4	76438280	76441249	RCHY1
12669	chr4	76438280	76441249	RCHY1
12669	chr4	76438280	76441249	RCHY1
12669	chr4	76438280	76441249	THAP6
30261	chr11	105891630	105894529	MSANTD4
26026	chr10	18939300	18941879	NSUN6
18500	chr6	149865850	149868379	PPIL4
22107	chr8	38242030	38245499	WHSC1L1
22107	chr8	38242030	38245499	WHSC1L1
22107	chr8	38242030	38245499	LETM2
22107	chr8	38242030	38245499	LETM2
22107	chr8	38242030	38245499	LETM2
22107	chr8	38242030	38245499	LETM2
22107	chr8	38242030	38245499	LETM2
22107	chr8	38242030	38245499	LETM2
43487	chr19	2718100	2724849	DIRAS1
45457	chr20	5589880	5593149	GPCPD1
20775	chr7	120590000	120592479	ING3
20775	chr7	120590000	120592479	ING3
40067	chr17	7209000	7213099	EIF5A
40067	chr17	7209000	7213099	EIF5A
40067	chr17	7209000	7213099	EIF5A
40067	chr17	7209000	7213099	EIF5A
13149	chr4	128702180	128705099	HSPA4L
36273	chr15	45490380	45495349	SHF
30311	chr11	111748450	111751349	FDXACB1
30311	chr11	111748450	111751349	FDXACB1
30311	chr11	111748450	111751349	C11orf1
35645	chr14	102782180	102787779	ZNF839
35645	chr14	102782180	102787779	ZNF839
35645	chr14	102782180	102787779	ZNF839
48258	chr22	43009280	43014499	POLDIP3
48258	chr22	43009280	43014499	POLDIP3
48258	chr22	43009280	43014499	POLDIP3
48258	chr22	43009280	43014499	POLDIP3
48258	chr22	43009280	43014499	RNU12
42501	chr18	12944480	12949399	SEH1L
42501	chr18	12944480	12949399	SEH1L
27187	chr10	86086600	86090279	CCSER2
27187	chr10	86086600	86090279	CCSER2
27187	chr10	86086600	86090279	CCSER2
15047	chr5	130505680	130508179	LYRM7
15047	chr5	130505680	130508179	LYRM7
15047	chr5	130505680	130508179	LYRM7
47698	chr22	29193600	29198279	XBP1
47698	chr22	29193600	29198279	XBP1
4710	chr1	235489330	235493599	ARID4B
4710	chr1	235489330	235493599	ARID4B
4710	chr1	235489330	235493599	ARID4B
4710	chr1	235489330	235493599	GGPS1
4710	chr1	235489330	235493599	GGPS1
9793	chr3	49822300	49825579	IP6K1
9793	chr3	49822300	49825579	IP6K1
9793	chr3	49822300	49825579	IP6K1
37886	chr16	2580700	2584049	CEMP1
37886	chr16	2580700	2584049	MIR3178
11528	chr3	183351950	183359499	KLHL24
31306	chr12	14925730	14928979	HIST4H4
31306	chr12	14925730	14928979	H2AFJ
31306	chr12	14925730	14928979	H2AFJ
365	chr1	9487730	9490529	LOC100506022
365	chr1	9487730	9490529	LOC100506022
44877	chr19	47758430	47762579	CCDC9
12671	chr4	76596830	76600099	G3BP2
12671	chr4	76596830	76600099	G3BP2
12671	chr4	76596830	76600099	G3BP2
17346	chr6	38606150	38609499	BTBD9
17346	chr6	38606150	38609499	BTBD9
22905	chr8	118531830	118534279	MED30
22905	chr8	118531830	118534279	MED30
13309	chr4	147441950	147444999	SLC10A7
13309	chr4	147441950	147444999	SLC10A7
13309	chr4	147441950	147444999	SLC10A7
9266	chr3	25830380	25832829	NGLY1
9266	chr3	25830380	25832829	OXSM
9266	chr3	25830380	25832829	OXSM
9266	chr3	25830380	25832829	OXSM
18030	chr6	111194400	111198599	AMD1
18030	chr6	111194400	111198599	AMD1
18030	chr6	111194400	111198599	AMD1
18030	chr6	111194400	111198599	AMD1
14939	chr5	114960300	114963249	TMED7-TICAM2
14939	chr5	114960300	114963249	TMED7-TICAM2
14939	chr5	114960300	114963249	TMED7
8054	chr2	203877630	203881429	NBEAL1
2930	chr1	149821150	149825699	HIST2H2BC
2930	chr1	149821150	149825699	HIST2H2AA3
2930	chr1	149821150	149825699	HIST2H2AA4
2930	chr1	149821150	149825699	HIST2H3C
2930	chr1	149821150	149825699	HIST2H3A
22890	chr8	110345000	110347799	NUDCD1
22890	chr8	110345000	110347799	NUDCD1
22890	chr8	110345000	110347799	ENY2
22890	chr8	110345000	110347799	ENY2
22890	chr8	110345000	110347799	ENY2
22890	chr8	110345000	110347799	ENY2
30079	chr11	85357980	85360249	TMEM126A
30079	chr11	85357980	85360249	TMEM126A
24743	chr9	116036400	116039179	CDC26
24743	chr9	116036400	116039179	PRPF4
24743	chr9	116036400	116039179	PRPF4
36152	chr15	41406830	41410229	INO80
36152	chr15	41406830	41410229	INO80
11242	chr3	156541900	156545679	LEKR1
11242	chr3	156541900	156545679	LEKR1
28290	chr11	807980	811749	PIDD1
28290	chr11	807980	811749	PIDD1
28290	chr11	807980	811749	RPLP2
28290	chr11	807980	811749	SNORA52
26392	chr10	38690250	38693479	SEPT7P9
4154	chr1	211555200	211557499	LINC00467
35130	chr14	74317350	74321029	PTGR2
35130	chr14	74317350	74321029	PTGR2
35130	chr14	74317350	74321029	PTGR2
31732	chr12	50502600	50507649	COX14
31732	chr12	50502600	50507649	COX14
31732	chr12	50502600	50507649	COX14
6130	chr2	61107030	61110849	LINC01185
6130	chr2	61107030	61110849	REL
6130	chr2	61107030	61110849	REL
19466	chr7	27778280	27781199	TAX1BP1
19466	chr7	27778280	27781199	TAX1BP1
19466	chr7	27778280	27781199	TAX1BP1
19466	chr7	27778280	27781199	TAX1BP1
2947	chr1	150205850	150209079	ANP32E
2947	chr1	150205850	150209079	ANP32E
2947	chr1	150205850	150209079	ANP32E
2947	chr1	150205850	150209079	ANP32E
2947	chr1	150205850	150209079	ANP32E
1340	chr1	36862050	36864999	LSM10
40272	chr17	15901480	15904749	ZSWIM7
40272	chr17	15901480	15904749	ZSWIM7
40272	chr17	15901480	15904749	TTC19
40272	chr17	15901480	15904749	TTC19
39493	chr16	85043500	85046529	ZDHHC7
39493	chr16	85043500	85046529	ZDHHC7
27017	chr10	76968730	76972129	VDAC2
27017	chr10	76968730	76972129	VDAC2
27017	chr10	76968730	76972129	VDAC2
27017	chr10	76968730	76972129	VDAC2
780	chr1	21111750	21115299	HP1BP3
43770	chr19	9433530	9436229	ZNF559
43770	chr19	9433530	9436229	ZNF559
43770	chr19	9433530	9436229	ZNF559
43770	chr19	9433530	9436229	ZNF559
43770	chr19	9433530	9436229	ZNF559
43770	chr19	9433530	9436229	ZNF559
43770	chr19	9433530	9436229	ZNF559
43770	chr19	9433530	9436229	ZNF559
43770	chr19	9433530	9436229	ZNF559-ZNF177
43770	chr19	9433530	9436229	ZNF559-ZNF177
2783	chr1	120903950	120907399	HIST2H2BA
18731	chr6	159289300	159292299	C6orf99
18731	chr6	159289300	159292299	C6orf99
18731	chr6	159289300	159292299	C6orf99
11012	chr3	136469250	136472979	STAG1
41034	chr17	42400650	42405799	SLC25A39
41034	chr17	42400650	42405799	SLC25A39
23031	chr8	125550050	125552699	TATDN1
23031	chr8	125550050	125552699	TATDN1
23031	chr8	125550050	125552699	TATDN1
23031	chr8	125550050	125552699	NDUFB9
23031	chr8	125550050	125552699	NDUFB9
23031	chr8	125550050	125552699	NDUFB9
32504	chr12	108953800	108958149	SART3
32504	chr12	108953800	108958149	ISCU
32504	chr12	108953800	108958149	ISCU
32504	chr12	108953800	108958149	ISCU
32504	chr12	108953800	108958149	ISCU
17794	chr6	80245700	80248499	LCA5
17794	chr6	80245700	80248499	LCA5
13038	chr4	119198500	119201179	SNHG8
13038	chr4	119198500	119201179	SNHG8
13038	chr4	119198500	119201179	SNHG8
13038	chr4	119198500	119201179	SNORA24
12977	chr4	108909080	108915199	HADH
12977	chr4	108909080	108915199	HADH
34401	chr14	23562950	23566399	ACIN1
34401	chr14	23562950	23566399	ACIN1
34401	chr14	23562950	23566399	ACIN1
34401	chr14	23562950	23566399	C14orf119
24727	chr9	115140230	115144799	HSDL2
24727	chr9	115140230	115144799	HSDL2
24727	chr9	115140230	115144799	HSDL2
23029	chr8	125461700	125464379	TRMT12
47350	chr22	20007050	20015199	TANGO2
47350	chr22	20007050	20015199	TANGO2
47350	chr22	20007050	20015199	TANGO2
47350	chr22	20007050	20015199	TANGO2
47350	chr22	20007050	20015199	TANGO2
47350	chr22	20007050	20015199	TANGO2
47350	chr22	20007050	20015199	TANGO2
47350	chr22	20007050	20015199	TANGO2
47350	chr22	20007050	20015199	TANGO2
47350	chr22	20007050	20015199	TANGO2
47350	chr22	20007050	20015199	TANGO2
20800	chr7	124568630	124571849	POT1
20800	chr7	124568630	124571849	POT1
20800	chr7	124568630	124571849	POT1
20800	chr7	124568630	124571849	POT1
20800	chr7	124568630	124571849	POT1
20800	chr7	124568630	124571849	POT1-AS1
20800	chr7	124568630	124571849	POT1-AS1
36262	chr15	45001650	45005929	B2M
42548	chr18	14131050	14133949	ZNF519
42548	chr18	14131050	14133949	ZNF519
33996	chr13	98084030	98088049	RAP2A
44772	chr19	45969700	45974279	FOSB
44772	chr19	45969700	45974279	FOSB
16875	chr6	26031080	26035449	HIST1H3B
16875	chr6	26031080	26035449	HIST1H2AB
33815	chr13	52373580	52380699	DHRS12
33815	chr13	52373580	52380699	DHRS12
33815	chr13	52373580	52380699	DHRS12
14761	chr5	89704300	89706999	CETN3
14761	chr5	89704300	89706999	CETN3
14761	chr5	89704300	89706999	CETN3
14761	chr5	89704300	89706999	LOC731157
44954	chr19	49374150	49383779	PPP1R15A
28793	chr11	17097780	17100799	RPS13
9547	chr3	42630950	42634099	SS18L2
48089	chr22	39100280	39103749	GTPBP1
26130	chr10	27527880	27533349	ACBD5
26130	chr10	27527880	27533349	ACBD5
26130	chr10	27527880	27533349	ACBD5
26130	chr10	27527880	27533349	ACBD5
26130	chr10	27527880	27533349	ACBD5
26130	chr10	27527880	27533349	ACBD5
26130	chr10	27527880	27533349	ACBD5
6740	chr2	98278250	98282099	ACTR1B
2952	chr1	150252980	150256829	CIART
2952	chr1	150252980	150256829	CIART
2952	chr1	150252980	150256829	CIART
2952	chr1	150252980	150256829	CIART
2952	chr1	150252980	150256829	CIART
39591	chr16	87349600	87352379	C16orf95
39591	chr16	87349600	87352379	C16orf95
39591	chr16	87349600	87352379	C16orf95
24486	chr9	100393630	100397449	TSTD2
24486	chr9	100393630	100397449	NCBP1
45216	chr19	57348680	57352949	ZIM2
45216	chr19	57348680	57352949	ZIM2
45216	chr19	57348680	57352949	ZIM2
45216	chr19	57348680	57352949	PEG3
45216	chr19	57348680	57352949	PEG3
45216	chr19	57348680	57352949	PEG3
45216	chr19	57348680	57352949	PEG3
45216	chr19	57348680	57352949	MIMT1
17393	chr6	41038650	41043179	OARD1
17393	chr6	41038650	41043179	NFYA
17393	chr6	41038650	41043179	NFYA
46261	chr20	47661380	47664479	CSE1L-AS1
46261	chr20	47661380	47664479	CSE1L-AS1
46261	chr20	47661380	47664479	CSE1L
46261	chr20	47661380	47664479	CSE1L
46261	chr20	47661380	47664479	CSE1L
2755	chr1	118147080	118150999	LOC100996263
2755	chr1	118147080	118150999	FAM46C
16755	chr6	16758000	16764699	ATXN1
16755	chr6	16758000	16764699	ATXN1
27182	chr10	85898630	85900899	GHITM
47246	chr22	18119450	18123729	BCL2L13
47246	chr22	18119450	18123729	BCL2L13
47246	chr22	18119450	18123729	BCL2L13
47246	chr22	18119450	18123729	BCL2L13
47246	chr22	18119450	18123729	BCL2L13
47246	chr22	18119450	18123729	BCL2L13
47246	chr22	18119450	18123729	BCL2L13
47246	chr22	18119450	18123729	BCL2L13
47246	chr22	18119450	18123729	BCL2L13
47246	chr22	18119450	18123729	BCL2L13
31228	chr12	10873900	10877329	YBX3
31228	chr12	10873900	10877329	YBX3
22404	chr8	66545030	66547249	ARMC1
22404	chr8	66545030	66547249	ARMC1
33168	chr12	133462700	133465829	CHFR
33168	chr12	133462700	133465829	CHFR
33168	chr12	133462700	133465829	CHFR
33168	chr12	133462700	133465829	CHFR
33168	chr12	133462700	133465829	CHFR
33168	chr12	133462700	133465829	LOC101928530
36905	chr15	72408500	72411899	MYO9A
36905	chr15	72408500	72411899	SENP8
36905	chr15	72408500	72411899	SENP8
36905	chr15	72408500	72411899	SENP8
36905	chr15	72408500	72411899	SENP8
36905	chr15	72408500	72411899	SENP8
24491	chr9	100682930	100685849	C9orf156
44767	chr19	45925480	45929429	ERCC1
44767	chr19	45925480	45929429	ERCC1
44767	chr19	45925480	45929429	ERCC1
19796	chr7	45024680	45027729	SNHG15
19796	chr7	45024680	45027729	SNORA9
48120	chr22	39708250	39717429	RPL3
48120	chr22	39708250	39717429	RPL3
48120	chr22	39708250	39717429	SNORD83B
48120	chr22	39708250	39717429	SNORD83A
48120	chr22	39708250	39717429	RNU86
48120	chr22	39708250	39717429	SNORD43
24076	chr9	72872350	72875429	SMC5-AS1
24076	chr9	72872350	72875429	SMC5
10359	chr3	99535150	99538029	CMSS1
273	chr1	7842150	7846079	PER3
273	chr1	7842150	7846079	PER3
273	chr1	7842150	7846079	PER3
273	chr1	7842150	7846079	PER3
273	chr1	7842150	7846079	PER3
4712	chr1	235664550	235669879	B3GALNT2
4712	chr1	235664550	235669879	B3GALNT2
45268	chr19	58837180	58839779	ZSCAN22
44198	chr19	18666650	18670099	KXD1
44198	chr19	18666650	18670099	KXD1
44198	chr19	18666650	18670099	KXD1
17036	chr6	31163650	31167429	HCG27
33930	chr13	77598650	77602629	FBXL3
15243	chr5	137909850	137912979	HSPA9
23720	chr9	26891450	26893899	CAAP1
23720	chr9	26891450	26893899	CAAP1
32401	chr12	104322130	104325649	TTC41P
32401	chr12	104322130	104325649	HSP90B1
32401	chr12	104322130	104325649	MIR3652
31769	chr12	51631000	51634649	DAZAP2
31769	chr12	51631000	51634649	DAZAP2
31769	chr12	51631000	51634649	DAZAP2
31769	chr12	51631000	51634649	DAZAP2
31769	chr12	51631000	51634649	DAZAP2
31769	chr12	51631000	51634649	DAZAP2
27340	chr10	93682350	93685049	BTAF1
3013	chr1	151880650	151883399	THEM4
2544	chr1	110949050	110951679	LAMTOR5
2544	chr1	110949050	110951679	LAMTOR5-AS1
43772	chr19	9544900	9547679	ZNF266
43772	chr19	9544900	9547679	ZNF266
35268	chr14	77922580	77925849	VIPAS39
35268	chr14	77922580	77925849	VIPAS39
35268	chr14	77922580	77925849	VIPAS39
35268	chr14	77922580	77925849	VIPAS39
35268	chr14	77922580	77925849	VIPAS39
35268	chr14	77922580	77925849	AHSA1
5701	chr2	39346100	39353079	SOS1
28601	chr11	10771250	10774279	CTR9
10595	chr3	121467180	121470199	GOLGB1
10595	chr3	121467180	121470199	GOLGB1
10595	chr3	121467180	121470199	GOLGB1
10595	chr3	121467180	121470199	GOLGB1
42408	chr18	9135100	9139099	NDUFV2-AS1
42408	chr18	9135100	9139099	NDUFV2-AS1
42408	chr18	9135100	9139099	ANKRD12
42408	chr18	9135100	9139099	ANKRD12
42408	chr18	9135100	9139099	ANKRD12
41227	chr17	47863100	47867949	KAT7
41227	chr17	47863100	47867949	KAT7
41227	chr17	47863100	47867949	KAT7
41227	chr17	47863100	47867949	KAT7
41227	chr17	47863100	47867949	KAT7
29501	chr11	64083600	64088099	TRMT112
29501	chr11	64083600	64088099	TRMT112
29501	chr11	64083600	64088099	TRMT112
29501	chr11	64083600	64088099	PRDX5
29501	chr11	64083600	64088099	PRDX5
29501	chr11	64083600	64088099	PRDX5
30058	chr11	82610080	82613249	PRCP
30058	chr11	82610080	82613249	PRCP
30058	chr11	82610080	82613249	DDIAS
10860	chr3	128596830	128600349	ACAD9
10860	chr3	128596830	128600349	ACAD9
27358	chr10	94350180	94353279	KIF11
3834	chr1	201923050	201926099	TIMM17A
33441	chr13	33111130	33114249	N4BP2L2
33441	chr13	33111130	33114249	N4BP2L2
33441	chr13	33111130	33114249	N4BP2L2
36641	chr15	66082880	66086079	DENND4A
36641	chr15	66082880	66086079	DENND4A
2889	chr1	147399550	147401879	GPR89B
11901	chr3	197280050	197283479	BDH1
11901	chr3	197280050	197283479	BDH1
12771	chr4	84374650	84378099	HELQ
12771	chr4	84374650	84378099	HELQ
12771	chr4	84374650	84378099	HELQ
12771	chr4	84374650	84378099	HELQ
12771	chr4	84374650	84378099	HELQ
12771	chr4	84374650	84378099	HELQ
12771	chr4	84374650	84378099	HELQ
12771	chr4	84374650	84378099	MRPS18C
12771	chr4	84374650	84378099	MRPS18C
12771	chr4	84374650	84378099	MRPS18C
12771	chr4	84374650	84378099	MRPS18C
16877	chr6	26055050	26058129	HIST1H1C
10392	chr3	99978000	99981229	TBC1D23
10392	chr3	99978000	99981229	TBC1D23
23738	chr9	33000280	33002949	APTX
23738	chr9	33000280	33002949	APTX
23738	chr9	33000280	33002949	APTX
23738	chr9	33000280	33002949	APTX
23738	chr9	33000280	33002949	APTX
23738	chr9	33000280	33002949	APTX
23738	chr9	33000280	33002949	APTX
23738	chr9	33000280	33002949	APTX
23738	chr9	33000280	33002949	APTX
23738	chr9	33000280	33002949	APTX
23738	chr9	33000280	33002949	APTX
23738	chr9	33000280	33002949	APTX
11332	chr3	169488650	169492449	ACTRT3
11332	chr3	169488650	169492449	MYNN
11332	chr3	169488650	169492449	MYNN
11332	chr3	169488650	169492449	MYNN
11332	chr3	169488650	169492449	MYNN
11332	chr3	169488650	169492449	MYNN
3292	chr1	162529900	162533179	UAP1
29237	chr11	47868580	47871349	NUP160
43927	chr19	13000330	13003249	KLF1
43927	chr19	13000330	13003249	GCDH
43927	chr19	13000330	13003249	GCDH
43927	chr19	13000330	13003249	GCDH
43927	chr19	13000330	13003249	GCDH
9844	chr3	51532450	51535679	VPRBP
9844	chr3	51532450	51535679	VPRBP
2933	chr1	149870330	149872699	BOLA1
38461	chr16	25116900	25124479	LCMT1-AS1
38461	chr16	25116900	25124479	LCMT1
38461	chr16	25116900	25124479	LCMT1
4016	chr1	205717250	205720799	NUCKS1
23569	chr9	5436450	5439599	PLGRKT
18207	chr6	126100880	126103149	NCOA7
18207	chr6	126100880	126103149	NCOA7
40063	chr17	7153050	7157199	CTDNEP1
40063	chr17	7153050	7157199	CTDNEP1
40063	chr17	7153050	7157199	ELP5
40063	chr17	7153050	7157199	ELP5
40063	chr17	7153050	7157199	ELP5
40063	chr17	7153050	7157199	ELP5
36368	chr15	55487750	55490679	RSL24D1
11251	chr3	156876200	156880549	CCNL1
11251	chr3	156876200	156880549	CCNL1
43646	chr19	5716630	5721979	LONP1
43646	chr19	5716630	5721979	LONP1
43646	chr19	5716630	5721979	LONP1
43646	chr19	5716630	5721979	LONP1
43646	chr19	5716630	5721979	CATSPERD
16415	chr6	4020650	4023229	PRPF4B
14776	chr5	90674700	90680579	ARRDC3
14776	chr5	90674700	90680579	ARRDC3-AS1
41296	chr17	48939780	48947499	TOB1
41296	chr17	48939780	48947499	TOB1
41296	chr17	48939780	48947499	TOB1
41296	chr17	48939780	48947499	TOB1-AS1
31872	chr12	54670750	54676199	CBX5
31872	chr12	54670750	54676199	HNRNPA1
31872	chr12	54670750	54676199	HNRNPA1
31872	chr12	54670750	54676199	HNRNPA1P10
13044	chr4	119605550	119607849	LOC101929741
13044	chr4	119605550	119607849	METTL14
16157	chr5	175873480	175876849	FAF2
29648	chr11	67006080	67009449	KDM2A
13711	chr4	186057680	186068749	SLC25A4
32968	chr12	123716280	123719599	MPHOSPH9
32968	chr12	123716280	123719599	MPHOSPH9
32968	chr12	123716280	123719599	C12orf65
32968	chr12	123716280	123719599	C12orf65
32968	chr12	123716280	123719599	C12orf65
44279	chr19	22017630	22020449	ZNF43
44279	chr19	22017630	22020449	ZNF43
23815	chr9	34987800	34998499	DNAJB5-AS1
23815	chr9	34987800	34998499	DNAJB5
23815	chr9	34987800	34998499	DNAJB5
23815	chr9	34987800	34998499	DNAJB5
14739	chr5	82371930	82374779	TMEM167A
14739	chr5	82371930	82374779	XRCC4
14739	chr5	82371930	82374779	XRCC4
14739	chr5	82371930	82374779	XRCC4
20051	chr7	66117830	66121199	LOC100996437
8146	chr2	211034230	211037729	KANSL1L
8146	chr2	211034230	211037729	KANSL1L
10527	chr3	114864330	114868149	ZBTB20
14827	chr5	98262550	98266879	CHD1
14827	chr5	98262550	98266879	LOC100289230
47683	chr22	28313550	28317049	PITPNB
47683	chr22	28313550	28317049	PITPNB
47683	chr22	28313550	28317049	PITPNB
47683	chr22	28313550	28317049	TTC28-AS1
47683	chr22	28313550	28317049	TTC28-AS1
47683	chr22	28313550	28317049	MIR3199-1
47683	chr22	28313550	28317049	MIR3199-2
20500	chr7	100024730	100029729	ZCWPW1
20500	chr7	100024730	100029729	ZCWPW1
20500	chr7	100024730	100029729	MEPCE
20500	chr7	100024730	100029729	MEPCE
20500	chr7	100024730	100029729	MEPCE
20500	chr7	100024730	100029729	MEPCE
24729	chr9	115479080	115481299	INIP
18706	chr6	158588380	158590799	SERAC1
18706	chr6	158588380	158590799	SERAC1
18706	chr6	158588380	158590799	GTF2H5
2642	chr1	115051650	115055649	TRIM33
2642	chr1	115051650	115055649	TRIM33
3152	chr1	155825800	155831429	GON4L
3152	chr1	155825800	155831429	GON4L
3152	chr1	155825800	155831429	GON4L
3152	chr1	155825800	155831429	GON4L
3152	chr1	155825800	155831429	GON4L
3152	chr1	155825800	155831429	SYT11
29306	chr11	59381480	59385129	OSBP
40038	chr17	5321550	5324999	NUP88
40038	chr17	5321550	5324999	RPAIN
40038	chr17	5321550	5324999	RPAIN
40038	chr17	5321550	5324999	RPAIN
40038	chr17	5321550	5324999	RPAIN
40038	chr17	5321550	5324999	RPAIN
40038	chr17	5321550	5324999	RPAIN
40038	chr17	5321550	5324999	RPAIN
40038	chr17	5321550	5324999	RPAIN
40038	chr17	5321550	5324999	RPAIN
40038	chr17	5321550	5324999	RPAIN
13083	chr4	120374380	120377649	LOC645513
45023	chr19	50527400	50530649	VRK3
45023	chr19	50527400	50530649	VRK3
45023	chr19	50527400	50530649	VRK3
45023	chr19	50527400	50530649	ZNF473
45023	chr19	50527400	50530649	ZNF473
45023	chr19	50527400	50530649	ZNF473
9749	chr3	49065280	49067929	IMPDH2
29634	chr11	66443900	66446849	RBM4B
29634	chr11	66443900	66446849	RBM4B
32655	chr12	112449480	112453029	TMEM116
32655	chr12	112449480	112453029	TMEM116
32655	chr12	112449480	112453029	TMEM116
32655	chr12	112449480	112453029	TMEM116
32655	chr12	112449480	112453029	TMEM116
32655	chr12	112449480	112453029	ERP29
32655	chr12	112449480	112453029	ERP29
33325	chr13	28021600	28026249	MTIF3
33325	chr13	28021600	28026249	MTIF3
33325	chr13	28021600	28026249	MTIF3
33325	chr13	28021600	28026249	MTIF3
31188	chr12	8233550	8235979	NECAP1
31188	chr12	8233550	8235979	NECAP1
13483	chr4	159643180	159645949	PPID
2209	chr1	85740730	85743849	BCL10
2209	chr1	85740730	85743849	LOC646626
30787	chr11	129870500	129875229	PRDM10
30787	chr11	129870500	129875229	PRDM10
30787	chr11	129870500	129875229	LINC00167
42287	chr18	2654000	2657849	CBX3P2
42287	chr18	2654000	2657849	SMCHD1
19110	chr7	1568950	1581479	MAFK
43880	chr19	11668800	11671299	ELOF1
12168	chr4	8441200	8443449	ACOX3
12168	chr4	8441200	8443449	ACOX3
12168	chr4	8441200	8443449	TRMT44
34376	chr14	23056900	23059779	DAD1
38254	chr16	15735530	15738299	KIAA0430
38254	chr16	15735530	15738299	KIAA0430
38254	chr16	15735530	15738299	KIAA0430
38254	chr16	15735530	15738299	NDE1
38254	chr16	15735530	15738299	MIR484
7145	chr2	120123050	120129629	C2orf76
7145	chr2	120123050	120129629	DBI
7145	chr2	120123050	120129629	DBI
7145	chr2	120123050	120129629	DBI
7145	chr2	120123050	120129629	DBI
7145	chr2	120123050	120129629	DBI
7145	chr2	120123050	120129629	DBI
7145	chr2	120123050	120129629	DBI
7145	chr2	120123050	120129629	DBI
7145	chr2	120123050	120129629	DBI
7145	chr2	120123050	120129629	DBI
7145	chr2	120123050	120129629	DBI
7145	chr2	120123050	120129629	DBI
30698	chr11	125460750	125465349	STT3A
30698	chr11	125460750	125465349	STT3A
30698	chr11	125460750	125465349	STT3A
29493	chr11	64006800	64011179	FKBP2
29493	chr11	64006800	64011179	FKBP2
29493	chr11	64006800	64011179	FKBP2
20247	chr7	75573530	75581949	SNORA14A
1753	chr1	53661350	53665879	CPT2
1586	chr1	45204230	45206479	KIF2C
1586	chr1	45204230	45206479	KIF2C
47421	chr22	22018830	22021879	PPIL2
47421	chr22	22018830	22021879	PPIL2
47421	chr22	22018830	22021879	PPIL2
10404	chr3	101291700	101294679	PCNP
22825	chr8	103249680	103253099	RRM2B
22825	chr8	103249680	103253099	RRM2B
22825	chr8	103249680	103253099	RRM2B
22825	chr8	103249680	103253099	UBR5-AS1
11109	chr3	142165400	142168129	XRN1
11109	chr3	142165400	142168129	XRN1
11109	chr3	142165400	142168129	XRN1
10505	chr3	113463550	113467399	NAA50
10505	chr3	113463550	113467399	NAA50
10505	chr3	113463550	113467399	ATP6V1A
45178	chr19	56055250	56062499	SBK3
18076	chr6	112407500	112410049	TUBE1
18076	chr6	112407500	112410049	FAM229B
44169	chr19	18302250	18307799	MPV17L2
31928	chr12	56691730	56697199	CS
46264	chr20	47834380	47837629	DDX27
18627	chr6	155634150	155637179	TFB1M
32836	chr12	120965500	120968729	COQ5
38312	chr16	19077530	19080679	LOC102723385
38312	chr16	19077530	19080679	LOC102723385
38312	chr16	19077530	19080679	LOC102723385
38312	chr16	19077530	19080679	LOC102723385
38312	chr16	19077530	19080679	COQ7
38312	chr16	19077530	19080679	COQ7
5941	chr2	46842250	46845549	PIGF
5941	chr2	46842250	46845549	PIGF
5941	chr2	46842250	46845549	CRIPT
9830	chr3	50603050	50608629	C3orf18
9830	chr3	50603050	50608629	C3orf18
9830	chr3	50603050	50608629	C3orf18
9830	chr3	50603050	50608629	C3orf18
9830	chr3	50603050	50608629	HEMK1
11185	chr3	150320050	150323649	SELT
9210	chr3	19987130	19990399	RAB5A
9210	chr3	19987130	19990399	RAB5A
22426	chr8	67339500	67352799	RRS1-AS1
22426	chr8	67339500	67352799	RRS1
22426	chr8	67339500	67352799	ADHFE1
17560	chr6	44353780	44356679	CDC5L
12966	chr4	106628550	106631149	INTS12
12966	chr4	106628550	106631149	INTS12
12966	chr4	106628550	106631149	GSTCD
12966	chr4	106628550	106631149	GSTCD
30068	chr11	82781500	82784879	RAB30
30068	chr11	82781500	82784879	RAB30
30068	chr11	82781500	82784879	RAB30
30068	chr11	82781500	82784879	RAB30-AS1
2346	chr1	94343330	94345849	DNTTIP2
22515	chr8	80940930	80943799	MRPS28
44445	chr19	36245350	36250449	HSPB6
44445	chr19	36245350	36250449	PROSER3
3451	chr1	171453880	171456229	PRRC2C
31168	chr12	7078100	7081399	PHB2
31168	chr12	7078100	7081399	PHB2
31168	chr12	7078100	7081399	SCARNA12
31168	chr12	7078100	7081399	EMG1
19417	chr7	23219800	23223479	NUPL2
34596	chr14	39638330	39640749	TRAPPC6B
34596	chr14	39638330	39640749	TRAPPC6B
34596	chr14	39638330	39640749	PNN
13427	chr4	153699630	153702649	TIGD4
13427	chr4	153699630	153702649	ARFIP1
13427	chr4	153699630	153702649	ARFIP1
13427	chr4	153699630	153702649	ARFIP1
13427	chr4	153699630	153702649	ARFIP1
13427	chr4	153699630	153702649	ARFIP1
13427	chr4	153699630	153702649	ARFIP1
23158	chr8	132914880	132918099	EFR3A
17195	chr6	34662350	34666099	C6orf106
17195	chr6	34662350	34666099	C6orf106
10957	chr3	133291050	133294729	CDV3
10957	chr3	133291050	133294729	CDV3
10957	chr3	133291050	133294729	CDV3
10957	chr3	133291050	133294729	CDV3
10957	chr3	133291050	133294729	CDV3
10957	chr3	133291050	133294729	CDV3
10957	chr3	133291050	133294729	CDV3
9501	chr3	40497130	40500349	ENTPD3-AS1
9501	chr3	40497130	40500349	RPL14
9501	chr3	40497130	40500349	RPL14
9689	chr3	47820850	47825529	SMARCC1
7108	chr2	114194430	114196699	CBWD2
15892	chr5	162885880	162888999	NUDCD2
15892	chr5	162885880	162888999	HMMR
15892	chr5	162885880	162888999	HMMR
15892	chr5	162885880	162888999	HMMR
15892	chr5	162885880	162888999	HMMR
17136	chr6	33376700	33380679	PHF1
17136	chr6	33376700	33380679	PHF1
17136	chr6	33376700	33380679	PHF1
34675	chr14	53017850	53021579	TXNDC16
34675	chr14	53017850	53021579	TXNDC16
34675	chr14	53017850	53021579	GPR137C
7404	chr2	136287250	136290749	ZRANB3
7404	chr2	136287250	136290749	ZRANB3
7404	chr2	136287250	136290749	ZRANB3
7404	chr2	136287250	136290749	R3HDM1
7404	chr2	136287250	136290749	R3HDM1
43281	chr18	74201750	74209379	ZNF516
43281	chr18	74201750	74209379	C18orf65
27787	chr10	112677480	112681149	BBIP1
27787	chr10	112677480	112681149	BBIP1
27787	chr10	112677480	112681149	BBIP1
27787	chr10	112677480	112681149	BBIP1
27787	chr10	112677480	112681149	BBIP1
27787	chr10	112677480	112681149	SHOC2
36158	chr15	41574680	41577679	OIP5-AS1
1214	chr1	33114930	33118349	ZBTB8OS
1214	chr1	33114930	33118349	ZBTB8OS
1214	chr1	33114930	33118349	ZBTB8OS
1214	chr1	33114930	33118349	ZBTB8OS
1214	chr1	33114930	33118349	ZBTB8OS
1214	chr1	33114930	33118349	ZBTB8OS
1214	chr1	33114930	33118349	ZBTB8OS
1214	chr1	33114930	33118349	ZBTB8OS
1214	chr1	33114930	33118349	RBBP4
1214	chr1	33114930	33118349	RBBP4
1214	chr1	33114930	33118349	RBBP4
23931	chr9	41952980	41955949	GLIDR
23931	chr9	41952980	41955949	GLIDR
23931	chr9	41952980	41955949	GLIDR
23931	chr9	41952980	41955949	GLIDR
19514	chr7	30065150	30069749	FKBP14
19514	chr7	30065150	30069749	FKBP14
19514	chr7	30065150	30069749	FKBP14
19514	chr7	30065150	30069749	PLEKHA8
19514	chr7	30065150	30069749	PLEKHA8
19514	chr7	30065150	30069749	PLEKHA8
40966	chr17	41320780	41324949	LOC101929767
40966	chr17	41320780	41324949	NBR1
40966	chr17	41320780	41324949	NBR1
40966	chr17	41320780	41324949	NBR1
40966	chr17	41320780	41324949	NBR1
3192	chr1	156696950	156700279	ISG20L2
3192	chr1	156696950	156700279	RRNAD1
3192	chr1	156696950	156700279	RRNAD1
2644	chr1	115211250	115214149	DENND2C
2644	chr1	115211250	115214149	DENND2C
13717	chr4	186345780	186348549	UFSP2
13717	chr4	186345780	186348549	UFSP2
13717	chr4	186345780	186348549	C4orf47
40820	chr17	37616300	37620499	CDK12
40820	chr17	37616300	37620499	CDK12
39219	chr16	71841180	71844549	AP1G1
39219	chr16	71841180	71844549	AP1G1
31709	chr12	50134480	50137129	TMBIM6
31709	chr12	50134480	50137129	TMBIM6
29437	chr11	62597750	62601149	STX5
29437	chr11	62597750	62601149	STX5
41857	chr17	73778050	73783629	H3F3B
41857	chr17	73778050	73783629	MIR4738
41857	chr17	73778050	73783629	UNK
41857	chr17	73778050	73783629	UNK
20770	chr7	117822500	117825329	LSM8
14622	chr5	74631430	74634449	HMGCR
14622	chr5	74631430	74634449	HMGCR
36258	chr15	44827250	44830899	EIF3J-AS1
36258	chr15	44827250	44830899	EIF3J-AS1
36258	chr15	44827250	44830899	EIF3J
36258	chr15	44827250	44830899	EIF3J
36258	chr15	44827250	44830899	EIF3J
6672	chr2	96674880	96677879	FAHD2CP
30270	chr11	107990350	107997579	ACAT1
2470	chr1	109631900	109634649	TMEM167B
35609	chr14	102273750	102277599	PPP2R5C
35609	chr14	102273750	102277599	PPP2R5C
35609	chr14	102273750	102277599	PPP2R5C
44793	chr19	46193900	46197549	SNRPD2
44793	chr19	46193900	46197549	SNRPD2
44793	chr19	46193900	46197549	QPCTL
44793	chr19	46193900	46197549	QPCTL
43059	chr18	55287630	55290749	NARS
33296	chr13	25874200	25877199	NUPL1
33296	chr13	25874200	25877199	NUPL1
[truncated: 10,861 more rows]
