# Supplementary material for: H3K27ac acetylome signatures reveal the epigenomic reorganization in remodeled non-failing human hearts
Source: Clin Epigenetics. 2020 Jul 14;12:106. doi: 10.1186/s13148-020-00895-5 (PMC7362435; doi:10.1186/s13148-020-00895-5)
Supplement: Supplementary file 10 — Additional file 10. Supplementary Table 4. Differentially expressed genes between patients and controls. [file 13148_2020_895_MOESM10_ESM.xlsx]

## Sheet: Supplementary Table 4
Supplementary Table 4: Differentailly expressed genes between patients and controls.
Ensembl gene ID	log2 Fold Change	Non-adjusted p-value	Ajusted p-value	Gene	Gene Name
ENSG00000000003	-0.104271	0.67064	0.845651	TSPAN6	tetraspanin 6
ENSG00000000005	0.685662	0.176785	0.422987	TNMD	tenomodulin
ENSG00000000419	0.129182	0.645968	0.831122	DPM1	dolichyl-phosphate mannosyltransferase subunit 1, catalytic
ENSG00000000457	-0.242355	0.418301	0.671606	SCYL3	SCY1 like pseudokinase 3
ENSG00000000460	-0.11804	0.711122	0.866223	C1orf112	chromosome 1 open reading frame 112
ENSG00000000938	-0.49587	0.312188	0.574086	FGR	FGR proto-oncogene, Src family tyrosine kinase
ENSG00000000971	0.150218	0.588476	0.793212	CFH	complement factor H
ENSG00000001036	-0.460997	0.029542	0.147127	FUCA2	alpha-L-fucosidase 2
ENSG00000001084	0.51838	0.0198318	0.116062	GCLC	glutamate-cysteine ligase catalytic subunit
ENSG00000001167	-0.134377	0.778876	0.903125	NFYA	nuclear transcription factor Y subunit alpha
ENSG00000001460	-0.069365	0.745651	0.885792	STPG1	sperm tail PG-rich repeat containing 1
ENSG00000001461	-0.106065	0.614394	0.811827	NIPAL3	NIPA like domain containing 3
ENSG00000001497	-0.140586	0.682195	0.851621	LAS1L	LAS1 like, ribosome biogenesis factor
ENSG00000001561	-0.533021	0.0310097	0.151351	ENPP4	ectonucleotide pyrophosphatase/phosphodiesterase 4
ENSG00000001617	-0.396949	0.357646	0.617512	SEMA3F	semaphorin 3F
ENSG00000001626	0.635638	0.210815	NA	CFTR	cystic fibrosis transmembrane conductance regulator
ENSG00000001629	0.242987	0.272684	0.536187	ANKIB1	ankyrin repeat and IBR domain containing 1
ENSG00000001630	0.364376	0.136979	0.364096	CYP51A1	cytochrome P450 family 51 subfamily A member 1
ENSG00000001631	0.59554	0.0133293	0.0932335	KRIT1	KRIT1, ankyrin repeat containing
ENSG00000002016	1.68009	5.3903e-05	0.00415209	RAD52	RAD52 homolog, DNA repair protein
ENSG00000002079	0.0591064	0.812399	NA	NA	NA
ENSG00000002330	-0.566752	0.121684	0.338309	BAD	BCL2 associated agonist of cell death
ENSG00000002549	0.00393762	0.989912	0.997146	LAP3	leucine aminopeptidase 3
ENSG00000002586	-0.651173	0.000702239	0.018121	CD99	CD99 molecule (Xg blood group)
ENSG00000002587	-0.586043	0.024657	0.132372	HS3ST1	heparan sulfate-glucosamine 3-sulfotransferase 1
ENSG00000002726	0.15813	0.751271	NA	AOC1	amine oxidase, copper containing 1
ENSG00000002745	0.0547577	0.825961	NA	WNT16	Wnt family member 16
ENSG00000002746	0.855103	0.0671882	0.239678	HECW1	HECT, C2 and WW domain containing E3 ubiquitin protein ligase 1
ENSG00000002822	-0.0860328	0.863249	0.942126	MAD1L1	mitotic arrest deficient 1 like 1
ENSG00000002834	-0.478442	0.0250794	0.133532	LASP1	LIM and SH3 protein 1
ENSG00000002919	-0.405852	0.173235	0.418146	SNX11	sorting nexin 11
ENSG00000002933	-0.392938	0.293558	0.557045	TMEM176A	transmembrane protein 176A
ENSG00000003056	-0.296692	0.0670821	0.239621	M6PR	mannose-6-phosphate receptor, cation dependent
ENSG00000003096	0.370493	0.266345	0.529712	KLHL13	kelch like family member 13
ENSG00000003137	-0.250137	0.611147	0.809439	CYP26B1	cytochrome P450 family 26 subfamily B member 1
ENSG00000003147	-0.192564	0.277733	0.540938	ICA1	islet cell autoantigen 1
ENSG00000003249	0.507526	0.231946	0.491393	DBNDD1	dysbindin domain containing 1
ENSG00000003393	0.476289	0.0508539	0.203269	ALS2	ALS2, alsin Rho guanine nucleotide exchange factor
ENSG00000003400	0.35737	0.161427	0.401283	CASP10	caspase 10
ENSG00000003402	0.0187657	0.878865	0.948397	CFLAR	CASP8 and FADD like apoptosis regulator
ENSG00000003436	0.467472	0.0377096	0.169954	TFPI	tissue factor pathway inhibitor
ENSG00000003509	-0.109779	0.604046	0.804484	NDUFAF7	NADH:ubiquinone oxidoreductase complex assembly factor 7
ENSG00000003756	0.173475	0.4725	0.714043	RBM5	RNA binding motif protein 5
ENSG00000003987	0.193766	0.70169	NA	MTMR7	myotubularin related protein 7
ENSG00000003989	-0.0629097	0.852233	0.937381	SLC7A2	solute carrier family 7 member 2
ENSG00000004059	-0.715864	0.0141979	0.096397	ARF5	ADP ribosylation factor 5
ENSG00000004139	0.43355	0.23005	0.489219	SARM1	sterile alpha and TIR motif containing 1
ENSG00000004142	-0.322348	0.192016	0.443	POLDIP2	DNA polymerase delta interacting protein 2
ENSG00000004399	-0.773922	0.0363253	0.166041	PLXND1	plexin D1
ENSG00000004455	-0.0651906	0.777226	0.902119	AK2	adenylate kinase 2
ENSG00000004468	-0.144755	0.720598	0.871204	CD38	CD38 molecule
ENSG00000004478	-0.345922	0.189872	0.440159	FKBP4	FK506 binding protein 4
ENSG00000004487	0.0820679	0.802055	0.91479	KDM1A	lysine demethylase 1A
ENSG00000004534	-0.179487	0.258279	0.521257	RBM6	RNA binding motif protein 6
ENSG00000004660	0.197714	0.551276	0.769434	CAMKK1	calcium/calmodulin dependent protein kinase kinase 1
ENSG00000004700	0.335392	0.251187	0.513243	RECQL	RecQ like helicase
ENSG00000004766	0.250464	0.323856	0.585999	VPS50	VPS50, EARP/GARPII complex subunit
ENSG00000004776	0.156328	0.670172	0.84541	HSPB6	heat shock protein family B (small) member 6
ENSG00000004777	-0.244122	0.622489	0.816882	ARHGAP33	Rho GTPase activating protein 33
ENSG00000004779	-0.195566	0.4877	0.725329	NDUFAB1	NADH:ubiquinone oxidoreductase subunit AB1
ENSG00000004799	-0.92399	0.0437126	0.185446	PDK4	pyruvate dehydrogenase kinase 4
ENSG00000004809	0.338609	0.457017	NA	SLC22A16	solute carrier family 22 member 16
ENSG00000004838	1.00754	0.0477328	NA	ZMYND10	zinc finger MYND-type containing 10
ENSG00000004846	0.93858	0.00840917	0.0710107	ABCB5	ATP binding cassette subfamily B member 5
ENSG00000004848	0.0910767	0.723231	NA	ARX	aristaless related homeobox
ENSG00000004864	-0.443638	0.114854	0.326736	SLC25A13	solute carrier family 25 member 13
ENSG00000004866	-0.57736	0.0192802	0.114281	ST7	suppression of tumorigenicity 7
ENSG00000004897	-0.244827	0.232897	0.492561	CDC27	cell division cycle 27
ENSG00000004939	0.398713	0.0540437	0.210854	SLC4A1	solute carrier family 4 member 1 (Diego blood group)
ENSG00000004948	0.0837664	0.745116	NA	CALCR	calcitonin receptor
ENSG00000004961	-0.274051	0.280951	0.543628	HCCS	holocytochrome c synthase
ENSG00000004975	0.0551498	0.898686	0.956778	DVL2	dishevelled segment polarity protein 2
ENSG00000005007	-0.33846	0.304227	0.566383	UPF1	UPF1, RNA helicase and ATPase
ENSG00000005020	-0.561782	0.0428112	0.183517	SKAP2	src kinase associated phosphoprotein 2
ENSG00000005022	0.228433	0.441078	0.689955	SLC25A5	solute carrier family 25 member 5
ENSG00000005059	-0.234775	0.525483	0.752356	MCUB	mitochondrial calcium uniporter dominant negative beta subunit
ENSG00000005075	-0.0251588	0.957502	0.984181	POLR2J	RNA polymerase II subunit J
ENSG00000005100	-0.492778	0.00845577	0.0713229	DHX33	DEAH-box helicase 33
ENSG00000005102	0.0170151	0.964425	0.987065	MEOX1	mesenchyme homeobox 1
ENSG00000005108	-0.340115	0.412654	0.666247	THSD7A	thrombospondin type 1 domain containing 7A
ENSG00000005156	0.497421	0.0883925	0.282118	LIG3	DNA ligase 3
ENSG00000005175	-0.118373	0.611566	0.809633	RPAP3	RNA polymerase II associated protein 3
ENSG00000005187	0.343128	0.286668	0.550062	ACSM3	acyl-CoA synthetase medium chain family member 3
ENSG00000005189	-0.232782	0.574223	0.783906	REXO5	RNA exonuclease 5
ENSG00000005194	-0.599342	0.00190946	0.0312959	CIAPIN1	cytokine induced apoptosis inhibitor 1
ENSG00000005206	-0.051613	0.885633	0.951351	SPPL2B	signal peptide peptidase like 2B
ENSG00000005238	-0.355362	0.312827	0.574547	FAM214B	family with sequence similarity 214 member B
ENSG00000005243	-0.350753	0.313291	0.575066	COPZ2	coatomer protein complex subunit zeta 2
ENSG00000005249	0.208332	0.512759	0.744537	PRKAR2B	protein kinase cAMP-dependent type II regulatory subunit beta
ENSG00000005302	-0.386019	0.204856	0.459323	MSL3	MSL complex subunit 3
ENSG00000005339	-0.180533	0.388296	0.645468	CREBBP	CREB binding protein
ENSG00000005379	0.00389467	0.992557	0.997973	TSPOAP1	TSPO associated protein 1
ENSG00000005381	0.0157317	0.94964	NA	MPO	myeloperoxidase
ENSG00000005421	0.27986	0.565067	NA	PON1	paraoxonase 1
ENSG00000005436	0.0572472	0.746847	0.886407	GCFC2	GC-rich sequence DNA-binding factor 2
ENSG00000005448	0.629038	0.0895217	0.283833	WDR54	WD repeat domain 54
ENSG00000005469	0.269209	0.35527	0.615036	CROT	carnitine O-octanoyltransferase
ENSG00000005471	-0.0880169	0.799385	0.913847	ABCB4	ATP binding cassette subfamily B member 4
ENSG00000005483	0.221933	0.389002	0.645921	KMT2E	lysine methyltransferase 2E
ENSG00000005486	-0.690211	0.0100605	0.0798505	RHBDD2	rhomboid domain containing 2
ENSG00000005513	-0.288732	0.543148	0.763704	SOX8	SRY-box 8
ENSG00000005700	0.459685	0.074079	0.253482	IBTK	inhibitor of Bruton tyrosine kinase
ENSG00000005801	0.800621	0.00569239	0.0577204	ZNF195	zinc finger protein 195
ENSG00000005810	0.249411	0.247013	0.508361	MYCBP2	MYC binding protein 2, E3 ubiquitin protein ligase
ENSG00000005812	-0.251749	0.154435	0.391538	FBXL3	F-box and leucine rich repeat protein 3
ENSG00000005844	0.986593	0.0100236	0.0797195	ITGAL	integrin subunit alpha L
ENSG00000005882	-0.534591	0.0952918	0.293955	PDK2	pyruvate dehydrogenase kinase 2
ENSG00000005884	0.75199	0.0164674	0.104086	ITGA3	integrin subunit alpha 3
ENSG00000005889	0.130414	0.567051	0.780015	ZFX	zinc finger protein X-linked
ENSG00000005893	-0.230527	0.158137	0.396631	LAMP2	lysosomal associated membrane protein 2
ENSG00000005961	0.373402	0.463646	NA	ITGA2B	integrin subunit alpha 2b
ENSG00000005981	0.490978	0.146997	0.379465	ASB4	ankyrin repeat and SOCS box containing 4
ENSG00000006007	0.143294	0.467879	0.710815	GDE1	glycerophosphodiester phosphodiesterase 1
ENSG00000006015	-0.191653	0.331017	0.593083	REX1BD	required for excision 1-B domain containing
ENSG00000006016	0.0564342	0.898018	0.956644	CRLF1	cytokine receptor like factor 1
ENSG00000006025	0.0490086	0.923375	NA	OSBPL7	oxysterol binding protein like 7
ENSG00000006042	-0.288248	0.299665	0.562668	TMEM98	transmembrane protein 98
ENSG00000006047	0.306871	0.546249	NA	YBX2	Y-box binding protein 2
ENSG00000006062	0.354371	0.274893	0.538146	MAP3K14	mitogen-activated protein kinase kinase kinase 14
ENSG00000006071	-0.0306788	0.949621	0.980764	ABCC8	ATP binding cassette subfamily C member 8
ENSG00000006116	0.326444	0.484488	NA	CACNG3	calcium voltage-gated channel auxiliary subunit gamma 3
ENSG00000006118	0.0763413	0.820194	0.922331	TMEM132A	transmembrane protein 132A
ENSG00000006125	-0.288996	0.11578	0.328271	AP2B1	adaptor related protein complex 2 subunit beta 1
ENSG00000006128	0.109842	0.806803	NA	TAC1	tachykinin precursor 1
ENSG00000006194	-0.38618	0.22469	0.482797	ZNF263	zinc finger protein 263
ENSG00000006210	-0.592332	0.0158418	0.101924	CX3CL1	C-X3-C motif chemokine ligand 1
ENSG00000006282	-0.0762035	0.755381	0.891197	SPATA20	spermatogenesis associated 20
ENSG00000006283	1.04057	0.0369255	0.16778	CACNA1G	calcium voltage-gated channel subunit alpha1 G
ENSG00000006327	0.0173264	0.970915	0.989086	TNFRSF12A	TNF receptor superfamily member 12A
ENSG00000006377	-0.335901	0.113303	0.324316	DLX6	distal-less homeobox 6
ENSG00000006432	0.445541	0.133813	0.359034	MAP3K9	mitogen-activated protein kinase kinase kinase 9
ENSG00000006451	-0.433159	0.0388878	0.173265	RALA	RAS like proto-oncogene A
ENSG00000006453	0.492251	0.190619	0.441014	BAIAP2L1	BAI1 associated protein 2 like 1
ENSG00000006459	-0.20599	0.438454	0.687596	KDM7A	lysine demethylase 7A
ENSG00000006468	0.135088	0.592765	0.796431	ETV1	ETS variant 1
ENSG00000006530	-0.219467	0.354044	0.613728	AGK	acylglycerol kinase
ENSG00000006534	0.509474	0.0450636	0.18922	ALDH3B1	aldehyde dehydrogenase 3 family member B1
ENSG00000006555	1.15113	0.00366413	0.0451496	TTC22	tetratricopeptide repeat domain 22
ENSG00000006576	-0.255423	0.348923	0.608814	PHTF2	putative homeodomain transcription factor 2
ENSG00000006607	0.193485	0.461688	0.706337	FARP2	FERM, ARH/RhoGEF and pleckstrin domain protein 2
ENSG00000006611	0.180819	0.600613	NA	USH1C	USH1 protein network component harmonin
ENSG00000006625	0.020988	0.935802	0.974625	GGCT	gamma-glutamylcyclotransferase
ENSG00000006634	0.674813	0.0756254	0.256814	DBF4	DBF4 zinc finger
ENSG00000006638	0.584874	0.0721998	0.249417	TBXA2R	thromboxane A2 receptor
ENSG00000006652	-0.0830721	0.776138	0.901783	IFRD1	interferon related developmental regulator 1
ENSG00000006659	0.902141	0.0697326	0.24482	LGALS14	galectin 14
ENSG00000006695	-0.188797	0.474172	0.71545	COX10	cytochrome c oxidase assembly factor heme A:farnesyltransferase COX10
ENSG00000006704	0.448246	0.0536094	0.209528	GTF2IRD1	GTF2I repeat domain containing 1
ENSG00000006712	-0.338729	0.102909	0.307123	PAF1	PAF1 homolog, Paf1/RNA polymerase II complex component
ENSG00000006715	0.326122	0.0766168	0.259071	VPS41	VPS41, HOPS complex subunit
ENSG00000006740	0.331931	0.19008	0.440319	ARHGAP44	Rho GTPase activating protein 44
ENSG00000006744	-0.285511	0.196513	0.449197	ELAC2	elaC ribonuclease Z 2
ENSG00000006747	-0.297371	0.183247	0.431592	SCIN	scinderin
ENSG00000006756	0.28099	0.311146	0.573072	ARSD	arylsulfatase D
ENSG00000006757	0.027184	0.915823	0.965921	PNPLA4	patatin like phospholipase domain containing 4
ENSG00000006788	-0.904951	0.00742361	0.0659956	MYH13	myosin heavy chain 13
ENSG00000006831	-0.480424	0.0734652	0.252048	ADIPOR2	adiponectin receptor 2
ENSG00000006837	0.60817	0.134905	0.360734	CDKL3	cyclin dependent kinase like 3
ENSG00000007001	0.487375	0.269216	NA	UPP2	uridine phosphorylase 2
ENSG00000007038	0.656618	0.159754	NA	PRSS21	serine protease 21
ENSG00000007047	-0.416104	0.0313951	0.152722	MARK4	microtubule affinity regulating kinase 4
ENSG00000007062	0.0854427	0.830184	0.926313	PROM1	prominin 1
ENSG00000007080	-0.153718	0.588906	0.7936	CCDC124	coiled-coil domain containing 124
ENSG00000007168	-0.149643	0.497698	0.73315	PAFAH1B1	platelet activating factor acetylhydrolase 1b regulatory subunit 1
ENSG00000007171	0.395148	0.420966	NA	NOS2	nitric oxide synthase 2
ENSG00000007174	1.32963	0.00347269	0.0439072	DNAH9	dynein axonemal heavy chain 9
ENSG00000007202	0.218099	0.540171	0.761593	KIAA0100	KIAA0100
ENSG00000007216	0.0579064	0.816136	NA	SLC13A2	solute carrier family 13 member 2
ENSG00000007237	-0.0271569	0.925116	0.969502	GAS7	growth arrest specific 7
ENSG00000007255	-0.305258	0.329802	0.591661	TRAPPC6A	trafficking protein particle complex 6A
ENSG00000007264	0.276337	0.564636	0.778683	MATK	megakaryocyte-associated tyrosine kinase
ENSG00000007306	0.0566168	0.820156	NA	CEACAM7	carcinoembryonic antigen related cell adhesion molecule 7
ENSG00000007312	-0.696679	0.166714	NA	CD79B	CD79b molecule
ENSG00000007314	0.0665942	0.858373	NA	SCN4A	sodium voltage-gated channel alpha subunit 4
ENSG00000007341	0.0280574	0.918439	0.966595	ST7L	suppression of tumorigenicity 7 like
ENSG00000007350	-1.16591	0.00241088	0.0358594	TKTL1	transketolase like 1
ENSG00000007372	-0.106494	0.740306	0.882799	PAX6	paired box 6
ENSG00000007376	-0.336928	0.418873	0.672086	RPUSD1	RNA pseudouridine synthase domain containing 1
ENSG00000007384	-0.442394	0.0473432	0.195069	RHBDF1	rhomboid 5 homolog 1
ENSG00000007392	-0.165675	0.503638	0.73787	LUC7L	LUC7 like
ENSG00000007402	-0.093399	0.842393	0.932998	CACNA2D2	calcium voltage-gated channel auxiliary subunit alpha2delta 2
ENSG00000007516	-0.463922	0.131024	0.353949	BAIAP3	BAI1 associated protein 3
ENSG00000007520	-0.425895	0.203532	0.457628	TSR3	TSR3, acp transferase ribosome maturation factor
ENSG00000007541	0.179719	0.681738	0.851368	PIGQ	phosphatidylinositol glycan anchor biosynthesis class Q
ENSG00000007545	-0.156653	0.607575	0.806948	CRAMP1	cramped chromatin regulator homolog 1
ENSG00000007866	-0.581951	0.0690107	0.243247	TEAD3	TEA domain transcription factor 3
ENSG00000007908	-0.898235	0.0778263	NA	SELE	selectin E
ENSG00000007923	-0.0845958	0.734819	0.879756	DNAJC11	DnaJ heat shock protein family (Hsp40) member C11
ENSG00000007933	1.25663	0.00233913	0.0350506	FMO3	flavin containing monooxygenase 3
ENSG00000007944	-0.298651	0.171036	0.415503	MYLIP	myosin regulatory light chain interacting protein
ENSG00000007952	0.0572757	0.90268	NA	NOX1	NADPH oxidase 1
ENSG00000007968	0.870867	0.0531541	0.208245	E2F2	E2F transcription factor 2
ENSG00000008018	-0.126949	0.537948	0.760333	PSMB1	proteasome subunit beta 1
ENSG00000008056	-0.586118	0.055862	0.215075	SYN1	synapsin I
ENSG00000008083	-0.361105	0.0947798	0.292987	JARID2	jumonji and AT-rich interaction domain containing 2
ENSG00000008086	0.721117	0.00208725	0.0328746	CDKL5	cyclin dependent kinase like 5
ENSG00000008118	0.0956294	0.720157	NA	CAMK1G	calcium/calmodulin dependent protein kinase IG
ENSG00000008128	0.148941	0.668636	0.844575	CDK11A	cyclin dependent kinase 11A
ENSG00000008130	-0.716214	0.00215468	0.0334293	NADK	NAD kinase
ENSG00000008196	-0.532924	0.291356	NA	TFAP2B	transcription factor AP-2 beta
ENSG00000008197	0.0547577	0.825961	NA	TFAP2D	transcription factor AP-2 delta
ENSG00000008226	-0.326366	0.262751	0.526451	DLEC1	DLEC1, cilia and flagella associated protein
ENSG00000008256	-0.321372	0.205918	0.460798	CYTH3	cytohesin 3
ENSG00000008277	0.589715	0.151014	0.386227	ADAM22	ADAM metallopeptidase domain 22
ENSG00000008282	-0.119585	0.65891	0.839506	SYPL1	synaptophysin like 1
ENSG00000008283	0.650868	0.032685	0.156324	CYB561	cytochrome b561
ENSG00000008294	-0.0485225	0.759235	0.893257	SPAG9	sperm associated antigen 9
ENSG00000008300	0.155478	0.70579	NA	CELSR3	cadherin EGF LAG seven-pass G-type receptor 3
ENSG00000008311	0.774358	0.001352	0.0257763	AASS	aminoadipate-semialdehyde synthase
ENSG00000008323	1.28153	0.0113921	0.085786	PLEKHG6	pleckstrin homology and RhoGEF domain containing G6
ENSG00000008324	0.21706	0.494187	0.73029	SS18L2	SS18 like 2
ENSG00000008382	-0.0365772	0.923326	0.968984	MPND	MPN domain containing
ENSG00000008394	-0.552505	0.212256	0.468601	MGST1	microsomal glutathione S-transferase 1
ENSG00000008405	-0.186704	0.542064	0.762931	CRY1	cryptochrome circadian regulator 1
ENSG00000008438	0.103329	0.778509	NA	PGLYRP1	peptidoglycan recognition protein 1
ENSG00000008441	-0.656599	0.0106921	0.0827332	NFIX	nuclear factor I X
ENSG00000008513	-0.788574	0.0051639	0.0548364	ST3GAL1	ST3 beta-galactoside alpha-2,3-sialyltransferase 1
ENSG00000008516	0.119947	0.678234	NA	MMP25	matrix metallopeptidase 25
ENSG00000008517	-0.739014	0.00383026	0.0462138	IL32	interleukin 32
ENSG00000008710	-0.119187	0.656631	0.838287	PKD1	polycystin 1, transient receptor potential channel interacting
ENSG00000008735	0.88577	0.0640242	0.233589	MAPK8IP2	mitogen-activated protein kinase 8 interacting protein 2
ENSG00000008838	-0.0401246	0.870115	0.944974	MED24	mediator complex subunit 24
ENSG00000008853	-0.373091	0.0859044	0.277205	RHOBTB2	Rho related BTB domain containing 2
ENSG00000008869	-0.451645	0.108748	0.316621	HEATR5B	HEAT repeat containing 5B
ENSG00000008952	-0.177148	0.304154	0.566353	SEC62	SEC62 homolog, preprotein translocation factor
ENSG00000008988	0.163889	0.684581	0.853091	RPS20	ribosomal protein S20
ENSG00000009307	-0.17904	0.268259	0.531535	CSDE1	cold shock domain containing E1
ENSG00000009335	-0.235116	0.308889	0.570859	UBE3C	ubiquitin protein ligase E3C
ENSG00000009413	0.0571607	0.733002	0.878763	REV3L	REV3 like, DNA directed polymerase zeta catalytic subunit
ENSG00000009694	0.253537	0.615737	NA	TENM1	teneurin transmembrane protein 1
ENSG00000009709	0	1	NA	PAX7	paired box 7
ENSG00000009724	0.590118	0.160485	0.400033	MASP2	mannan binding lectin serine peptidase 2
ENSG00000009765	1.02627	0.0151409	0.0997225	IYD	iodotyrosine deiodinase
ENSG00000009780	-0.256416	0.280803	0.543484	FAM76A	family with sequence similarity 76 member A
ENSG00000009790	1.6742	0.000871793	0.0202585	TRAF3IP3	TRAF3 interacting protein 3
ENSG00000009830	0.78152	0.00572263	0.0578267	POMT2	protein O-mannosyltransferase 2
ENSG00000009844	-0.307148	0.130679	0.353447	VTA1	vesicle trafficking 1
ENSG00000009950	0.605707	0.106637	0.313228	MLXIPL	MLX interacting protein like
ENSG00000009954	0.0335159	0.873238	0.946281	BAZ1B	bromodomain adjacent to zinc finger domain 1B
ENSG00000010017	-0.00905405	0.971223	0.989232	RANBP9	RAN binding protein 9
ENSG00000010030	0.134513	0.790603	NA	ETV7	ETS variant 7
ENSG00000010072	0.216084	0.547918	0.767397	SPRTN	SprT-like N-terminal domain
ENSG00000010165	0.0328852	0.905547	0.960928	EEF1AKNMT	eEF1A lysine and N-terminal methyltransferase
ENSG00000010219	-0.11197	0.625754	0.818987	DYRK4	dual specificity tyrosine phosphorylation regulated kinase 4
ENSG00000010244	0.0896348	0.548934	0.768093	ZNF207	zinc finger protein 207
ENSG00000010256	-0.383264	0.172674	0.417131	UQCRC1	ubiquinol-cytochrome c reductase core protein 1
ENSG00000010270	0.0362584	0.882373	0.949939	STARD3NL	STARD3 N-terminal like
ENSG00000010278	-0.523114	0.0356595	0.164271	CD9	CD9 molecule
ENSG00000010282	-0.361524	0.15682	0.394782	HHATL	hedgehog acyltransferase like
ENSG00000010292	0.574248	0.072756	0.25052	NCAPD2	non-SMC condensin I complex subunit D2
ENSG00000010295	0.293803	0.359396	0.619426	IFFO1	intermediate filament family orphan 1
ENSG00000010310	1.14943	0.002365	0.0353851	GIPR	gastric inhibitory polypeptide receptor
ENSG00000010318	0.395787	0.288202	0.551595	PHF7	PHD finger protein 7
ENSG00000010319	-0.263957	0.475568	0.716484	SEMA3G	semaphorin 3G
ENSG00000010322	0.181172	0.515603	0.746017	NISCH	nischarin
ENSG00000010327	-0.216641	0.464142	0.708261	STAB1	stabilin 1
ENSG00000010361	-0.616998	0.030521	0.150282	FUZ	fuzzy planar cell polarity protein
ENSG00000010379	-0.0472127	0.925789	NA	SLC6A13	solute carrier family 6 member 13
ENSG00000010404	0.0393164	0.838471	0.930972	IDS	iduronate 2-sulfatase
ENSG00000010539	0.95157	0.00369396	0.0453911	ZNF200	zinc finger protein 200
ENSG00000010610	-0.914305	0.0175883	0.108242	CD4	CD4 molecule
ENSG00000010626	-0.0941683	0.802573	0.914959	LRRC23	leucine rich repeat containing 23
ENSG00000010671	0.0554727	0.903186	NA	BTK	Bruton tyrosine kinase
ENSG00000010704	0.126843	0.651373	0.834651	HFE	homeostatic iron regulator
ENSG00000010803	-0.291088	0.148237	0.381687	SCMH1	Scm polycomb group protein homolog 1
ENSG00000010810	0.0971122	0.698698	0.860877	FYN	FYN proto-oncogene, Src family tyrosine kinase
ENSG00000010818	0.21952	0.355254	0.615036	HIVEP2	human immunodeficiency virus type I enhancer binding protein 2
ENSG00000010932	-0.54804	0.185184	0.434603	FMO1	flavin containing monooxygenase 1
ENSG00000011007	-0.513372	0.0382534	0.171395	ELOA	elongin A
ENSG00000011009	-0.662786	0.00452117	0.0505127	LYPLA2	lysophospholipase II
ENSG00000011021	-0.216648	0.212954	0.469527	CLCN6	chloride voltage-gated channel 6
ENSG00000011028	0.0604681	0.865139	0.942985	MRC2	mannose receptor C type 2
ENSG00000011052	0.161438	0.663506	0.841978	NME1-NME2	NME1-NME2 readthrough
ENSG00000011105	-0.41585	0.178562	0.425351	TSPAN9	tetraspanin 9
ENSG00000011114	0.419532	0.112754	0.323285	BTBD7	BTB domain containing 7
ENSG00000011132	0.637983	0.0331841	0.157575	APBA3	amyloid beta precursor protein binding family A member 3
ENSG00000011143	-0.678538	0.0825867	0.270513	MKS1	Meckel syndrome, type 1
ENSG00000011198	0.105822	0.775573	0.901492	ABHD5	abhydrolase domain containing 5
ENSG00000011201	-0.316286	0.300054	0.563016	ANOS1	anosmin 1
ENSG00000011243	-0.153084	0.711411	0.866453	AKAP8L	A-kinase anchoring protein 8 like
ENSG00000011258	0.238802	0.445725	0.693558	MBTD1	mbt domain containing 1
ENSG00000011260	-0.669241	0.0135468	0.0940805	UTP18	UTP18, small subunit processome component
ENSG00000011275	-0.261111	0.300132	0.563033	RNF216	ring finger protein 216
ENSG00000011295	-0.0227588	0.8744	0.946754	TTC19	tetratricopeptide repeat domain 19
ENSG00000011304	-0.799571	2.89986e-05	0.00271219	PTBP1	polypyrimidine tract binding protein 1
ENSG00000011332	0.617055	0.168954	0.412279	DPF1	double PHD fingers 1
ENSG00000011347	-0.564904	0.0394535	0.174901	SYT7	synaptotagmin 7
ENSG00000011376	-0.0055305	0.987767	0.996433	LARS2	leucyl-tRNA synthetase 2, mitochondrial
ENSG00000011405	-0.196817	0.255549	0.51796	PIK3C2A	phosphatidylinositol-4-phosphate 3-kinase catalytic subunit type 2 alpha
ENSG00000011422	-0.564893	0.178474	0.425247	PLAUR	plasminogen activator, urokinase receptor
ENSG00000011426	1.11681	0.0231219	0.127073	ANLN	anillin actin binding protein
ENSG00000011451	-0.330359	0.167505	0.410385	WIZ	widely interspaced zinc finger motifs
ENSG00000011454	0.173795	0.484626	0.72365	GPR21	G protein-coupled receptor 21
ENSG00000011465	-0.450468	0.206704	0.461671	DCN	decorin
ENSG00000011478	1.16941	0.000875123	0.0202722	QPCTL	glutaminyl-peptide cyclotransferase like
ENSG00000011485	-0.443284	0.121078	0.337209	PPP5C	protein phosphatase 5 catalytic subunit
ENSG00000011523	-0.0156538	0.936896	0.975154	CEP68	centrosomal protein 68
ENSG00000011566	-0.0910182	0.752242	0.889812	MAP4K3	mitogen-activated protein kinase kinase kinase kinase 3
ENSG00000011590	0.0579048	0.816141	NA	ZBTB32	zinc finger and BTB domain containing 32
ENSG00000011600	-0.220472	0.606673	0.806535	TYROBP	TYRO protein tyrosine kinase binding protein
ENSG00000011638	-0.416384	0.0675615	0.240508	TMEM159	transmembrane protein 159
ENSG00000011677	0.416358	0.410965	NA	GABRA3	gamma-aminobutyric acid type A receptor alpha3 subunit
ENSG00000012048	0.221243	0.291908	0.555719	BRCA1	BRCA1, DNA repair associated
ENSG00000012061	-0.358264	0.224261	0.482107	ERCC1	ERCC excision repair 1, endonuclease non-catalytic subunit
ENSG00000012124	0.732267	0.130992	0.353949	CD22	CD22 molecule
ENSG00000012171	0.260566	0.442823	0.691178	SEMA3B	semaphorin 3B
ENSG00000012174	0.14295	0.611329	0.809452	MBTPS2	membrane bound transcription factor peptidase, site 2
ENSG00000012211	0.608373	0.231137	NA	PRICKLE3	prickle planar cell polarity protein 3
ENSG00000012223	-1.20783	0.00386607	0.0464766	LTF	lactotransferrin
ENSG00000012232	-0.264149	0.264583	0.528165	EXTL3	exostosin like glycosyltransferase 3
ENSG00000012504	0.0651389	0.79368	NA	NR1H4	nuclear receptor subfamily 1 group H member 4
ENSG00000012660	-0.239084	0.432366	0.682972	ELOVL5	ELOVL fatty acid elongase 5
ENSG00000012779	-0.721615	0.156382	NA	ALOX5	arachidonate 5-lipoxygenase
ENSG00000012817	0.438097	0.36166	0.621149	KDM5D	lysine demethylase 5D
ENSG00000012822	-0.611417	0.000340623	0.0117927	CALCOCO1	calcium binding and coiled-coil domain 1
ENSG00000012963	0.140521	0.692321	0.857625	UBR7	ubiquitin protein ligase E3 component n-recognin 7 (putative)
ENSG00000012983	-0.189863	0.47387	0.715093	MAP4K5	mitogen-activated protein kinase kinase kinase kinase 5
ENSG00000013016	0.0383318	0.884114	0.950824	EHD3	EH domain containing 3
ENSG00000013275	-0.64085	0.0110698	0.0841881	PSMC4	proteasome 26S subunit, ATPase 4
ENSG00000013288	0.408173	0.0641041	0.233762	MAN2B2	mannosidase alpha class 2B member 2
ENSG00000013293	1.21355	0.00107929	0.0228546	SLC7A14	solute carrier family 7 member 14
ENSG00000013297	-0.155171	0.56212	0.7769	CLDN11	claudin 11
ENSG00000013306	-0.276727	0.0630213	0.231514	SLC25A39	solute carrier family 25 member 39
ENSG00000013364	-0.0742031	0.714965	0.868494	MVP	major vault protein
ENSG00000013374	-0.0491867	0.807262	0.917218	NUB1	negative regulator of ubiquitin like proteins 1
ENSG00000013375	0.129274	0.619399	0.814761	PGM3	phosphoglucomutase 3
ENSG00000013392	0.500954	0.120869	0.336806	RWDD2A	RWD domain containing 2A
ENSG00000013441	0.383927	0.179959	0.42738	CLK1	CDC like kinase 1
ENSG00000013503	-0.529495	0.118094	0.332196	POLR3B	RNA polymerase III subunit B
ENSG00000013523	0.372959	0.208203	0.463878	ANGEL1	angel homolog 1
ENSG00000013561	0.189891	0.378642	0.63646	RNF14	ring finger protein 14
ENSG00000013563	-0.627369	0.015806	0.101846	DNASE1L1	deoxyribonuclease 1 like 1
ENSG00000013573	0.513949	0.220668	0.478649	DDX11	DEAD/H-box helicase 11
ENSG00000013583	-0.176248	0.378754	0.636476	HEBP1	heme binding protein 1
ENSG00000013588	0.702653	0.0520843	0.206661	GPRC5A	G protein-coupled receptor class C group 5 member A
ENSG00000013619	-0.407158	0.349295	0.609151	MAMLD1	mastermind like domain containing 1
ENSG00000013725	1.70635	0.000810525	0.0194616	CD6	CD6 molecule
ENSG00000013810	-0.192539	0.612814	0.810639	TACC3	transforming acidic coiled-coil containing protein 3
ENSG00000014123	-0.252541	0.220419	0.478484	UFL1	UFM1 specific ligase 1
ENSG00000014138	0.820268	0.031569	0.153108	POLA2	DNA polymerase alpha 2, accessory subunit
ENSG00000014164	-0.577014	0.143813	0.374105	ZC3H3	zinc finger CCCH-type containing 3
ENSG00000014216	-0.0767394	0.829382	0.92607	CAPN1	calpain 1
ENSG00000014257	0.801066	0.0935518	0.290689	ACPP	acid phosphatase, prostate
ENSG00000014641	0.100372	0.696402	0.859159	MDH1	malate dehydrogenase 1
ENSG00000014824	-0.143166	0.471786	0.71345	SLC30A9	solute carrier family 30 member 9
ENSG00000014914	-0.167805	0.688367	0.85561	MTMR11	myotubularin related protein 11
ENSG00000014919	0.173153	0.466795	0.709966	COX15	cytochrome c oxidase assembly homolog COX15
ENSG00000015133	-0.00105466	0.997511	0.999264	CCDC88C	coiled-coil domain containing 88C
ENSG00000015153	0.129222	0.503824	0.737913	YAF2	YY1 associated factor 2
ENSG00000015171	-0.163691	0.455005	0.700832	ZMYND11	zinc finger MYND-type containing 11
ENSG00000015285	-1.55008	7.71973e-05	0.0050113	WAS	Wiskott-Aldrich syndrome
ENSG00000015413	0.0566168	0.820156	NA	DPEP1	dipeptidase 1
ENSG00000015475	-0.000916245	0.997424	0.999264	BID	BH3 interacting domain death agonist
ENSG00000015479	-0.0879308	0.549353	0.768531	MATR3	matrin 3
ENSG00000015520	1.02207	0.0434059	0.184727	NPC1L1	NPC1 like intracellular cholesterol transporter 1
ENSG00000015532	0.231128	0.356414	0.616085	XYLT2	xylosyltransferase 2
ENSG00000015568	0.335252	0.249892	0.511612	RGPD5	RANBP2-like and GRIP domain containing 5
ENSG00000015592	0.0721276	0.772146	NA	STMN4	stathmin 4
ENSG00000015676	-0.624665	0.000984237	0.0217986	NUDCD3	NudC domain containing 3
ENSG00000016082	0.368629	0.435465	NA	ISL1	ISL LIM homeobox 1
ENSG00000016391	-0.157759	0.499344	0.734612	CHDH	choline dehydrogenase
ENSG00000016402	-0.836424	0.0818319	0.26898	IL20RA	interleukin 20 receptor subunit alpha
ENSG00000016490	0.0667485	0.788706	NA	CLCA1	chloride channel accessory 1
ENSG00000016602	0.156991	0.624933	NA	CLCA4	chloride channel accessory 4
ENSG00000016864	0.0246381	0.903737	0.960018	GLT8D1	glycosyltransferase 8 domain containing 1
ENSG00000017260	-0.0403922	0.850398	0.936283	ATP2C1	ATPase secretory pathway Ca2+ transporting 1
ENSG00000017427	0.315666	0.292887	0.556294	IGF1	insulin like growth factor 1
ENSG00000017483	0.216692	0.613027	NA	SLC38A5	solute carrier family 38 member 5
ENSG00000017797	-0.0502598	0.741845	0.883629	RALBP1	ralA binding protein 1
ENSG00000018189	0.361664	0.0970203	0.296771	RUFY3	RUN and FYVE domain containing 3
ENSG00000018236	0.766581	0.122978	0.339995	CNTN1	contactin 1
ENSG00000018280	0.848552	0.00638509	0.0607103	SLC11A1	solute carrier family 11 member 1
ENSG00000018408	-0.172701	0.32933	0.591329	WWTR1	WW domain containing transcription regulator 1
ENSG00000018510	-0.114191	0.679198	0.850377	AGPS	alkylglycerone phosphate synthase
ENSG00000018610	0.316396	0.19299	0.444371	CXorf56	chromosome X open reading frame 56
ENSG00000018625	0.152131	0.610497	0.808929	ATP1A2	ATPase Na+/K+ transporting subunit alpha 2
ENSG00000018699	0.104685	0.782248	0.904525	TTC27	tetratricopeptide repeat domain 27
ENSG00000018869	0.306592	0.445134	0.693013	ZNF582	zinc finger protein 582
ENSG00000019102	-0.173231	0.718847	NA	VSIG2	V-set and immunoglobulin domain containing 2
ENSG00000019144	0.0920841	0.713107	0.867423	PHLDB1	pleckstrin homology like domain family B member 1
ENSG00000019169	0.171538	0.668918	NA	MARCO	macrophage receptor with collagenous structure
ENSG00000019186	0.0566168	0.820156	NA	CYP24A1	cytochrome P450 family 24 subfamily A member 1
ENSG00000019485	-0.480092	0.032559	0.15589	PRDM11	PR/SET domain 11
ENSG00000019505	-0.433882	0.299035	0.562149	SYT13	synaptotagmin 13
ENSG00000019549	-1.04079	0.00713037	0.0647452	SNAI2	snail family transcriptional repressor 2
ENSG00000019582	-1.00584	1.49313e-05	0.00173112	CD74	CD74 molecule
ENSG00000019991	-0.701565	0.122034	0.338946	HGF	hepatocyte growth factor
ENSG00000019995	-0.0658339	0.759341	0.893257	ZRANB1	zinc finger RANBP2-type containing 1
ENSG00000020129	-0.0858138	0.694087	0.858257	NCDN	neurochondrin
ENSG00000020181	-0.380202	0.168191	0.411702	ADGRA2	adhesion G protein-coupled receptor A2
ENSG00000020256	0.26723	0.236867	0.497402	ZFP64	ZFP64 zinc finger protein
ENSG00000020426	0.320158	0.306658	0.568582	MNAT1	MNAT1, CDK activating kinase assembly factor
ENSG00000020577	0.257198	0.222939	0.481284	SAMD4A	sterile alpha motif domain containing 4A
ENSG00000020633	-0.729616	0.0419149	0.181356	RUNX3	runt related transcription factor 3
ENSG00000020922	0.437742	0.0694954	0.244374	MRE11	MRE11 homolog, double strand break repair nuclease
ENSG00000021300	-0.401488	0.278665	0.541582	PLEKHB1	pleckstrin homology domain containing B1
ENSG00000021355	-0.114877	0.622418	0.816849	SERPINB1	serpin family B member 1
ENSG00000021461	1.38144	9.91706e-05	0.00593206	CYP3A43	cytochrome P450 family 3 subfamily A member 43
ENSG00000021488	0.303086	0.430848	0.682269	SLC7A9	solute carrier family 7 member 9
ENSG00000021574	0.101537	0.636554	0.825044	SPAST	spastin
ENSG00000021645	0.783497	0.0260357	0.136656	NRXN3	neurexin 3
ENSG00000021762	-0.793506	0.0151854	0.0998796	OSBPL5	oxysterol binding protein like 5
ENSG00000021776	0.229343	0.333982	0.595913	AQR	aquarius intron-binding spliceosomal factor
ENSG00000021826	0.340709	0.347845	0.607968	CPS1	carbamoyl-phosphate synthase 1
ENSG00000022267	-0.0261699	0.93973	0.97619	FHL1	four and a half LIM domains 1
ENSG00000022277	-0.310691	0.20853	0.464022	RTF2	replication termination factor 2
ENSG00000022355	0.346948	0.495334	0.731222	GABRA1	gamma-aminobutyric acid type A receptor alpha1 subunit
ENSG00000022556	1.54167	0.00164788	0.0290156	NLRP2	NLR family pyrin domain containing 2
ENSG00000022567	-0.0685694	0.829896	0.926277	SLC45A4	solute carrier family 45 member 4
ENSG00000022840	-0.670181	2.28858e-05	0.00234047	RNF10	ring finger protein 10
ENSG00000022976	0.567852	0.07757	0.260894	ZNF839	zinc finger protein 839
ENSG00000023041	-0.0101934	0.968244	0.988421	ZDHHC6	zinc finger DHHC-type containing 6
ENSG00000023171	0.288128	0.381872	0.639391	GRAMD1B	GRAM domain containing 1B
ENSG00000023191	-0.592309	0.0228379	0.126366	RNH1	ribonuclease/angiogenin inhibitor 1
ENSG00000023228	-0.0600586	0.815993	0.921097	NDUFS1	NADH:ubiquinone oxidoreductase core subunit S1
ENSG00000023287	0.00808375	0.976251	0.991504	RB1CC1	RB1 inducible coiled-coil 1
ENSG00000023318	-0.204479	0.390482	0.64736	ERP44	endoplasmic reticulum protein 44
ENSG00000023330	-0.550216	0.0136088	0.0942005	ALAS1	5'-aminolevulinate synthase 1
ENSG00000023445	-0.48111	0.00824642	0.0703689	BIRC3	baculoviral IAP repeat containing 3
ENSG00000023516	-0.0306563	0.899533	0.957156	AKAP11	A-kinase anchoring protein 11
ENSG00000023572	-0.722846	0.00832864	0.0707074	GLRX2	glutaredoxin 2
ENSG00000023608	0.237422	0.386251	0.643374	SNAPC1	small nuclear RNA activating complex polypeptide 1
ENSG00000023697	0.125428	0.672669	0.846587	DERA	deoxyribose-phosphate aldolase
ENSG00000023734	-0.275679	0.30646	0.568357	STRAP	serine/threonine kinase receptor associated protein
ENSG00000023839	0.303572	0.548902	0.768093	ABCC2	ATP binding cassette subfamily C member 2
ENSG00000023892	-0.202014	0.690631	NA	DEF6	DEF6, guanine nucleotide exchange factor
ENSG00000023902	-0.449672	0.171236	0.415763	PLEKHO1	pleckstrin homology domain containing O1
ENSG00000023909	0.564781	0.00734657	0.0656341	GCLM	glutamate-cysteine ligase modifier subunit
ENSG00000024048	0.318928	0.139022	0.367589	UBR2	ubiquitin protein ligase E3 component n-recognin 2
ENSG00000024422	-0.875479	0.00173867	0.029841	EHD2	EH domain containing 2
ENSG00000024526	0.38	0.434964	0.684833	DEPDC1	DEP domain containing 1
ENSG00000024862	-0.156944	0.38922	0.646126	CCDC28A	coiled-coil domain containing 28A
ENSG00000025039	-0.389334	0.126413	0.346127	RRAGD	Ras related GTP binding D
ENSG00000025156	0.0239085	0.918201	0.966595	HSF2	heat shock transcription factor 2
ENSG00000025293	0.143659	0.514204	0.745301	PHF20	PHD finger protein 20
ENSG00000025423	0.0591064	0.812399	NA	HSD17B6	hydroxysteroid 17-beta dehydrogenase 6
ENSG00000025434	-0.336556	0.461344	0.706079	NR1H3	nuclear receptor subfamily 1 group H member 3
ENSG00000025708	-0.376455	0.332707	0.594479	TYMP	thymidine phosphorylase
ENSG00000025770	-0.226974	0.514295	0.745301	NCAPH2	non-SMC condensin II complex subunit H2
ENSG00000025772	-0.653917	0.0347036	0.161598	TOMM34	translocase of outer mitochondrial membrane 34
ENSG00000025796	-0.116051	0.485796	0.724077	SEC63	SEC63 homolog, protein translocation regulator
ENSG00000025800	-0.11829	0.571779	0.782687	KPNA6	karyopherin subunit alpha 6
ENSG00000026025	-0.113183	0.724831	0.874209	VIM	vimentin
ENSG00000026036	-0.570613	0.191811	0.442849	RTEL1-TNFRSF6B	RTEL1-TNFRSF6B readthrough (NMD candidate)
ENSG00000026103	-0.178804	0.668751	0.844575	FAS	Fas cell surface death receptor
ENSG00000026297	-0.477127	0.0514056	0.204847	RNASET2	ribonuclease T2
ENSG00000026508	0.00715146	0.982492	0.994151	CD44	CD44 molecule (Indian blood group)
ENSG00000026559	0.739133	0.0887456	0.282641	KCNG1	potassium voltage-gated channel modifier subfamily G member 1
ENSG00000026652	0.29167	0.486094	0.724279	AGPAT4	1-acylglycerol-3-phosphate O-acyltransferase 4
ENSG00000026751	1.7206	6.19621e-05	0.00446449	SLAMF7	SLAM family member 7
ENSG00000026950	-0.28679	0.342416	0.602949	BTN3A1	butyrophilin subfamily 3 member A1
ENSG00000027001	-0.36744	0.335105	0.597045	MIPEP	mitochondrial intermediate peptidase
ENSG00000027075	-0.514246	0.0404962	0.177745	PRKCH	protein kinase C eta
ENSG00000027644	0.0372132	0.894644	NA	INSRR	insulin receptor related receptor
ENSG00000027697	-0.356072	0.164828	0.406473	IFNGR1	interferon gamma receptor 1
ENSG00000027847	-0.591018	0.0531432	0.208245	B4GALT7	beta-1,4-galactosyltransferase 7
ENSG00000027869	-0.461504	0.340762	0.601463	SH2D2A	SH2 domain containing 2A
ENSG00000028116	-0.428992	0.0600379	0.225052	VRK2	VRK serine/threonine kinase 2
ENSG00000028137	-0.481217	0.0627561	0.231117	TNFRSF1B	TNF receptor superfamily member 1B
ENSG00000028203	0.137518	0.445354	0.693176	VEZT	vezatin, adherens junctions transmembrane protein
ENSG00000028277	-0.970896	0.00296988	0.0402004	POU2F2	POU class 2 homeobox 2
ENSG00000028310	-0.228238	0.500168	0.735081	BRD9	bromodomain containing 9
ENSG00000028528	-0.1289	0.53197	0.757102	SNX1	sorting nexin 1
ENSG00000028839	-0.0320454	0.918439	0.966595	TBPL1	TATA-box binding protein like 1
ENSG00000029153	1.31036	8.23628e-05	0.00523723	ARNTL2	aryl hydrocarbon receptor nuclear translocator like 2
ENSG00000029363	0.031861	0.884374	0.950866	BCLAF1	BCL2 associated transcription factor 1
ENSG00000029364	-0.420978	0.0907574	0.286007	SLC39A9	solute carrier family 39 member 9
ENSG00000029534	-0.365682	0.181151	0.42872	ANK1	ankyrin 1
ENSG00000029559	0.0157317	0.94964	NA	IBSP	integrin binding sialoprotein
ENSG00000029639	-0.0447291	0.889823	0.953176	TFB1M	transcription factor B1, mitochondrial
ENSG00000029725	0.113653	0.577408	0.786007	RABEP1	rabaptin, RAB GTPase binding effector protein 1
ENSG00000029993	-0.0740012	0.860358	0.940916	HMGB3	high mobility group box 3
ENSG00000030066	0.303796	0.261136	0.524351	NUP160	nucleoporin 160
ENSG00000030110	-0.640956	0.13338	0.358219	BAK1	BCL2 antagonist/killer 1
ENSG00000030304	-0.251328	0.619689	NA	MUSK	muscle associated receptor tyrosine kinase
ENSG00000030419	-0.107967	0.784227	0.905667	IKZF2	IKAROS family zinc finger 2
ENSG00000030582	-0.683079	0.00078285	0.0192392	GRN	granulin precursor
ENSG00000031003	0.0873245	0.707007	0.864289	FAM13B	family with sequence similarity 13 member B
ENSG00000031081	-0.822026	3.098e-07	0.000114585	ARHGAP31	Rho GTPase activating protein 31
ENSG00000031691	0.224619	0.620423	0.815362	CENPQ	centromere protein Q
ENSG00000031698	-0.289838	0.200784	0.454303	SARS	seryl-tRNA synthetase
ENSG00000031823	-0.521892	0.00680327	0.0631443	RANBP3	RAN binding protein 3
ENSG00000032219	0.281934	0.182888	0.43125	ARID4A	AT-rich interaction domain 4A
ENSG00000032389	-0.33388	0.355022	0.614846	EIPR1	EARP complex and GARP complex interacting protein 1
ENSG00000032444	-0.254613	0.473821	0.715093	PNPLA6	patatin like phospholipase domain containing 6
ENSG00000032742	0.275205	0.413928	0.667482	IFT88	intraflagellar transport 88
ENSG00000033011	1.106	0.00427632	0.0488169	ALG1	ALG1, chitobiosyldiphosphodolichol beta-mannosyltransferase
ENSG00000033030	0.491913	0.0933165	0.290446	ZCCHC8	zinc finger CCHC-type containing 8
ENSG00000033050	-0.434247	0.0520613	0.206607	ABCF2	ATP binding cassette subfamily F member 2
ENSG00000033100	0.0918831	0.812213	0.919344	CHPF2	chondroitin polymerizing factor 2
ENSG00000033122	-0.0213608	0.964657	0.987068	LRRC7	leucine rich repeat containing 7
ENSG00000033170	0.856828	0.00354591	0.0443829	FUT8	fucosyltransferase 8
ENSG00000033178	0.053082	0.83069	0.926552	UBA6	ubiquitin like modifier activating enzyme 6
ENSG00000033327	0.429074	0.127487	0.348073	GAB2	GRB2 associated binding protein 2
ENSG00000033627	0.395471	0.155049	0.392488	ATP6V0A1	ATPase H+ transporting V0 subunit a1
ENSG00000033800	-0.128361	0.567907	0.780367	PIAS1	protein inhibitor of activated STAT 1
ENSG00000033867	-0.354216	0.239598	0.500378	SLC4A7	solute carrier family 4 member 7
ENSG00000034053	0.415725	0.384261	0.641505	APBA2	amyloid beta precursor protein binding family A member 2
ENSG00000034152	-0.749758	0.0203334	0.118033	MAP2K3	mitogen-activated protein kinase kinase 3
ENSG00000034239	0.0669144	0.788194	NA	EFCAB1	EF-hand calcium binding domain 1
ENSG00000034510	-0.801135	0.000745577	0.0187193	TMSB10	thymosin beta 10
ENSG00000034533	0.0111502	0.975284	0.991044	ASTE1	asteroid homolog 1
ENSG00000034677	-0.302206	0.154214	0.3913	RNF19A	ring finger protein 19A, RBR E3 ubiquitin protein ligase
ENSG00000034693	0.136055	0.608985	0.807962	PEX3	peroxisomal biogenesis factor 3
ENSG00000034713	0.0993369	0.629542	0.821136	GABARAPL2	GABA type A receptor associated protein like 2
ENSG00000034971	0.239057	0.624533	0.818209	MYOC	myocilin
ENSG00000035115	0.91179	0.00305925	0.0408244	SH3YL1	SH3 and SYLF domain containing 1
ENSG00000035141	-0.178839	0.418198	0.671538	FAM136A	family with sequence similarity 136 member A
ENSG00000035403	-0.0610705	0.819525	0.922092	VCL	vinculin
ENSG00000035499	0.805336	0.0944707	NA	DEPDC1B	DEP domain containing 1B
ENSG00000035664	0.478234	0.0487829	0.197986	DAPK2	death associated protein kinase 2
ENSG00000035681	-0.364657	0.23478	0.494753	NSMAF	neutral sphingomyelinase activation associated factor
ENSG00000035687	-0.258454	0.386057	0.643244	ADSS	adenylosuccinate synthase
ENSG00000035720	0.032464	0.909443	NA	STAP1	signal transducing adaptor family member 1
ENSG00000035862	-0.337831	0.168532	0.411987	TIMP2	TIMP metallopeptidase inhibitor 2
ENSG00000035928	-0.0684796	0.797156	0.912446	RFC1	replication factor C subunit 1
ENSG00000036054	-0.327625	0.0926311	0.289327	TBC1D23	TBC1 domain family member 23
ENSG00000036257	-0.0173826	0.948013	0.980117	CUL3	cullin 3
ENSG00000036448	-0.3916	0.184375	0.433391	MYOM2	myomesin 2
ENSG00000036473	0.0754638	0.761927	NA	OTC	ornithine carbamoyltransferase
ENSG00000036530	1.16776	2.47626e-05	0.00245951	CYP46A1	cytochrome P450 family 46 subfamily A member 1
ENSG00000036549	0.485752	0.0195819	0.115148	ZZZ3	zinc finger ZZ-type containing 3
ENSG00000036565	0.614678	0.211423	NA	SLC18A1	solute carrier family 18 member A1
ENSG00000036672	-0.78006	0.00123015	0.0248458	USP2	ubiquitin specific peptidase 2
ENSG00000036828	0.0157317	0.94964	NA	CASR	calcium sensing receptor
ENSG00000037042	-0.196487	0.378534	0.636453	TUBG2	tubulin gamma 2
ENSG00000037241	0.258761	0.433768	0.683841	RPL26L1	ribosomal protein L26 like 1
ENSG00000037280	-0.752887	0.0775074	0.260771	FLT4	fms related tyrosine kinase 4
ENSG00000037474	-0.254451	0.25614	0.518684	NSUN2	NOP2/Sun RNA methyltransferase family member 2
ENSG00000037637	-0.354897	0.042531	0.182881	FBXO42	F-box protein 42
ENSG00000037749	0.591661	0.240572	0.501168	MFAP3	microfibril associated protein 3
ENSG00000037757	1.23285	3.19111e-05	0.00286709	MRI1	methylthioribose-1-phosphate isomerase 1
ENSG00000037897	-0.00166589	0.997176	0.999263	METTL1	methyltransferase like 1
ENSG00000037965	0.250469	0.622858	NA	HOXC8	homeobox C8
ENSG00000038002	0.0439248	0.884982	0.951021	AGA	aspartylglucosaminidase
ENSG00000038210	0.462993	0.264611	0.528165	PI4K2B	phosphatidylinositol 4-kinase type 2 beta
ENSG00000038219	0.503775	0.0637809	0.23303	BOD1L1	biorientation of chromosomes in cell division 1 like 1
ENSG00000038274	-0.274067	0.123189	0.340207	MAT2B	methionine adenosyltransferase 2B
ENSG00000038295	-0.00570668	0.991043	0.997426	TLL1	tolloid like 1
ENSG00000038358	-0.323103	0.264381	0.527932	EDC4	enhancer of mRNA decapping 4
ENSG00000038382	-0.580939	0.00468985	0.0516273	TRIO	trio Rho guanine nucleotide exchange factor
ENSG00000038427	-0.0247271	0.925212	0.969557	VCAN	versican
ENSG00000038532	-0.00335663	0.989802	0.997146	CLEC16A	C-type lectin domain containing 16A
ENSG00000038945	-0.640491	0.00382222	0.0461774	MSR1	macrophage scavenger receptor 1
ENSG00000039068	0.877882	0.0265635	0.138217	CDH1	cadherin 1
ENSG00000039123	-0.351951	0.1056	0.311631	MTREX	Mtr4 exosome RNA helicase
ENSG00000039139	0.417033	0.412614	NA	DNAH5	dynein axonemal heavy chain 5
ENSG00000039319	0.281481	0.0537091	0.209881	ZFYVE16	zinc finger FYVE-type containing 16
ENSG00000039523	-0.69573	1.23381e-05	0.00154693	RIPOR1	RHO family interacting cell polarization regulator 1
ENSG00000039537	-0.421669	0.348546	0.608618	C6	complement C6
ENSG00000039560	0.390552	0.263623	0.527245	RAI14	retinoic acid induced 14
ENSG00000039600	-0.114825	0.779489	NA	SOX30	SRY-box 30
ENSG00000039650	-0.0057072	0.986769	0.996175	PNKP	polynucleotide kinase 3'-phosphatase
ENSG00000039987	1.06285	0.0257854	0.135792	BEST2	bestrophin 2
ENSG00000040199	0.691946	0.0206042	0.118893	PHLPP2	PH domain and leucine rich repeat protein phosphatase 2
ENSG00000040275	0.404787	0.325256	0.587123	SPDL1	spindle apparatus coiled-coil protein 1
ENSG00000040341	-0.505566	0.0114776	0.086149	STAU2	staufen double-stranded RNA binding protein 2
ENSG00000040487	0.893413	0.0086206	0.0722048	PQLC2	PQ loop repeat containing 2
ENSG00000040531	0.654132	0.151556	0.38708	CTNS	cystinosin, lysosomal cystine transporter
ENSG00000040608	0.0588926	0.907957	NA	RTN4R	reticulon 4 receptor
ENSG00000040633	-0.0321013	0.909743	0.963354	PHF23	PHD finger protein 23
ENSG00000040731	0.101651	0.819993	NA	CDH10	cadherin 10
ENSG00000040933	-0.173469	0.467039	0.709974	INPP4A	inositol polyphosphate-4-phosphatase type I A
ENSG00000041353	0.245623	0.553444	NA	RAB27B	RAB27B, member RAS oncogene family
ENSG00000041357	-0.172754	0.352361	0.612165	PSMA4	proteasome subunit alpha 4
ENSG00000041515	-0.0149099	0.970866	0.989086	MYO16	myosin XVI
ENSG00000041802	-0.372352	0.133846	0.35908	LSG1	large 60S subunit nuclear export GTPase 1
ENSG00000041880	0.0816827	0.745233	0.88557	PARP3	poly(ADP-ribose) polymerase family member 3
ENSG00000041982	-0.546151	0.156852	0.394782	TNC	tenascin C
ENSG00000041988	-0.185421	0.595129	0.797759	THAP3	THAP domain containing 3
ENSG00000042062	-0.811975	0.00769925	0.0674809	RIPOR3	RIPOR family member 3
ENSG00000042088	0.515811	0.176201	0.422302	TDP1	tyrosyl-DNA phosphodiesterase 1
ENSG00000042286	-0.308068	0.192366	0.443334	AIFM2	apoptosis inducing factor, mitochondria associated 2
ENSG00000042304	0.627826	0.153233	0.389657	C2orf83	chromosome 2 open reading frame 83
ENSG00000042317	0.476286	0.0983654	0.2994	SPATA7	spermatogenesis associated 7
ENSG00000042429	0.708503	0.00182867	0.0306047	MED17	mediator complex subunit 17
ENSG00000042445	-0.193147	0.556895	0.7732	RETSAT	retinol saturase
ENSG00000042493	0.629222	0.215571	NA	CAPG	capping actin protein, gelsolin like
ENSG00000042753	-0.35745	0.229562	0.488946	AP2S1	adaptor related protein complex 2 subunit sigma 1
ENSG00000042781	0.300225	0.524124	0.751686	USH2A	usherin
ENSG00000042813	0.108543	0.765446	NA	ZPBP	zona pellucida binding protein
ENSG00000042832	0.201653	0.632621	NA	TG	thyroglobulin
ENSG00000042980	0.432945	0.370811	0.629227	ADAM28	ADAM metallopeptidase domain 28
ENSG00000043039	1.22559	0.00687381	0.0635598	BARX2	BARX homeobox 2
ENSG00000043093	-0.118464	0.447961	0.695574	DCUN1D1	defective in cullin neddylation 1 domain containing 1
ENSG00000043143	-0.18502	0.532437	0.75762	JADE2	jade family PHD finger 2
ENSG00000043355	-0.167786	0.725431	NA	ZIC2	Zic family member 2
ENSG00000043462	-1.29075	0.00138554	0.0261907	LCP2	lymphocyte cytosolic protein 2
ENSG00000043514	0.520199	0.128178	0.349079	TRIT1	tRNA isopentenyltransferase 1
ENSG00000043591	-0.636719	0.000102037	0.00600636	ADRB1	adrenoceptor beta 1
ENSG00000044012	0.0547577	0.825961	NA	GUCA2B	guanylate cyclase activator 2B
ENSG00000044090	-0.882153	0.0208023	0.119566	CUL7	cullin 7
ENSG00000044115	-0.320515	0.206179	0.461149	CTNNA1	catenin alpha 1
ENSG00000044446	-0.0254334	0.942357	0.97714	PHKA2	phosphorylase kinase regulatory subunit alpha 2
ENSG00000044459	-0.0773695	0.780325	0.903646	CNTLN	centlein
ENSG00000044524	-0.0197056	0.955551	0.98347	EPHA3	EPH receptor A3
ENSG00000044574	-0.207116	0.390067	0.646867	HSPA5	heat shock protein family A (Hsp70) member 5
ENSG00000046604	0.158459	0.538915	0.760789	DSG2	desmoglein 2
ENSG00000046647	0.663102	0.0855976	0.276665	GEMIN8	gem nuclear organelle associated protein 8
ENSG00000046651	-0.0379991	0.893111	0.954503	OFD1	OFD1, centriole and centriolar satellite protein
ENSG00000046653	-0.277877	0.2968	0.559941	GPM6B	glycoprotein M6B
ENSG00000046774	0.00271248	0.99131	NA	MAGEC2	MAGE family member C2
ENSG00000046889	-0.472125	0.0753528	0.256259	PREX2	phosphatidylinositol-3,4,5-trisphosphate dependent Rac exchange factor 2
ENSG00000047056	0.0711977	0.820028	0.92227	WDR37	WD repeat domain 37
ENSG00000047188	-0.0105672	0.959511	0.984939	YTHDC2	YTH domain containing 2
ENSG00000047230	-0.0012295	0.997442	0.999264	CTPS2	CTP synthase 2
ENSG00000047249	-0.028166	0.911023	0.963743	ATP6V1H	ATPase H+ transporting V1 subunit H
ENSG00000047315	-0.186484	0.316289	0.578175	POLR2B	RNA polymerase II subunit B
ENSG00000047346	0.0233409	0.9239	0.969187	FAM214A	family with sequence similarity 214 member A
ENSG00000047365	0.663107	0.140738	0.370055	ARAP2	ArfGAP with RhoGAP domain, ankyrin repeat and PH domain 2
ENSG00000047410	0.573593	0.023216	0.127423	TPR	translocated promoter region, nuclear basket protein
ENSG00000047457	-0.23312	0.563234	0.777645	CP	ceruloplasmin
ENSG00000047578	0.727133	0.0824216	0.270217	KIAA0556	KIAA0556
ENSG00000047579	-0.475029	0.0130586	0.0924682	DTNBP1	dystrobrevin binding protein 1
ENSG00000047597	-0.0496181	0.881359	0.949548	XK	X-linked Kx blood group
ENSG00000047617	0.252077	0.598934	NA	ANO2	anoctamin 2
ENSG00000047621	0.000404797	0.99876	0.999667	C12orf4	chromosome 12 open reading frame 4
ENSG00000047634	0.102372	0.762723	0.895155	SCML1	Scm polycomb group protein like 1
ENSG00000047644	-0.267015	0.111259	0.321117	WWC3	WWC family member 3
ENSG00000047648	-0.722283	0.0221124	0.124076	ARHGAP6	Rho GTPase activating protein 6
ENSG00000047662	0.181884	0.550827	0.769335	FAM184B	family with sequence similarity 184 member B
ENSG00000047849	0.0936645	0.709642	0.865105	MAP4	microtubule associated protein 4
ENSG00000047932	0.114062	0.625317	0.818753	GOPC	golgi associated PDZ and coiled-coil motif containing
ENSG00000047936	0.276246	0.480883	NA	ROS1	ROS proto-oncogene 1, receptor tyrosine kinase
ENSG00000048028	-0.138536	0.578198	0.786718	USP28	ubiquitin specific peptidase 28
ENSG00000048052	0.391737	0.115962	0.328405	HDAC9	histone deacetylase 9
ENSG00000048140	-0.234518	0.562155	0.7769	TSPAN17	tetraspanin 17
ENSG00000048162	-0.523754	0.0339153	0.159665	NOP16	NOP16 nucleolar protein
ENSG00000048342	0.613767	0.0696666	0.244743	CC2D2A	coiled-coil and C2 domain containing 2A
ENSG00000048392	-0.159672	0.500473	0.735238	RRM2B	ribonucleotide reductase regulatory TP53 inducible subunit M2B
ENSG00000048405	0.0280764	0.91464	0.965471	ZNF800	zinc finger protein 800
ENSG00000048462	-0.198089	0.676799	NA	TNFRSF17	TNF receptor superfamily member 17
ENSG00000048471	0.346533	0.19958	0.452686	SNX29	sorting nexin 29
ENSG00000048540	-0.412953	0.101971	0.305474	LMO3	LIM domain only 3
ENSG00000048544	-0.263526	0.199724	0.452764	MRPS10	mitochondrial ribosomal protein S10
ENSG00000048649	0.155913	0.522093	0.750416	RSF1	remodeling and spacing factor 1
ENSG00000048707	-0.340417	0.194372	0.44657	VPS13D	vacuolar protein sorting 13 homolog D
ENSG00000048740	-0.265158	0.326812	0.588256	CELF2	CUGBP Elav-like family member 2
ENSG00000048828	-0.0173026	0.938065	0.975623	FAM120A	family with sequence similarity 120A
ENSG00000048991	0.794481	0.0080883	0.0697341	R3HDM1	R3H domain containing 1
ENSG00000049089	0.431973	0.363232	NA	COL9A2	collagen type IX alpha 2 chain
ENSG00000049130	-0.383578	0.242743	0.503867	KITLG	KIT ligand
ENSG00000049167	0.29126	0.287142	0.550376	ERCC8	ERCC excision repair 8, CSA ubiquitin ligase complex subunit
ENSG00000049192	-0.317591	0.498436	0.733833	ADAMTS6	ADAM metallopeptidase with thrombospondin type 1 motif 6
ENSG00000049239	0.667537	0.000735159	0.0185649	H6PD	hexose-6-phosphate dehydrogenase/glucose 1-dehydrogenase
ENSG00000049245	-0.262628	0.0582196	0.220772	VAMP3	vesicle associated membrane protein 3
ENSG00000049246	0.256044	0.490718	0.727844	PER3	period circadian regulator 3
ENSG00000049247	-0.273159	0.590399	NA	UTS2	urotensin 2
ENSG00000049249	0.912899	0.00509707	0.0544603	TNFRSF9	TNF receptor superfamily member 9
ENSG00000049283	-0.519823	0.220726	0.478729	EPN3	epsin 3
ENSG00000049323	0.408618	0.120757	0.336613	LTBP1	latent transforming growth factor beta binding protein 1
ENSG00000049449	-0.283542	0.32885	0.590727	RCN1	reticulocalbin 1
ENSG00000049540	-0.2479	0.376563	0.634708	ELN	elastin
ENSG00000049541	0.839385	0.0125239	0.0901493	RFC2	replication factor C subunit 2
ENSG00000049618	-0.213547	0.280924	0.543624	ARID1B	AT-rich interaction domain 1B
ENSG00000049656	-0.336875	0.146477	0.378552	CLPTM1L	CLPTM1 like
ENSG00000049759	-0.0664931	0.828022	0.925587	NEDD4L	neural precursor cell expressed, developmentally down-regulated 4-like, E3 ubiquitin protein ligase
ENSG00000049768	-0.158146	0.753236	NA	FOXP3	forkhead box P3
ENSG00000049769	0.122734	0.725747	0.874933	PPP1R3F	protein phosphatase 1 regulatory subunit 3F
ENSG00000049860	0.0696148	0.8136	0.920022	HEXB	hexosaminidase subunit beta
ENSG00000049883	0.568527	0.0221484	0.124152	PTCD2	pentatricopeptide repeat domain 2
ENSG00000050030	0.539887	0.284944	0.548247	NEXMIF	neurite extension and migration factor
ENSG00000050130	0.00948415	0.965047	0.987068	JKAMP	JNK1/MAPK8 associated membrane protein
ENSG00000050165	-0.41602	0.186185	0.435939	DKK3	dickkopf WNT signaling pathway inhibitor 3
ENSG00000050327	-0.233632	0.643765	NA	ARHGEF5	Rho guanine nucleotide exchange factor 5
ENSG00000050344	0.817241	0.108624	NA	NFE2L3	nuclear factor, erythroid 2 like 3
ENSG00000050393	0.098196	0.604865	0.804987	MCUR1	mitochondrial calcium uniporter regulator 1
ENSG00000050405	0.310235	0.302336	0.564484	LIMA1	LIM domain and actin binding 1
ENSG00000050426	0.389047	0.19641	0.449197	LETMD1	LETM1 domain containing 1
ENSG00000050438	0.951492	0.00139159	0.0261948	SLC4A8	solute carrier family 4 member 8
ENSG00000050555	0.524864	0.218756	0.476879	LAMC3	laminin subunit gamma 3
ENSG00000050628	1.57342	0.00179312	0.0302174	PTGER3	prostaglandin E receptor 3
ENSG00000050730	1.04373	0.00794897	0.068878	TNIP3	TNFAIP3 interacting protein 3
ENSG00000050748	-0.510565	0.00346711	0.0438917	MAPK9	mitogen-activated protein kinase 9
ENSG00000050767	-0.2994	0.38985	0.64671	COL23A1	collagen type XXIII alpha 1 chain
ENSG00000050820	-0.0948302	0.770103	0.898912	BCAR1	BCAR1, Cas family scaffold protein
ENSG00000051009	-0.323104	0.350733	0.610852	FAM160A2	family with sequence similarity 160 member A2
ENSG00000051108	-0.0888095	0.607459	0.806941	HERPUD1	homocysteine inducible ER protein with ubiquitin like domain 1
ENSG00000051128	0.342513	0.422229	0.675105	HOMER3	homer scaffold protein 3
ENSG00000051180	0.618586	0.145098	0.376345	RAD51	RAD51 recombinase
ENSG00000051341	0.788616	0.0445608	0.18786	POLQ	DNA polymerase theta
ENSG00000051382	-0.0272549	0.913875	0.96514	PIK3CB	phosphatidylinositol-4,5-bisphosphate 3-kinase catalytic subunit beta
ENSG00000051523	-0.903183	0.034313	0.160886	CYBA	cytochrome b-245 alpha chain
ENSG00000051596	1.02117	0.0377661	0.170139	THOC3	THO complex 3
ENSG00000051620	-0.00470776	0.979091	0.992556	HEBP2	heme binding protein 2
ENSG00000051825	0.396114	0.137036	0.364117	MPHOSPH9	M-phase phosphoprotein 9
ENSG00000052126	0.419013	0.0153346	0.100474	PLEKHA5	pleckstrin homology domain containing A5
ENSG00000052344	0.80716	0.10349	0.308269	PRSS8	serine protease 8
ENSG00000052723	0.197859	0.403734	0.658891	SIKE1	suppressor of IKBKE 1
ENSG00000052749	-0.103975	0.740082	0.8827	RRP12	ribosomal RNA processing 12 homolog
ENSG00000052795	-0.203882	0.384528	0.641585	FNIP2	folliculin interacting protein 2
ENSG00000052802	-0.178878	0.578418	0.786869	MSMO1	methylsterol monooxygenase 1
ENSG00000052841	-0.0824929	0.782773	0.904661	TTC17	tetratricopeptide repeat domain 17
ENSG00000052850	0.0201592	0.935498	NA	ALX4	ALX homeobox 4
ENSG00000053108	0.2435	0.582364	NA	FSTL4	follistatin like 4
ENSG00000053254	-0.35002	0.0497943	0.200624	FOXN3	forkhead box N3
ENSG00000053328	0.0591064	0.812399	NA	METTL24	methyltransferase like 24
ENSG00000053371	-0.329055	0.188633	0.438759	AKR7A2	aldo-keto reductase family 7 member A2
ENSG00000053372	0.746376	0.0116527	0.0867178	MRTO4	MRT4 homolog, ribosome maturation factor
ENSG00000053438	0.119391	0.672836	NA	NNAT	neuronatin
ENSG00000053501	0.247529	0.361848	0.621268	USE1	unconventional SNARE in the ER 1
ENSG00000053524	0.93234	0.001772	0.0301798	MCF2L2	MCF.2 cell line derived transforming sequence-like 2
ENSG00000053702	-0.427517	0.25566	0.518091	NRIP2	nuclear receptor interacting protein 2
ENSG00000053747	-0.525547	0.182784	0.431113	LAMA3	laminin subunit alpha 3
ENSG00000053770	0.306504	0.305212	0.567276	AP5M1	adaptor related protein complex 5 subunit mu 1
ENSG00000053900	0.119656	0.715719	0.868744	ANAPC4	anaphase promoting complex subunit 4
ENSG00000053918	-0.196379	0.515409	0.746016	KCNQ1	potassium voltage-gated channel subfamily Q member 1
ENSG00000054116	-0.0231453	0.915079	0.965621	TRAPPC3	trafficking protein particle complex 3
ENSG00000054118	-0.0844598	0.695395	0.858537	THRAP3	thyroid hormone receptor associated protein 3
ENSG00000054148	-0.215831	0.592444	0.796193	PHPT1	phosphohistidine phosphatase 1
ENSG00000054179	-1.07914	0.0268448	0.139121	ENTPD2	ectonucleoside triphosphate diphosphohydrolase 2
ENSG00000054219	0.823084	0.0788887	0.263342	LY75	lymphocyte antigen 75
ENSG00000054267	0.286235	0.16884	0.412219	ARID4B	AT-rich interaction domain 4B
ENSG00000054277	0.153359	0.687425	0.855043	OPN3	opsin 3
ENSG00000054282	0.814501	0.00124068	0.0249621	SDCCAG8	serologically defined colon cancer antigen 8
ENSG00000054356	0.167896	0.605906	NA	PTPRN	protein tyrosine phosphatase, receptor type N
ENSG00000054392	0.697444	0.16739	0.410149	HHAT	hedgehog acyltransferase
ENSG00000054523	-0.0615855	0.784778	0.906099	KIF1B	kinesin family member 1B
ENSG00000054598	-0.304112	0.425471	0.678015	FOXC1	forkhead box C1
ENSG00000054611	0.0618874	0.842105	0.932954	TBC1D22A	TBC1 domain family member 22A
ENSG00000054654	0.0132374	0.95324	0.982413	SYNE2	spectrin repeat containing nuclear envelope protein 2
ENSG00000054690	0.848723	0.00399215	0.0473257	PLEKHH1	pleckstrin homology, MyTH4 and FERM domain containing H1
ENSG00000054793	0.234705	0.350878	0.610968	ATP9A	ATPase phospholipid transporting 9A (putative)
ENSG00000054803	0.0789267	0.751365	NA	CBLN4	cerebellin 4 precursor
ENSG00000054938	-0.428797	0.323238	NA	CHRDL2	chordin like 2
ENSG00000054965	-0.128968	0.571132	0.78234	FAM168A	family with sequence similarity 168 member A
ENSG00000054967	-0.34892	0.444861	0.692965	RELT	RELT, TNF receptor
ENSG00000054983	-0.0343882	0.846309	0.93505	GALC	galactosylceramidase
ENSG00000055044	0.060598	0.782575	0.904661	NOP58	NOP58 ribonucleoprotein
ENSG00000055070	-0.837802	9.44295e-05	0.00573763	SZRD1	SUZ RNA binding domain containing 1
ENSG00000055118	-0.323521	0.159039	0.39812	KCNH2	potassium voltage-gated channel subfamily H member 2
ENSG00000055130	-0.246553	0.238648	0.499019	CUL1	cullin 1
ENSG00000055147	0.00128087	0.99492	0.998654	FAM114A2	family with sequence similarity 114 member A2
ENSG00000055163	0.520808	0.0595273	0.224088	CYFIP2	cytoplasmic FMR1 interacting protein 2
ENSG00000055208	-0.546984	0.004183	0.0483737	TAB2	TGF-beta activated kinase 1 (MAP3K7) binding protein 2
ENSG00000055211	0.0234071	0.915569	0.965836	GINM1	glycoprotein integral membrane 1
ENSG00000055332	0.566426	0.00544915	0.0564818	EIF2AK2	eukaryotic translation initiation factor 2 alpha kinase 2
ENSG00000055483	0.0179903	0.950789	0.981163	USP36	ubiquitin specific peptidase 36
ENSG00000055609	0.554534	0.0253598	0.134507	KMT2C	lysine methyltransferase 2C
ENSG00000055732	-0.157198	0.536908	0.759917	MCOLN3	mucolipin 3
ENSG00000055813	-0.961589	0.0130355	0.0923934	CCDC85A	coiled-coil domain containing 85A
ENSG00000055917	-0.0705056	0.737042	0.881207	PUM2	pumilio RNA binding family member 2
ENSG00000055950	-0.401039	0.0764763	0.258812	MRPL43	mitochondrial ribosomal protein L43
ENSG00000055955	0.384067	0.447021	NA	ITIH4	inter-alpha-trypsin inhibitor heavy chain family member 4
ENSG00000055957	0.0779107	0.754459	NA	ITIH1	inter-alpha-trypsin inhibitor heavy chain 1
ENSG00000056050	0.0964034	0.689102	0.856113	HPF1	histone PARylation factor 1
ENSG00000056097	0.0808706	0.706095	0.863914	ZFR	zinc finger RNA binding protein
ENSG00000056277	0.668916	0.0845453	0.274303	ZNF280C	zinc finger protein 280C
ENSG00000056291	0.96293	0.0409635	0.179074	NPFFR2	neuropeptide FF receptor 2
ENSG00000056487	-0.0867517	0.78602	NA	PHF21B	PHD finger protein 21B
ENSG00000056558	-0.368873	0.435085	0.684926	TRAF1	TNF receptor associated factor 1
ENSG00000056586	-0.0859088	0.655719	0.837605	RC3H2	ring finger and CCCH-type domains 2
ENSG00000056736	0.356403	0.431505	0.682546	IL17RB	interleukin 17 receptor B
ENSG00000056972	0.553802	0.0227161	0.125966	TRAF3IP2	TRAF3 interacting protein 2
ENSG00000056998	0.485274	0.310844	0.572802	GYG2	glycogenin 2
ENSG00000057019	-0.0995579	0.719585	0.870726	DCBLD2	discoidin, CUB and LCCL domain containing 2
ENSG00000057252	0.0634148	0.749048	0.887643	SOAT1	sterol O-acyltransferase 1
ENSG00000057294	0.0623772	0.758753	0.893024	PKP2	plakophilin 2
ENSG00000057468	0.125513	0.664442	NA	MSH4	mutS homolog 4
ENSG00000057593	0.183514	0.69137	NA	F7	coagulation factor VII
ENSG00000057608	0.118248	0.600492	0.801723	GDI2	GDP dissociation inhibitor 2
ENSG00000057657	-0.433048	0.168893	0.412269	PRDM1	PR/SET domain 1
ENSG00000057663	-0.132735	0.650937	0.834427	ATG5	autophagy related 5
ENSG00000057704	-0.419164	0.236214	0.49667	TMCC3	transmembrane and coiled-coil domain family 3
ENSG00000057757	-0.290274	0.166247	0.408651	PITHD1	PITH domain containing 1
ENSG00000057935	0.205038	0.400398	0.656688	MTA3	metastasis associated 1 family member 3
ENSG00000058056	-0.0865938	0.722141	0.872245	USP13	ubiquitin specific peptidase 13
ENSG00000058063	-0.114953	0.700039	0.861708	ATP11B	ATPase phospholipid transporting 11B (putative)
ENSG00000058085	0.267025	0.483309	0.722797	LAMC2	laminin subunit gamma 2
ENSG00000058091	-0.445864	0.159935	0.399196	CDK14	cyclin dependent kinase 14
ENSG00000058262	-0.733083	0.00237113	0.0354344	SEC61A1	Sec61 translocon alpha 1 subunit
ENSG00000058272	-0.092759	0.615087	0.812132	PPP1R12A	protein phosphatase 1 regulatory subunit 12A
ENSG00000058335	1.16149	0.019518	0.114974	RASGRF1	Ras protein specific guanine nucleotide releasing factor 1
ENSG00000058404	-0.366692	0.204897	0.459323	CAMK2B	calcium/calmodulin dependent protein kinase II beta
ENSG00000058453	0.774356	0.0773075	0.260217	CROCC	ciliary rootlet coiled-coil, rootletin
ENSG00000058600	-0.047171	0.829498	0.926113	POLR3E	RNA polymerase III subunit E
ENSG00000058668	-0.0213197	0.936811	0.975127	ATP2B4	ATPase plasma membrane Ca2+ transporting 4
ENSG00000058673	-0.411372	0.0380711	0.171027	ZC3H11A	zinc finger CCCH-type containing 11A
ENSG00000058729	0.391858	0.111192	0.321047	RIOK2	RIO kinase 2
ENSG00000058799	0.0954706	0.787797	0.907819	YIPF1	Yip1 domain family member 1
ENSG00000058804	0.0363684	0.907881	0.96232	NDC1	NDC1 transmembrane nucleoporin
ENSG00000058866	0.492227	0.142013	0.371904	DGKG	diacylglycerol kinase gamma
ENSG00000059122	-0.139336	0.571647	0.782602	FLYWCH1	FLYWCH-type zinc finger 1
ENSG00000059145	0.118009	0.585821	0.791079	UNKL	unkempt family like zinc finger
ENSG00000059377	-0.0314019	0.94281	0.977383	TBXAS1	thromboxane A synthase 1
ENSG00000059378	-0.00967817	0.977269	0.991766	PARP12	poly(ADP-ribose) polymerase family member 12
ENSG00000059573	-0.0141636	0.970448	0.989035	ALDH18A1	aldehyde dehydrogenase 18 family member A1
ENSG00000059588	0.40552	0.0832629	0.271728	TARBP1	TAR (HIV-1) RNA binding protein 1
ENSG00000059691	-0.327193	0.166423	0.408909	GATB	glutamyl-tRNA amidotransferase subunit B
ENSG00000059728	0.034752	0.922878	0.968857	MXD1	MAX dimerization protein 1
ENSG00000059758	-0.185042	0.602754	0.803527	CDK17	cyclin dependent kinase 17
ENSG00000059769	-0.404788	0.11996	0.335488	DNAJC25	DnaJ heat shock protein family (Hsp40) member C25
ENSG00000059804	0.505819	0.123659	0.340814	SLC2A3	solute carrier family 2 member 3
ENSG00000059915	0.444461	0.357216	NA	PSD	pleckstrin and Sec7 domain containing
ENSG00000060069	-0.348089	0.324688	0.586583	CTDP1	CTD phosphatase subunit 1
ENSG00000060138	-0.145858	0.595988	0.798495	YBX3	Y-box binding protein 3
ENSG00000060140	0.137837	0.654423	NA	STYK1	serine/threonine/tyrosine kinase 1
ENSG00000060237	-0.147001	0.485916	0.724208	WNK1	WNK lysine deficient protein kinase 1
ENSG00000060303	0.55863	0.27182	0.535545	NA	NA
ENSG00000060339	-0.128462	0.402416	0.657663	CCAR1	cell division cycle and apoptosis regulator 1
ENSG00000060491	0.157124	0.675775	0.84862	OGFR	opioid growth factor receptor
ENSG00000060558	0.306175	0.505372	NA	GNA15	G protein subunit alpha 15
ENSG00000060642	-0.320571	0.510664	0.742735	PIGV	phosphatidylinositol glycan anchor biosynthesis class V
ENSG00000060656	0.234518	0.625068	0.818523	PTPRU	protein tyrosine phosphatase, receptor type U
ENSG00000060688	-0.703496	0.0437567	0.185551	SNRNP40	small nuclear ribonucleoprotein U5 subunit 40
ENSG00000060709	-0.0233481	0.952418	NA	RIMBP2	RIMS binding protein 2
ENSG00000060718	0.221345	0.639955	NA	COL11A1	collagen type XI alpha 1 chain
ENSG00000060749	0.219869	0.363471	0.622869	QSER1	glutamine and serine rich 1
ENSG00000060762	-0.181015	0.571769	0.782687	MPC1	mitochondrial pyruvate carrier 1
ENSG00000060971	-0.360722	0.155326	0.392909	ACAA1	acetyl-CoA acyltransferase 1
ENSG00000060982	-0.744319	0.00722938	0.065173	BCAT1	branched chain amino acid transaminase 1
ENSG00000061273	-0.546912	0.035585	0.164145	HDAC7	histone deacetylase 7
ENSG00000061337	0.281981	0.507809	0.74067	LZTS1	leucine zipper tumor suppressor 1
ENSG00000061455	0.221885	0.645234	0.8311	PRDM6	PR/SET domain 6
ENSG00000061656	-0.227219	0.65515	NA	SPAG4	sperm associated antigen 4
ENSG00000061676	-0.308013	0.0501837	0.201702	NCKAP1	NCK associated protein 1
ENSG00000061794	-0.27545	0.208472	0.464022	MRPS35	mitochondrial ribosomal protein S35
ENSG00000061918	-0.462166	0.0274949	0.141326	GUCY1B1	guanylate cyclase 1 soluble subunit beta 1
ENSG00000061936	0.0592052	0.847784	0.935487	SFSWAP	splicing factor SWAP
ENSG00000061938	0.425229	0.10063	0.303255	TNK2	tyrosine kinase non receptor 2
ENSG00000061987	0.309843	0.179598	0.426883	MON2	MON2 homolog, regulator of endosome-to-Golgi trafficking
ENSG00000062038	1.1331	0.00441735	0.0498657	CDH3	cadherin 3
ENSG00000062096	1.77789	0.000478229	0.0143611	ARSF	arylsulfatase F
ENSG00000062194	-0.11712	0.492269	0.728928	GPBP1	GC-rich promoter binding protein 1
ENSG00000062282	-0.363011	0.299543	0.562556	DGAT2	diacylglycerol O-acyltransferase 2
ENSG00000062370	0.0718661	0.838516	0.930976	ZNF112	zinc finger protein 112
ENSG00000062485	-0.327376	0.23037	0.489362	CS	citrate synthase
ENSG00000062524	-0.0298268	0.94288	NA	LTK	leukocyte receptor tyrosine kinase
ENSG00000062582	-0.191904	0.546602	0.766278	MRPS24	mitochondrial ribosomal protein S24
ENSG00000062598	0.00109427	0.996253	0.999204	ELMO2	engulfment and cell motility 2
ENSG00000062650	-0.133588	0.442409	0.690789	WAPL	WAPL cohesin release factor
ENSG00000062716	-0.917379	7.45019e-05	0.00493536	VMP1	vacuole membrane protein 1
ENSG00000062725	0.0227215	0.893337	0.95455	APPBP2	amyloid beta precursor protein binding protein 2
ENSG00000062822	-0.223767	0.632528	0.822765	POLD1	DNA polymerase delta 1, catalytic subunit
ENSG00000063015	-0.413528	0.0314345	0.152847	SEZ6	seizure related 6 homolog
ENSG00000063046	-0.635563	0.000235701	0.00942465	EIF4B	eukaryotic translation initiation factor 4B
ENSG00000063127	1.37515	0.00592001	0.0587553	SLC6A16	solute carrier family 6 member 16
ENSG00000063169	0.525281	0.15148	0.386975	BICRA	BRD4 interacting chromatin remodeling complex associated protein
ENSG00000063176	0.0416725	0.906306	0.961372	SPHK2	sphingosine kinase 2
ENSG00000063177	-0.50102	0.125359	0.344174	RPL18	ribosomal protein L18
ENSG00000063180	-0.421006	0.276945	0.540209	CA11	carbonic anhydrase 11
ENSG00000063241	-0.537029	0.191919	0.442849	ISOC2	isochorismatase domain containing 2
ENSG00000063244	-0.685846	0.00726508	0.065312	U2AF2	U2 small nuclear RNA auxiliary factor 2
ENSG00000063245	0.126555	0.469515	0.71181	EPN1	epsin 1
ENSG00000063322	0.246385	0.300866	0.563711	MED29	mediator complex subunit 29
ENSG00000063438	0.692196	0.144951	NA	AHRR	aryl-hydrocarbon receptor repressor
ENSG00000063587	-0.357168	0.136124	0.362724	ZNF275	zinc finger protein 275
ENSG00000063601	-0.131022	0.674771	0.847743	MTMR1	myotubularin related protein 1
ENSG00000063660	-0.216924	0.47911	0.719568	GPC1	glypican 1
ENSG00000063761	0.0246928	0.947726	0.980117	ADCK1	aarF domain containing kinase 1
ENSG00000063854	-0.116562	0.548217	0.76757	HAGH	hydroxyacylglutathione hydrolase
ENSG00000063978	0.135969	0.566364	0.779495	RNF4	ring finger protein 4
ENSG00000064012	0.887035	0.00179463	0.0302174	CASP8	caspase 8
ENSG00000064042	0.156755	0.495543	0.731223	LIMCH1	LIM and calponin homology domains 1
ENSG00000064102	-0.136651	0.588062	0.792944	INTS13	integrator complex subunit 13
ENSG00000064115	0.337364	0.242358	0.503361	TM7SF3	transmembrane 7 superfamily member 3
ENSG00000064195	0.0157317	0.94964	NA	DLX3	distal-less homeobox 3
ENSG00000064199	-0.534903	0.177501	0.423969	SPA17	sperm autoantigenic protein 17
ENSG00000064201	0.5911	0.0866766	0.278772	TSPAN32	tetraspanin 32
ENSG00000064205	0.43973	0.265731	0.529268	WISP2	WNT1 inducible signaling pathway protein 2
ENSG00000064218	0.0656431	0.792121	NA	DMRT3	doublesex and mab-3 related transcription factor 3
ENSG00000064225	0.289425	0.158259	0.396651	ST3GAL6	ST3 beta-galactoside alpha-2,3-sialyltransferase 6
ENSG00000064270	-0.0547853	0.881225	0.949548	ATP2C2	ATPase secretory pathway Ca2+ transporting 2
ENSG00000064300	-1.15696	0.00324478	0.0421347	NGFR	nerve growth factor receptor
ENSG00000064309	0.426677	0.143022	0.373142	CDON	cell adhesion associated, oncogene regulated
ENSG00000064313	0.0156796	0.92911	0.971358	TAF2	TATA-box binding protein associated factor 2
ENSG00000064393	-0.0912717	0.764111	0.896079	HIPK2	homeodomain interacting protein kinase 2
ENSG00000064419	0.172523	0.484765	0.723671	TNPO3	transportin 3
ENSG00000064489	0.144909	0.731728	0.878208	BORCS8-MEF2B	BORCS8-MEF2B readthrough
ENSG00000064490	0.165571	0.676642	0.848979	RFXANK	regulatory factor X associated ankyrin containing protein
ENSG00000064545	0.371712	0.353415	0.612972	TMEM161A	transmembrane protein 161A
ENSG00000064547	0.0916929	0.722275	NA	LPAR2	lysophosphatidic acid receptor 2
ENSG00000064601	-1.23787	1.0335e-08	9.17417e-06	CTSA	cathepsin A
ENSG00000064607	0.126964	0.553927	0.77151	SUGP2	SURP and G-patch domain containing 2
ENSG00000064651	-0.0611805	0.769291	0.898719	SLC12A2	solute carrier family 12 member 2
ENSG00000064652	0.123975	0.646119	0.831122	SNX24	sorting nexin 24
ENSG00000064655	0.0986208	0.830994	NA	EYA2	EYA transcriptional coactivator and phosphatase 2
ENSG00000064666	0.109451	0.637368	0.825617	CNN2	calponin 2
ENSG00000064687	0.38985	0.444234	NA	ABCA7	ATP binding cassette subfamily A member 7
ENSG00000064692	1.02642	0.0339772	0.159852	SNCAIP	synuclein alpha interacting protein
ENSG00000064703	-0.151534	0.531758	0.757092	DDX20	DEAD-box helicase 20
ENSG00000064726	-0.0166744	0.939865	0.976245	BTBD1	BTB domain containing 1
ENSG00000064763	-0.173789	0.582887	0.789075	FAR2	fatty acyl-CoA reductase 2
ENSG00000064787	0.982431	0.024338	0.131257	BCAS1	breast carcinoma amplified sequence 1
ENSG00000064835	0.0866439	0.740666	NA	POU1F1	POU class 1 homeobox 1
ENSG00000064886	-0.448425	0.368592	0.627311	CHI3L2	chitinase 3 like 2
ENSG00000064932	-0.300813	0.414976	0.668491	SBNO2	strawberry notch homolog 2
ENSG00000064933	0.149539	0.529642	0.755572	PMS1	PMS1 homolog 1, mismatch repair system component
ENSG00000064961	0.441712	0.190316	0.440637	HMG20B	high mobility group 20B
ENSG00000064989	-0.0242588	0.923942	0.969187	CALCRL	calcitonin receptor like receptor
ENSG00000064995	0.0476124	0.855397	0.938672	TAF11	TATA-box binding protein associated factor 11
ENSG00000064999	0.0780383	0.73763	0.881448	ANKS1A	ankyrin repeat and sterile alpha motif domain containing 1A
ENSG00000065000	-0.347086	0.101247	0.304248	AP3D1	adaptor related protein complex 3 subunit delta 1
ENSG00000065029	-0.549577	0.00747694	0.0662388	ZNF76	zinc finger protein 76
ENSG00000065054	-1.39071	1.72697e-09	2.25441e-06	SLC9A3R2	SLC9A3 regulator 2
ENSG00000065057	-0.635421	0.0662752	0.238221	NTHL1	nth like DNA glycosylase 1
ENSG00000065060	-0.00584629	0.986046	0.995787	UHRF1BP1	UHRF1 binding protein 1
ENSG00000065135	0.150982	0.42938	0.680823	GNAI3	G protein subunit alpha i3
ENSG00000065150	-0.196763	0.274956	0.538222	IPO5	importin 5
ENSG00000065154	0.18158	0.47792	0.718438	OAT	ornithine aminotransferase
ENSG00000065183	0.351578	0.122366	0.339443	WDR3	WD repeat domain 3
ENSG00000065243	0.560064	0.0269205	0.139324	PKN2	protein kinase N2
ENSG00000065268	-1.00955	0.00202142	0.0322434	WDR18	WD repeat domain 18
ENSG00000065308	0.0509521	0.853321	0.937748	TRAM2	translocation associated membrane protein 2
ENSG00000065320	-0.306803	0.509482	0.741891	NTN1	netrin 1
ENSG00000065325	0.101633	0.705825	NA	GLP2R	glucagon like peptide 2 receptor
ENSG00000065328	0.737454	0.129474	0.351559	MCM10	minichromosome maintenance 10 replication initiation factor
ENSG00000065357	0.200372	0.550331	0.769028	DGKA	diacylglycerol kinase alpha
ENSG00000065361	0.20972	0.337435	0.598878	ERBB3	erb-b2 receptor tyrosine kinase 3
ENSG00000065371	0.721981	0.156439	NA	ROPN1	rhophilin associated tail protein 1
ENSG00000065413	0.450404	0.0975261	0.297913	ANKRD44	ankyrin repeat domain 44
ENSG00000065427	-0.207203	0.302922	0.565148	KARS	lysyl-tRNA synthetase
ENSG00000065457	0.16955	0.499943	0.734897	ADAT1	adenosine deaminase, tRNA specific 1
ENSG00000065485	0.237179	0.335517	0.597421	PDIA5	protein disulfide isomerase family A member 5
ENSG00000065491	-0.40469	0.312446	0.574229	TBC1D22B	TBC1 domain family member 22B
ENSG00000065518	-0.0588687	0.876269	0.947047	NDUFB4	NADH:ubiquinone oxidoreductase subunit B4
ENSG00000065526	-0.111183	0.570864	0.782149	SPEN	spen family transcriptional repressor
ENSG00000065534	-0.339933	0.221112	0.479109	MYLK	myosin light chain kinase
ENSG00000065548	0.201154	0.354881	0.61465	ZC3H15	zinc finger CCCH-type containing 15
ENSG00000065559	-0.395835	0.0375346	0.16944	MAP2K4	mitogen-activated protein kinase kinase 4
ENSG00000065600	-0.235182	0.641977	0.828989	TMEM206	transmembrane protein 206
ENSG00000065609	-1.1159	0.0258919	0.136192	SNAP91	synaptosome associated protein 91
ENSG00000065613	0.0829395	0.708333	0.864677	SLK	STE20 like kinase
ENSG00000065615	-0.0236446	0.915092	0.965621	CYB5R4	cytochrome b5 reductase 4
ENSG00000065618	0.00271248	0.99131	NA	COL17A1	collagen type XVII alpha 1 chain
ENSG00000065621	0.113092	0.770569	0.899258	GSTO2	glutathione S-transferase omega 2
ENSG00000065665	-0.385449	0.114302	0.326165	SEC61A2	Sec61 translocon alpha 2 subunit
ENSG00000065675	0.46519	0.356583	NA	PRKCQ	protein kinase C theta
ENSG00000065717	-0.428876	0.177539	0.423969	TLE2	transducin like enhancer of split 2
ENSG00000065802	-0.511626	0.0213183	0.121411	ASB1	ankyrin repeat and SOCS box containing 1
ENSG00000065809	0.574936	0.191412	0.442297	FAM107B	family with sequence similarity 107 member B
ENSG00000065833	-0.282944	0.426362	0.678546	ME1	malic enzyme 1
ENSG00000065882	-0.447633	0.014943	0.0990486	TBC1D1	TBC1 domain family member 1
ENSG00000065883	-0.0116239	0.942981	0.977424	CDK13	cyclin dependent kinase 13
ENSG00000065911	-0.17426	0.513466	0.744663	MTHFD2	methylenetetrahydrofolate dehydrogenase (NADP+ dependent) 2, methenyltetrahydrofolate cyclohydrolase
ENSG00000065923	0.428754	0.0817738	0.268888	SLC9A7	solute carrier family 9 member A7
ENSG00000065970	-0.621216	0.008247	0.0703689	FOXJ2	forkhead box J2
ENSG00000065978	-0.482379	0.00592677	0.0587698	YBX1	Y-box binding protein 1
ENSG00000065989	-0.125026	0.736953	0.881167	PDE4A	phosphodiesterase 4A
ENSG00000066027	-0.635653	0.00100216	0.0219981	PPP2R5A	protein phosphatase 2 regulatory subunit B'alpha
ENSG00000066032	0.391021	0.438315	NA	CTNNA2	catenin alpha 2
ENSG00000066044	0.217369	0.258463	0.521438	ELAVL1	ELAV like RNA binding protein 1
ENSG00000066056	-1.14025	8.20525e-07	0.000239422	TIE1	tyrosine kinase with immunoglobulin like and EGF like domains 1
ENSG00000066084	0.183601	0.302025	0.564328	DIP2B	disco interacting protein 2 homolog B
ENSG00000066117	-0.57466	0.022382	0.124894	SMARCD1	SWI/SNF related, matrix associated, actin dependent regulator of chromatin, subfamily d, member 1
ENSG00000066135	-0.268164	0.429485	0.680941	KDM4A	lysine demethylase 4A
ENSG00000066136	-0.387889	0.0286613	0.144491	NFYC	nuclear transcription factor Y subunit gamma
ENSG00000066185	-0.0352813	0.933267	0.973087	ZMYND12	zinc finger MYND-type containing 12
ENSG00000066248	0.329577	0.421749	NA	NGEF	neuronal guanine nucleotide exchange factor
ENSG00000066279	0.524089	0.29515	0.558157	ASPM	abnormal spindle microtubule assembly
ENSG00000066294	0.53948	0.0789424	0.263482	CD84	CD84 molecule
ENSG00000066322	-0.133025	0.716969	0.869547	ELOVL1	ELOVL fatty acid elongase 1
ENSG00000066336	-1.145	0.00121889	0.0247935	SPI1	Spi-1 proto-oncogene
ENSG00000066379	0.0362578	0.943243	NA	ZNRD1	zinc ribbon domain containing 1
ENSG00000066382	-0.250163	0.43251	0.683127	MPPED2	metallophosphoesterase domain containing 2
ENSG00000066405	0.299084	0.539694	0.761336	CLDN18	claudin 18
ENSG00000066422	-0.273353	0.163814	0.405099	ZBTB11	zinc finger and BTB domain containing 11
ENSG00000066427	0.720907	0.000124254	0.00670912	ATXN3	ataxin 3
ENSG00000066455	-0.0593736	0.836221	0.930058	GOLGA5	golgin A5
ENSG00000066468	0.824051	0.0227679	0.126135	FGFR2	fibroblast growth factor receptor 2
ENSG00000066557	0.379337	0.246762	0.507991	LRRC40	leucine rich repeat containing 40
ENSG00000066583	-0.0715969	0.796224	0.911613	ISOC1	isochorismatase domain containing 1
ENSG00000066629	-0.103159	0.620487	0.815362	EML1	echinoderm microtubule associated protein like 1
ENSG00000066651	0.00129155	0.996627	0.999238	TRMT11	tRNA methyltransferase 11 homolog
ENSG00000066654	0.283038	0.160577	0.400204	THUMPD1	THUMP domain containing 1
ENSG00000066697	-0.0347804	0.909448	0.963134	MSANTD3	Myb/SANT DNA binding domain containing 3
ENSG00000066735	-0.646403	0.121847	0.338568	KIF26A	kinesin family member 26A
ENSG00000066739	0.0746436	0.763722	0.895846	ATG2B	autophagy related 2B
ENSG00000066777	0.0972598	0.584939	0.790531	ARFGEF1	ADP ribosylation factor guanine nucleotide exchange factor 1
ENSG00000066813	0.777634	0.0508524	0.203269	ACSM2B	acyl-CoA synthetase medium chain family member 2B
ENSG00000066827	-0.397564	0.114363	0.326257	ZFAT	zinc finger and AT-hook domain containing
ENSG00000066855	0.0962002	0.715998	0.868844	MTFR1	mitochondrial fission regulator 1
ENSG00000066923	0.149316	0.757239	0.892109	STAG3	stromal antigen 3
ENSG00000066926	-0.286491	0.263452	0.527189	FECH	ferrochelatase
ENSG00000066933	-0.24538	0.1582	0.396651	MYO9A	myosin IXA
ENSG00000067048	0.0685489	0.885058	0.951044	DDX3Y	DEAD-box helicase 3 Y-linked
ENSG00000067057	0.0440958	0.879614	0.948475	PFKP	phosphofructokinase, platelet
ENSG00000067064	0.0641365	0.797271	0.912529	IDI1	isopentenyl-diphosphate delta isomerase 1
ENSG00000067066	-0.00127432	0.996203	0.999204	SP100	SP100 nuclear antigen
ENSG00000067082	-0.527113	0.0168212	0.105302	KLF6	Kruppel like factor 6
ENSG00000067113	-0.30147	0.197671	0.450702	PLPP1	phospholipid phosphatase 1
ENSG00000067141	0.202271	0.606954	0.806558	NEO1	neogenin 1
ENSG00000067167	-0.365457	0.0270194	0.13957	TRAM1	translocation associated membrane protein 1
ENSG00000067177	0.249522	0.41848	0.671748	PHKA1	phosphorylase kinase regulatory subunit alpha 1
ENSG00000067182	-0.950596	5.66727e-06	0.00100245	TNFRSF1A	TNF receptor superfamily member 1A
ENSG00000067191	-0.797456	0.11651	NA	CACNB1	calcium voltage-gated channel auxiliary subunit beta 1
ENSG00000067208	0.496079	0.00797496	0.0689444	EVI5	ecotropic viral integration site 5
ENSG00000067221	0.566508	0.0287317	0.144748	STOML1	stomatin like 1
ENSG00000067225	-0.715698	3.58174e-06	0.000729229	PKM	pyruvate kinase M1/2
ENSG00000067248	0.0659596	0.815506	0.920909	DHX29	DExH-box helicase 29
ENSG00000067334	0.273387	0.158271	0.396651	DNTTIP2	deoxynucleotidyltransferase terminal interacting protein 2
ENSG00000067365	0.750339	0.0134293	0.0936003	METTL22	methyltransferase like 22
ENSG00000067369	-0.156518	0.385365	0.642481	TP53BP1	tumor protein p53 binding protein 1
ENSG00000067445	0.217521	0.655558	0.837526	TRO	trophinin
ENSG00000067533	0.247336	0.143346	0.373548	RRP15	ribosomal RNA processing 15 homolog
ENSG00000067560	-0.447618	0.00701448	0.0642979	RHOA	ras homolog family member A
ENSG00000067596	0.228179	0.445052	0.693013	DHX8	DEAH-box helicase 8
ENSG00000067601	0.183094	0.671525	NA	PMS2P4	PMS1 homolog 2, mismatch repair system component pseudogene 4
ENSG00000067606	0.116544	0.788758	0.908045	PRKCZ	protein kinase C zeta
ENSG00000067646	0.197742	0.695291	0.858505	ZFY	zinc finger protein Y-linked
ENSG00000067704	-0.00888879	0.976883	0.99172	IARS2	isoleucyl-tRNA synthetase 2, mitochondrial
ENSG00000067715	0.386678	0.428118	0.68	SYT1	synaptotagmin 1
ENSG00000067798	0.542633	0.0707412	0.247032	NAV3	neuron navigator 3
ENSG00000067829	-0.484388	0.0305322	0.150304	IDH3G	isocitrate dehydrogenase 3 (NAD(+)) gamma
ENSG00000067836	0.360733	0.288779	0.552036	ROGDI	rogdi homolog
ENSG00000067840	-0.0514525	0.916137	0.966012	PDZD4	PDZ domain containing 4
ENSG00000067900	0.0539922	0.840001	0.931774	ROCK1	Rho associated coiled-coil containing protein kinase 1
ENSG00000067955	-0.375072	0.138641	0.36691	CBFB	core-binding factor subunit beta
ENSG00000067992	0.543695	0.112679	0.323231	PDK3	pyruvate dehydrogenase kinase 3
ENSG00000068001	-1.11815	0.00173219	0.0297884	HYAL2	hyaluronidase 2
ENSG00000068024	0.154	0.539668	0.761336	HDAC4	histone deacetylase 4
ENSG00000068028	-0.449949	0.152734	0.38878	RASSF1	Ras association domain family member 1
ENSG00000068078	-0.025239	0.959934	0.98513	FGFR3	fibroblast growth factor receptor 3
ENSG00000068079	-0.0839014	0.826343	0.925004	IFI35	interferon induced protein 35
ENSG00000068097	0.701716	0.0179777	0.109765	HEATR6	HEAT repeat containing 6
ENSG00000068120	0.0682684	0.883405	0.950431	COASY	Coenzyme A synthase
ENSG00000068137	1.01268	0.00394988	0.0470256	PLEKHH3	pleckstrin homology, MyTH4 and FERM domain containing H3
ENSG00000068305	-0.13924	0.589287	0.793837	MEF2A	myocyte enhancer factor 2A
ENSG00000068308	-0.144904	0.616852	0.813017	OTUD5	OTU deubiquitinase 5
ENSG00000068323	-0.621622	0.0805036	0.266567	TFE3	transcription factor binding to IGHM enhancer 3
ENSG00000068354	-0.650575	0.00558387	0.0572102	TBC1D25	TBC1 domain family member 25
ENSG00000068366	0.00966291	0.974689	0.990761	ACSL4	acyl-CoA synthetase long chain family member 4
ENSG00000068383	-0.474724	0.0880146	0.281432	INPP5A	inositol polyphosphate-5-phosphatase A
ENSG00000068394	0.0129504	0.968842	0.988524	GPKOW	G-patch domain and KOW motifs
ENSG00000068400	0.496517	0.0357373	0.164438	GRIPAP1	GRIP1 associated protein 1
ENSG00000068438	-0.543486	0.0232484	0.127547	FTSJ1	FtsJ RNA methyltransferase homolog 1
ENSG00000068489	-0.233981	0.309908	0.571837	PRR11	proline rich 11
ENSG00000068615	0.0202066	0.927639	0.970812	REEP1	receptor accessory protein 1
ENSG00000068650	-0.142734	0.642177	0.829038	ATP11A	ATPase phospholipid transporting 11A
ENSG00000068654	0.840644	0.0138753	0.0952431	POLR1A	RNA polymerase I subunit A
ENSG00000068697	-0.218859	0.295103	0.558116	LAPTM4A	lysosomal protein transmembrane 4 alpha
ENSG00000068724	-0.318113	0.463802	0.707996	TTC7A	tetratricopeptide repeat domain 7A
ENSG00000068745	-0.343995	0.148267	0.381711	IP6K2	inositol hexakisphosphate kinase 2
ENSG00000068781	0.060672	0.891458	NA	STON1-GTF2A1L	STON1-GTF2A1L readthrough
ENSG00000068784	0.12322	0.708959	0.865043	SRBD1	S1 RNA binding domain 1
ENSG00000068796	0.32235	0.3777	0.635764	KIF2A	kinesin family member 2A
ENSG00000068831	-0.649256	0.0357202	0.164427	RASGRP2	RAS guanyl releasing protein 2
ENSG00000068878	0.0801224	0.71285	0.867374	PSME4	proteasome activator subunit 4
ENSG00000068885	0.874408	0.000575342	0.0158806	IFT80	intraflagellar transport 80
ENSG00000068903	-0.0915729	0.757396	0.892199	SIRT2	sirtuin 2
ENSG00000068912	-0.17829	0.477071	0.717912	ERLEC1	endoplasmic reticulum lectin 1
ENSG00000068971	-0.626535	0.0637957	0.233046	PPP2R5B	protein phosphatase 2 regulatory subunit B'beta
ENSG00000068976	-0.987474	0.00024504	0.00965885	PYGM	glycogen phosphorylase, muscle associated
ENSG00000069011	-0.464103	0.145833	0.377767	PITX1	paired like homeodomain 1
ENSG00000069020	-0.29577	0.149826	0.384424	MAST4	microtubule associated serine/threonine kinase family member 4
ENSG00000069122	-0.822612	0.000245572	0.00966266	ADGRF5	adhesion G protein-coupled receptor F5
ENSG00000069188	0.760763	0.0277987	0.142303	SDK2	sidekick cell adhesion molecule 2
ENSG00000069206	-0.0061996	0.985673	NA	ADAM7	ADAM metallopeptidase domain 7
ENSG00000069248	-0.0409541	0.837382	0.930679	NUP133	nucleoporin 133
ENSG00000069275	-0.338579	0.172424	0.417064	NUCKS1	nuclear casein kinase and cyclin dependent kinase substrate 1
ENSG00000069329	0.0733285	0.599859	0.801155	VPS35	VPS35, retromer complex component
ENSG00000069345	-0.273908	0.182182	0.430243	DNAJA2	DnaJ heat shock protein family (Hsp40) member A2
ENSG00000069399	-1.60632	4.44799e-08	2.66783e-05	BCL3	B cell CLL/lymphoma 3
ENSG00000069424	-0.144168	0.720229	0.871005	KCNAB2	potassium voltage-gated channel subfamily A regulatory beta subunit 2
ENSG00000069431	-0.186373	0.286646	0.550062	ABCC9	ATP binding cassette subfamily C member 9
ENSG00000069493	0.196217	0.374824	0.633036	CLEC2D	C-type lectin domain family 2 member D
ENSG00000069509	-0.138814	0.553644	0.771408	FUNDC1	FUN14 domain containing 1
ENSG00000069535	-0.452169	0.070127	0.245551	MAOB	monoamine oxidase B
ENSG00000069667	0.340819	0.167149	0.409962	RORA	RAR related orphan receptor A
ENSG00000069696	0.141808	0.64935	NA	DRD4	dopamine receptor D4
ENSG00000069702	-0.933188	7.03907e-05	0.00482133	TGFBR3	transforming growth factor beta receptor 3
ENSG00000069712	0.624118	0.191646	0.442515	NA	NA
ENSG00000069764	0.787991	0.104265	NA	PLA2G10	phospholipase A2 group X
ENSG00000069812	0.501229	0.115825	0.328323	HES2	hes family bHLH transcription factor 2
ENSG00000069849	-0.588603	0.00810468	0.0698437	ATP1B3	ATPase Na+/K+ transporting subunit beta 3
ENSG00000069869	0.777628	0.0139304	0.0955163	NEDD4	neural precursor cell expressed, developmentally down-regulated 4, E3 ubiquitin protein ligase
ENSG00000069943	0.248868	0.0740577	0.253468	PIGB	phosphatidylinositol glycan anchor biosynthesis class B
ENSG00000069956	-0.302921	0.154192	0.391291	MAPK6	mitogen-activated protein kinase 6
ENSG00000069966	0.225967	0.38453	0.641585	GNB5	G protein subunit beta 5
ENSG00000069974	0.357015	0.18517	0.434603	RAB27A	RAB27A, member RAS oncogene family
ENSG00000069998	-0.406171	0.221882	0.479996	HDHD5	haloacid dehalogenase like hydrolase domain containing 5
ENSG00000070010	-0.189004	0.294829	0.558025	UFD1	ubiquitin recognition factor in ER associated degradation 1
ENSG00000070018	0.293253	0.312817	0.574547	LRP6	LDL receptor related protein 6
ENSG00000070019	0.0718451	0.887662	NA	GUCY2C	guanylate cyclase 2C
ENSG00000070047	-0.313297	0.471403	0.713258	PHRF1	PHD and ring finger domains 1
ENSG00000070061	0.275567	0.215386	0.472456	ELP1	elongator complex protein 1
ENSG00000070081	0.232753	0.275384	0.538503	NUCB2	nucleobindin 2
ENSG00000070087	-0.424417	0.0802681	0.266066	PFN2	profilin 2
ENSG00000070159	0.121931	0.728736	0.876504	PTPN3	protein tyrosine phosphatase, non-receptor type 3
ENSG00000070182	-0.138991	0.532617	0.75773	SPTB	spectrin beta, erythrocytic
ENSG00000070190	0.787859	0.0710554	0.247506	DAPP1	dual adaptor of phosphotyrosine and 3-phosphoinositides 1
ENSG00000070193	-0.290564	0.521136	NA	FGF10	fibroblast growth factor 10
ENSG00000070214	-0.109119	0.722615	0.872627	SLC44A1	solute carrier family 44 member 1
ENSG00000070269	0.101418	0.777462	0.902147	TMEM260	transmembrane protein 260
ENSG00000070366	-0.102751	0.791508	0.908831	SMG6	SMG6, nonsense mediated mRNA decay factor
ENSG00000070367	0.138223	0.522476	0.750571	EXOC5	exocyst complex component 5
ENSG00000070371	0.0148524	0.97632	0.991504	CLTCL1	clathrin heavy chain like 1
ENSG00000070388	0.860858	0.0220819	0.123977	FGF22	fibroblast growth factor 22
ENSG00000070404	-0.389045	0.359051	0.619168	FSTL3	follistatin like 3
ENSG00000070413	-0.530551	0.0596244	0.224285	DGCR2	DiGeorge syndrome critical region gene 2
ENSG00000070423	-0.63009	0.0806928	0.266977	RNF126	ring finger protein 126
ENSG00000070444	0.473145	0.0489006	0.198355	MNT	MAX network transcriptional repressor
ENSG00000070476	0.108878	0.786969	0.907339	ZXDC	ZXD family zinc finger C
ENSG00000070495	0.0181509	0.946765	0.979765	JMJD6	jumonji domain containing 6, arginine demethylase and lysine hydroxylase
ENSG00000070501	0.146033	0.535562	0.75934	POLB	DNA polymerase beta
ENSG00000070526	-0.435649	0.320211	0.582136	ST6GALNAC1	ST6 N-acetylgalactosaminide alpha-2,6-sialyltransferase 1
ENSG00000070540	0.175442	0.469294	0.711736	WIPI1	WD repeat domain, phosphoinositide interacting 1
ENSG00000070601	0.513656	0.241608	0.502433	FRMPD1	FERM and PDZ domain containing 1
ENSG00000070610	-0.0232362	0.942804	0.977383	GBA2	glucosylceramidase beta 2
ENSG00000070614	-0.455368	0.0907377	0.286007	NDST1	N-deacetylase and N-sulfotransferase 1
ENSG00000070669	0.132878	0.659647	0.839837	ASNS	asparagine synthetase (glutamine-hydrolyzing)
ENSG00000070718	0.173313	0.516439	0.746682	AP3M2	adaptor related protein complex 3 subunit mu 2
ENSG00000070729	0.370191	0.384702	0.641662	CNGB1	cyclic nucleotide gated channel beta 1
ENSG00000070731	-0.361022	0.115525	0.327842	ST6GALNAC2	ST6 N-acetylgalactosaminide alpha-2,6-sialyltransferase 2
ENSG00000070748	0.0566406	0.820082	NA	CHAT	choline O-acetyltransferase
ENSG00000070756	-0.38835	0.0229566	0.126765	PABPC1	poly(A) binding protein cytoplasmic 1
ENSG00000070759	0.0141507	0.977847	NA	TESK2	testis associated actin remodelling kinase 2
ENSG00000070761	-0.379212	0.0404113	0.177656	CFAP20	cilia and flagella associated protein 20
ENSG00000070770	-0.306157	0.0662063	0.238128	CSNK2A2	casein kinase 2 alpha 2
ENSG00000070778	0.433304	0.0610202	0.22717	PTPN21	protein tyrosine phosphatase, non-receptor type 21
ENSG00000070785	-0.279296	0.324143	0.586162	EIF2B3	eukaryotic translation initiation factor 2B subunit gamma
ENSG00000070808	-0.249105	0.322646	0.584693	CAMK2A	calcium/calmodulin dependent protein kinase II alpha
ENSG00000070814	0.0553195	0.812822	0.919516	TCOF1	treacle ribosome biogenesis factor 1
ENSG00000070831	-0.449835	0.00473067	0.0518435	CDC42	cell division cycle 42
ENSG00000070882	-0.1006	0.802413	0.914876	OSBPL3	oxysterol binding protein like 3
ENSG00000070886	0.00271248	0.99131	NA	EPHA8	EPH receptor A8
ENSG00000070915	1.08708	0.018703	0.112178	SLC12A3	solute carrier family 12 member 3
ENSG00000070950	0.386344	0.405188	0.65962	RAD18	RAD18, E3 ubiquitin protein ligase
ENSG00000070961	0.370741	0.198599	0.451461	ATP2B1	ATPase plasma membrane Ca2+ transporting 1
ENSG00000071051	-0.936852	0.000790203	0.0192695	NCK2	NCK adaptor protein 2
ENSG00000071054	-0.210401	0.3748	0.633036	MAP4K4	mitogen-activated protein kinase kinase kinase kinase 4
ENSG00000071073	0.263221	0.284065	0.546888	MGAT4A	alpha-1,3-mannosyl-glycoprotein 4-beta-N-acetylglucosaminyltransferase A
ENSG00000071082	0.0465907	0.883049	0.950231	RPL31	ribosomal protein L31
ENSG00000071127	-0.616383	0.0100966	0.0799658	WDR1	WD repeat domain 1
ENSG00000071189	-0.0861635	0.729629	0.87688	SNX13	sorting nexin 13
ENSG00000071203	0.0591064	0.812399	NA	MS4A12	membrane spanning 4-domains A12
ENSG00000071205	-0.616714	0.00291366	0.0398381	ARHGAP10	Rho GTPase activating protein 10
ENSG00000071242	-0.536681	0.0127412	0.0910115	RPS6KA2	ribosomal protein S6 kinase A2
ENSG00000071243	0.0175298	0.961246	0.985714	ING3	inhibitor of growth family member 3
ENSG00000071246	-0.460302	0.092794	0.289551	VASH1	vasohibin 1
ENSG00000071282	-0.823086	0.019109	0.113613	LMCD1	LIM and cysteine rich domains 1
ENSG00000071462	-0.153767	0.535452	0.759326	BUD23	BUD23, rRNA methyltransferase and ribosome maturation factor
ENSG00000071537	-0.101223	0.653508	0.836177	SEL1L	SEL1L, ERAD E3 ligase adaptor subunit
ENSG00000071539	1.57199	0.000358065	0.0120998	TRIP13	thyroid hormone receptor interactor 13
ENSG00000071553	-0.405152	0.114468	0.326304	ATP6AP1	ATPase H+ transporting accessory protein 1
ENSG00000071564	-0.423992	0.198141	0.45118	TCF3	transcription factor 3
ENSG00000071575	-0.513373	0.0211074	0.120644	TRIB2	tribbles pseudokinase 2
ENSG00000071626	-0.53276	0.0569305	0.217918	DAZAP1	DAZ associated protein 1
ENSG00000071655	-0.360876	0.288371	0.551673	MBD3	methyl-CpG binding domain protein 3
ENSG00000071677	0.0547577	0.825961	NA	PRLH	prolactin releasing hormone
ENSG00000071794	0.258489	0.373549	0.6317	HLTF	helicase like transcription factor
ENSG00000071859	-0.232791	0.43367	0.683841	FAM50A	family with sequence similarity 50 member A
ENSG00000071889	-0.147764	0.543082	0.763659	FAM3A	family with sequence similarity 3 member A
ENSG00000071894	-0.529081	0.0167249	0.104877	CPSF1	cleavage and polyadenylation specific factor 1
ENSG00000071909	1.17018	0.000817415	0.0195074	MYO3B	myosin IIIB
ENSG00000071967	0.0180554	0.959096	0.984748	CYBRD1	cytochrome b reductase 1
ENSG00000071991	-0.351322	0.335732	0.597511	CDH19	cadherin 19
ENSG00000071994	0.128445	0.535904	0.759533	PDCD2	programmed cell death 2
ENSG00000072041	0.227884	0.613481	NA	SLC6A15	solute carrier family 6 member 15
ENSG00000072042	-0.0375898	0.911777	0.963824	RDH11	retinol dehydrogenase 11
ENSG00000072062	-0.738007	0.000178494	0.00803478	PRKACA	protein kinase cAMP-activated catalytic subunit alpha
ENSG00000072071	-0.459614	0.250853	0.512735	ADGRL1	adhesion G protein-coupled receptor L1
ENSG00000072080	0.578875	0.154564	0.391651	SPP2	secreted phosphoprotein 2
ENSG00000072110	-0.0557066	0.830259	0.926351	ACTN1	actinin alpha 1
ENSG00000072121	0.515609	0.0266885	0.138478	ZFYVE26	zinc finger FYVE-type containing 26
ENSG00000072133	-0.150292	0.60181	0.802847	RPS6KA6	ribosomal protein S6 kinase A6
ENSG00000072134	-0.382657	0.231497	0.490626	EPN2	epsin 2
ENSG00000072135	-0.731453	0.00361714	0.0448939	PTPN18	protein tyrosine phosphatase, non-receptor type 18
ENSG00000072163	-0.62717	0.0436666	0.185342	LIMS2	LIM zinc finger domain containing 2
ENSG00000072182	0.420564	0.197655	0.450702	ASIC4	acid sensing ion channel subunit family member 4
ENSG00000072195	-0.142366	0.545293	0.765459	SPEG	SPEG complex locus
ENSG00000072201	-0.764581	0.0100507	0.0798014	LNX1	ligand of numb-protein X 1
ENSG00000072210	-0.00287827	0.989169	0.99707	ALDH3A2	aldehyde dehydrogenase 3 family member A2
ENSG00000072274	-0.00106934	0.996625	0.999238	TFRC	transferrin receptor
ENSG00000072310	-0.584198	0.0795432	0.264673	SREBF1	sterol regulatory element binding transcription factor 1
ENSG00000072315	0.280464	0.524101	NA	TRPC5	transient receptor potential cation channel subfamily C member 5
ENSG00000072364	0.162966	0.348444	0.608489	AFF4	AF4/FMR2 family member 4
ENSG00000072401	0.103638	0.747686	0.886975	UBE2D1	ubiquitin conjugating enzyme E2 D1
ENSG00000072415	0.182298	0.412491	0.666084	MPP5	membrane palmitoylated protein 5
ENSG00000072422	0.19856	0.50615	0.739612	RHOBTB1	Rho related BTB domain containing 1
ENSG00000072501	-0.144207	0.58528	0.790778	SMC1A	structural maintenance of chromosomes 1A
ENSG00000072506	-0.410579	0.167652	0.410609	HSD17B10	hydroxysteroid 17-beta dehydrogenase 10
ENSG00000072518	-0.801548	0.0464505	0.192787	MARK2	microtubule affinity regulating kinase 2
ENSG00000072571	-0.451251	0.366673	NA	HMMR	hyaluronan mediated motility receptor
ENSG00000072609	0.794948	0.00774707	0.0677662	CHFR	checkpoint with forkhead and ring finger domains
ENSG00000072657	0.653642	0.188743	0.438765	TRHDE	thyrotropin releasing hormone degrading enzyme
ENSG00000072682	0.0125162	0.956882	0.984181	P4HA2	prolyl 4-hydroxylase subunit alpha 2
ENSG00000072694	-0.87794	0.0586791	0.221917	FCGR2B	Fc fragment of IgG receptor IIb
ENSG00000072736	-0.324026	0.428627	0.680287	NFATC3	nuclear factor of activated T cells 3
ENSG00000072756	0.733337	0.00238804	0.0356631	TRNT1	tRNA nucleotidyl transferase 1
ENSG00000072778	-0.781796	0.0035221	0.0442684	ACADVL	acyl-CoA dehydrogenase very long chain
ENSG00000072786	0.344946	0.301734	0.564093	STK10	serine/threonine kinase 10
ENSG00000072803	0.132514	0.621073	0.815982	FBXW11	F-box and WD repeat domain containing 11
ENSG00000072818	0.475643	0.11957	0.334827	ACAP1	ArfGAP with coiled-coil, ankyrin repeat and PH domains 1
ENSG00000072832	-0.0260251	0.957132	0.984181	CRMP1	collapsin response mediator protein 1
ENSG00000072840	0.572433	0.253352	0.515768	EVC	EvC ciliary complex subunit 1
ENSG00000072849	-0.102013	0.69331	0.857975	DERL2	derlin 2
ENSG00000072858	0.851229	0.016449	0.104027	SIDT1	SID1 transmembrane family member 1
ENSG00000072864	0.183229	0.513205	0.744537	NDE1	nudE neurodevelopment protein 1
ENSG00000072952	-0.326328	0.339763	0.600942	MRVI1	murine retrovirus integration site 1 homolog
ENSG00000072954	-0.456666	0.14627	0.378368	TMEM38A	transmembrane protein 38A
ENSG00000072958	0.0059097	0.964942	0.987068	AP1M1	adaptor related protein complex 1 subunit mu 1
ENSG00000073008	-1.03845	0.00337542	0.0433552	PVR	poliovirus receptor
ENSG00000073050	0.579961	0.11523	0.327477	XRCC1	X-ray repair cross complementing 1
ENSG00000073060	0.073232	0.812421	0.919344	SCARB1	scavenger receptor class B member 1
ENSG00000073067	0.716243	0.118592	0.332927	CYP2W1	cytochrome P450 family 2 subfamily W member 1
ENSG00000073111	-0.370976	0.19193	0.442849	MCM2	minichromosome maintenance complex component 2
ENSG00000073146	0.769816	0.0399958	0.176529	MOV10L1	Mov10 like RISC complex RNA helicase 1
ENSG00000073150	0.112329	0.697129	NA	PANX2	pannexin 2
ENSG00000073169	-0.837356	0.0156393	0.101363	SELENOO	selenoprotein O
ENSG00000073282	0.625753	0.218291	0.476194	TP63	tumor protein p63
ENSG00000073331	0.360538	0.186365	0.436089	ALPK1	alpha kinase 1
ENSG00000073350	0.392003	0.365846	0.624864	LLGL2	LLGL2, scribble cell polarity complex component
ENSG00000073417	0.434125	0.0947197	0.292883	PDE8A	phosphodiesterase 8A
ENSG00000073464	-0.201116	0.432796	0.683213	CLCN4	chloride voltage-gated channel 4
ENSG00000073536	0.0218583	0.961284	0.985714	NLE1	notchless homolog 1
ENSG00000073578	-0.496487	0.0484787	0.197408	SDHA	succinate dehydrogenase complex flavoprotein subunit A
ENSG00000073584	-0.0535069	0.766253	0.896919	SMARCE1	SWI/SNF related, matrix associated, actin dependent regulator of chromatin, subfamily e, member 1
ENSG00000073605	0.216743	0.489956	0.727031	GSDMB	gasdermin B
ENSG00000073614	0.271514	0.257709	0.520471	KDM5A	lysine demethylase 5A
ENSG00000073670	-0.656226	0.197776	0.45083	ADAM11	ADAM metallopeptidase domain 11
ENSG00000073711	-0.367807	0.0985276	0.299647	PPP2R3A	protein phosphatase 2 regulatory subunit B''alpha
ENSG00000073712	-0.404509	0.014193	0.096397	FERMT2	fermitin family member 2
ENSG00000073734	0.0579048	0.816141	NA	ABCB11	ATP binding cassette subfamily B member 11
ENSG00000073737	0.359866	0.469181	0.711645	DHRS9	dehydrogenase/reductase 9
ENSG00000073754	-0.340658	0.401005	NA	CD5L	CD5 molecule like
ENSG00000073756	-0.0337846	0.93032	NA	PTGS2	prostaglandin-endoperoxide synthase 2
ENSG00000073792	0.173799	0.686005	0.854121	IGF2BP2	insulin like growth factor 2 mRNA binding protein 2
ENSG00000073803	-0.0527555	0.820215	0.922331	MAP3K13	mitogen-activated protein kinase kinase kinase 13
ENSG00000073849	-0.161088	0.496408	0.73198	ST6GAL1	ST6 beta-galactoside alpha-2,6-sialyltransferase 1
ENSG00000073861	-0.040664	0.870316	NA	TBX21	T-box 21
ENSG00000073905	0.273113	0.589624	0.794134	NA	NA
ENSG00000073910	0.296397	0.34233	0.602949	FRY	FRY microtubule binding protein
ENSG00000073921	-0.324763	0.249624	0.511417	PICALM	phosphatidylinositol binding clathrin assembly protein
ENSG00000073969	0.314844	0.434851	0.684759	NSF	N-ethylmaleimide sensitive factor, vesicle fusing ATPase
ENSG00000074047	0.68277	0.165365	0.407256	GLI2	GLI family zinc finger 2
ENSG00000074054	-0.155584	0.442235	0.690725	CLASP1	cytoplasmic linker associated protein 1
ENSG00000074071	-0.344204	0.376586	0.634708	MRPS34	mitochondrial ribosomal protein S34
ENSG00000074181	-1.10012	3.4805e-07	0.000126622	NOTCH3	notch 3
ENSG00000074201	-0.137464	0.515609	0.746017	CLNS1A	chloride nucleotide-sensitive channel 1A
ENSG00000074211	0.661927	0.122858	0.339917	PPP2R2C	protein phosphatase 2 regulatory subunit Bgamma
ENSG00000074219	-0.937478	0.000179422	0.0080439	TEAD2	TEA domain transcription factor 2
ENSG00000074266	0.196041	0.527029	0.753596	EED	embryonic ectoderm development
ENSG00000074276	0.0157317	0.94964	NA	CDHR2	cadherin related family member 2
ENSG00000074317	0.0591064	0.812399	NA	SNCB	synuclein beta
ENSG00000074319	-0.201788	0.288172	0.551595	TSG101	tumor susceptibility 101
ENSG00000074356	0.316892	0.107685	0.315104	NCBP3	nuclear cap binding subunit 3
ENSG00000074370	-0.835739	0.0761406	0.258129	ATP2A3	ATPase sarcoplasmic/endoplasmic reticulum Ca2+ transporting 3
ENSG00000074410	0.804097	0.0857765	0.277004	CA12	carbonic anhydrase 12
ENSG00000074416	-0.555224	0.00737313	0.0657391	MGLL	monoglyceride lipase
ENSG00000074527	-0.443237	0.122575	0.339737	NTN4	netrin 4
ENSG00000074582	-0.307788	0.316392	0.578175	BCS1L	BCS1 homolog, ubiquinol-cytochrome c reductase complex chaperone
ENSG00000074590	-0.237441	0.417671	0.671079	NUAK1	NUAK family kinase 1
ENSG00000074603	-0.373478	0.0123256	0.0893594	DPP8	dipeptidyl peptidase 8
ENSG00000074621	0.251692	0.471333	0.713254	SLC24A1	solute carrier family 24 member 1
ENSG00000074657	-0.135462	0.470047	0.712225	ZNF532	zinc finger protein 532
ENSG00000074660	0.443983	0.2274	0.486396	SCARF1	scavenger receptor class F member 1
ENSG00000074695	-0.439673	0.083717	0.272612	LMAN1	lectin, mannose binding 1
ENSG00000074696	-0.0636875	0.788506	0.907997	HACD3	3-hydroxyacyl-CoA dehydratase 3
ENSG00000074706	0.0522696	0.891218	0.95375	IPCEF1	interaction protein for cytohesin exchange factors 1
ENSG00000074755	0.305596	0.239295	0.499947	ZZEF1	zinc finger ZZ-type and EF-hand domain containing 1
ENSG00000074771	0.0547577	0.825961	NA	NOX3	NADPH oxidase 3
ENSG00000074800	-0.895819	0.00114357	0.0238069	ENO1	enolase 1
ENSG00000074803	0.208458	0.670627	NA	SLC12A1	solute carrier family 12 member 1
ENSG00000074842	-0.419273	0.165987	0.408241	MYDGF	myeloid derived growth factor
ENSG00000074855	0.56187	0.132584	0.356836	ANO8	anoctamin 8
ENSG00000074935	0.953076	0.00141192	0.026464	TUBE1	tubulin epsilon 1
ENSG00000074964	-0.621023	0.0108338	0.083249	ARHGEF10L	Rho guanine nucleotide exchange factor 10 like
ENSG00000074966	0.688453	0.139091	0.367589	TXK	TXK tyrosine kinase
ENSG00000075035	-0.0850746	0.867026	NA	WSCD2	WSC domain containing 2
ENSG00000075043	0.112697	0.764693	NA	KCNQ2	potassium voltage-gated channel subfamily Q member 2
ENSG00000075073	0.946967	0.0451485	0.18939	TACR2	tachykinin receptor 2
ENSG00000075089	0.806487	0.00683246	0.0633094	ACTR6	ARP6 actin related protein 6 homolog
ENSG00000075131	0.245413	0.397298	0.653772	TIPIN	TIMELESS interacting protein
ENSG00000075142	-0.255015	0.253071	0.515479	SRI	sorcin
ENSG00000075151	-0.0266338	0.913108	0.964754	EIF4G3	eukaryotic translation initiation factor 4 gamma 3
ENSG00000075188	0.24388	0.405574	0.65996	NUP37	nucleoporin 37
ENSG00000075213	-0.393917	0.314615	0.576525	SEMA3A	semaphorin 3A
ENSG00000075218	0.718269	0.0626882	0.231	GTSE1	G2 and S-phase expressed 1
ENSG00000075223	0.0320038	0.901818	0.958622	SEMA3C	semaphorin 3C
ENSG00000075234	-0.0290104	0.915714	0.965852	TTC38	tetratricopeptide repeat domain 38
ENSG00000075239	0.0770064	0.760161	0.89389	ACAT1	acetyl-CoA acetyltransferase 1
ENSG00000075240	-0.442919	0.123415	0.340524	GRAMD4	GRAM domain containing 4
ENSG00000075275	0.315707	0.333903	0.595896	CELSR1	cadherin EGF LAG seven-pass G-type receptor 1
ENSG00000075292	0.283776	0.183025	0.431359	ZNF638	zinc finger protein 638
ENSG00000075303	0.227887	0.417653	0.671079	SLC25A40	solute carrier family 25 member 40
ENSG00000075336	-0.00953809	0.973885	0.990579	TIMM21	translocase of inner mitochondrial membrane 21
ENSG00000075340	-0.127755	0.688608	0.855776	ADD2	adducin 2
ENSG00000075391	-0.0238007	0.895771	0.955567	RASAL2	RAS protein activator like 2
ENSG00000075399	-0.480928	0.164613	0.406081	VPS9D1	VPS9 domain containing 1
ENSG00000075407	0.533401	0.0170398	0.105983	ZNF37A	zinc finger protein 37A
ENSG00000075413	-0.223767	0.250696	0.512707	MARK3	microtubule affinity regulating kinase 3
ENSG00000075415	-0.35152	0.14321	0.373413	SLC25A3	solute carrier family 25 member 3
ENSG00000075420	0.104894	0.585819	0.791079	FNDC3B	fibronectin type III domain containing 3B
ENSG00000075426	-0.88953	2.37126e-05	0.00239195	FOSL2	FOS like 2, AP-1 transcription factor subunit
ENSG00000075461	0.0686394	0.782873	NA	CACNG4	calcium voltage-gated channel auxiliary subunit gamma 4
ENSG00000075539	-0.0225434	0.922886	0.968857	FRYL	FRY like transcription coactivator
ENSG00000075568	0.0965029	0.70438	0.863056	TMEM131	transmembrane protein 131
ENSG00000075618	-0.329692	0.292346	0.556108	FSCN1	fascin actin-bundling protein 1
ENSG00000075624	-0.829383	2.38824e-06	0.000535352	ACTB	actin beta
ENSG00000075643	0.542157	0.11552	0.327842	MOCOS	molybdenum cofactor sulfurase
ENSG00000075651	-0.0333252	0.86713	0.943903	PLD1	phospholipase D1
ENSG00000075702	0.740361	0.0502316	0.201799	WDR62	WD repeat domain 62
ENSG00000075711	-0.0860004	0.701574	0.86245	DLG1	discs large MAGUK scaffold protein 1
ENSG00000075785	-0.308353	0.182335	0.430488	RAB7A	RAB7A, member RAS oncogene family
ENSG00000075790	-0.255925	0.172333	0.416932	BCAP29	B cell receptor associated protein 29
ENSG00000075826	1.16715	0.00718887	0.0649839	SEC31B	SEC31 homolog B, COPII coat complex component
ENSG00000075856	-0.225808	0.250809	0.512707	SART3	spliceosome associated factor 3, U4/U6 recycling protein
ENSG00000075884	1.11266	0.00174861	0.0299346	ARHGAP15	Rho GTPase activating protein 15
ENSG00000075886	-2.20892	7.00445e-07	0.000210058	TUBA3D	tubulin alpha 3d
ENSG00000075891	0.0547577	0.825961	NA	PAX2	paired box 2
ENSG00000075914	-0.0385949	0.852479	0.937427	EXOSC7	exosome component 7
ENSG00000075945	0.533746	0.0521192	0.206688	KIFAP3	kinesin associated protein 3
ENSG00000075975	-0.114434	0.544053	0.764443	MKRN2	makorin ring finger protein 2
ENSG00000076003	-0.0872791	0.834973	0.929321	MCM6	minichromosome maintenance complex component 6
ENSG00000076043	0.0275205	0.897543	0.956598	REXO2	RNA exonuclease 2
ENSG00000076053	0.496722	0.0474749	0.195358	RBM7	RNA binding motif protein 7
ENSG00000076067	0.15907	0.424473	0.67735	RBMS2	RNA binding motif single stranded interacting protein 2
ENSG00000076108	-0.334203	0.146431	0.378477	BAZ2A	bromodomain adjacent to zinc finger domain 2A
ENSG00000076201	-0.590894	0.105663	0.311639	PTPN23	protein tyrosine phosphatase, non-receptor type 23
ENSG00000076242	-0.073792	0.751122	0.889197	MLH1	mutL homolog 1
ENSG00000076248	-0.307264	0.244087	0.505061	UNG	uracil DNA glycosylase
ENSG00000076258	-0.22445	0.418254	0.67158	FMO4	flavin containing monooxygenase 4
ENSG00000076321	-0.298773	0.12943	0.351526	KLHL20	kelch like family member 20
ENSG00000076344	0.614802	0.0886973	0.282529	RGS11	regulator of G protein signaling 11
ENSG00000076351	0.217275	0.508541	0.741202	SLC46A1	solute carrier family 46 member 1
ENSG00000076356	0.0770559	0.813709	0.920097	PLXNA2	plexin A2
ENSG00000076382	0.333156	0.477928	NA	SPAG5	sperm associated antigen 5
ENSG00000076513	0.219183	0.379962	0.637734	ANKRD13A	ankyrin repeat domain 13A
ENSG00000076554	0.0146824	0.947854	0.980117	TPD52	tumor protein D52
ENSG00000076555	-0.0980902	0.691161	0.857124	ACACB	acetyl-CoA carboxylase beta
ENSG00000076604	-0.14824	0.770542	NA	TRAF4	TNF receptor associated factor 4
ENSG00000076641	-0.538043	0.0172175	0.10664	PAG1	phosphoprotein membrane anchor with glycosphingolipid microdomains 1
ENSG00000076650	0.421042	0.0959067	0.294647	GPATCH1	G-patch domain containing 1
ENSG00000076662	-0.40753	0.381077	0.638832	ICAM3	intercellular adhesion molecule 3
ENSG00000076685	0.303541	0.165912	0.408149	NT5C2	5'-nucleotidase, cytosolic II
ENSG00000076706	-0.128898	0.5779	0.786408	MCAM	melanoma cell adhesion molecule
ENSG00000076716	-0.519868	0.111792	0.322194	GPC4	glypican 4
ENSG00000076770	-0.629502	0.18648	0.436195	MBNL3	muscleblind like splicing regulator 3
ENSG00000076826	0.118997	0.757515	NA	CAMSAP3	calmodulin regulated spectrin associated protein family member 3
ENSG00000076864	-0.348671	0.492866	NA	RAP1GAP	RAP1 GTPase activating protein
ENSG00000076924	-0.603341	0.193231	0.444707	XAB2	XPA binding protein 2
ENSG00000076928	0.133166	0.689274	0.856268	ARHGEF1	Rho guanine nucleotide exchange factor 1
ENSG00000076944	0.413279	0.416075	NA	STXBP2	syntaxin binding protein 2
ENSG00000076984	-0.402061	0.0580888	0.220587	MAP2K7	mitogen-activated protein kinase kinase 7
ENSG00000077009	-0.202225	0.597016	0.79919	NMRK2	nicotinamide riboside kinase 2
ENSG00000077044	-0.209529	0.317282	0.578944	DGKD	diacylglycerol kinase delta
ENSG00000077063	-0.0823073	0.87139	NA	CTTNBP2	cortactin binding protein 2
ENSG00000077080	0.0591064	0.812399	NA	ACTL6B	actin like 6B
ENSG00000077092	-0.21225	0.425423	0.678015	RARB	retinoic acid receptor beta
ENSG00000077097	-0.240681	0.284025	0.546884	TOP2B	DNA topoisomerase II beta
ENSG00000077147	-0.23721	0.20174	0.45526	TM9SF3	transmembrane 9 superfamily member 3
ENSG00000077150	-0.0563717	0.865114	0.942985	NFKB2	nuclear factor kappa B subunit 2
ENSG00000077152	-0.0153966	0.967135	0.987825	UBE2T	ubiquitin conjugating enzyme E2 T
ENSG00000077157	-0.431254	0.0701524	0.245594	PPP1R12B	protein phosphatase 1 regulatory subunit 12B
ENSG00000077232	0.415928	0.0154924	0.100853	DNAJC10	DnaJ heat shock protein family (Hsp40) member C10
ENSG00000077235	0.0672363	0.811506	0.919292	GTF3C1	general transcription factor IIIC subunit 1
ENSG00000077238	0.343493	0.397819	0.654198	IL4R	interleukin 4 receptor
ENSG00000077254	0.583754	0.00171217	0.0296301	USP33	ubiquitin specific peptidase 33
ENSG00000077264	0.95584	0.00889237	0.0737717	PAK3	p21 (RAC1) activated kinase 3
ENSG00000077274	-0.0153086	0.969779	NA	CAPN6	calpain 6
ENSG00000077279	1.30655	0.00125629	0.0250733	DCX	doublecortin
ENSG00000077312	-0.293666	0.388909	0.645896	SNRPA	small nuclear ribonucleoprotein polypeptide A
ENSG00000077327	0.0730191	0.7707	NA	SPAG6	sperm associated antigen 6
ENSG00000077348	-0.22282	0.577785	0.786348	EXOSC5	exosome component 5
ENSG00000077380	-0.39289	0.0349213	0.162115	DYNC1I2	dynein cytoplasmic 1 intermediate chain 2
ENSG00000077420	-0.399936	0.376864	0.634936	APBB1IP	amyloid beta precursor protein binding family B member 1 interacting protein
ENSG00000077454	1.41494	0.000214213	0.00899276	LRCH4	leucine rich repeats and calponin homology domain containing 4
ENSG00000077458	0.0342661	0.916747	0.966391	FAM76B	family with sequence similarity 76 member B
ENSG00000077463	-0.221381	0.616479	0.812839	SIRT6	sirtuin 6
ENSG00000077498	0.719278	0.150886	NA	TYR	tyrosinase
ENSG00000077514	1.82383	7.26889e-05	0.00488822	POLD3	DNA polymerase delta 3, accessory subunit
ENSG00000077522	-0.156022	0.515488	0.746017	ACTN2	actinin alpha 2
ENSG00000077549	-0.826394	3.68282e-08	2.45995e-05	CAPZB	capping actin protein of muscle Z-line subunit beta
ENSG00000077585	-0.0147277	0.945666	0.979065	GPR137B	G protein-coupled receptor 137B
ENSG00000077616	0.398662	0.398946	0.655225	NAALAD2	N-acetylated alpha-linked acidic dipeptidase 2
ENSG00000077684	-0.269017	0.191395	0.442297	JADE1	jade family PHD finger 1
ENSG00000077713	0.623777	0.0804567	0.266452	SLC25A43	solute carrier family 25 member 43
ENSG00000077721	-0.61993	0.00098936	0.0218468	UBE2A	ubiquitin conjugating enzyme E2 A
ENSG00000077782	-0.391078	0.017029	0.105945	FGFR1	fibroblast growth factor receptor 1
ENSG00000077800	0.0591064	0.812399	NA	FKBP6	FK506 binding protein 6
ENSG00000077935	0.0818113	0.742602	NA	SMC1B	structural maintenance of chromosomes 1B
ENSG00000077942	-0.617819	0.13729	0.364618	FBLN1	fibulin 1
ENSG00000077943	-0.673439	0.079903	0.265246	ITGA8	integrin subunit alpha 8
ENSG00000077984	0.127889	0.772438	NA	CST7	cystatin F
ENSG00000078018	0.557289	0.131064	0.354014	MAP2	microtubule associated protein 2
ENSG00000078043	-0.0377528	0.907914	0.96232	PIAS2	protein inhibitor of activated STAT 2
ENSG00000078053	-0.21912	0.564028	0.778222	AMPH	amphiphysin
ENSG00000078061	-0.379105	0.28239	0.545194	ARAF	A-Raf proto-oncogene, serine/threonine kinase
ENSG00000078070	-0.0480955	0.82655	0.925096	MCCC1	methylcrotonoyl-CoA carboxylase 1
ENSG00000078081	0.00285637	0.994776	0.998601	LAMP3	lysosomal associated membrane protein 3
ENSG00000078098	0.859233	0.0871678	0.279582	FAP	fibroblast activation protein alpha
ENSG00000078114	-0.0428929	0.848489	0.935841	NEBL	nebulette
ENSG00000078124	0.459151	0.0403681	0.177607	ACER3	alkaline ceramidase 3
ENSG00000078140	-0.353178	0.0324889	0.155655	UBE2K	ubiquitin conjugating enzyme E2 K
ENSG00000078142	-0.125189	0.496103	0.731702	PIK3C3	phosphatidylinositol 3-kinase catalytic subunit type 3
ENSG00000078177	0.477325	0.077195	0.259956	N4BP2	NEDD4 binding protein 2
ENSG00000078237	-0.0542471	0.854872	0.938426	TIGAR	TP53 induced glycolysis regulatory phosphatase
ENSG00000078246	-0.402975	0.376803	0.634929	TULP3	tubby like protein 3
ENSG00000078269	-0.106122	0.648533	0.833099	SYNJ2	synaptojanin 2
ENSG00000078295	0.775209	0.0246646	0.132372	ADCY2	adenylate cyclase 2
ENSG00000078304	-0.24075	0.0613835	0.227929	PPP2R5C	protein phosphatase 2 regulatory subunit B'gamma
ENSG00000078319	0.218167	0.53705	NA	NA	NA
ENSG00000078328	-0.757684	0.00496687	0.0535901	RBFOX1	RNA binding fox-1 homolog 1
ENSG00000078369	-0.380584	0.00647251	0.061279	GNB1	G protein subunit beta 1
ENSG00000078401	-1.14852	0.00613007	0.0594314	EDN1	endothelin 1
ENSG00000078403	0.207229	0.456085	0.701264	MLLT10	MLLT10, histone lysine methyltransferase DOT1L cofactor
ENSG00000078487	-0.0497314	0.886981	0.952155	ZCWPW1	zinc finger CW-type and PWWP domain containing 1
ENSG00000078549	-0.671459	0.151613	0.387135	ADCYAP1R1	ADCYAP receptor type I
ENSG00000078579	0.0591064	0.812399	NA	FGF20	fibroblast growth factor 20
ENSG00000078589	0.0276174	0.915037	NA	P2RY10	P2Y receptor family member 10
ENSG00000078596	-0.257139	0.314897	0.576824	ITM2A	integral membrane protein 2A
ENSG00000078618	-0.32427	0.0241636	0.130683	NRDC	nardilysin convertase
ENSG00000078668	-0.00751667	0.972865	0.990106	VDAC3	voltage dependent anion channel 3
ENSG00000078674	0.0953079	0.606591	0.806535	PCM1	pericentriolar material 1
ENSG00000078687	-0.295596	0.229635	0.488946	TNRC6C	trinucleotide repeat containing 6C
ENSG00000078699	0.782056	0.00253305	0.0367164	CBFA2T2	CBFA2/RUNX1 translocation partner 2
ENSG00000078725	1.2867	0.0098028	0.0786208	BRINP1	BMP/retinoic acid inducible neural specific 1
ENSG00000078747	-0.416157	0.112864	0.323561	ITCH	itchy E3 ubiquitin protein ligase
ENSG00000078795	1.17019	0.00215354	0.0334293	PKD2L2	polycystin 2 like 2, transient receptor potential cation channel
ENSG00000078804	-0.15519	0.573443	0.783804	TP53INP2	tumor protein p53 inducible nuclear protein 2
ENSG00000078808	-0.525509	0.00762512	0.0669635	SDF4	stromal cell derived factor 4
ENSG00000078814	-0.227608	0.365227	0.624384	MYH7B	myosin heavy chain 7B
ENSG00000078900	0.128514	0.795181	0.910867	TP73	tumor protein p73
ENSG00000078902	-0.392374	0.143156	0.37336	TOLLIP	toll interacting protein
ENSG00000078967	-0.246115	0.361407	0.621149	UBE2D4	ubiquitin conjugating enzyme E2 D4 (putative)
ENSG00000079101	0.518283	0.27748	0.540805	CLUL1	clusterin like 1
ENSG00000079102	-0.0457553	0.834656	0.929273	RUNX1T1	RUNX1 translocation partner 1
ENSG00000079112	1.04604	0.0036374	0.0450075	CDH17	cadherin 17
ENSG00000079134	-0.17885	0.524039	0.751647	THOC1	THO complex 1
ENSG00000079150	0.105511	0.75443	0.890628	FKBP7	FK506 binding protein 7
ENSG00000079156	0.192976	0.541819	0.762754	OSBPL6	oxysterol binding protein like 6
ENSG00000079215	0.388815	0.189076	0.439231	SLC1A3	solute carrier family 1 member 3
ENSG00000079246	-0.242773	0.160171	0.399518	XRCC5	X-ray repair cross complementing 5
ENSG00000079257	0.212451	0.62901	0.820991	LXN	latexin
ENSG00000079263	-0.177092	0.713599	NA	SP140	SP140 nuclear body protein
ENSG00000079277	0.35876	0.126807	0.346821	MKNK1	MAP kinase interacting serine/threonine kinase 1
ENSG00000079308	-0.171226	0.544197	0.764597	TNS1	tensin 1
ENSG00000079313	-0.817834	0.0897238	0.284288	REXO1	RNA exonuclease 1 homolog
ENSG00000079332	-0.402848	0.1789	0.425817	SAR1A	secretion associated Ras related GTPase 1A
ENSG00000079335	0.0609335	0.90431	NA	CDC14A	cell division cycle 14A
ENSG00000079337	-0.470324	0.230824	0.489773	RAPGEF3	Rap guanine nucleotide exchange factor 3
ENSG00000079385	0.147323	0.691913	0.857625	CEACAM1	carcinoembryonic antigen related cell adhesion molecule 1
ENSG00000079387	-0.525024	0.10007	0.302242	SENP1	SUMO specific peptidase 1
ENSG00000079393	0.0220108	0.943187	0.9775	DUSP13	dual specificity phosphatase 13
ENSG00000079432	-0.17818	0.543234	0.763722	CIC	capicua transcriptional repressor
ENSG00000079435	-0.360978	0.381431	0.639148	LIPE	lipase E, hormone sensitive type
ENSG00000079459	-0.0591204	0.75254	0.88997	FDFT1	farnesyl-diphosphate farnesyltransferase 1
ENSG00000079462	-0.122393	0.785502	0.906375	PAFAH1B3	platelet activating factor acetylhydrolase 1b catalytic subunit 3
ENSG00000079482	0.159091	0.500343	0.735166	OPHN1	oligophrenin 1
ENSG00000079557	0.0974279	0.726735	NA	AFM	afamin
ENSG00000079616	-0.262361	0.392844	0.649724	KIF22	kinesin family member 22
ENSG00000079689	-0.59649	0.194758	NA	SCGN	secretagogin, EF-hand calcium binding protein
ENSG00000079691	0.0376545	0.904869	0.960884	CARMIL1	capping protein regulator and myosin 1 linker 1
ENSG00000079739	0.0653549	0.803013	0.915031	PGM1	phosphoglucomutase 1
ENSG00000079785	-0.168952	0.366653	0.625711	DDX1	DEAD-box helicase 1
ENSG00000079805	-0.251608	0.347764	0.607923	DNM2	dynamin 2
ENSG00000079819	-0.423171	0.0981986	0.299015	EPB41L2	erythrocyte membrane protein band 4.1 like 2
ENSG00000079841	0.861833	0.0396672	0.175567	RIMS1	regulating synaptic membrane exocytosis 1
ENSG00000079931	0.144421	0.698391	0.860699	MOXD1	monooxygenase DBH like 1
ENSG00000079950	-0.0835269	0.629367	0.821136	STX7	syntaxin 7
ENSG00000079974	1.14406	5.59393e-05	0.00420815	RABL2B	RAB, member of RAS oncogene family like 2B
ENSG00000079999	-0.257845	0.272538	0.536121	KEAP1	kelch like ECH associated protein 1
ENSG00000080007	0.0760947	0.871032	0.945183	DDX43	DEAD-box helicase 43
ENSG00000080031	-0.041072	0.932714	0.972985	PTPRH	protein tyrosine phosphatase, receptor type H
ENSG00000080166	0.0719969	0.871559	NA	DCT	dopachrome tautomerase
ENSG00000080189	0.035523	0.917465	0.966522	SLC35C2	solute carrier family 35 member C2
ENSG00000080200	0.171852	0.523302	0.751123	CRYBG3	crystallin beta-gamma domain containing 3
ENSG00000080224	0.159061	0.685316	NA	EPHA6	EPH receptor A6
ENSG00000080293	0.405073	0.383976	NA	SCTR	secretin receptor
ENSG00000080298	-0.299503	0.455378	0.70096	RFX3	regulatory factor X3
ENSG00000080345	0.281499	0.194846	0.447192	RIF1	replication timing regulatory factor 1
ENSG00000080371	-0.122875	0.553921	0.77151	RAB21	RAB21, member RAS oncogene family
ENSG00000080493	0.0825762	0.768701	0.898411	SLC4A4	solute carrier family 4 member 4
ENSG00000080503	-0.142048	0.345782	0.605794	SMARCA2	SWI/SNF related, matrix associated, actin dependent regulator of chromatin, subfamily a, member 2
ENSG00000080511	0.349191	0.456544	NA	RDH8	retinol dehydrogenase 8
ENSG00000080546	-0.196691	0.458062	0.703336	SESN1	sestrin 1
ENSG00000080561	-0.257277	0.613473	0.811045	MID2	midline 2
ENSG00000080572	1.50782	0.00127836	0.0252396	PIH1D3	PIH1 domain containing 3
ENSG00000080573	-1.67525	5.47685e-05	0.00417671	COL5A3	collagen type V alpha 3 chain
ENSG00000080603	0.76391	0.0244321	0.131578	SRCAP	Snf2 related CREBBP activator protein
ENSG00000080608	-0.123049	0.754339	0.890628	PUM3	pumilio RNA binding family member 3
ENSG00000080644	0.365356	0.468216	0.711201	CHRNA3	cholinergic receptor nicotinic alpha 3 subunit
ENSG00000080709	-0.246644	0.462977	0.707513	KCNN2	potassium calcium-activated channel subfamily N member 2
ENSG00000080802	0.295745	0.137401	0.364866	CNOT4	CCR4-NOT transcription complex subunit 4
ENSG00000080815	0.105712	0.675581	0.848471	PSEN1	presenilin 1
ENSG00000080819	-0.330355	0.356784	0.616394	CPOX	coproporphyrinogen oxidase
ENSG00000080822	-0.492157	0.00688028	0.0635932	CLDND1	claudin domain containing 1
ENSG00000080823	0.548348	0.0700886	0.245551	MOK	MOK protein kinase
ENSG00000080824	-0.0174189	0.942399	0.97714	HSP90AA1	heat shock protein 90 alpha family class A member 1
ENSG00000080839	0.958476	0.0063818	0.0607103	RBL1	RB transcriptional corepressor like 1
ENSG00000080845	-0.231021	0.41111	0.665072	DLGAP4	DLG associated protein 4
ENSG00000080854	-0.131038	0.791598	NA	IGSF9B	immunoglobulin superfamily member 9B
ENSG00000080910	0.0698034	0.779289	NA	CFHR2	complement factor H related 2
ENSG00000080947	0.905609	0.0163319	0.103705	CROCCP3	ciliary rootlet coiled-coil, rootletin pseudogene 3
ENSG00000080986	1.28829	0.00179236	0.0302174	NDC80	NDC80, kinetochore complex component
ENSG00000081014	0.672819	0.0161539	0.103093	AP4E1	adaptor related protein complex 4 subunit epsilon 1
ENSG00000081019	-0.286875	0.243067	0.504154	RSBN1	round spermatid basic protein 1
ENSG00000081026	0.283101	0.350321	0.610325	MAGI3	membrane associated guanylate kinase, WW and PDZ domain containing 3
ENSG00000081041	-1.19876	0.00919225	0.0751915	CXCL2	C-X-C motif chemokine ligand 2
ENSG00000081051	0.0667471	0.78871	NA	AFP	alpha fetoprotein
ENSG00000081052	-0.698266	0.057153	0.218344	COL4A4	collagen type IV alpha 4 chain
ENSG00000081059	0.00157596	0.993948	0.998429	TCF7	transcription factor 7
ENSG00000081087	0.400782	0.0493051	0.199595	OSTM1	osteoclastogenesis associated transmembrane protein 1
ENSG00000081138	0.546077	0.087623	0.280573	CDH7	cadherin 7
ENSG00000081148	0.554373	0.174401	0.419773	IMPG2	interphotoreceptor matrix proteoglycan 2
ENSG00000081154	-0.11046	0.576099	0.785461	PCNP	PEST proteolytic signal containing nuclear protein
ENSG00000081177	0.342066	0.259973	0.522853	EXD2	exonuclease 3'-5' domain containing 2
ENSG00000081181	-0.0231715	0.931236	0.972334	ARG2	arginase 2
ENSG00000081189	-0.268508	0.174126	0.41943	MEF2C	myocyte enhancer factor 2C
ENSG00000081237	-0.0915448	0.793855	0.910128	PTPRC	protein tyrosine phosphatase, receptor type C
ENSG00000081277	0.0394115	0.891534	NA	PKP1	plakophilin 1
ENSG00000081307	-0.420818	0.0758666	0.257436	UBA5	ubiquitin like modifier activating enzyme 5
ENSG00000081320	-0.47247	0.0894432	0.283833	STK17B	serine/threonine kinase 17b
ENSG00000081377	-0.173064	0.471327	0.713254	CDC14B	cell division cycle 14B
ENSG00000081386	-0.499359	0.112363	0.323047	ZNF510	zinc finger protein 510
ENSG00000081479	0.724107	0.0971716	0.297152	LRP2	LDL receptor related protein 2
ENSG00000081665	0.735899	0.00143127	0.0266914	ZNF506	zinc finger protein 506
ENSG00000081692	-0.000433956	0.998573	0.999637	JMJD4	jumonji domain containing 4
ENSG00000081721	0.202628	0.572211	0.782892	DUSP12	dual specificity phosphatase 12
ENSG00000081760	0.65915	0.000454777	0.0140628	AACS	acetoacetyl-CoA synthetase
ENSG00000081791	-0.0918616	0.776724	0.902048	DELE1	DAP3 binding cell death enhancer 1
ENSG00000081800	1.00877	0.0230976	0.127034	SLC13A1	solute carrier family 13 member 1
ENSG00000081803	-0.652925	0.0477153	0.195801	CADPS2	calcium dependent secretion activator 2
ENSG00000081818	-0.727601	0.132591	0.356836	PCDHB4	protocadherin beta 4
ENSG00000081842	0.22001	0.520786	NA	PCDHA6	protocadherin alpha 6
ENSG00000081853	-0.235	0.451912	0.698695	PCDHGA2	protocadherin gamma subfamily A, 2
ENSG00000081870	0.170026	0.51963	0.749001	HSPB11	heat shock protein family B (small) member 11
ENSG00000081913	0.334294	0.229605	0.488946	PHLPP1	PH domain and leucine rich repeat protein phosphatase 1
ENSG00000081923	0.866509	0.00636392	0.0607069	ATP8B1	ATPase phospholipid transporting 8B1
ENSG00000081985	0.939249	0.0470549	0.194338	IL12RB2	interleukin 12 receptor subunit beta 2
ENSG00000082014	-0.243694	0.481723	0.721593	SMARCD3	SWI/SNF related, matrix associated, actin dependent regulator of chromatin, subfamily d, member 3
ENSG00000082068	0.185649	0.650228	0.834048	WDR70	WD repeat domain 70
ENSG00000082074	-0.158862	0.725962	0.875029	FYB1	FYN binding protein 1
ENSG00000082126	0.805198	0.0606161	0.226007	MPP4	membrane palmitoylated protein 4
ENSG00000082146	-0.61019	0.0440307	0.186297	STRADB	STE20-related kinase adaptor beta
ENSG00000082153	-0.151925	0.318152	0.57996	BZW1	basic leucine zipper and W2 domains 1
ENSG00000082175	0.17097	0.481141	0.720964	PGR	progesterone receptor
ENSG00000082196	-0.184067	0.705102	0.863244	C1QTNF3	C1q and TNF related 3
ENSG00000082212	-0.0770919	0.756986	0.892008	ME2	malic enzyme 2
ENSG00000082213	0.0549499	0.852466	0.937427	C5orf22	chromosome 5 open reading frame 22
ENSG00000082258	-0.153472	0.477215	0.717982	CCNT2	cyclin T2
ENSG00000082269	0.520045	0.0557144	0.214859	FAM135A	family with sequence similarity 135 member A
ENSG00000082293	0.671037	0.112412	0.323047	COL19A1	collagen type XIX alpha 1 chain
ENSG00000082397	-0.605826	0.109621	0.318126	EPB41L3	erythrocyte membrane protein band 4.1 like 3
ENSG00000082438	-0.000537465	0.99839	0.999561	COBLL1	cordon-bleu WH2 repeat protein like 1
ENSG00000082458	-0.335683	0.263507	0.527203	DLG3	discs large MAGUK scaffold protein 3
ENSG00000082482	-0.198477	0.637175	NA	KCNK2	potassium two pore domain channel subfamily K member 2
ENSG00000082497	0.672462	0.103711	0.30852	SERTAD4	SERTA domain containing 4
ENSG00000082512	1.18273	9.28201e-05	0.00567456	TRAF5	TNF receptor associated factor 5
ENSG00000082515	-0.137017	0.558995	0.774455	MRPL22	mitochondrial ribosomal protein L22
ENSG00000082516	0.146523	0.649303	0.833439	GEMIN5	gem nuclear organelle associated protein 5
ENSG00000082556	1.04269	0.00550412	0.0567628	OPRK1	opioid receptor kappa 1
ENSG00000082641	-0.402205	0.0529474	0.208035	NFE2L1	nuclear factor, erythroid 2 like 1
ENSG00000082684	0.279066	0.488688	0.726193	SEMA5B	semaphorin 5B
ENSG00000082701	-0.308909	0.206459	0.461506	GSK3B	glycogen synthase kinase 3 beta
ENSG00000082781	-0.391959	0.136589	0.36345	ITGB5	integrin subunit beta 5
ENSG00000082805	0.550511	0.063661	0.232784	ERC1	ELKS/RAB6-interacting/CAST family member 1
ENSG00000082898	0.131727	0.585544	0.791038	XPO1	exportin 1
ENSG00000082996	-0.0108629	0.962088	0.986036	RNF13	ring finger protein 13
ENSG00000083067	0.217039	0.448282	0.695635	TRPM3	transient receptor potential cation channel subfamily M member 3
ENSG00000083093	0.40738	0.331317	0.593381	PALB2	partner and localizer of BRCA2
ENSG00000083097	0.134909	0.678351	0.849787	DOP1A	DOP1 leucine zipper like protein A
ENSG00000083099	0.0618541	0.763618	0.895772	LYRM2	LYR motif containing 2
ENSG00000083123	-0.261048	0.269622	0.532763	BCKDHB	branched chain keto acid dehydrogenase E1 subunit beta
ENSG00000083168	-0.364771	0.00447701	0.0503007	KAT6A	lysine acetyltransferase 6A
ENSG00000083223	0.333109	0.39142	0.648238	TUT7	terminal uridylyl transferase 7
ENSG00000083290	0.170238	0.455814	0.701242	ULK2	unc-51 like autophagy activating kinase 2
ENSG00000083307	0.416476	0.413743	NA	GRHL2	grainyhead like transcription factor 2
ENSG00000083312	0.298494	0.393896	0.650881	TNPO1	transportin 1
ENSG00000083444	-0.646151	0.0336547	0.158914	PLOD1	procollagen-lysine,2-oxoglutarate 5-dioxygenase 1
ENSG00000083454	-0.310618	0.424123	0.677035	P2RX5	purinergic receptor P2X 5
ENSG00000083457	-0.0945886	0.725935	0.875029	ITGAE	integrin subunit alpha E
ENSG00000083520	0.260482	0.107172	0.314223	DIS3	DIS3 homolog, exosome endoribonuclease and 3'-5' exoribonuclease
ENSG00000083535	0.318915	0.397568	0.65393	PIBF1	progesterone immunomodulatory binding factor 1
ENSG00000083544	0.303083	0.229377	0.488844	TDRD3	tudor domain containing 3
ENSG00000083635	-0.150521	0.679301	0.850377	NUFIP1	nuclear FMR1 interacting protein 1
ENSG00000083642	-0.0782653	0.66041	0.84055	PDS5B	PDS5 cohesin associated factor B
ENSG00000083720	-0.00425774	0.989015	0.997058	OXCT1	3-oxoacid CoA-transferase 1
ENSG00000083750	-0.0895812	0.822387	0.92323	RRAGB	Ras related GTP binding B
ENSG00000083782	0.0669144	0.788194	NA	EPYC	epiphycan
ENSG00000083799	0.267948	0.258314	0.521279	CYLD	CYLD lysine 63 deubiquitinase
ENSG00000083807	0.779481	0.0136972	0.0944586	SLC27A5	solute carrier family 27 member 5
ENSG00000083812	-0.412143	0.327631	0.589158	ZNF324	zinc finger protein 324
ENSG00000083814	0.0742812	0.83805	0.930862	ZNF671	zinc finger protein 671
ENSG00000083817	0.323653	0.524136	NA	ZNF416	zinc finger protein 416
ENSG00000083828	-0.115538	0.811652	0.919344	ZNF586	zinc finger protein 586
ENSG00000083838	-0.813624	0.0521543	0.206717	ZNF446	zinc finger protein 446
ENSG00000083844	0.498077	0.0522931	0.206974	ZNF264	zinc finger protein 264
ENSG00000083845	-0.705362	0.00021724	0.009062	RPS5	ribosomal protein S5
ENSG00000083857	0.32127	0.345031	0.60529	FAT1	FAT atypical cadherin 1
ENSG00000083896	0.013557	0.955429	0.983459	YTHDC1	YTH domain containing 1
ENSG00000083937	-0.23692	0.273306	0.536886	CHMP2B	charged multivesicular body protein 2B
ENSG00000084070	-0.480473	0.110301	0.319391	SMAP2	small ArfGAP2
ENSG00000084072	0.15055	0.513415	0.744652	PPIE	peptidylprolyl isomerase E
ENSG00000084073	-0.160096	0.431593	0.682546	ZMPSTE24	zinc metallopeptidase STE24
ENSG00000084090	-0.287834	0.258524	0.521466	STARD7	StAR related lipid transfer domain containing 7
ENSG00000084092	0.699244	0.0052964	0.0557315	NOA1	nitric oxide associated 1
ENSG00000084093	-0.0809549	0.738884	0.882075	REST	RE1 silencing transcription factor
ENSG00000084112	0.0958811	0.561364	0.776428	SSH1	slingshot protein phosphatase 1
ENSG00000084207	-0.082177	0.789604	0.908423	GSTP1	glutathione S-transferase pi 1
ENSG00000084234	-0.26559	0.333162	0.595054	APLP2	amyloid beta precursor like protein 2
ENSG00000084444	0.462668	0.112548	0.323047	FAM234B	family with sequence similarity 234 member B
ENSG00000084453	1.33823	0.00288308	0.0395435	SLCO1A2	solute carrier organic anion transporter family member 1A2
ENSG00000084463	-0.428457	0.0587582	0.22214	WBP11	WW domain binding protein 11
ENSG00000084623	-0.418631	0.0116471	0.0867178	EIF3I	eukaryotic translation initiation factor 3 subunit I
ENSG00000084628	0.119724	0.681691	NA	NKAIN1	sodium/potassium transporting ATPase interacting 1
ENSG00000084636	0.584955	0.180074	0.427493	COL16A1	collagen type XVI alpha 1 chain
ENSG00000084652	-0.0690528	0.813826	0.920142	TXLNA	taxilin alpha
ENSG00000084674	-0.823331	0.0589644	0.222692	APOB	apolipoprotein B
ENSG00000084676	-0.440804	0.235014	0.495105	NCOA1	nuclear receptor coactivator 1
ENSG00000084693	0.0435868	0.902812	0.959357	AGBL5	ATP/GTP binding protein like 5
ENSG00000084710	0.0716472	0.804571	0.915831	EFR3B	EFR3 homolog B
ENSG00000084731	-0.302225	0.522099	0.750416	KIF3C	kinesin family member 3C
ENSG00000084733	-0.284	0.187977	0.438008	RAB10	RAB10, member RAS oncogene family
ENSG00000084734	0.512735	0.283635	NA	GCKR	glucokinase regulator
ENSG00000084754	-0.585766	0.0336633	0.158914	HADHA	hydroxyacyl-CoA dehydrogenase trifunctional multienzyme complex subunit alpha
ENSG00000084764	-0.884813	5.86338e-05	0.00432293	MAPRE3	microtubule associated protein RP/EB family member 3
ENSG00000084774	0.6645	0.0343597	0.160939	CAD	carbamoyl-phosphate synthetase 2, aspartate transcarbamylase, and dihydroorotase
ENSG00000085063	-0.402958	0.0418575	0.181178	CD59	CD59 molecule (CD59 blood group)
ENSG00000085117	-0.404607	0.142679	0.372817	CD82	CD82 molecule
ENSG00000085185	-0.432369	0.2611	0.524326	BCORL1	BCL6 corepressor like 1
ENSG00000085224	0.160762	0.461244	0.706024	ATRX	ATRX, chromatin remodeler
ENSG00000085231	-0.170513	0.538617	0.760562	AK6	adenylate kinase 6
ENSG00000085265	1.12257	0.004978	0.0536271	FCN1	ficolin 1
ENSG00000085274	0.0870577	0.754346	0.890628	MYNN	myoneurin
ENSG00000085276	-0.214739	0.501617	0.736109	MECOM	MDS1 and EVI1 complex locus
ENSG00000085365	0.0672912	0.775469	0.901478	SCAMP1	secretory carrier membrane protein 1
ENSG00000085377	0.0274875	0.907942	0.96232	PREP	prolyl endopeptidase
ENSG00000085382	0.479327	0.0959069	0.294647	HACE1	HECT domain and ankyrin repeat containing E3 ubiquitin protein ligase 1
ENSG00000085415	0.423311	0.0285163	0.144226	SEH1L	SEH1 like nucleoporin
ENSG00000085433	-0.169786	0.63254	0.822765	WDR47	WD repeat domain 47
ENSG00000085449	-0.252101	0.398875	0.655206	WDFY1	WD repeat and FYVE domain containing 1
ENSG00000085465	0.468437	0.345262	NA	OVGP1	oviductal glycoprotein 1
ENSG00000085491	-0.279614	0.441931	0.6904	SLC25A24	solute carrier family 25 member 24
ENSG00000085511	0.38986	0.201122	0.454558	MAP3K4	mitogen-activated protein kinase kinase kinase 4
ENSG00000085514	0.00330199	0.994729	0.998599	PILRA	paired immunoglobin like type 2 receptor alpha
ENSG00000085552	0.448489	0.291438	0.555169	IGSF9	immunoglobulin superfamily member 9
ENSG00000085563	-0.149499	0.726695	0.875426	ABCB1	ATP binding cassette subfamily B member 1
ENSG00000085644	-0.0627912	0.821848	0.922952	ZNF213	zinc finger protein 213
ENSG00000085662	0.18658	0.423382	0.676193	AKR1B1	aldo-keto reductase family 1 member B
ENSG00000085719	-0.0361595	0.878179	0.948163	CPNE3	copine 3
ENSG00000085721	-0.115016	0.654606	0.836954	RRN3	RRN3 homolog, RNA polymerase I transcription factor
ENSG00000085733	-0.0755526	0.779653	0.9033	CTTN	cortactin
ENSG00000085741	0.0309299	0.951405	NA	WNT11	Wnt family member 11
ENSG00000085760	-0.022963	0.918363	0.966595	MTIF2	mitochondrial translational initiation factor 2
ENSG00000085788	-0.0295529	0.854527	0.938284	DDHD2	DDHD domain containing 2
ENSG00000085831	-0.0312992	0.924395	0.969341	TTC39A	tetratricopeptide repeat domain 39A
ENSG00000085832	-0.133596	0.53335	0.757996	EPS15	epidermal growth factor receptor pathway substrate 15
ENSG00000085840	0.913682	0.0551944	0.21369	ORC1	origin recognition complex subunit 1
ENSG00000085871	-0.19907	0.334628	0.59651	MGST2	microsomal glutathione S-transferase 2
ENSG00000085872	-0.117564	0.646	0.831122	CHERP	calcium homeostasis endoplasmic reticulum protein
ENSG00000085978	0.0822736	0.807829	0.917324	ATG16L1	autophagy related 16 like 1
ENSG00000085982	-0.121618	0.675933	0.848674	USP40	ubiquitin specific peptidase 40
ENSG00000085998	0.378209	0.10785	0.315296	POMGNT1	protein O-linked mannose N-acetylglucosaminyltransferase 1 (beta 1,2-)
ENSG00000085999	0.734007	0.148616	NA	RAD54L	RAD54 like
ENSG00000086015	-0.28429	0.346	0.606026	MAST2	microtubule associated serine/threonine kinase 2
ENSG00000086061	0.0190791	0.913102	0.964754	DNAJA1	DnaJ heat shock protein family (Hsp40) member A1
ENSG00000086062	-0.201305	0.512996	0.744537	B4GALT1	beta-1,4-galactosyltransferase 1
ENSG00000086065	-0.00306311	0.987036	0.99628	CHMP5	charged multivesicular body protein 5
ENSG00000086102	0.168975	0.256863	0.519343	NFX1	nuclear transcription factor, X-box binding 1
ENSG00000086159	1.19053	0.00591076	0.0587438	AQP6	aquaporin 6
ENSG00000086189	-0.320576	0.124132	0.341864	DIMT1	DIM1 dimethyladenosine transferase 1 homolog
ENSG00000086200	0.111739	0.72185	0.872153	IPO11	importin 11
ENSG00000086205	0.0978714	0.841463	NA	FOLH1	folate hydrolase 1
ENSG00000086232	-0.360429	0.0328878	0.156901	EIF2AK1	eukaryotic translation initiation factor 2 alpha kinase 1
ENSG00000086288	0.175371	0.678348	NA	NME8	NME/NM23 family member 8
ENSG00000086289	-0.0340054	0.903332	0.959726	EPDR1	ependymin related 1
ENSG00000086300	-0.115591	0.792625	0.909379	SNX10	sorting nexin 10
ENSG00000086475	-0.414126	0.0784537	0.262405	SEPHS1	selenophosphate synthetase 1
ENSG00000086504	-0.0620107	0.86013	0.940828	MRPL28	mitochondrial ribosomal protein L28
ENSG00000086506	0.0591064	0.812399	NA	HBQ1	hemoglobin subunit theta 1
ENSG00000086544	-1.37761	0.000113949	0.00635364	ITPKC	inositol-trisphosphate 3-kinase C
ENSG00000086548	0.113874	0.763371	NA	CEACAM6	carcinoembryonic antigen related cell adhesion molecule 6
ENSG00000086570	0.0721276	0.772146	NA	FAT2	FAT atypical cadherin 2
ENSG00000086589	-0.163958	0.45434	0.70048	RBM22	RNA binding motif protein 22
ENSG00000086598	-0.295775	0.12261	0.339737	TMED2	transmembrane p24 trafficking protein 2
ENSG00000086619	0.0405387	0.89567	0.955519	ERO1B	endoplasmic reticulum oxidoreductase 1 beta
ENSG00000086666	-0.314281	0.179677	0.427007	ZFAND6	zinc finger AN1-type containing 6
ENSG00000086696	1.37251	0.000309249	0.011141	HSD17B2	hydroxysteroid 17-beta dehydrogenase 2
ENSG00000086712	0.623035	0.0519433	0.206239	TXLNG	taxilin gamma
ENSG00000086717	0.492931	0.332769	NA	PPEF1	protein phosphatase with EF-hand domain 1
ENSG00000086730	0.617216	0.0476416	0.195729	LAT2	linker for activation of T cells family member 2
ENSG00000086758	-0.0757017	0.685331	0.853615	HUWE1	HECT, UBA and WWE domain containing 1, E3 ubiquitin protein ligase
ENSG00000086827	-0.395278	0.208334	0.463969	ZW10	zw10 kinetochore protein
ENSG00000086848	0.265737	0.171454	0.416018	ALG9	ALG9, alpha-1,2-mannosyltransferase
ENSG00000086991	1.0253	0.00365543	0.0450924	NOX4	NADPH oxidase 4
ENSG00000087008	-0.197383	0.575731	0.785191	ACOX3	acyl-CoA oxidase 3, pristanoyl
ENSG00000087053	-0.310627	0.25473	0.516974	MTMR2	myotubularin related protein 2
ENSG00000087074	-0.349185	0.131867	0.355619	PPP1R15A	protein phosphatase 1 regulatory subunit 15A
ENSG00000087076	0.027777	0.946836	0.979771	HSD17B14	hydroxysteroid 17-beta dehydrogenase 14
ENSG00000087077	-0.103019	0.703458	0.862876	TRIP6	thyroid hormone receptor interactor 6
ENSG00000087085	-0.0910001	0.847478	NA	ACHE	acetylcholinesterase (Cartwright blood group)
ENSG00000087086	0.10848	0.798063	0.912966	FTL	ferritin light chain
ENSG00000087087	-0.358584	0.143666	0.373902	SRRT	serrate, RNA effector molecule
ENSG00000087088	0.339744	0.446303	0.694109	BAX	BCL2 associated X, apoptosis regulator
ENSG00000087095	-0.00300867	0.990659	0.997426	NLK	nemo like kinase
ENSG00000087111	-0.128505	0.502187	0.736599	PIGS	phosphatidylinositol glycan anchor biosynthesis class S
ENSG00000087116	0.256745	0.473871	0.715093	ADAMTS2	ADAM metallopeptidase with thrombospondin type 1 motif 2
ENSG00000087128	0.00271248	0.99131	NA	TMPRSS11E	transmembrane serine protease 11E
ENSG00000087152	-0.379385	0.119248	0.334305	ATXN7L3	ataxin 7 like 3
ENSG00000087157	-0.323988	0.228051	0.487441	PGS1	phosphatidylglycerophosphate synthase 1
ENSG00000087191	-0.11766	0.591469	0.795749	PSMC5	proteasome 26S subunit, ATPase 5
ENSG00000087206	0.0653719	0.812769	0.919516	UIMC1	ubiquitin interaction motif containing 1
ENSG00000087237	-0.0660484	0.793201	NA	CETP	cholesteryl ester transfer protein
ENSG00000087245	-0.657946	0.0412313	0.179591	MMP2	matrix metallopeptidase 2
ENSG00000087250	-0.234848	0.644279	0.830485	MT3	metallothionein 3
ENSG00000087253	-0.351893	0.138629	0.36691	LPCAT2	lysophosphatidylcholine acyltransferase 2
ENSG00000087258	0.026302	0.952595	0.981976	GNAO1	G protein subunit alpha o1
ENSG00000087263	-0.0832214	0.623909	0.817782	OGFOD1	2-oxoglutarate and iron dependent oxygenase domain containing 1
ENSG00000087266	-0.13408	0.433583	0.683823	SH3BP2	SH3 domain binding protein 2
ENSG00000087269	-0.169816	0.453546	0.699837	NOP14	NOP14 nucleolar protein
ENSG00000087274	-0.522859	0.00693104	0.0638495	ADD1	adducin 1
ENSG00000087299	0.0861774	0.69724	0.859671	L2HGDH	L-2-hydroxyglutarate dehydrogenase
ENSG00000087301	0.513559	0.256502	0.518986	TXNDC16	thioredoxin domain containing 16
ENSG00000087302	-0.18042	0.433928	0.683881	RTRAF	RNA transcription, translation and transport factor
ENSG00000087303	0.0485358	0.890128	0.953207	NID2	nidogen 2
ENSG00000087338	-0.155951	0.52545	0.752356	GMCL1	germ cell-less, spermatogenesis associated 1
ENSG00000087365	-0.179201	0.395529	0.652075	SF3B2	splicing factor 3b subunit 2
ENSG00000087448	-0.368005	0.23993	0.500754	KLHL42	kelch like family member 42
ENSG00000087460	-0.198367	0.448073	0.695603	GNAS	GNAS complex locus
ENSG00000087470	0.255024	0.129456	0.351551	DNM1L	dynamin 1 like
ENSG00000087494	0.262628	0.605575	NA	PTHLH	parathyroid hormone like hormone
ENSG00000087495	0.0282963	0.925283	0.969585	PHACTR3	phosphatase and actin regulator 3
ENSG00000087502	0.486737	0.00636925	0.0607069	ERGIC2	ERGIC and golgi 2
ENSG00000087510	-0.693379	0.0130279	0.0923934	TFAP2C	transcription factor AP-2 gamma
ENSG00000087586	-0.0911294	0.762918	0.895282	AURKA	aurora kinase A
ENSG00000087589	0.2844	0.381355	0.639106	CASS4	Cas scaffold protein family member 4
ENSG00000087842	-0.167219	0.469915	0.712075	PIR	pirin
ENSG00000087884	-0.370244	0.121852	0.338568	AAMDC	adipogenesis associated Mth938 domain containing
ENSG00000087903	0.701803	0.0221894	0.124288	RFX2	regulatory factor X2
ENSG00000087995	-0.101044	0.731962	0.878228	METTL2A	methyltransferase like 2A
ENSG00000088002	1.00155	0.0419558	0.181427	SULT2B1	sulfotransferase family 2B member 1
ENSG00000088035	-0.109839	0.786743	0.907171	ALG6	ALG6, alpha-1,3-glucosyltransferase
ENSG00000088038	0.0474354	0.924823	NA	CNOT3	CCR4-NOT transcription complex subunit 3
ENSG00000088053	0.287671	0.560452	0.775517	GP6	glycoprotein VI platelet
ENSG00000088179	0.301293	0.187356	0.437259	PTPN4	protein tyrosine phosphatase, non-receptor type 4
ENSG00000088205	-0.264464	0.124391	0.342407	DDX18	DEAD-box helicase 18
ENSG00000088247	-0.688979	5.79945e-05	0.00429005	KHSRP	KH-type splicing regulatory protein
ENSG00000088256	-0.726383	2.31074e-05	0.00234155	GNA11	G protein subunit alpha 11
ENSG00000088280	0.258733	0.538222	0.760439	ASAP3	ArfGAP with SH3 domain, ankyrin repeat and PH domain 3
ENSG00000088298	0.376616	0.458815	NA	EDEM2	ER degradation enhancing alpha-mannosidase like protein 2
ENSG00000088305	-0.00484043	0.992252	NA	DNMT3B	DNA methyltransferase 3 beta
ENSG00000088320	-0.969526	0.0298383	0.148065	REM1	RRAD and GEM like GTPase 1
ENSG00000088325	0.495397	0.330985	NA	TPX2	TPX2, microtubule nucleation factor
ENSG00000088340	1.28989	0.000527905	0.0151013	FER1L4	fer-1 like family member 4, pseudogene
ENSG00000088356	-0.219697	0.528089	0.754238	PDRG1	p53 and DNA damage regulated 1
ENSG00000088367	-0.611134	0.0146037	0.0980296	EPB41L1	erythrocyte membrane protein band 4.1 like 1
ENSG00000088386	0.765513	0.0101777	0.0802644	SLC15A1	solute carrier family 15 member 1
ENSG00000088387	-0.630373	0.0134526	0.0936742	DOCK9	dedicator of cytokinesis 9
ENSG00000088448	0.124967	0.574088	0.783906	ANKRD10	ankyrin repeat domain 10
ENSG00000088451	0.221823	0.599208	0.800799	TGDS	TDP-glucose 4,6-dehydratase
ENSG00000088538	0.00683449	0.983675	0.994534	DOCK3	dedicator of cytokinesis 3
ENSG00000088543	-0.214427	0.472161	0.713765	C3orf18	chromosome 3 open reading frame 18
ENSG00000088682	-0.705545	0.00360092	0.0447422	COQ9	coenzyme Q9
ENSG00000088726	0.788072	0.0635415	0.232462	TMEM40	transmembrane protein 40
ENSG00000088727	0.127329	0.707753	0.864562	KIF9	kinesin family member 9
ENSG00000088756	0.979699	0.00256214	0.0368736	ARHGAP28	Rho GTPase activating protein 28
ENSG00000088766	-0.196741	0.362312	0.621747	CRLS1	cardiolipin synthase 1
ENSG00000088808	0.438151	0.0876967	0.280618	PPP1R13B	protein phosphatase 1 regulatory subunit 13B
ENSG00000088812	-0.255617	0.305969	0.568063	ATRN	attractin
ENSG00000088826	0.308609	0.538206	NA	SMOX	spermine oxidase
ENSG00000088827	-0.393874	0.345371	0.605456	SIGLEC1	sialic acid binding Ig like lectin 1
ENSG00000088832	-0.649821	1.64062e-05	0.00182043	FKBP1A	FK506 binding protein 1A
ENSG00000088833	-0.460566	0.0977182	0.298201	NSFL1C	NSFL1 cofactor
ENSG00000088836	0.124522	0.676988	NA	SLC4A11	solute carrier family 4 member 11
ENSG00000088854	0.260914	0.254655	0.516974	C20orf194	chromosome 20 open reading frame 194
ENSG00000088876	0.642268	0.0931893	0.290254	ZNF343	zinc finger protein 343
ENSG00000088881	-0.38986	0.396211	0.652569	EBF4	EBF family member 4
ENSG00000088882	-0.040664	0.870316	NA	CPXM1	carboxypeptidase X, M14 family member 1
ENSG00000088888	0.304924	0.20375	0.457885	MAVS	mitochondrial antiviral signaling protein
ENSG00000088899	-0.390434	0.250799	0.512707	LZTS3	leucine zipper tumor suppressor family member 3
ENSG00000088926	0.0566406	0.820082	NA	F11	coagulation factor XI
ENSG00000088930	-0.110028	0.619821	0.81492	XRN2	5'-3' exoribonuclease 2
ENSG00000088970	-0.00639576	0.978171	0.992119	KIZ	kizuna centrosomal protein
ENSG00000088986	0.110716	0.73065	0.877508	DYNLL1	dynein light chain LC8-type 1
ENSG00000088992	-0.715713	0.0313618	0.152694	TESC	tescalcin
ENSG00000089006	0.010921	0.949567	0.980764	SNX5	sorting nexin 5
ENSG00000089009	-0.0439968	0.864357	0.94278	RPL6	ribosomal protein L6
ENSG00000089012	-0.148925	0.619251	NA	SIRPG	signal regulatory protein gamma
ENSG00000089022	0.773296	7.15e-05	0.00484515	MAPKAPK5	mitogen-activated protein kinase-activated protein kinase 5
ENSG00000089041	0.957151	0.00276993	0.038612	P2RX7	purinergic receptor P2X 7
ENSG00000089048	0.437007	0.102325	0.306233	ESF1	ESF1 nucleolar pre-rRNA processing protein homolog
ENSG00000089050	0.41091	0.189497	0.439738	RBBP9	RB binding protein 9, serine hydrolase
ENSG00000089053	-0.142472	0.390875	0.647867	ANAPC5	anaphase promoting complex subunit 5
ENSG00000089057	-0.066567	0.846787	0.935252	SLC23A2	solute carrier family 23 member 2
ENSG00000089060	-0.186514	0.608743	0.807775	SLC8B1	solute carrier family 8 member B1
ENSG00000089063	-0.213235	0.214655	0.471645	TMEM230	transmembrane protein 230
ENSG00000089091	0.696344	0.0371999	0.168512	DZANK1	double zinc ribbon and ankyrin repeat domains 1
ENSG00000089094	0.864495	0.00102672	0.022316	KDM2B	lysine demethylase 2B
ENSG00000089101	-0.330585	0.368043	0.626785	CFAP61	cilia and flagella associated protein 61
ENSG00000089116	-0.300067	0.485775	NA	LHX5	LIM homeobox 5
ENSG00000089123	0.108197	0.813967	0.92022	TASP1	taspase 1
ENSG00000089127	0.113902	0.774296	0.900839	OAS1	2'-5'-oligoadenylate synthetase 1
ENSG00000089154	-0.180616	0.453001	0.699583	GCN1	GCN1, eIF2 alpha kinase activator homolog
ENSG00000089157	-0.110797	0.714905	0.868494	RPLP0	ribosomal protein lateral stalk subunit P0
ENSG00000089159	-0.501851	0.0676062	0.240603	PXN	paxillin
ENSG00000089163	0.140799	0.757012	0.892008	SIRT4	sirtuin 4
ENSG00000089169	0.966936	0.0218907	0.123362	RPH3A	rabphilin 3A
ENSG00000089177	0.0424989	0.879626	0.948475	KIF16B	kinesin family member 16B
ENSG00000089195	0.199551	0.516912	0.747035	TRMT6	tRNA methyltransferase 6
ENSG00000089199	0.784072	0.056782	0.21756	CHGB	chromogranin B
ENSG00000089220	-0.420839	0.00177404	0.0301913	PEBP1	phosphatidylethanolamine binding protein 1
ENSG00000089225	-0.123891	0.639777	0.827722	TBX5	T-box 5
ENSG00000089234	0.275388	0.374402	0.63266	BRAP	BRCA1 associated protein
ENSG00000089248	-0.0169556	0.936754	0.975127	ERP29	endoplasmic reticulum protein 29
ENSG00000089250	0.705411	0.0154521	0.100665	NOS1	nitric oxide synthase 1
ENSG00000089280	-0.138851	0.433779	0.683841	FUS	FUS RNA binding protein
ENSG00000089289	-0.288108	0.166762	0.409287	IGBP1	immunoglobulin binding protein 1
ENSG00000089327	-0.533247	0.134768	0.360682	FXYD5	FXYD domain containing ion transport regulator 5
ENSG00000089335	-0.132845	0.43068	0.682212	ZNF302	zinc finger protein 302
ENSG00000089351	0.189782	0.59213	0.796039	GRAMD1A	GRAM domain containing 1A
ENSG00000089356	0.847356	0.0934202	NA	FXYD3	FXYD domain containing ion transport regulator 3
ENSG00000089472	0.650927	0.062426	0.230471	HEPH	hephaestin
ENSG00000089486	-0.496607	0.0942794	0.291939	CDIP1	cell death inducing p53 target 1
ENSG00000089505	0.0995887	0.730751	NA	CMTM1	CKLF like MARVEL transmembrane domain containing 1
ENSG00000089558	0.0579048	0.816141	NA	KCNH4	potassium voltage-gated channel subfamily H member 4
ENSG00000089597	-0.674687	0.00932395	0.0758281	GANAB	glucosidase II alpha subunit
ENSG00000089639	0.0190853	0.938926	NA	GMIP	GEM interacting protein
ENSG00000089682	0.507695	0.0697311	0.24482	RBM41	RNA binding motif protein 41
ENSG00000089685	0.497581	0.20893	0.464583	BIRC5	baculoviral IAP repeat containing 5
ENSG00000089692	-0.0381837	0.88845	NA	LAG3	lymphocyte activating 3
ENSG00000089693	-0.50257	0.0164067	0.10382	MLF2	myeloid leukemia factor 2
ENSG00000089723	0.0656223	0.792185	NA	OTUB2	OTU deubiquitinase, ubiquitin aldehyde binding 2
ENSG00000089737	-0.120483	0.54798	0.767418	DDX24	DEAD-box helicase 24
ENSG00000089775	0.98661	8.34941e-07	0.000239422	ZBTB25	zinc finger and BTB domain containing 25
ENSG00000089818	-0.389972	0.0632018	0.232022	NECAP1	NECAP endocytosis associated 1
ENSG00000089820	-0.490114	0.326517	NA	ARHGAP4	Rho GTPase activating protein 4
ENSG00000089847	0.0547577	0.825961	NA	ANKRD24	ankyrin repeat domain 24
ENSG00000089876	0.241781	0.375076	0.633187	DHX32	DEAH-box helicase 32 (putative)
ENSG00000089902	-0.141313	0.581572	0.788601	RCOR1	REST corepressor 1
ENSG00000089916	0.585859	0.0142039	0.096397	GPATCH2L	G-patch domain containing 2 like
ENSG00000090006	-0.8305	0.013555	0.094092	LTBP4	latent transforming growth factor beta binding protein 4
ENSG00000090013	0.106638	0.712387	0.867228	BLVRB	biliverdin reductase B
ENSG00000090020	-0.307952	0.298268	0.561272	SLC9A1	solute carrier family 9 member A1
ENSG00000090054	0.353208	0.364612	0.623877	SPTLC1	serine palmitoyltransferase long chain base subunit 1
ENSG00000090060	-0.0782179	0.562958	0.777422	PAPOLA	poly(A) polymerase alpha
ENSG00000090061	-0.412493	0.0135308	0.0940122	CCNK	cyclin K
ENSG00000090097	-0.0145808	0.967427	0.987825	PCBP4	poly(rC) binding protein 4
ENSG00000090104	-0.408566	0.397047	0.65351	RGS1	regulator of G protein signaling 1
ENSG00000090238	-0.429945	0.0531561	0.208245	YPEL3	yippee like 3
ENSG00000090263	0.0126981	0.968994	0.988524	MRPS33	mitochondrial ribosomal protein S33
ENSG00000090266	-0.118164	0.640389	0.828177	NDUFB2	NADH:ubiquinone oxidoreductase subunit B2
ENSG00000090273	-0.41147	0.102177	0.305882	NUDC	nuclear distribution C, dynein complex regulator
ENSG00000090316	0.0784015	0.671632	0.845988	MAEA	macrophage erythroblast attacher
ENSG00000090339	-0.541089	0.15727	0.395483	ICAM1	intercellular adhesion molecule 1
ENSG00000090372	-0.837929	5.31814e-08	3.02616e-05	STRN4	striatin 4
ENSG00000090376	-0.352926	0.27145	0.535088	IRAK3	interleukin 1 receptor associated kinase 3
ENSG00000090382	0.105882	0.768165	0.898123	LYZ	lysozyme
ENSG00000090402	0.395207	0.339209	NA	SI	sucrase-isomaltase
ENSG00000090432	-0.566536	0.108782	0.316621	MUL1	mitochondrial E3 ubiquitin protein ligase 1
ENSG00000090447	0.388001	0.122023	0.338946	TFAP4	transcription factor AP-4
ENSG00000090470	0.0115587	0.970941	0.989086	PDCD7	programmed cell death 7
ENSG00000090487	0.0924673	0.540164	0.761593	SPG21	SPG21, maspardin
ENSG00000090512	0.0105823	0.96611	NA	FETUB	fetuin B
ENSG00000090520	-0.380546	0.02879	0.144925	DNAJB11	DnaJ heat shock protein family (Hsp40) member B11
ENSG00000090530	0.788359	0.0482518	0.196974	P3H2	prolyl 3-hydroxylase 2
ENSG00000090534	-0.154322	0.656614	NA	THPO	thrombopoietin
ENSG00000090539	-0.323215	0.388983	0.645921	CHRD	chordin
ENSG00000090554	-0.146472	0.586039	0.791226	FLT3LG	fms related tyrosine kinase 3 ligand
ENSG00000090565	0.251189	0.520089	0.749128	RAB11FIP3	RAB11 family interacting protein 3
ENSG00000090581	-0.0203029	0.911771	0.963824	GNPTG	N-acetylglucosamine-1-phosphate transferase subunit gamma
ENSG00000090612	0.57029	0.101782	0.305236	ZNF268	zinc finger protein 268
ENSG00000090615	0.488048	0.0210446	0.120461	GOLGA3	golgin A3
ENSG00000090621	-0.367549	0.106352	0.312756	PABPC4	poly(A) binding protein cytoplasmic 4
ENSG00000090659	-0.186833	0.530115	0.75577	CD209	CD209 molecule
ENSG00000090661	1.21966	0.0048228	0.0523875	CERS4	ceramide synthase 4
ENSG00000090674	0.536392	0.0908072	0.286007	MCOLN1	mucolipin 1
ENSG00000090686	-0.0432179	0.829036	0.925864	USP48	ubiquitin specific peptidase 48
ENSG00000090776	-0.550535	0.0569344	0.217918	EFNB1	ephrin B1
ENSG00000090857	-0.0686661	0.817972	0.921647	PDPR	pyruvate dehydrogenase phosphatase regulatory subunit
ENSG00000090861	0.166715	0.501382	0.735857	AARS	alanyl-tRNA synthetase
ENSG00000090863	0.213016	0.24751	0.50906	GLG1	golgi glycoprotein 1
ENSG00000090889	0.265851	0.489159	NA	KIF4A	kinesin family member 4A
ENSG00000090905	0.300935	0.0679313	0.241167	TNRC6A	trinucleotide repeat containing 6A
ENSG00000090924	0.872962	0.00247989	0.0363328	PLEKHG2	pleckstrin homology and RhoGEF domain containing G2
ENSG00000090932	0.0851732	0.732432	NA	DLL3	delta like canonical Notch ligand 3
ENSG00000090971	-0.0812483	0.860106	0.940828	NAT14	N-acetyltransferase 14 (putative)
ENSG00000090975	-0.596883	0.0577047	0.219661	PITPNM2	phosphatidylinositol transfer protein membrane associated 2
ENSG00000090989	0.0369253	0.875331	0.946839	EXOC1	exocyst complex component 1
ENSG00000091009	-0.236577	0.388856	0.645896	RBM27	RNA binding motif protein 27
ENSG00000091039	-0.0592152	0.785809	0.906611	OSBPL8	oxysterol binding protein like 8
ENSG00000091073	0.313481	0.503612	0.73787	DTX2	deltex E3 ubiquitin ligase 2
ENSG00000091106	0.286362	0.573664	NA	NLRC4	NLR family CARD domain containing 4
ENSG00000091127	-0.0742555	0.817257	0.921527	PUS7	pseudouridine synthase 7
ENSG00000091128	0.484192	0.303412	0.56551	LAMB4	laminin subunit beta 4
ENSG00000091129	0.136943	0.722282	NA	NRCAM	neuronal cell adhesion molecule
ENSG00000091136	-0.634559	0.00145756	0.0270259	LAMB1	laminin subunit beta 1
ENSG00000091137	0.148144	0.719418	0.870726	SLC26A4	solute carrier family 26 member 4
ENSG00000091138	0.0157317	0.94964	NA	SLC26A3	solute carrier family 26 member 3
ENSG00000091140	-0.167703	0.501816	0.736235	DLD	dihydrolipoamide dehydrogenase
ENSG00000091157	-0.243274	0.18096	0.428542	WDR7	WD repeat domain 7
ENSG00000091164	0.0611443	0.733607	0.87914	TXNL1	thioredoxin like 1
ENSG00000091181	0.172767	0.648719	0.833119	IL5RA	interleukin 5 receptor subunit alpha
ENSG00000091262	0.622687	0.04383	0.185696	ABCC6	ATP binding cassette subfamily C member 6
ENSG00000091317	-0.646037	0.0101513	0.0801701	CMTM6	CKLF like MARVEL transmembrane domain containing 6
ENSG00000091409	-0.320728	0.183318	0.431592	ITGA6	integrin subunit alpha 6
ENSG00000091428	-0.418498	0.213989	0.471163	RAPGEF4	Rap guanine nucleotide exchange factor 4
ENSG00000091436	-0.0586213	0.819402	0.922092	MAP3K20	mitogen-activated protein kinase kinase kinase 20
ENSG00000091482	-0.139297	0.597736	0.799728	SMPX	small muscle protein X-linked
ENSG00000091483	0.0203042	0.936628	0.975127	FH	fumarate hydratase
ENSG00000091490	-0.216039	0.591033	0.795355	SEL1L3	SEL1L family member 3
ENSG00000091513	0.690407	0.140255	0.369398	TF	transferrin
ENSG00000091527	-0.331362	0.105654	0.311639	CDV3	CDV3 homolog
ENSG00000091536	-0.165327	0.417003	0.670395	MYO15A	myosin XVA
ENSG00000091542	-0.718139	9.78757e-05	0.00587043	ALKBH5	alkB homolog 5, RNA demethylase
ENSG00000091583	1.07665	0.0325161	0.155752	APOH	apolipoprotein H
ENSG00000091592	0.815523	0.0138829	0.0952654	NLRP1	NLR family pyrin domain containing 1
ENSG00000091622	0.53798	0.283743	0.546737	PITPNM3	PITPNM family member 3
ENSG00000091640	-0.363546	0.0800963	0.265695	SPAG7	sperm associated antigen 7
ENSG00000091651	0.186433	0.423076	0.675943	ORC6	origin recognition complex subunit 6
ENSG00000091656	-0.56532	0.138391	0.36654	ZFHX4	zinc finger homeobox 4
ENSG00000091664	0.0721276	0.772146	NA	SLC17A6	solute carrier family 17 member 6
ENSG00000091704	0.326078	0.419479	NA	CPA1	carboxypeptidase A1
ENSG00000091732	0.0640856	0.807592	0.917294	ZC3HC1	zinc finger C3HC-type containing 1
ENSG00000091831	-0.302594	0.500435	0.73523	ESR1	estrogen receptor 1
ENSG00000091844	0.485238	0.193257	0.444707	RGS17	regulator of G protein signaling 17
ENSG00000091879	0.386158	0.0787304	0.263047	ANGPT2	angiopoietin 2
ENSG00000091947	-0.262678	0.362862	0.622304	TMEM101	transmembrane protein 101
ENSG00000091972	0.360846	0.34896	0.608814	CD200	CD200 molecule
ENSG00000091986	0.442873	0.23972	0.500457	CCDC80	coiled-coil domain containing 80
ENSG00000092009	-0.526083	0.301535	NA	CMA1	chymase 1
ENSG00000092010	-0.694836	8.70391e-06	0.00126246	PSME1	proteasome activator subunit 1
ENSG00000092020	0.00598864	0.983779	0.994534	PPP2R3C	protein phosphatase 2 regulatory subunit B''gamma
ENSG00000092036	-0.154471	0.58614	0.791258	HAUS4	HAUS augmin like complex subunit 4
ENSG00000092051	-0.189888	0.682088	NA	JPH4	junctophilin 4
ENSG00000092054	-0.0445563	0.875253	0.946813	MYH7	myosin heavy chain 7
ENSG00000092068	-1.117	0.00195294	0.0317042	SLC7A8	solute carrier family 7 member 8
ENSG00000092094	0.260991	0.319273	0.581192	OSGEP	O-sialoglycoprotein endopeptidase
ENSG00000092096	-0.40631	0.239631	0.500378	SLC22A17	solute carrier family 22 member 17
ENSG00000092098	-0.390954	0.260458	0.523453	RNF31	ring finger protein 31
ENSG00000092108	0.377656	0.117613	0.331147	SCFD1	sec1 family domain containing 1
ENSG00000092140	0.0175727	0.954485	0.983057	G2E3	G2/M-phase specific E3 ubiquitin protein ligase
ENSG00000092148	0.0992131	0.59055	0.79495	HECTD1	HECT domain E3 ubiquitin protein ligase 1
ENSG00000092199	-0.402138	0.00376311	0.0458599	HNRNPC	heterogeneous nuclear ribonucleoprotein C (C1/C2)
ENSG00000092200	0.445929	0.340751	0.601463	RPGRIP1	RPGR interacting protein 1
ENSG00000092201	0.27023	0.268074	0.531407	SUPT16H	SPT16 homolog, facilitates chromatin remodeling subunit
ENSG00000092203	0.222222	0.327064	0.588423	TOX4	TOX high mobility group box family member 4
ENSG00000092208	0.542227	0.0942025	0.291836	GEMIN2	gem nuclear organelle associated protein 2
ENSG00000092295	0.00271248	0.99131	NA	TGM1	transglutaminase 1
ENSG00000092330	-0.52104	0.0159701	0.102401	TINF2	TERF1 interacting nuclear factor 2
ENSG00000092377	0.0547577	0.825961	NA	TBL1Y	transducin beta like 1 Y-linked
ENSG00000092421	-0.223155	0.517845	0.747642	SEMA6A	semaphorin 6A
ENSG00000092439	0.570676	0.0124373	0.0897224	TRPM7	transient receptor potential cation channel subfamily M member 7
ENSG00000092445	-0.0840442	0.694478	0.858257	TYRO3	TYRO3 protein tyrosine kinase
ENSG00000092470	1.01058	0.00829923	0.0706199	WDR76	WD repeat domain 76
ENSG00000092529	0.937085	0.0321295	0.154735	CAPN3	calpain 3
ENSG00000092531	0.409186	0.0389398	0.173385	SNAP23	synaptosome associated protein 23
ENSG00000092607	-0.492108	0.195875	0.448546	TBX15	T-box 15
ENSG00000092621	-0.34575	0.437403	0.686627	PHGDH	phosphoglycerate dehydrogenase
ENSG00000092758	-0.939367	0.0503829	0.202261	COL9A3	collagen type IX alpha 3 chain
ENSG00000092820	-0.342697	0.0793651	0.264318	EZR	ezrin
ENSG00000092841	-0.10365	0.636363	0.824941	MYL6	myosin light chain 6
ENSG00000092847	-0.201138	0.392655	0.649654	AGO1	argonaute 1, RISC catalytic component
ENSG00000092850	0.430123	0.390809	NA	TEKT2	tektin 2
ENSG00000092853	0.501537	0.1883	0.43853	CLSPN	claspin
ENSG00000092871	0.647349	0.00575367	0.0579137	RFFL	ring finger and FYVE like domain containing E3 ubiquitin protein ligase
ENSG00000092929	0.881172	0.0055795	0.0571918	UNC13D	unc-13 homolog D
ENSG00000092931	0.112152	0.627241	0.819821	MFSD11	major facilitator superfamily domain containing 11
ENSG00000092964	-0.556652	0.00453909	0.0505789	DPYSL2	dihydropyrimidinase like 2
ENSG00000092969	0.454524	0.339921	0.601004	TGFB2	transforming growth factor beta 2
ENSG00000092978	0.140244	0.538176	0.760423	GPATCH2	G-patch domain containing 2
ENSG00000093000	0.465701	0.057599	0.219515	NUP50	nucleoporin 50
ENSG00000093009	0.0686394	0.782873	NA	CDC45	cell division cycle 45
ENSG00000093010	-0.519544	0.00416238	0.048261	COMT	catechol-O-methyltransferase
ENSG00000093072	-0.420537	0.117735	0.33136	ADA2	adenosine deaminase 2
ENSG00000093100	-0.133534	0.744038	0.884918	NA	NA
ENSG00000093134	0.147382	0.771508	0.899654	VNN3	vanin 3
ENSG00000093144	-0.230241	0.294742	0.557956	ECHDC1	ethylmalonyl-CoA decarboxylase 1
ENSG00000093167	-0.252415	0.233232	0.492848	LRRFIP2	LRR binding FLII interacting protein 2
ENSG00000093183	0.306424	0.160982	0.400624	SEC22C	SEC22 homolog C, vesicle trafficking protein
ENSG00000093217	0.893657	0.0333333	0.157759	XYLB	xylulokinase
ENSG00000094631	-0.0603215	0.791597	0.908842	HDAC6	histone deacetylase 6
ENSG00000094755	0.757043	0.131097	0.354036	GABRP	gamma-aminobutyric acid type A receptor pi subunit
ENSG00000094804	0.48739	0.298568	0.56162	CDC6	cell division cycle 6
ENSG00000094841	-0.178315	0.603576	0.804207	UPRT	uracil phosphoribosyltransferase homolog
ENSG00000094880	-0.374701	0.120615	0.336393	CDC23	cell division cycle 23
ENSG00000094914	-0.552465	0.0691083	0.243514	AAAS	aladin WD repeat nucleoporin
ENSG00000094916	-0.148685	0.223861	0.481854	CBX5	chromobox 5
ENSG00000094963	-0.400991	0.134836	0.360734	FMO2	flavin containing monooxygenase 2
ENSG00000094975	0.239316	0.320944	0.583181	SUCO	SUN domain containing ossification factor
ENSG00000095002	-0.0501007	0.818586	0.921807	MSH2	mutS homolog 2
ENSG00000095015	-0.256482	0.334529	0.596463	MAP3K1	mitogen-activated protein kinase kinase kinase 1
ENSG00000095059	-0.0396013	0.895589	0.955478	DHPS	deoxyhypusine synthase
ENSG00000095066	0.670044	0.0176093	0.108308	HOOK2	hook microtubule tethering protein 2
ENSG00000095110	0.0721276	0.772146	NA	NXPE1	neurexophilin and PC-esterase domain family member 1
ENSG00000095139	-0.211681	0.223802	0.481854	ARCN1	archain 1
ENSG00000095203	0.533833	0.172215	0.41686	EPB41L4B	erythrocyte membrane protein band 4.1 like 4B
ENSG00000095209	-0.0372749	0.880513	0.949159	TMEM38B	transmembrane protein 38B
ENSG00000095261	-0.392868	0.0604961	0.225825	PSMD5	proteasome 26S subunit, non-ATPase 5
ENSG00000095303	-0.0802976	0.858723	0.940518	PTGS1	prostaglandin-endoperoxide synthase 1
ENSG00000095319	-0.0334454	0.906615	0.961556	NUP188	nucleoporin 188
ENSG00000095321	-0.587141	0.0475476	0.195561	CRAT	carnitine O-acetyltransferase
ENSG00000095370	-1.30437	4.23198e-13	1.04351e-09	SH2D3C	SH2 domain containing 3C
ENSG00000095380	-0.0911581	0.690264	0.856673	NANS	N-acetylneuraminate synthase
ENSG00000095383	-0.665296	0.190705	NA	TBC1D2	TBC1 domain family member 2
ENSG00000095397	0.900715	0.0751132	NA	WHRN	whirlin
ENSG00000095464	0.272171	0.592008	NA	PDE6C	phosphodiesterase 6C
ENSG00000095485	0.812405	0.00142441	0.026653	CWF19L1	CWF19 like cell cycle control factor 1
ENSG00000095539	-0.13018	0.798197	NA	SEMA4G	semaphorin 4G
ENSG00000095564	0.306458	0.22306	0.481392	BTAF1	B-TFIID TATA-box binding protein associated factor 1
ENSG00000095574	0.102462	0.767207	0.897373	IKZF5	IKAROS family zinc finger 5
ENSG00000095585	0.534537	0.288028	0.551595	BLNK	B cell linker
ENSG00000095587	1.09753	8.5741e-06	0.00125182	TLL2	tolloid like 2
ENSG00000095596	0.0999423	0.785985	NA	CYP26A1	cytochrome P450 family 26 subfamily A member 1
ENSG00000095627	0.0872204	0.850343	0.936283	TDRD1	tudor domain containing 1
ENSG00000095637	-0.0535744	0.846667	0.935252	SORBS1	sorbin and SH3 domain containing 1
ENSG00000095713	0.156916	0.757053	0.892008	CRTAC1	cartilage acidic protein 1
[truncated: 39,541 more rows]
