# Supplementary material for: H3K27ac acetylome signatures reveal the epigenomic reorganization in remodeled non-failing human hearts
Source: Clin Epigenetics. 2020 Jul 14;12:106. doi: 10.1186/s13148-020-00895-5 (PMC7362435; doi:10.1186/s13148-020-00895-5)
Supplement: Supplementary file 11 — Additional file 11. Supplementary Table 5. Identified transcription binding motifs from differentially acetylated regions. [file 13148_2020_895_MOESM11_ESM.xlsx]

## Sheet: Supplementary Table 5
Supplementary Table 5. Identified transcription binding motifs from differentially acetylated regions
Motif ID	Binding Regions	Non-adjusted p-value	Ajusted p-value
SMAD1_HUMAN.H10MO.D	Hyperacetylation	9.04e-80	5.8e-77
NFIC_HUMAN.H10MO.A	Hyperacetylation	7.28e-68	4.66e-65
TFCP2_HUMAN.H10MO.D	Hyperacetylation	2.58e-66	1.65e-63
IKZF1_HUMAN.H10MO.C	Hyperacetylation	2.61e-62	1.67e-59
PLAG1_HUMAN.H10MO.D	Hyperacetylation	6.82e-62	4.37e-59
ETV4_HUMAN.H10MO.B	Hyperacetylation	2.38e-60	1.53e-57
SMAD3_HUMAN.H10MO.C	Hyperacetylation	1.38e-59	8.87e-57
IRF4_HUMAN.H10MO.C	Hyperacetylation	1.53e-58	9.78e-56
SRBP2_HUMAN.H10MO.B	Hyperacetylation	4.45e-57	2.85e-54
SPIC_HUMAN.H10MO.D	Hyperacetylation	5.56e-57	3.56e-54
AP2A_HUMAN.H10MO.C	Hyperacetylation	1.07e-56	6.85e-54
ETS2_HUMAN.H10MO.C	Hyperacetylation	1.32e-56	8.47e-54
PLAG1_HUMAN.H10MO.S	Hyperacetylation	1.48e-55	9.51e-53
PURA_HUMAN.H10MO.D	Hyperacetylation	1.7e-55	1.09e-52
EHF_HUMAN.H10MO.C	Hyperacetylation	3.36e-55	2.16e-52
ETV1_HUMAN.H10MO.B	Hyperacetylation	3.9e-55	2.5e-52
AP2C_HUMAN.H10MO.A	Hyperacetylation	9.11e-55	5.84e-52
FLI1_HUMAN.H10MO.A	Hyperacetylation	1.88e-54	1.21e-51
ZN148_HUMAN.H10MO.D	Hyperacetylation	3.12e-54	2e-51
EGR1_HUMAN.H10MO.A	Hyperacetylation	4.05e-53	2.59e-50
MNT_HUMAN.H10MO.D	Hyperacetylation	3.2e-51	2.05e-48
KLF15_HUMAN.H10MO.D	Hyperacetylation	6.48e-49	4.16e-46
MZF1_HUMAN.H10MO.D	Hyperacetylation	1.41e-47	9.06e-45
ERR1_HUMAN.H10MO.D	Hyperacetylation	6.95e-47	4.45e-44
ELF2_HUMAN.H10MO.C	Hyperacetylation	7.63e-47	4.89e-44
TBX15_HUMAN.H10MO.D	Hyperacetylation	1.41e-46	9.04e-44
ZIC2_HUMAN.H10MO.C	Hyperacetylation	2.12e-46	1.36e-43
ZFX_HUMAN.H10MO.C	Hyperacetylation	2.46e-46	1.58e-43
VDR_HUMAN.H10MO.B	Hyperacetylation	2.1e-45	1.35e-42
ZIC1_HUMAN.H10MO.B	Hyperacetylation	2.58e-45	1.66e-42
ASCL2_HUMAN.H10MO.D	Hyperacetylation	1.66e-44	1.06e-41
NFIA_HUMAN.H10MO.S	Hyperacetylation	1.74e-44	1.11e-41
SP3_HUMAN.H10MO.B	Hyperacetylation	2.25e-44	1.44e-41
NFIA_HUMAN.H10MO.C	Hyperacetylation	2.57e-44	1.65e-41
E2F6_HUMAN.H10MO.C	Hyperacetylation	2.76e-44	1.77e-41
BC11A_HUMAN.H10MO.C	Hyperacetylation	6.5e-44	4.17e-41
ZBT7A_HUMAN.H10MO.D	Hyperacetylation	1.35e-43	8.67e-41
GABP1_HUMAN.H10MO.C	Hyperacetylation	1.4e-43	8.98e-41
SP1_HUMAN.H10MO.C	Hyperacetylation	8.05e-43	5.16e-40
AP2B_HUMAN.H10MO.B	Hyperacetylation	2.64e-42	1.69e-39
YBOX1_HUMAN.H10MO.D	Hyperacetylation	6.71e-42	4.3e-39
SUH_HUMAN.H10MO.C	Hyperacetylation	7.77e-42	4.98e-39
KLF1_HUMAN.H10MO.C	Hyperacetylation	1.26e-41	8.1e-39
ZN740_HUMAN.H10MO.D	Hyperacetylation	1.8e-41	1.15e-38
PAX5_HUMAN.H10MO.S	Hyperacetylation	2.02e-41	1.3e-38
ETS1_HUMAN.H10MO.C	Hyperacetylation	3.18e-41	2.04e-38
COE1_HUMAN.H10MO.A	Hyperacetylation	5.32e-41	3.41e-38
KLF4_HUMAN.H10MO.A	Hyperacetylation	1.37e-40	8.78e-38
SP1_HUMAN.H10MO.S	Hyperacetylation	1.58e-40	1.01e-37
PLAL1_HUMAN.H10MO.D	Hyperacetylation	2.89e-40	1.85e-37
TBX1_HUMAN.H10MO.D	Hyperacetylation	5.2e-40	3.33e-37
KLF16_HUMAN.H10MO.D	Hyperacetylation	6.23e-40	3.99e-37
PKNX2_HUMAN.H10MO.D	Hyperacetylation	8.14e-40	5.22e-37
PROX1_HUMAN.H10MO.D	Hyperacetylation	1.49e-39	9.52e-37
MAZ_HUMAN.H10MO.A	Hyperacetylation	1.31e-38	8.39e-36
P73_HUMAN.H10MO.S	Hyperacetylation	3.59e-38	2.3e-35
KLF6_HUMAN.H10MO.D	Hyperacetylation	2.29e-37	1.47e-34
NR2C2_HUMAN.H10MO.A	Hyperacetylation	1.24e-35	7.92e-33
COT2_HUMAN.H10MO.S	Hyperacetylation	3.14e-35	2.01e-32
ELF1_HUMAN.H10MO.A	Hyperacetylation	1.12e-34	7.16e-32
HAND1_HUMAN.H10MO.D	Hyperacetylation	3.1e-34	1.99e-31
NFKB1_HUMAN.H10MO.B	Hyperacetylation	4.28e-34	2.75e-31
SMRC1_HUMAN.H10MO.D	Hyperacetylation	6.53e-34	4.19e-31
SP2_HUMAN.H10MO.C	Hyperacetylation	1.36e-33	8.73e-31
BACH1_HUMAN.H10MO.A	Hyperacetylation	2.17e-33	1.39e-30
TFDP1_HUMAN.H10MO.D	Hyperacetylation	3.76e-33	2.41e-30
TFAP4_HUMAN.H10MO.C	Hyperacetylation	7.02e-33	4.5e-30
NR0B1_HUMAN.H10MO.D	Hyperacetylation	2.13e-32	1.36e-29
SMAD4_HUMAN.H10MO.C	Hyperacetylation	4.14e-32	2.66e-29
NR5A2_HUMAN.H10MO.C	Hyperacetylation	1.78e-31	1.14e-28
SRBP1_HUMAN.H10MO.B	Hyperacetylation	2.03e-31	1.3e-28
SMAD2_HUMAN.H10MO.C	Hyperacetylation	7.57e-31	4.85e-28
GCR_HUMAN.H10MO.S	Hyperacetylation	1.12e-30	7.19e-28
MAFA_HUMAN.H10MO.D	Hyperacetylation	1.79e-30	1.15e-27
ZEP2_HUMAN.H10MO.D	Hyperacetylation	2.54e-30	1.63e-27
ARNT2_HUMAN.H10MO.D	Hyperacetylation	3e-30	1.92e-27
SP4_HUMAN.H10MO.D	Hyperacetylation	2.57e-29	1.65e-26
EGR2_HUMAN.H10MO.C	Hyperacetylation	3.96e-29	2.54e-26
WT1_HUMAN.H10MO.D	Hyperacetylation	7.66e-29	4.91e-26
ELK3_HUMAN.H10MO.D	Hyperacetylation	8.65e-29	5.54e-26
ELK1_HUMAN.H10MO.A	Hyperacetylation	1.29e-28	8.27e-26
GABPA_HUMAN.H10MO.A	Hyperacetylation	2.32e-28	1.49e-25
CLOCK_HUMAN.H10MO.D	Hyperacetylation	2.56e-28	1.64e-25
KLF3_HUMAN.H10MO.D	Hyperacetylation	1.68e-27	1.08e-24
TF65_HUMAN.H10MO.A	Hyperacetylation	3.99e-27	2.56e-24
PPARA_HUMAN.H10MO.C	Hyperacetylation	5.73e-27	3.67e-24
GLI1_HUMAN.H10MO.C	Hyperacetylation	9.06e-27	5.81e-24
COT2_HUMAN.H10MO.A	Hyperacetylation	1e-26	6.44e-24
RFX5_HUMAN.H10MO.A	Hyperacetylation	1.2e-26	7.72e-24
FEV_HUMAN.H10MO.C	Hyperacetylation	1.24e-26	7.94e-24
UBIP1_HUMAN.H10MO.D	Hyperacetylation	2.18e-26	1.4e-23
GLIS3_HUMAN.H10MO.D	Hyperacetylation	2.45e-26	1.57e-23
MAF_HUMAN.H10MO.B	Hyperacetylation	3.41e-26	2.18e-23
EGR4_HUMAN.H10MO.D	Hyperacetylation	6.1e-26	3.91e-23
MYOG_HUMAN.H10MO.D	Hyperacetylation	1.87e-25	1.2e-22
HTF4_HUMAN.H10MO.B	Hyperacetylation	2.47e-25	1.58e-22
ELF3_HUMAN.H10MO.D	Hyperacetylation	3.78e-25	2.42e-22
ZN219_HUMAN.H10MO.D	Hyperacetylation	4.32e-25	2.77e-22
HLTF_HUMAN.H10MO.D	Hyperacetylation	6.84e-25	4.38e-22
ESR2_HUMAN.H10MO.S	Hyperacetylation	1.41e-24	9.06e-22
ESR2_HUMAN.H10MO.A	Hyperacetylation	1.71e-24	1.1e-21
ZIC3_HUMAN.H10MO.C	Hyperacetylation	5.83e-24	3.74e-21
REL_HUMAN.H10MO.C	Hyperacetylation	1.37e-23	8.75e-21
THAP1_HUMAN.H10MO.D	Hyperacetylation	3.09e-23	1.98e-20
ETV5_HUMAN.H10MO.D	Hyperacetylation	3.96e-23	2.54e-20
ESR1_HUMAN.H10MO.S	Hyperacetylation	5.34e-23	3.43e-20
TFE2_HUMAN.H10MO.C	Hyperacetylation	7.05e-23	4.52e-20
P63_HUMAN.H10MO.S	Hyperacetylation	7.23e-23	4.64e-20
IRF8_HUMAN.H10MO.D	Hyperacetylation	7.29e-23	4.67e-20
STAT3_HUMAN.H10MO.A	Hyperacetylation	8.45e-23	5.42e-20
EHF_HUMAN.H10MO.S	Hyperacetylation	9.04e-23	5.8e-20
ZN350_HUMAN.H10MO.C	Hyperacetylation	1.07e-22	6.89e-20
RUNX2_HUMAN.H10MO.B	Hyperacetylation	1.17e-22	7.49e-20
MYF6_HUMAN.H10MO.C	Hyperacetylation	2.28e-22	1.46e-19
RREB1_HUMAN.H10MO.D	Hyperacetylation	2.68e-22	1.72e-19
ELK4_HUMAN.H10MO.A	Hyperacetylation	3.96e-22	2.54e-19
E2F1_HUMAN.H10MO.A	Hyperacetylation	1.23e-21	7.91e-19
PPARD_HUMAN.H10MO.D	Hyperacetylation	1.92e-21	1.23e-18
RELB_HUMAN.H10MO.C	Hyperacetylation	3.22e-21	2.06e-18
STF1_HUMAN.H10MO.B	Hyperacetylation	3.63e-21	2.33e-18
FOXK1_HUMAN.H10MO.D	Hyperacetylation	3.78e-21	2.42e-18
P73_HUMAN.H10MO.A	Hyperacetylation	5.18e-21	3.32e-18
ZN143_HUMAN.H10MO.A	Hyperacetylation	3.2e-20	2.05e-17
HNF4G_HUMAN.H10MO.C	Hyperacetylation	3.47e-20	2.22e-17
KLF8_HUMAN.H10MO.C	Hyperacetylation	3.62e-20	2.32e-17
MAFB_HUMAN.H10MO.D	Hyperacetylation	4.09e-20	2.62e-17
SRF_HUMAN.H10MO.A	Hyperacetylation	4.45e-20	2.85e-17
HEN1_HUMAN.H10MO.C	Hyperacetylation	1.11e-19	7.14e-17
EPAS1_HUMAN.H10MO.D	Hyperacetylation	1.82e-19	1.17e-16
MYOD1_HUMAN.H10MO.C	Hyperacetylation	2.2e-19	1.41e-16
COT1_HUMAN.H10MO.S	Hyperacetylation	6.2e-19	3.98e-16
NDF1_HUMAN.H10MO.C	Hyperacetylation	1.45e-18	9.31e-16
THA_HUMAN.H10MO.C	Hyperacetylation	1.57e-18	1.01e-15
RARB_HUMAN.H10MO.D	Hyperacetylation	1.63e-18	1.04e-15
HNF4A_HUMAN.H10MO.A	Hyperacetylation	2.16e-18	1.38e-15
PPARG_HUMAN.H10MO.A	Hyperacetylation	2.65e-18	1.7e-15
IRX2_HUMAN.H10MO.D	Hyperacetylation	3.32e-18	2.13e-15
NR2F6_HUMAN.H10MO.D	Hyperacetylation	9.45e-18	6.06e-15
KLF12_HUMAN.H10MO.D	Hyperacetylation	1.82e-17	1.17e-14
ZEP1_HUMAN.H10MO.D	Hyperacetylation	2e-17	1.28e-14
SPI1_HUMAN.H10MO.A	Hyperacetylation	2.46e-17	1.58e-14
PAX5_HUMAN.H10MO.A	Hyperacetylation	4.16e-17	2.66e-14
THB_HUMAN.H10MO.C	Hyperacetylation	4.34e-17	2.78e-14
RXRA_HUMAN.H10MO.C	Hyperacetylation	6.18e-17	3.96e-14
TEAD4_HUMAN.H10MO.A	Hyperacetylation	1.34e-16	8.56e-14
GSC2_HUMAN.H10MO.D	Hyperacetylation	1.35e-16	8.68e-14
ZBT18_HUMAN.H10MO.D	Hyperacetylation	2.52e-16	1.62e-13
SOX4_HUMAN.H10MO.C	Hyperacetylation	4.94e-16	3.17e-13
INSM1_HUMAN.H10MO.C	Hyperacetylation	5.61e-16	3.6e-13
TLX1_HUMAN.H10MO.D	Hyperacetylation	8.66e-16	5.55e-13
PEBB_HUMAN.H10MO.C	Hyperacetylation	1.64e-15	1.05e-12
PRGR_HUMAN.H10MO.S	Hyperacetylation	2.37e-15	1.52e-12
NF2L2_HUMAN.H10MO.D	Hyperacetylation	3.05e-15	1.95e-12
RUNX1_HUMAN.H10MO.A	Hyperacetylation	3.08e-15	1.98e-12
PTF1A_HUMAN.H10MO.C	Hyperacetylation	3.34e-15	2.14e-12
RARA_HUMAN.H10MO.C	Hyperacetylation	5.33e-15	3.42e-12
P63_HUMAN.H10MO.A	Hyperacetylation	6.42e-15	4.11e-12
ETV7_HUMAN.H10MO.D	Hyperacetylation	7.1e-15	4.55e-12
HES1_HUMAN.H10MO.D	Hyperacetylation	8.66e-15	5.55e-12
ETV6_HUMAN.H10MO.D	Hyperacetylation	9e-15	5.77e-12
GLI3_HUMAN.H10MO.B	Hyperacetylation	1.13e-14	7.26e-12
STAT2_HUMAN.H10MO.B	Hyperacetylation	2.06e-14	1.32e-11
TGIF1_HUMAN.H10MO.D	Hyperacetylation	2.32e-14	1.49e-11
ZN639_HUMAN.H10MO.D	Hyperacetylation	2.63e-14	1.69e-11
ESR1_HUMAN.H10MO.A	Hyperacetylation	2.66e-14	1.71e-11
NFAC2_HUMAN.H10MO.B	Hyperacetylation	2.69e-14	1.73e-11
HIC2_HUMAN.H10MO.D	Hyperacetylation	3.17e-14	2.03e-11
NFAC3_HUMAN.H10MO.B	Hyperacetylation	4.08e-14	2.61e-11
BHE41_HUMAN.H10MO.D	Hyperacetylation	7.88e-14	5.05e-11
GCR_HUMAN.H10MO.A	Hyperacetylation	8.97e-14	5.75e-11
NFAC4_HUMAN.H10MO.C	Hyperacetylation	1.02e-13	6.55e-11
NKX21_HUMAN.H10MO.D	Hyperacetylation	1.09e-13	6.96e-11
P53_HUMAN.H10MO.B	Hyperacetylation	1.67e-13	1.07e-10
KAISO_HUMAN.H10MO.S	Hyperacetylation	1.75e-13	1.12e-10
ZKSC1_HUMAN.H10MO.C	Hyperacetylation	2.69e-13	1.73e-10
ZBTB6_HUMAN.H10MO.D	Hyperacetylation	2.91e-13	1.87e-10
THB_HUMAN.H10MO.S	Hyperacetylation	3.76e-13	2.41e-10
NFE2_HUMAN.H10MO.B	Hyperacetylation	7.52e-13	4.82e-10
GCM1_HUMAN.H10MO.D	Hyperacetylation	9.63e-13	6.17e-10
E2F4_HUMAN.H10MO.A	Hyperacetylation	1.5e-12	9.63e-10
PRGR_HUMAN.H10MO.C	Hyperacetylation	1.68e-12	1.08e-09
NRL_HUMAN.H10MO.D	Hyperacetylation	2.02e-12	1.29e-09
NFKB2_HUMAN.H10MO.D	Hyperacetylation	2.64e-12	1.69e-09
EGR1_HUMAN.H10MO.S	Hyperacetylation	3.44e-12	2.2e-09
ANDR_HUMAN.H10MO.A	Hyperacetylation	3.91e-12	2.51e-09
RXRB_HUMAN.H10MO.C	Hyperacetylation	4.01e-12	2.57e-09
RARG_HUMAN.H10MO.C	Hyperacetylation	4.54e-12	2.91e-09
STAT4_HUMAN.H10MO.D	Hyperacetylation	7.67e-12	4.92e-09
NR4A1_HUMAN.H10MO.C	Hyperacetylation	8.38e-12	5.37e-09
PPARA_HUMAN.H10MO.S	Hyperacetylation	1.04e-11	6.65e-09
EGR3_HUMAN.H10MO.D	Hyperacetylation	2.14e-11	1.37e-08
NR4A2_HUMAN.H10MO.C	Hyperacetylation	2.27e-11	1.45e-08
HSF1_HUMAN.H10MO.A	Hyperacetylation	3.56e-11	2.28e-08
HIC1_HUMAN.H10MO.C	Hyperacetylation	3.74e-11	2.39e-08
COT1_HUMAN.H10MO.B	Hyperacetylation	4.48e-11	2.87e-08
AP2D_HUMAN.H10MO.D	Hyperacetylation	5.01e-11	3.21e-08
ELF5_HUMAN.H10MO.D	Hyperacetylation	5.29e-11	3.39e-08
RFX1_HUMAN.H10MO.C	Hyperacetylation	7.91e-11	5.07e-08
NR2C1_HUMAN.H10MO.C	Hyperacetylation	1.05e-10	6.75e-08
HEY2_HUMAN.H10MO.D	Hyperacetylation	1.17e-10	7.49e-08
ZN713_HUMAN.H10MO.D	Hyperacetylation	1.28e-10	8.17e-08
ID4_HUMAN.H10MO.D	Hyperacetylation	1.62e-10	1.04e-07
SPDEF_HUMAN.H10MO.D	Hyperacetylation	1.62e-10	1.04e-07
JUNB_HUMAN.H10MO.C	Hyperacetylation	1.8e-10	1.15e-07
MECP2_HUMAN.H10MO.C	Hyperacetylation	2.18e-10	1.4e-07
IRF1_HUMAN.H10MO.A	Hyperacetylation	3.12e-10	2e-07
REST_HUMAN.H10MO.A	Hyperacetylation	3.38e-10	2.17e-07
RFX2_HUMAN.H10MO.C	Hyperacetylation	3.66e-10	2.35e-07
STAT1_HUMAN.H10MO.S	Hyperacetylation	3.74e-10	2.4e-07
E2F8_HUMAN.H10MO.D	Hyperacetylation	4.72e-10	3.02e-07
BATF_HUMAN.H10MO.S	Hyperacetylation	4.89e-10	3.14e-07
ZN282_HUMAN.H10MO.D	Hyperacetylation	5.15e-10	3.3e-07
TF7L1_HUMAN.H10MO.D	Hyperacetylation	6e-10	3.84e-07
RUNX3_HUMAN.H10MO.C	Hyperacetylation	6.15e-10	3.94e-07
ZIC4_HUMAN.H10MO.D	Hyperacetylation	6.53e-10	4.19e-07
TWST1_HUMAN.H10MO.D	Hyperacetylation	1.07e-09	6.83e-07
SPIB_HUMAN.H10MO.B	Hyperacetylation	1.34e-09	8.6e-07
HESX1_HUMAN.H10MO.D	Hyperacetylation	3.02e-09	1.93e-06
ZKSC3_HUMAN.H10MO.D	Hyperacetylation	3.06e-09	1.96e-06
FOSB_HUMAN.H10MO.C	Hyperacetylation	3.18e-09	2.04e-06
RHXF1_HUMAN.H10MO.D	Hyperacetylation	3.37e-09	2.16e-06
FOS_HUMAN.H10MO.A	Hyperacetylation	4.39e-09	2.81e-06
RARA_HUMAN.H10MO.S	Hyperacetylation	4.39e-09	2.81e-06
MLXPL_HUMAN.H10MO.D	Hyperacetylation	5.84e-09	3.74e-06
FOSL1_HUMAN.H10MO.A	Hyperacetylation	6.36e-09	4.08e-06
FOSL2_HUMAN.H10MO.A	Hyperacetylation	6.41e-09	4.11e-06
NFAC1_HUMAN.H10MO.S	Hyperacetylation	7.27e-09	4.66e-06
TFE3_HUMAN.H10MO.C	Hyperacetylation	8.18e-09	5.24e-06
ZBT7B_HUMAN.H10MO.D	Hyperacetylation	8.18e-09	5.24e-06
RARG_HUMAN.H10MO.S	Hyperacetylation	1.03e-08	6.63e-06
GLIS1_HUMAN.H10MO.D	Hyperacetylation	1.35e-08	8.65e-06
IRF3_HUMAN.H10MO.C	Hyperacetylation	1.72e-08	1.1e-05
NFYC_HUMAN.H10MO.B	Hyperacetylation	1.77e-08	1.13e-05
ERG_HUMAN.H10MO.B	Hyperacetylation	2.3e-08	1.47e-05
MAFK_HUMAN.H10MO.S	Hyperacetylation	2.33e-08	1.5e-05
STAT1_HUMAN.H10MO.A	Hyperacetylation	3.37e-08	2.16e-05
ZEB1_HUMAN.H10MO.B	Hyperacetylation	3.38e-08	2.17e-05
STA5A_HUMAN.H10MO.B	Hyperacetylation	4.01e-08	2.57e-05
GLIS2_HUMAN.H10MO.D	Hyperacetylation	4.35e-08	2.79e-05
MAFG_HUMAN.H10MO.C	Hyperacetylation	4.37e-08	2.8e-05
ZBTB4_HUMAN.H10MO.D	Hyperacetylation	7.67e-08	4.91e-05
NR1H4_HUMAN.H10MO.C	Hyperacetylation	8.67e-08	5.55e-05
VDR_HUMAN.H10MO.S	Hyperacetylation	9.56e-08	6.13e-05
STA5B_HUMAN.H10MO.C	Hyperacetylation	1.38e-07	8.86e-05
ZN524_HUMAN.H10MO.D	Hyperacetylation	1.73e-07	0.000111
MCR_HUMAN.H10MO.D	Hyperacetylation	1.85e-07	0.000119
CR3L1_HUMAN.H10MO.D	Hyperacetylation	2.1e-07	0.000134
NFAT5_HUMAN.H10MO.D	Hyperacetylation	2.53e-07	0.000162
NR1I3_HUMAN.H10MO.C	Hyperacetylation	2.82e-07	0.000181
MESP1_HUMAN.H10MO.D	Hyperacetylation	3.19e-07	0.000204
THA_HUMAN.H10MO.S	Hyperacetylation	3.68e-07	0.000236
HXB2_HUMAN.H10MO.D	Hyperacetylation	4.48e-07	0.000287
PPARG_HUMAN.H10MO.S	Hyperacetylation	4.88e-07	0.000313
NKX32_HUMAN.H10MO.C	Hyperacetylation	4.93e-07	0.000316
TBX20_HUMAN.H10MO.D	Hyperacetylation	5.22e-07	0.000334
FOXO4_HUMAN.H10MO.C	Hyperacetylation	5.27e-07	0.000338
ENOA_HUMAN.H10MO.A	Hyperacetylation	5.48e-07	0.000351
NR1I2_HUMAN.H10MO.C	Hyperacetylation	6.65e-07	0.000426
HSF4_HUMAN.H10MO.D	Hyperacetylation	9.35e-07	0.000599
TEAD1_HUMAN.H10MO.D	Hyperacetylation	9.68e-07	0.00062
MBD2_HUMAN.H10MO.B	Hyperacetylation	1.02e-06	0.000656
JUND_HUMAN.H10MO.A	Hyperacetylation	1.13e-06	0.000725
JUN_HUMAN.H10MO.A	Hyperacetylation	1.14e-06	0.000728
FIGLA_HUMAN.H10MO.D	Hyperacetylation	1.19e-06	0.000763
PRDM4_HUMAN.H10MO.D	Hyperacetylation	1.19e-06	0.000765
BHE23_HUMAN.H10MO.D	Hyperacetylation	1.35e-06	0.000862
KLF14_HUMAN.H10MO.D	Hyperacetylation	1.45e-06	0.00093
NKX28_HUMAN.H10MO.C	Hyperacetylation	1.61e-06	0.00103
ERR2_HUMAN.H10MO.A	Hyperacetylation	1.72e-06	0.0011
MAX_HUMAN.H10MO.A	Hyperacetylation	1.75e-06	0.00112
USF2_HUMAN.H10MO.A	Hyperacetylation	1.84e-06	0.00118
ZSCA4_HUMAN.H10MO.D	Hyperacetylation	2.5e-06	0.0016
ZN423_HUMAN.H10MO.D	Hyperacetylation	2.58e-06	0.00165
MTF1_HUMAN.H10MO.C	Hyperacetylation	2.6e-06	0.00167
PRDM1_HUMAN.H10MO.C	Hyperacetylation	2.89e-06	0.00185
SOX15_HUMAN.H10MO.D	Hyperacetylation	3.67e-06	0.00235
NFAC1_HUMAN.H10MO.A	Hyperacetylation	3.71e-06	0.00237
GATA1_HUMAN.H10MO.A	Hyperacetylation	3.74e-06	0.0024
HES7_HUMAN.H10MO.D	Hyperacetylation	4e-06	0.00256
LEF1_HUMAN.H10MO.C	Hyperacetylation	4.75e-06	0.00304
IRF2_HUMAN.H10MO.C	Hyperacetylation	4.86e-06	0.00311
MITF_HUMAN.H10MO.C	Hyperacetylation	5.33e-06	0.00341
TBX2_HUMAN.H10MO.D	Hyperacetylation	9.15e-06	0.00585
BHA15_HUMAN.H10MO.D	Hyperacetylation	9.58e-06	0.00612
HXB1_HUMAN.H10MO.D	Hyperacetylation	1.2e-05	0.00765
SNAI1_HUMAN.H10MO.C	Hyperacetylation	1.27e-05	0.00808
RFX3_HUMAN.H10MO.B	Hyperacetylation	1.28e-05	0.00817
FOXO3_HUMAN.H10MO.B	Hyperacetylation	1.55e-05	0.0099
SOX10_HUMAN.H10MO.D	Hyperacetylation	1.61e-05	0.0103
ZN784_HUMAN.H10MO.D	Hyperacetylation	1.85e-05	0.0118
MAFF_HUMAN.H10MO.A	Hyperacetylation	1.94e-05	0.0124
GLI2_HUMAN.H10MO.B	Hyperacetylation	2.19e-05	0.0139
KLF13_HUMAN.H10MO.D	Hyperacetylation	2.26e-05	0.0144
HES5_HUMAN.H10MO.D	Hyperacetylation	2.27e-05	0.0145
NR1I3_HUMAN.H10MO.S	Hyperacetylation	2.41e-05	0.0154
EOMES_HUMAN.H10MO.D	Hyperacetylation	2.49e-05	0.0158
FOXH1_HUMAN.H10MO.A	Hyperacetylation	3.47e-05	0.022
HXA1_HUMAN.H10MO.C	Hyperacetylation	4.35e-05	0.0275
ZN384_HUMAN.H10MO.C	Hyperacetylation	4.4e-05	0.0278
TFDP1_HUMAN.H10MO.S	Hyperacetylation	5.67e-05	0.0357
TAL1_HUMAN.H10MO.S	Hyperacetylation	5.79e-05	0.0365
ITF2_HUMAN.H10MO.B	Hyperacetylation	5.92e-05	0.0372
TBX3_HUMAN.H10MO.D	Hyperacetylation	6.12e-05	0.0385
USF1_HUMAN.H10MO.A	Hyperacetylation	6.9e-05	0.0433
E2F3_HUMAN.H10MO.B	Hypoacetylation	2.90E-321	1.86E-318
TFDP1_HUMAN.H10MO.D	Hypoacetylation	6.87E-310	4.4e-307
SP4_HUMAN.H10MO.D	Hypoacetylation	1.13e-293	7.25e-291
SP2_HUMAN.H10MO.C	Hypoacetylation	3.14e-278	2.01e-275
MBD2_HUMAN.H10MO.B	Hypoacetylation	4.07e-254	2.61e-251
MAZ_HUMAN.H10MO.A	Hypoacetylation	1.05e-250	6.71e-248
MECP2_HUMAN.H10MO.C	Hypoacetylation	7.03e-248	4.51e-245
SP1_HUMAN.H10MO.C	Hypoacetylation	2.01e-241	1.29e-238
SP3_HUMAN.H10MO.B	Hypoacetylation	7.03e-241	4.5e-238
THAP1_HUMAN.H10MO.D	Hypoacetylation	5.67e-240	3.63e-237
EGR1_HUMAN.H10MO.S	Hypoacetylation	6.77e-240	4.34e-237
SP1_HUMAN.H10MO.S	Hypoacetylation	3.23e-239	2.07e-236
E2F2_HUMAN.H10MO.B	Hypoacetylation	2.13e-232	1.37e-229
E2F1_HUMAN.H10MO.A	Hypoacetylation	1.53e-221	9.78e-219
ZN639_HUMAN.H10MO.D	Hypoacetylation	5.93e-220	3.8e-217
WT1_HUMAN.H10MO.D	Hypoacetylation	1.78e-217	1.14e-214
EGR4_HUMAN.H10MO.D	Hypoacetylation	9.26e-191	5.94e-188
KLF13_HUMAN.H10MO.D	Hypoacetylation	3.37e-188	2.16e-185
E2F6_HUMAN.H10MO.C	Hypoacetylation	9.83e-188	6.3e-185
ELF2_HUMAN.H10MO.C	Hypoacetylation	9.27e-186	5.94e-183
KAISO_HUMAN.H10MO.A	Hypoacetylation	1.68e-185	1.08e-182
NRF1_HUMAN.H10MO.A	Hypoacetylation	5.26e-183	3.37e-180
E2F4_HUMAN.H10MO.A	Hypoacetylation	2.36e-181	1.51e-178
KLF14_HUMAN.H10MO.D	Hypoacetylation	3.21e-179	2.06e-176
AP2D_HUMAN.H10MO.D	Hypoacetylation	1.18e-169	7.53e-167
KLF6_HUMAN.H10MO.D	Hypoacetylation	3.09e-166	1.98e-163
ETV1_HUMAN.H10MO.B	Hypoacetylation	9.63e-165	6.18e-162
EGR2_HUMAN.H10MO.C	Hypoacetylation	8.77e-162	5.62e-159
KLF16_HUMAN.H10MO.D	Hypoacetylation	1.57e-160	1e-157
ZN148_HUMAN.H10MO.D	Hypoacetylation	3.3e-159	2.11e-156
GABPA_HUMAN.H10MO.A	Hypoacetylation	1.48e-155	9.47e-153
KLF4_HUMAN.H10MO.A	Hypoacetylation	4.46e-155	2.86e-152
ZFX_HUMAN.H10MO.C	Hypoacetylation	1.54e-153	9.84e-151
ARNT_HUMAN.H10MO.B	Hypoacetylation	9.38e-140	6.02e-137
EGR1_HUMAN.H10MO.A	Hypoacetylation	9.09e-138	5.83e-135
TBX15_HUMAN.H10MO.D	Hypoacetylation	2.03e-137	1.3e-134
GABP1_HUMAN.H10MO.C	Hypoacetylation	2.05e-137	1.31e-134
HIF1A_HUMAN.H10MO.A	Hypoacetylation	7.16e-137	4.59e-134
ZN219_HUMAN.H10MO.D	Hypoacetylation	3.99e-135	2.56e-132
AHR_HUMAN.H10MO.B	Hypoacetylation	3.06e-134	1.96e-131
ELF1_HUMAN.H10MO.A	Hypoacetylation	7.53e-132	4.83e-129
NR0B1_HUMAN.H10MO.D	Hypoacetylation	1.33e-130	8.55e-128
ETV6_HUMAN.H10MO.D	Hypoacetylation	1.08e-129	6.94e-127
ELK4_HUMAN.H10MO.A	Hypoacetylation	6.09e-125	3.91e-122
TF7L1_HUMAN.H10MO.D	Hypoacetylation	8.2e-124	5.25e-121
KLF15_HUMAN.H10MO.D	Hypoacetylation	1.26e-119	8.06e-117
E2F5_HUMAN.H10MO.B	Hypoacetylation	1.93e-117	1.24e-114
E4F1_HUMAN.H10MO.D	Hypoacetylation	3.3e-117	2.12e-114
TFDP1_HUMAN.H10MO.S	Hypoacetylation	2.84e-115	1.82e-112
TBX1_HUMAN.H10MO.D	Hypoacetylation	1.27e-114	8.12e-112
GMEB2_HUMAN.H10MO.D	Hypoacetylation	5.83e-114	3.74e-111
ELK1_HUMAN.H10MO.A	Hypoacetylation	5.15e-112	3.3e-109
CLOCK_HUMAN.H10MO.D	Hypoacetylation	9.64e-109	6.18e-106
AP2B_HUMAN.H10MO.B	Hypoacetylation	6.92e-108	4.43e-105
FLI1_HUMAN.H10MO.A	Hypoacetylation	1.87e-107	1.2e-104
HEY2_HUMAN.H10MO.D	Hypoacetylation	1.26e-106	8.05e-104
ETS2_HUMAN.H10MO.C	Hypoacetylation	1.65e-101	1.06e-98
ERG_HUMAN.H10MO.B	Hypoacetylation	2.37e-100	1.52e-97
PROX1_HUMAN.H10MO.D	Hypoacetylation	6.86e-100	4.4e-97
CXXC1_HUMAN.H10MO.D	Hypoacetylation	7.43e-100	4.76e-97
PURA_HUMAN.H10MO.D	Hypoacetylation	7.92e-100	5.07e-97
NFYB_HUMAN.H10MO.A	Hypoacetylation	1.21e-91	7.78e-89
PAX5_HUMAN.H10MO.A	Hypoacetylation	3.48e-91	2.23e-88
NFYA_HUMAN.H10MO.A	Hypoacetylation	5.55e-91	3.56e-88
ZBTB4_HUMAN.H10MO.S	Hypoacetylation	6.45e-86	4.14e-83
TYY2_HUMAN.H10MO.D	Hypoacetylation	2.58e-85	1.66e-82
ZN384_HUMAN.H10MO.C	Hypoacetylation	6.51e-78	4.17e-75
HINFP_HUMAN.H10MO.C	Hypoacetylation	6.82e-78	4.37e-75
ZEP2_HUMAN.H10MO.D	Hypoacetylation	6.26e-76	4.02e-73
IRF3_HUMAN.H10MO.C	Hypoacetylation	3.01e-75	1.93e-72
FOXI1_HUMAN.H10MO.B	Hypoacetylation	2.02e-73	1.29e-70
CEBPZ_HUMAN.H10MO.D	Hypoacetylation	7.5e-73	4.81e-70
PLAG1_HUMAN.H10MO.D	Hypoacetylation	5.69e-72	3.65e-69
RFX2_HUMAN.H10MO.C	Hypoacetylation	1.01e-69	6.49e-67
MLX_HUMAN.H10MO.D	Hypoacetylation	3.31e-68	2.12e-65
ARNT2_HUMAN.H10MO.D	Hypoacetylation	7.05e-68	4.52e-65
EHF_HUMAN.H10MO.C	Hypoacetylation	2.85e-67	1.83e-64
E2F7_HUMAN.H10MO.D	Hypoacetylation	4.62e-67	2.96e-64
ATF6A_HUMAN.H10MO.B	Hypoacetylation	5.55e-67	3.56e-64
CREB1_HUMAN.H10MO.A	Hypoacetylation	8.38e-67	5.37e-64
MYCN_HUMAN.H10MO.B	Hypoacetylation	3.14e-65	2.01e-62
BATF3_HUMAN.H10MO.D	Hypoacetylation	5.89e-65	3.78e-62
CREB3_HUMAN.H10MO.D	Hypoacetylation	7.51e-64	4.82e-61
PBX3_HUMAN.H10MO.B	Hypoacetylation	1.03e-62	6.6e-60
ZBT7B_HUMAN.H10MO.D	Hypoacetylation	1.21e-62	7.77e-60
CR3L2_HUMAN.H10MO.D	Hypoacetylation	1.3e-62	8.36e-60
SPZ1_HUMAN.H10MO.D	Hypoacetylation	3.68e-62	2.36e-59
STAT2_HUMAN.H10MO.B	Hypoacetylation	1.04e-61	6.68e-59
JDP2_HUMAN.H10MO.D	Hypoacetylation	1.05e-60	6.75e-58
ATF2_HUMAN.H10MO.B	Hypoacetylation	2.3e-60	1.47e-57
CREB5_HUMAN.H10MO.D	Hypoacetylation	6.99e-60	4.48e-57
IRF8_HUMAN.H10MO.D	Hypoacetylation	1.93e-59	1.23e-56
RREB1_HUMAN.H10MO.D	Hypoacetylation	4.14e-59	2.65e-56
ZN524_HUMAN.H10MO.D	Hypoacetylation	2.05e-58	1.31e-55
EGR3_HUMAN.H10MO.D	Hypoacetylation	4.59e-58	2.94e-55
EPAS1_HUMAN.H10MO.D	Hypoacetylation	1.08e-57	6.95e-55
NFYC_HUMAN.H10MO.B	Hypoacetylation	1.91e-57	1.22e-54
ELK3_HUMAN.H10MO.D	Hypoacetylation	6.28e-56	4.03e-53
FEV_HUMAN.H10MO.C	Hypoacetylation	7.59e-55	4.87e-52
SPIB_HUMAN.H10MO.B	Hypoacetylation	1.18e-54	7.54e-52
HES1_HUMAN.H10MO.D	Hypoacetylation	1.02e-53	6.55e-51
NFAC4_HUMAN.H10MO.C	Hypoacetylation	1.04e-53	6.7e-51
ATF7_HUMAN.H10MO.D	Hypoacetylation	2.34e-53	1.5e-50
E2F8_HUMAN.H10MO.D	Hypoacetylation	4.55e-52	2.91e-49
IRF1_HUMAN.H10MO.A	Hypoacetylation	7.65e-52	4.9e-49
IRF2_HUMAN.H10MO.C	Hypoacetylation	8.06e-52	5.17e-49
ZN740_HUMAN.H10MO.D	Hypoacetylation	2.2e-51	1.41e-48
EHF_HUMAN.H10MO.S	Hypoacetylation	2.48e-51	1.59e-48
KAISO_HUMAN.H10MO.S	Hypoacetylation	1.05e-50	6.74e-48
IRF7_HUMAN.H10MO.C	Hypoacetylation	6.93e-50	4.44e-47
TFEB_HUMAN.H10MO.C	Hypoacetylation	1.03e-49	6.59e-47
IRF4_HUMAN.H10MO.C	Hypoacetylation	1.41e-49	9.02e-47
ASCL2_HUMAN.H10MO.D	Hypoacetylation	3.63e-48	2.33e-45
CPEB1_HUMAN.H10MO.D	Hypoacetylation	4.87e-47	3.12e-44
CREM_HUMAN.H10MO.C	Hypoacetylation	8.98e-47	5.76e-44
GSC2_HUMAN.H10MO.D	Hypoacetylation	2.23e-46	1.43e-43
TYY1_HUMAN.H10MO.A	Hypoacetylation	1.25e-45	8.04e-43
CENPB_HUMAN.H10MO.D	Hypoacetylation	1.38e-45	8.83e-43
KLF12_HUMAN.H10MO.D	Hypoacetylation	1.55e-45	9.92e-43
GCM2_HUMAN.H10MO.D	Hypoacetylation	2.86e-45	1.83e-42
KLF1_HUMAN.H10MO.C	Hypoacetylation	2.96e-45	1.9e-42
USF2_HUMAN.H10MO.A	Hypoacetylation	5.52e-45	3.54e-42
MYBA_HUMAN.H10MO.D	Hypoacetylation	5.8e-44	3.72e-41
ZIC4_HUMAN.H10MO.D	Hypoacetylation	2.02e-43	1.3e-40
ZBT7A_HUMAN.H10MO.D	Hypoacetylation	3.36e-43	2.15e-40
ETS1_HUMAN.H10MO.C	Hypoacetylation	1.58e-42	1.01e-39
SPDEF_HUMAN.H10MO.D	Hypoacetylation	8e-42	5.13e-39
GSC_HUMAN.H10MO.D	Hypoacetylation	9.54e-42	6.12e-39
MZF1_HUMAN.H10MO.D	Hypoacetylation	1.53e-41	9.78e-39
XBP1_HUMAN.H10MO.C	Hypoacetylation	3.3e-41	2.11e-38
ZN350_HUMAN.H10MO.C	Hypoacetylation	9.95e-41	6.38e-38
HEY1_HUMAN.H10MO.D	Hypoacetylation	8.28e-40	5.31e-37
ARI3A_HUMAN.H10MO.S	Hypoacetylation	3.59e-39	2.3e-36
FOXJ3_HUMAN.H10MO.S	Hypoacetylation	1.56e-38	1e-35
ATF1_HUMAN.H10MO.B	Hypoacetylation	2.64e-38	1.7e-35
BC11A_HUMAN.H10MO.C	Hypoacetylation	3.32e-38	2.13e-35
FOXJ3_HUMAN.H10MO.A	Hypoacetylation	3.88e-38	2.49e-35
ZN589_HUMAN.H10MO.D	Hypoacetylation	4.21e-38	2.7e-35
ZIC1_HUMAN.H10MO.B	Hypoacetylation	4.74e-38	3.04e-35
HOMEZ_HUMAN.H10MO.D	Hypoacetylation	8.26e-38	5.3e-35
AP2C_HUMAN.H10MO.A	Hypoacetylation	8.27e-38	5.3e-35
HXA11_HUMAN.H10MO.D	Hypoacetylation	1.6e-37	1.03e-34
BMAL1_HUMAN.H10MO.C	Hypoacetylation	5.64e-37	3.62e-34
BHE40_HUMAN.H10MO.A	Hypoacetylation	3.04e-36	1.95e-33
ENOA_HUMAN.H10MO.A	Hypoacetylation	5.03e-36	3.23e-33
MEF2C_HUMAN.H10MO.C	Hypoacetylation	5.09e-36	3.26e-33
FUBP1_HUMAN.H10MO.D	Hypoacetylation	1.11e-35	7.14e-33
GRHL1_HUMAN.H10MO.D	Hypoacetylation	1.31e-35	8.41e-33
IRF9_HUMAN.H10MO.C	Hypoacetylation	1.4e-35	8.95e-33
BHE41_HUMAN.H10MO.D	Hypoacetylation	4.65e-35	2.98e-32
DPRX_HUMAN.H10MO.D	Hypoacetylation	7.39e-35	4.73e-32
NFAC2_HUMAN.H10MO.B	Hypoacetylation	1.42e-34	9.09e-32
HMBX1_HUMAN.H10MO.D	Hypoacetylation	1.95e-34	1.25e-31
YBOX1_HUMAN.H10MO.D	Hypoacetylation	2.48e-34	1.59e-31
HLF_HUMAN.H10MO.C	Hypoacetylation	2.89e-34	1.85e-31
MYC_HUMAN.H10MO.A	Hypoacetylation	4.21e-34	2.7e-31
ETV7_HUMAN.H10MO.D	Hypoacetylation	9.27e-34	5.94e-31
RFX5_HUMAN.H10MO.A	Hypoacetylation	1.06e-33	6.77e-31
FOXJ2_HUMAN.H10MO.C	Hypoacetylation	1.25e-33	8.02e-31
ERR1_HUMAN.H10MO.D	Hypoacetylation	1.89e-33	1.21e-30
FOXO1_HUMAN.H10MO.C	Hypoacetylation	6.3e-33	4.04e-30
NFKB1_HUMAN.H10MO.B	Hypoacetylation	6.32e-33	4.05e-30
PAX5_HUMAN.H10MO.S	Hypoacetylation	6.87e-33	4.4e-30
FOXD3_HUMAN.H10MO.D	Hypoacetylation	1.68e-32	1.08e-29
NFAC3_HUMAN.H10MO.B	Hypoacetylation	2.74e-32	1.76e-29
BPTF_HUMAN.H10MO.D	Hypoacetylation	3.06e-32	1.96e-29
ATF3_HUMAN.H10MO.A	Hypoacetylation	5.73e-32	3.68e-29
MYB_HUMAN.H10MO.C	Hypoacetylation	7.36e-32	4.72e-29
ZBED1_HUMAN.H10MO.D	Hypoacetylation	1.1e-31	7.05e-29
MTF1_HUMAN.H10MO.C	Hypoacetylation	1.25e-31	7.98e-29
PITX1_HUMAN.H10MO.D	Hypoacetylation	1.68e-31	1.07e-28
NFIL3_HUMAN.H10MO.C	Hypoacetylation	1.76e-31	1.13e-28
PRDM1_HUMAN.H10MO.C	Hypoacetylation	1.95e-31	1.25e-28
RELB_HUMAN.H10MO.C	Hypoacetylation	3.02e-31	1.93e-28
GLIS1_HUMAN.H10MO.D	Hypoacetylation	3.72e-31	2.38e-28
ONEC3_HUMAN.H10MO.D	Hypoacetylation	8.69e-31	5.57e-28
HXC13_HUMAN.H10MO.D	Hypoacetylation	1.38e-30	8.86e-28
CR3L1_HUMAN.H10MO.D	Hypoacetylation	1.51e-30	9.69e-28
FOXO4_HUMAN.H10MO.C	Hypoacetylation	1.72e-30	1.1e-27
SPI1_HUMAN.H10MO.A	Hypoacetylation	1.86e-30	1.19e-27
HESX1_HUMAN.H10MO.D	Hypoacetylation	2.69e-30	1.73e-27
SPIC_HUMAN.H10MO.D	Hypoacetylation	3.05e-30	1.96e-27
RFX3_HUMAN.H10MO.B	Hypoacetylation	4.33e-30	2.78e-27
HSFY1_HUMAN.H10MO.D	Hypoacetylation	1.21e-29	7.78e-27
ZBTB6_HUMAN.H10MO.D	Hypoacetylation	1.63e-29	1.05e-26
GFI1_HUMAN.H10MO.C	Hypoacetylation	1.67e-29	1.07e-26
ZIC2_HUMAN.H10MO.C	Hypoacetylation	3.02e-29	1.94e-26
FOXK1_HUMAN.H10MO.D	Hypoacetylation	3.46e-29	2.22e-26
HES5_HUMAN.H10MO.D	Hypoacetylation	4.81e-29	3.08e-26
ZN713_HUMAN.H10MO.D	Hypoacetylation	5.67e-29	3.63e-26
OTX1_HUMAN.H10MO.D	Hypoacetylation	6.57e-29	4.21e-26
SRBP2_HUMAN.H10MO.B	Hypoacetylation	1.16e-28	7.43e-26
GLIS3_HUMAN.H10MO.D	Hypoacetylation	1.4e-28	8.98e-26
INSM1_HUMAN.H10MO.C	Hypoacetylation	1.45e-28	9.27e-26
MNT_HUMAN.H10MO.D	Hypoacetylation	1.75e-28	1.12e-25
MEF2B_HUMAN.H10MO.D	Hypoacetylation	2.57e-28	1.65e-25
FOXL1_HUMAN.H10MO.D	Hypoacetylation	2.87e-28	1.84e-25
REL_HUMAN.H10MO.C	Hypoacetylation	3.47e-28	2.23e-25
BCL6B_HUMAN.H10MO.D	Hypoacetylation	3.8e-28	2.43e-25
PRDM4_HUMAN.H10MO.D	Hypoacetylation	6.04e-28	3.87e-25
HEN1_HUMAN.H10MO.C	Hypoacetylation	7.36e-28	4.72e-25
GLIS2_HUMAN.H10MO.D	Hypoacetylation	8.13e-28	5.21e-25
FOXD2_HUMAN.H10MO.D	Hypoacetylation	1.25e-27	7.99e-25
OTX2_HUMAN.H10MO.C	Hypoacetylation	1.35e-27	8.66e-25
HXC10_HUMAN.H10MO.D	Hypoacetylation	2.12e-27	1.36e-24
TFCP2_HUMAN.H10MO.D	Hypoacetylation	2.71e-27	1.74e-24
ZBTB4_HUMAN.H10MO.D	Hypoacetylation	3.52e-27	2.25e-24
STAT3_HUMAN.H10MO.A	Hypoacetylation	4.46e-27	2.86e-24
ARI3A_HUMAN.H10MO.D	Hypoacetylation	6.53e-27	4.19e-24
HXC12_HUMAN.H10MO.D	Hypoacetylation	1.26e-26	8.06e-24
BARH2_HUMAN.H10MO.D	Hypoacetylation	2.34e-26	1.5e-23
BARH1_HUMAN.H10MO.D	Hypoacetylation	2.58e-26	1.65e-23
HES7_HUMAN.H10MO.D	Hypoacetylation	2.7e-26	1.73e-23
PAX3_HUMAN.H10MO.D	Hypoacetylation	3.7e-26	2.37e-23
HMGA2_HUMAN.H10MO.D	Hypoacetylation	5.36e-26	3.44e-23
BARX1_HUMAN.H10MO.D	Hypoacetylation	6.1e-26	3.91e-23
BACH1_HUMAN.H10MO.A	Hypoacetylation	1.15e-25	7.34e-23
MEF2A_HUMAN.H10MO.A	Hypoacetylation	1.4e-25	8.98e-23
MEF2D_HUMAN.H10MO.C	Hypoacetylation	1.41e-25	9.02e-23
FOXO3_HUMAN.H10MO.B	Hypoacetylation	1.96e-25	1.25e-22
PLAG1_HUMAN.H10MO.S	Hypoacetylation	2.71e-25	1.74e-22
HXD12_HUMAN.H10MO.D	Hypoacetylation	3.65e-25	2.34e-22
HXB13_HUMAN.H10MO.D	Hypoacetylation	3.97e-25	2.55e-22
RFX1_HUMAN.H10MO.C	Hypoacetylation	4.22e-25	2.7e-22
ZN784_HUMAN.H10MO.D	Hypoacetylation	4.5e-25	2.89e-22
USF1_HUMAN.H10MO.A	Hypoacetylation	5.79e-25	3.71e-22
ZN232_HUMAN.H10MO.D	Hypoacetylation	1.3e-24	8.31e-22
SHOX_HUMAN.H10MO.D	Hypoacetylation	1.53e-24	9.78e-22
ZEP1_HUMAN.H10MO.D	Hypoacetylation	2.06e-24	1.32e-21
KLF8_HUMAN.H10MO.C	Hypoacetylation	2.2e-24	1.41e-21
ELF5_HUMAN.H10MO.D	Hypoacetylation	2.49e-24	1.6e-21
PLAL1_HUMAN.H10MO.D	Hypoacetylation	5.07e-24	3.25e-21
STAT1_HUMAN.H10MO.S	Hypoacetylation	5.65e-24	3.62e-21
NKX32_HUMAN.H10MO.C	Hypoacetylation	6.2e-24	3.97e-21
SHOX2_HUMAN.H10MO.D	Hypoacetylation	7.56e-24	4.84e-21
TF65_HUMAN.H10MO.A	Hypoacetylation	1.11e-23	7.1e-21
NFAC1_HUMAN.H10MO.S	Hypoacetylation	1.13e-23	7.26e-21
DLX4_HUMAN.H10MO.D	Hypoacetylation	1.83e-23	1.17e-20
MUSC_HUMAN.H10MO.D	Hypoacetylation	2.15e-23	1.38e-20
FOXG1_HUMAN.H10MO.D	Hypoacetylation	3.11e-23	1.99e-20
ALX4_HUMAN.H10MO.D	Hypoacetylation	3.12e-23	2e-20
NR1H2_HUMAN.H10MO.D	Hypoacetylation	4.29e-23	2.75e-20
CEBPB_HUMAN.H10MO.A	Hypoacetylation	4.92e-23	3.16e-20
DLX5_HUMAN.H10MO.D	Hypoacetylation	6.39e-23	4.1e-20
BRAC_HUMAN.H10MO.D	Hypoacetylation	6.7e-23	4.3e-20
ETV4_HUMAN.H10MO.B	Hypoacetylation	6.72e-23	4.31e-20
VAX1_HUMAN.H10MO.D	Hypoacetylation	7.5e-23	4.81e-20
IRF5_HUMAN.H10MO.D	Hypoacetylation	1.24e-22	7.94e-20
LMX1A_HUMAN.H10MO.D	Hypoacetylation	1.49e-22	9.58e-20
SOX4_HUMAN.H10MO.C	Hypoacetylation	2.05e-22	1.31e-19
LHX8_HUMAN.H10MO.D	Hypoacetylation	2.47e-22	1.58e-19
HXA13_HUMAN.H10MO.C	Hypoacetylation	2.78e-22	1.78e-19
TFAP4_HUMAN.H10MO.C	Hypoacetylation	2.84e-22	1.82e-19
ZN143_HUMAN.H10MO.A	Hypoacetylation	7.54e-22	4.83e-19
RXRG_HUMAN.H10MO.B	Hypoacetylation	8.11e-22	5.2e-19
HSF4_HUMAN.H10MO.D	Hypoacetylation	1e-21	6.44e-19
NFAC1_HUMAN.H10MO.A	Hypoacetylation	1.02e-21	6.53e-19
ZN652_HUMAN.H10MO.D	Hypoacetylation	1.97e-21	1.26e-18
GATA1_HUMAN.H10MO.S	Hypoacetylation	2.08e-21	1.33e-18
CEBPA_HUMAN.H10MO.A	Hypoacetylation	2.25e-21	1.44e-18
NR2C2_HUMAN.H10MO.A	Hypoacetylation	2.43e-21	1.56e-18
HIC1_HUMAN.H10MO.C	Hypoacetylation	3.87e-21	2.48e-18
MAX_HUMAN.H10MO.A	Hypoacetylation	3.97e-21	2.55e-18
LHX6_HUMAN.H10MO.D	Hypoacetylation	5.31e-21	3.4e-18
LMX1B_HUMAN.H10MO.D	Hypoacetylation	6.42e-21	4.12e-18
SOX7_HUMAN.H10MO.D	Hypoacetylation	8.71e-21	5.58e-18
EVX1_HUMAN.H10MO.D	Hypoacetylation	1.44e-20	9.25e-18
NKX31_HUMAN.H10MO.C	Hypoacetylation	1.48e-20	9.49e-18
VSX2_HUMAN.H10MO.D	Hypoacetylation	1.51e-20	9.68e-18
HMX3_HUMAN.H10MO.D	Hypoacetylation	1.75e-20	1.12e-17
PO6F1_HUMAN.H10MO.D	Hypoacetylation	2.13e-20	1.37e-17
PAX7_HUMAN.H10MO.D	Hypoacetylation	3.31e-20	2.12e-17
MEIS2_HUMAN.H10MO.B	Hypoacetylation	3.83e-20	2.45e-17
ERR3_HUMAN.H10MO.B	Hypoacetylation	4.73e-20	3.03e-17
ESX1_HUMAN.H10MO.D	Hypoacetylation	4.85e-20	3.11e-17
SRBP1_HUMAN.H10MO.B	Hypoacetylation	5.04e-20	3.23e-17
DRGX_HUMAN.H10MO.D	Hypoacetylation	5.39e-20	3.46e-17
HMX1_HUMAN.H10MO.D	Hypoacetylation	5.98e-20	3.84e-17
MNX1_HUMAN.H10MO.D	Hypoacetylation	6e-20	3.84e-17
BRCA1_HUMAN.H10MO.D	Hypoacetylation	6.66e-20	4.27e-17
DMBX1_HUMAN.H10MO.D	Hypoacetylation	6.8e-20	4.36e-17
SRY_HUMAN.H10MO.B	Hypoacetylation	6.84e-20	4.38e-17
CDC5L_HUMAN.H10MO.D	Hypoacetylation	8.94e-20	5.73e-17
PRRX1_HUMAN.H10MO.D	Hypoacetylation	9.45e-20	6.06e-17
PITX3_HUMAN.H10MO.D	Hypoacetylation	1.11e-19	7.12e-17
ISX_HUMAN.H10MO.D	Hypoacetylation	1.15e-19	7.38e-17
CUX2_HUMAN.H10MO.D	Hypoacetylation	1.21e-19	7.79e-17
HXB2_HUMAN.H10MO.D	Hypoacetylation	1.73e-19	1.11e-16
ZN410_HUMAN.H10MO.D	Hypoacetylation	1.83e-19	1.18e-16
HME1_HUMAN.H10MO.D	Hypoacetylation	2.11e-19	1.35e-16
RFX4_HUMAN.H10MO.D	Hypoacetylation	2.44e-19	1.56e-16
ARX_HUMAN.H10MO.D	Hypoacetylation	2.47e-19	1.58e-16
GBX1_HUMAN.H10MO.D	Hypoacetylation	2.49e-19	1.59e-16
FOXQ1_HUMAN.H10MO.C	Hypoacetylation	2.49e-19	1.6e-16
ZKSC3_HUMAN.H10MO.D	Hypoacetylation	3.47e-19	2.23e-16
PAX8_HUMAN.H10MO.D	Hypoacetylation	4.99e-19	3.2e-16
CDX2_HUMAN.H10MO.C	Hypoacetylation	6.07e-19	3.89e-16
NKX22_HUMAN.H10MO.D	Hypoacetylation	6.09e-19	3.9e-16
ITF2_HUMAN.H10MO.B	Hypoacetylation	6.17e-19	3.96e-16
ZN333_HUMAN.H10MO.D	Hypoacetylation	7.5e-19	4.81e-16
MGAP_HUMAN.H10MO.D	Hypoacetylation	7.92e-19	5.08e-16
AP2A_HUMAN.H10MO.C	Hypoacetylation	1.48e-18	9.5e-16
PAX1_HUMAN.H10MO.D	Hypoacetylation	1.98e-18	1.27e-15
RARA_HUMAN.H10MO.S	Hypoacetylation	2.5e-18	1.6e-15
STAT4_HUMAN.H10MO.D	Hypoacetylation	3.57e-18	2.29e-15
PO4F3_HUMAN.H10MO.D	Hypoacetylation	3.96e-18	2.54e-15
DUXA_HUMAN.H10MO.D	Hypoacetylation	4.31e-18	2.76e-15
DDIT3_HUMAN.H10MO.C	Hypoacetylation	9.53e-18	6.11e-15
ZN282_HUMAN.H10MO.D	Hypoacetylation	1.11e-17	7.1e-15
PO4F1_HUMAN.H10MO.D	Hypoacetylation	1.3e-17	8.33e-15
ZN423_HUMAN.H10MO.D	Hypoacetylation	1.45e-17	9.32e-15
PO2F2_HUMAN.H10MO.D	Hypoacetylation	1.75e-17	1.12e-14
FOXP3_HUMAN.H10MO.D	Hypoacetylation	1.99e-17	1.27e-14
LHX9_HUMAN.H10MO.D	Hypoacetylation	2.25e-17	1.44e-14
HXC6_HUMAN.H10MO.D	Hypoacetylation	2.32e-17	1.48e-14
NFAT5_HUMAN.H10MO.D	Hypoacetylation	2.33e-17	1.49e-14
FOXO6_HUMAN.H10MO.D	Hypoacetylation	2.63e-17	1.69e-14
LHX3_HUMAN.H10MO.C	Hypoacetylation	3.59e-17	2.3e-14
NR2F6_HUMAN.H10MO.D	Hypoacetylation	5.15e-17	3.3e-14
TCF7_HUMAN.H10MO.C	Hypoacetylation	5.77e-17	3.7e-14
FOXF2_HUMAN.H10MO.D	Hypoacetylation	5.86e-17	3.76e-14
TBX19_HUMAN.H10MO.D	Hypoacetylation	6.36e-17	4.08e-14
EVX2_HUMAN.H10MO.A	Hypoacetylation	7.56e-17	4.85e-14
PAX2_HUMAN.H10MO.S	Hypoacetylation	8.17e-17	5.24e-14
LBX2_HUMAN.H10MO.D	Hypoacetylation	9.24e-17	5.92e-14
SOX17_HUMAN.H10MO.D	Hypoacetylation	9.48e-17	6.08e-14
PHX2A_HUMAN.H10MO.D	Hypoacetylation	1.21e-16	7.75e-14
CEBPG_HUMAN.H10MO.C	Hypoacetylation	1.24e-16	7.95e-14
HXC11_HUMAN.H10MO.D	Hypoacetylation	1.26e-16	8.06e-14
PO3F3_HUMAN.H10MO.D	Hypoacetylation	1.4e-16	8.97e-14
NKX61_HUMAN.H10MO.D	Hypoacetylation	1.46e-16	9.39e-14
ELF3_HUMAN.H10MO.D	Hypoacetylation	1.47e-16	9.45e-14
CEBPE_HUMAN.H10MO.A	Hypoacetylation	2.09e-16	1.34e-13
ZSCA4_HUMAN.H10MO.D	Hypoacetylation	2.28e-16	1.46e-13
STAT1_HUMAN.H10MO.A	Hypoacetylation	2.5e-16	1.6e-13
FOXC1_HUMAN.H10MO.C	Hypoacetylation	2.88e-16	1.84e-13
HNF1A_HUMAN.H10MO.A	Hypoacetylation	3.01e-16	1.93e-13
OLIG1_HUMAN.H10MO.D	Hypoacetylation	3.14e-16	2.01e-13
LEF1_HUMAN.H10MO.C	Hypoacetylation	3.34e-16	2.14e-13
BHE22_HUMAN.H10MO.D	Hypoacetylation	3.4e-16	2.18e-13
DLX3_HUMAN.H10MO.C	Hypoacetylation	3.42e-16	2.19e-13
TEF_HUMAN.H10MO.D	Hypoacetylation	3.69e-16	2.37e-13
SOX1_HUMAN.H10MO.D	Hypoacetylation	4.4e-16	2.82e-13
REST_HUMAN.H10MO.A	Hypoacetylation	6.73e-16	4.31e-13
ERF_HUMAN.H10MO.D	Hypoacetylation	7.38e-16	4.73e-13
RX_HUMAN.H10MO.D	Hypoacetylation	7.67e-16	4.92e-13
PO3F4_HUMAN.H10MO.D	Hypoacetylation	8.26e-16	5.3e-13
MSX1_HUMAN.H10MO.D	Hypoacetylation	8.73e-16	5.6e-13
RARB_HUMAN.H10MO.D	Hypoacetylation	9.52e-16	6.1e-13
TBP_HUMAN.H10MO.C	Hypoacetylation	1.03e-15	6.62e-13
SCRT2_HUMAN.H10MO.D	Hypoacetylation	1.1e-15	7.07e-13
FOXA3_HUMAN.H10MO.C	Hypoacetylation	1.11e-15	7.1e-13
VDR_HUMAN.H10MO.B	Hypoacetylation	1.27e-15	8.16e-13
HMX2_HUMAN.H10MO.D	Hypoacetylation	1.44e-15	9.22e-13
HXA9_HUMAN.H10MO.D	Hypoacetylation	1.65e-15	1.06e-12
PEBB_HUMAN.H10MO.C	Hypoacetylation	1.75e-15	1.12e-12
NR2E1_HUMAN.H10MO.D	Hypoacetylation	2.18e-15	1.4e-12
ONEC2_HUMAN.H10MO.D	Hypoacetylation	2.9e-15	1.86e-12
PRD14_HUMAN.H10MO.C	Hypoacetylation	3.36e-15	2.15e-12
FOXF1_HUMAN.H10MO.D	Hypoacetylation	4.04e-15	2.59e-12
STAT6_HUMAN.H10MO.C	Hypoacetylation	4.11e-15	2.63e-12
FOXD1_HUMAN.H10MO.D	Hypoacetylation	4.16e-15	2.67e-12
HMGA1_HUMAN.H10MO.D	Hypoacetylation	4.22e-15	2.71e-12
ETV3_HUMAN.H10MO.D	Hypoacetylation	5.98e-15	3.83e-12
MEOX1_HUMAN.H10MO.D	Hypoacetylation	6.1e-15	3.91e-12
UNC4_HUMAN.H10MO.D	Hypoacetylation	9.11e-15	5.84e-12
RORG_HUMAN.H10MO.C	Hypoacetylation	9.93e-15	6.36e-12
SOX11_HUMAN.H10MO.D	Hypoacetylation	1.05e-14	6.74e-12
GLI2_HUMAN.H10MO.B	Hypoacetylation	1.57e-14	1.01e-11
PDX1_HUMAN.H10MO.C	Hypoacetylation	1.87e-14	1.2e-11
FOSL2_HUMAN.H10MO.A	Hypoacetylation	2.02e-14	1.3e-11
ALX3_HUMAN.H10MO.D	Hypoacetylation	2.09e-14	1.34e-11
NR2E3_HUMAN.H10MO.C	Hypoacetylation	2.59e-14	1.66e-11
MAFK_HUMAN.H10MO.S	Hypoacetylation	2.67e-14	1.71e-11
GFI1B_HUMAN.H10MO.C	Hypoacetylation	3.99e-14	2.56e-11
PHX2B_HUMAN.H10MO.D	Hypoacetylation	4.31e-14	2.76e-11
STA5B_HUMAN.H10MO.C	Hypoacetylation	4.72e-14	3.03e-11
HNF1B_HUMAN.H10MO.B	Hypoacetylation	5.11e-14	3.28e-11
MAFF_HUMAN.H10MO.A	Hypoacetylation	9.62e-14	6.17e-11
PRRX2_HUMAN.H10MO.C	Hypoacetylation	1.18e-13	7.54e-11
OVOL1_HUMAN.H10MO.C	Hypoacetylation	1.42e-13	9.1e-11
CRX_HUMAN.H10MO.C	Hypoacetylation	2.37e-13	1.52e-10
GBX2_HUMAN.H10MO.D	Hypoacetylation	4.93e-13	3.16e-10
HXD4_HUMAN.H10MO.D	Hypoacetylation	5.53e-13	3.54e-10
NKX28_HUMAN.H10MO.C	Hypoacetylation	6.05e-13	3.88e-10
STA5A_HUMAN.H10MO.B	Hypoacetylation	7.18e-13	4.6e-10
NOBOX_HUMAN.H10MO.C	Hypoacetylation	7.72e-13	4.95e-10
ZIC3_HUMAN.H10MO.C	Hypoacetylation	8e-13	5.13e-10
RORA_HUMAN.H10MO.B	Hypoacetylation	8.09e-13	5.19e-10
FOXB1_HUMAN.H10MO.D	Hypoacetylation	9.47e-13	6.07e-10
DLX1_HUMAN.H10MO.D	Hypoacetylation	1.05e-12	6.71e-10
HXD10_HUMAN.H10MO.D	Hypoacetylation	1.18e-12	7.58e-10
ZFHX3_HUMAN.H10MO.D	Hypoacetylation	1.2e-12	7.69e-10
DLX6_HUMAN.H10MO.D	Hypoacetylation	1.35e-12	8.66e-10
THB_HUMAN.H10MO.S	Hypoacetylation	1.35e-12	8.67e-10
GATA6_HUMAN.H10MO.B	Hypoacetylation	2.7e-12	1.73e-09
ZSC16_HUMAN.H10MO.D	Hypoacetylation	2.87e-12	1.84e-09
NKX23_HUMAN.H10MO.D	Hypoacetylation	3.79e-12	2.43e-09
TLX1_HUMAN.H10MO.S	Hypoacetylation	4.28e-12	2.74e-09
HNF4G_HUMAN.H10MO.C	Hypoacetylation	5.37e-12	3.44e-09
NR5A2_HUMAN.H10MO.C	Hypoacetylation	5.6e-12	3.59e-09
BSH_HUMAN.H10MO.D	Hypoacetylation	5.86e-12	3.75e-09
PPARG_HUMAN.H10MO.A	Hypoacetylation	6.09e-12	3.91e-09
VSX1_HUMAN.H10MO.D	Hypoacetylation	6.31e-12	4.04e-09
DLX2_HUMAN.H10MO.D	Hypoacetylation	7.42e-12	4.76e-09
MEIS1_HUMAN.H10MO.C	Hypoacetylation	7.49e-12	4.8e-09
EMX1_HUMAN.H10MO.D	Hypoacetylation	8.25e-12	5.29e-09
GATA1_HUMAN.H10MO.A	Hypoacetylation	9.03e-12	5.79e-09
EVI1_HUMAN.H10MO.B	Hypoacetylation	1.02e-11	6.53e-09
SOX18_HUMAN.H10MO.D	Hypoacetylation	1.25e-11	8.02e-09
GLI3_HUMAN.H10MO.B	Hypoacetylation	1.3e-11	8.32e-09
RARG_HUMAN.H10MO.C	Hypoacetylation	1.34e-11	8.59e-09
MSX2_HUMAN.H10MO.D	Hypoacetylation	1.37e-11	8.8e-09
HXD11_HUMAN.H10MO.D	Hypoacetylation	1.38e-11	8.87e-09
TBX3_HUMAN.H10MO.D	Hypoacetylation	1.41e-11	9.02e-09
HXB8_HUMAN.H10MO.C	Hypoacetylation	1.44e-11	9.2e-09
HNF6_HUMAN.H10MO.C	Hypoacetylation	1.45e-11	9.26e-09
EMX2_HUMAN.H10MO.D	Hypoacetylation	2.09e-11	1.34e-08
RAX2_HUMAN.H10MO.D	Hypoacetylation	2.2e-11	1.41e-08
ISL1_HUMAN.H10MO.D	Hypoacetylation	2.73e-11	1.75e-08
P5F1B_HUMAN.H10MO.D	Hypoacetylation	3.6e-11	2.31e-08
HSF1_HUMAN.H10MO.A	Hypoacetylation	4.67e-11	2.99e-08
NFKB2_HUMAN.H10MO.D	Hypoacetylation	4.73e-11	3.03e-08
LHX2_HUMAN.H10MO.D	Hypoacetylation	6.54e-11	4.19e-08
ERR2_HUMAN.H10MO.A	Hypoacetylation	7e-11	4.48e-08
FOXA1_HUMAN.H10MO.A	Hypoacetylation	7.09e-11	4.54e-08
SUH_HUMAN.H10MO.C	Hypoacetylation	9.44e-11	6.05e-08
MEIS3_HUMAN.H10MO.D	Hypoacetylation	1.04e-10	6.65e-08
PPARA_HUMAN.H10MO.C	Hypoacetylation	1.22e-10	7.8e-08
GSX2_HUMAN.H10MO.D	Hypoacetylation	1.28e-10	8.22e-08
NR4A1_HUMAN.H10MO.C	Hypoacetylation	1.5e-10	9.65e-08
ISL2_HUMAN.H10MO.D	Hypoacetylation	1.6e-10	1.03e-07
THB_HUMAN.H10MO.C	Hypoacetylation	1.77e-10	1.14e-07
HXB7_HUMAN.H10MO.C	Hypoacetylation	1.85e-10	1.18e-07
PKNX2_HUMAN.H10MO.D	Hypoacetylation	1.89e-10	1.21e-07
MAFA_HUMAN.H10MO.D	Hypoacetylation	2.37e-10	1.52e-07
TAL1_HUMAN.H10MO.A	Hypoacetylation	2.86e-10	1.84e-07
TBX4_HUMAN.H10MO.D	Hypoacetylation	3.32e-10	2.13e-07
ZKSC1_HUMAN.H10MO.C	Hypoacetylation	4.97e-10	3.19e-07
NR4A3_HUMAN.H10MO.D	Hypoacetylation	5.52e-10	3.54e-07
IKZF1_HUMAN.H10MO.C	Hypoacetylation	5.93e-10	3.8e-07
FOSL1_HUMAN.H10MO.A	Hypoacetylation	6.55e-10	4.2e-07
RARA_HUMAN.H10MO.C	Hypoacetylation	7.92e-10	5.08e-07
CEBPD_HUMAN.H10MO.B	Hypoacetylation	8.25e-10	5.29e-07
SOX21_HUMAN.H10MO.D	Hypoacetylation	9.38e-10	6.01e-07
MIXL1_HUMAN.H10MO.D	Hypoacetylation	9.48e-10	6.08e-07
RUNX1_HUMAN.H10MO.A	Hypoacetylation	1.12e-09	7.15e-07
HXB6_HUMAN.H10MO.D	Hypoacetylation	1.12e-09	7.21e-07
NR1D1_HUMAN.H10MO.C	Hypoacetylation	1.18e-09	7.59e-07
PO4F2_HUMAN.H10MO.D	Hypoacetylation	1.21e-09	7.73e-07
VAX2_HUMAN.H10MO.D	Hypoacetylation	1.25e-09	8.03e-07
FOSB_HUMAN.H10MO.C	Hypoacetylation	1.55e-09	9.93e-07
FOXC2_HUMAN.H10MO.D	Hypoacetylation	1.57e-09	1.01e-06
P73_HUMAN.H10MO.A	Hypoacetylation	1.59e-09	1.02e-06
FOXH1_HUMAN.H10MO.A	Hypoacetylation	2.1e-09	1.35e-06
ZBT49_HUMAN.H10MO.D	Hypoacetylation	2.28e-09	1.46e-06
DBP_HUMAN.H10MO.B	Hypoacetylation	3.22e-09	2.06e-06
LHX4_HUMAN.H10MO.D	Hypoacetylation	3.57e-09	2.29e-06
SOX3_HUMAN.H10MO.D	Hypoacetylation	3.98e-09	2.55e-06
FOXM1_HUMAN.H10MO.D	Hypoacetylation	4.62e-09	2.96e-06
TF2LX_HUMAN.H10MO.D	Hypoacetylation	4.86e-09	3.12e-06
ETV2_HUMAN.H10MO.D	Hypoacetylation	5.82e-09	3.73e-06
MAFK_HUMAN.H10MO.A	Hypoacetylation	6.11e-09	3.92e-06
RARG_HUMAN.H10MO.S	Hypoacetylation	6.19e-09	3.97e-06
FOXA2_HUMAN.H10MO.A	Hypoacetylation	6.53e-09	4.19e-06
HXA5_HUMAN.H10MO.D	Hypoacetylation	8.55e-09	5.48e-06
NKX62_HUMAN.H10MO.D	Hypoacetylation	8.89e-09	5.7e-06
NOTO_HUMAN.H10MO.D	Hypoacetylation	9.24e-09	5.92e-06
HXC8_HUMAN.H10MO.D	Hypoacetylation	1.15e-08	7.37e-06
SOX9_HUMAN.H10MO.B	Hypoacetylation	1.23e-08	7.91e-06
TBR1_HUMAN.H10MO.D	Hypoacetylation	1.29e-08	8.25e-06
PROP1_HUMAN.H10MO.D	Hypoacetylation	1.43e-08	9.2e-06
MLXPL_HUMAN.H10MO.D	Hypoacetylation	1.58e-08	1.01e-05
GLI1_HUMAN.H10MO.C	Hypoacetylation	1.69e-08	1.08e-05
GATA5_HUMAN.H10MO.D	Hypoacetylation	1.69e-08	1.08e-05
TBX2_HUMAN.H10MO.D	Hypoacetylation	1.95e-08	1.25e-05
PO6F2_HUMAN.H10MO.D	Hypoacetylation	2.6e-08	1.67e-05
NR6A1_HUMAN.H10MO.B	Hypoacetylation	2.71e-08	1.74e-05
GATA2_HUMAN.H10MO.A	Hypoacetylation	3.04e-08	1.95e-05
VENTX_HUMAN.H10MO.D	Hypoacetylation	3.08e-08	1.97e-05
HXA10_HUMAN.H10MO.C	Hypoacetylation	3.18e-08	2.04e-05
IRX2_HUMAN.H10MO.D	Hypoacetylation	3.24e-08	2.07e-05
HXD3_HUMAN.H10MO.D	Hypoacetylation	3.26e-08	2.09e-05
NR1H4_HUMAN.H10MO.C	Hypoacetylation	3.67e-08	2.35e-05
PO3F2_HUMAN.H10MO.D	Hypoacetylation	3.8e-08	2.44e-05
NR2C1_HUMAN.H10MO.C	Hypoacetylation	4.1e-08	2.63e-05
HXA2_HUMAN.H10MO.D	Hypoacetylation	4.15e-08	2.66e-05
PKNX1_HUMAN.H10MO.D	Hypoacetylation	4.67e-08	2.99e-05
ALX1_HUMAN.H10MO.B	Hypoacetylation	6.19e-08	3.97e-05
PAX4_HUMAN.H10MO.D	Hypoacetylation	7.74e-08	4.96e-05
NANOG_HUMAN.H10MO.S	Hypoacetylation	8.36e-08	5.36e-05
SOX15_HUMAN.H10MO.D	Hypoacetylation	9.47e-08	6.07e-05
P63_HUMAN.H10MO.A	Hypoacetylation	1.67e-07	0.000107
TFE3_HUMAN.H10MO.C	Hypoacetylation	1.98e-07	0.000127
CUX1_HUMAN.H10MO.C	Hypoacetylation	2.03e-07	0.00013
HIC2_HUMAN.H10MO.D	Hypoacetylation	2.13e-07	0.000137
HXB1_HUMAN.H10MO.D	Hypoacetylation	2.73e-07	0.000175
PITX2_HUMAN.H10MO.D	Hypoacetylation	2.75e-07	0.000177
BARX2_HUMAN.H10MO.D	Hypoacetylation	2.88e-07	0.000185
PBX2_HUMAN.H10MO.C	Hypoacetylation	3.78e-07	0.000242
TF7L2_HUMAN.H10MO.A	Hypoacetylation	4.46e-07	0.000286
AIRE_HUMAN.H10MO.C	Hypoacetylation	6.89e-07	0.000442
MYF6_HUMAN.H10MO.C	Hypoacetylation	6.93e-07	0.000444
NKX25_HUMAN.H10MO.C	Hypoacetylation	7.65e-07	0.00049
ETV5_HUMAN.H10MO.D	Hypoacetylation	9.06e-07	0.00058
PAX6_HUMAN.H10MO.D	Hypoacetylation	9.4e-07	0.000602
HNF4A_HUMAN.H10MO.A	Hypoacetylation	9.49e-07	0.000608
HLTF_HUMAN.H10MO.D	Hypoacetylation	1.14e-06	0.000727
NR1I3_HUMAN.H10MO.S	Hypoacetylation	1.14e-06	0.000732
NRL_HUMAN.H10MO.D	Hypoacetylation	1.15e-06	0.000735
NR4A2_HUMAN.H10MO.C	Hypoacetylation	1.18e-06	0.000757
FOS_HUMAN.H10MO.A	Hypoacetylation	1.37e-06	0.000875
HSF2_HUMAN.H10MO.A	Hypoacetylation	2.93e-06	0.00188
NKX21_HUMAN.H10MO.D	Hypoacetylation	2.94e-06	0.00188
PAX2_HUMAN.H10MO.D	Hypoacetylation	3.26e-06	0.00209
TBX20_HUMAN.H10MO.D	Hypoacetylation	3.85e-06	0.00246
ESR1_HUMAN.H10MO.S	Hypoacetylation	4.11e-06	0.00263
MYBB_HUMAN.H10MO.D	Hypoacetylation	5.88e-06	0.00376
NR1I2_HUMAN.H10MO.C	Hypoacetylation	5.91e-06	0.00378
TEAD1_HUMAN.H10MO.D	Hypoacetylation	6.87e-06	0.0044
MYOG_HUMAN.H10MO.D	Hypoacetylation	7.47e-06	0.00478
PPARD_HUMAN.H10MO.D	Hypoacetylation	8.63e-06	0.00551
NR1I3_HUMAN.H10MO.C	Hypoacetylation	8.65e-06	0.00553
MAFG_HUMAN.H10MO.S	Hypoacetylation	1.06e-05	0.00675
ARI5B_HUMAN.H10MO.C	Hypoacetylation	1.25e-05	0.008
SRF_HUMAN.H10MO.A	Hypoacetylation	1.51e-05	0.0096
KLF3_HUMAN.H10MO.D	Hypoacetylation	1.56e-05	0.00995
SOX2_HUMAN.H10MO.B	Hypoacetylation	1.59e-05	0.0101
SOX8_HUMAN.H10MO.D	Hypoacetylation	1.81e-05	0.0115
HXD9_HUMAN.H10MO.D	Hypoacetylation	2.06e-05	0.0131
P73_HUMAN.H10MO.S	Hypoacetylation	2.3e-05	0.0147
THA_HUMAN.H10MO.S	Hypoacetylation	2.4e-05	0.0153
ESR2_HUMAN.H10MO.A	Hypoacetylation	2.6e-05	0.0166
RUNX3_HUMAN.H10MO.C	Hypoacetylation	3.84e-05	0.0243
SNAI2_HUMAN.H10MO.C	Hypoacetylation	4.23e-05	0.0267
RXRA_HUMAN.H10MO.C	Hypoacetylation	4.78e-05	0.0302
HXB3_HUMAN.H10MO.D	Hypoacetylation	5.39e-05	0.0339
STF1_HUMAN.H10MO.B	Hypoacetylation	5.7e-05	0.0359
MESP1_HUMAN.H10MO.D	Hypoacetylation	6.01e-05	0.0378
P63_HUMAN.H10MO.S	Hypoacetylation	6.67e-05	0.0419
