# Supplementary material for: H3K27ac acetylome signatures reveal the epigenomic reorganization in remodeled non-failing human hearts
Source: Clin Epigenetics. 2020 Jul 14;12:106. doi: 10.1186/s13148-020-00895-5 (PMC7362435; doi:10.1186/s13148-020-00895-5)
Supplement: Supplementary file 14 — Additional file 14. Supplementary Table 8. The chromatin acetylation changes and the mRNA expression changes of key regulators and targets in the Hippo pathway. [file 13148_2020_895_MOESM14_ESM.xlsx]

## Sheet: Supplementary Table 8
Supplementary Table 8: The chromatin acetylation changes and the mRNA expression changes of key regulators and targets in the Hippo pathway.
Gene	Gene Name	Chromatin Acetylation (H3K27ac ChIP-seq)	mRNA expression change (RNA-seq)		↑: Significantly higher acetylation level and/or mRNA expression level in patients when compared with the controls
MST1	Macrophage Stimulating 1	↑	NC		↓: Significantly lower acetylation level and/or mRNA expression level in patients when compared with the controls
MST2/STK3	Serine/Threonine Kinase 3	↑	NC		NC: Not changed, histone acetylation level and/or mRNA expression level remain comparable between patient and control groups
TAOK1	TAO Kinase 1	NC	NC
TAOK2	TAO Kinase 2	↑	NC
TAOK3	TAO Kinase 3	NC	NC
MAP4K1	Mitogen-Activated Protein Kinase Kinase Kinase Kinase 1	↓	↓
MAP4K2	Mitogen-Activated Protein Kinase Kinase Kinase Kinase 2	NC	NC
MAP4k3	Mitogen-Activated Protein Kinase Kinase Kinase Kinase 3	NC	NC
MAP4K4	Mitogen-Activated Protein Kinase Kinase Kinase Kinase 4	NC	NC
MAP4K5	Mitogen-Activated Protein Kinase Kinase Kinase Kinase 5	NC	NC
LATS1	Large Tumor Suppressor Kinase 1	NC	NC
LATS2	Large Tumor Suppressor Kinase 2	↓	NC
YAP1	Yes Associated Protein 1	NC	NC
TAZ	Tafazzin	NC	NC
